# Supplementary material
Source: publisher site journal article supplement (https://www.dovepress.com/article/327657)
Supplement: Supplementary file 1 [file get_supplementary_file.php]

## Supplementary table 1

### Summary of differentially expressed genes (DEGs) and miRNAs (DEMs) between NPC and normal samples.

#### Upregulated DEGs

ADAM23  
ANLN  
BMP2  
BUB1B  
CCL8  
CENPF  
COL4A1  
COL5A1  
COL5A2  
COL8A1  
DST  
FN1  
GALNT11  
GJA1  
GPNMB  
HOXA10  
IDH1  
IFIH1  
IFIT3  
KIF23  
LAMB1  
MMP1  
MMP3  
NFE2L3  
NRXN1  
PLAU  
POSTN  
PRC1  
PTGS2  
RCN1  
SOX4  
SSTR2  
TNFAIP6  
TOP2A  
VRK2  
XG  
ZIC2

## Downregulated DEGs

LTF

TEKT1

PIGR

MSLN

ROPN1L

CR2

SPAG6

AK7

MSMB

SCGB1A1

CLU

KRT4

TMC5

DNAI1

SLC27A6

ZMYND10

MS4A1

UPK1B

C22orf23

STATH

TEKT2

CD22

PTGDS

VPREB3

PROM1

CHST9

CAPS

CASC1

RIBC2

FAM3D

BANK1

RGS13

ATP12A

CD19

RRAD

AGR2

RIBC1

EFHC2

CH25H

RAB37

ZMYND12

CYP4B1

PZP

MEF2C

CD1D

CRYM

SERPINB7

WFDC2  
KLRB1  
HRASLS2  
IQCD  
CDH26  
SLPI  
BCAS1  
KLF2  
RALGPS2  
LRMP  
CXCL14  
C9orf116  
CEACAM6  
GCNT3  
OSBPL10  
C3  
POU2AF1  
PLCG2  
ALDH3A1  
S100P  
ALOX15  
LRRC6  
MUC13  
SPA17  
KIF9  
LTB  
EFHC1  
ADAM28  
SYNE1  
MUC20  
VSIG2  
TNFSF11  
KRT23  
SLC22A4  
FUT3  
DUOX1  
LCN2  
CXXC5

## DEMs

hsa-miR-1  
hsa-miR-105  
hsa-miR-135b  
hsa-miR-144  
hsa-miR-149  
hsa-miR-154  
hsa-miR-184  
hsa-miR-18a  
hsa-miR-190  
hsa-miR-208  
hsa-miR-211  
hsa-miR-219  
hsa-miR-302c  
hsa-miR-30a-3p  
hsa-miR-31  
hsa-miR-323  
hsa-miR-345  
hsa-miR-346  
hsa-miR-34b  
hsa-miR-34c  
hsa-miR-363  
hsa-miR-365  
hsa-miR-371  
hsa-miR-372  
hsa-miR-376a  
hsa-miR-377  
hsa-miR-380-3p  
hsa-miR-383  
hsa-miR-432  
hsa-miR-448  
hsa-miR-449  
hsa-miR-452  
hsa-miR-453  
hsa-miR-455  
hsa-miR-511  
hsa-miR-514  
hsa-miR-518b  
hsa-miR-520a  
hsa-miR-520g  
hsa-miR-521  
hsa-miR-523  
hsa-miR-526c  
hsa-miR-544  
hsa-miR-9

**Supplementary table 2**  
**Four significant modules from the PPI network.**

| SUID | AverageShortestPathLength | ClusteringCoefficient | ClusterQuality | Degree     | Eccentricity | IsSingleNode | MCODE     | ClusMCODE | ModMCODE | Seed    | Scanname   | Neighborho | NumberofC | NumberofU | NumberofP | NumberofM  | Radiality | selected | Selfloops | shared name | Stress     | TopologicalCoefficient |
|------|---------------------------|-----------------------|----------------|------------|--------------|--------------|-----------|-----------|----------|---------|------------|------------|-----------|-----------|-----------|------------|-----------|----------|-----------|-------------|------------|------------------------|
| 1359 | 3.31395349                | 0.02030416            | 0.30175439     | 0.48888899 | 10           | FALSE        | Cluster 1 | Clustered | 5        | BMP2    | 9          | 1          | 10        | 0         | 0         | 0.80717054 | FALSE     | 0        | BMP2      | 604         | 0.28470588 |                        |
| 1380 | 3.47674419                | 0.01466421            | 0.26762542     | 0.46666667 | 6            | FALSE        | Cluster 1 | Clustered | 4        | TNFAIP6 | 10.1666667 | 1          | 6         | 0         | 0         | 0.79360465 | FALSE     | 0        | TNFAIP6   | 442         | 0.31770833 |                        |
| 1383 | 3.40697674                | 0.0250384             | 0.29351538     | 0.42857143 | 7            | FALSE        | Cluster 1 | Clustered | 4        | MSLN    | 9.71428571 | 2          | 7         | 0         | 0         | 0.7994186  | FALSE     | 0        | MSLN      | 502         | 0.25868726 |                        |
| 1364 | 3.59069767                | 0.11722927            | 0.30386693     | 0.4        | 10           | FALSE        | Cluster 1 | Clustered | 5        | MMIP3   | 8.5        | 1          | 10        | 0         | 0         | 0.80910653 | FALSE     | 0        | MMIP3     | 1652        | 0.24411765 |                        |
| 1366 | 3.56046512                | 0.00272452            | 0.29757785     | 0.76190476 | 7            | FALSE        | Cluster 1 | Clustered | 5        | MMIP1   | 11         | 1          | 7         | 0         | 0         | 0.80329457 | FALSE     | 0        | MMIP1     | 110         | 0.32352941 |                        |
| 1334 | 3.29069767                | 0.0746891             | 0.30386693     | 0.28787879 | 12           | FALSE        | Cluster 1 | Clustered | 5        | PTGS2   | 6.75       | 1          | 12        | 0         | 0         | 0.80910853 | FALSE     | 0        | PTGS2     | 1288        | 0.203125   |                        |
| 1336 | 4.53023256                | 0                     | 0.20283019     | 1          | 5            | FALSE        | Cluster 1 | Clustered | 5        | ANLN    | 5.6        | 1          | 5         | 0         | 0         | 0.67248062 | FALSE     | 0        | ANLN      | 0           | 0.7        |                        |
| 1337 | 4.40697674                | 0.03102371            | 0.22681293     | 0.47619048 | 7            | FALSE        | Cluster 1 | Clustered | 5        | KIF23   | 4.57142857 | 1          | 7         | 0         | 0         | 0.71608527 | FALSE     | 0        | KIF23     | 778         | 0.42857143 |                        |
| 1370 | 2.6744186                 | 0.49758878            | 0.37991304     | 0.19480519 | 22           | FALSE        | Cluster 1 | Seeded    | 5        | FN1     | 7.40909091 | 1          | 22        | 0         | 0         | 0.86946512 | FALSE     | 0        | FN1       | 10066       | 0.13149351 |                        |
| 1339 | 4.53023256                | 0                     | 0.20283019     | 1          | 5            | FALSE        | Cluster 1 | Clustered | 5        | BUB1B   | 5.6        | 1          | 5         | 0         | 0         | 0.67248062 | FALSE     | 0        | BUB1B     | 0           | 0.7        |                        |
| 1341 | 4.53023256                | 0                     | 0.20283019     | 1          | 5            | FALSE        | Cluster 1 | Clustered | 5        | TOP2A   | 5.6        | 1          | 5         | 0         | 0         | 0.67248062 | FALSE     | 0        | TOP2A     | 0           | 0.7        |                        |
| 1343 | 4.10465116                | 0.06834365            | 0.24362606     | 0.66666667 | 6            | FALSE        | Cluster 1 | Clustered | 5        | CENPF   | 5.66666667 | 1          | 6         | 0         | 0         | 0.74127907 | FALSE     | 0        | CENPF     | 1622        | 0.42307692 |                        |
| 1345 | 4.53023256                | 0                     | 0.20283019     | 1          | 5            | FALSE        | Cluster 1 | Clustered | 5        | PRC1    | 5.6        | 1          | 5         | 0         | 0         | 0.67248062 | FALSE     | 0        | PRC1      | 0           | 0.7        |                        |
| 1348 | 3.41860465                | 0.03974044            | 0.29251701     | 0.5        | 8            | FALSE        | Cluster 1 | Clustered | 5        | TNFSF11 | 8.75       | 2          | 8         | 0         | 0         | 0.79844961 | FALSE     | 0        | TNFSF11   | 622         | 0.27822581 |                        |
| 1382 | 3.27906977                | 0.04918838            | 0.30496454     | 0.27777778 | 9            | FALSE        | Cluster 1 | Clustered | 4        | C3      | 8.22222222 | 2          | 9         | 0         | 0         | 0.81007752 | FALSE     | 0        | C3        | 986         | 0.19512195 |                        |
| 1383 | 3.56976744                | 0                     | 0.28013029     | 1          | 4            | FALSE        | Cluster 1 | Clustered | 4        | RGN1    | 11.25      | 1          | 4         | 0         | 0         | 0.79585271 | FALSE     | 0        | RGN1      | 96          | 0.41666667 |                        |
| 1320 | 3.27906977                | 0.11058734            | 0.30496454     | 0.28571429 | 7            | FALSE        | Cluster 1 | Clustered | 4        | PLAU    | 9          | 1          | 7         | 0         | 0         | 0.81007752 | FALSE     | 0        | PLAU      | 2824        | 0.24489796 |                        |

module 2

| SUID | AverageShortBetweennessClosenessCg | ClusteringCg | Degree     | Eccentricity | isSingleNode | MCODE_Clus | MCODE_Nod | MCODE_Seqname     | Neighborhood no | NumberOfDir | NumberOfTur | Partno | QIMU | Radiality  | selected | SelfLoops | shared name | Stress | TopologicalCoefficient |
|------|------------------------------------|--------------|------------|--------------|--------------|------------|-----------|-------------------|-----------------|-------------|-------------|--------|------|------------|----------|-----------|-------------|--------|------------------------|
| 1460 | 4.41860465                         | 0            | 0.22631579 | 4            | FALSE        | Cluster 2  | Seed      | 4 COL5A1          | 7.25            | 1           | 4           | 0      | 0    | 0.71511628 | FALSE    | 0         | COL5A1      | 0      | 0.725                  |
| 1464 | 3.52325581                         | 0.00743913   | 0.26392838 | 7            | FALSE        | Cluster 2  | Clustered | 3.42857143 COL5A1 | 9.28571429      | 1           | 7           | 0      | 0    | 0.78972868 | FALSE    | 0         | COL5A1      | 324    | 0.37142857             |
| 1466 | 3.59302326                         | 0.00441138   | 0.27831715 | 6            | FALSE        | Cluster 2  | Clustered | 3.42857143 COL5A2 | 9.33333333      | 1           | 6           | 0      | 0    | 0.78391473 | FALSE    | 0         | COL5A2      | 244    | 0.4057971              |
| 1373 | 3.54651163                         | 0.00715907   | 0.26196721 | 8            | FALSE        | Cluster 2  | Clustered | 3.42857143 COL4A1 | 8.025           | 1           | 8           | 0      | 0    | 0.7877907  | FALSE    | 0         | COL4A1      | 346    | 0.359375               |

Module 3

| SUID | AverageShortBetweennessClosenessCg | ClusteringCg | Degree     | Eccentricity | isSingleNode | MCODE_Clus | MCODE_Nod | MCODE_Scan | Neighborhoon no | NumberOfDir | NumberOfTur | ParmsCINuI | Radiality  | selected | SelfLoops | shared name | Stress | TopologicalCoefficient |
|------|------------------------------------|--------------|------------|--------------|--------------|------------|-----------|------------|-----------------|-------------|-------------|------------|------------|----------|-----------|-------------|--------|------------------------|
| 1440 | 3.5                                | 0.02450341   | 0.28571429 | 0.5          | FALSE        | Cluster 3  | Sead      | 3 RAB37    | 7               | 2           | 4           | 0          | 0.79166667 | FALSE    | 0         | RAB37       | 902    | 0.3375                 |
| 1400 | 3.52325581                         | 0.08686964   | 0.28392838 | 0.14285714   | FALSE        | Cluster 3  | Clustered | 3 LRMP     | 342867143       | 2           | 7           | 0          | 0.78972868 | FALSE    | 0         | LRMP        | 1584   | 0.20408183             |
| 1323 | 2.86511623                         | 0.38692897   | 0.3372549  | 0.14285714   | FALSE        | Cluster 3  | Clustered | 3 CEACAM6  | 6.875           | 2           | 8           | 0          | 0.83824031 | FALSE    | 0         | CEACAM6     | 11774  | 0.17667588             |
| 1389 | 3.47674419                         | 0.03106455   | 0.28762542 | 0.28666667   | FALSE        | Cluster 3  | Clustered | 3 PI3R     | 6.33333333      | 2           | 6           | 0          | 0.79500465 | FALSE    | 0         | PI3R        | 888    | 0.24666667             |

module 4

| SUID | AverageShortBetweennessClosenessCg | ClusteringCg | Degree     | Eccentricity | isSingleNode | MCODE_Cluster | MCODE_Nod | MCODE_Seqname | Neighborhood no | NumberOfDir | NumberOfTur | Partno | CINMI | Radiality  | selected | SelfLoops | shared name | Stress | TopologicalCoefficient |
|------|------------------------------------|--------------|------------|--------------|--------------|---------------|-----------|---------------|-----------------|-------------|-------------|--------|-------|------------|----------|-----------|-------------|--------|------------------------|
| 1488 | 6.39534884                         | 0.08452804   | 0.15636364 | 5            | FALSE        | Cluster 5     | Seed      | 2.4 SPAG6     | 5.4             | 2           | 5           | 0      | 0     | 0.5503876  | FALSE    | 0         | SPAG6       | 3752   | 0.43333333             |
| 1484 | 8.23255814                         | 0            | 0.12146893 | 2            | FALSE        | Cluster 5     | Clustered | 2 LRR06       | 4.5             | 2           | 2           | 0      | 0     | 0.39728682 | FALSE    | 0         | LRR06       | 0      | 0.64285714             |
| 1481 | 7.25681395                         | 0.04626995   | 0.13782051 | 7            | FALSE        | Cluster 5     | Clustered | 2.2 DNMI1     | 4.14285714      | 2           | 7           | 0      | 0     | 0.42768217 | FALSE    | 0         | DNMI1       | 1924   | 0.41428571             |
| 1482 | 7.26744186                         | 0.01200339   | 0.1378     | 6            | FALSE        | Cluster 5     | Clustered | 2.2 TER12     | 4.5             | 2           | 6           | 0      | 0     | 0.47771318 | FALSE    | 0         | TER12       | 962    | 0.48148148             |
| 1484 | 8.23255814                         | 0            | 0.12146893 | 2            | FALSE        | Cluster 5     | Clustered | 2 ZMYND10     | 4.5             | 2           | 2           | 0      | 0     | 0.39728682 | FALSE    | 0         | ZMYND10     | 0      | 0.64285714             |

| SUID | AverageShortBetweennessClosenessCg | ClusteringCg | Degree     | Eccentricity | isSingleNode | MCODE_Cluster | MCODE_Nod | MCODE_Seqname | Neighborhood no | NumberOfDir | NumberOfTur | Partno | CINMI | Radiality  | selected | SelfLoops | shared name | Stress | TopologicalCoefficient |
|------|------------------------------------|--------------|------------|--------------|--------------|---------------|-----------|---------------|-----------------|-------------|-------------|--------|-------|------------|----------|-----------|-------------|--------|------------------------|
| 1488 | 6.39534884                         | 0.08452804   | 0.15636364 | 5            | FALSE        | Cluster 5     | Seed      | 2.4 SPAG6     | 5.4             | 2           | 5           | 0      | 0     | 0.5503876  | FALSE    | 0         | SPAG6       | 3752   | 0.43333333             |
| 1484 | 8.23255814                         | 0            | 0.12146893 | 2            | FALSE        | Cluster 5     | Clustered | 2 LRR06       | 4.5             | 2           | 2           | 0      | 0     | 0.39728682 | FALSE    | 0         | LRR06       | 0      | 0.64285714             |
| 1481 | 7.25681395                         | 0.04626995   | 0.13782051 | 7            | FALSE        | Cluster 5     | Clustered | 2.2 DNMI1     | 4.14285714      | 2           | 7           | 0      | 0     | 0.42768217 | FALSE    | 0         | DNMI1       | 1924   | 0.41428571             |
| 1482 | 7.26744186                         | 0.01200339   | 0.1378     | 6            | FALSE        | Cluster 5     | Clustered | 2.2 TER12     | 4.5             | 2           | 6           | 0      | 0     | 0.47771318 | FALSE    | 0         | TER12       | 962    | 0.48148148             |
| 1484 | 8.23255814                         | 0            | 0.12146893 | 2            | FALSE        | Cluster 5     | Clustered | 2 ZMYND10     | 4.5             | 2           | 2           | 0      | 0     | 0.39728682 | FALSE    | 0         | ZMYND10     | 0      | 0.64285714             |





**Supplementary table 4**

**Summary of candidate miRNAs predicted using miRWalk online database.**

| mimaid        | refseqid   | genesymbol | bindingp   |
|---------------|------------|------------|------------|
| hsa-miR-629-  | NM_000064  | C3         | 0.95       |
| hsa-miR-1207  | NM_000064  | C3         | 0.96153846 |
| hsa-miR-6891  | NM_000064  | C3         | 0.96538462 |
| hsa-miR-3665  | NM_000064  | C3         | 0.98076923 |
| hsa-miR-6763  | NM_000064  | C3         | 0.98076923 |
| hsa-miR-6782  | NM_000064  | C3         | 0.98076923 |
| hsa-miR-6791  | NM_000064  | C3         | 0.98717949 |
| hsa-miR-27a-  | NM_000064  | C3         | 1          |
| hsa-miR-210-  | NM_000064  | C3         | 1          |
| hsa-miR-30b-  | NM_000064  | C3         | 1          |
| hsa-miR-125a  | NM_000064  | C3         | 1          |
| hsa-miR-296-  | NM_000064  | C3         | 1          |
| hsa-miR-550a  | NM_000064  | C3         | 1          |
| hsa-miR-1236  | NM_000064  | C3         | 1          |
| hsa-miR-1304  | NM_000064  | C3         | 1          |
| hsa-miR-3124  | NM_000064  | C3         | 1          |
| hsa-miR-3188  | NM_000064  | C3         | 1          |
| hsa-miR-3196  | NM_000064  | C3         | 1          |
| hsa-miR-3198  | NM_000064  | C3         | 1          |
| hsa-miR-4316  | NM_000064  | C3         | 1          |
| hsa-miR-4271  | NM_000064  | C3         | 1          |
| hsa-miR-4287  | NM_000064  | C3         | 1          |
| hsa-miR-362C  | NM_000064  | C3         | 1          |
| hsa-miR-3917  | NM_000064  | C3         | 1          |
| hsa-miR-4463  | NM_000064  | C3         | 1          |
| hsa-miR-4463  | NM_000064  | C3         | 1          |
| hsa-miR-4471  | NM_000064  | C3         | 1          |
| hsa-miR-4496  | NM_000064  | C3         | 1          |
| hsa-miR-2392  | NM_000064  | C3         | 1          |
| hsa-miR-4507  | NM_000064  | C3         | 1          |
| hsa-miR-1587  | NM_000064  | C3         | 1          |
| hsa-miR-4538  | NM_000064  | C3         | 1          |
| hsa-miR-4653  | NM_000064  | C3         | 1          |
| hsa-miR-469C  | NM_000064  | C3         | 1          |
| hsa-miR-4704  | NM_000064  | C3         | 1          |
| hsa-miR-4738  | NM_000064  | C3         | 1          |
| hsa-miR-4793  | NM_000064  | C3         | 1          |
| hsa-miR-5589  | NM_000064  | C3         | 1          |
| hsa-miR-5787  | NM_000064  | C3         | 1          |
| hsa-miR-6085  | NM_000064  | C3         | 1          |
| hsa-miR-6133  | NM_000064  | C3         | 1          |
| hsa-miR-6134  | NM_000064  | C3         | 1          |
| hsa-miR-6134  | NM_000064  | C3         | 1          |
| hsa-miR-675C  | NM_000064  | C3         | 1          |
| hsa-miR-6766  | NM_000064  | C3         | 1          |
| hsa-miR-6772  | NM_000064  | C3         | 1          |
| hsa-miR-6773  | NM_000064  | C3         | 1          |
| hsa-miR-6788  | NM_000064  | C3         | 1          |
| hsa-miR-6794  | NM_000064  | C3         | 1          |
| hsa-miR-6823  | NM_000064  | C3         | 1          |
| hsa-miR-684C  | NM_000064  | C3         | 1          |
| hsa-miR-6854  | NM_000064  | C3         | 1          |
| hsa-miR-6867  | NM_000064  | C3         | 1          |
| hsa-miR-6882  | NM_000064  | C3         | 1          |
| hsa-miR-7154  | NM_000064  | C3         | 1          |
| hsa-miR-4433  | NM_000064  | C3         | 1          |
| hsa-miR-784E  | NM_000064  | C3         | 1          |
| hsa-miR-8082  | NM_000064  | C3         | 1          |
| hsa-miR-1211  | NM_000064  | C3         | 1          |
| hsa-miR-443C  | NM_0012780 | COL5A1     | 0.95384615 |
| hsa-miR-8071  | NM_0012780 | COL5A1     | 0.95384615 |
| hsa-miR-443C  | NM_000093  | COL5A1     | 0.95384615 |
| hsa-miR-8071  | NM_000093  | COL5A1     | 0.95384615 |
| hsa-miR-3138  | NM_0012780 | COL5A1     | 0.96153846 |
| hsa-miR-4464  | NM_0012780 | COL5A1     | 0.96153846 |
| hsa-miR-3138  | NM_000093  | COL5A1     | 0.96153846 |
| hsa-miR-4464  | NM_000093  | COL5A1     | 0.96153846 |
| hsa-miR-1178  | NM_0012780 | COL5A1     | 0.97435897 |
| hsa-miR-4302  | NM_0012780 | COL5A1     | 0.97435897 |
| hsa-miR-361C  | NM_0012780 | COL5A1     | 0.97435897 |
| hsa-miR-676-  | NM_0012780 | COL5A1     | 0.97435897 |
| hsa-miR-1178  | NM_000093  | COL5A1     | 0.97435897 |
| hsa-miR-4302  | NM_000093  | COL5A1     | 0.97435897 |
| hsa-miR-361C  | NM_000093  | COL5A1     | 0.97435897 |
| hsa-miR-676-  | NM_000093  | COL5A1     | 0.97435897 |
| hsa-miR-1238  | NM_0012780 | COL5A1     | 0.98076923 |
| hsa-miR-1204  | NM_0012780 | COL5A1     | 0.98076923 |
| hsa-miR-430C  | NM_0012780 | COL5A1     | 0.98076923 |
| hsa-miR-7111  | NM_0012780 | COL5A1     | 0.98076923 |
| hsa-miR-1238  | NM_000093  | COL5A1     | 0.98076923 |
| hsa-miR-1204  | NM_000093  | COL5A1     | 0.98076923 |
| hsa-miR-430C  | NM_000093  | COL5A1     | 0.98076923 |
| hsa-miR-7111  | NM_000093  | COL5A1     | 0.98076923 |
| hsa-miR-3157  | NM_0012780 | COL5A1     | 0.98717949 |
| hsa-miR-3157  | NM_000093  | COL5A1     | 0.98717949 |
| hsa-miR-25-5j | NM_0012780 | COL5A1     | 1          |
| hsa-miR-197-  | NM_0012780 | COL5A1     | 1          |
| hsa-miR-30c;  | NM_0012780 | COL5A1     | 1          |
| hsa-miR-181a  | NM_0012780 | COL5A1     | 1          |
| hsa-miR-183-  | NM_0012780 | COL5A1     | 1          |
| hsa-miR-212-  | NM_0012780 | COL5A1     | 1          |

|                                 |   |
|---------------------------------|---|
| hsa-miR-125t NM_0012780 COL5A1  | 1 |
| hsa-miR-143-1 NM_0012780 COL5A1 | 1 |
| hsa-miR-125a NM_0012780 COL5A1  | 1 |
| hsa-miR-34b-1 NM_0012780 COL5A1 | 1 |
| hsa-miR-130b NM_0012780 COL5A1  | 1 |
| hsa-miR-302d NM_0012780 COL5A1  | 1 |
| hsa-miR-371a NM_0012780 COL5A1  | 1 |
| hsa-miR-373-1 NM_0012780 COL5A1 | 1 |
| hsa-miR-376a NM_0012780 COL5A1  | 1 |
| hsa-miR-324-1 NM_0012780 COL5A1 | 1 |
| hsa-miR-423-1 NM_0012780 COL5A1 | 1 |
| hsa-miR-376b NM_0012780 COL5A1  | 1 |
| hsa-miR-483-1 NM_0012780 COL5A1 | 1 |
| hsa-miR-486-1 NM_0012780 COL5A1 | 1 |
| hsa-miR-487a NM_0012780 COL5A1  | 1 |
| hsa-miR-489-1 NM_0012780 COL5A1 | 1 |
| hsa-miR-517c NM_0012780 COL5A1  | 1 |
| hsa-miR-500a NM_0012780 COL5A1  | 1 |
| hsa-miR-501-1 NM_0012780 COL5A1 | 1 |
| hsa-miR-502-1 NM_0012780 COL5A1 | 1 |
| hsa-miR-506-1 NM_0012780 COL5A1 | 1 |
| hsa-miR-510-1 NM_0012780 COL5A1 | 1 |
| hsa-miR-455-1 NM_0012780 COL5A1 | 1 |
| hsa-miR-539-1 NM_0012780 COL5A1 | 1 |
| hsa-miR-487b NM_0012780 COL5A1  | 1 |
| hsa-miR-567-1 NM_0012780 COL5A1 | 1 |
| hsa-miR-573-1 NM_0012780 COL5A1 | 1 |
| hsa-miR-589-1 NM_0012780 COL5A1 | 1 |
| hsa-miR-550a NM_0012780 COL5A1  | 1 |
| hsa-miR-601-1 NM_0012780 COL5A1 | 1 |
| hsa-miR-605-1 NM_0012780 COL5A1 | 1 |
| hsa-miR-605-2 NM_0012780 COL5A1 | 1 |
| hsa-miR-619-1 NM_0012780 COL5A1 | 1 |
| hsa-miR-630-1 NM_0012780 COL5A1 | 1 |
| hsa-miR-640-1 NM_0012780 COL5A1 | 1 |
| hsa-miR-642a NM_0012780 COL5A1  | 1 |
| hsa-miR-644a NM_0012780 COL5A1  | 1 |
| hsa-miR-645-1 NM_0012780 COL5A1 | 1 |
| hsa-miR-648-1 NM_0012780 COL5A1 | 1 |
| hsa-miR-1298 NM_0012780 COL5A1  | 1 |
| hsa-miR-2113 NM_0012780 COL5A1  | 1 |
| hsa-miR-708-1 NM_0012780 COL5A1 | 1 |
| hsa-miR-877-1 NM_0012780 COL5A1 | 1 |
| hsa-miR-887-1 NM_0012780 COL5A1 | 1 |
| hsa-miR-301b NM_0012780 COL5A1  | 1 |
| hsa-miR-509-1 NM_0012780 COL5A1 | 1 |
| hsa-miR-936-1 NM_0012780 COL5A1 | 1 |
| hsa-miR-937-1 NM_0012780 COL5A1 | 1 |
| hsa-miR-1236 NM_0012780 COL5A1  | 1 |
| hsa-miR-1208 NM_0012780 COL5A1  | 1 |
| hsa-miR-1255 NM_0012780 COL5A1  | 1 |
| hsa-miR-1276 NM_0012780 COL5A1  | 1 |
| hsa-miR-191C NM_0012780 COL5A1  | 1 |
| hsa-miR-191D NM_0012780 COL5A1  | 1 |
| hsa-miR-1973 NM_0012780 COL5A1  | 1 |
| hsa-miR-2115 NM_0012780 COL5A1  | 1 |
| hsa-miR-2117 NM_0012780 COL5A1  | 1 |
| hsa-miR-2117 NM_0012780 COL5A1  | 1 |
| hsa-miR-3121 NM_0012780 COL5A1  | 1 |
| hsa-miR-3124 NM_0012780 COL5A1  | 1 |
| hsa-miR-3124 NM_0012780 COL5A1  | 1 |
| hsa-miR-3126 NM_0012780 COL5A1  | 1 |
| hsa-miR-3126 NM_0012780 COL5A1  | 1 |
| hsa-miR-3155 NM_0012780 COL5A1  | 1 |
| hsa-miR-3159 NM_0012780 COL5A1  | 1 |
| hsa-miR-3175 NM_0012780 COL5A1  | 1 |
| hsa-miR-3177 NM_0012780 COL5A1  | 1 |
| hsa-miR-3187 NM_0012780 COL5A1  | 1 |
| hsa-miR-3198 NM_0012780 COL5A1  | 1 |
| hsa-miR-320C NM_0012780 COL5A1  | 1 |
| hsa-miR-3202 NM_0012780 COL5A1  | 1 |
| hsa-miR-4265 NM_0012780 COL5A1  | 1 |
| hsa-miR-4275 NM_0012780 COL5A1  | 1 |
| hsa-miR-3605 NM_0012780 COL5A1  | 1 |
| hsa-miR-3622 NM_0012780 COL5A1  | 1 |
| hsa-miR-366C NM_0012780 COL5A1  | 1 |
| hsa-miR-368C NM_0012780 COL5A1  | 1 |
| hsa-miR-3688 NM_0012780 COL5A1  | 1 |
| hsa-miR-3691 NM_0012780 COL5A1  | 1 |
| hsa-miR-3918 NM_0012780 COL5A1  | 1 |
| hsa-miR-3922 NM_0012780 COL5A1  | 1 |
| hsa-miR-4428 NM_0012780 COL5A1  | 1 |
| hsa-miR-4444 NM_0012780 COL5A1  | 1 |
| hsa-miR-4447 NM_0012780 COL5A1  | 1 |
| hsa-miR-445C NM_0012780 COL5A1  | 1 |
| hsa-miR-3155 NM_0012780 COL5A1  | 1 |
| hsa-miR-449C NM_0012780 COL5A1  | 1 |
| hsa-miR-4495 NM_0012780 COL5A1  | 1 |
| hsa-miR-2392 NM_0012780 COL5A1  | 1 |
| hsa-miR-451E NM_0012780 COL5A1  | 1 |
| hsa-miR-3976 NM_0012780 COL5A1  | 1 |
| hsa-miR-4632 NM_0012780 COL5A1  | 1 |
| hsa-miR-4633 NM_0012780 COL5A1  | 1 |
| hsa-miR-4646 NM_0012780 COL5A1  | 1 |



|                                |   |
|--------------------------------|---|
| hsa-miR-711c NM_0012780 COL5A1 | 1 |
| hsa-miR-7113 NM_0012780 COL5A1 | 1 |
| hsa-miR-7152 NM_0012780 COL5A1 | 1 |
| hsa-miR-7154 NM_0012780 COL5A1 | 1 |
| hsa-miR-7157 NM_0012780 COL5A1 | 1 |
| hsa-miR-7158 NM_0012780 COL5A1 | 1 |
| hsa-miR-7705 NM_0012780 COL5A1 | 1 |
| hsa-miR-4433 NM_0012780 COL5A1 | 1 |
| hsa-miR-9898 NM_0012780 COL5A1 | 1 |
| hsa-miR-3055 NM_0012780 COL5A1 | 1 |
| hsa-miR-3059 NM_0012780 COL5A1 | 1 |
| hsa-miR-1211 NM_0012780 COL5A1 | 1 |
| hsa-miR-25-5j NM_000093 COL5A1 | 1 |
| hsa-miR-197- NM_000093 COL5A1  | 1 |
| hsa-miR-30c- NM_000093 COL5A1  | 1 |
| hsa-miR-181a NM_000093 COL5A1  | 1 |
| hsa-miR-183- NM_000093 COL5A1  | 1 |
| hsa-miR-212- NM_000093 COL5A1  | 1 |
| hsa-miR-125b NM_000093 COL5A1  | 1 |
| hsa-miR-143- NM_000093 COL5A1  | 1 |
| hsa-miR-125a NM_000093 COL5A1  | 1 |
| hsa-miR-34b- NM_000093 COL5A1  | 1 |
| hsa-miR-130b NM_000093 COL5A1  | 1 |
| hsa-miR-302d NM_000093 COL5A1  | 1 |
| hsa-miR-371a NM_000093 COL5A1  | 1 |
| hsa-miR-373- NM_000093 COL5A1  | 1 |
| hsa-miR-376a NM_000093 COL5A1  | 1 |
| hsa-miR-324- NM_000093 COL5A1  | 1 |
| hsa-miR-423- NM_000093 COL5A1  | 1 |
| hsa-miR-376b NM_000093 COL5A1  | 1 |
| hsa-miR-483- NM_000093 COL5A1  | 1 |
| hsa-miR-486- NM_000093 COL5A1  | 1 |
| hsa-miR-487a NM_000093 COL5A1  | 1 |
| hsa-miR-489- NM_000093 COL5A1  | 1 |
| hsa-miR-517c NM_000093 COL5A1  | 1 |
| hsa-miR-500a NM_000093 COL5A1  | 1 |
| hsa-miR-501- NM_000093 COL5A1  | 1 |
| hsa-miR-502- NM_000093 COL5A1  | 1 |
| hsa-miR-506- NM_000093 COL5A1  | 1 |
| hsa-miR-510- NM_000093 COL5A1  | 1 |
| hsa-miR-455- NM_000093 COL5A1  | 1 |
| hsa-miR-539- NM_000093 COL5A1  | 1 |
| hsa-miR-487b NM_000093 COL5A1  | 1 |
| hsa-miR-567 NM_000093 COL5A1   | 1 |
| hsa-miR-573 NM_000093 COL5A1   | 1 |
| hsa-miR-589- NM_000093 COL5A1  | 1 |
| hsa-miR-550a NM_000093 COL5A1  | 1 |
| hsa-miR-601 NM_000093 COL5A1   | 1 |
| hsa-miR-605- NM_000093 COL5A1  | 1 |
| hsa-miR-605- NM_000093 COL5A1  | 1 |
| hsa-miR-619- NM_000093 COL5A1  | 1 |
| hsa-miR-630 NM_000093 COL5A1   | 1 |
| hsa-miR-640 NM_000093 COL5A1   | 1 |
| hsa-miR-642a NM_000093 COL5A1  | 1 |
| hsa-miR-644a NM_000093 COL5A1  | 1 |
| hsa-miR-645 NM_000093 COL5A1   | 1 |
| hsa-miR-648 NM_000093 COL5A1   | 1 |
| hsa-miR-1298 NM_000093 COL5A1  | 1 |
| hsa-miR-2113 NM_000093 COL5A1  | 1 |
| hsa-miR-708- NM_000093 COL5A1  | 1 |
| hsa-miR-877- NM_000093 COL5A1  | 1 |
| hsa-miR-887- NM_000093 COL5A1  | 1 |
| hsa-miR-301b NM_000093 COL5A1  | 1 |
| hsa-miR-509- NM_000093 COL5A1  | 1 |
| hsa-miR-936 NM_000093 COL5A1   | 1 |
| hsa-miR-937- NM_000093 COL5A1  | 1 |
| hsa-miR-1236 NM_000093 COL5A1  | 1 |
| hsa-miR-1208 NM_000093 COL5A1  | 1 |
| hsa-miR-1255 NM_000093 COL5A1  | 1 |
| hsa-miR-1276 NM_000093 COL5A1  | 1 |
| hsa-miR-191c NM_000093 COL5A1  | 1 |
| hsa-miR-191c NM_000093 COL5A1  | 1 |
| hsa-miR-1973 NM_000093 COL5A1  | 1 |
| hsa-miR-2115 NM_000093 COL5A1  | 1 |
| hsa-miR-2117 NM_000093 COL5A1  | 1 |
| hsa-miR-2117 NM_000093 COL5A1  | 1 |
| hsa-miR-3121 NM_000093 COL5A1  | 1 |
| hsa-miR-3124 NM_000093 COL5A1  | 1 |
| hsa-miR-3124 NM_000093 COL5A1  | 1 |
| hsa-miR-3126 NM_000093 COL5A1  | 1 |
| hsa-miR-3126 NM_000093 COL5A1  | 1 |
| hsa-miR-3126 NM_000093 COL5A1  | 1 |
| hsa-miR-3155 NM_000093 COL5A1  | 1 |
| hsa-miR-3155 NM_000093 COL5A1  | 1 |
| hsa-miR-3175 NM_000093 COL5A1  | 1 |
| hsa-miR-3177 NM_000093 COL5A1  | 1 |
| hsa-miR-3187 NM_000093 COL5A1  | 1 |
| hsa-miR-3198 NM_000093 COL5A1  | 1 |
| hsa-miR-320c NM_000093 COL5A1  | 1 |
| hsa-miR-3202 NM_000093 COL5A1  | 1 |
| hsa-miR-4265 NM_000093 COL5A1  | 1 |
| hsa-miR-4275 NM_000093 COL5A1  | 1 |
| hsa-miR-3605 NM_000093 COL5A1  | 1 |
| hsa-miR-3622 NM_000093 COL5A1  | 1 |
| hsa-miR-366c NM_000093 COL5A1  | 1 |



|                         |        |            |
|-------------------------|--------|------------|
| hsa-miR-6849 NM_000093  | COL5A1 | 1          |
| hsa-miR-6855 NM_000093  | COL5A1 | 1          |
| hsa-miR-6864 NM_000093  | COL5A1 | 1          |
| hsa-miR-6865 NM_000093  | COL5A1 | 1          |
| hsa-miR-6868 NM_000093  | COL5A1 | 1          |
| hsa-miR-6873 NM_000093  | COL5A1 | 1          |
| hsa-miR-6875 NM_000093  | COL5A1 | 1          |
| hsa-miR-6878 NM_000093  | COL5A1 | 1          |
| hsa-miR-6879 NM_000093  | COL5A1 | 1          |
| hsa-miR-6880 NM_000093  | COL5A1 | 1          |
| hsa-miR-6882 NM_000093  | COL5A1 | 1          |
| hsa-miR-6883 NM_000093  | COL5A1 | 1          |
| hsa-miR-6886 NM_000093  | COL5A1 | 1          |
| hsa-miR-6888 NM_000093  | COL5A1 | 1          |
| hsa-miR-6892 NM_000093  | COL5A1 | 1          |
| hsa-miR-6895 NM_000093  | COL5A1 | 1          |
| hsa-miR-7106 NM_000093  | COL5A1 | 1          |
| hsa-miR-711C NM_000093  | COL5A1 | 1          |
| hsa-miR-711C NM_000093  | COL5A1 | 1          |
| hsa-miR-711C NM_000093  | COL5A1 | 1          |
| hsa-miR-7113 NM_000093  | COL5A1 | 1          |
| hsa-miR-7152 NM_000093  | COL5A1 | 1          |
| hsa-miR-7154 NM_000093  | COL5A1 | 1          |
| hsa-miR-7157 NM_000093  | COL5A1 | 1          |
| hsa-miR-7158 NM_000093  | COL5A1 | 1          |
| hsa-miR-7705 NM_000093  | COL5A1 | 1          |
| hsa-miR-4433 NM_000093  | COL5A1 | 1          |
| hsa-miR-9898 NM_000093  | COL5A1 | 1          |
| hsa-miR-3059 NM_000093  | COL5A1 | 1          |
| hsa-miR-3059 NM_000093  | COL5A1 | 1          |
| hsa-miR-1211 NM_000093  | COL5A1 | 1          |
| hsa-miR-6886 NM_0010976 | FUT3   | 0.95384615 |
| hsa-miR-6502 NM_000149  | FUT3   | 0.96153846 |
| hsa-miR-4682 NM_0010976 | FUT3   | 0.96153846 |
| hsa-miR-6764 NM_0010976 | FUT3   | 0.96153846 |
| hsa-miR-6889 NM_0010976 | FUT3   | 0.96153846 |
| hsa-miR-522- NM_0010976 | FUT3   | 0.96153846 |
| hsa-miR-328- NM_0010976 | FUT3   | 0.96153846 |
| hsa-miR-514t NM_000149  | FUT3   | 0.97435897 |
| hsa-miR-7109 NM_000149  | FUT3   | 0.97435897 |
| hsa-miR-514t NM_0010976 | FUT3   | 0.97435897 |
| hsa-miR-3909 NM_0010976 | FUT3   | 0.97435897 |
| hsa-miR-3909 NM_0010976 | FUT3   | 0.97435897 |
| hsa-miR-1294 NM_000149  | FUT3   | 0.98076923 |
| hsa-miR-450t NM_0010976 | FUT3   | 0.98076923 |
| hsa-miR-4257 NM_0010976 | FUT3   | 0.98076923 |
| hsa-miR-679C NM_0010976 | FUT3   | 0.98076923 |
| hsa-miR-6892 NM_0010976 | FUT3   | 0.98076923 |
| hsa-miR-1285 NM_0010976 | FUT3   | 0.98076923 |
| hsa-miR-4257 NM_0010976 | FUT3   | 0.98076923 |
| hsa-miR-1294 NM_0010976 | FUT3   | 0.98076923 |
| hsa-miR-127- NM_0010976 | FUT3   | 0.98461539 |
| hsa-miR-486- NM_000149  | FUT3   | 0.99145299 |
| hsa-miR-486- NM_0010976 | FUT3   | 0.99145299 |
| hsa-let-7e-3p NM_000149 | FUT3   | 1          |
| hsa-miR-26a- NM_000149  | FUT3   | 1          |
| hsa-miR-30a- NM_000149  | FUT3   | 1          |
| hsa-miR-93-5j NM_000149 | FUT3   | 1          |
| hsa-miR-103a NM_000149  | FUT3   | 1          |
| hsa-miR-129- NM_000149  | FUT3   | 1          |
| hsa-miR-30d- NM_000149  | FUT3   | 1          |
| hsa-miR-139- NM_000149  | FUT3   | 1          |
| hsa-miR-124- NM_000149  | FUT3   | 1          |
| hsa-miR-125t NM_000149  | FUT3   | 1          |
| hsa-miR-130a NM_000149  | FUT3   | 1          |
| hsa-miR-145- NM_000149  | FUT3   | 1          |
| hsa-miR-129- NM_000149  | FUT3   | 1          |
| hsa-miR-188- NM_000149  | FUT3   | 1          |
| hsa-miR-188- NM_000149  | FUT3   | 1          |
| hsa-miR-381- NM_000149  | FUT3   | 1          |
| hsa-miR-337- NM_000149  | FUT3   | 1          |
| hsa-miR-485- NM_000149  | FUT3   | 1          |
| hsa-miR-486- NM_000149  | FUT3   | 1          |
| hsa-miR-517a NM_000149  | FUT3   | 1          |
| hsa-miR-517t NM_000149  | FUT3   | 1          |
| hsa-miR-522- NM_000149  | FUT3   | 1          |
| hsa-miR-500a NM_000149  | FUT3   | 1          |
| hsa-miR-502- NM_000149  | FUT3   | 1          |
| hsa-miR-503- NM_000149  | FUT3   | 1          |
| hsa-miR-455- NM_000149  | FUT3   | 1          |
| hsa-miR-575 NM_000149   | FUT3   | 1          |
| hsa-miR-595 NM_000149   | FUT3   | 1          |
| hsa-miR-615- NM_000149  | FUT3   | 1          |
| hsa-miR-619- NM_000149  | FUT3   | 1          |
| hsa-miR-621 NM_000149   | FUT3   | 1          |
| hsa-miR-645 NM_000149   | FUT3   | 1          |
| hsa-miR-659- NM_000149  | FUT3   | 1          |
| hsa-miR-767- NM_000149  | FUT3   | 1          |
| hsa-miR-1271 NM_000149  | FUT3   | 1          |
| hsa-miR-449c NM_000149  | FUT3   | 1          |
| hsa-miR-670- NM_000149  | FUT3   | 1          |
| hsa-miR-450t NM_000149  | FUT3   | 1          |
| hsa-miR-875- NM_000149  | FUT3   | 1          |
| hsa-miR-147t NM_000149  | FUT3   | 1          |

|              |           |      |   |
|--------------|-----------|------|---|
| hsa-miR-887- | NM_000149 | FUT3 | 1 |
| hsa-miR-665  | NM_000149 | FUT3 | 1 |
| hsa-miR-374b | NM_000149 | FUT3 | 1 |
| hsa-miR-1233 | NM_000149 | FUT3 | 1 |
| hsa-miR-1207 | NM_000149 | FUT3 | 1 |
| hsa-miR-1208 | NM_000149 | FUT3 | 1 |
| hsa-miR-1303 | NM_000149 | FUT3 | 1 |
| hsa-miR-1265 | NM_000149 | FUT3 | 1 |
| hsa-miR-1266 | NM_000149 | FUT3 | 1 |
| hsa-miR-1292 | NM_000149 | FUT3 | 1 |
| hsa-miR-1538 | NM_000149 | FUT3 | 1 |
| hsa-miR-1539 | NM_000149 | FUT3 | 1 |
| hsa-miR-1976 | NM_000149 | FUT3 | 1 |
| hsa-miR-2116 | NM_000149 | FUT3 | 1 |
| hsa-miR-2116 | NM_000149 | FUT3 | 1 |
| hsa-miR-2116 | NM_000149 | FUT3 | 1 |
| hsa-miR-3124 | NM_000149 | FUT3 | 1 |
| hsa-miR-3130 | NM_000149 | FUT3 | 1 |
| hsa-miR-3135 | NM_000149 | FUT3 | 1 |
| hsa-miR-3074 | NM_000149 | FUT3 | 1 |
| hsa-miR-3170 | NM_000149 | FUT3 | 1 |
| hsa-miR-3184 | NM_000149 | FUT3 | 1 |
| hsa-miR-4302 | NM_000149 | FUT3 | 1 |
| hsa-miR-4281 | NM_000149 | FUT3 | 1 |
| hsa-miR-500b | NM_000149 | FUT3 | 1 |
| hsa-miR-500c | NM_000149 | FUT3 | 1 |
| hsa-miR-3615 | NM_000149 | FUT3 | 1 |
| hsa-miR-3621 | NM_000149 | FUT3 | 1 |
| hsa-miR-3622 | NM_000149 | FUT3 | 1 |
| hsa-miR-3675 | NM_000149 | FUT3 | 1 |
| hsa-miR-3685 | NM_000149 | FUT3 | 1 |
| hsa-miR-3150 | NM_000149 | FUT3 | 1 |
| hsa-miR-378g | NM_000149 | FUT3 | 1 |
| hsa-miR-4442 | NM_000149 | FUT3 | 1 |
| hsa-miR-4452 | NM_000149 | FUT3 | 1 |
| hsa-miR-4454 | NM_000149 | FUT3 | 1 |
| hsa-miR-4474 | NM_000149 | FUT3 | 1 |
| hsa-miR-4483 | NM_000149 | FUT3 | 1 |
| hsa-miR-4488 | NM_000149 | FUT3 | 1 |
| hsa-miR-4506 | NM_000149 | FUT3 | 1 |
| hsa-miR-4531 | NM_000149 | FUT3 | 1 |
| hsa-miR-4534 | NM_000149 | FUT3 | 1 |
| hsa-miR-4538 | NM_000149 | FUT3 | 1 |
| hsa-miR-4633 | NM_000149 | FUT3 | 1 |
| hsa-miR-4645 | NM_000149 | FUT3 | 1 |
| hsa-miR-4652 | NM_000149 | FUT3 | 1 |
| hsa-miR-4660 | NM_000149 | FUT3 | 1 |
| hsa-miR-4665 | NM_000149 | FUT3 | 1 |
| hsa-miR-4682 | NM_000149 | FUT3 | 1 |
| hsa-miR-4690 | NM_000149 | FUT3 | 1 |
| hsa-miR-4695 | NM_000149 | FUT3 | 1 |
| hsa-miR-4708 | NM_000149 | FUT3 | 1 |
| hsa-miR-4723 | NM_000149 | FUT3 | 1 |
| hsa-miR-4732 | NM_000149 | FUT3 | 1 |
| hsa-miR-4745 | NM_000149 | FUT3 | 1 |
| hsa-miR-4753 | NM_000149 | FUT3 | 1 |
| hsa-miR-371b | NM_000149 | FUT3 | 1 |
| hsa-miR-499b | NM_000149 | FUT3 | 1 |
| hsa-miR-4757 | NM_000149 | FUT3 | 1 |
| hsa-miR-4768 | NM_000149 | FUT3 | 1 |
| hsa-miR-4768 | NM_000149 | FUT3 | 1 |
| hsa-miR-4772 | NM_000149 | FUT3 | 1 |
| hsa-miR-4774 | NM_000149 | FUT3 | 1 |
| hsa-miR-5085 | NM_000149 | FUT3 | 1 |
| hsa-miR-5193 | NM_000149 | FUT3 | 1 |
| hsa-miR-5581 | NM_000149 | FUT3 | 1 |
| hsa-miR-5584 | NM_000149 | FUT3 | 1 |
| hsa-miR-5587 | NM_000149 | FUT3 | 1 |
| hsa-miR-5692 | NM_000149 | FUT3 | 1 |
| hsa-miR-6075 | NM_000149 | FUT3 | 1 |
| hsa-miR-6085 | NM_000149 | FUT3 | 1 |
| hsa-miR-6088 | NM_000149 | FUT3 | 1 |
| hsa-miR-6126 | NM_000149 | FUT3 | 1 |
| hsa-miR-6133 | NM_000149 | FUT3 | 1 |
| hsa-miR-6495 | NM_000149 | FUT3 | 1 |
| hsa-miR-6504 | NM_000149 | FUT3 | 1 |
| hsa-miR-6505 | NM_000149 | FUT3 | 1 |
| hsa-miR-6726 | NM_000149 | FUT3 | 1 |
| hsa-miR-6736 | NM_000149 | FUT3 | 1 |
| hsa-miR-6736 | NM_000149 | FUT3 | 1 |
| hsa-miR-6738 | NM_000149 | FUT3 | 1 |
| hsa-miR-6739 | NM_000149 | FUT3 | 1 |
| hsa-miR-6754 | NM_000149 | FUT3 | 1 |
| hsa-miR-6756 | NM_000149 | FUT3 | 1 |
| hsa-miR-6773 | NM_000149 | FUT3 | 1 |
| hsa-miR-6794 | NM_000149 | FUT3 | 1 |
| hsa-miR-6794 | NM_000149 | FUT3 | 1 |
| hsa-miR-6814 | NM_000149 | FUT3 | 1 |
| hsa-miR-6817 | NM_000149 | FUT3 | 1 |
| hsa-miR-6818 | NM_000149 | FUT3 | 1 |
| hsa-miR-6833 | NM_000149 | FUT3 | 1 |
| hsa-miR-6838 | NM_000149 | FUT3 | 1 |
| hsa-miR-6848 | NM_000149 | FUT3 | 1 |
| hsa-miR-6852 | NM_000149 | FUT3 | 1 |



|                           |      |   |
|---------------------------|------|---|
| hsa-miR-6852 NM_000149    | FUT3 | 1 |
| hsa-miR-6765 NM_000149    | FUT3 | 1 |
| hsa-miR-6861 NM_000149    | FUT3 | 1 |
| hsa-miR-6873 NM_000149    | FUT3 | 1 |
| hsa-miR-6877 NM_000149    | FUT3 | 1 |
| hsa-miR-6881 NM_000149    | FUT3 | 1 |
| hsa-miR-6886 NM_000149    | FUT3 | 1 |
| hsa-miR-6889 NM_000149    | FUT3 | 1 |
| hsa-miR-6893 NM_000149    | FUT3 | 1 |
| hsa-miR-7106 NM_000149    | FUT3 | 1 |
| hsa-miR-7111 NM_000149    | FUT3 | 1 |
| hsa-miR-7113 NM_000149    | FUT3 | 1 |
| hsa-miR-7114 NM_000149    | FUT3 | 1 |
| hsa-miR-8076 NM_000149    | FUT3 | 1 |
| hsa-miR-8085 NM_000149    | FUT3 | 1 |
| hsa-miR-8088 NM_000149    | FUT3 | 1 |
| hsa-miR-114C NM_000149    | FUT3 | 1 |
| hsa-miR-3055 NM_000149    | FUT3 | 1 |
| hsa-miR-1212 NM_000149    | FUT3 | 1 |
| hsa-let-7e-3p NM_0010976  | FUT3 | 1 |
| hsa-miR-16-1- NM_0010976  | FUT3 | 1 |
| hsa-miR-23a-1- NM_0010976 | FUT3 | 1 |
| hsa-miR-92a-1- NM_0010976 | FUT3 | 1 |
| hsa-miR-93-5j NM_0010976  | FUT3 | 1 |
| hsa-miR-103a NM_0010976   | FUT3 | 1 |
| hsa-miR-198 NM_0010976    | FUT3 | 1 |
| hsa-miR-129-1 NM_0010976  | FUT3 | 1 |
| hsa-miR-129-2 NM_0010976  | FUT3 | 1 |
| hsa-miR-139-1 NM_0010976  | FUT3 | 1 |
| hsa-miR-181a NM_0010976   | FUT3 | 1 |
| hsa-miR-212-1 NM_0010976  | FUT3 | 1 |
| hsa-miR-125b NM_0010976   | FUT3 | 1 |
| hsa-miR-137-1 NM_0010976  | FUT3 | 1 |
| hsa-miR-125a NM_0010976   | FUT3 | 1 |
| hsa-miR-125a-1 NM_0010976 | FUT3 | 1 |
| hsa-miR-30c-1 NM_0010976  | FUT3 | 1 |
| hsa-miR-365a NM_0010976   | FUT3 | 1 |
| hsa-miR-337-1 NM_0010976  | FUT3 | 1 |
| hsa-miR-486-1 NM_0010976  | FUT3 | 1 |
| hsa-miR-490-1 NM_0010976  | FUT3 | 1 |
| hsa-miR-512-1 NM_0010976  | FUT3 | 1 |
| hsa-miR-517a NM_0010976   | FUT3 | 1 |
| hsa-miR-517b NM_0010976   | FUT3 | 1 |
| hsa-miR-522-1 NM_0010976  | FUT3 | 1 |
| hsa-miR-499a NM_0010976   | FUT3 | 1 |
| hsa-miR-500a NM_0010976   | FUT3 | 1 |
| hsa-miR-574-1 NM_0010976  | FUT3 | 1 |
| hsa-miR-575 NM_0010976    | FUT3 | 1 |
| hsa-miR-595 NM_0010976    | FUT3 | 1 |
| hsa-miR-598-1 NM_0010976  | FUT3 | 1 |
| hsa-miR-615-1 NM_0010976  | FUT3 | 1 |
| hsa-miR-619-1 NM_0010976  | FUT3 | 1 |
| hsa-miR-645 NM_0010976    | FUT3 | 1 |
| hsa-miR-659-1 NM_0010976  | FUT3 | 1 |
| hsa-miR-767-1 NM_0010976  | FUT3 | 1 |
| hsa-miR-1224 NM_0010976   | FUT3 | 1 |
| hsa-miR-1271 NM_0010976   | FUT3 | 1 |
| hsa-miR-1301 NM_0010976   | FUT3 | 1 |
| hsa-miR-769-1 NM_0010976  | FUT3 | 1 |
| hsa-miR-675-1 NM_0010976  | FUT3 | 1 |
| hsa-miR-875-1 NM_0010976  | FUT3 | 1 |
| hsa-miR-887-1 NM_0010976  | FUT3 | 1 |
| hsa-miR-1207 NM_0010976   | FUT3 | 1 |
| hsa-miR-1285 NM_0010976   | FUT3 | 1 |
| hsa-miR-1303 NM_0010976   | FUT3 | 1 |
| hsa-miR-1260 NM_0010976   | FUT3 | 1 |
| hsa-miR-1265 NM_0010976   | FUT3 | 1 |
| hsa-miR-1909 NM_0010976   | FUT3 | 1 |
| hsa-miR-191C NM_0010976   | FUT3 | 1 |
| hsa-miR-1976 NM_0010976   | FUT3 | 1 |
| hsa-miR-2116 NM_0010976   | FUT3 | 1 |
| hsa-miR-2116-1 NM_0010976 | FUT3 | 1 |
| hsa-miR-313C NM_0010976   | FUT3 | 1 |
| hsa-miR-3183 NM_0010976   | FUT3 | 1 |
| hsa-miR-3184 NM_0010976   | FUT3 | 1 |
| hsa-miR-2355 NM_0010976   | FUT3 | 1 |
| hsa-miR-4281 NM_0010976   | FUT3 | 1 |
| hsa-miR-500b NM_0010976   | FUT3 | 1 |
| hsa-miR-500c NM_0010976   | FUT3 | 1 |
| hsa-miR-3619 NM_0010976   | FUT3 | 1 |
| hsa-miR-3621 NM_0010976   | FUT3 | 1 |
| hsa-miR-3622 NM_0010976   | FUT3 | 1 |
| hsa-miR-3675 NM_0010976   | FUT3 | 1 |
| hsa-miR-3682 NM_0010976   | FUT3 | 1 |
| hsa-miR-3150 NM_0010976   | FUT3 | 1 |
| hsa-miR-676-1 NM_0010976  | FUT3 | 1 |
| hsa-miR-4442 NM_0010976   | FUT3 | 1 |
| hsa-miR-4452 NM_0010976   | FUT3 | 1 |
| hsa-miR-4474 NM_0010976   | FUT3 | 1 |
| hsa-miR-4483 NM_0010976   | FUT3 | 1 |
| hsa-miR-4488 NM_0010976   | FUT3 | 1 |
| hsa-miR-4531 NM_0010976   | FUT3 | 1 |
| hsa-miR-4538 NM_0010976   | FUT3 | 1 |
| hsa-miR-4633 NM_0010976   | FUT3 | 1 |

|                               |   |
|-------------------------------|---|
| hsa-miR-4649 NM_0010976 FUT3  | 1 |
| hsa-miR-4652 NM_0010976 FUT3  | 1 |
| hsa-miR-4665 NM_0010976 FUT3  | 1 |
| hsa-miR-4675 NM_0010976 FUT3  | 1 |
| hsa-miR-4695 NM_0010976 FUT3  | 1 |
| hsa-miR-4708 NM_0010976 FUT3  | 1 |
| hsa-miR-4721 NM_0010976 FUT3  | 1 |
| hsa-miR-4723 NM_0010976 FUT3  | 1 |
| hsa-miR-4728 NM_0010976 FUT3  | 1 |
| hsa-miR-4745 NM_0010976 FUT3  | 1 |
| hsa-miR-4753 NM_0010976 FUT3  | 1 |
| hsa-miR-371b NM_0010976 FUT3  | 1 |
| hsa-miR-4755 NM_0010976 FUT3  | 1 |
| hsa-miR-4767 NM_0010976 FUT3  | 1 |
| hsa-miR-4772 NM_0010976 FUT3  | 1 |
| hsa-miR-5196 NM_0010976 FUT3  | 1 |
| hsa-miR-5581 NM_0010976 FUT3  | 1 |
| hsa-miR-5581 NM_0010976 FUT3  | 1 |
| hsa-miR-5581 NM_0010976 FUT3  | 1 |
| hsa-miR-5584 NM_0010976 FUT3  | 1 |
| hsa-miR-5691 NM_0010976 FUT3  | 1 |
| hsa-miR-6075 NM_0010976 FUT3  | 1 |
| hsa-miR-6131 NM_0010976 FUT3  | 1 |
| hsa-miR-6495 NM_0010976 FUT3  | 1 |
| hsa-miR-6502 NM_0010976 FUT3  | 1 |
| hsa-miR-6726 NM_0010976 FUT3  | 1 |
| hsa-miR-6736 NM_0010976 FUT3  | 1 |
| hsa-miR-6738 NM_0010976 FUT3  | 1 |
| hsa-miR-6739 NM_0010976 FUT3  | 1 |
| hsa-miR-6753 NM_0010976 FUT3  | 1 |
| hsa-miR-6756 NM_0010976 FUT3  | 1 |
| hsa-miR-6770 NM_0010976 FUT3  | 1 |
| hsa-miR-6773 NM_0010976 FUT3  | 1 |
| hsa-miR-6781 NM_0010976 FUT3  | 1 |
| hsa-miR-6784 NM_0010976 FUT3  | 1 |
| hsa-miR-6794 NM_0010976 FUT3  | 1 |
| hsa-miR-6794 NM_0010976 FUT3  | 1 |
| hsa-miR-6812 NM_0010976 FUT3  | 1 |
| hsa-miR-6814 NM_0010976 FUT3  | 1 |
| hsa-miR-6817 NM_0010976 FUT3  | 1 |
| hsa-miR-6818 NM_0010976 FUT3  | 1 |
| hsa-miR-6819 NM_0010976 FUT3  | 1 |
| hsa-miR-6830 NM_0010976 FUT3  | 1 |
| hsa-miR-6833 NM_0010976 FUT3  | 1 |
| hsa-miR-6833 NM_0010976 FUT3  | 1 |
| hsa-miR-6780 NM_0010976 FUT3  | 1 |
| hsa-miR-6838 NM_0010976 FUT3  | 1 |
| hsa-miR-6848 NM_0010976 FUT3  | 1 |
| hsa-miR-6851 NM_0010976 FUT3  | 1 |
| hsa-miR-6856 NM_0010976 FUT3  | 1 |
| hsa-miR-6861 NM_0010976 FUT3  | 1 |
| hsa-miR-6872 NM_0010976 FUT3  | 1 |
| hsa-miR-6873 NM_0010976 FUT3  | 1 |
| hsa-miR-6875 NM_0010976 FUT3  | 1 |
| hsa-miR-6891 NM_0010976 FUT3  | 1 |
| hsa-miR-6893 NM_0010976 FUT3  | 1 |
| hsa-miR-7106 NM_0010976 FUT3  | 1 |
| hsa-miR-7110 NM_0010976 FUT3  | 1 |
| hsa-miR-7113 NM_0010976 FUT3  | 1 |
| hsa-miR-7162 NM_0010976 FUT3  | 1 |
| hsa-miR-7162 NM_0010976 FUT3  | 1 |
| hsa-miR-7851 NM_0010976 FUT3  | 1 |
| hsa-miR-7855 NM_0010976 FUT3  | 1 |
| hsa-miR-8072 NM_0010976 FUT3  | 1 |
| hsa-miR-8073 NM_0010976 FUT3  | 1 |
| hsa-miR-8076 NM_0010976 FUT3  | 1 |
| hsa-miR-1039 NM_0010976 FUT3  | 1 |
| hsa-miR-1040 NM_0010976 FUT3  | 1 |
| hsa-miR-3059 NM_0010976 FUT3  | 1 |
| hsa-miR-3059 NM_0010976 FUT3  | 1 |
| hsa-let-7e-3p NM_0010976 FUT3 | 1 |
| hsa-miR-22-5j NM_0010976 FUT3 | 1 |
| hsa-miR-23a- NM_0010976 FUT3  | 1 |
| hsa-miR-103a NM_0010976 FUT3  | 1 |
| hsa-miR-208a NM_0010976 FUT3  | 1 |
| hsa-miR-208a NM_0010976 FUT3  | 1 |
| hsa-miR-129- NM_0010976 FUT3  | 1 |
| hsa-miR-30d- NM_0010976 FUT3  | 1 |
| hsa-miR-139- NM_0010976 FUT3  | 1 |
| hsa-miR-187- NM_0010976 FUT3  | 1 |
| hsa-miR-212- NM_0010976 FUT3  | 1 |
| hsa-miR-214- NM_0010976 FUT3  | 1 |
| hsa-miR-23b- NM_0010976 FUT3  | 1 |
| hsa-miR-27b- NM_0010976 FUT3  | 1 |
| hsa-miR-125b NM_0010976 FUT3  | 1 |
| hsa-miR-137- NM_0010976 FUT3  | 1 |
| hsa-miR-145- NM_0010976 FUT3  | 1 |
| hsa-miR-125a NM_0010976 FUT3  | 1 |
| hsa-miR-188- NM_0010976 FUT3  | 1 |
| hsa-miR-200c NM_0010976 FUT3  | 1 |
| hsa-miR-30c- NM_0010976 FUT3  | 1 |
| hsa-miR-381- NM_0010976 FUT3  | 1 |
| hsa-miR-485- NM_0010976 FUT3  | 1 |
| hsa-miR-486- NM_0010976 FUT3  | 1 |
| hsa-miR-517a NM_0010976 FUT3  | 1 |

|              |            |      |   |
|--------------|------------|------|---|
| hsa-miR-517b | NM_0010976 | FUT3 | 1 |
| hsa-miR-499a | NM_0010976 | FUT3 | 1 |
| hsa-miR-500a | NM_0010976 | FUT3 | 1 |
| hsa-miR-502- | NM_0010976 | FUT3 | 1 |
| hsa-miR-564  | NM_0010976 | FUT3 | 1 |
| hsa-miR-595  | NM_0010976 | FUT3 | 1 |
| hsa-miR-598- | NM_0010976 | FUT3 | 1 |
| hsa-miR-600  | NM_0010976 | FUT3 | 1 |
| hsa-miR-615- | NM_0010976 | FUT3 | 1 |
| hsa-miR-619- | NM_0010976 | FUT3 | 1 |
| hsa-miR-621  | NM_0010976 | FUT3 | 1 |
| hsa-miR-33b- | NM_0010976 | FUT3 | 1 |
| hsa-miR-644a | NM_0010976 | FUT3 | 1 |
| hsa-miR-645  | NM_0010976 | FUT3 | 1 |
| hsa-miR-659- | NM_0010976 | FUT3 | 1 |
| hsa-miR-767- | NM_0010976 | FUT3 | 1 |
| hsa-miR-1271 | NM_0010976 | FUT3 | 1 |
| hsa-miR-670- | NM_0010976 | FUT3 | 1 |
| hsa-miR-888- | NM_0010976 | FUT3 | 1 |
| hsa-miR-875- | NM_0010976 | FUT3 | 1 |
| hsa-miR-887- | NM_0010976 | FUT3 | 1 |
| hsa-miR-1233 | NM_0010976 | FUT3 | 1 |
| hsa-miR-1207 | NM_0010976 | FUT3 | 1 |
| hsa-miR-1303 | NM_0010976 | FUT3 | 1 |
| hsa-miR-1260 | NM_0010976 | FUT3 | 1 |
| hsa-miR-1265 | NM_0010976 | FUT3 | 1 |
| hsa-miR-1292 | NM_0010976 | FUT3 | 1 |
| hsa-miR-1976 | NM_0010976 | FUT3 | 1 |
| hsa-miR-2116 | NM_0010976 | FUT3 | 1 |
| hsa-miR-2909 | NM_0010976 | FUT3 | 1 |
| hsa-miR-3124 | NM_0010976 | FUT3 | 1 |
| hsa-miR-3130 | NM_0010976 | FUT3 | 1 |
| hsa-miR-3139 | NM_0010976 | FUT3 | 1 |
| hsa-miR-3170 | NM_0010976 | FUT3 | 1 |
| hsa-miR-3170 | NM_0010976 | FUT3 | 1 |
| hsa-miR-3170 | NM_0010976 | FUT3 | 1 |
| hsa-miR-3184 | NM_0010976 | FUT3 | 1 |
| hsa-miR-3187 | NM_0010976 | FUT3 | 1 |
| hsa-miR-3192 | NM_0010976 | FUT3 | 1 |
| hsa-miR-3194 | NM_0010976 | FUT3 | 1 |
| hsa-miR-4302 | NM_0010976 | FUT3 | 1 |
| hsa-miR-2355 | NM_0010976 | FUT3 | 1 |
| hsa-miR-4281 | NM_0010976 | FUT3 | 1 |
| hsa-miR-4286 | NM_0010976 | FUT3 | 1 |
| hsa-miR-500b | NM_0010976 | FUT3 | 1 |
| hsa-miR-3615 | NM_0010976 | FUT3 | 1 |
| hsa-miR-3619 | NM_0010976 | FUT3 | 1 |
| hsa-miR-3621 | NM_0010976 | FUT3 | 1 |
| hsa-miR-3621 | NM_0010976 | FUT3 | 1 |
| hsa-miR-3650 | NM_0010976 | FUT3 | 1 |
| hsa-miR-3150 | NM_0010976 | FUT3 | 1 |
| hsa-miR-676- | NM_0010976 | FUT3 | 1 |
| hsa-miR-378g | NM_0010976 | FUT3 | 1 |
| hsa-miR-4435 | NM_0010976 | FUT3 | 1 |
| hsa-miR-4452 | NM_0010976 | FUT3 | 1 |
| hsa-miR-4474 | NM_0010976 | FUT3 | 1 |
| hsa-miR-4483 | NM_0010976 | FUT3 | 1 |
| hsa-miR-4502 | NM_0010976 | FUT3 | 1 |
| hsa-miR-4531 | NM_0010976 | FUT3 | 1 |
| hsa-miR-4534 | NM_0010976 | FUT3 | 1 |
| hsa-miR-4538 | NM_0010976 | FUT3 | 1 |
| hsa-miR-4633 | NM_0010976 | FUT3 | 1 |
| hsa-miR-4645 | NM_0010976 | FUT3 | 1 |
| hsa-miR-4650 | NM_0010976 | FUT3 | 1 |
| hsa-miR-4652 | NM_0010976 | FUT3 | 1 |
| hsa-miR-4658 | NM_0010976 | FUT3 | 1 |
| hsa-miR-1343 | NM_0010976 | FUT3 | 1 |
| hsa-miR-4707 | NM_0010976 | FUT3 | 1 |
| hsa-miR-4723 | NM_0010976 | FUT3 | 1 |
| hsa-miR-4728 | NM_0010976 | FUT3 | 1 |
| hsa-miR-4740 | NM_0010976 | FUT3 | 1 |
| hsa-miR-4749 | NM_0010976 | FUT3 | 1 |
| hsa-miR-4753 | NM_0010976 | FUT3 | 1 |
| hsa-miR-371b | NM_0010976 | FUT3 | 1 |
| hsa-miR-499b | NM_0010976 | FUT3 | 1 |
| hsa-miR-4768 | NM_0010976 | FUT3 | 1 |
| hsa-miR-4772 | NM_0010976 | FUT3 | 1 |
| hsa-miR-5004 | NM_0010976 | FUT3 | 1 |
| hsa-miR-5085 | NM_0010976 | FUT3 | 1 |
| hsa-miR-5581 | NM_0010976 | FUT3 | 1 |
| hsa-miR-5581 | NM_0010976 | FUT3 | 1 |
| hsa-miR-5691 | NM_0010976 | FUT3 | 1 |
| hsa-miR-5692 | NM_0010976 | FUT3 | 1 |
| hsa-miR-6075 | NM_0010976 | FUT3 | 1 |
| hsa-miR-6131 | NM_0010976 | FUT3 | 1 |
| hsa-miR-6495 | NM_0010976 | FUT3 | 1 |
| hsa-miR-6500 | NM_0010976 | FUT3 | 1 |
| hsa-miR-6503 | NM_0010976 | FUT3 | 1 |
| hsa-miR-6504 | NM_0010976 | FUT3 | 1 |
| hsa-miR-6505 | NM_0010976 | FUT3 | 1 |
| hsa-miR-6511 | NM_0010976 | FUT3 | 1 |
| hsa-miR-6718 | NM_0010976 | FUT3 | 1 |
| hsa-miR-6726 | NM_0010976 | FUT3 | 1 |
| hsa-miR-6728 | NM_0010976 | FUT3 | 1 |
| hsa-miR-6733 | NM_0010976 | FUT3 | 1 |

|                               |   |
|-------------------------------|---|
| hsa-miR-6736 NM_0010976 FUT3  | 1 |
| hsa-miR-6736 NM_0010976 FUT3  | 1 |
| hsa-miR-6738 NM_0010976 FUT3  | 1 |
| hsa-miR-6738 NM_0010976 FUT3  | 1 |
| hsa-miR-6753 NM_0010976 FUT3  | 1 |
| hsa-miR-6763 NM_0010976 FUT3  | 1 |
| hsa-miR-6773 NM_0010976 FUT3  | 1 |
| hsa-miR-6813 NM_0010976 FUT3  | 1 |
| hsa-miR-6814 NM_0010976 FUT3  | 1 |
| hsa-miR-6817 NM_0010976 FUT3  | 1 |
| hsa-miR-6818 NM_0010976 FUT3  | 1 |
| hsa-miR-6838 NM_0010976 FUT3  | 1 |
| hsa-miR-6852 NM_0010976 FUT3  | 1 |
| hsa-miR-6852 NM_0010976 FUT3  | 1 |
| hsa-miR-687C NM_0010976 FUT3  | 1 |
| hsa-miR-6873 NM_0010976 FUT3  | 1 |
| hsa-miR-6875 NM_0010976 FUT3  | 1 |
| hsa-miR-6881 NM_0010976 FUT3  | 1 |
| hsa-miR-6893 NM_0010976 FUT3  | 1 |
| hsa-miR-6894 NM_0010976 FUT3  | 1 |
| hsa-miR-6895 NM_0010976 FUT3  | 1 |
| hsa-miR-7113 NM_0010976 FUT3  | 1 |
| hsa-miR-7851 NM_0010976 FUT3  | 1 |
| hsa-miR-7855 NM_0010976 FUT3  | 1 |
| hsa-miR-7974 NM_0010976 FUT3  | 1 |
| hsa-miR-8076 NM_0010976 FUT3  | 1 |
| hsa-miR-9718 NM_0010976 FUT3  | 1 |
| hsa-miR-1039 NM_0010976 FUT3  | 1 |
| hsa-miR-104C NM_0010976 FUT3  | 1 |
| hsa-miR-114C NM_0010976 FUT3  | 1 |
| hsa-miR-3059 NM_0010976 FUT3  | 1 |
| hsa-miR-3059 NM_0010976 FUT3  | 1 |
| hsa-miR-23a- NM_0010976 FUT3  | 1 |
| hsa-miR-27a- NM_0010976 FUT3  | 1 |
| hsa-miR-93-5j NM_0010976 FUT3 | 1 |
| hsa-miR-105- NM_0010976 FUT3  | 1 |
| hsa-miR-30d- NM_0010976 FUT3  | 1 |
| hsa-miR-139- NM_0010976 FUT3  | 1 |
| hsa-miR-181a NM_0010976 FUT3  | 1 |
| hsa-miR-181c NM_0010976 FUT3  | 1 |
| hsa-miR-210- NM_0010976 FUT3  | 1 |
| hsa-miR-211- NM_0010976 FUT3  | 1 |
| hsa-miR-212- NM_0010976 FUT3  | 1 |
| hsa-miR-181a NM_0010976 FUT3  | 1 |
| hsa-miR-214- NM_0010976 FUT3  | 1 |
| hsa-miR-137- NM_0010976 FUT3  | 1 |
| hsa-miR-145- NM_0010976 FUT3  | 1 |
| hsa-miR-125a NM_0010976 FUT3  | 1 |
| hsa-miR-188- NM_0010976 FUT3  | 1 |
| hsa-miR-193a NM_0010976 FUT3  | 1 |
| hsa-miR-200c NM_0010976 FUT3  | 1 |
| hsa-miR-99b- NM_0010976 FUT3  | 1 |
| hsa-miR-337- NM_0010976 FUT3  | 1 |
| hsa-miR-485- NM_0010976 FUT3  | 1 |
| hsa-miR-486- NM_0010976 FUT3  | 1 |
| hsa-miR-490- NM_0010976 FUT3  | 1 |
| hsa-miR-512- NM_0010976 FUT3  | 1 |
| hsa-miR-517a NM_0010976 FUT3  | 1 |
| hsa-miR-517b NM_0010976 FUT3  | 1 |
| hsa-miR-500a NM_0010976 FUT3  | 1 |
| hsa-miR-513a NM_0010976 FUT3  | 1 |
| hsa-miR-588 NM_0010976 FUT3   | 1 |
| hsa-miR-550a NM_0010976 FUT3  | 1 |
| hsa-miR-595 NM_0010976 FUT3   | 1 |
| hsa-miR-619- NM_0010976 FUT3  | 1 |
| hsa-miR-621 NM_0010976 FUT3   | 1 |
| hsa-miR-33b- NM_0010976 FUT3  | 1 |
| hsa-miR-644a NM_0010976 FUT3  | 1 |
| hsa-miR-645 NM_0010976 FUT3   | 1 |
| hsa-miR-658 NM_0010976 FUT3   | 1 |
| hsa-miR-767- NM_0010976 FUT3  | 1 |
| hsa-miR-1271 NM_0010976 FUT3  | 1 |
| hsa-miR-1301 NM_0010976 FUT3  | 1 |
| hsa-miR-675- NM_0010976 FUT3  | 1 |
| hsa-miR-888- NM_0010976 FUT3  | 1 |
| hsa-miR-887- NM_0010976 FUT3  | 1 |
| hsa-miR-374b NM_0010976 FUT3  | 1 |
| hsa-miR-939- NM_0010976 FUT3  | 1 |
| hsa-miR-1229 NM_0010976 FUT3  | 1 |
| hsa-miR-1229 NM_0010976 FUT3  | 1 |
| hsa-miR-1207 NM_0010976 FUT3  | 1 |
| hsa-miR-1285 NM_0010976 FUT3  | 1 |
| hsa-miR-1303 NM_0010976 FUT3  | 1 |
| hsa-miR-1265 NM_0010976 FUT3  | 1 |
| hsa-miR-1471 NM_0010976 FUT3  | 1 |
| hsa-miR-191C NM_0010976 FUT3  | 1 |
| hsa-miR-1976 NM_0010976 FUT3  | 1 |
| hsa-miR-2116 NM_0010976 FUT3  | 1 |
| hsa-miR-3124 NM_0010976 FUT3  | 1 |
| hsa-miR-3130 NM_0010976 FUT3  | 1 |
| hsa-miR-3131 NM_0010976 FUT3  | 1 |
| hsa-miR-3151 NM_0010976 FUT3  | 1 |
| hsa-miR-3159 NM_0010976 FUT3  | 1 |
| hsa-miR-317C NM_0010976 FUT3  | 1 |

|                              |   |
|------------------------------|---|
| hsa-miR-3184 NM_0010976 FUT3 | 1 |
| hsa-miR-3184 NM_0010976 FUT3 | 1 |
| hsa-miR-3065 NM_0010976 FUT3 | 1 |
| hsa-miR-3187 NM_0010976 FUT3 | 1 |
| hsa-miR-4302 NM_0010976 FUT3 | 1 |
| hsa-miR-4257 NM_0010976 FUT3 | 1 |
| hsa-miR-2355 NM_0010976 FUT3 | 1 |
| hsa-miR-500t NM_0010976 FUT3 | 1 |
| hsa-miR-500t NM_0010976 FUT3 | 1 |
| hsa-miR-3615 NM_0010976 FUT3 | 1 |
| hsa-miR-3619 NM_0010976 FUT3 | 1 |
| hsa-miR-3621 NM_0010976 FUT3 | 1 |
| hsa-miR-3622 NM_0010976 FUT3 | 1 |
| hsa-miR-3670 NM_0010976 FUT3 | 1 |
| hsa-miR-3680 NM_0010976 FUT3 | 1 |
| hsa-miR-3917 NM_0010976 FUT3 | 1 |
| hsa-miR-3922 NM_0010976 FUT3 | 1 |
| hsa-miR-4435 NM_0010976 FUT3 | 1 |
| hsa-miR-4437 NM_0010976 FUT3 | 1 |
| hsa-miR-4442 NM_0010976 FUT3 | 1 |
| hsa-miR-4452 NM_0010976 FUT3 | 1 |
| hsa-miR-4454 NM_0010976 FUT3 | 1 |
| hsa-miR-4483 NM_0010976 FUT3 | 1 |
| hsa-miR-4488 NM_0010976 FUT3 | 1 |
| hsa-miR-4510 NM_0010976 FUT3 | 1 |
| hsa-miR-4513 NM_0010976 FUT3 | 1 |
| hsa-miR-4538 NM_0010976 FUT3 | 1 |
| hsa-miR-4633 NM_0010976 FUT3 | 1 |
| hsa-miR-4633 NM_0010976 FUT3 | 1 |
| hsa-miR-4633 NM_0010976 FUT3 | 1 |
| hsa-miR-4649 NM_0010976 FUT3 | 1 |
| hsa-miR-4650 NM_0010976 FUT3 | 1 |
| hsa-miR-4665 NM_0010976 FUT3 | 1 |
| hsa-miR-4681 NM_0010976 FUT3 | 1 |
| hsa-miR-4682 NM_0010976 FUT3 | 1 |
| hsa-miR-1343 NM_0010976 FUT3 | 1 |
| hsa-miR-4695 NM_0010976 FUT3 | 1 |
| hsa-miR-4721 NM_0010976 FUT3 | 1 |
| hsa-miR-4723 NM_0010976 FUT3 | 1 |
| hsa-miR-4728 NM_0010976 FUT3 | 1 |
| hsa-miR-4730 NM_0010976 FUT3 | 1 |
| hsa-miR-4749 NM_0010976 FUT3 | 1 |
| hsa-miR-499t NM_0010976 FUT3 | 1 |
| hsa-miR-499t NM_0010976 FUT3 | 1 |
| hsa-miR-4768 NM_0010976 FUT3 | 1 |
| hsa-miR-4772 NM_0010976 FUT3 | 1 |
| hsa-miR-4788 NM_0010976 FUT3 | 1 |
| hsa-miR-4793 NM_0010976 FUT3 | 1 |
| hsa-miR-5000 NM_0010976 FUT3 | 1 |
| hsa-miR-5002 NM_0010976 FUT3 | 1 |
| hsa-miR-5189 NM_0010976 FUT3 | 1 |
| hsa-miR-5193 NM_0010976 FUT3 | 1 |
| hsa-miR-5196 NM_0010976 FUT3 | 1 |
| hsa-miR-5581 NM_0010976 FUT3 | 1 |
| hsa-miR-5587 NM_0010976 FUT3 | 1 |
| hsa-miR-6499 NM_0010976 FUT3 | 1 |
| hsa-miR-6500 NM_0010976 FUT3 | 1 |
| hsa-miR-6502 NM_0010976 FUT3 | 1 |
| hsa-miR-6505 NM_0010976 FUT3 | 1 |
| hsa-miR-6726 NM_0010976 FUT3 | 1 |
| hsa-miR-6736 NM_0010976 FUT3 | 1 |
| hsa-miR-6736 NM_0010976 FUT3 | 1 |
| hsa-miR-6738 NM_0010976 FUT3 | 1 |
| hsa-miR-6739 NM_0010976 FUT3 | 1 |
| hsa-miR-6753 NM_0010976 FUT3 | 1 |
| hsa-miR-6764 NM_0010976 FUT3 | 1 |
| hsa-miR-6770 NM_0010976 FUT3 | 1 |
| hsa-miR-6772 NM_0010976 FUT3 | 1 |
| hsa-miR-6773 NM_0010976 FUT3 | 1 |
| hsa-miR-6800 NM_0010976 FUT3 | 1 |
| hsa-miR-6813 NM_0010976 FUT3 | 1 |
| hsa-miR-6814 NM_0010976 FUT3 | 1 |
| hsa-miR-6821 NM_0010976 FUT3 | 1 |
| hsa-miR-6830 NM_0010976 FUT3 | 1 |
| hsa-miR-6833 NM_0010976 FUT3 | 1 |
| hsa-miR-6780 NM_0010976 FUT3 | 1 |
| hsa-miR-6848 NM_0010976 FUT3 | 1 |
| hsa-miR-6769 NM_0010976 FUT3 | 1 |
| hsa-miR-6861 NM_0010976 FUT3 | 1 |
| hsa-miR-6865 NM_0010976 FUT3 | 1 |
| hsa-miR-6873 NM_0010976 FUT3 | 1 |
| hsa-miR-6875 NM_0010976 FUT3 | 1 |
| hsa-miR-6881 NM_0010976 FUT3 | 1 |
| hsa-miR-6889 NM_0010976 FUT3 | 1 |
| hsa-miR-6892 NM_0010976 FUT3 | 1 |
| hsa-miR-6893 NM_0010976 FUT3 | 1 |
| hsa-miR-7111 NM_0010976 FUT3 | 1 |
| hsa-miR-7113 NM_0010976 FUT3 | 1 |
| hsa-miR-7160 NM_0010976 FUT3 | 1 |
| hsa-miR-7162 NM_0010976 FUT3 | 1 |
| hsa-miR-6516 NM_0010976 FUT3 | 1 |
| hsa-miR-7851 NM_0010976 FUT3 | 1 |
| hsa-miR-7855 NM_0010976 FUT3 | 1 |
| hsa-miR-8072 NM_0010976 FUT3 | 1 |
| hsa-miR-9718 NM_0010976 FUT3 | 1 |

|                              |            |   |
|------------------------------|------------|---|
| hsa-miR-9903 NM_0010976 FUT3 |            | 1 |
| hsa-miR-1040 NM_0010976 FUT3 |            | 1 |
| hsa-miR-1140 NM_0010976 FUT3 |            | 1 |
| hsa-miR-3055 NM_0010976 FUT3 |            | 1 |
| hsa-miR-3055 NM_0010976 FUT3 |            | 1 |
| hsa-miR-3085 NM_0010976 FUT3 |            | 1 |
| hsa-miR-1212 NM_0010976 FUT3 |            | 1 |
| hsa-miR-4481 NM_000165 GJA1  | 0.95384615 |   |
| hsa-miR-4274 NM_000165 GJA1  | 0.96153846 |   |
| hsa-miR-3713 NM_000165 GJA1  | 0.96153846 |   |
| hsa-miR-4751 NM_000165 GJA1  | 0.96153846 |   |
| hsa-miR-4797 NM_000165 GJA1  | 0.96153846 |   |
| hsa-miR-7108 NM_000165 GJA1  | 0.96153846 |   |
| hsa-miR-8082 NM_000165 GJA1  | 0.96153846 |   |
| hsa-miR-498- NM_000165 GJA1  | 0.97435897 |   |
| hsa-miR-6500 NM_000165 GJA1  | 0.97435897 |   |
| hsa-miR-6076 NM_000165 GJA1  | 0.98076923 |   |
| hsa-miR-6751 NM_000165 GJA1  | 0.98076923 |   |
| hsa-miR-6830 NM_000165 GJA1  | 0.98461539 |   |
| hsa-let-7d-3p NM_000165 GJA1 |            | 1 |
| hsa-miR-21-3j NM_000165 GJA1 |            | 1 |
| hsa-miR-25-5j NM_000165 GJA1 |            | 1 |
| hsa-miR-103a NM_000165 GJA1  |            | 1 |
| hsa-miR-103a NM_000165 GJA1  |            | 1 |
| hsa-miR-129- NM_000165 GJA1  |            | 1 |
| hsa-miR-30c-4 NM_000165 GJA1 |            | 1 |
| hsa-miR-7-2-3 NM_000165 GJA1 |            | 1 |
| hsa-miR-10a-1 NM_000165 GJA1 |            | 1 |
| hsa-miR-181c NM_000165 GJA1  |            | 1 |
| hsa-miR-187-1 NM_000165 GJA1 |            | 1 |
| hsa-miR-204-1 NM_000165 GJA1 |            | 1 |
| hsa-miR-125b NM_000165 GJA1  |            | 1 |
| hsa-miR-137-1 NM_000165 GJA1 |            | 1 |
| hsa-miR-137-1 NM_000165 GJA1 |            | 1 |
| hsa-miR-140-1 NM_000165 GJA1 |            | 1 |
| hsa-miR-152-1 NM_000165 GJA1 |            | 1 |
| hsa-miR-129-1 NM_000165 GJA1 |            | 1 |
| hsa-miR-134-1 NM_000165 GJA1 |            | 1 |
| hsa-miR-138-1 NM_000165 GJA1 |            | 1 |
| hsa-miR-150-1 NM_000165 GJA1 |            | 1 |
| hsa-miR-193a NM_000165 GJA1  |            | 1 |
| hsa-miR-206 NM_000165 GJA1   |            | 1 |
| hsa-miR-320a NM_000165 GJA1  |            | 1 |
| hsa-miR-194-1 NM_000165 GJA1 |            | 1 |
| hsa-miR-106b NM_000165 GJA1  |            | 1 |
| hsa-miR-296-1 NM_000165 GJA1 |            | 1 |
| hsa-miR-362-1 NM_000165 GJA1 |            | 1 |
| hsa-miR-363-1 NM_000165 GJA1 |            | 1 |
| hsa-miR-365a NM_000165 GJA1  |            | 1 |
| hsa-miR-365b NM_000165 GJA1  |            | 1 |
| hsa-miR-377-1 NM_000165 GJA1 |            | 1 |
| hsa-miR-328-1 NM_000165 GJA1 |            | 1 |
| hsa-miR-331-1 NM_000165 GJA1 |            | 1 |
| hsa-miR-324-1 NM_000165 GJA1 |            | 1 |
| hsa-miR-324-1 NM_000165 GJA1 |            | 1 |
| hsa-miR-339-1 NM_000165 GJA1 |            | 1 |
| hsa-miR-346 NM_000165 GJA1   |            | 1 |
| hsa-miR-18b-1 NM_000165 GJA1 |            | 1 |
| hsa-miR-329-1 NM_000165 GJA1 |            | 1 |
| hsa-miR-412-1 NM_000165 GJA1 |            | 1 |
| hsa-miR-410-1 NM_000165 GJA1 |            | 1 |
| hsa-miR-484 NM_000165 GJA1   |            | 1 |
| hsa-miR-485-1 NM_000165 GJA1 |            | 1 |
| hsa-miR-490-1 NM_000165 GJA1 |            | 1 |
| hsa-miR-490-1 NM_000165 GJA1 |            | 1 |
| hsa-miR-491-1 NM_000165 GJA1 |            | 1 |
| hsa-miR-146b NM_000165 GJA1  |            | 1 |
| hsa-miR-495-1 NM_000165 GJA1 |            | 1 |
| hsa-miR-193b NM_000165 GJA1  |            | 1 |
| hsa-miR-498-1 NM_000165 GJA1 |            | 1 |
| hsa-miR-515-1 NM_000165 GJA1 |            | 1 |
| hsa-miR-519e NM_000165 GJA1  |            | 1 |
| hsa-miR-525-1 NM_000165 GJA1 |            | 1 |
| hsa-miR-517a NM_000165 GJA1  |            | 1 |
| hsa-miR-517b NM_000165 GJA1  |            | 1 |
| hsa-miR-520g NM_000165 GJA1  |            | 1 |
| hsa-miR-518e NM_000165 GJA1  |            | 1 |
| hsa-miR-503-1 NM_000165 GJA1 |            | 1 |
| hsa-miR-503-1 NM_000165 GJA1 |            | 1 |
| hsa-miR-505-1 NM_000165 GJA1 |            | 1 |
| hsa-miR-508-1 NM_000165 GJA1 |            | 1 |
| hsa-miR-556-1 NM_000165 GJA1 |            | 1 |
| hsa-miR-572 NM_000165 GJA1   |            | 1 |
| hsa-miR-585-1 NM_000165 GJA1 |            | 1 |
| hsa-miR-589-1 NM_000165 GJA1 |            | 1 |
| hsa-miR-550a NM_000165 GJA1  |            | 1 |
| hsa-miR-597-1 NM_000165 GJA1 |            | 1 |
| hsa-miR-615-1 NM_000165 GJA1 |            | 1 |
| hsa-miR-616-1 NM_000165 GJA1 |            | 1 |
| hsa-miR-623 NM_000165 GJA1   |            | 1 |
| hsa-miR-628-1 NM_000165 GJA1 |            | 1 |
| hsa-miR-637 NM_000165 GJA1   |            | 1 |
| hsa-miR-642a NM_000165 GJA1  |            | 1 |
| hsa-miR-650 NM_000165 GJA1   |            | 1 |

|              |           |      |   |
|--------------|-----------|------|---|
| hsa-miR-449t | NM_000165 | GJA1 | 1 |
| hsa-miR-1264 | NM_000165 | GJA1 | 1 |
| hsa-miR-668- | NM_000165 | GJA1 | 1 |
| hsa-miR-1296 | NM_000165 | GJA1 | 1 |
| hsa-miR-1271 | NM_000165 | GJA1 | 1 |
| hsa-miR-449c | NM_000165 | GJA1 | 1 |
| hsa-miR-766- | NM_000165 | GJA1 | 1 |
| hsa-miR-891a | NM_000165 | GJA1 | 1 |
| hsa-miR-891a | NM_000165 | GJA1 | 1 |
| hsa-miR-874- | NM_000165 | GJA1 | 1 |
| hsa-miR-708- | NM_000165 | GJA1 | 1 |
| hsa-miR-877- | NM_000165 | GJA1 | 1 |
| hsa-miR-887- | NM_000165 | GJA1 | 1 |
| hsa-miR-935  | NM_000165 | GJA1 | 1 |
| hsa-miR-937- | NM_000165 | GJA1 | 1 |
| hsa-miR-942- | NM_000165 | GJA1 | 1 |
| hsa-miR-1178 | NM_000165 | GJA1 | 1 |
| hsa-miR-1226 | NM_000165 | GJA1 | 1 |
| hsa-miR-1227 | NM_000165 | GJA1 | 1 |
| hsa-miR-1237 | NM_000165 | GJA1 | 1 |
| hsa-miR-1285 | NM_000165 | GJA1 | 1 |
| hsa-miR-1247 | NM_000165 | GJA1 | 1 |
| hsa-miR-1245 | NM_000165 | GJA1 | 1 |
| hsa-miR-1258 | NM_000165 | GJA1 | 1 |
| hsa-miR-1260 | NM_000165 | GJA1 | 1 |
| hsa-miR-1260 | NM_000165 | GJA1 | 1 |
| hsa-miR-1268 | NM_000165 | GJA1 | 1 |
| hsa-miR-664a | NM_000165 | GJA1 | 1 |
| hsa-miR-664a | NM_000165 | GJA1 | 1 |
| hsa-miR-1908 | NM_000165 | GJA1 | 1 |
| hsa-miR-1911 | NM_000165 | GJA1 | 1 |
| hsa-miR-1914 | NM_000165 | GJA1 | 1 |
| hsa-miR-2276 | NM_000165 | GJA1 | 1 |
| hsa-miR-2681 | NM_000165 | GJA1 | 1 |
| hsa-miR-2681 | NM_000165 | GJA1 | 1 |
| hsa-miR-2861 | NM_000165 | GJA1 | 1 |
| hsa-miR-3116 | NM_000165 | GJA1 | 1 |
| hsa-miR-3125 | NM_000165 | GJA1 | 1 |
| hsa-miR-3126 | NM_000165 | GJA1 | 1 |
| hsa-miR-3127 | NM_000165 | GJA1 | 1 |
| hsa-miR-3131 | NM_000165 | GJA1 | 1 |
| hsa-miR-548t | NM_000165 | GJA1 | 1 |
| hsa-miR-3141 | NM_000165 | GJA1 | 1 |
| hsa-miR-3142 | NM_000165 | GJA1 | 1 |
| hsa-miR-548v | NM_000165 | GJA1 | 1 |
| hsa-miR-3148 | NM_000165 | GJA1 | 1 |
| hsa-miR-3158 | NM_000165 | GJA1 | 1 |
| hsa-miR-3162 | NM_000165 | GJA1 | 1 |
| hsa-miR-1260 | NM_000165 | GJA1 | 1 |
| hsa-miR-3173 | NM_000165 | GJA1 | 1 |
| hsa-miR-3185 | NM_000165 | GJA1 | 1 |
| hsa-miR-3190 | NM_000165 | GJA1 | 1 |
| hsa-miR-3191 | NM_000165 | GJA1 | 1 |
| hsa-miR-3192 | NM_000165 | GJA1 | 1 |
| hsa-miR-4298 | NM_000165 | GJA1 | 1 |
| hsa-miR-4300 | NM_000165 | GJA1 | 1 |
| hsa-miR-4305 | NM_000165 | GJA1 | 1 |
| hsa-miR-4315 | NM_000165 | GJA1 | 1 |
| hsa-miR-4255 | NM_000165 | GJA1 | 1 |
| hsa-miR-4286 | NM_000165 | GJA1 | 1 |
| hsa-miR-4290 | NM_000165 | GJA1 | 1 |
| hsa-miR-3617 | NM_000165 | GJA1 | 1 |
| hsa-miR-3622 | NM_000165 | GJA1 | 1 |
| hsa-miR-3648 | NM_000165 | GJA1 | 1 |
| hsa-miR-3662 | NM_000165 | GJA1 | 1 |
| hsa-miR-3666 | NM_000165 | GJA1 | 1 |
| hsa-miR-3677 | NM_000165 | GJA1 | 1 |
| hsa-miR-3679 | NM_000165 | GJA1 | 1 |
| hsa-miR-3681 | NM_000165 | GJA1 | 1 |
| hsa-miR-3682 | NM_000165 | GJA1 | 1 |
| hsa-miR-3682 | NM_000165 | GJA1 | 1 |
| hsa-miR-3921 | NM_000165 | GJA1 | 1 |
| hsa-miR-3927 | NM_000165 | GJA1 | 1 |
| hsa-miR-548a | NM_000165 | GJA1 | 1 |
| hsa-miR-1268 | NM_000165 | GJA1 | 1 |
| hsa-miR-4450 | NM_000165 | GJA1 | 1 |
| hsa-miR-4451 | NM_000165 | GJA1 | 1 |
| hsa-miR-4452 | NM_000165 | GJA1 | 1 |
| hsa-miR-4462 | NM_000165 | GJA1 | 1 |
| hsa-miR-4474 | NM_000165 | GJA1 | 1 |
| hsa-miR-4482 | NM_000165 | GJA1 | 1 |
| hsa-miR-4504 | NM_000165 | GJA1 | 1 |
| hsa-miR-4506 | NM_000165 | GJA1 | 1 |
| hsa-miR-4513 | NM_000165 | GJA1 | 1 |
| hsa-miR-4524 | NM_000165 | GJA1 | 1 |
| hsa-miR-4525 | NM_000165 | GJA1 | 1 |
| hsa-miR-4534 | NM_000165 | GJA1 | 1 |
| hsa-miR-4535 | NM_000165 | GJA1 | 1 |
| hsa-miR-4640 | NM_000165 | GJA1 | 1 |
| hsa-miR-4641 | NM_000165 | GJA1 | 1 |
| hsa-miR-4644 | NM_000165 | GJA1 | 1 |
| hsa-miR-4657 | NM_000165 | GJA1 | 1 |
| hsa-miR-4658 | NM_000165 | GJA1 | 1 |
| hsa-miR-4662 | NM_000165 | GJA1 | 1 |

|                        |      |   |
|------------------------|------|---|
| hsa-miR-4680 NM_000165 | GJA1 | 1 |
| hsa-miR-4684 NM_000165 | GJA1 | 1 |
| hsa-miR-4686 NM_000165 | GJA1 | 1 |
| hsa-miR-4687 NM_000165 | GJA1 | 1 |
| hsa-miR-4700 NM_000165 | GJA1 | 1 |
| hsa-miR-4701 NM_000165 | GJA1 | 1 |
| hsa-miR-4703 NM_000165 | GJA1 | 1 |
| hsa-miR-4704 NM_000165 | GJA1 | 1 |
| hsa-miR-4706 NM_000165 | GJA1 | 1 |
| hsa-miR-4724 NM_000165 | GJA1 | 1 |
| hsa-miR-4747 NM_000165 | GJA1 | 1 |
| hsa-miR-4778 NM_000165 | GJA1 | 1 |
| hsa-miR-4436 NM_000165 | GJA1 | 1 |
| hsa-miR-4781 NM_000165 | GJA1 | 1 |
| hsa-miR-4785 NM_000165 | GJA1 | 1 |
| hsa-miR-4793 NM_000165 | GJA1 | 1 |
| hsa-miR-4794 NM_000165 | GJA1 | 1 |
| hsa-miR-4795 NM_000165 | GJA1 | 1 |
| hsa-miR-5000 NM_000165 | GJA1 | 1 |
| hsa-miR-5001 NM_000165 | GJA1 | 1 |
| hsa-miR-5004 NM_000165 | GJA1 | 1 |
| hsa-miR-5006 NM_000165 | GJA1 | 1 |
| hsa-miR-5006 NM_000165 | GJA1 | 1 |
| hsa-miR-5008 NM_000165 | GJA1 | 1 |
| hsa-miR-5088 NM_000165 | GJA1 | 1 |
| hsa-miR-5186 NM_000165 | GJA1 | 1 |
| hsa-miR-5187 NM_000165 | GJA1 | 1 |
| hsa-miR-5188 NM_000165 | GJA1 | 1 |
| hsa-miR-5196 NM_000165 | GJA1 | 1 |
| hsa-miR-5571 NM_000165 | GJA1 | 1 |
| hsa-miR-664b NM_000165 | GJA1 | 1 |
| hsa-miR-5580 NM_000165 | GJA1 | 1 |
| hsa-miR-5581 NM_000165 | GJA1 | 1 |
| hsa-miR-5584 NM_000165 | GJA1 | 1 |
| hsa-miR-5683 NM_000165 | GJA1 | 1 |
| hsa-miR-5685 NM_000165 | GJA1 | 1 |
| hsa-miR-5681 NM_000165 | GJA1 | 1 |
| hsa-miR-5681 NM_000165 | GJA1 | 1 |
| hsa-miR-5706 NM_000165 | GJA1 | 1 |
| hsa-miR-5739 NM_000165 | GJA1 | 1 |
| hsa-miR-5787 NM_000165 | GJA1 | 1 |
| hsa-miR-1195 NM_000165 | GJA1 | 1 |
| hsa-miR-6125 NM_000165 | GJA1 | 1 |
| hsa-miR-6131 NM_000165 | GJA1 | 1 |
| hsa-miR-6503 NM_000165 | GJA1 | 1 |
| hsa-miR-6505 NM_000165 | GJA1 | 1 |
| hsa-miR-6511 NM_000165 | GJA1 | 1 |
| hsa-miR-6515 NM_000165 | GJA1 | 1 |
| hsa-miR-6716 NM_000165 | GJA1 | 1 |
| hsa-miR-6511 NM_000165 | GJA1 | 1 |
| hsa-miR-6718 NM_000165 | GJA1 | 1 |
| hsa-miR-6720 NM_000165 | GJA1 | 1 |
| hsa-miR-6721 NM_000165 | GJA1 | 1 |
| hsa-miR-6727 NM_000165 | GJA1 | 1 |
| hsa-miR-6728 NM_000165 | GJA1 | 1 |
| hsa-miR-6734 NM_000165 | GJA1 | 1 |
| hsa-miR-6736 NM_000165 | GJA1 | 1 |
| hsa-miR-6737 NM_000165 | GJA1 | 1 |
| hsa-miR-6737 NM_000165 | GJA1 | 1 |
| hsa-miR-6735 NM_000165 | GJA1 | 1 |
| hsa-miR-6741 NM_000165 | GJA1 | 1 |
| hsa-miR-6742 NM_000165 | GJA1 | 1 |
| hsa-miR-6744 NM_000165 | GJA1 | 1 |
| hsa-miR-6745 NM_000165 | GJA1 | 1 |
| hsa-miR-6756 NM_000165 | GJA1 | 1 |
| hsa-miR-6755 NM_000165 | GJA1 | 1 |
| hsa-miR-6761 NM_000165 | GJA1 | 1 |
| hsa-miR-6763 NM_000165 | GJA1 | 1 |
| hsa-miR-6764 NM_000165 | GJA1 | 1 |
| hsa-miR-6765 NM_000165 | GJA1 | 1 |
| hsa-miR-6767 NM_000165 | GJA1 | 1 |
| hsa-miR-6772 NM_000165 | GJA1 | 1 |
| hsa-miR-6774 NM_000165 | GJA1 | 1 |
| hsa-miR-6775 NM_000165 | GJA1 | 1 |
| hsa-miR-6781 NM_000165 | GJA1 | 1 |
| hsa-miR-6782 NM_000165 | GJA1 | 1 |
| hsa-miR-6783 NM_000165 | GJA1 | 1 |
| hsa-miR-6785 NM_000165 | GJA1 | 1 |
| hsa-miR-6792 NM_000165 | GJA1 | 1 |
| hsa-miR-6794 NM_000165 | GJA1 | 1 |
| hsa-miR-6797 NM_000165 | GJA1 | 1 |
| hsa-miR-6798 NM_000165 | GJA1 | 1 |
| hsa-miR-6795 NM_000165 | GJA1 | 1 |
| hsa-miR-6803 NM_000165 | GJA1 | 1 |
| hsa-miR-6804 NM_000165 | GJA1 | 1 |
| hsa-miR-6806 NM_000165 | GJA1 | 1 |
| hsa-miR-6815 NM_000165 | GJA1 | 1 |
| hsa-miR-6815 NM_000165 | GJA1 | 1 |
| hsa-miR-6817 NM_000165 | GJA1 | 1 |
| hsa-miR-6818 NM_000165 | GJA1 | 1 |
| hsa-miR-6815 NM_000165 | GJA1 | 1 |
| hsa-miR-6826 NM_000165 | GJA1 | 1 |
| hsa-miR-6827 NM_000165 | GJA1 | 1 |



|                        |        |            |
|------------------------|--------|------------|
| hsa-miR-6834 NM_000165 | GJA1   | 1          |
| hsa-miR-6835 NM_000165 | GJA1   | 1          |
| hsa-miR-6837 NM_000165 | GJA1   | 1          |
| hsa-miR-6847 NM_000165 | GJA1   | 1          |
| hsa-miR-6849 NM_000165 | GJA1   | 1          |
| hsa-miR-6849 NM_000165 | GJA1   | 1          |
| hsa-miR-6862 NM_000165 | GJA1   | 1          |
| hsa-miR-6865 NM_000165 | GJA1   | 1          |
| hsa-miR-6866 NM_000165 | GJA1   | 1          |
| hsa-miR-6867 NM_000165 | GJA1   | 1          |
| hsa-miR-6867 NM_000165 | GJA1   | 1          |
| hsa-miR-6871 NM_000165 | GJA1   | 1          |
| hsa-miR-6872 NM_000165 | GJA1   | 1          |
| hsa-miR-6873 NM_000165 | GJA1   | 1          |
| hsa-miR-6876 NM_000165 | GJA1   | 1          |
| hsa-miR-6880 NM_000165 | GJA1   | 1          |
| hsa-miR-6881 NM_000165 | GJA1   | 1          |
| hsa-miR-6882 NM_000165 | GJA1   | 1          |
| hsa-miR-6883 NM_000165 | GJA1   | 1          |
| hsa-miR-6886 NM_000165 | GJA1   | 1          |
| hsa-miR-6887 NM_000165 | GJA1   | 1          |
| hsa-miR-6890 NM_000165 | GJA1   | 1          |
| hsa-miR-6891 NM_000165 | GJA1   | 1          |
| hsa-miR-6892 NM_000165 | GJA1   | 1          |
| hsa-miR-6893 NM_000165 | GJA1   | 1          |
| hsa-miR-7109 NM_000165 | GJA1   | 1          |
| hsa-miR-7109 NM_000165 | GJA1   | 1          |
| hsa-miR-7110 NM_000165 | GJA1   | 1          |
| hsa-miR-7111 NM_000165 | GJA1   | 1          |
| hsa-miR-7111 NM_000165 | GJA1   | 1          |
| hsa-miR-7155 NM_000165 | GJA1   | 1          |
| hsa-miR-7155 NM_000165 | GJA1   | 1          |
| hsa-miR-7155 NM_000165 | GJA1   | 1          |
| hsa-miR-7160 NM_000165 | GJA1   | 1          |
| hsa-miR-7703 NM_000165 | GJA1   | 1          |
| hsa-miR-8056 NM_000165 | GJA1   | 1          |
| hsa-miR-8081 NM_000165 | GJA1   | 1          |
| hsa-miR-9898 NM_000165 | GJA1   | 1          |
| hsa-miR-9900 NM_000165 | GJA1   | 1          |
| hsa-miR-9901 NM_000165 | GJA1   | 1          |
| hsa-miR-1039 NM_000165 | GJA1   | 1          |
| hsa-miR-1039 NM_000165 | GJA1   | 1          |
| hsa-miR-9983 NM_000165 | GJA1   | 1          |
| hsa-miR-1118 NM_000165 | GJA1   | 1          |
| hsa-miR-1212 NM_000165 | GJA1   | 1          |
| hsa-miR-299- NM_000393 | COL5A2 | 0.95384615 |
| hsa-miR-633 NM_000393  | COL5A2 | 0.95384615 |
| hsa-miR-455- NM_000393 | COL5A2 | 0.96153846 |
| hsa-miR-574- NM_000393 | COL5A2 | 0.96153846 |
| hsa-miR-1233 NM_000393 | COL5A2 | 0.96153846 |
| hsa-miR-4747 NM_000393 | COL5A2 | 0.96153846 |
| hsa-miR-6529 NM_000393 | COL5A2 | 0.96153846 |
| hsa-miR-92a- NM_000393 | COL5A2 | 1          |
| hsa-miR-101- NM_000393 | COL5A2 | 1          |
| hsa-miR-197- NM_000393 | COL5A2 | 1          |
| hsa-miR-199a NM_000393 | COL5A2 | 1          |
| hsa-miR-181a NM_000393 | COL5A2 | 1          |
| hsa-miR-199b NM_000393 | COL5A2 | 1          |
| hsa-miR-143- NM_000393 | COL5A2 | 1          |
| hsa-miR-302a NM_000393 | COL5A2 | 1          |
| hsa-miR-340- NM_000393 | COL5A2 | 1          |
| hsa-miR-553 NM_000393  | COL5A2 | 1          |
| hsa-miR-574- NM_000393 | COL5A2 | 1          |
| hsa-miR-605- NM_000393 | COL5A2 | 1          |
| hsa-miR-656- NM_000393 | COL5A2 | 1          |
| hsa-miR-920 NM_000393  | COL5A2 | 1          |
| hsa-miR-922 NM_000393  | COL5A2 | 1          |
| hsa-miR-936 NM_000393  | COL5A2 | 1          |
| hsa-miR-1303 NM_000393 | COL5A2 | 1          |
| hsa-miR-1255 NM_000393 | COL5A2 | 1          |
| hsa-miR-1324 NM_000393 | COL5A2 | 1          |
| hsa-miR-103b NM_000393 | COL5A2 | 1          |
| hsa-miR-1912 NM_000393 | COL5A2 | 1          |
| hsa-miR-2278 NM_000393 | COL5A2 | 1          |
| hsa-miR-378b NM_000393 | COL5A2 | 1          |
| hsa-miR-314C NM_000393 | COL5A2 | 1          |
| hsa-miR-3146 NM_000393 | COL5A2 | 1          |
| hsa-miR-3147 NM_000393 | COL5A2 | 1          |
| hsa-miR-3153 NM_000393 | COL5A2 | 1          |
| hsa-miR-3164 NM_000393 | COL5A2 | 1          |
| hsa-miR-3168 NM_000393 | COL5A2 | 1          |
| hsa-miR-3173 NM_000393 | COL5A2 | 1          |
| hsa-miR-3174 NM_000393 | COL5A2 | 1          |
| hsa-miR-3175 NM_000393 | COL5A2 | 1          |
| hsa-miR-378c NM_000393 | COL5A2 | 1          |
| hsa-miR-4299 NM_000393 | COL5A2 | 1          |
| hsa-miR-4316 NM_000393 | COL5A2 | 1          |
| hsa-miR-2355 NM_000393 | COL5A2 | 1          |
| hsa-miR-4279 NM_000393 | COL5A2 | 1          |
| hsa-miR-3649 NM_000393 | COL5A2 | 1          |
| hsa-miR-3682 NM_000393 | COL5A2 | 1          |
| hsa-miR-3691 NM_000393 | COL5A2 | 1          |
| hsa-miR-3692 NM_000393 | COL5A2 | 1          |
| hsa-miR-3925 NM_000393 | COL5A2 | 1          |
| hsa-miR-4446 NM_000393 | COL5A2 | 1          |

|               |            |         |            |
|---------------|------------|---------|------------|
| hsa-miR-449c  | NM_000393  | COL5A2  | 1          |
| hsa-miR-4506  | NM_000393  | COL5A2  | 1          |
| hsa-miR-4517  | NM_000393  | COL5A2  | 1          |
| hsa-miR-4518  | NM_000393  | COL5A2  | 1          |
| hsa-miR-4525  | NM_000393  | COL5A2  | 1          |
| hsa-miR-454c  | NM_000393  | COL5A2  | 1          |
| hsa-miR-3975  | NM_000393  | COL5A2  | 1          |
| hsa-miR-470c  | NM_000393  | COL5A2  | 1          |
| hsa-miR-4704  | NM_000393  | COL5A2  | 1          |
| hsa-miR-4708  | NM_000393  | COL5A2  | 1          |
| hsa-miR-471c  | NM_000393  | COL5A2  | 1          |
| hsa-miR-4711  | NM_000393  | COL5A2  | 1          |
| hsa-miR-4715  | NM_000393  | COL5A2  | 1          |
| hsa-miR-4725  | NM_000393  | COL5A2  | 1          |
| hsa-miR-4732  | NM_000393  | COL5A2  | 1          |
| hsa-miR-475c  | NM_000393  | COL5A2  | 1          |
| hsa-miR-4773  | NM_000393  | COL5A2  | 1          |
| hsa-miR-4785  | NM_000393  | COL5A2  | 1          |
| hsa-miR-4797  | NM_000393  | COL5A2  | 1          |
| hsa-miR-664b  | NM_000393  | COL5A2  | 1          |
| hsa-miR-6074  | NM_000393  | COL5A2  | 1          |
| hsa-miR-6086  | NM_000393  | COL5A2  | 1          |
| hsa-miR-6086  | NM_000393  | COL5A2  | 1          |
| hsa-miR-6088  | NM_000393  | COL5A2  | 1          |
| hsa-miR-6508  | NM_000393  | COL5A2  | 1          |
| hsa-miR-6509  | NM_000393  | COL5A2  | 1          |
| hsa-miR-6731  | NM_000393  | COL5A2  | 1          |
| hsa-miR-6746  | NM_000393  | COL5A2  | 1          |
| hsa-miR-6758  | NM_000393  | COL5A2  | 1          |
| hsa-miR-6775  | NM_000393  | COL5A2  | 1          |
| hsa-miR-6847  | NM_000393  | COL5A2  | 1          |
| hsa-miR-6856  | NM_000393  | COL5A2  | 1          |
| hsa-miR-6856  | NM_000393  | COL5A2  | 1          |
| hsa-miR-686c  | NM_000393  | COL5A2  | 1          |
| hsa-miR-689c  | NM_000393  | COL5A2  | 1          |
| hsa-miR-715c  | NM_000393  | COL5A2  | 1          |
| hsa-miR-8056  | NM_000393  | COL5A2  | 1          |
| hsa-miR-8057  | NM_000393  | COL5A2  | 1          |
| hsa-miR-8065  | NM_000393  | COL5A2  | 1          |
| hsa-miR-8065  | NM_000393  | COL5A2  | 1          |
| hsa-miR-1213  | NM_000393  | COL5A2  | 1          |
| hsa-miR-125a  | XM_0052565 | ALDH3A1 | 0.96153846 |
| hsa-miR-4486  | XM_0052565 | ALDH3A1 | 0.96153846 |
| hsa-miR-3176  | NM_0013301 | ALDH3A1 | 0.96153846 |
| hsa-miR-4474  | NM_0013301 | ALDH3A1 | 0.96153846 |
| hsa-miR-4485  | NM_0013301 | ALDH3A1 | 0.96153846 |
| hsa-miR-1225  | NM_000691  | ALDH3A1 | 0.96153846 |
| hsa-miR-1052  | NM_000691  | ALDH3A1 | 0.96153846 |
| hsa-miR-104c  | NM_0011351 | ALDH3A1 | 0.96153846 |
| hsa-miR-1052  | NM_0011351 | ALDH3A1 | 0.96153846 |
| hsa-miR-362c  | NM_0013301 | ALDH3A1 | 0.97435897 |
| hsa-miR-362c  | NM_000691  | ALDH3A1 | 0.97435897 |
| hsa-miR-3191  | XM_0052565 | ALDH3A1 | 0.98076923 |
| hsa-miR-4492  | XM_0052565 | ALDH3A1 | 0.98076923 |
| hsa-miR-4507  | XM_0052565 | ALDH3A1 | 0.98076923 |
| hsa-miR-6774  | NM_0013301 | ALDH3A1 | 0.98076923 |
| hsa-miR-106b  | NM_000691  | ALDH3A1 | 0.98076923 |
| hsa-miR-4507  | NM_0011351 | ALDH3A1 | 0.98076923 |
| hsa-miR-15a-  | XM_0052565 | ALDH3A1 | 1          |
| hsa-miR-24-3j | XM_0052565 | ALDH3A1 | 1          |
| hsa-miR-25-5j | XM_0052565 | ALDH3A1 | 1          |
| hsa-miR-92a-  | XM_0052565 | ALDH3A1 | 1          |
| hsa-miR-320a  | XM_0052565 | ALDH3A1 | 1          |
| hsa-miR-202-  | XM_0052565 | ALDH3A1 | 1          |
| hsa-miR-504-  | XM_0052565 | ALDH3A1 | 1          |
| hsa-miR-320b  | XM_0052565 | ALDH3A1 | 1          |
| hsa-miR-762   | XM_0052565 | ALDH3A1 | 1          |
| hsa-miR-675-  | XM_0052565 | ALDH3A1 | 1          |
| hsa-miR-873-  | XM_0052565 | ALDH3A1 | 1          |
| hsa-miR-760   | XM_0052565 | ALDH3A1 | 1          |
| hsa-miR-936   | XM_0052565 | ALDH3A1 | 1          |
| hsa-miR-1178  | XM_0052565 | ALDH3A1 | 1          |
| hsa-miR-1293  | XM_0052565 | ALDH3A1 | 1          |
| hsa-miR-3141  | XM_0052565 | ALDH3A1 | 1          |
| hsa-miR-3151  | XM_0052565 | ALDH3A1 | 1          |
| hsa-miR-3176  | XM_0052565 | ALDH3A1 | 1          |
| hsa-miR-320e  | XM_0052565 | ALDH3A1 | 1          |
| hsa-miR-3192  | XM_0052565 | ALDH3A1 | 1          |
| hsa-miR-3197  | XM_0052565 | ALDH3A1 | 1          |
| hsa-miR-4302  | XM_0052565 | ALDH3A1 | 1          |
| hsa-miR-4316  | XM_0052565 | ALDH3A1 | 1          |
| hsa-miR-3621  | XM_0052565 | ALDH3A1 | 1          |
| hsa-miR-3926  | XM_0052565 | ALDH3A1 | 1          |
| hsa-miR-3945  | XM_0052565 | ALDH3A1 | 1          |
| hsa-miR-4425  | XM_0052565 | ALDH3A1 | 1          |
| hsa-miR-445c  | XM_0052565 | ALDH3A1 | 1          |
| hsa-miR-4463  | XM_0052565 | ALDH3A1 | 1          |
| hsa-miR-4466  | XM_0052565 | ALDH3A1 | 1          |
| hsa-miR-4484  | XM_0052565 | ALDH3A1 | 1          |
| hsa-miR-4505  | XM_0052565 | ALDH3A1 | 1          |
| hsa-miR-4538  | XM_0052565 | ALDH3A1 | 1          |
| hsa-miR-4661  | XM_0052565 | ALDH3A1 | 1          |
| hsa-miR-4675  | XM_0052565 | ALDH3A1 | 1          |
| hsa-miR-4722  | XM_0052565 | ALDH3A1 | 1          |

|                          |         |   |
|--------------------------|---------|---|
| hsa-miR-4723 XM_0052565  | ALDH3A1 | 1 |
| hsa-miR-4728 XM_0052565  | ALDH3A1 | 1 |
| hsa-miR-4734 XM_0052565  | ALDH3A1 | 1 |
| hsa-miR-4761 XM_0052565  | ALDH3A1 | 1 |
| hsa-miR-5008 XM_0052565  | ALDH3A1 | 1 |
| hsa-miR-5185 XM_0052565  | ALDH3A1 | 1 |
| hsa-miR-5194 XM_0052565  | ALDH3A1 | 1 |
| hsa-miR-5194 XM_0052565  | ALDH3A1 | 1 |
| hsa-miR-5572 XM_0052565  | ALDH3A1 | 1 |
| hsa-miR-5698 XM_0052565  | ALDH3A1 | 1 |
| hsa-miR-5739 XM_0052565  | ALDH3A1 | 1 |
| hsa-miR-608C XM_0052565  | ALDH3A1 | 1 |
| hsa-miR-6085 XM_0052565  | ALDH3A1 | 1 |
| hsa-miR-6086 XM_0052565  | ALDH3A1 | 1 |
| hsa-miR-6165 XM_0052565  | ALDH3A1 | 1 |
| hsa-miR-6515 XM_0052565  | ALDH3A1 | 1 |
| hsa-miR-6717 XM_0052565  | ALDH3A1 | 1 |
| hsa-miR-6721 XM_0052565  | ALDH3A1 | 1 |
| hsa-miR-6722 XM_0052565  | ALDH3A1 | 1 |
| hsa-miR-6726 XM_0052565  | ALDH3A1 | 1 |
| hsa-miR-6726 XM_0052565  | ALDH3A1 | 1 |
| hsa-miR-6727 XM_0052565  | ALDH3A1 | 1 |
| hsa-miR-6745 XM_0052565  | ALDH3A1 | 1 |
| hsa-miR-6756 XM_0052565  | ALDH3A1 | 1 |
| hsa-miR-6773 XM_0052565  | ALDH3A1 | 1 |
| hsa-miR-6777 XM_0052565  | ALDH3A1 | 1 |
| hsa-miR-6775 XM_0052565  | ALDH3A1 | 1 |
| hsa-miR-6786 XM_0052565  | ALDH3A1 | 1 |
| hsa-miR-6788 XM_0052565  | ALDH3A1 | 1 |
| hsa-miR-6791 XM_0052565  | ALDH3A1 | 1 |
| hsa-miR-6796 XM_0052565  | ALDH3A1 | 1 |
| hsa-miR-6813 XM_0052565  | ALDH3A1 | 1 |
| hsa-miR-6820 XM_0052565  | ALDH3A1 | 1 |
| hsa-miR-6821 XM_0052565  | ALDH3A1 | 1 |
| hsa-miR-6842 XM_0052565  | ALDH3A1 | 1 |
| hsa-miR-6845 XM_0052565  | ALDH3A1 | 1 |
| hsa-miR-6846 XM_0052565  | ALDH3A1 | 1 |
| hsa-miR-6861 XM_0052565  | ALDH3A1 | 1 |
| hsa-miR-6865 XM_0052565  | ALDH3A1 | 1 |
| hsa-miR-6894 XM_0052565  | ALDH3A1 | 1 |
| hsa-miR-7106 XM_0052565  | ALDH3A1 | 1 |
| hsa-miR-7106 XM_0052565  | ALDH3A1 | 1 |
| hsa-miR-7114 XM_0052565  | ALDH3A1 | 1 |
| hsa-miR-7155 XM_0052565  | ALDH3A1 | 1 |
| hsa-miR-1273 XM_0052565  | ALDH3A1 | 1 |
| hsa-miR-8071 XM_0052565  | ALDH3A1 | 1 |
| hsa-miR-8088 XM_0052565  | ALDH3A1 | 1 |
| hsa-miR-104C XM_0052565  | ALDH3A1 | 1 |
| hsa-miR-1211 XM_0052565  | ALDH3A1 | 1 |
| hsa-miR-15a- NM_0013301  | ALDH3A1 | 1 |
| hsa-miR-25-5j NM_0013301 | ALDH3A1 | 1 |
| hsa-miR-92a- NM_0013301  | ALDH3A1 | 1 |
| hsa-miR-197- NM_0013301  | ALDH3A1 | 1 |
| hsa-miR-129- NM_0013301  | ALDH3A1 | 1 |
| hsa-miR-194- NM_0013301  | ALDH3A1 | 1 |
| hsa-miR-106t NM_0013301  | ALDH3A1 | 1 |
| hsa-miR-378a NM_0013301  | ALDH3A1 | 1 |
| hsa-miR-330- NM_0013301  | ALDH3A1 | 1 |
| hsa-miR-202- NM_0013301  | ALDH3A1 | 1 |
| hsa-miR-492 NM_0013301   | ALDH3A1 | 1 |
| hsa-miR-505- NM_0013301  | ALDH3A1 | 1 |
| hsa-miR-564 NM_0013301   | ALDH3A1 | 1 |
| hsa-miR-647 NM_0013301   | ALDH3A1 | 1 |
| hsa-miR-661 NM_0013301   | ALDH3A1 | 1 |
| hsa-miR-658 NM_0013301   | ALDH3A1 | 1 |
| hsa-miR-762 NM_0013301   | ALDH3A1 | 1 |
| hsa-miR-675- NM_0013301  | ALDH3A1 | 1 |
| hsa-miR-936 NM_0013301   | ALDH3A1 | 1 |
| hsa-miR-937- NM_0013301  | ALDH3A1 | 1 |
| hsa-miR-1225 NM_0013301  | ALDH3A1 | 1 |
| hsa-miR-1226 NM_0013301  | ALDH3A1 | 1 |
| hsa-miR-1202 NM_0013301  | ALDH3A1 | 1 |
| hsa-miR-711 NM_0013301   | ALDH3A1 | 1 |
| hsa-miR-3116 NM_0013301  | ALDH3A1 | 1 |
| hsa-miR-3136 NM_0013301  | ALDH3A1 | 1 |
| hsa-miR-3141 NM_0013301  | ALDH3A1 | 1 |
| hsa-miR-3151 NM_0013301  | ALDH3A1 | 1 |
| hsa-miR-3175 NM_0013301  | ALDH3A1 | 1 |
| hsa-miR-3175 NM_0013301  | ALDH3A1 | 1 |
| hsa-miR-3187 NM_0013301  | ALDH3A1 | 1 |
| hsa-miR-320e NM_0013301  | ALDH3A1 | 1 |
| hsa-miR-3191 NM_0013301  | ALDH3A1 | 1 |
| hsa-miR-4302 NM_0013301  | ALDH3A1 | 1 |
| hsa-miR-4316 NM_0013301  | ALDH3A1 | 1 |
| hsa-miR-4270 NM_0013301  | ALDH3A1 | 1 |
| hsa-miR-3621 NM_0013301  | ALDH3A1 | 1 |
| hsa-miR-4418 NM_0013301  | ALDH3A1 | 1 |
| hsa-miR-4428 NM_0013301  | ALDH3A1 | 1 |
| hsa-miR-4433 NM_0013301  | ALDH3A1 | 1 |
| hsa-miR-4450 NM_0013301  | ALDH3A1 | 1 |
| hsa-miR-4486 NM_0013301  | ALDH3A1 | 1 |
| hsa-miR-4492 NM_0013301  | ALDH3A1 | 1 |
| hsa-miR-4506 NM_0013301  | ALDH3A1 | 1 |
| hsa-miR-4538 NM_0013301  | ALDH3A1 | 1 |

|               |            |         |   |
|---------------|------------|---------|---|
| hsa-miR-396C  | NM_0013301 | ALDH3A1 | 1 |
| hsa-miR-465C  | NM_0013301 | ALDH3A1 | 1 |
| hsa-miR-4657  | NM_0013301 | ALDH3A1 | 1 |
| hsa-miR-4676  | NM_0013301 | ALDH3A1 | 1 |
| hsa-miR-4722  | NM_0013301 | ALDH3A1 | 1 |
| hsa-miR-4723  | NM_0013301 | ALDH3A1 | 1 |
| hsa-miR-4734  | NM_0013301 | ALDH3A1 | 1 |
| hsa-miR-4804  | NM_0013301 | ALDH3A1 | 1 |
| hsa-miR-5008  | NM_0013301 | ALDH3A1 | 1 |
| hsa-miR-5194  | NM_0013301 | ALDH3A1 | 1 |
| hsa-miR-5194  | NM_0013301 | ALDH3A1 | 1 |
| hsa-miR-5196  | NM_0013301 | ALDH3A1 | 1 |
| hsa-miR-5196  | NM_0013301 | ALDH3A1 | 1 |
| hsa-miR-5698  | NM_0013301 | ALDH3A1 | 1 |
| hsa-miR-5735  | NM_0013301 | ALDH3A1 | 1 |
| hsa-miR-6065  | NM_0013301 | ALDH3A1 | 1 |
| hsa-miR-6124  | NM_0013301 | ALDH3A1 | 1 |
| hsa-miR-6127  | NM_0013301 | ALDH3A1 | 1 |
| hsa-miR-6515  | NM_0013301 | ALDH3A1 | 1 |
| hsa-miR-6511  | NM_0013301 | ALDH3A1 | 1 |
| hsa-miR-6721  | NM_0013301 | ALDH3A1 | 1 |
| hsa-miR-6726  | NM_0013301 | ALDH3A1 | 1 |
| hsa-miR-6728  | NM_0013301 | ALDH3A1 | 1 |
| hsa-miR-6741  | NM_0013301 | ALDH3A1 | 1 |
| hsa-miR-6747  | NM_0013301 | ALDH3A1 | 1 |
| hsa-miR-6745  | NM_0013301 | ALDH3A1 | 1 |
| hsa-miR-6757  | NM_0013301 | ALDH3A1 | 1 |
| hsa-miR-6771  | NM_0013301 | ALDH3A1 | 1 |
| hsa-miR-6772  | NM_0013301 | ALDH3A1 | 1 |
| hsa-miR-6773  | NM_0013301 | ALDH3A1 | 1 |
| hsa-miR-6775  | NM_0013301 | ALDH3A1 | 1 |
| hsa-miR-6785  | NM_0013301 | ALDH3A1 | 1 |
| hsa-miR-6788  | NM_0013301 | ALDH3A1 | 1 |
| hsa-miR-6791  | NM_0013301 | ALDH3A1 | 1 |
| hsa-miR-6796  | NM_0013301 | ALDH3A1 | 1 |
| hsa-miR-6797  | NM_0013301 | ALDH3A1 | 1 |
| hsa-miR-6795  | NM_0013301 | ALDH3A1 | 1 |
| hsa-miR-6807  | NM_0013301 | ALDH3A1 | 1 |
| hsa-miR-6813  | NM_0013301 | ALDH3A1 | 1 |
| hsa-miR-6821  | NM_0013301 | ALDH3A1 | 1 |
| hsa-miR-6825  | NM_0013301 | ALDH3A1 | 1 |
| hsa-miR-6842  | NM_0013301 | ALDH3A1 | 1 |
| hsa-miR-6845  | NM_0013301 | ALDH3A1 | 1 |
| hsa-miR-6851  | NM_0013301 | ALDH3A1 | 1 |
| hsa-miR-6861  | NM_0013301 | ALDH3A1 | 1 |
| hsa-miR-6867  | NM_0013301 | ALDH3A1 | 1 |
| hsa-miR-687C  | NM_0013301 | ALDH3A1 | 1 |
| hsa-miR-6871  | NM_0013301 | ALDH3A1 | 1 |
| hsa-miR-6895  | NM_0013301 | ALDH3A1 | 1 |
| hsa-miR-6895  | NM_0013301 | ALDH3A1 | 1 |
| hsa-miR-7106  | NM_0013301 | ALDH3A1 | 1 |
| hsa-miR-7114  | NM_0013301 | ALDH3A1 | 1 |
| hsa-miR-7843  | NM_0013301 | ALDH3A1 | 1 |
| hsa-miR-4433  | NM_0013301 | ALDH3A1 | 1 |
| hsa-miR-1273  | NM_0013301 | ALDH3A1 | 1 |
| hsa-miR-7847  | NM_0013301 | ALDH3A1 | 1 |
| hsa-miR-7851  | NM_0013301 | ALDH3A1 | 1 |
| hsa-miR-8085  | NM_0013301 | ALDH3A1 | 1 |
| hsa-miR-8088  | NM_0013301 | ALDH3A1 | 1 |
| hsa-miR-104C  | NM_0013301 | ALDH3A1 | 1 |
| hsa-miR-1135  | NM_0013301 | ALDH3A1 | 1 |
| hsa-miR-1211  | NM_0013301 | ALDH3A1 | 1 |
| hsa-miR-1211  | NM_0013301 | ALDH3A1 | 1 |
| hsa-miR-25-5j | NM_000691  | ALDH3A1 | 1 |
| hsa-miR-92a-  | NM_000691  | ALDH3A1 | 1 |
| hsa-miR-92a-  | NM_000691  | ALDH3A1 | 1 |
| hsa-miR-197-  | NM_000691  | ALDH3A1 | 1 |
| hsa-miR-129-  | NM_000691  | ALDH3A1 | 1 |
| hsa-miR-125a  | NM_000691  | ALDH3A1 | 1 |
| hsa-miR-194-  | NM_000691  | ALDH3A1 | 1 |
| hsa-miR-378a  | NM_000691  | ALDH3A1 | 1 |
| hsa-miR-492   | NM_000691  | ALDH3A1 | 1 |
| hsa-miR-505-  | NM_000691  | ALDH3A1 | 1 |
| hsa-miR-564   | NM_000691  | ALDH3A1 | 1 |
| hsa-miR-584-  | NM_000691  | ALDH3A1 | 1 |
| hsa-miR-658   | NM_000691  | ALDH3A1 | 1 |
| hsa-miR-762   | NM_000691  | ALDH3A1 | 1 |
| hsa-miR-675-  | NM_000691  | ALDH3A1 | 1 |
| hsa-miR-744-  | NM_000691  | ALDH3A1 | 1 |
| hsa-miR-937-  | NM_000691  | ALDH3A1 | 1 |
| hsa-miR-1178  | NM_000691  | ALDH3A1 | 1 |
| hsa-miR-1226  | NM_000691  | ALDH3A1 | 1 |
| hsa-miR-1202  | NM_000691  | ALDH3A1 | 1 |
| hsa-miR-1293  | NM_000691  | ALDH3A1 | 1 |
| hsa-miR-711   | NM_000691  | ALDH3A1 | 1 |
| hsa-miR-3141  | NM_000691  | ALDH3A1 | 1 |
| hsa-miR-3141  | NM_000691  | ALDH3A1 | 1 |
| hsa-miR-3151  | NM_000691  | ALDH3A1 | 1 |
| hsa-miR-3175  | NM_000691  | ALDH3A1 | 1 |
| hsa-miR-3176  | NM_000691  | ALDH3A1 | 1 |
| hsa-miR-3175  | NM_000691  | ALDH3A1 | 1 |
| hsa-miR-3187  | NM_000691  | ALDH3A1 | 1 |
| hsa-miR-320e  | NM_000691  | ALDH3A1 | 1 |
| hsa-miR-4302  | NM_000691  | ALDH3A1 | 1 |

|                          |         |   |
|--------------------------|---------|---|
| hsa-miR-4316 NM_000691   | ALDH3A1 | 1 |
| hsa-miR-4270 NM_000691   | ALDH3A1 | 1 |
| hsa-miR-4283 NM_000691   | ALDH3A1 | 1 |
| hsa-miR-3621 NM_000691   | ALDH3A1 | 1 |
| hsa-miR-3945 NM_000691   | ALDH3A1 | 1 |
| hsa-miR-4418 NM_000691   | ALDH3A1 | 1 |
| hsa-miR-4433 NM_000691   | ALDH3A1 | 1 |
| hsa-miR-4433 NM_000691   | ALDH3A1 | 1 |
| hsa-miR-4435 NM_000691   | ALDH3A1 | 1 |
| hsa-miR-4450 NM_000691   | ALDH3A1 | 1 |
| hsa-miR-4492 NM_000691   | ALDH3A1 | 1 |
| hsa-miR-4505 NM_000691   | ALDH3A1 | 1 |
| hsa-miR-4506 NM_000691   | ALDH3A1 | 1 |
| hsa-miR-4538 NM_000691   | ALDH3A1 | 1 |
| hsa-miR-3960 NM_000691   | ALDH3A1 | 1 |
| hsa-miR-4650 NM_000691   | ALDH3A1 | 1 |
| hsa-miR-4675 NM_000691   | ALDH3A1 | 1 |
| hsa-miR-4690 NM_000691   | ALDH3A1 | 1 |
| hsa-miR-4722 NM_000691   | ALDH3A1 | 1 |
| hsa-miR-4723 NM_000691   | ALDH3A1 | 1 |
| hsa-miR-4735 NM_000691   | ALDH3A1 | 1 |
| hsa-miR-5008 NM_000691   | ALDH3A1 | 1 |
| hsa-miR-5192 NM_000691   | ALDH3A1 | 1 |
| hsa-miR-5194 NM_000691   | ALDH3A1 | 1 |
| hsa-miR-5194 NM_000691   | ALDH3A1 | 1 |
| hsa-miR-5196 NM_000691   | ALDH3A1 | 1 |
| hsa-miR-5698 NM_000691   | ALDH3A1 | 1 |
| hsa-miR-6065 NM_000691   | ALDH3A1 | 1 |
| hsa-miR-6085 NM_000691   | ALDH3A1 | 1 |
| hsa-miR-6086 NM_000691   | ALDH3A1 | 1 |
| hsa-miR-6124 NM_000691   | ALDH3A1 | 1 |
| hsa-miR-6127 NM_000691   | ALDH3A1 | 1 |
| hsa-miR-6129 NM_000691   | ALDH3A1 | 1 |
| hsa-miR-6515 NM_000691   | ALDH3A1 | 1 |
| hsa-miR-6511 NM_000691   | ALDH3A1 | 1 |
| hsa-miR-6721 NM_000691   | ALDH3A1 | 1 |
| hsa-miR-6726 NM_000691   | ALDH3A1 | 1 |
| hsa-miR-6728 NM_000691   | ALDH3A1 | 1 |
| hsa-miR-6742 NM_000691   | ALDH3A1 | 1 |
| hsa-miR-6747 NM_000691   | ALDH3A1 | 1 |
| hsa-miR-6749 NM_000691   | ALDH3A1 | 1 |
| hsa-miR-6751 NM_000691   | ALDH3A1 | 1 |
| hsa-miR-6766 NM_000691   | ALDH3A1 | 1 |
| hsa-miR-6772 NM_000691   | ALDH3A1 | 1 |
| hsa-miR-6773 NM_000691   | ALDH3A1 | 1 |
| hsa-miR-6773 NM_000691   | ALDH3A1 | 1 |
| hsa-miR-6777 NM_000691   | ALDH3A1 | 1 |
| hsa-miR-6779 NM_000691   | ALDH3A1 | 1 |
| hsa-miR-6786 NM_000691   | ALDH3A1 | 1 |
| hsa-miR-6788 NM_000691   | ALDH3A1 | 1 |
| hsa-miR-6791 NM_000691   | ALDH3A1 | 1 |
| hsa-miR-6796 NM_000691   | ALDH3A1 | 1 |
| hsa-miR-6795 NM_000691   | ALDH3A1 | 1 |
| hsa-miR-6807 NM_000691   | ALDH3A1 | 1 |
| hsa-miR-6813 NM_000691   | ALDH3A1 | 1 |
| hsa-miR-6821 NM_000691   | ALDH3A1 | 1 |
| hsa-miR-6825 NM_000691   | ALDH3A1 | 1 |
| hsa-miR-6780 NM_000691   | ALDH3A1 | 1 |
| hsa-miR-6842 NM_000691   | ALDH3A1 | 1 |
| hsa-miR-6845 NM_000691   | ALDH3A1 | 1 |
| hsa-miR-6861 NM_000691   | ALDH3A1 | 1 |
| hsa-miR-6865 NM_000691   | ALDH3A1 | 1 |
| hsa-miR-6867 NM_000691   | ALDH3A1 | 1 |
| hsa-miR-6870 NM_000691   | ALDH3A1 | 1 |
| hsa-miR-6871 NM_000691   | ALDH3A1 | 1 |
| hsa-miR-6871 NM_000691   | ALDH3A1 | 1 |
| hsa-miR-6875 NM_000691   | ALDH3A1 | 1 |
| hsa-miR-6883 NM_000691   | ALDH3A1 | 1 |
| hsa-miR-6884 NM_000691   | ALDH3A1 | 1 |
| hsa-miR-6893 NM_000691   | ALDH3A1 | 1 |
| hsa-miR-6895 NM_000691   | ALDH3A1 | 1 |
| hsa-miR-7106 NM_000691   | ALDH3A1 | 1 |
| hsa-miR-7114 NM_000691   | ALDH3A1 | 1 |
| hsa-miR-4433 NM_000691   | ALDH3A1 | 1 |
| hsa-miR-1273 NM_000691   | ALDH3A1 | 1 |
| hsa-miR-8085 NM_000691   | ALDH3A1 | 1 |
| hsa-miR-8088 NM_000691   | ALDH3A1 | 1 |
| hsa-miR-1035 NM_000691   | ALDH3A1 | 1 |
| hsa-miR-1040 NM_000691   | ALDH3A1 | 1 |
| hsa-miR-1040 NM_000691   | ALDH3A1 | 1 |
| hsa-miR-1135 NM_000691   | ALDH3A1 | 1 |
| hsa-miR-1211 NM_000691   | ALDH3A1 | 1 |
| hsa-miR-1211 NM_000691   | ALDH3A1 | 1 |
| hsa-miR-24-3j NM_0011351 | ALDH3A1 | 1 |
| hsa-miR-25-5j NM_0011351 | ALDH3A1 | 1 |
| hsa-miR-92a-: NM_0011351 | ALDH3A1 | 1 |
| hsa-miR-197-: NM_0011351 | ALDH3A1 | 1 |
| hsa-miR-125a NM_0011351  | ALDH3A1 | 1 |
| hsa-miR-320a NM_0011351  | ALDH3A1 | 1 |
| hsa-miR-106b NM_0011351  | ALDH3A1 | 1 |
| hsa-miR-505-: NM_0011351 | ALDH3A1 | 1 |
| hsa-miR-564 NM_0011351   | ALDH3A1 | 1 |
| hsa-miR-320b NM_0011351  | ALDH3A1 | 1 |
| hsa-miR-675-: NM_0011351 | ALDH3A1 | 1 |

|                        |            |            |            |
|------------------------|------------|------------|------------|
| hsa-miR-873-NM_0011351 | ALDH3A1    | 1          |            |
| hsa-miR-1178           | NM_0011351 | ALDH3A1    | 1          |
| hsa-miR-1293           | NM_0011351 | ALDH3A1    | 1          |
| hsa-miR-3141           | NM_0011351 | ALDH3A1    | 1          |
| hsa-miR-3141           | NM_0011351 | ALDH3A1    | 1          |
| hsa-miR-3175           | NM_0011351 | ALDH3A1    | 1          |
| hsa-miR-3192           | NM_0011351 | ALDH3A1    | 1          |
| hsa-miR-4302           | NM_0011351 | ALDH3A1    | 1          |
| hsa-miR-4316           | NM_0011351 | ALDH3A1    | 1          |
| hsa-miR-3621           | NM_0011351 | ALDH3A1    | 1          |
| hsa-miR-3916           | NM_0011351 | ALDH3A1    | 1          |
| hsa-miR-3945           | NM_0011351 | ALDH3A1    | 1          |
| hsa-miR-4425           | NM_0011351 | ALDH3A1    | 1          |
| hsa-miR-4433           | NM_0011351 | ALDH3A1    | 1          |
| hsa-miR-4450           | NM_0011351 | ALDH3A1    | 1          |
| hsa-miR-4466           | NM_0011351 | ALDH3A1    | 1          |
| hsa-miR-4486           | NM_0011351 | ALDH3A1    | 1          |
| hsa-miR-4505           | NM_0011351 | ALDH3A1    | 1          |
| hsa-miR-4527           | NM_0011351 | ALDH3A1    | 1          |
| hsa-miR-4685           | NM_0011351 | ALDH3A1    | 1          |
| hsa-miR-4690           | NM_0011351 | ALDH3A1    | 1          |
| hsa-miR-4723           | NM_0011351 | ALDH3A1    | 1          |
| hsa-miR-4761           | NM_0011351 | ALDH3A1    | 1          |
| hsa-miR-4804           | NM_0011351 | ALDH3A1    | 1          |
| hsa-miR-5194           | NM_0011351 | ALDH3A1    | 1          |
| hsa-miR-5572           | NM_0011351 | ALDH3A1    | 1          |
| hsa-miR-5735           | NM_0011351 | ALDH3A1    | 1          |
| hsa-miR-5787           | NM_0011351 | ALDH3A1    | 1          |
| hsa-miR-6085           | NM_0011351 | ALDH3A1    | 1          |
| hsa-miR-6086           | NM_0011351 | ALDH3A1    | 1          |
| hsa-miR-6165           | NM_0011351 | ALDH3A1    | 1          |
| hsa-miR-6515           | NM_0011351 | ALDH3A1    | 1          |
| hsa-miR-6717           | NM_0011351 | ALDH3A1    | 1          |
| hsa-miR-6726           | NM_0011351 | ALDH3A1    | 1          |
| hsa-miR-6726           | NM_0011351 | ALDH3A1    | 1          |
| hsa-miR-6745           | NM_0011351 | ALDH3A1    | 1          |
| hsa-miR-6751           | NM_0011351 | ALDH3A1    | 1          |
| hsa-miR-6756           | NM_0011351 | ALDH3A1    | 1          |
| hsa-miR-6757           | NM_0011351 | ALDH3A1    | 1          |
| hsa-miR-6766           | NM_0011351 | ALDH3A1    | 1          |
| hsa-miR-6773           | NM_0011351 | ALDH3A1    | 1          |
| hsa-miR-6777           | NM_0011351 | ALDH3A1    | 1          |
| hsa-miR-6775           | NM_0011351 | ALDH3A1    | 1          |
| hsa-miR-6788           | NM_0011351 | ALDH3A1    | 1          |
| hsa-miR-6785           | NM_0011351 | ALDH3A1    | 1          |
| hsa-miR-6842           | NM_0011351 | ALDH3A1    | 1          |
| hsa-miR-6848           | NM_0011351 | ALDH3A1    | 1          |
| hsa-miR-6861           | NM_0011351 | ALDH3A1    | 1          |
| hsa-miR-6865           | NM_0011351 | ALDH3A1    | 1          |
| hsa-miR-7155           | NM_0011351 | ALDH3A1    | 1          |
| hsa-miR-1273           | NM_0011351 | ALDH3A1    | 1          |
| hsa-miR-1035           | NM_0011351 | ALDH3A1    | 1          |
| hsa-miR-1211           | NM_0011351 | ALDH3A1    | 1          |
| hsa-miR-24-3j          | NM_0011351 | ALDH3A1    | 1          |
| hsa-miR-25-5j          | NM_0011351 | ALDH3A1    | 1          |
| hsa-miR-149-           | NM_0011351 | ALDH3A1    | 1          |
| hsa-miR-3116           | NM_0011351 | ALDH3A1    | 1          |
| hsa-miR-3151           | NM_0011351 | ALDH3A1    | 1          |
| hsa-miR-4255           | NM_0011351 | ALDH3A1    | 1          |
| hsa-miR-4483           | NM_0011351 | ALDH3A1    | 1          |
| hsa-miR-4505           | NM_0011351 | ALDH3A1    | 1          |
| hsa-miR-1587           | NM_0011351 | ALDH3A1    | 1          |
| hsa-miR-6080           | NM_0011351 | ALDH3A1    | 1          |
| hsa-miR-6721           | NM_0011351 | ALDH3A1    | 1          |
| hsa-miR-6756           | NM_0011351 | ALDH3A1    | 1          |
| hsa-miR-6777           | NM_0011351 | ALDH3A1    | 1          |
| hsa-miR-6775           | NM_0011351 | ALDH3A1    | 1          |
| hsa-miR-7155           | NM_0011351 | ALDH3A1    | 1          |
| hsa-miR-578            | NM_0013191 | CYP4B1     | 0.95384615 |
| hsa-miR-578            | NM_000779  | CYP4B1     | 0.95384615 |
| hsa-miR-578            | NM_0010997 | CYP4B1     | 0.95384615 |
| hsa-miR-490-XM_0115408 | CYP4B1     | 0.96153846 |            |
| hsa-miR-324-NM_0013191 | CYP4B1     | 0.96153846 |            |
| hsa-miR-596            | NM_0013191 | CYP4B1     | 0.96153846 |
| hsa-miR-1908           | NM_0013191 | CYP4B1     | 0.96153846 |
| hsa-miR-6762           | NM_0013191 | CYP4B1     | 0.96153846 |
| hsa-miR-324-NM_000779  | CYP4B1     | 0.96153846 |            |
| hsa-miR-596            | NM_000779  | CYP4B1     | 0.96153846 |
| hsa-miR-1908           | NM_000779  | CYP4B1     | 0.96153846 |
| hsa-miR-6762           | NM_000779  | CYP4B1     | 0.96153846 |
| hsa-miR-324-NM_0010997 | CYP4B1     | 0.96153846 |            |
| hsa-miR-596            | NM_0010997 | CYP4B1     | 0.96153846 |
| hsa-miR-1908           | NM_0010997 | CYP4B1     | 0.96153846 |
| hsa-miR-6762           | NM_0010997 | CYP4B1     | 0.96153846 |
| hsa-miR-544t           | XM_0115408 | CYP4B1     | 0.97435897 |
| hsa-miR-1233           | NM_0013191 | CYP4B1     | 0.97435897 |
| hsa-miR-1233           | NM_000779  | CYP4B1     | 0.97435897 |
| hsa-miR-1233           | NM_0010997 | CYP4B1     | 0.97435897 |
| hsa-miR-6078           | NM_0013191 | CYP4B1     | 0.98076923 |
| hsa-miR-6078           | NM_000779  | CYP4B1     | 0.98076923 |
| hsa-miR-6078           | NM_0010997 | CYP4B1     | 0.98076923 |
| hsa-miR-132-XM_0115408 | CYP4B1     | 1          |            |
| hsa-miR-361-XM_0115408 | CYP4B1     | 1          |            |
| hsa-miR-1285           | XM_0115408 | CYP4B1     | 1          |

|                                 |   |
|---------------------------------|---|
| hsa-miR-548c XM_0115408 CYP4B1  | 1 |
| hsa-miR-3621 XM_0115408 CYP4B1  | 1 |
| hsa-miR-3652 XM_0115408 CYP4B1  | 1 |
| hsa-miR-3655 XM_0115408 CYP4B1  | 1 |
| hsa-miR-3936 XM_0115408 CYP4B1  | 1 |
| hsa-miR-378h XM_0115408 CYP4B1  | 1 |
| hsa-miR-4467 XM_0115408 CYP4B1  | 1 |
| hsa-miR-4436 XM_0115408 CYP4B1  | 1 |
| hsa-miR-6847 XM_0115408 CYP4B1  | 1 |
| hsa-miR-1273 XM_0115408 CYP4B1  | 1 |
| hsa-miR-28-5j NM_0013191 CYP4B1 | 1 |
| hsa-miR-205- NM_0013191 CYP4B1  | 1 |
| hsa-miR-124- NM_0013191 CYP4B1  | 1 |
| hsa-miR-326 NM_0013191 CYP4B1   | 1 |
| hsa-miR-483- NM_0013191 CYP4B1  | 1 |
| hsa-miR-146b NM_0013191 CYP4B1  | 1 |
| hsa-miR-520a NM_0013191 CYP4B1  | 1 |
| hsa-miR-525- NM_0013191 CYP4B1  | 1 |
| hsa-miR-532- NM_0013191 CYP4B1  | 1 |
| hsa-miR-584- NM_0013191 CYP4B1  | 1 |
| hsa-miR-615- NM_0013191 CYP4B1  | 1 |
| hsa-miR-627- NM_0013191 CYP4B1  | 1 |
| hsa-miR-549a NM_0013191 CYP4B1  | 1 |
| hsa-miR-550a NM_0013191 CYP4B1  | 1 |
| hsa-miR-1296 NM_0013191 CYP4B1  | 1 |
| hsa-miR-1271 NM_0013191 CYP4B1  | 1 |
| hsa-miR-770- NM_0013191 CYP4B1  | 1 |
| hsa-miR-891a NM_0013191 CYP4B1  | 1 |
| hsa-miR-1182 NM_0013191 CYP4B1  | 1 |
| hsa-miR-1200 NM_0013191 CYP4B1  | 1 |
| hsa-miR-1200 NM_0013191 CYP4B1  | 1 |
| hsa-miR-663b NM_0013191 CYP4B1  | 1 |
| hsa-miR-3175 NM_0013191 CYP4B1  | 1 |
| hsa-miR-3180 NM_0013191 CYP4B1  | 1 |
| hsa-miR-4269 NM_0013191 CYP4B1  | 1 |
| hsa-miR-4277 NM_0013191 CYP4B1  | 1 |
| hsa-miR-4292 NM_0013191 CYP4B1  | 1 |
| hsa-miR-3615 NM_0013191 CYP4B1  | 1 |
| hsa-miR-3688 NM_0013191 CYP4B1  | 1 |
| hsa-miR-3907 NM_0013191 CYP4B1  | 1 |
| hsa-miR-676- NM_0013191 CYP4B1  | 1 |
| hsa-miR-4441 NM_0013191 CYP4B1  | 1 |
| hsa-miR-4482 NM_0013191 CYP4B1  | 1 |
| hsa-miR-4484 NM_0013191 CYP4B1  | 1 |
| hsa-miR-3975 NM_0013191 CYP4B1  | 1 |
| hsa-miR-4656 NM_0013191 CYP4B1  | 1 |
| hsa-miR-4687 NM_0013191 CYP4B1  | 1 |
| hsa-miR-1343 NM_0013191 CYP4B1  | 1 |
| hsa-miR-4710 NM_0013191 CYP4B1  | 1 |
| hsa-miR-4735 NM_0013191 CYP4B1  | 1 |
| hsa-miR-4756 NM_0013191 CYP4B1  | 1 |
| hsa-miR-4780 NM_0013191 CYP4B1  | 1 |
| hsa-miR-4797 NM_0013191 CYP4B1  | 1 |
| hsa-miR-5004 NM_0013191 CYP4B1  | 1 |
| hsa-miR-5684 NM_0013191 CYP4B1  | 1 |
| hsa-miR-5681 NM_0013191 CYP4B1  | 1 |
| hsa-miR-6736 NM_0013191 CYP4B1  | 1 |
| hsa-miR-6742 NM_0013191 CYP4B1  | 1 |
| hsa-miR-6774 NM_0013191 CYP4B1  | 1 |
| hsa-miR-6784 NM_0013191 CYP4B1  | 1 |
| hsa-miR-6798 NM_0013191 CYP4B1  | 1 |
| hsa-miR-6834 NM_0013191 CYP4B1  | 1 |
| hsa-miR-6889 NM_0013191 CYP4B1  | 1 |
| hsa-miR-8485 NM_0013191 CYP4B1  | 1 |
| hsa-miR-1211 NM_0013191 CYP4B1  | 1 |
| hsa-miR-28-5j NM_000779 CYP4B1  | 1 |
| hsa-miR-205- NM_000779 CYP4B1   | 1 |
| hsa-miR-124- NM_000779 CYP4B1   | 1 |
| hsa-miR-296- NM_000779 CYP4B1   | 1 |
| hsa-miR-326 NM_000779 CYP4B1    | 1 |
| hsa-miR-483- NM_000779 CYP4B1   | 1 |
| hsa-miR-520a NM_000779 CYP4B1   | 1 |
| hsa-miR-532- NM_000779 CYP4B1   | 1 |
| hsa-miR-584- NM_000779 CYP4B1   | 1 |
| hsa-miR-615- NM_000779 CYP4B1   | 1 |
| hsa-miR-627- NM_000779 CYP4B1   | 1 |
| hsa-miR-549a NM_000779 CYP4B1   | 1 |
| hsa-miR-550a NM_000779 CYP4B1   | 1 |
| hsa-miR-1296 NM_000779 CYP4B1   | 1 |
| hsa-miR-1271 NM_000779 CYP4B1   | 1 |
| hsa-miR-770- NM_000779 CYP4B1   | 1 |
| hsa-miR-891a NM_000779 CYP4B1   | 1 |
| hsa-miR-939- NM_000779 CYP4B1   | 1 |
| hsa-miR-1182 NM_000779 CYP4B1   | 1 |
| hsa-miR-1200 NM_000779 CYP4B1   | 1 |
| hsa-miR-1200 NM_000779 CYP4B1   | 1 |
| hsa-miR-663b NM_000779 CYP4B1   | 1 |
| hsa-miR-3175 NM_000779 CYP4B1   | 1 |
| hsa-miR-3180 NM_000779 CYP4B1   | 1 |
| hsa-miR-4269 NM_000779 CYP4B1   | 1 |
| hsa-miR-4277 NM_000779 CYP4B1   | 1 |
| hsa-miR-4279 NM_000779 CYP4B1   | 1 |
| hsa-miR-3615 NM_000779 CYP4B1   | 1 |
| hsa-miR-3688 NM_000779 CYP4B1   | 1 |

|                          |        |            |
|--------------------------|--------|------------|
| hsa-miR-3907 NM_000779   | CYP4B1 | 1          |
| hsa-miR-676- NM_000779   | CYP4B1 | 1          |
| hsa-miR-4441 NM_000779   | CYP4B1 | 1          |
| hsa-miR-4482 NM_000779   | CYP4B1 | 1          |
| hsa-miR-4484 NM_000779   | CYP4B1 | 1          |
| hsa-miR-3975 NM_000779   | CYP4B1 | 1          |
| hsa-miR-4656 NM_000779   | CYP4B1 | 1          |
| hsa-miR-4687 NM_000779   | CYP4B1 | 1          |
| hsa-miR-1343 NM_000779   | CYP4B1 | 1          |
| hsa-miR-471C NM_000779   | CYP4B1 | 1          |
| hsa-miR-4735 NM_000779   | CYP4B1 | 1          |
| hsa-miR-4756 NM_000779   | CYP4B1 | 1          |
| hsa-miR-478C NM_000779   | CYP4B1 | 1          |
| hsa-miR-4797 NM_000779   | CYP4B1 | 1          |
| hsa-miR-5004 NM_000779   | CYP4B1 | 1          |
| hsa-miR-5684 NM_000779   | CYP4B1 | 1          |
| hsa-miR-5681 NM_000779   | CYP4B1 | 1          |
| hsa-miR-6736 NM_000779   | CYP4B1 | 1          |
| hsa-miR-6742 NM_000779   | CYP4B1 | 1          |
| hsa-miR-6774 NM_000779   | CYP4B1 | 1          |
| hsa-miR-6784 NM_000779   | CYP4B1 | 1          |
| hsa-miR-6798 NM_000779   | CYP4B1 | 1          |
| hsa-miR-6834 NM_000779   | CYP4B1 | 1          |
| hsa-miR-6885 NM_000779   | CYP4B1 | 1          |
| hsa-miR-8485 NM_000779   | CYP4B1 | 1          |
| hsa-miR-1211 NM_000779   | CYP4B1 | 1          |
| hsa-miR-28-5j NM_0010997 | CYP4B1 | 1          |
| hsa-miR-205- NM_0010997  | CYP4B1 | 1          |
| hsa-miR-124- NM_0010997  | CYP4B1 | 1          |
| hsa-miR-296- NM_0010997  | CYP4B1 | 1          |
| hsa-miR-326 NM_0010997   | CYP4B1 | 1          |
| hsa-miR-483- NM_0010997  | CYP4B1 | 1          |
| hsa-miR-146t NM_0010997  | CYP4B1 | 1          |
| hsa-miR-520a NM_0010997  | CYP4B1 | 1          |
| hsa-miR-532- NM_0010997  | CYP4B1 | 1          |
| hsa-miR-584- NM_0010997  | CYP4B1 | 1          |
| hsa-miR-615- NM_0010997  | CYP4B1 | 1          |
| hsa-miR-627- NM_0010997  | CYP4B1 | 1          |
| hsa-miR-549a NM_0010997  | CYP4B1 | 1          |
| hsa-miR-550a NM_0010997  | CYP4B1 | 1          |
| hsa-miR-1296 NM_0010997  | CYP4B1 | 1          |
| hsa-miR-1271 NM_0010997  | CYP4B1 | 1          |
| hsa-miR-770- NM_0010997  | CYP4B1 | 1          |
| hsa-miR-891a NM_0010997  | CYP4B1 | 1          |
| hsa-miR-939- NM_0010997  | CYP4B1 | 1          |
| hsa-miR-1182 NM_0010997  | CYP4B1 | 1          |
| hsa-miR-120C NM_0010997  | CYP4B1 | 1          |
| hsa-miR-120C NM_0010997  | CYP4B1 | 1          |
| hsa-miR-663t NM_0010997  | CYP4B1 | 1          |
| hsa-miR-3175 NM_0010997  | CYP4B1 | 1          |
| hsa-miR-318C NM_0010997  | CYP4B1 | 1          |
| hsa-miR-4269 NM_0010997  | CYP4B1 | 1          |
| hsa-miR-4277 NM_0010997  | CYP4B1 | 1          |
| hsa-miR-4275 NM_0010997  | CYP4B1 | 1          |
| hsa-miR-4292 NM_0010997  | CYP4B1 | 1          |
| hsa-miR-3615 NM_0010997  | CYP4B1 | 1          |
| hsa-miR-3688 NM_0010997  | CYP4B1 | 1          |
| hsa-miR-3907 NM_0010997  | CYP4B1 | 1          |
| hsa-miR-676- NM_0010997  | CYP4B1 | 1          |
| hsa-miR-4441 NM_0010997  | CYP4B1 | 1          |
| hsa-miR-4482 NM_0010997  | CYP4B1 | 1          |
| hsa-miR-4484 NM_0010997  | CYP4B1 | 1          |
| hsa-miR-3975 NM_0010997  | CYP4B1 | 1          |
| hsa-miR-4656 NM_0010997  | CYP4B1 | 1          |
| hsa-miR-4687 NM_0010997  | CYP4B1 | 1          |
| hsa-miR-1343 NM_0010997  | CYP4B1 | 1          |
| hsa-miR-471C NM_0010997  | CYP4B1 | 1          |
| hsa-miR-4735 NM_0010997  | CYP4B1 | 1          |
| hsa-miR-4756 NM_0010997  | CYP4B1 | 1          |
| hsa-miR-478C NM_0010997  | CYP4B1 | 1          |
| hsa-miR-4797 NM_0010997  | CYP4B1 | 1          |
| hsa-miR-5004 NM_0010997  | CYP4B1 | 1          |
| hsa-miR-5684 NM_0010997  | CYP4B1 | 1          |
| hsa-miR-5681 NM_0010997  | CYP4B1 | 1          |
| hsa-miR-6736 NM_0010997  | CYP4B1 | 1          |
| hsa-miR-6742 NM_0010997  | CYP4B1 | 1          |
| hsa-miR-6774 NM_0010997  | CYP4B1 | 1          |
| hsa-miR-6784 NM_0010997  | CYP4B1 | 1          |
| hsa-miR-6798 NM_0010997  | CYP4B1 | 1          |
| hsa-miR-6834 NM_0010997  | CYP4B1 | 1          |
| hsa-miR-6885 NM_0010997  | CYP4B1 | 1          |
| hsa-miR-8485 NM_0010997  | CYP4B1 | 1          |
| hsa-miR-1211 NM_0010997  | CYP4B1 | 1          |
| hsa-miR-6845 NM_000954   | PTGDS  | 0.97435897 |
| hsa-miR-150- NM_000954   | PTGDS  | 1          |
| hsa-miR-514a NM_000954   | PTGDS  | 1          |
| hsa-miR-769- NM_000954   | PTGDS  | 1          |
| hsa-miR-892t NM_000954   | PTGDS  | 1          |
| hsa-miR-3161 NM_000954   | PTGDS  | 1          |
| hsa-miR-3178 NM_000954   | PTGDS  | 1          |
| hsa-miR-3202 NM_000954   | PTGDS  | 1          |
| hsa-miR-4257 NM_000954   | PTGDS  | 1          |
| hsa-miR-3622 NM_000954   | PTGDS  | 1          |
| hsa-miR-318C NM_000954   | PTGDS  | 1          |



|                         |       |            |
|-------------------------|-------|------------|
| hsa-miR-4467 NM_000954  | PTGDS | 1          |
| hsa-miR-4496 NM_000954  | PTGDS | 1          |
| hsa-miR-4534 NM_000954  | PTGDS | 1          |
| hsa-miR-466C NM_000954  | PTGDS | 1          |
| hsa-miR-4717 NM_000954  | PTGDS | 1          |
| hsa-miR-475C NM_000954  | PTGDS | 1          |
| hsa-miR-4796 NM_000954  | PTGDS | 1          |
| hsa-miR-5088 NM_000954  | PTGDS | 1          |
| hsa-miR-5187 NM_000954  | PTGDS | 1          |
| hsa-miR-675S NM_000954  | PTGDS | 1          |
| hsa-miR-678C NM_000954  | PTGDS | 1          |
| hsa-miR-6813 NM_000954  | PTGDS | 1          |
| hsa-miR-6813 NM_000954  | PTGDS | 1          |
| hsa-miR-6824 NM_000954  | PTGDS | 1          |
| hsa-miR-6846 NM_000954  | PTGDS | 1          |
| hsa-miR-6855 NM_000954  | PTGDS | 1          |
| hsa-miR-6877 NM_000954  | PTGDS | 1          |
| hsa-miR-7106 NM_000954  | PTGDS | 1          |
| hsa-miR-8071 NM_000954  | PTGDS | 1          |
| hsa-miR-104C NM_000954  | PTGDS | 1          |
| hsa-miR-1212 NM_000954  | PTGDS | 1          |
| hsa-miR-143- NM_000963  | PTGS2 | 0.95384615 |
| hsa-miR-1304 NM_000963  | PTGS2 | 0.95384615 |
| hsa-miR-4681 NM_000963  | PTGS2 | 0.95384615 |
| hsa-miR-6793 NM_000963  | PTGS2 | 0.95384615 |
| hsa-miR-23b- NM_000963  | PTGS2 | 0.96153846 |
| hsa-miR-185- NM_000963  | PTGS2 | 0.96153846 |
| hsa-miR-323a NM_000963  | PTGS2 | 0.96153846 |
| hsa-miR-196b NM_000963  | PTGS2 | 0.96153846 |
| hsa-miR-410- NM_000963  | PTGS2 | 0.96153846 |
| hsa-miR-571 NM_000963   | PTGS2 | 0.96153846 |
| hsa-miR-577 NM_000963   | PTGS2 | 0.96153846 |
| hsa-miR-597- NM_000963  | PTGS2 | 0.96153846 |
| hsa-miR-1202 NM_000963  | PTGS2 | 0.96153846 |
| hsa-miR-190S NM_000963  | PTGS2 | 0.96153846 |
| hsa-miR-3713 NM_000963  | PTGS2 | 0.96153846 |
| hsa-miR-4638 NM_000963  | PTGS2 | 0.96153846 |
| hsa-miR-5004 NM_000963  | PTGS2 | 0.96153846 |
| hsa-miR-675S NM_000963  | PTGS2 | 0.96153846 |
| hsa-miR-677C NM_000963  | PTGS2 | 0.96153846 |
| hsa-miR-113S NM_000963  | PTGS2 | 0.96153846 |
| hsa-miR-4303 NM_000963  | PTGS2 | 0.97435897 |
| hsa-miR-15a- NM_000963  | PTGS2 | 1          |
| hsa-miR-17-3j NM_000963 | PTGS2 | 1          |
| hsa-miR-26b- NM_000963  | PTGS2 | 1          |
| hsa-miR-96-3j NM_000963 | PTGS2 | 1          |
| hsa-miR-183- NM_000963  | PTGS2 | 1          |
| hsa-miR-214- NM_000963  | PTGS2 | 1          |
| hsa-miR-200c NM_000963  | PTGS2 | 1          |
| hsa-miR-200a NM_000963  | PTGS2 | 1          |
| hsa-miR-302c NM_000963  | PTGS2 | 1          |
| hsa-miR-376a NM_000963  | PTGS2 | 1          |
| hsa-miR-450a NM_000963  | PTGS2 | 1          |
| hsa-miR-485- NM_000963  | PTGS2 | 1          |
| hsa-miR-576- NM_000963  | PTGS2 | 1          |
| hsa-miR-598- NM_000963  | PTGS2 | 1          |
| hsa-miR-622 NM_000963   | PTGS2 | 1          |
| hsa-miR-33b- NM_000963  | PTGS2 | 1          |
| hsa-miR-635 NM_000963   | PTGS2 | 1          |
| hsa-miR-543 NM_000963   | PTGS2 | 1          |
| hsa-miR-216b NM_000963  | PTGS2 | 1          |
| hsa-miR-1287 NM_000963  | PTGS2 | 1          |
| hsa-miR-128S NM_000963  | PTGS2 | 1          |
| hsa-miR-1304 NM_000963  | PTGS2 | 1          |
| hsa-miR-1304 NM_000963  | PTGS2 | 1          |
| hsa-miR-1292 NM_000963  | PTGS2 | 1          |
| hsa-miR-1321 NM_000963  | PTGS2 | 1          |
| hsa-miR-1322 NM_000963  | PTGS2 | 1          |
| hsa-miR-1471 NM_000963  | PTGS2 | 1          |
| hsa-miR-153S NM_000963  | PTGS2 | 1          |
| hsa-miR-103b NM_000963  | PTGS2 | 1          |
| hsa-miR-190S NM_000963  | PTGS2 | 1          |
| hsa-miR-1911 NM_000963  | PTGS2 | 1          |
| hsa-miR-1911 NM_000963  | PTGS2 | 1          |
| hsa-miR-2117 NM_000963  | PTGS2 | 1          |
| hsa-miR-312C NM_000963  | PTGS2 | 1          |
| hsa-miR-548v NM_000963  | PTGS2 | 1          |
| hsa-miR-3154 NM_000963  | PTGS2 | 1          |
| hsa-miR-3155 NM_000963  | PTGS2 | 1          |
| hsa-miR-3157 NM_000963  | PTGS2 | 1          |
| hsa-miR-3158 NM_000963  | PTGS2 | 1          |
| hsa-miR-317C NM_000963  | PTGS2 | 1          |
| hsa-miR-3173 NM_000963  | PTGS2 | 1          |
| hsa-miR-3191 NM_000963  | PTGS2 | 1          |
| hsa-miR-4296 NM_000963  | PTGS2 | 1          |
| hsa-miR-4322 NM_000963  | PTGS2 | 1          |
| hsa-miR-4254 NM_000963  | PTGS2 | 1          |
| hsa-miR-4255 NM_000963  | PTGS2 | 1          |
| hsa-miR-429C NM_000963  | PTGS2 | 1          |
| hsa-miR-3677 NM_000963  | PTGS2 | 1          |
| hsa-miR-3681 NM_000963  | PTGS2 | 1          |
| hsa-miR-390S NM_000963  | PTGS2 | 1          |
| hsa-miR-676- NM_000963  | PTGS2 | 1          |
| hsa-miR-642b NM_000963  | PTGS2 | 1          |

|                         |       |            |
|-------------------------|-------|------------|
| hsa-miR-378g NM_000963  | PTGS2 | 1          |
| hsa-miR-548a NM_000963  | PTGS2 | 1          |
| hsa-miR-4464 NM_000963  | PTGS2 | 1          |
| hsa-miR-4474 NM_000963  | PTGS2 | 1          |
| hsa-miR-4475 NM_000963  | PTGS2 | 1          |
| hsa-miR-3155 NM_000963  | PTGS2 | 1          |
| hsa-miR-4497 NM_000963  | PTGS2 | 1          |
| hsa-miR-4498 NM_000963  | PTGS2 | 1          |
| hsa-miR-4504 NM_000963  | PTGS2 | 1          |
| hsa-miR-4515 NM_000963  | PTGS2 | 1          |
| hsa-miR-4538 NM_000963  | PTGS2 | 1          |
| hsa-miR-454C NM_000963  | PTGS2 | 1          |
| hsa-miR-4656 NM_000963  | PTGS2 | 1          |
| hsa-miR-4671 NM_000963  | PTGS2 | 1          |
| hsa-miR-4685 NM_000963  | PTGS2 | 1          |
| hsa-miR-4695 NM_000963  | PTGS2 | 1          |
| hsa-miR-4697 NM_000963  | PTGS2 | 1          |
| hsa-miR-470C NM_000963  | PTGS2 | 1          |
| hsa-miR-4712 NM_000963  | PTGS2 | 1          |
| hsa-miR-3525 NM_000963  | PTGS2 | 1          |
| hsa-miR-4733 NM_000963  | PTGS2 | 1          |
| hsa-miR-4761 NM_000963  | PTGS2 | 1          |
| hsa-miR-500C NM_000963  | PTGS2 | 1          |
| hsa-miR-5002 NM_000963  | PTGS2 | 1          |
| hsa-miR-664b NM_000963  | PTGS2 | 1          |
| hsa-miR-5581 NM_000963  | PTGS2 | 1          |
| hsa-miR-5584 NM_000963  | PTGS2 | 1          |
| hsa-miR-5585 NM_000963  | PTGS2 | 1          |
| hsa-miR-5693 NM_000963  | PTGS2 | 1          |
| hsa-miR-6501 NM_000963  | PTGS2 | 1          |
| hsa-miR-6743 NM_000963  | PTGS2 | 1          |
| hsa-miR-6746 NM_000963  | PTGS2 | 1          |
| hsa-miR-675C NM_000963  | PTGS2 | 1          |
| hsa-miR-6761 NM_000963  | PTGS2 | 1          |
| hsa-miR-6771 NM_000963  | PTGS2 | 1          |
| hsa-miR-6795 NM_000963  | PTGS2 | 1          |
| hsa-miR-6797 NM_000963  | PTGS2 | 1          |
| hsa-miR-6808 NM_000963  | PTGS2 | 1          |
| hsa-miR-682C NM_000963  | PTGS2 | 1          |
| hsa-miR-6831 NM_000963  | PTGS2 | 1          |
| hsa-miR-6834 NM_000963  | PTGS2 | 1          |
| hsa-miR-6837 NM_000963  | PTGS2 | 1          |
| hsa-miR-6838 NM_000963  | PTGS2 | 1          |
| hsa-miR-6841 NM_000963  | PTGS2 | 1          |
| hsa-miR-6847 NM_000963  | PTGS2 | 1          |
| hsa-miR-6853 NM_000963  | PTGS2 | 1          |
| hsa-miR-6882 NM_000963  | PTGS2 | 1          |
| hsa-miR-6885 NM_000963  | PTGS2 | 1          |
| hsa-miR-716C NM_000963  | PTGS2 | 1          |
| hsa-miR-1273 NM_000963  | PTGS2 | 1          |
| hsa-miR-1273 NM_000963  | PTGS2 | 1          |
| hsa-miR-7851 NM_000963  | PTGS2 | 1          |
| hsa-miR-7852 NM_000963  | PTGS2 | 1          |
| hsa-miR-7975 NM_000963  | PTGS2 | 1          |
| hsa-miR-7976 NM_000963  | PTGS2 | 1          |
| hsa-miR-8083 NM_000963  | PTGS2 | 1          |
| hsa-miR-990C NM_000963  | PTGS2 | 1          |
| hsa-miR-1211 NM_000963  | PTGS2 | 1          |
| hsa-miR-574-XM_0170116  | GPNMB | 0.96153846 |
| hsa-miR-4538 XM_0170116 | GPNMB | 0.96153846 |
| hsa-miR-574-NM_002510   | GPNMB | 0.96153846 |
| hsa-miR-4538 NM_002510  | GPNMB | 0.96153846 |
| hsa-miR-1039 NM_002510  | GPNMB | 0.96153846 |
| hsa-miR-574-NM_0010053  | GPNMB | 0.96153846 |
| hsa-miR-4538 NM_0010053 | GPNMB | 0.96153846 |
| hsa-miR-1039 NM_0010053 | GPNMB | 0.96153846 |
| hsa-miR-766-XM_0170116  | GPNMB | 0.97435897 |
| hsa-miR-6818 XM_0170116 | GPNMB | 0.97435897 |
| hsa-miR-6818 NM_002510  | GPNMB | 0.97435897 |
| hsa-miR-6818 NM_0010053 | GPNMB | 0.97435897 |
| hsa-miR-3135 XM_0170116 | GPNMB | 0.98076923 |
| hsa-miR-19a-XM_0170116  | GPNMB | 1          |
| hsa-miR-27a-XM_0170116  | GPNMB | 1          |
| hsa-miR-29b-XM_0170116  | GPNMB | 1          |
| hsa-miR-103a XM_0170116 | GPNMB | 1          |
| hsa-miR-107 XM_0170116  | GPNMB | 1          |
| hsa-miR-197-XM_0170116  | GPNMB | 1          |
| hsa-miR-129-XM_0170116  | GPNMB | 1          |
| hsa-miR-210-XM_0170116  | GPNMB | 1          |
| hsa-miR-215-XM_0170116  | GPNMB | 1          |
| hsa-miR-200b XM_0170116 | GPNMB | 1          |
| hsa-miR-143-XM_0170116  | GPNMB | 1          |
| hsa-miR-191-XM_0170116  | GPNMB | 1          |
| hsa-miR-195-XM_0170116  | GPNMB | 1          |
| hsa-miR-130b XM_0170116 | GPNMB | 1          |
| hsa-miR-382-XM_0170116  | GPNMB | 1          |
| hsa-miR-383-XM_0170116  | GPNMB | 1          |
| hsa-miR-342-XM_0170116  | GPNMB | 1          |
| hsa-miR-425-XM_0170116  | GPNMB | 1          |
| hsa-miR-20b-XM_0170116  | GPNMB | 1          |
| hsa-miR-20b-XM_0170116  | GPNMB | 1          |
| hsa-miR-431-XM_0170116  | GPNMB | 1          |
| hsa-miR-409-XM_0170116  | GPNMB | 1          |
| hsa-miR-512-XM_0170116  | GPNMB | 1          |

|                        |            |      |   |
|------------------------|------------|------|---|
| hsa-miR-502-XM_0170116 | GPMB       | 1    |   |
| hsa-miR-502-XM_0170116 | GPMB       | 1    |   |
| hsa-miR-506-XM_0170116 | GPMB       | 1    |   |
| hsa-miR-595            | XM_0170116 | GPMB | 1 |
| hsa-miR-648            | XM_0170116 | GPMB | 1 |
| hsa-miR-659-XM_0170116 | GPMB       | 1    |   |
| hsa-miR-668-XM_0170116 | GPMB       | 1    |   |
| hsa-miR-1468           | XM_0170116 | GPMB | 1 |
| hsa-miR-765            | XM_0170116 | GPMB | 1 |
| hsa-miR-874-XM_0170116 | GPMB       | 1    |   |
| hsa-miR-889-XM_0170116 | GPMB       | 1    |   |
| hsa-miR-873-XM_0170116 | GPMB       | 1    |   |
| hsa-miR-1303           | XM_0170116 | GPMB | 1 |
| hsa-miR-1251           | XM_0170116 | GPMB | 1 |
| hsa-miR-1267           | XM_0170116 | GPMB | 1 |
| hsa-miR-1281           | XM_0170116 | GPMB | 1 |
| hsa-miR-513b           | XM_0170116 | GPMB | 1 |
| hsa-miR-1976           | XM_0170116 | GPMB | 1 |
| hsa-miR-2117           | XM_0170116 | GPMB | 1 |
| hsa-miR-312C           | XM_0170116 | GPMB | 1 |
| hsa-miR-3157           | XM_0170116 | GPMB | 1 |
| hsa-miR-3188           | XM_0170116 | GPMB | 1 |
| hsa-miR-318S           | XM_0170116 | GPMB | 1 |
| hsa-miR-3196           | XM_0170116 | GPMB | 1 |
| hsa-miR-430C           | XM_0170116 | GPMB | 1 |
| hsa-miR-4302           | XM_0170116 | GPMB | 1 |
| hsa-miR-4322           | XM_0170116 | GPMB | 1 |
| hsa-miR-4252           | XM_0170116 | GPMB | 1 |
| hsa-miR-2355           | XM_0170116 | GPMB | 1 |
| hsa-miR-500b           | XM_0170116 | GPMB | 1 |
| hsa-miR-3616           | XM_0170116 | GPMB | 1 |
| hsa-miR-3667           | XM_0170116 | GPMB | 1 |
| hsa-miR-368C           | XM_0170116 | GPMB | 1 |
| hsa-miR-3681           | XM_0170116 | GPMB | 1 |
| hsa-miR-3685           | XM_0170116 | GPMB | 1 |
| hsa-miR-368S           | XM_0170116 | GPMB | 1 |
| hsa-miR-3907           | XM_0170116 | GPMB | 1 |
| hsa-miR-3913           | XM_0170116 | GPMB | 1 |
| hsa-miR-3917           | XM_0170116 | GPMB | 1 |
| hsa-miR-442S           | XM_0170116 | GPMB | 1 |
| hsa-miR-443C           | XM_0170116 | GPMB | 1 |
| hsa-miR-4433           | XM_0170116 | GPMB | 1 |
| hsa-miR-4438           | XM_0170116 | GPMB | 1 |
| hsa-miR-4441           | XM_0170116 | GPMB | 1 |
| hsa-miR-4447           | XM_0170116 | GPMB | 1 |
| hsa-miR-4462           | XM_0170116 | GPMB | 1 |
| hsa-miR-4465           | XM_0170116 | GPMB | 1 |
| hsa-miR-4483           | XM_0170116 | GPMB | 1 |
| hsa-miR-2392           | XM_0170116 | GPMB | 1 |
| hsa-miR-452S           | XM_0170116 | GPMB | 1 |
| hsa-miR-4536           | XM_0170116 | GPMB | 1 |
| hsa-miR-4644           | XM_0170116 | GPMB | 1 |
| hsa-miR-4645           | XM_0170116 | GPMB | 1 |
| hsa-miR-4646           | XM_0170116 | GPMB | 1 |
| hsa-miR-4646           | XM_0170116 | GPMB | 1 |
| hsa-miR-4667           | XM_0170116 | GPMB | 1 |
| hsa-miR-4694           | XM_0170116 | GPMB | 1 |
| hsa-miR-4697           | XM_0170116 | GPMB | 1 |
| hsa-miR-4712           | XM_0170116 | GPMB | 1 |
| hsa-miR-4715           | XM_0170116 | GPMB | 1 |
| hsa-miR-4724           | XM_0170116 | GPMB | 1 |
| hsa-miR-4727           | XM_0170116 | GPMB | 1 |
| hsa-miR-4731           | XM_0170116 | GPMB | 1 |
| hsa-miR-4738           | XM_0170116 | GPMB | 1 |
| hsa-miR-4754           | XM_0170116 | GPMB | 1 |
| hsa-miR-4762           | XM_0170116 | GPMB | 1 |
| hsa-miR-4797           | XM_0170116 | GPMB | 1 |
| hsa-miR-5003           | XM_0170116 | GPMB | 1 |
| hsa-miR-5011           | XM_0170116 | GPMB | 1 |
| hsa-miR-5197           | XM_0170116 | GPMB | 1 |
| hsa-miR-5708           | XM_0170116 | GPMB | 1 |
| hsa-miR-606S           | XM_0170116 | GPMB | 1 |
| hsa-miR-6165           | XM_0170116 | GPMB | 1 |
| hsa-miR-6501           | XM_0170116 | GPMB | 1 |
| hsa-miR-6511           | XM_0170116 | GPMB | 1 |
| hsa-miR-6715           | XM_0170116 | GPMB | 1 |
| hsa-miR-673S           | XM_0170116 | GPMB | 1 |
| hsa-miR-6742           | XM_0170116 | GPMB | 1 |
| hsa-miR-6748           | XM_0170116 | GPMB | 1 |
| hsa-miR-6752           | XM_0170116 | GPMB | 1 |
| hsa-miR-6755           | XM_0170116 | GPMB | 1 |
| hsa-miR-6758           | XM_0170116 | GPMB | 1 |
| hsa-miR-676C           | XM_0170116 | GPMB | 1 |
| hsa-miR-6765           | XM_0170116 | GPMB | 1 |
| hsa-miR-6775           | XM_0170116 | GPMB | 1 |
| hsa-miR-6804           | XM_0170116 | GPMB | 1 |
| hsa-miR-6804           | XM_0170116 | GPMB | 1 |
| hsa-miR-6805           | XM_0170116 | GPMB | 1 |
| hsa-miR-6825           | XM_0170116 | GPMB | 1 |
| hsa-miR-6827           | XM_0170116 | GPMB | 1 |
| hsa-miR-6834           | XM_0170116 | GPMB | 1 |
| hsa-miR-6838           | XM_0170116 | GPMB | 1 |
| hsa-miR-6842           | XM_0170116 | GPMB | 1 |
| hsa-miR-676S           | XM_0170116 | GPMB | 1 |

|                         |      |   |
|-------------------------|------|---|
| hsa-miR-6864 XM_0170116 | GPMB | 1 |
| hsa-miR-687C XM_0170116 | GPMB | 1 |
| hsa-miR-6872 XM_0170116 | GPMB | 1 |
| hsa-miR-687E XM_0170116 | GPMB | 1 |
| hsa-miR-6882 XM_0170116 | GPMB | 1 |
| hsa-miR-6883 XM_0170116 | GPMB | 1 |
| hsa-miR-688E XM_0170116 | GPMB | 1 |
| hsa-miR-689C XM_0170116 | GPMB | 1 |
| hsa-miR-6894 XM_0170116 | GPMB | 1 |
| hsa-miR-7106 XM_0170116 | GPMB | 1 |
| hsa-miR-7108 XM_0170116 | GPMB | 1 |
| hsa-miR-7111 XM_0170116 | GPMB | 1 |
| hsa-miR-7113 XM_0170116 | GPMB | 1 |
| hsa-miR-7114 XM_0170116 | GPMB | 1 |
| hsa-miR-7154 XM_0170116 | GPMB | 1 |
| hsa-miR-7158 XM_0170116 | GPMB | 1 |
| hsa-miR-785C XM_0170116 | GPMB | 1 |
| hsa-miR-9718 XM_0170116 | GPMB | 1 |
| hsa-miR-998E XM_0170116 | GPMB | 1 |
| hsa-miR-103S XM_0170116 | GPMB | 1 |
| hsa-miR-104C XM_0170116 | GPMB | 1 |
| hsa-miR-1211 XM_0170116 | GPMB | 1 |
| hsa-miR-19b-; NM_002510 | GPMB | 1 |
| hsa-miR-27a-; NM_002510 | GPMB | 1 |
| hsa-miR-197-; NM_002510 | GPMB | 1 |
| hsa-miR-210-; NM_002510 | GPMB | 1 |
| hsa-miR-215-; NM_002510 | GPMB | 1 |
| hsa-miR-200b; NM_002510 | GPMB | 1 |
| hsa-miR-382-; NM_002510 | GPMB | 1 |
| hsa-miR-383-; NM_002510 | GPMB | 1 |
| hsa-miR-342-; NM_002510 | GPMB | 1 |
| hsa-miR-425-; NM_002510 | GPMB | 1 |
| hsa-miR-409-; NM_002510 | GPMB | 1 |
| hsa-miR-512-; NM_002510 | GPMB | 1 |
| hsa-miR-520d; NM_002510 | GPMB | 1 |
| hsa-miR-502-; NM_002510 | GPMB | 1 |
| hsa-miR-506-; NM_002510 | GPMB | 1 |
| hsa-miR-642a; NM_002510 | GPMB | 1 |
| hsa-miR-659-; NM_002510 | GPMB | 1 |
| hsa-miR-668-; NM_002510 | GPMB | 1 |
| hsa-miR-1468; NM_002510 | GPMB | 1 |
| hsa-miR-1271; NM_002510 | GPMB | 1 |
| hsa-miR-1301; NM_002510 | GPMB | 1 |
| hsa-miR-765; NM_002510  | GPMB | 1 |
| hsa-miR-891a; NM_002510 | GPMB | 1 |
| hsa-miR-889-; NM_002510 | GPMB | 1 |
| hsa-miR-147b; NM_002510 | GPMB | 1 |
| hsa-miR-873-; NM_002510 | GPMB | 1 |
| hsa-miR-1183; NM_002510 | GPMB | 1 |
| hsa-miR-1236; NM_002510 | GPMB | 1 |
| hsa-miR-1251; NM_002510 | GPMB | 1 |
| hsa-miR-1267; NM_002510 | GPMB | 1 |
| hsa-miR-1976; NM_002510 | GPMB | 1 |
| hsa-miR-2682; NM_002510 | GPMB | 1 |
| hsa-miR-3116; NM_002510 | GPMB | 1 |
| hsa-miR-3132; NM_002510 | GPMB | 1 |
| hsa-miR-3157; NM_002510 | GPMB | 1 |
| hsa-miR-3177; NM_002510 | GPMB | 1 |
| hsa-miR-3182; NM_002510 | GPMB | 1 |
| hsa-miR-3188; NM_002510 | GPMB | 1 |
| hsa-miR-318S; NM_002510 | GPMB | 1 |
| hsa-miR-3196; NM_002510 | GPMB | 1 |
| hsa-miR-3202; NM_002510 | GPMB | 1 |
| hsa-miR-4322; NM_002510 | GPMB | 1 |
| hsa-miR-4265; NM_002510 | GPMB | 1 |
| hsa-miR-2355; NM_002510 | GPMB | 1 |
| hsa-miR-368C; NM_002510 | GPMB | 1 |
| hsa-miR-3681; NM_002510 | GPMB | 1 |
| hsa-miR-3685; NM_002510 | GPMB | 1 |
| hsa-miR-3907; NM_002510 | GPMB | 1 |
| hsa-miR-3917; NM_002510 | GPMB | 1 |
| hsa-miR-443C; NM_002510 | GPMB | 1 |
| hsa-miR-4438; NM_002510 | GPMB | 1 |
| hsa-miR-4441; NM_002510 | GPMB | 1 |
| hsa-miR-3135; NM_002510 | GPMB | 1 |
| hsa-miR-4462; NM_002510 | GPMB | 1 |
| hsa-miR-4465; NM_002510 | GPMB | 1 |
| hsa-miR-368S; NM_002510 | GPMB | 1 |
| hsa-miR-2392; NM_002510 | GPMB | 1 |
| hsa-miR-4536; NM_002510 | GPMB | 1 |
| hsa-miR-4644; NM_002510 | GPMB | 1 |
| hsa-miR-464S; NM_002510 | GPMB | 1 |
| hsa-miR-4694; NM_002510 | GPMB | 1 |
| hsa-miR-4697; NM_002510 | GPMB | 1 |
| hsa-miR-4712; NM_002510 | GPMB | 1 |
| hsa-miR-4715; NM_002510 | GPMB | 1 |
| hsa-miR-4724; NM_002510 | GPMB | 1 |
| hsa-miR-4738; NM_002510 | GPMB | 1 |
| hsa-miR-4762; NM_002510 | GPMB | 1 |
| hsa-miR-4797; NM_002510 | GPMB | 1 |
| hsa-miR-4797; NM_002510 | GPMB | 1 |
| hsa-miR-4804; NM_002510 | GPMB | 1 |
| hsa-miR-5011; NM_002510 | GPMB | 1 |
| hsa-miR-5087; NM_002510 | GPMB | 1 |

|              |            |       |   |
|--------------|------------|-------|---|
| hsa-miR-5089 | NM_002510  | GPNMB | 1 |
| hsa-miR-5197 | NM_002510  | GPNMB | 1 |
| hsa-miR-5580 | NM_002510  | GPNMB | 1 |
| hsa-miR-5708 | NM_002510  | GPNMB | 1 |
| hsa-miR-6069 | NM_002510  | GPNMB | 1 |
| hsa-miR-6165 | NM_002510  | GPNMB | 1 |
| hsa-miR-6499 | NM_002510  | GPNMB | 1 |
| hsa-miR-6501 | NM_002510  | GPNMB | 1 |
| hsa-miR-6510 | NM_002510  | GPNMB | 1 |
| hsa-miR-6511 | NM_002510  | GPNMB | 1 |
| hsa-miR-6738 | NM_002510  | GPNMB | 1 |
| hsa-miR-6739 | NM_002510  | GPNMB | 1 |
| hsa-miR-6740 | NM_002510  | GPNMB | 1 |
| hsa-miR-6748 | NM_002510  | GPNMB | 1 |
| hsa-miR-6752 | NM_002510  | GPNMB | 1 |
| hsa-miR-6758 | NM_002510  | GPNMB | 1 |
| hsa-miR-6760 | NM_002510  | GPNMB | 1 |
| hsa-miR-6765 | NM_002510  | GPNMB | 1 |
| hsa-miR-6804 | NM_002510  | GPNMB | 1 |
| hsa-miR-6805 | NM_002510  | GPNMB | 1 |
| hsa-miR-6807 | NM_002510  | GPNMB | 1 |
| hsa-miR-6825 | NM_002510  | GPNMB | 1 |
| hsa-miR-6827 | NM_002510  | GPNMB | 1 |
| hsa-miR-6834 | NM_002510  | GPNMB | 1 |
| hsa-miR-6838 | NM_002510  | GPNMB | 1 |
| hsa-miR-6769 | NM_002510  | GPNMB | 1 |
| hsa-miR-6864 | NM_002510  | GPNMB | 1 |
| hsa-miR-6864 | NM_002510  | GPNMB | 1 |
| hsa-miR-6870 | NM_002510  | GPNMB | 1 |
| hsa-miR-6872 | NM_002510  | GPNMB | 1 |
| hsa-miR-6879 | NM_002510  | GPNMB | 1 |
| hsa-miR-6883 | NM_002510  | GPNMB | 1 |
| hsa-miR-6886 | NM_002510  | GPNMB | 1 |
| hsa-miR-6890 | NM_002510  | GPNMB | 1 |
| hsa-miR-6894 | NM_002510  | GPNMB | 1 |
| hsa-miR-7106 | NM_002510  | GPNMB | 1 |
| hsa-miR-7108 | NM_002510  | GPNMB | 1 |
| hsa-miR-7110 | NM_002510  | GPNMB | 1 |
| hsa-miR-7111 | NM_002510  | GPNMB | 1 |
| hsa-miR-7113 | NM_002510  | GPNMB | 1 |
| hsa-miR-7114 | NM_002510  | GPNMB | 1 |
| hsa-miR-7151 | NM_002510  | GPNMB | 1 |
| hsa-miR-7154 | NM_002510  | GPNMB | 1 |
| hsa-miR-7843 | NM_002510  | GPNMB | 1 |
| hsa-miR-7850 | NM_002510  | GPNMB | 1 |
| hsa-miR-9718 | NM_002510  | GPNMB | 1 |
| hsa-miR-9986 | NM_002510  | GPNMB | 1 |
| hsa-miR-1211 | NM_002510  | GPNMB | 1 |
| hsa-miR-19b- | NM_0010053 | GPNMB | 1 |
| hsa-miR-27a- | NM_0010053 | GPNMB | 1 |
| hsa-miR-197- | NM_0010053 | GPNMB | 1 |
| hsa-miR-210- | NM_0010053 | GPNMB | 1 |
| hsa-miR-215- | NM_0010053 | GPNMB | 1 |
| hsa-miR-200b | NM_0010053 | GPNMB | 1 |
| hsa-miR-382- | NM_0010053 | GPNMB | 1 |
| hsa-miR-383- | NM_0010053 | GPNMB | 1 |
| hsa-miR-342- | NM_0010053 | GPNMB | 1 |
| hsa-miR-425- | NM_0010053 | GPNMB | 1 |
| hsa-miR-409- | NM_0010053 | GPNMB | 1 |
| hsa-miR-512- | NM_0010053 | GPNMB | 1 |
| hsa-miR-520d | NM_0010053 | GPNMB | 1 |
| hsa-miR-502- | NM_0010053 | GPNMB | 1 |
| hsa-miR-506- | NM_0010053 | GPNMB | 1 |
| hsa-miR-642a | NM_0010053 | GPNMB | 1 |
| hsa-miR-659- | NM_0010053 | GPNMB | 1 |
| hsa-miR-668- | NM_0010053 | GPNMB | 1 |
| hsa-miR-1468 | NM_0010053 | GPNMB | 1 |
| hsa-miR-1271 | NM_0010053 | GPNMB | 1 |
| hsa-miR-765  | NM_0010053 | GPNMB | 1 |
| hsa-miR-891a | NM_0010053 | GPNMB | 1 |
| hsa-miR-889- | NM_0010053 | GPNMB | 1 |
| hsa-miR-147b | NM_0010053 | GPNMB | 1 |
| hsa-miR-873- | NM_0010053 | GPNMB | 1 |
| hsa-miR-1183 | NM_0010053 | GPNMB | 1 |
| hsa-miR-1236 | NM_0010053 | GPNMB | 1 |
| hsa-miR-1251 | NM_0010053 | GPNMB | 1 |
| hsa-miR-1267 | NM_0010053 | GPNMB | 1 |
| hsa-miR-1976 | NM_0010053 | GPNMB | 1 |
| hsa-miR-2682 | NM_0010053 | GPNMB | 1 |
| hsa-miR-3116 | NM_0010053 | GPNMB | 1 |
| hsa-miR-3132 | NM_0010053 | GPNMB | 1 |
| hsa-miR-3157 | NM_0010053 | GPNMB | 1 |
| hsa-miR-3177 | NM_0010053 | GPNMB | 1 |
| hsa-miR-3182 | NM_0010053 | GPNMB | 1 |
| hsa-miR-3188 | NM_0010053 | GPNMB | 1 |
| hsa-miR-3189 | NM_0010053 | GPNMB | 1 |
| hsa-miR-3196 | NM_0010053 | GPNMB | 1 |
| hsa-miR-3202 | NM_0010053 | GPNMB | 1 |
| hsa-miR-4322 | NM_0010053 | GPNMB | 1 |
| hsa-miR-4265 | NM_0010053 | GPNMB | 1 |
| hsa-miR-2355 | NM_0010053 | GPNMB | 1 |
| hsa-miR-3680 | NM_0010053 | GPNMB | 1 |
| hsa-miR-3681 | NM_0010053 | GPNMB | 1 |
| hsa-miR-3685 | NM_0010053 | GPNMB | 1 |

|                               |            |
|-------------------------------|------------|
| hsa-miR-3907 NM_0010053 GPNMB | 1          |
| hsa-miR-3917 NM_0010053 GPNMB | 1          |
| hsa-miR-4430 NM_0010053 GPNMB | 1          |
| hsa-miR-4438 NM_0010053 GPNMB | 1          |
| hsa-miR-4441 NM_0010053 GPNMB | 1          |
| hsa-miR-3135 NM_0010053 GPNMB | 1          |
| hsa-miR-4462 NM_0010053 GPNMB | 1          |
| hsa-miR-4465 NM_0010053 GPNMB | 1          |
| hsa-miR-3685 NM_0010053 GPNMB | 1          |
| hsa-miR-2392 NM_0010053 GPNMB | 1          |
| hsa-miR-4536 NM_0010053 GPNMB | 1          |
| hsa-miR-4644 NM_0010053 GPNMB | 1          |
| hsa-miR-4645 NM_0010053 GPNMB | 1          |
| hsa-miR-4694 NM_0010053 GPNMB | 1          |
| hsa-miR-4697 NM_0010053 GPNMB | 1          |
| hsa-miR-4712 NM_0010053 GPNMB | 1          |
| hsa-miR-4715 NM_0010053 GPNMB | 1          |
| hsa-miR-4724 NM_0010053 GPNMB | 1          |
| hsa-miR-4738 NM_0010053 GPNMB | 1          |
| hsa-miR-4762 NM_0010053 GPNMB | 1          |
| hsa-miR-4797 NM_0010053 GPNMB | 1          |
| hsa-miR-4797 NM_0010053 GPNMB | 1          |
| hsa-miR-4804 NM_0010053 GPNMB | 1          |
| hsa-miR-5011 NM_0010053 GPNMB | 1          |
| hsa-miR-5087 NM_0010053 GPNMB | 1          |
| hsa-miR-5197 NM_0010053 GPNMB | 1          |
| hsa-miR-5580 NM_0010053 GPNMB | 1          |
| hsa-miR-5708 NM_0010053 GPNMB | 1          |
| hsa-miR-6065 NM_0010053 GPNMB | 1          |
| hsa-miR-6165 NM_0010053 GPNMB | 1          |
| hsa-miR-6495 NM_0010053 GPNMB | 1          |
| hsa-miR-6501 NM_0010053 GPNMB | 1          |
| hsa-miR-6510 NM_0010053 GPNMB | 1          |
| hsa-miR-6511 NM_0010053 GPNMB | 1          |
| hsa-miR-6738 NM_0010053 GPNMB | 1          |
| hsa-miR-6739 NM_0010053 GPNMB | 1          |
| hsa-miR-6740 NM_0010053 GPNMB | 1          |
| hsa-miR-6748 NM_0010053 GPNMB | 1          |
| hsa-miR-6752 NM_0010053 GPNMB | 1          |
| hsa-miR-6758 NM_0010053 GPNMB | 1          |
| hsa-miR-6760 NM_0010053 GPNMB | 1          |
| hsa-miR-6765 NM_0010053 GPNMB | 1          |
| hsa-miR-6804 NM_0010053 GPNMB | 1          |
| hsa-miR-6805 NM_0010053 GPNMB | 1          |
| hsa-miR-6807 NM_0010053 GPNMB | 1          |
| hsa-miR-6825 NM_0010053 GPNMB | 1          |
| hsa-miR-6827 NM_0010053 GPNMB | 1          |
| hsa-miR-6834 NM_0010053 GPNMB | 1          |
| hsa-miR-6838 NM_0010053 GPNMB | 1          |
| hsa-miR-6765 NM_0010053 GPNMB | 1          |
| hsa-miR-6864 NM_0010053 GPNMB | 1          |
| hsa-miR-6864 NM_0010053 GPNMB | 1          |
| hsa-miR-6870 NM_0010053 GPNMB | 1          |
| hsa-miR-6872 NM_0010053 GPNMB | 1          |
| hsa-miR-6875 NM_0010053 GPNMB | 1          |
| hsa-miR-6883 NM_0010053 GPNMB | 1          |
| hsa-miR-6886 NM_0010053 GPNMB | 1          |
| hsa-miR-6890 NM_0010053 GPNMB | 1          |
| hsa-miR-6894 NM_0010053 GPNMB | 1          |
| hsa-miR-7106 NM_0010053 GPNMB | 1          |
| hsa-miR-7108 NM_0010053 GPNMB | 1          |
| hsa-miR-7110 NM_0010053 GPNMB | 1          |
| hsa-miR-7111 NM_0010053 GPNMB | 1          |
| hsa-miR-7113 NM_0010053 GPNMB | 1          |
| hsa-miR-7114 NM_0010053 GPNMB | 1          |
| hsa-miR-7151 NM_0010053 GPNMB | 1          |
| hsa-miR-7154 NM_0010053 GPNMB | 1          |
| hsa-miR-7843 NM_0010053 GPNMB | 1          |
| hsa-miR-7850 NM_0010053 GPNMB | 1          |
| hsa-miR-9718 NM_0010053 GPNMB | 1          |
| hsa-miR-9986 NM_0010053 GPNMB | 1          |
| hsa-miR-1211 NM_0010053 GPNMB | 1          |
| hsa-miR-7108 NM_175738 RAB37  | 0.95384615 |
| hsa-miR-7108 NM_0013304 RAB37 | 0.95384615 |
| hsa-miR-7108 NM_0010066 RAB37 | 0.95384615 |
| hsa-miR-7108 NM_0011639 RAB37 | 0.95384615 |
| hsa-miR-7108 NM_0011639 RAB37 | 0.95384615 |
| hsa-miR-6750 NM_175738 RAB37  | 0.95512821 |
| hsa-miR-6750 NM_0013304 RAB37 | 0.95512821 |
| hsa-miR-6750 NM_0010066 RAB37 | 0.95512821 |
| hsa-miR-6750 NM_0011639 RAB37 | 0.95512821 |
| hsa-miR-6750 NM_0011639 RAB37 | 0.95512821 |
| hsa-miR-668- NM_175738 RAB37  | 0.96153846 |
| hsa-miR-1271 NM_175738 RAB37  | 0.96153846 |
| hsa-miR-1231 NM_175738 RAB37  | 0.96153846 |
| hsa-miR-1276 NM_175738 RAB37  | 0.96153846 |
| hsa-miR-2117 NM_175738 RAB37  | 0.96153846 |
| hsa-miR-3177 NM_175738 RAB37  | 0.96153846 |
| hsa-miR-4286 NM_175738 RAB37  | 0.96153846 |
| hsa-miR-4516 NM_175738 RAB37  | 0.96153846 |
| hsa-miR-1343 NM_175738 RAB37  | 0.96153846 |
| hsa-miR-5695 NM_175738 RAB37  | 0.96153846 |
| hsa-miR-6751 NM_175738 RAB37  | 0.96153846 |
| hsa-miR-6775 NM_175738 RAB37  | 0.96153846 |

|                               |            |
|-------------------------------|------------|
| hsa-miR-6894 NM_175738 RAB37  | 0.96153846 |
| hsa-miR-7161 NM_175738 RAB37  | 0.96153846 |
| hsa-miR-668- NM_0013304 RAB37 | 0.96153846 |
| hsa-miR-1271 NM_0013304 RAB37 | 0.96153846 |
| hsa-miR-1276 NM_0013304 RAB37 | 0.96153846 |
| hsa-miR-2117 NM_0013304 RAB37 | 0.96153846 |
| hsa-miR-4286 NM_0013304 RAB37 | 0.96153846 |
| hsa-miR-4516 NM_0013304 RAB37 | 0.96153846 |
| hsa-miR-4638 NM_0013304 RAB37 | 0.96153846 |
| hsa-miR-1343 NM_0013304 RAB37 | 0.96153846 |
| hsa-miR-4710 NM_0013304 RAB37 | 0.96153846 |
| hsa-miR-5695 NM_0013304 RAB37 | 0.96153846 |
| hsa-miR-6751 NM_0013304 RAB37 | 0.96153846 |
| hsa-miR-6775 NM_0013304 RAB37 | 0.96153846 |
| hsa-miR-7161 NM_0013304 RAB37 | 0.96153846 |
| hsa-miR-668- NM_0010066 RAB37 | 0.96153846 |
| hsa-miR-1271 NM_0010066 RAB37 | 0.96153846 |
| hsa-miR-1276 NM_0010066 RAB37 | 0.96153846 |
| hsa-miR-2117 NM_0010066 RAB37 | 0.96153846 |
| hsa-miR-4286 NM_0010066 RAB37 | 0.96153846 |
| hsa-miR-4516 NM_0010066 RAB37 | 0.96153846 |
| hsa-miR-4710 NM_0010066 RAB37 | 0.96153846 |
| hsa-miR-5695 NM_0010066 RAB37 | 0.96153846 |
| hsa-miR-6751 NM_0010066 RAB37 | 0.96153846 |
| hsa-miR-6775 NM_0010066 RAB37 | 0.96153846 |
| hsa-miR-7161 NM_0010066 RAB37 | 0.96153846 |
| hsa-miR-668- NM_0011639 RAB37 | 0.96153846 |
| hsa-miR-1271 NM_0011639 RAB37 | 0.96153846 |
| hsa-miR-1231 NM_0011639 RAB37 | 0.96153846 |
| hsa-miR-2117 NM_0011639 RAB37 | 0.96153846 |
| hsa-miR-3177 NM_0011639 RAB37 | 0.96153846 |
| hsa-miR-4286 NM_0011639 RAB37 | 0.96153846 |
| hsa-miR-4516 NM_0011639 RAB37 | 0.96153846 |
| hsa-miR-5695 NM_0011639 RAB37 | 0.96153846 |
| hsa-miR-6751 NM_0011639 RAB37 | 0.96153846 |
| hsa-miR-6775 NM_0011639 RAB37 | 0.96153846 |
| hsa-miR-6894 NM_0011639 RAB37 | 0.96153846 |
| hsa-miR-7161 NM_0011639 RAB37 | 0.96153846 |
| hsa-miR-668- NM_0011639 RAB37 | 0.96153846 |
| hsa-miR-1271 NM_0011639 RAB37 | 0.96153846 |
| hsa-miR-1276 NM_0011639 RAB37 | 0.96153846 |
| hsa-miR-2117 NM_0011639 RAB37 | 0.96153846 |
| hsa-miR-4286 NM_0011639 RAB37 | 0.96153846 |
| hsa-miR-4516 NM_0011639 RAB37 | 0.96153846 |
| hsa-miR-4710 NM_0011639 RAB37 | 0.96153846 |
| hsa-miR-5695 NM_0011639 RAB37 | 0.96153846 |
| hsa-miR-6751 NM_0011639 RAB37 | 0.96153846 |
| hsa-miR-6775 NM_0011639 RAB37 | 0.96153846 |
| hsa-miR-7161 NM_0011639 RAB37 | 0.96153846 |
| hsa-miR-490- NM_175738 RAB37  | 0.96923077 |
| hsa-miR-490- NM_0013304 RAB37 | 0.96923077 |
| hsa-miR-4516 NM_0013304 RAB37 | 0.96923077 |
| hsa-miR-490- NM_0010066 RAB37 | 0.96923077 |
| hsa-miR-4516 NM_0010066 RAB37 | 0.96923077 |
| hsa-miR-490- NM_0011639 RAB37 | 0.96923077 |
| hsa-miR-490- NM_0011639 RAB37 | 0.96923077 |
| hsa-miR-4516 NM_0011639 RAB37 | 0.96923077 |
| hsa-miR-942- NM_175738 RAB37  | 0.97435897 |
| hsa-miR-1260 NM_175738 RAB37  | 0.97435897 |
| hsa-miR-3135 NM_175738 RAB37  | 0.97435897 |
| hsa-miR-4650 NM_175738 RAB37  | 0.97435897 |
| hsa-miR-4713 NM_175738 RAB37  | 0.97435897 |
| hsa-miR-6133 NM_175738 RAB37  | 0.97435897 |
| hsa-miR-1022 NM_175738 RAB37  | 0.97435897 |
| hsa-miR-518a NM_0013304 RAB37 | 0.97435897 |
| hsa-miR-942- NM_0013304 RAB37 | 0.97435897 |
| hsa-miR-1260 NM_0013304 RAB37 | 0.97435897 |
| hsa-miR-1292 NM_0013304 RAB37 | 0.97435897 |
| hsa-miR-3135 NM_0013304 RAB37 | 0.97435897 |
| hsa-miR-4650 NM_0013304 RAB37 | 0.97435897 |
| hsa-miR-4713 NM_0013304 RAB37 | 0.97435897 |
| hsa-miR-6133 NM_0013304 RAB37 | 0.97435897 |
| hsa-miR-1022 NM_0013304 RAB37 | 0.97435897 |
| hsa-miR-518a NM_0010066 RAB37 | 0.97435897 |
| hsa-miR-942- NM_0010066 RAB37 | 0.97435897 |
| hsa-miR-1260 NM_0010066 RAB37 | 0.97435897 |
| hsa-miR-1292 NM_0010066 RAB37 | 0.97435897 |
| hsa-miR-4650 NM_0010066 RAB37 | 0.97435897 |
| hsa-miR-4713 NM_0010066 RAB37 | 0.97435897 |
| hsa-miR-6133 NM_0010066 RAB37 | 0.97435897 |
| hsa-miR-6802 NM_0010066 RAB37 | 0.97435897 |
| hsa-miR-1022 NM_0010066 RAB37 | 0.97435897 |
| hsa-miR-518a NM_0011639 RAB37 | 0.97435897 |
| hsa-miR-942- NM_0011639 RAB37 | 0.97435897 |
| hsa-miR-1260 NM_0011639 RAB37 | 0.97435897 |
| hsa-miR-3135 NM_0011639 RAB37 | 0.97435897 |
| hsa-miR-4650 NM_0011639 RAB37 | 0.97435897 |
| hsa-miR-4713 NM_0011639 RAB37 | 0.97435897 |
| hsa-miR-6133 NM_0011639 RAB37 | 0.97435897 |
| hsa-miR-1022 NM_0011639 RAB37 | 0.97435897 |
| hsa-miR-518a NM_0011639 RAB37 | 0.97435897 |
| hsa-miR-942- NM_0011639 RAB37 | 0.97435897 |
| hsa-miR-1260 NM_0011639 RAB37 | 0.97435897 |
| hsa-miR-1292 NM_0011639 RAB37 | 0.97435897 |

|                                |            |
|--------------------------------|------------|
| hsa-miR-4650 NM_0011639 RAB37  | 0.97435897 |
| hsa-miR-4713 NM_0011639 RAB37  | 0.97435897 |
| hsa-miR-6133 NM_0011639 RAB37  | 0.97435897 |
| hsa-miR-6802 NM_0011639 RAB37  | 0.97435897 |
| hsa-miR-1022 NM_0011639 RAB37  | 0.97435897 |
| hsa-let-7d-5p NM_175738 RAB37  | 0.98076923 |
| hsa-miR-604 NM_175738 RAB37    | 0.98076923 |
| hsa-miR-4510 NM_175738 RAB37   | 0.98076923 |
| hsa-miR-5010 NM_175738 RAB37   | 0.98076923 |
| hsa-miR-5698 NM_175738 RAB37   | 0.98076923 |
| hsa-miR-6075 NM_175738 RAB37   | 0.98076923 |
| hsa-miR-6132 NM_175738 RAB37   | 0.98076923 |
| hsa-miR-6828 NM_175738 RAB37   | 0.98076923 |
| hsa-let-7d-5p NM_0013304 RAB37 | 0.98076923 |
| hsa-miR-604 NM_0013304 RAB37   | 0.98076923 |
| hsa-miR-4510 NM_0013304 RAB37  | 0.98076923 |
| hsa-miR-5010 NM_0013304 RAB37  | 0.98076923 |
| hsa-miR-5698 NM_0013304 RAB37  | 0.98076923 |
| hsa-miR-6075 NM_0013304 RAB37  | 0.98076923 |
| hsa-miR-6132 NM_0013304 RAB37  | 0.98076923 |
| hsa-miR-6828 NM_0013304 RAB37  | 0.98076923 |
| hsa-let-7d-5p NM_0010066 RAB37 | 0.98076923 |
| hsa-miR-604 NM_0010066 RAB37   | 0.98076923 |
| hsa-miR-4510 NM_0010066 RAB37  | 0.98076923 |
| hsa-miR-6075 NM_0010066 RAB37  | 0.98076923 |
| hsa-miR-6828 NM_0010066 RAB37  | 0.98076923 |
| hsa-let-7d-5p NM_0011639 RAB37 | 0.98076923 |
| hsa-miR-604 NM_0011639 RAB37   | 0.98076923 |
| hsa-miR-4510 NM_0011639 RAB37  | 0.98076923 |
| hsa-miR-6075 NM_0011639 RAB37  | 0.98076923 |
| hsa-miR-6828 NM_0011639 RAB37  | 0.98076923 |
| hsa-let-7d-5p NM_0011639 RAB37 | 0.98076923 |
| hsa-miR-604 NM_0011639 RAB37   | 0.98076923 |
| hsa-miR-4510 NM_0011639 RAB37  | 0.98076923 |
| hsa-miR-5010 NM_0011639 RAB37  | 0.98076923 |
| hsa-miR-6075 NM_0011639 RAB37  | 0.98076923 |
| hsa-miR-6828 NM_0011639 RAB37  | 0.98076923 |
| hsa-miR-15a- NM_175738 RAB37   | 1          |
| hsa-miR-18a- NM_175738 RAB37   | 1          |
| hsa-miR-18a- NM_175738 RAB37   | 1          |
| hsa-miR-18a- NM_175738 RAB37   | 1          |
| hsa-miR-23a- NM_175738 RAB37   | 1          |
| hsa-miR-25-5j NM_175738 RAB37  | 1          |
| hsa-miR-25-5j NM_175738 RAB37  | 1          |
| hsa-miR-27a- NM_175738 RAB37   | 1          |
| hsa-miR-27a- NM_175738 RAB37   | 1          |
| hsa-miR-28-3j NM_175738 RAB37  | 1          |
| hsa-miR-103a NM_175738 RAB37   | 1          |
| hsa-miR-103a NM_175738 RAB37   | 1          |
| hsa-miR-103a NM_175738 RAB37   | 1          |
| hsa-miR-197- NM_175738 RAB37   | 1          |
| hsa-miR-197- NM_175738 RAB37   | 1          |
| hsa-miR-208a NM_175738 RAB37   | 1          |
| hsa-miR-182- NM_175738 RAB37   | 1          |
| hsa-miR-196a NM_175738 RAB37   | 1          |
| hsa-miR-204- NM_175738 RAB37   | 1          |
| hsa-miR-212- NM_175738 RAB37   | 1          |
| hsa-miR-222- NM_175738 RAB37   | 1          |
| hsa-miR-224- NM_175738 RAB37   | 1          |
| hsa-miR-200b NM_175738 RAB37   | 1          |
| hsa-miR-15b- NM_175738 RAB37   | 1          |
| hsa-miR-30b- NM_175738 RAB37   | 1          |
| hsa-miR-135a NM_175738 RAB37   | 1          |
| hsa-miR-125a NM_175738 RAB37   | 1          |
| hsa-miR-125b NM_175738 RAB37   | 1          |
| hsa-miR-149- NM_175738 RAB37   | 1          |
| hsa-miR-149- NM_175738 RAB37   | 1          |
| hsa-miR-150- NM_175738 RAB37   | 1          |
| hsa-miR-150- NM_175738 RAB37   | 1          |
| hsa-miR-185- NM_175738 RAB37   | 1          |
| hsa-miR-186- NM_175738 RAB37   | 1          |
| hsa-miR-188- NM_175738 RAB37   | 1          |
| hsa-miR-320a NM_175738 RAB37   | 1          |
| hsa-miR-200c NM_175738 RAB37   | 1          |
| hsa-miR-128- NM_175738 RAB37   | 1          |
| hsa-miR-106b NM_175738 RAB37   | 1          |
| hsa-miR-30c- NM_175738 RAB37   | 1          |
| hsa-miR-299- NM_175738 RAB37   | 1          |
| hsa-miR-296- NM_175738 RAB37   | 1          |
| hsa-miR-361- NM_175738 RAB37   | 1          |
| hsa-miR-361- NM_175738 RAB37   | 1          |
| hsa-miR-361- NM_175738 RAB37   | 1          |
| hsa-miR-302c NM_175738 RAB37   | 1          |
| hsa-miR-367- NM_175738 RAB37   | 1          |
| hsa-miR-376a NM_175738 RAB37   | 1          |
| hsa-miR-135t NM_175738 RAB37   | 1          |
| hsa-miR-331- NM_175738 RAB37   | 1          |
| hsa-miR-331- NM_175738 RAB37   | 1          |
| hsa-miR-423- NM_175738 RAB37   | 1          |
| hsa-miR-18b- NM_175738 RAB37   | 1          |
| hsa-miR-18b- NM_175738 RAB37   | 1          |
| hsa-miR-483- NM_175738 RAB37   | 1          |
| hsa-miR-202- NM_175738 RAB37   | 1          |
| hsa-miR-202- NM_175738 RAB37   | 1          |



|                        |       |   |
|------------------------|-------|---|
| hsa-miR-493-NM_175738  | RAB37 | 1 |
| hsa-miR-493-NM_175738  | RAB37 | 1 |
| hsa-miR-495-NM_175738  | RAB37 | 1 |
| hsa-miR-512-NM_175738  | RAB37 | 1 |
| hsa-miR-520e-NM_175738 | RAB37 | 1 |
| hsa-miR-504-NM_175738  | RAB37 | 1 |
| hsa-miR-504-NM_175738  | RAB37 | 1 |
| hsa-miR-505-NM_175738  | RAB37 | 1 |
| hsa-miR-505-NM_175738  | RAB37 | 1 |
| hsa-miR-508-NM_175738  | RAB37 | 1 |
| hsa-miR-509-NM_175738  | RAB37 | 1 |
| hsa-miR-514a-NM_175738 | RAB37 | 1 |
| hsa-miR-532-NM_175738  | RAB37 | 1 |
| hsa-miR-487b-NM_175738 | RAB37 | 1 |
| hsa-miR-554-NM_175738  | RAB37 | 1 |
| hsa-miR-92b-NM_175738  | RAB37 | 1 |
| hsa-miR-572-NM_175738  | RAB37 | 1 |
| hsa-miR-575-NM_175738  | RAB37 | 1 |
| hsa-miR-584-NM_175738  | RAB37 | 1 |
| hsa-miR-585-NM_175738  | RAB37 | 1 |
| hsa-miR-550a-NM_175738 | RAB37 | 1 |
| hsa-miR-596-NM_175738  | RAB37 | 1 |
| hsa-miR-610-NM_175738  | RAB37 | 1 |
| hsa-miR-611-NM_175738  | RAB37 | 1 |
| hsa-miR-614-NM_175738  | RAB37 | 1 |
| hsa-miR-615-NM_175738  | RAB37 | 1 |
| hsa-miR-622-NM_175738  | RAB37 | 1 |
| hsa-miR-630-NM_175738  | RAB37 | 1 |
| hsa-miR-632-NM_175738  | RAB37 | 1 |
| hsa-miR-635-NM_175738  | RAB37 | 1 |
| hsa-miR-642a-NM_175738 | RAB37 | 1 |
| hsa-miR-642a-NM_175738 | RAB37 | 1 |
| hsa-miR-648-NM_175738  | RAB37 | 1 |
| hsa-miR-652-NM_175738  | RAB37 | 1 |
| hsa-miR-656-NM_175738  | RAB37 | 1 |
| hsa-miR-656-NM_175738  | RAB37 | 1 |
| hsa-miR-658-NM_175738  | RAB37 | 1 |
| hsa-miR-320b-NM_175738 | RAB37 | 1 |
| hsa-miR-320c-NM_175738 | RAB37 | 1 |
| hsa-miR-1296-NM_175738 | RAB37 | 1 |
| hsa-miR-1301-NM_175738 | RAB37 | 1 |
| hsa-miR-766-NM_175738  | RAB37 | 1 |
| hsa-miR-1185-NM_175738 | RAB37 | 1 |
| hsa-miR-1298-NM_175738 | RAB37 | 1 |
| hsa-miR-761-NM_175738  | RAB37 | 1 |
| hsa-miR-764-NM_175738  | RAB37 | 1 |
| hsa-miR-770-NM_175738  | RAB37 | 1 |
| hsa-miR-675-NM_175738  | RAB37 | 1 |
| hsa-miR-298-NM_175738  | RAB37 | 1 |
| hsa-miR-450b-NM_175738 | RAB37 | 1 |
| hsa-miR-888-NM_175738  | RAB37 | 1 |
| hsa-miR-541-NM_175738  | RAB37 | 1 |
| hsa-miR-708-NM_175738  | RAB37 | 1 |
| hsa-miR-885-NM_175738  | RAB37 | 1 |
| hsa-miR-877-NM_175738  | RAB37 | 1 |
| hsa-miR-374b-NM_175738 | RAB37 | 1 |
| hsa-miR-760-NM_175738  | RAB37 | 1 |
| hsa-miR-920-NM_175738  | RAB37 | 1 |
| hsa-miR-920-NM_175738  | RAB37 | 1 |
| hsa-miR-920-NM_175738  | RAB37 | 1 |
| hsa-miR-937-NM_175738  | RAB37 | 1 |
| hsa-miR-939-NM_175738  | RAB37 | 1 |
| hsa-miR-1182-NM_175738 | RAB37 | 1 |
| hsa-miR-1225-NM_175738 | RAB37 | 1 |
| hsa-miR-1225-NM_175738 | RAB37 | 1 |
| hsa-miR-1227-NM_175738 | RAB37 | 1 |
| hsa-miR-1228-NM_175738 | RAB37 | 1 |
| hsa-miR-1233-NM_175738 | RAB37 | 1 |
| hsa-miR-1236-NM_175738 | RAB37 | 1 |
| hsa-miR-1237-NM_175738 | RAB37 | 1 |
| hsa-miR-1237-NM_175738 | RAB37 | 1 |
| hsa-miR-1238-NM_175738 | RAB37 | 1 |
| hsa-miR-1202-NM_175738 | RAB37 | 1 |
| hsa-miR-1202-NM_175738 | RAB37 | 1 |
| hsa-miR-1203-NM_175738 | RAB37 | 1 |
| hsa-miR-1207-NM_175738 | RAB37 | 1 |
| hsa-miR-1207-NM_175738 | RAB37 | 1 |
| hsa-miR-1207-NM_175738 | RAB37 | 1 |
| hsa-miR-1285-NM_175738 | RAB37 | 1 |
| hsa-miR-1287-NM_175738 | RAB37 | 1 |
| hsa-miR-1293-NM_175738 | RAB37 | 1 |
| hsa-miR-1295-NM_175738 | RAB37 | 1 |
| hsa-miR-1295-NM_175738 | RAB37 | 1 |
| hsa-miR-1304-NM_175738 | RAB37 | 1 |
| hsa-miR-1249-NM_175738 | RAB37 | 1 |
| hsa-miR-1256-NM_175738 | RAB37 | 1 |
| hsa-miR-1260-NM_175738 | RAB37 | 1 |
| hsa-miR-1266-NM_175738 | RAB37 | 1 |
| hsa-miR-1267-NM_175738 | RAB37 | 1 |
| hsa-miR-1270-NM_175738 | RAB37 | 1 |
| hsa-miR-1270-NM_175738 | RAB37 | 1 |

|                        |       |   |
|------------------------|-------|---|
| hsa-miR-1825 NM_175738 | RAB37 | 1 |
| hsa-miR-1908 NM_175738 | RAB37 | 1 |
| hsa-miR-1912 NM_175738 | RAB37 | 1 |
| hsa-miR-1913 NM_175738 | RAB37 | 1 |
| hsa-miR-1913 NM_175738 | RAB37 | 1 |
| hsa-miR-2116 NM_175738 | RAB37 | 1 |
| hsa-miR-2276 NM_175738 | RAB37 | 1 |
| hsa-miR-711 NM_175738  | RAB37 | 1 |
| hsa-miR-3119 NM_175738 | RAB37 | 1 |
| hsa-miR-3124 NM_175738 | RAB37 | 1 |
| hsa-miR-3126 NM_175738 | RAB37 | 1 |
| hsa-miR-3127 NM_175738 | RAB37 | 1 |
| hsa-miR-3127 NM_175738 | RAB37 | 1 |
| hsa-miR-3130 NM_175738 | RAB37 | 1 |
| hsa-miR-544t NM_175738 | RAB37 | 1 |
| hsa-miR-3137 NM_175738 | RAB37 | 1 |
| hsa-miR-3141 NM_175738 | RAB37 | 1 |
| hsa-miR-1273 NM_175738 | RAB37 | 1 |
| hsa-miR-1273 NM_175738 | RAB37 | 1 |
| hsa-miR-3152 NM_175738 | RAB37 | 1 |
| hsa-miR-3074 NM_175738 | RAB37 | 1 |
| hsa-miR-3154 NM_175738 | RAB37 | 1 |
| hsa-miR-3155 NM_175738 | RAB37 | 1 |
| hsa-miR-3156 NM_175738 | RAB37 | 1 |
| hsa-miR-3156 NM_175738 | RAB37 | 1 |
| hsa-miR-3157 NM_175738 | RAB37 | 1 |
| hsa-miR-3158 NM_175738 | RAB37 | 1 |
| hsa-miR-3160 NM_175738 | RAB37 | 1 |
| hsa-miR-3161 NM_175738 | RAB37 | 1 |
| hsa-miR-3162 NM_175738 | RAB37 | 1 |
| hsa-miR-3162 NM_175738 | RAB37 | 1 |
| hsa-miR-3166 NM_175738 | RAB37 | 1 |
| hsa-miR-3173 NM_175738 | RAB37 | 1 |
| hsa-miR-3173 NM_175738 | RAB37 | 1 |
| hsa-miR-323t NM_175738 | RAB37 | 1 |
| hsa-miR-3174 NM_175738 | RAB37 | 1 |
| hsa-miR-3176 NM_175738 | RAB37 | 1 |
| hsa-miR-3180 NM_175738 | RAB37 | 1 |
| hsa-miR-3187 NM_175738 | RAB37 | 1 |
| hsa-miR-3188 NM_175738 | RAB37 | 1 |
| hsa-miR-3190 NM_175738 | RAB37 | 1 |
| hsa-miR-3192 NM_175738 | RAB37 | 1 |
| hsa-miR-3192 NM_175738 | RAB37 | 1 |
| hsa-miR-3192 NM_175738 | RAB37 | 1 |
| hsa-miR-3195 NM_175738 | RAB37 | 1 |
| hsa-miR-4301 NM_175738 | RAB37 | 1 |
| hsa-miR-4298 NM_175738 | RAB37 | 1 |
| hsa-miR-4302 NM_175738 | RAB37 | 1 |
| hsa-miR-4308 NM_175738 | RAB37 | 1 |
| hsa-miR-4311 NM_175738 | RAB37 | 1 |
| hsa-miR-4312 NM_175738 | RAB37 | 1 |
| hsa-miR-4312 NM_175738 | RAB37 | 1 |
| hsa-miR-4313 NM_175738 | RAB37 | 1 |
| hsa-miR-4315 NM_175738 | RAB37 | 1 |
| hsa-miR-4314 NM_175738 | RAB37 | 1 |
| hsa-miR-4259 NM_175738 | RAB37 | 1 |
| hsa-miR-4259 NM_175738 | RAB37 | 1 |
| hsa-miR-4260 NM_175738 | RAB37 | 1 |
| hsa-miR-4254 NM_175738 | RAB37 | 1 |
| hsa-miR-4254 NM_175738 | RAB37 | 1 |
| hsa-miR-4326 NM_175738 | RAB37 | 1 |
| hsa-miR-4327 NM_175738 | RAB37 | 1 |
| hsa-miR-4265 NM_175738 | RAB37 | 1 |
| hsa-miR-4270 NM_175738 | RAB37 | 1 |
| hsa-miR-4287 NM_175738 | RAB37 | 1 |
| hsa-miR-4290 NM_175738 | RAB37 | 1 |
| hsa-miR-4290 NM_175738 | RAB37 | 1 |
| hsa-miR-3605 NM_175738 | RAB37 | 1 |
| hsa-miR-3615 NM_175738 | RAB37 | 1 |
| hsa-miR-3617 NM_175738 | RAB37 | 1 |
| hsa-miR-3619 NM_175738 | RAB37 | 1 |
| hsa-miR-3622 NM_175738 | RAB37 | 1 |
| hsa-miR-3622 NM_175738 | RAB37 | 1 |
| hsa-miR-3651 NM_175738 | RAB37 | 1 |
| hsa-miR-3667 NM_175738 | RAB37 | 1 |
| hsa-miR-3675 NM_175738 | RAB37 | 1 |
| hsa-miR-3681 NM_175738 | RAB37 | 1 |
| hsa-miR-3682 NM_175738 | RAB37 | 1 |
| hsa-miR-3692 NM_175738 | RAB37 | 1 |
| hsa-miR-3180 NM_175738 | RAB37 | 1 |
| hsa-miR-3180 NM_175738 | RAB37 | 1 |
| hsa-miR-3909 NM_175738 | RAB37 | 1 |
| hsa-miR-3911 NM_175738 | RAB37 | 1 |
| hsa-miR-3918 NM_175738 | RAB37 | 1 |
| hsa-miR-3150 NM_175738 | RAB37 | 1 |
| hsa-miR-3922 NM_175738 | RAB37 | 1 |
| hsa-miR-3922 NM_175738 | RAB37 | 1 |
| hsa-miR-3937 NM_175738 | RAB37 | 1 |
| hsa-miR-3937 NM_175738 | RAB37 | 1 |
| hsa-miR-642t NM_175738 | RAB37 | 1 |
| hsa-miR-642t NM_175738 | RAB37 | 1 |
| hsa-miR-550t NM_175738 | RAB37 | 1 |
| hsa-miR-1268 NM_175738 | RAB37 | 1 |
| hsa-miR-378f NM_175738 | RAB37 | 1 |







|                          |       |   |
|--------------------------|-------|---|
| hsa-miR-6883 NM_175738   | RAB37 | 1 |
| hsa-miR-6885 NM_175738   | RAB37 | 1 |
| hsa-miR-6886 NM_175738   | RAB37 | 1 |
| hsa-miR-6887 NM_175738   | RAB37 | 1 |
| hsa-miR-6887 NM_175738   | RAB37 | 1 |
| hsa-miR-6888 NM_175738   | RAB37 | 1 |
| hsa-miR-6889 NM_175738   | RAB37 | 1 |
| hsa-miR-6890 NM_175738   | RAB37 | 1 |
| hsa-miR-6891 NM_175738   | RAB37 | 1 |
| hsa-miR-6891 NM_175738   | RAB37 | 1 |
| hsa-miR-6893 NM_175738   | RAB37 | 1 |
| hsa-miR-6894 NM_175738   | RAB37 | 1 |
| hsa-miR-6895 NM_175738   | RAB37 | 1 |
| hsa-miR-7107 NM_175738   | RAB37 | 1 |
| hsa-miR-7109 NM_175738   | RAB37 | 1 |
| hsa-miR-7111 NM_175738   | RAB37 | 1 |
| hsa-miR-7113 NM_175738   | RAB37 | 1 |
| hsa-miR-7114 NM_175738   | RAB37 | 1 |
| hsa-miR-7114 NM_175738   | RAB37 | 1 |
| hsa-miR-7151 NM_175738   | RAB37 | 1 |
| hsa-miR-7152 NM_175738   | RAB37 | 1 |
| hsa-miR-7154 NM_175738   | RAB37 | 1 |
| hsa-miR-7156 NM_175738   | RAB37 | 1 |
| hsa-miR-7160 NM_175738   | RAB37 | 1 |
| hsa-miR-7843 NM_175738   | RAB37 | 1 |
| hsa-miR-4433 NM_175738   | RAB37 | 1 |
| hsa-miR-6516 NM_175738   | RAB37 | 1 |
| hsa-miR-7845 NM_175738   | RAB37 | 1 |
| hsa-miR-7845 NM_175738   | RAB37 | 1 |
| hsa-miR-7846 NM_175738   | RAB37 | 1 |
| hsa-miR-7851 NM_175738   | RAB37 | 1 |
| hsa-miR-7851 NM_175738   | RAB37 | 1 |
| hsa-miR-7852 NM_175738   | RAB37 | 1 |
| hsa-miR-7974 NM_175738   | RAB37 | 1 |
| hsa-miR-7977 NM_175738   | RAB37 | 1 |
| hsa-miR-806C NM_175738   | RAB37 | 1 |
| hsa-miR-8063 NM_175738   | RAB37 | 1 |
| hsa-miR-8071 NM_175738   | RAB37 | 1 |
| hsa-miR-808C NM_175738   | RAB37 | 1 |
| hsa-miR-8085 NM_175738   | RAB37 | 1 |
| hsa-miR-8086 NM_175738   | RAB37 | 1 |
| hsa-miR-950C NM_175738   | RAB37 | 1 |
| hsa-miR-950C NM_175738   | RAB37 | 1 |
| hsa-miR-9718 NM_175738   | RAB37 | 1 |
| hsa-miR-9898 NM_175738   | RAB37 | 1 |
| hsa-miR-9903 NM_175738   | RAB37 | 1 |
| hsa-miR-9986 NM_175738   | RAB37 | 1 |
| hsa-miR-1022 NM_175738   | RAB37 | 1 |
| hsa-miR-1039 NM_175738   | RAB37 | 1 |
| hsa-miR-1039 NM_175738   | RAB37 | 1 |
| hsa-miR-104C NM_175738   | RAB37 | 1 |
| hsa-miR-1052 NM_175738   | RAB37 | 1 |
| hsa-miR-1118 NM_175738   | RAB37 | 1 |
| hsa-miR-1118 NM_175738   | RAB37 | 1 |
| hsa-miR-3059 NM_175738   | RAB37 | 1 |
| hsa-miR-3059 NM_175738   | RAB37 | 1 |
| hsa-miR-3059 NM_175738   | RAB37 | 1 |
| hsa-miR-9851 NM_175738   | RAB37 | 1 |
| hsa-miR-9851 NM_175738   | RAB37 | 1 |
| hsa-miR-1211 NM_175738   | RAB37 | 1 |
| hsa-miR-1211 NM_175738   | RAB37 | 1 |
| hsa-miR-1212 NM_175738   | RAB37 | 1 |
| hsa-miR-15a- NM_0013304  | RAB37 | 1 |
| hsa-miR-18a- NM_0013304  | RAB37 | 1 |
| hsa-miR-18a- NM_0013304  | RAB37 | 1 |
| hsa-miR-18a- NM_0013304  | RAB37 | 1 |
| hsa-miR-23a- NM_0013304  | RAB37 | 1 |
| hsa-miR-25-5j NM_0013304 | RAB37 | 1 |
| hsa-miR-25-5j NM_0013304 | RAB37 | 1 |
| hsa-miR-27a- NM_0013304  | RAB37 | 1 |
| hsa-miR-27a- NM_0013304  | RAB37 | 1 |
| hsa-miR-28-3j NM_0013304 | RAB37 | 1 |
| hsa-miR-103a NM_0013304  | RAB37 | 1 |
| hsa-miR-103a NM_0013304  | RAB37 | 1 |
| hsa-miR-103a NM_0013304  | RAB37 | 1 |
| hsa-miR-197- NM_0013304  | RAB37 | 1 |
| hsa-miR-197- NM_0013304  | RAB37 | 1 |
| hsa-miR-208a NM_0013304  | RAB37 | 1 |
| hsa-miR-208a NM_0013304  | RAB37 | 1 |
| hsa-miR-182- NM_0013304  | RAB37 | 1 |
| hsa-miR-196a NM_0013304  | RAB37 | 1 |
| hsa-miR-204- NM_0013304  | RAB37 | 1 |
| hsa-miR-212- NM_0013304  | RAB37 | 1 |
| hsa-miR-222- NM_0013304  | RAB37 | 1 |
| hsa-miR-224- NM_0013304  | RAB37 | 1 |
| hsa-miR-200b NM_0013304  | RAB37 | 1 |
| hsa-miR-15b- NM_0013304  | RAB37 | 1 |
| hsa-miR-30b- NM_0013304  | RAB37 | 1 |
| hsa-miR-124- NM_0013304  | RAB37 | 1 |
| hsa-miR-135a NM_0013304  | RAB37 | 1 |
| hsa-miR-137- NM_0013304  | RAB37 | 1 |

|              |            |       |   |
|--------------|------------|-------|---|
| hsa-miR-125a | NM_0013304 | RAB37 | 1 |
| hsa-miR-125b | NM_0013304 | RAB37 | 1 |
| hsa-miR-149- | NM_0013304 | RAB37 | 1 |
| hsa-miR-150- | NM_0013304 | RAB37 | 1 |
| hsa-miR-150- | NM_0013304 | RAB37 | 1 |
| hsa-miR-185- | NM_0013304 | RAB37 | 1 |
| hsa-miR-186- | NM_0013304 | RAB37 | 1 |
| hsa-miR-188- | NM_0013304 | RAB37 | 1 |
| hsa-miR-320a | NM_0013304 | RAB37 | 1 |
| hsa-miR-200c | NM_0013304 | RAB37 | 1 |
| hsa-miR-128- | NM_0013304 | RAB37 | 1 |
| hsa-miR-194- | NM_0013304 | RAB37 | 1 |
| hsa-miR-106b | NM_0013304 | RAB37 | 1 |
| hsa-miR-30c- | NM_0013304 | RAB37 | 1 |
| hsa-miR-299- | NM_0013304 | RAB37 | 1 |
| hsa-miR-296- | NM_0013304 | RAB37 | 1 |
| hsa-miR-361- | NM_0013304 | RAB37 | 1 |
| hsa-miR-361- | NM_0013304 | RAB37 | 1 |
| hsa-miR-361- | NM_0013304 | RAB37 | 1 |
| hsa-miR-302c | NM_0013304 | RAB37 | 1 |
| hsa-miR-367- | NM_0013304 | RAB37 | 1 |
| hsa-miR-376a | NM_0013304 | RAB37 | 1 |
| hsa-miR-323a | NM_0013304 | RAB37 | 1 |
| hsa-miR-135b | NM_0013304 | RAB37 | 1 |
| hsa-miR-331- | NM_0013304 | RAB37 | 1 |
| hsa-miR-331- | NM_0013304 | RAB37 | 1 |
| hsa-miR-346  | NM_0013304 | RAB37 | 1 |
| hsa-miR-422a | NM_0013304 | RAB37 | 1 |
| hsa-miR-423- | NM_0013304 | RAB37 | 1 |
| hsa-miR-425- | NM_0013304 | RAB37 | 1 |
| hsa-miR-18b- | NM_0013304 | RAB37 | 1 |
| hsa-miR-18b- | NM_0013304 | RAB37 | 1 |
| hsa-miR-483- | NM_0013304 | RAB37 | 1 |
| hsa-miR-202- | NM_0013304 | RAB37 | 1 |
| hsa-miR-202- | NM_0013304 | RAB37 | 1 |
| hsa-miR-493- | NM_0013304 | RAB37 | 1 |
| hsa-miR-495- | NM_0013304 | RAB37 | 1 |
| hsa-miR-512- | NM_0013304 | RAB37 | 1 |
| hsa-miR-520e | NM_0013304 | RAB37 | 1 |
| hsa-miR-526b | NM_0013304 | RAB37 | 1 |
| hsa-miR-504- | NM_0013304 | RAB37 | 1 |
| hsa-miR-504- | NM_0013304 | RAB37 | 1 |
| hsa-miR-505- | NM_0013304 | RAB37 | 1 |
| hsa-miR-508- | NM_0013304 | RAB37 | 1 |
| hsa-miR-509- | NM_0013304 | RAB37 | 1 |
| hsa-miR-514a | NM_0013304 | RAB37 | 1 |
| hsa-miR-532- | NM_0013304 | RAB37 | 1 |
| hsa-miR-455- | NM_0013304 | RAB37 | 1 |
| hsa-miR-487b | NM_0013304 | RAB37 | 1 |
| hsa-miR-92b- | NM_0013304 | RAB37 | 1 |
| hsa-miR-572  | NM_0013304 | RAB37 | 1 |
| hsa-miR-575  | NM_0013304 | RAB37 | 1 |
| hsa-miR-584- | NM_0013304 | RAB37 | 1 |
| hsa-miR-584- | NM_0013304 | RAB37 | 1 |
| hsa-miR-585- | NM_0013304 | RAB37 | 1 |
| hsa-miR-550a | NM_0013304 | RAB37 | 1 |
| hsa-miR-596  | NM_0013304 | RAB37 | 1 |
| hsa-miR-608  | NM_0013304 | RAB37 | 1 |
| hsa-miR-610  | NM_0013304 | RAB37 | 1 |
| hsa-miR-611  | NM_0013304 | RAB37 | 1 |
| hsa-miR-614  | NM_0013304 | RAB37 | 1 |
| hsa-miR-616- | NM_0013304 | RAB37 | 1 |
| hsa-miR-622  | NM_0013304 | RAB37 | 1 |
| hsa-miR-630  | NM_0013304 | RAB37 | 1 |
| hsa-miR-635  | NM_0013304 | RAB37 | 1 |
| hsa-miR-637  | NM_0013304 | RAB37 | 1 |
| hsa-miR-640  | NM_0013304 | RAB37 | 1 |
| hsa-miR-642a | NM_0013304 | RAB37 | 1 |
| hsa-miR-642a | NM_0013304 | RAB37 | 1 |
| hsa-miR-646  | NM_0013304 | RAB37 | 1 |
| hsa-miR-648  | NM_0013304 | RAB37 | 1 |
| hsa-miR-652- | NM_0013304 | RAB37 | 1 |
| hsa-miR-656- | NM_0013304 | RAB37 | 1 |
| hsa-miR-656- | NM_0013304 | RAB37 | 1 |
| hsa-miR-658  | NM_0013304 | RAB37 | 1 |
| hsa-miR-320b | NM_0013304 | RAB37 | 1 |
| hsa-miR-320c | NM_0013304 | RAB37 | 1 |
| hsa-miR-1296 | NM_0013304 | RAB37 | 1 |
| hsa-miR-1301 | NM_0013304 | RAB37 | 1 |
| hsa-miR-766- | NM_0013304 | RAB37 | 1 |
| hsa-miR-1185 | NM_0013304 | RAB37 | 1 |
| hsa-miR-1298 | NM_0013304 | RAB37 | 1 |
| hsa-miR-761  | NM_0013304 | RAB37 | 1 |
| hsa-miR-764  | NM_0013304 | RAB37 | 1 |
| hsa-miR-770- | NM_0013304 | RAB37 | 1 |
| hsa-miR-675- | NM_0013304 | RAB37 | 1 |
| hsa-miR-298  | NM_0013304 | RAB37 | 1 |
| hsa-miR-450b | NM_0013304 | RAB37 | 1 |
| hsa-miR-888- | NM_0013304 | RAB37 | 1 |
| hsa-miR-541- | NM_0013304 | RAB37 | 1 |
| hsa-miR-708- | NM_0013304 | RAB37 | 1 |
| hsa-miR-744- | NM_0013304 | RAB37 | 1 |
| hsa-miR-885- | NM_0013304 | RAB37 | 1 |
| hsa-miR-877- | NM_0013304 | RAB37 | 1 |















|              |            |       |   |
|--------------|------------|-------|---|
| hsa-miR-204- | NM_0010066 | RAB37 | 1 |
| hsa-miR-212- | NM_0010066 | RAB37 | 1 |
| hsa-miR-222- | NM_0010066 | RAB37 | 1 |
| hsa-miR-224- | NM_0010066 | RAB37 | 1 |
| hsa-miR-200b | NM_0010066 | RAB37 | 1 |
| hsa-miR-15b- | NM_0010066 | RAB37 | 1 |
| hsa-miR-30b- | NM_0010066 | RAB37 | 1 |
| hsa-miR-124- | NM_0010066 | RAB37 | 1 |
| hsa-miR-128- | NM_0010066 | RAB37 | 1 |
| hsa-miR-135a | NM_0010066 | RAB37 | 1 |
| hsa-miR-125a | NM_0010066 | RAB37 | 1 |
| hsa-miR-125b | NM_0010066 | RAB37 | 1 |
| hsa-miR-150- | NM_0010066 | RAB37 | 1 |
| hsa-miR-150- | NM_0010066 | RAB37 | 1 |
| hsa-miR-185- | NM_0010066 | RAB37 | 1 |
| hsa-miR-186- | NM_0010066 | RAB37 | 1 |
| hsa-miR-188- | NM_0010066 | RAB37 | 1 |
| hsa-miR-320a | NM_0010066 | RAB37 | 1 |
| hsa-miR-200c | NM_0010066 | RAB37 | 1 |
| hsa-miR-194- | NM_0010066 | RAB37 | 1 |
| hsa-miR-106b | NM_0010066 | RAB37 | 1 |
| hsa-miR-30c- | NM_0010066 | RAB37 | 1 |
| hsa-miR-299- | NM_0010066 | RAB37 | 1 |
| hsa-miR-296- | NM_0010066 | RAB37 | 1 |
| hsa-miR-361- | NM_0010066 | RAB37 | 1 |
| hsa-miR-361- | NM_0010066 | RAB37 | 1 |
| hsa-miR-361- | NM_0010066 | RAB37 | 1 |
| hsa-miR-302c | NM_0010066 | RAB37 | 1 |
| hsa-miR-367- | NM_0010066 | RAB37 | 1 |
| hsa-miR-376a | NM_0010066 | RAB37 | 1 |
| hsa-miR-330- | NM_0010066 | RAB37 | 1 |
| hsa-miR-323a | NM_0010066 | RAB37 | 1 |
| hsa-miR-331- | NM_0010066 | RAB37 | 1 |
| hsa-miR-331- | NM_0010066 | RAB37 | 1 |
| hsa-miR-346  | NM_0010066 | RAB37 | 1 |
| hsa-miR-422a | NM_0010066 | RAB37 | 1 |
| hsa-miR-423- | NM_0010066 | RAB37 | 1 |
| hsa-miR-425- | NM_0010066 | RAB37 | 1 |
| hsa-miR-18b- | NM_0010066 | RAB37 | 1 |
| hsa-miR-18b- | NM_0010066 | RAB37 | 1 |
| hsa-miR-483- | NM_0010066 | RAB37 | 1 |
| hsa-miR-202- | NM_0010066 | RAB37 | 1 |
| hsa-miR-202- | NM_0010066 | RAB37 | 1 |
| hsa-miR-493- | NM_0010066 | RAB37 | 1 |
| hsa-miR-495- | NM_0010066 | RAB37 | 1 |
| hsa-miR-512- | NM_0010066 | RAB37 | 1 |
| hsa-miR-498- | NM_0010066 | RAB37 | 1 |
| hsa-miR-498- | NM_0010066 | RAB37 | 1 |
| hsa-miR-520e | NM_0010066 | RAB37 | 1 |
| hsa-miR-526b | NM_0010066 | RAB37 | 1 |
| hsa-miR-504- | NM_0010066 | RAB37 | 1 |
| hsa-miR-505- | NM_0010066 | RAB37 | 1 |
| hsa-miR-508- | NM_0010066 | RAB37 | 1 |
| hsa-miR-509- | NM_0010066 | RAB37 | 1 |
| hsa-miR-514a | NM_0010066 | RAB37 | 1 |
| hsa-miR-532- | NM_0010066 | RAB37 | 1 |
| hsa-miR-455- | NM_0010066 | RAB37 | 1 |
| hsa-miR-487b | NM_0010066 | RAB37 | 1 |
| hsa-miR-92b- | NM_0010066 | RAB37 | 1 |
| hsa-miR-572  | NM_0010066 | RAB37 | 1 |
| hsa-miR-575  | NM_0010066 | RAB37 | 1 |
| hsa-miR-584- | NM_0010066 | RAB37 | 1 |
| hsa-miR-585- | NM_0010066 | RAB37 | 1 |
| hsa-miR-550a | NM_0010066 | RAB37 | 1 |
| hsa-miR-596  | NM_0010066 | RAB37 | 1 |
| hsa-miR-608  | NM_0010066 | RAB37 | 1 |
| hsa-miR-610  | NM_0010066 | RAB37 | 1 |
| hsa-miR-611  | NM_0010066 | RAB37 | 1 |
| hsa-miR-614  | NM_0010066 | RAB37 | 1 |
| hsa-miR-616- | NM_0010066 | RAB37 | 1 |
| hsa-miR-622  | NM_0010066 | RAB37 | 1 |
| hsa-miR-630  | NM_0010066 | RAB37 | 1 |
| hsa-miR-632  | NM_0010066 | RAB37 | 1 |
| hsa-miR-635  | NM_0010066 | RAB37 | 1 |
| hsa-miR-637  | NM_0010066 | RAB37 | 1 |
| hsa-miR-640  | NM_0010066 | RAB37 | 1 |
| hsa-miR-642a | NM_0010066 | RAB37 | 1 |
| hsa-miR-642a | NM_0010066 | RAB37 | 1 |
| hsa-miR-646  | NM_0010066 | RAB37 | 1 |
| hsa-miR-648  | NM_0010066 | RAB37 | 1 |
| hsa-miR-652- | NM_0010066 | RAB37 | 1 |
| hsa-miR-654- | NM_0010066 | RAB37 | 1 |
| hsa-miR-656- | NM_0010066 | RAB37 | 1 |
| hsa-miR-656- | NM_0010066 | RAB37 | 1 |
| hsa-miR-658  | NM_0010066 | RAB37 | 1 |
| hsa-miR-320b | NM_0010066 | RAB37 | 1 |
| hsa-miR-320c | NM_0010066 | RAB37 | 1 |
| hsa-miR-1296 | NM_0010066 | RAB37 | 1 |
| hsa-miR-1301 | NM_0010066 | RAB37 | 1 |
| hsa-miR-766- | NM_0010066 | RAB37 | 1 |
| hsa-miR-1185 | NM_0010066 | RAB37 | 1 |
| hsa-miR-1298 | NM_0010066 | RAB37 | 1 |
| hsa-miR-761  | NM_0010066 | RAB37 | 1 |
| hsa-miR-764  | NM_0010066 | RAB37 | 1 |

|              |            |       |   |
|--------------|------------|-------|---|
| hsa-miR-770- | NM_0010066 | RAB37 | 1 |
| hsa-miR-675- | NM_0010066 | RAB37 | 1 |
| hsa-miR-298  | NM_0010066 | RAB37 | 1 |
| hsa-miR-450t | NM_0010066 | RAB37 | 1 |
| hsa-miR-888- | NM_0010066 | RAB37 | 1 |
| hsa-miR-541- | NM_0010066 | RAB37 | 1 |
| hsa-miR-708- | NM_0010066 | RAB37 | 1 |
| hsa-miR-744- | NM_0010066 | RAB37 | 1 |
| hsa-miR-885- | NM_0010066 | RAB37 | 1 |
| hsa-miR-877- | NM_0010066 | RAB37 | 1 |
| hsa-miR-374t | NM_0010066 | RAB37 | 1 |
| hsa-miR-760  | NM_0010066 | RAB37 | 1 |
| hsa-miR-920  | NM_0010066 | RAB37 | 1 |
| hsa-miR-920  | NM_0010066 | RAB37 | 1 |
| hsa-miR-920  | NM_0010066 | RAB37 | 1 |
| hsa-miR-937- | NM_0010066 | RAB37 | 1 |
| hsa-miR-939- | NM_0010066 | RAB37 | 1 |
| hsa-miR-942- | NM_0010066 | RAB37 | 1 |
| hsa-miR-1178 | NM_0010066 | RAB37 | 1 |
| hsa-miR-1182 | NM_0010066 | RAB37 | 1 |
| hsa-miR-1225 | NM_0010066 | RAB37 | 1 |
| hsa-miR-1225 | NM_0010066 | RAB37 | 1 |
| hsa-miR-1227 | NM_0010066 | RAB37 | 1 |
| hsa-miR-1228 | NM_0010066 | RAB37 | 1 |
| hsa-miR-1233 | NM_0010066 | RAB37 | 1 |
| hsa-miR-1236 | NM_0010066 | RAB37 | 1 |
| hsa-miR-1237 | NM_0010066 | RAB37 | 1 |
| hsa-miR-1237 | NM_0010066 | RAB37 | 1 |
| hsa-miR-1238 | NM_0010066 | RAB37 | 1 |
| hsa-miR-1238 | NM_0010066 | RAB37 | 1 |
| hsa-miR-1238 | NM_0010066 | RAB37 | 1 |
| hsa-miR-1238 | NM_0010066 | RAB37 | 1 |
| hsa-miR-1202 | NM_0010066 | RAB37 | 1 |
| hsa-miR-1202 | NM_0010066 | RAB37 | 1 |
| hsa-miR-1203 | NM_0010066 | RAB37 | 1 |
| hsa-miR-1207 | NM_0010066 | RAB37 | 1 |
| hsa-miR-1207 | NM_0010066 | RAB37 | 1 |
| hsa-miR-1285 | NM_0010066 | RAB37 | 1 |
| hsa-miR-1287 | NM_0010066 | RAB37 | 1 |
| hsa-miR-1293 | NM_0010066 | RAB37 | 1 |
| hsa-miR-1299 | NM_0010066 | RAB37 | 1 |
| hsa-miR-1304 | NM_0010066 | RAB37 | 1 |
| hsa-miR-1249 | NM_0010066 | RAB37 | 1 |
| hsa-miR-1256 | NM_0010066 | RAB37 | 1 |
| hsa-miR-1260 | NM_0010066 | RAB37 | 1 |
| hsa-miR-1266 | NM_0010066 | RAB37 | 1 |
| hsa-miR-1267 | NM_0010066 | RAB37 | 1 |
| hsa-miR-1270 | NM_0010066 | RAB37 | 1 |
| hsa-miR-1270 | NM_0010066 | RAB37 | 1 |
| hsa-miR-1471 | NM_0010066 | RAB37 | 1 |
| hsa-miR-1471 | NM_0010066 | RAB37 | 1 |
| hsa-miR-1825 | NM_0010066 | RAB37 | 1 |
| hsa-miR-1908 | NM_0010066 | RAB37 | 1 |
| hsa-miR-1909 | NM_0010066 | RAB37 | 1 |
| hsa-miR-1909 | NM_0010066 | RAB37 | 1 |
| hsa-miR-1912 | NM_0010066 | RAB37 | 1 |
| hsa-miR-1913 | NM_0010066 | RAB37 | 1 |
| hsa-miR-1913 | NM_0010066 | RAB37 | 1 |
| hsa-miR-1972 | NM_0010066 | RAB37 | 1 |
| hsa-miR-2116 | NM_0010066 | RAB37 | 1 |
| hsa-miR-2276 | NM_0010066 | RAB37 | 1 |
| hsa-miR-711  | NM_0010066 | RAB37 | 1 |
| hsa-miR-3119 | NM_0010066 | RAB37 | 1 |
| hsa-miR-3124 | NM_0010066 | RAB37 | 1 |
| hsa-miR-3126 | NM_0010066 | RAB37 | 1 |
| hsa-miR-3127 | NM_0010066 | RAB37 | 1 |
| hsa-miR-3127 | NM_0010066 | RAB37 | 1 |
| hsa-miR-3130 | NM_0010066 | RAB37 | 1 |
| hsa-miR-544t | NM_0010066 | RAB37 | 1 |
| hsa-miR-3141 | NM_0010066 | RAB37 | 1 |
| hsa-miR-3142 | NM_0010066 | RAB37 | 1 |
| hsa-miR-1273 | NM_0010066 | RAB37 | 1 |
| hsa-miR-1273 | NM_0010066 | RAB37 | 1 |
| hsa-miR-3152 | NM_0010066 | RAB37 | 1 |
| hsa-miR-3153 | NM_0010066 | RAB37 | 1 |
| hsa-miR-3074 | NM_0010066 | RAB37 | 1 |
| hsa-miR-3154 | NM_0010066 | RAB37 | 1 |
| hsa-miR-3155 | NM_0010066 | RAB37 | 1 |
| hsa-miR-3156 | NM_0010066 | RAB37 | 1 |
| hsa-miR-3156 | NM_0010066 | RAB37 | 1 |
| hsa-miR-3157 | NM_0010066 | RAB37 | 1 |
| hsa-miR-3158 | NM_0010066 | RAB37 | 1 |
| hsa-miR-3160 | NM_0010066 | RAB37 | 1 |
| hsa-miR-3161 | NM_0010066 | RAB37 | 1 |
| hsa-miR-3162 | NM_0010066 | RAB37 | 1 |
| hsa-miR-3162 | NM_0010066 | RAB37 | 1 |
| hsa-miR-3173 | NM_0010066 | RAB37 | 1 |
| hsa-miR-3173 | NM_0010066 | RAB37 | 1 |
| hsa-miR-323t | NM_0010066 | RAB37 | 1 |
| hsa-miR-3174 | NM_0010066 | RAB37 | 1 |
| hsa-miR-3176 | NM_0010066 | RAB37 | 1 |
| hsa-miR-3180 | NM_0010066 | RAB37 | 1 |
| hsa-miR-3187 | NM_0010066 | RAB37 | 1 |
| hsa-miR-3188 | NM_0010066 | RAB37 | 1 |











|                                |   |
|--------------------------------|---|
| hsa-miR-6888 NM_0010066 RAB37  | 1 |
| hsa-miR-6889 NM_0010066 RAB37  | 1 |
| hsa-miR-6890 NM_0010066 RAB37  | 1 |
| hsa-miR-6891 NM_0010066 RAB37  | 1 |
| hsa-miR-6892 NM_0010066 RAB37  | 1 |
| hsa-miR-6893 NM_0010066 RAB37  | 1 |
| hsa-miR-6894 NM_0010066 RAB37  | 1 |
| hsa-miR-6895 NM_0010066 RAB37  | 1 |
| hsa-miR-7107 NM_0010066 RAB37  | 1 |
| hsa-miR-7108 NM_0010066 RAB37  | 1 |
| hsa-miR-7109 NM_0010066 RAB37  | 1 |
| hsa-miR-7110 NM_0010066 RAB37  | 1 |
| hsa-miR-7111 NM_0010066 RAB37  | 1 |
| hsa-miR-7112 NM_0010066 RAB37  | 1 |
| hsa-miR-7113 NM_0010066 RAB37  | 1 |
| hsa-miR-7114 NM_0010066 RAB37  | 1 |
| hsa-miR-7115 NM_0010066 RAB37  | 1 |
| hsa-miR-7151 NM_0010066 RAB37  | 1 |
| hsa-miR-7152 NM_0010066 RAB37  | 1 |
| hsa-miR-7154 NM_0010066 RAB37  | 1 |
| hsa-miR-7156 NM_0010066 RAB37  | 1 |
| hsa-miR-7160 NM_0010066 RAB37  | 1 |
| hsa-miR-7703 NM_0010066 RAB37  | 1 |
| hsa-miR-7843 NM_0010066 RAB37  | 1 |
| hsa-miR-4433 NM_0010066 RAB37  | 1 |
| hsa-miR-6516 NM_0010066 RAB37  | 1 |
| hsa-miR-7845 NM_0010066 RAB37  | 1 |
| hsa-miR-7851 NM_0010066 RAB37  | 1 |
| hsa-miR-7851 NM_0010066 RAB37  | 1 |
| hsa-miR-7852 NM_0010066 RAB37  | 1 |
| hsa-miR-7974 NM_0010066 RAB37  | 1 |
| hsa-miR-7977 NM_0010066 RAB37  | 1 |
| hsa-miR-8060 NM_0010066 RAB37  | 1 |
| hsa-miR-8063 NM_0010066 RAB37  | 1 |
| hsa-miR-8071 NM_0010066 RAB37  | 1 |
| hsa-miR-8072 NM_0010066 RAB37  | 1 |
| hsa-miR-8078 NM_0010066 RAB37  | 1 |
| hsa-miR-8080 NM_0010066 RAB37  | 1 |
| hsa-miR-8085 NM_0010066 RAB37  | 1 |
| hsa-miR-8086 NM_0010066 RAB37  | 1 |
| hsa-miR-9500 NM_0010066 RAB37  | 1 |
| hsa-miR-9500 NM_0010066 RAB37  | 1 |
| hsa-miR-9718 NM_0010066 RAB37  | 1 |
| hsa-miR-9898 NM_0010066 RAB37  | 1 |
| hsa-miR-9903 NM_0010066 RAB37  | 1 |
| hsa-miR-1843 NM_0010066 RAB37  | 1 |
| hsa-miR-9986 NM_0010066 RAB37  | 1 |
| hsa-miR-1022 NM_0010066 RAB37  | 1 |
| hsa-miR-1039 NM_0010066 RAB37  | 1 |
| hsa-miR-1039 NM_0010066 RAB37  | 1 |
| hsa-miR-1040 NM_0010066 RAB37  | 1 |
| hsa-miR-1040 NM_0010066 RAB37  | 1 |
| hsa-miR-1052 NM_0010066 RAB37  | 1 |
| hsa-miR-1118 NM_0010066 RAB37  | 1 |
| hsa-miR-1118 NM_0010066 RAB37  | 1 |
| hsa-miR-1140 NM_0010066 RAB37  | 1 |
| hsa-miR-3059 NM_0010066 RAB37  | 1 |
| hsa-miR-3059 NM_0010066 RAB37  | 1 |
| hsa-miR-3059 NM_0010066 RAB37  | 1 |
| hsa-miR-9851 NM_0010066 RAB37  | 1 |
| hsa-miR-9851 NM_0010066 RAB37  | 1 |
| hsa-miR-1211 NM_0010066 RAB37  | 1 |
| hsa-miR-1211 NM_0010066 RAB37  | 1 |
| hsa-miR-1212 NM_0010066 RAB37  | 1 |
| hsa-miR-15a- NM_0011639 RAB37  | 1 |
| hsa-miR-18a- NM_0011639 RAB37  | 1 |
| hsa-miR-18a- NM_0011639 RAB37  | 1 |
| hsa-miR-18a- NM_0011639 RAB37  | 1 |
| hsa-miR-23a- NM_0011639 RAB37  | 1 |
| hsa-miR-25-5j NM_0011639 RAB37 | 1 |
| hsa-miR-27a- NM_0011639 RAB37  | 1 |
| hsa-miR-27a- NM_0011639 RAB37  | 1 |
| hsa-miR-27a- NM_0011639 RAB37  | 1 |
| hsa-miR-28-3j NM_0011639 RAB37 | 1 |
| hsa-miR-92a- NM_0011639 RAB37  | 1 |
| hsa-miR-103a NM_0011639 RAB37  | 1 |
| hsa-miR-103a NM_0011639 RAB37  | 1 |
| hsa-miR-103a NM_0011639 RAB37  | 1 |
| hsa-miR-197- NM_0011639 RAB37  | 1 |
| hsa-miR-197- NM_0011639 RAB37  | 1 |
| hsa-miR-208a NM_0011639 RAB37  | 1 |
| hsa-miR-182- NM_0011639 RAB37  | 1 |
| hsa-miR-196a NM_0011639 RAB37  | 1 |
| hsa-miR-204- NM_0011639 RAB37  | 1 |
| hsa-miR-212- NM_0011639 RAB37  | 1 |
| hsa-miR-222- NM_0011639 RAB37  | 1 |
| hsa-miR-224- NM_0011639 RAB37  | 1 |
| hsa-miR-200b NM_0011639 RAB37  | 1 |
| hsa-miR-15b- NM_0011639 RAB37  | 1 |
| hsa-miR-30b- NM_0011639 RAB37  | 1 |
| hsa-miR-135a NM_0011639 RAB37  | 1 |

|              |            |       |   |
|--------------|------------|-------|---|
| hsa-miR-125a | NM_0011639 | RAB37 | 1 |
| hsa-miR-125b | NM_0011639 | RAB37 | 1 |
| hsa-miR-149- | NM_0011639 | RAB37 | 1 |
| hsa-miR-150- | NM_0011639 | RAB37 | 1 |
| hsa-miR-150- | NM_0011639 | RAB37 | 1 |
| hsa-miR-184  | NM_0011639 | RAB37 | 1 |
| hsa-miR-185- | NM_0011639 | RAB37 | 1 |
| hsa-miR-186- | NM_0011639 | RAB37 | 1 |
| hsa-miR-188- | NM_0011639 | RAB37 | 1 |
| hsa-miR-320a | NM_0011639 | RAB37 | 1 |
| hsa-miR-200c | NM_0011639 | RAB37 | 1 |
| hsa-miR-128- | NM_0011639 | RAB37 | 1 |
| hsa-miR-194- | NM_0011639 | RAB37 | 1 |
| hsa-miR-106b | NM_0011639 | RAB37 | 1 |
| hsa-miR-30c- | NM_0011639 | RAB37 | 1 |
| hsa-miR-299- | NM_0011639 | RAB37 | 1 |
| hsa-miR-296- | NM_0011639 | RAB37 | 1 |
| hsa-miR-361- | NM_0011639 | RAB37 | 1 |
| hsa-miR-361- | NM_0011639 | RAB37 | 1 |
| hsa-miR-361- | NM_0011639 | RAB37 | 1 |
| hsa-miR-302c | NM_0011639 | RAB37 | 1 |
| hsa-miR-367- | NM_0011639 | RAB37 | 1 |
| hsa-miR-376a | NM_0011639 | RAB37 | 1 |
| hsa-miR-135b | NM_0011639 | RAB37 | 1 |
| hsa-miR-331- | NM_0011639 | RAB37 | 1 |
| hsa-miR-346  | NM_0011639 | RAB37 | 1 |
| hsa-miR-422a | NM_0011639 | RAB37 | 1 |
| hsa-miR-423- | NM_0011639 | RAB37 | 1 |
| hsa-miR-425- | NM_0011639 | RAB37 | 1 |
| hsa-miR-18b- | NM_0011639 | RAB37 | 1 |
| hsa-miR-18b- | NM_0011639 | RAB37 | 1 |
| hsa-miR-483- | NM_0011639 | RAB37 | 1 |
| hsa-miR-202- | NM_0011639 | RAB37 | 1 |
| hsa-miR-202- | NM_0011639 | RAB37 | 1 |
| hsa-miR-493- | NM_0011639 | RAB37 | 1 |
| hsa-miR-493- | NM_0011639 | RAB37 | 1 |
| hsa-miR-495- | NM_0011639 | RAB37 | 1 |
| hsa-miR-512- | NM_0011639 | RAB37 | 1 |
| hsa-miR-498- | NM_0011639 | RAB37 | 1 |
| hsa-miR-498- | NM_0011639 | RAB37 | 1 |
| hsa-miR-520e | NM_0011639 | RAB37 | 1 |
| hsa-miR-504- | NM_0011639 | RAB37 | 1 |
| hsa-miR-505- | NM_0011639 | RAB37 | 1 |
| hsa-miR-508- | NM_0011639 | RAB37 | 1 |
| hsa-miR-509- | NM_0011639 | RAB37 | 1 |
| hsa-miR-514a | NM_0011639 | RAB37 | 1 |
| hsa-miR-487b | NM_0011639 | RAB37 | 1 |
| hsa-miR-92b- | NM_0011639 | RAB37 | 1 |
| hsa-miR-572  | NM_0011639 | RAB37 | 1 |
| hsa-miR-575  | NM_0011639 | RAB37 | 1 |
| hsa-miR-584- | NM_0011639 | RAB37 | 1 |
| hsa-miR-585- | NM_0011639 | RAB37 | 1 |
| hsa-miR-550a | NM_0011639 | RAB37 | 1 |
| hsa-miR-610  | NM_0011639 | RAB37 | 1 |
| hsa-miR-611  | NM_0011639 | RAB37 | 1 |
| hsa-miR-614  | NM_0011639 | RAB37 | 1 |
| hsa-miR-616- | NM_0011639 | RAB37 | 1 |
| hsa-miR-622  | NM_0011639 | RAB37 | 1 |
| hsa-miR-630  | NM_0011639 | RAB37 | 1 |
| hsa-miR-635  | NM_0011639 | RAB37 | 1 |
| hsa-miR-640  | NM_0011639 | RAB37 | 1 |
| hsa-miR-642a | NM_0011639 | RAB37 | 1 |
| hsa-miR-642a | NM_0011639 | RAB37 | 1 |
| hsa-miR-648  | NM_0011639 | RAB37 | 1 |
| hsa-miR-652- | NM_0011639 | RAB37 | 1 |
| hsa-miR-656- | NM_0011639 | RAB37 | 1 |
| hsa-miR-656- | NM_0011639 | RAB37 | 1 |
| hsa-miR-658  | NM_0011639 | RAB37 | 1 |
| hsa-miR-320b | NM_0011639 | RAB37 | 1 |
| hsa-miR-320c | NM_0011639 | RAB37 | 1 |
| hsa-miR-1296 | NM_0011639 | RAB37 | 1 |
| hsa-miR-1301 | NM_0011639 | RAB37 | 1 |
| hsa-miR-766- | NM_0011639 | RAB37 | 1 |
| hsa-miR-1185 | NM_0011639 | RAB37 | 1 |
| hsa-miR-1298 | NM_0011639 | RAB37 | 1 |
| hsa-miR-761  | NM_0011639 | RAB37 | 1 |
| hsa-miR-764  | NM_0011639 | RAB37 | 1 |
| hsa-miR-770- | NM_0011639 | RAB37 | 1 |
| hsa-miR-675- | NM_0011639 | RAB37 | 1 |
| hsa-miR-298  | NM_0011639 | RAB37 | 1 |
| hsa-miR-450b | NM_0011639 | RAB37 | 1 |
| hsa-miR-888- | NM_0011639 | RAB37 | 1 |
| hsa-miR-541- | NM_0011639 | RAB37 | 1 |
| hsa-miR-708- | NM_0011639 | RAB37 | 1 |
| hsa-miR-885- | NM_0011639 | RAB37 | 1 |
| hsa-miR-877- | NM_0011639 | RAB37 | 1 |
| hsa-miR-374b | NM_0011639 | RAB37 | 1 |
| hsa-miR-937- | NM_0011639 | RAB37 | 1 |
| hsa-miR-942- | NM_0011639 | RAB37 | 1 |
| hsa-miR-1178 | NM_0011639 | RAB37 | 1 |
| hsa-miR-1182 | NM_0011639 | RAB37 | 1 |
| hsa-miR-1225 | NM_0011639 | RAB37 | 1 |
| hsa-miR-1227 | NM_0011639 | RAB37 | 1 |
| hsa-miR-1228 | NM_0011639 | RAB37 | 1 |













|                               |   |
|-------------------------------|---|
| hsa-miR-103a NM_0011639 RAB37 | 1 |
| hsa-miR-103a NM_0011639 RAB37 | 1 |
| hsa-miR-103a NM_0011639 RAB37 | 1 |
| hsa-miR-197- NM_0011639 RAB37 | 1 |
| hsa-miR-197- NM_0011639 RAB37 | 1 |
| hsa-miR-208a NM_0011639 RAB37 | 1 |
| hsa-miR-208a NM_0011639 RAB37 | 1 |
| hsa-miR-182- NM_0011639 RAB37 | 1 |
| hsa-miR-196a NM_0011639 RAB37 | 1 |
| hsa-miR-204- NM_0011639 RAB37 | 1 |
| hsa-miR-212- NM_0011639 RAB37 | 1 |
| hsa-miR-219a NM_0011639 RAB37 | 1 |
| hsa-miR-222- NM_0011639 RAB37 | 1 |
| hsa-miR-224- NM_0011639 RAB37 | 1 |
| hsa-miR-200t NM_0011639 RAB37 | 1 |
| hsa-miR-15b- NM_0011639 RAB37 | 1 |
| hsa-miR-30b- NM_0011639 RAB37 | 1 |
| hsa-miR-124- NM_0011639 RAB37 | 1 |
| hsa-miR-128- NM_0011639 RAB37 | 1 |
| hsa-miR-135a NM_0011639 RAB37 | 1 |
| hsa-miR-125a NM_0011639 RAB37 | 1 |
| hsa-miR-125t NM_0011639 RAB37 | 1 |
| hsa-miR-150- NM_0011639 RAB37 | 1 |
| hsa-miR-150- NM_0011639 RAB37 | 1 |
| hsa-miR-185- NM_0011639 RAB37 | 1 |
| hsa-miR-186- NM_0011639 RAB37 | 1 |
| hsa-miR-188- NM_0011639 RAB37 | 1 |
| hsa-miR-320a NM_0011639 RAB37 | 1 |
| hsa-miR-200c NM_0011639 RAB37 | 1 |
| hsa-miR-194- NM_0011639 RAB37 | 1 |
| hsa-miR-106t NM_0011639 RAB37 | 1 |
| hsa-miR-30c- NM_0011639 RAB37 | 1 |
| hsa-miR-299- NM_0011639 RAB37 | 1 |
| hsa-miR-296- NM_0011639 RAB37 | 1 |
| hsa-miR-361- NM_0011639 RAB37 | 1 |
| hsa-miR-361- NM_0011639 RAB37 | 1 |
| hsa-miR-361- NM_0011639 RAB37 | 1 |
| hsa-miR-302c NM_0011639 RAB37 | 1 |
| hsa-miR-367- NM_0011639 RAB37 | 1 |
| hsa-miR-376a NM_0011639 RAB37 | 1 |
| hsa-miR-330- NM_0011639 RAB37 | 1 |
| hsa-miR-323a NM_0011639 RAB37 | 1 |
| hsa-miR-331- NM_0011639 RAB37 | 1 |
| hsa-miR-331- NM_0011639 RAB37 | 1 |
| hsa-miR-346 NM_0011639 RAB37  | 1 |
| hsa-miR-422a NM_0011639 RAB37 | 1 |
| hsa-miR-423- NM_0011639 RAB37 | 1 |
| hsa-miR-425- NM_0011639 RAB37 | 1 |
| hsa-miR-18b- NM_0011639 RAB37 | 1 |
| hsa-miR-18b- NM_0011639 RAB37 | 1 |
| hsa-miR-483- NM_0011639 RAB37 | 1 |
| hsa-miR-202- NM_0011639 RAB37 | 1 |
| hsa-miR-202- NM_0011639 RAB37 | 1 |
| hsa-miR-493- NM_0011639 RAB37 | 1 |
| hsa-miR-495- NM_0011639 RAB37 | 1 |
| hsa-miR-512- NM_0011639 RAB37 | 1 |
| hsa-miR-498- NM_0011639 RAB37 | 1 |
| hsa-miR-498- NM_0011639 RAB37 | 1 |
| hsa-miR-520e NM_0011639 RAB37 | 1 |
| hsa-miR-526t NM_0011639 RAB37 | 1 |
| hsa-miR-504- NM_0011639 RAB37 | 1 |
| hsa-miR-505- NM_0011639 RAB37 | 1 |
| hsa-miR-508- NM_0011639 RAB37 | 1 |
| hsa-miR-509- NM_0011639 RAB37 | 1 |
| hsa-miR-514a NM_0011639 RAB37 | 1 |
| hsa-miR-532- NM_0011639 RAB37 | 1 |
| hsa-miR-455- NM_0011639 RAB37 | 1 |
| hsa-miR-487t NM_0011639 RAB37 | 1 |
| hsa-miR-92b- NM_0011639 RAB37 | 1 |
| hsa-miR-572 NM_0011639 RAB37  | 1 |
| hsa-miR-575 NM_0011639 RAB37  | 1 |
| hsa-miR-584- NM_0011639 RAB37 | 1 |
| hsa-miR-585- NM_0011639 RAB37 | 1 |
| hsa-miR-550a NM_0011639 RAB37 | 1 |
| hsa-miR-596 NM_0011639 RAB37  | 1 |
| hsa-miR-608 NM_0011639 RAB37  | 1 |
| hsa-miR-610 NM_0011639 RAB37  | 1 |
| hsa-miR-611 NM_0011639 RAB37  | 1 |
| hsa-miR-614 NM_0011639 RAB37  | 1 |
| hsa-miR-615- NM_0011639 RAB37 | 1 |
| hsa-miR-616- NM_0011639 RAB37 | 1 |
| hsa-miR-622 NM_0011639 RAB37  | 1 |
| hsa-miR-630 NM_0011639 RAB37  | 1 |
| hsa-miR-632 NM_0011639 RAB37  | 1 |
| hsa-miR-635 NM_0011639 RAB37  | 1 |
| hsa-miR-637 NM_0011639 RAB37  | 1 |
| hsa-miR-640 NM_0011639 RAB37  | 1 |
| hsa-miR-642a NM_0011639 RAB37 | 1 |
| hsa-miR-642a NM_0011639 RAB37 | 1 |
| hsa-miR-646 NM_0011639 RAB37  | 1 |
| hsa-miR-648 NM_0011639 RAB37  | 1 |
| hsa-miR-652- NM_0011639 RAB37 | 1 |
| hsa-miR-654- NM_0011639 RAB37 | 1 |
| hsa-miR-656- NM_0011639 RAB37 | 1 |

|              |            |       |   |
|--------------|------------|-------|---|
| hsa-miR-656- | NM_0011639 | RAB37 | 1 |
| hsa-miR-658  | NM_0011639 | RAB37 | 1 |
| hsa-miR-320t | NM_0011639 | RAB37 | 1 |
| hsa-miR-320c | NM_0011639 | RAB37 | 1 |
| hsa-miR-1296 | NM_0011639 | RAB37 | 1 |
| hsa-miR-1301 | NM_0011639 | RAB37 | 1 |
| hsa-miR-766- | NM_0011639 | RAB37 | 1 |
| hsa-miR-1185 | NM_0011639 | RAB37 | 1 |
| hsa-miR-1298 | NM_0011639 | RAB37 | 1 |
| hsa-miR-761  | NM_0011639 | RAB37 | 1 |
| hsa-miR-764  | NM_0011639 | RAB37 | 1 |
| hsa-miR-770- | NM_0011639 | RAB37 | 1 |
| hsa-miR-675- | NM_0011639 | RAB37 | 1 |
| hsa-miR-298  | NM_0011639 | RAB37 | 1 |
| hsa-miR-450t | NM_0011639 | RAB37 | 1 |
| hsa-miR-888- | NM_0011639 | RAB37 | 1 |
| hsa-miR-541- | NM_0011639 | RAB37 | 1 |
| hsa-miR-708- | NM_0011639 | RAB37 | 1 |
| hsa-miR-744- | NM_0011639 | RAB37 | 1 |
| hsa-miR-885- | NM_0011639 | RAB37 | 1 |
| hsa-miR-877- | NM_0011639 | RAB37 | 1 |
| hsa-miR-374t | NM_0011639 | RAB37 | 1 |
| hsa-miR-760  | NM_0011639 | RAB37 | 1 |
| hsa-miR-920  | NM_0011639 | RAB37 | 1 |
| hsa-miR-920  | NM_0011639 | RAB37 | 1 |
| hsa-miR-920  | NM_0011639 | RAB37 | 1 |
| hsa-miR-937- | NM_0011639 | RAB37 | 1 |
| hsa-miR-939- | NM_0011639 | RAB37 | 1 |
| hsa-miR-942- | NM_0011639 | RAB37 | 1 |
| hsa-miR-1178 | NM_0011639 | RAB37 | 1 |
| hsa-miR-1182 | NM_0011639 | RAB37 | 1 |
| hsa-miR-1225 | NM_0011639 | RAB37 | 1 |
| hsa-miR-1225 | NM_0011639 | RAB37 | 1 |
| hsa-miR-1227 | NM_0011639 | RAB37 | 1 |
| hsa-miR-1228 | NM_0011639 | RAB37 | 1 |
| hsa-miR-1233 | NM_0011639 | RAB37 | 1 |
| hsa-miR-1236 | NM_0011639 | RAB37 | 1 |
| hsa-miR-1237 | NM_0011639 | RAB37 | 1 |
| hsa-miR-1237 | NM_0011639 | RAB37 | 1 |
| hsa-miR-1238 | NM_0011639 | RAB37 | 1 |
| hsa-miR-1238 | NM_0011639 | RAB37 | 1 |
| hsa-miR-1238 | NM_0011639 | RAB37 | 1 |
| hsa-miR-1238 | NM_0011639 | RAB37 | 1 |
| hsa-miR-1202 | NM_0011639 | RAB37 | 1 |
| hsa-miR-1202 | NM_0011639 | RAB37 | 1 |
| hsa-miR-1203 | NM_0011639 | RAB37 | 1 |
| hsa-miR-1207 | NM_0011639 | RAB37 | 1 |
| hsa-miR-1207 | NM_0011639 | RAB37 | 1 |
| hsa-miR-1285 | NM_0011639 | RAB37 | 1 |
| hsa-miR-1287 | NM_0011639 | RAB37 | 1 |
| hsa-miR-1293 | NM_0011639 | RAB37 | 1 |
| hsa-miR-1299 | NM_0011639 | RAB37 | 1 |
| hsa-miR-1304 | NM_0011639 | RAB37 | 1 |
| hsa-miR-1249 | NM_0011639 | RAB37 | 1 |
| hsa-miR-1256 | NM_0011639 | RAB37 | 1 |
| hsa-miR-126C | NM_0011639 | RAB37 | 1 |
| hsa-miR-1266 | NM_0011639 | RAB37 | 1 |
| hsa-miR-1267 | NM_0011639 | RAB37 | 1 |
| hsa-miR-127C | NM_0011639 | RAB37 | 1 |
| hsa-miR-127C | NM_0011639 | RAB37 | 1 |
| hsa-miR-1471 | NM_0011639 | RAB37 | 1 |
| hsa-miR-1471 | NM_0011639 | RAB37 | 1 |
| hsa-miR-1825 | NM_0011639 | RAB37 | 1 |
| hsa-miR-1908 | NM_0011639 | RAB37 | 1 |
| hsa-miR-1909 | NM_0011639 | RAB37 | 1 |
| hsa-miR-1909 | NM_0011639 | RAB37 | 1 |
| hsa-miR-1912 | NM_0011639 | RAB37 | 1 |
| hsa-miR-1913 | NM_0011639 | RAB37 | 1 |
| hsa-miR-1913 | NM_0011639 | RAB37 | 1 |
| hsa-miR-1915 | NM_0011639 | RAB37 | 1 |
| hsa-miR-1972 | NM_0011639 | RAB37 | 1 |
| hsa-miR-2116 | NM_0011639 | RAB37 | 1 |
| hsa-miR-2276 | NM_0011639 | RAB37 | 1 |
| hsa-miR-711  | NM_0011639 | RAB37 | 1 |
| hsa-miR-3119 | NM_0011639 | RAB37 | 1 |
| hsa-miR-3124 | NM_0011639 | RAB37 | 1 |
| hsa-miR-3126 | NM_0011639 | RAB37 | 1 |
| hsa-miR-3127 | NM_0011639 | RAB37 | 1 |
| hsa-miR-3127 | NM_0011639 | RAB37 | 1 |
| hsa-miR-313C | NM_0011639 | RAB37 | 1 |
| hsa-miR-544t | NM_0011639 | RAB37 | 1 |
| hsa-miR-3141 | NM_0011639 | RAB37 | 1 |
| hsa-miR-3142 | NM_0011639 | RAB37 | 1 |
| hsa-miR-1273 | NM_0011639 | RAB37 | 1 |
| hsa-miR-1273 | NM_0011639 | RAB37 | 1 |
| hsa-miR-3152 | NM_0011639 | RAB37 | 1 |
| hsa-miR-3153 | NM_0011639 | RAB37 | 1 |
| hsa-miR-3074 | NM_0011639 | RAB37 | 1 |
| hsa-miR-3154 | NM_0011639 | RAB37 | 1 |
| hsa-miR-3155 | NM_0011639 | RAB37 | 1 |
| hsa-miR-3156 | NM_0011639 | RAB37 | 1 |
| hsa-miR-3156 | NM_0011639 | RAB37 | 1 |
| hsa-miR-3157 | NM_0011639 | RAB37 | 1 |
| hsa-miR-3158 | NM_0011639 | RAB37 | 1 |











|                               |            |
|-------------------------------|------------|
| hsa-miR-6879 NM_0011639 RAB37 | 1          |
| hsa-miR-6879 NM_0011639 RAB37 | 1          |
| hsa-miR-6879 NM_0011639 RAB37 | 1          |
| hsa-miR-6880 NM_0011639 RAB37 | 1          |
| hsa-miR-6880 NM_0011639 RAB37 | 1          |
| hsa-miR-6880 NM_0011639 RAB37 | 1          |
| hsa-miR-6881 NM_0011639 RAB37 | 1          |
| hsa-miR-6881 NM_0011639 RAB37 | 1          |
| hsa-miR-6883 NM_0011639 RAB37 | 1          |
| hsa-miR-6883 NM_0011639 RAB37 | 1          |
| hsa-miR-6885 NM_0011639 RAB37 | 1          |
| hsa-miR-6886 NM_0011639 RAB37 | 1          |
| hsa-miR-6886 NM_0011639 RAB37 | 1          |
| hsa-miR-6887 NM_0011639 RAB37 | 1          |
| hsa-miR-6887 NM_0011639 RAB37 | 1          |
| hsa-miR-6888 NM_0011639 RAB37 | 1          |
| hsa-miR-6889 NM_0011639 RAB37 | 1          |
| hsa-miR-6890 NM_0011639 RAB37 | 1          |
| hsa-miR-6891 NM_0011639 RAB37 | 1          |
| hsa-miR-6891 NM_0011639 RAB37 | 1          |
| hsa-miR-6893 NM_0011639 RAB37 | 1          |
| hsa-miR-6893 NM_0011639 RAB37 | 1          |
| hsa-miR-6894 NM_0011639 RAB37 | 1          |
| hsa-miR-6894 NM_0011639 RAB37 | 1          |
| hsa-miR-6895 NM_0011639 RAB37 | 1          |
| hsa-miR-7107 NM_0011639 RAB37 | 1          |
| hsa-miR-7109 NM_0011639 RAB37 | 1          |
| hsa-miR-7111 NM_0011639 RAB37 | 1          |
| hsa-miR-7113 NM_0011639 RAB37 | 1          |
| hsa-miR-7114 NM_0011639 RAB37 | 1          |
| hsa-miR-7114 NM_0011639 RAB37 | 1          |
| hsa-miR-7151 NM_0011639 RAB37 | 1          |
| hsa-miR-7151 NM_0011639 RAB37 | 1          |
| hsa-miR-7152 NM_0011639 RAB37 | 1          |
| hsa-miR-7154 NM_0011639 RAB37 | 1          |
| hsa-miR-7156 NM_0011639 RAB37 | 1          |
| hsa-miR-7160 NM_0011639 RAB37 | 1          |
| hsa-miR-7703 NM_0011639 RAB37 | 1          |
| hsa-miR-7843 NM_0011639 RAB37 | 1          |
| hsa-miR-4433 NM_0011639 RAB37 | 1          |
| hsa-miR-6516 NM_0011639 RAB37 | 1          |
| hsa-miR-7845 NM_0011639 RAB37 | 1          |
| hsa-miR-7845 NM_0011639 RAB37 | 1          |
| hsa-miR-7851 NM_0011639 RAB37 | 1          |
| hsa-miR-7851 NM_0011639 RAB37 | 1          |
| hsa-miR-7852 NM_0011639 RAB37 | 1          |
| hsa-miR-7974 NM_0011639 RAB37 | 1          |
| hsa-miR-7977 NM_0011639 RAB37 | 1          |
| hsa-miR-8060 NM_0011639 RAB37 | 1          |
| hsa-miR-8063 NM_0011639 RAB37 | 1          |
| hsa-miR-8071 NM_0011639 RAB37 | 1          |
| hsa-miR-8072 NM_0011639 RAB37 | 1          |
| hsa-miR-8078 NM_0011639 RAB37 | 1          |
| hsa-miR-8080 NM_0011639 RAB37 | 1          |
| hsa-miR-8085 NM_0011639 RAB37 | 1          |
| hsa-miR-8086 NM_0011639 RAB37 | 1          |
| hsa-miR-9500 NM_0011639 RAB37 | 1          |
| hsa-miR-9500 NM_0011639 RAB37 | 1          |
| hsa-miR-9718 NM_0011639 RAB37 | 1          |
| hsa-miR-9898 NM_0011639 RAB37 | 1          |
| hsa-miR-9903 NM_0011639 RAB37 | 1          |
| hsa-miR-1843 NM_0011639 RAB37 | 1          |
| hsa-miR-9986 NM_0011639 RAB37 | 1          |
| hsa-miR-1022 NM_0011639 RAB37 | 1          |
| hsa-miR-1039 NM_0011639 RAB37 | 1          |
| hsa-miR-1039 NM_0011639 RAB37 | 1          |
| hsa-miR-1040 NM_0011639 RAB37 | 1          |
| hsa-miR-1040 NM_0011639 RAB37 | 1          |
| hsa-miR-1052 NM_0011639 RAB37 | 1          |
| hsa-miR-1118 NM_0011639 RAB37 | 1          |
| hsa-miR-1118 NM_0011639 RAB37 | 1          |
| hsa-miR-1140 NM_0011639 RAB37 | 1          |
| hsa-miR-3059 NM_0011639 RAB37 | 1          |
| hsa-miR-3059 NM_0011639 RAB37 | 1          |
| hsa-miR-3059 NM_0011639 RAB37 | 1          |
| hsa-miR-9851 NM_0011639 RAB37 | 1          |
| hsa-miR-9851 NM_0011639 RAB37 | 1          |
| hsa-miR-1211 NM_0011639 RAB37 | 1          |
| hsa-miR-1211 NM_0011639 RAB37 | 1          |
| hsa-miR-1211 NM_0011639 RAB37 | 1          |
| hsa-miR-1212 NM_0011639 RAB37 | 1          |
| hsa-miR-6841 NM_001877 CR2    | 0.96153846 |
| hsa-miR-6841 NM_0010066 CR2   | 0.96153846 |
| hsa-miR-4535 NM_001877 CR2    | 0.97435897 |
| hsa-miR-4535 NM_0010066 CR2   | 0.97435897 |
| hsa-miR-17-3j NM_001877 CR2   | 1          |
| hsa-miR-19a- NM_001877 CR2    | 1          |
| hsa-miR-19b- NM_001877 CR2    | 1          |
| hsa-miR-203a NM_001877 CR2    | 1          |
| hsa-miR-204- NM_001877 CR2    | 1          |
| hsa-miR-216a NM_001877 CR2    | 1          |

|               |            |     |   |
|---------------|------------|-----|---|
| hsa-miR-194-  | NM_001877  | CR2 | 1 |
| hsa-miR-329-  | NM_001877  | CR2 | 1 |
| hsa-miR-493-  | NM_001877  | CR2 | 1 |
| hsa-miR-181d  | NM_001877  | CR2 | 1 |
| hsa-miR-498-  | NM_001877  | CR2 | 1 |
| hsa-miR-520e  | NM_001877  | CR2 | 1 |
| hsa-miR-515-  | NM_001877  | CR2 | 1 |
| hsa-miR-519e  | NM_001877  | CR2 | 1 |
| hsa-miR-520f  | NM_001877  | CR2 | 1 |
| hsa-miR-523-  | NM_001877  | CR2 | 1 |
| hsa-miR-520b  | NM_001877  | CR2 | 1 |
| hsa-miR-520c  | NM_001877  | CR2 | 1 |
| hsa-miR-550a  | NM_001877  | CR2 | 1 |
| hsa-miR-615-  | NM_001877  | CR2 | 1 |
| hsa-miR-652-  | NM_001877  | CR2 | 1 |
| hsa-miR-1224  | NM_001877  | CR2 | 1 |
| hsa-miR-670-  | NM_001877  | CR2 | 1 |
| hsa-miR-300   | NM_001877  | CR2 | 1 |
| hsa-miR-1204  | NM_001877  | CR2 | 1 |
| hsa-miR-1257  | NM_001877  | CR2 | 1 |
| hsa-miR-513c  | NM_001877  | CR2 | 1 |
| hsa-miR-312g  | NM_001877  | CR2 | 1 |
| hsa-miR-3136  | NM_001877  | CR2 | 1 |
| hsa-miR-3146  | NM_001877  | CR2 | 1 |
| hsa-miR-3184  | NM_001877  | CR2 | 1 |
| hsa-miR-4277  | NM_001877  | CR2 | 1 |
| hsa-miR-3616  | NM_001877  | CR2 | 1 |
| hsa-miR-3661  | NM_001877  | CR2 | 1 |
| hsa-miR-3908  | NM_001877  | CR2 | 1 |
| hsa-miR-3936  | NM_001877  | CR2 | 1 |
| hsa-miR-368g  | NM_001877  | CR2 | 1 |
| hsa-miR-4491  | NM_001877  | CR2 | 1 |
| hsa-miR-4496  | NM_001877  | CR2 | 1 |
| hsa-miR-4505  | NM_001877  | CR2 | 1 |
| hsa-miR-3975  | NM_001877  | CR2 | 1 |
| hsa-miR-4645  | NM_001877  | CR2 | 1 |
| hsa-miR-4647  | NM_001877  | CR2 | 1 |
| hsa-miR-4653  | NM_001877  | CR2 | 1 |
| hsa-miR-4657  | NM_001877  | CR2 | 1 |
| hsa-miR-4673  | NM_001877  | CR2 | 1 |
| hsa-miR-469c  | NM_001877  | CR2 | 1 |
| hsa-miR-4692  | NM_001877  | CR2 | 1 |
| hsa-miR-4692  | NM_001877  | CR2 | 1 |
| hsa-miR-470g  | NM_001877  | CR2 | 1 |
| hsa-miR-4736  | NM_001877  | CR2 | 1 |
| hsa-miR-4738  | NM_001877  | CR2 | 1 |
| hsa-miR-4761  | NM_001877  | CR2 | 1 |
| hsa-miR-5007  | NM_001877  | CR2 | 1 |
| hsa-miR-5087  | NM_001877  | CR2 | 1 |
| hsa-miR-558c  | NM_001877  | CR2 | 1 |
| hsa-miR-5591  | NM_001877  | CR2 | 1 |
| hsa-miR-6086  | NM_001877  | CR2 | 1 |
| hsa-miR-6501  | NM_001877  | CR2 | 1 |
| hsa-miR-6505  | NM_001877  | CR2 | 1 |
| hsa-miR-6742  | NM_001877  | CR2 | 1 |
| hsa-miR-6806  | NM_001877  | CR2 | 1 |
| hsa-miR-6812  | NM_001877  | CR2 | 1 |
| hsa-miR-683c  | NM_001877  | CR2 | 1 |
| hsa-miR-6864  | NM_001877  | CR2 | 1 |
| hsa-miR-6884  | NM_001877  | CR2 | 1 |
| hsa-miR-716c  | NM_001877  | CR2 | 1 |
| hsa-miR-7973  | NM_001877  | CR2 | 1 |
| hsa-miR-8058  | NM_001877  | CR2 | 1 |
| hsa-miR-8078  | NM_001877  | CR2 | 1 |
| hsa-miR-17-3j | NM_0010066 | CR2 | 1 |
| hsa-miR-19a-  | NM_0010066 | CR2 | 1 |
| hsa-miR-19b-  | NM_0010066 | CR2 | 1 |
| hsa-miR-203a  | NM_0010066 | CR2 | 1 |
| hsa-miR-204-  | NM_0010066 | CR2 | 1 |
| hsa-miR-216a  | NM_0010066 | CR2 | 1 |
| hsa-miR-194-  | NM_0010066 | CR2 | 1 |
| hsa-miR-329-  | NM_0010066 | CR2 | 1 |
| hsa-miR-493-  | NM_0010066 | CR2 | 1 |
| hsa-miR-181d  | NM_0010066 | CR2 | 1 |
| hsa-miR-498-  | NM_0010066 | CR2 | 1 |
| hsa-miR-520e  | NM_0010066 | CR2 | 1 |
| hsa-miR-515-  | NM_0010066 | CR2 | 1 |
| hsa-miR-519e  | NM_0010066 | CR2 | 1 |
| hsa-miR-520f  | NM_0010066 | CR2 | 1 |
| hsa-miR-523-  | NM_0010066 | CR2 | 1 |
| hsa-miR-520b  | NM_0010066 | CR2 | 1 |
| hsa-miR-520c  | NM_0010066 | CR2 | 1 |
| hsa-miR-550a  | NM_0010066 | CR2 | 1 |
| hsa-miR-615-  | NM_0010066 | CR2 | 1 |
| hsa-miR-652-  | NM_0010066 | CR2 | 1 |
| hsa-miR-1224  | NM_0010066 | CR2 | 1 |
| hsa-miR-670-  | NM_0010066 | CR2 | 1 |
| hsa-miR-300   | NM_0010066 | CR2 | 1 |
| hsa-miR-921   | NM_0010066 | CR2 | 1 |
| hsa-miR-1204  | NM_0010066 | CR2 | 1 |
| hsa-miR-1257  | NM_0010066 | CR2 | 1 |
| hsa-miR-513c  | NM_0010066 | CR2 | 1 |
| hsa-miR-312g  | NM_0010066 | CR2 | 1 |
| hsa-miR-3146  | NM_0010066 | CR2 | 1 |

|                               |            |
|-------------------------------|------------|
| hsa-miR-3184 NM_0010066 CR2   | 1          |
| hsa-miR-4277 NM_0010066 CR2   | 1          |
| hsa-miR-3616 NM_0010066 CR2   | 1          |
| hsa-miR-3661 NM_0010066 CR2   | 1          |
| hsa-miR-3908 NM_0010066 CR2   | 1          |
| hsa-miR-3936 NM_0010066 CR2   | 1          |
| hsa-miR-3689 NM_0010066 CR2   | 1          |
| hsa-miR-4491 NM_0010066 CR2   | 1          |
| hsa-miR-4496 NM_0010066 CR2   | 1          |
| hsa-miR-4505 NM_0010066 CR2   | 1          |
| hsa-miR-3975 NM_0010066 CR2   | 1          |
| hsa-miR-4645 NM_0010066 CR2   | 1          |
| hsa-miR-4647 NM_0010066 CR2   | 1          |
| hsa-miR-4653 NM_0010066 CR2   | 1          |
| hsa-miR-4657 NM_0010066 CR2   | 1          |
| hsa-miR-4673 NM_0010066 CR2   | 1          |
| hsa-miR-4690 NM_0010066 CR2   | 1          |
| hsa-miR-4692 NM_0010066 CR2   | 1          |
| hsa-miR-4692 NM_0010066 CR2   | 1          |
| hsa-miR-4709 NM_0010066 CR2   | 1          |
| hsa-miR-4736 NM_0010066 CR2   | 1          |
| hsa-miR-4761 NM_0010066 CR2   | 1          |
| hsa-miR-5007 NM_0010066 CR2   | 1          |
| hsa-miR-5087 NM_0010066 CR2   | 1          |
| hsa-miR-5580 NM_0010066 CR2   | 1          |
| hsa-miR-5591 NM_0010066 CR2   | 1          |
| hsa-miR-6086 NM_0010066 CR2   | 1          |
| hsa-miR-6501 NM_0010066 CR2   | 1          |
| hsa-miR-6509 NM_0010066 CR2   | 1          |
| hsa-miR-6742 NM_0010066 CR2   | 1          |
| hsa-miR-6806 NM_0010066 CR2   | 1          |
| hsa-miR-6812 NM_0010066 CR2   | 1          |
| hsa-miR-6830 NM_0010066 CR2   | 1          |
| hsa-miR-6864 NM_0010066 CR2   | 1          |
| hsa-miR-7160 NM_0010066 CR2   | 1          |
| hsa-miR-7973 NM_0010066 CR2   | 1          |
| hsa-miR-8058 NM_0010066 CR2   | 1          |
| hsa-miR-8078 NM_0010066 CR2   | 1          |
| hsa-miR-4800 NM_003154 STATH  | 0.96153846 |
| hsa-miR-6858 NM_003154 STATH  | 0.96153846 |
| hsa-miR-4800 NM_0010091 STATH | 0.96153846 |
| hsa-miR-6858 NM_0010091 STATH | 0.96153846 |
| hsa-miR-185- NM_003154 STATH  | 1          |
| hsa-miR-365a NM_003154 STATH  | 1          |
| hsa-miR-345- NM_003154 STATH  | 1          |
| hsa-miR-431- NM_003154 STATH  | 1          |
| hsa-miR-512- NM_003154 STATH  | 1          |
| hsa-miR-92b- NM_003154 STATH  | 1          |
| hsa-miR-611 NM_003154 STATH   | 1          |
| hsa-miR-320c NM_003154 STATH  | 1          |
| hsa-miR-769- NM_003154 STATH  | 1          |
| hsa-miR-765 NM_003154 STATH   | 1          |
| hsa-miR-1182 NM_003154 STATH  | 1          |
| hsa-miR-1207 NM_003154 STATH  | 1          |
| hsa-miR-3198 NM_003154 STATH  | 1          |
| hsa-miR-3689 NM_003154 STATH  | 1          |
| hsa-miR-3928 NM_003154 STATH  | 1          |
| hsa-miR-3689 NM_003154 STATH  | 1          |
| hsa-miR-4646 NM_003154 STATH  | 1          |
| hsa-miR-4650 NM_003154 STATH  | 1          |
| hsa-miR-4672 NM_003154 STATH  | 1          |
| hsa-miR-3529 NM_003154 STATH  | 1          |
| hsa-miR-4728 NM_003154 STATH  | 1          |
| hsa-miR-4747 NM_003154 STATH  | 1          |
| hsa-miR-4769 NM_003154 STATH  | 1          |
| hsa-miR-2467 NM_003154 STATH  | 1          |
| hsa-miR-5189 NM_003154 STATH  | 1          |
| hsa-miR-6131 NM_003154 STATH  | 1          |
| hsa-miR-6501 NM_003154 STATH  | 1          |
| hsa-miR-6778 NM_003154 STATH  | 1          |
| hsa-miR-6780 NM_003154 STATH  | 1          |
| hsa-miR-6811 NM_003154 STATH  | 1          |
| hsa-miR-6831 NM_003154 STATH  | 1          |
| hsa-miR-6833 NM_003154 STATH  | 1          |
| hsa-miR-6879 NM_003154 STATH  | 1          |
| hsa-miR-6883 NM_003154 STATH  | 1          |
| hsa-miR-7161 NM_003154 STATH  | 1          |
| hsa-miR-185- NM_0010091 STATH | 1          |
| hsa-miR-365a NM_0010091 STATH | 1          |
| hsa-miR-345- NM_0010091 STATH | 1          |
| hsa-miR-431- NM_0010091 STATH | 1          |
| hsa-miR-512- NM_0010091 STATH | 1          |
| hsa-miR-92b- NM_0010091 STATH | 1          |
| hsa-miR-611 NM_0010091 STATH  | 1          |
| hsa-miR-320c NM_0010091 STATH | 1          |
| hsa-miR-769- NM_0010091 STATH | 1          |
| hsa-miR-765 NM_0010091 STATH  | 1          |
| hsa-miR-1182 NM_0010091 STATH | 1          |
| hsa-miR-1207 NM_0010091 STATH | 1          |
| hsa-miR-3198 NM_0010091 STATH | 1          |
| hsa-miR-3689 NM_0010091 STATH | 1          |
| hsa-miR-3928 NM_0010091 STATH | 1          |
| hsa-miR-3689 NM_0010091 STATH | 1          |
| hsa-miR-4646 NM_0010091 STATH | 1          |

|                                 |            |
|---------------------------------|------------|
| hsa-miR-465C NM_0010091 STATH   | 1          |
| hsa-miR-4672 NM_0010091 STATH   | 1          |
| hsa-miR-3529 NM_0010091 STATH   | 1          |
| hsa-miR-4728 NM_0010091 STATH   | 1          |
| hsa-miR-4747 NM_0010091 STATH   | 1          |
| hsa-miR-4769 NM_0010091 STATH   | 1          |
| hsa-miR-2467 NM_0010091 STATH   | 1          |
| hsa-miR-5189 NM_0010091 STATH   | 1          |
| hsa-miR-6131 NM_0010091 STATH   | 1          |
| hsa-miR-6778 NM_0010091 STATH   | 1          |
| hsa-miR-678C NM_0010091 STATH   | 1          |
| hsa-miR-6811 NM_0010091 STATH   | 1          |
| hsa-miR-6831 NM_0010091 STATH   | 1          |
| hsa-miR-6833 NM_0010091 STATH   | 1          |
| hsa-miR-6879 NM_0010091 STATH   | 1          |
| hsa-miR-6883 NM_0010091 STATH   | 1          |
| hsa-miR-7161 NM_0010091 STATH   | 1          |
| hsa-miR-675C NM_0013179 SLC27A6 | 0.96153846 |
| hsa-miR-483- NM_014031 SLC27A6  | 0.96153846 |
| hsa-miR-675C NM_014031 SLC27A6  | 0.96153846 |
| hsa-miR-6751 NM_014031 SLC27A6  | 0.96153846 |
| hsa-miR-296- NM_0010173 SLC27A6 | 0.96153846 |
| hsa-miR-139- NM_0013179 SLC27A6 | 1          |
| hsa-miR-211- NM_0013179 SLC27A6 | 1          |
| hsa-miR-219a NM_0013179 SLC27A6 | 1          |
| hsa-miR-130b NM_0013179 SLC27A6 | 1          |
| hsa-miR-365a NM_0013179 SLC27A6 | 1          |
| hsa-miR-365b NM_0013179 SLC27A6 | 1          |
| hsa-miR-490- NM_0013179 SLC27A6 | 1          |
| hsa-miR-519d NM_0013179 SLC27A6 | 1          |
| hsa-miR-503- NM_0013179 SLC27A6 | 1          |
| hsa-miR-605- NM_0013179 SLC27A6 | 1          |
| hsa-miR-635 NM_0013179 SLC27A6  | 1          |
| hsa-miR-550a NM_0013179 SLC27A6 | 1          |
| hsa-miR-1468 NM_0013179 SLC27A6 | 1          |
| hsa-miR-449c NM_0013179 SLC27A6 | 1          |
| hsa-miR-675- NM_0013179 SLC27A6 | 1          |
| hsa-miR-891a NM_0013179 SLC27A6 | 1          |
| hsa-miR-1825 NM_0013179 SLC27A6 | 1          |
| hsa-miR-3667 NM_0013179 SLC27A6 | 1          |
| hsa-miR-3679 NM_0013179 SLC27A6 | 1          |
| hsa-miR-642b NM_0013179 SLC27A6 | 1          |
| hsa-miR-4433 NM_0013179 SLC27A6 | 1          |
| hsa-miR-4687 NM_0013179 SLC27A6 | 1          |
| hsa-miR-5193 NM_0013179 SLC27A6 | 1          |
| hsa-miR-664b NM_0013179 SLC27A6 | 1          |
| hsa-miR-6507 NM_0013179 SLC27A6 | 1          |
| hsa-miR-6734 NM_0013179 SLC27A6 | 1          |
| hsa-miR-6741 NM_0013179 SLC27A6 | 1          |
| hsa-miR-6758 NM_0013179 SLC27A6 | 1          |
| hsa-miR-6763 NM_0013179 SLC27A6 | 1          |
| hsa-miR-6769 NM_0013179 SLC27A6 | 1          |
| hsa-miR-6778 NM_0013179 SLC27A6 | 1          |
| hsa-miR-6786 NM_0013179 SLC27A6 | 1          |
| hsa-miR-6795 NM_0013179 SLC27A6 | 1          |
| hsa-miR-6796 NM_0013179 SLC27A6 | 1          |
| hsa-miR-6802 NM_0013179 SLC27A6 | 1          |
| hsa-miR-6804 NM_0013179 SLC27A6 | 1          |
| hsa-miR-6809 NM_0013179 SLC27A6 | 1          |
| hsa-miR-6826 NM_0013179 SLC27A6 | 1          |
| hsa-miR-6828 NM_0013179 SLC27A6 | 1          |
| hsa-miR-6832 NM_0013179 SLC27A6 | 1          |
| hsa-miR-6833 NM_0013179 SLC27A6 | 1          |
| hsa-miR-678C NM_0013179 SLC27A6 | 1          |
| hsa-miR-6846 NM_0013179 SLC27A6 | 1          |
| hsa-miR-6859 NM_0013179 SLC27A6 | 1          |
| hsa-miR-6882 NM_0013179 SLC27A6 | 1          |
| hsa-miR-6883 NM_0013179 SLC27A6 | 1          |
| hsa-miR-6886 NM_0013179 SLC27A6 | 1          |
| hsa-miR-6887 NM_0013179 SLC27A6 | 1          |
| hsa-miR-6894 NM_0013179 SLC27A6 | 1          |
| hsa-miR-7114 NM_0013179 SLC27A6 | 1          |
| hsa-miR-7162 NM_0013179 SLC27A6 | 1          |
| hsa-miR-1039 NM_0013179 SLC27A6 | 1          |
| hsa-miR-139- NM_014031 SLC27A6  | 1          |
| hsa-miR-211- NM_014031 SLC27A6  | 1          |
| hsa-miR-219a NM_014031 SLC27A6  | 1          |
| hsa-miR-130b NM_014031 SLC27A6  | 1          |
| hsa-miR-365a NM_014031 SLC27A6  | 1          |
| hsa-miR-365b NM_014031 SLC27A6  | 1          |
| hsa-miR-328- NM_014031 SLC27A6  | 1          |
| hsa-miR-490- NM_014031 SLC27A6  | 1          |
| hsa-miR-519d NM_014031 SLC27A6  | 1          |
| hsa-miR-503- NM_014031 SLC27A6  | 1          |
| hsa-miR-605- NM_014031 SLC27A6  | 1          |
| hsa-miR-1468 NM_014031 SLC27A6  | 1          |
| hsa-miR-449c NM_014031 SLC27A6  | 1          |
| hsa-miR-675- NM_014031 SLC27A6  | 1          |
| hsa-miR-891a NM_014031 SLC27A6  | 1          |
| hsa-miR-1825 NM_014031 SLC27A6  | 1          |
| hsa-miR-2276 NM_014031 SLC27A6  | 1          |
| hsa-miR-3667 NM_014031 SLC27A6  | 1          |
| hsa-miR-3679 NM_014031 SLC27A6  | 1          |
| hsa-miR-642b NM_014031 SLC27A6  | 1          |

|                          |         |            |
|--------------------------|---------|------------|
| hsa-miR-4433 NM_014031   | SLC27A6 | 1          |
| hsa-miR-4687 NM_014031   | SLC27A6 | 1          |
| hsa-miR-4764 NM_014031   | SLC27A6 | 1          |
| hsa-miR-5193 NM_014031   | SLC27A6 | 1          |
| hsa-miR-664b NM_014031   | SLC27A6 | 1          |
| hsa-miR-6734 NM_014031   | SLC27A6 | 1          |
| hsa-miR-6741 NM_014031   | SLC27A6 | 1          |
| hsa-miR-6758 NM_014031   | SLC27A6 | 1          |
| hsa-miR-6763 NM_014031   | SLC27A6 | 1          |
| hsa-miR-6765 NM_014031   | SLC27A6 | 1          |
| hsa-miR-6778 NM_014031   | SLC27A6 | 1          |
| hsa-miR-6786 NM_014031   | SLC27A6 | 1          |
| hsa-miR-6795 NM_014031   | SLC27A6 | 1          |
| hsa-miR-6796 NM_014031   | SLC27A6 | 1          |
| hsa-miR-6802 NM_014031   | SLC27A6 | 1          |
| hsa-miR-6804 NM_014031   | SLC27A6 | 1          |
| hsa-miR-6805 NM_014031   | SLC27A6 | 1          |
| hsa-miR-6826 NM_014031   | SLC27A6 | 1          |
| hsa-miR-6828 NM_014031   | SLC27A6 | 1          |
| hsa-miR-6832 NM_014031   | SLC27A6 | 1          |
| hsa-miR-6833 NM_014031   | SLC27A6 | 1          |
| hsa-miR-678c NM_014031   | SLC27A6 | 1          |
| hsa-miR-6846 NM_014031   | SLC27A6 | 1          |
| hsa-miR-6855 NM_014031   | SLC27A6 | 1          |
| hsa-miR-6882 NM_014031   | SLC27A6 | 1          |
| hsa-miR-6883 NM_014031   | SLC27A6 | 1          |
| hsa-miR-6886 NM_014031   | SLC27A6 | 1          |
| hsa-miR-6887 NM_014031   | SLC27A6 | 1          |
| hsa-miR-6894 NM_014031   | SLC27A6 | 1          |
| hsa-miR-7114 NM_014031   | SLC27A6 | 1          |
| hsa-miR-7162 NM_014031   | SLC27A6 | 1          |
| hsa-miR-1035 NM_014031   | SLC27A6 | 1          |
| hsa-let-7c-3p NM_0010173 | SLC27A6 | 1          |
| hsa-miR-522- NM_0010173  | SLC27A6 | 1          |
| hsa-miR-503- NM_0010173  | SLC27A6 | 1          |
| hsa-miR-1468 NM_0010173  | SLC27A6 | 1          |
| hsa-miR-891a NM_0010173  | SLC27A6 | 1          |
| hsa-miR-513c NM_0010173  | SLC27A6 | 1          |
| hsa-miR-1825 NM_0010173  | SLC27A6 | 1          |
| hsa-miR-642b NM_0010173  | SLC27A6 | 1          |
| hsa-miR-464e NM_0010173  | SLC27A6 | 1          |
| hsa-miR-501c NM_0010173  | SLC27A6 | 1          |
| hsa-miR-5584 NM_0010173  | SLC27A6 | 1          |
| hsa-miR-6515 NM_0010173  | SLC27A6 | 1          |
| hsa-miR-6734 NM_0010173  | SLC27A6 | 1          |
| hsa-miR-675c NM_0010173  | SLC27A6 | 1          |
| hsa-miR-6765 NM_0010173  | SLC27A6 | 1          |
| hsa-miR-6778 NM_0010173  | SLC27A6 | 1          |
| hsa-miR-678c NM_0010173  | SLC27A6 | 1          |
| hsa-miR-6786 NM_0010173  | SLC27A6 | 1          |
| hsa-miR-6802 NM_0010173  | SLC27A6 | 1          |
| hsa-miR-6805 NM_0010173  | SLC27A6 | 1          |
| hsa-miR-6826 NM_0010173  | SLC27A6 | 1          |
| hsa-miR-6833 NM_0010173  | SLC27A6 | 1          |
| hsa-miR-6846 NM_0010173  | SLC27A6 | 1          |
| hsa-miR-6878 NM_0010173  | SLC27A6 | 1          |
| hsa-miR-6882 NM_0010173  | SLC27A6 | 1          |
| hsa-miR-6883 NM_0010173  | SLC27A6 | 1          |
| hsa-miR-6886 NM_0010173  | SLC27A6 | 1          |
| hsa-miR-7162 NM_0010173  | SLC27A6 | 1          |
| hsa-miR-1035 NM_0010173  | SLC27A6 | 1          |
| hsa-miR-197- NM_001549   | IFIT3   | 0.96153846 |
| hsa-miR-770- NM_001549   | IFIT3   | 0.96153846 |
| hsa-miR-1273 NM_001549   | IFIT3   | 0.96153846 |
| hsa-miR-4254 NM_001549   | IFIT3   | 0.96153846 |
| hsa-miR-4418 NM_001549   | IFIT3   | 0.96153846 |
| hsa-miR-5194 NM_001549   | IFIT3   | 0.96153846 |
| hsa-miR-6804 NM_001549   | IFIT3   | 0.96153846 |
| hsa-miR-6877 NM_001549   | IFIT3   | 0.96153846 |
| hsa-miR-1035 NM_001549   | IFIT3   | 0.96153846 |
| hsa-miR-197- NM_0010316  | IFIT3   | 0.96153846 |
| hsa-miR-770- NM_0010316  | IFIT3   | 0.96153846 |
| hsa-miR-1273 NM_0010316  | IFIT3   | 0.96153846 |
| hsa-miR-4254 NM_0010316  | IFIT3   | 0.96153846 |
| hsa-miR-4418 NM_0010316  | IFIT3   | 0.96153846 |
| hsa-miR-5194 NM_0010316  | IFIT3   | 0.96153846 |
| hsa-miR-6804 NM_0010316  | IFIT3   | 0.96153846 |
| hsa-miR-6877 NM_0010316  | IFIT3   | 0.96153846 |
| hsa-miR-1035 NM_0010316  | IFIT3   | 0.96153846 |
| hsa-miR-442c NM_001549   | IFIT3   | 0.97435897 |
| hsa-miR-4433 NM_001549   | IFIT3   | 0.97435897 |
| hsa-miR-1211 NM_001549   | IFIT3   | 0.97435897 |
| hsa-miR-4433 NM_0010316  | IFIT3   | 0.97435897 |
| hsa-miR-1211 NM_0010316  | IFIT3   | 0.97435897 |
| hsa-miR-4436 NM_001549   | IFIT3   | 0.97435897 |
| hsa-miR-6071 NM_001549   | IFIT3   | 0.97435897 |
| hsa-miR-6746 NM_001549   | IFIT3   | 0.97435897 |
| hsa-miR-4436 NM_0010316  | IFIT3   | 0.97435897 |
| hsa-miR-6071 NM_0010316  | IFIT3   | 0.97435897 |
| hsa-miR-6746 NM_0010316  | IFIT3   | 0.97435897 |
| hsa-miR-378g NM_001549   | IFIT3   | 0.98076923 |
| hsa-miR-6895 NM_001549   | IFIT3   | 0.98076923 |
| hsa-miR-378g NM_0010316  | IFIT3   | 0.98076923 |
| hsa-miR-6895 NM_0010316  | IFIT3   | 0.98076923 |

|                          |       |   |
|--------------------------|-------|---|
| hsa-let-7a-2-3 NM_001549 | IFIT3 | 1 |
| hsa-let-7b-5p NM_001549  | IFIT3 | 1 |
| hsa-let-7e-3p NM_001549  | IFIT3 | 1 |
| hsa-miR-92a- NM_001549   | IFIT3 | 1 |
| hsa-miR-93-5j NM_001549  | IFIT3 | 1 |
| hsa-miR-100- NM_001549   | IFIT3 | 1 |
| hsa-miR-103a NM_001549   | IFIT3 | 1 |
| hsa-miR-107 NM_001549    | IFIT3 | 1 |
| hsa-miR-208a NM_001549   | IFIT3 | 1 |
| hsa-miR-211- NM_001549   | IFIT3 | 1 |
| hsa-miR-222- NM_001549   | IFIT3 | 1 |
| hsa-miR-145- NM_001549   | IFIT3 | 1 |
| hsa-miR-149- NM_001549   | IFIT3 | 1 |
| hsa-miR-370- NM_001549   | IFIT3 | 1 |
| hsa-miR-378a NM_001549   | IFIT3 | 1 |
| hsa-miR-328- NM_001549   | IFIT3 | 1 |
| hsa-miR-135t NM_001549   | IFIT3 | 1 |
| hsa-miR-148t NM_001549   | IFIT3 | 1 |
| hsa-miR-324- NM_001549   | IFIT3 | 1 |
| hsa-miR-511- NM_001549   | IFIT3 | 1 |
| hsa-miR-512- NM_001549   | IFIT3 | 1 |
| hsa-miR-503- NM_001549   | IFIT3 | 1 |
| hsa-miR-532- NM_001549   | IFIT3 | 1 |
| hsa-miR-92b- NM_001549   | IFIT3 | 1 |
| hsa-miR-558 NM_001549    | IFIT3 | 1 |
| hsa-miR-572 NM_001549    | IFIT3 | 1 |
| hsa-miR-614 NM_001549    | IFIT3 | 1 |
| hsa-miR-615- NM_001549   | IFIT3 | 1 |
| hsa-miR-636 NM_001549    | IFIT3 | 1 |
| hsa-miR-645 NM_001549    | IFIT3 | 1 |
| hsa-miR-663a NM_001549   | IFIT3 | 1 |
| hsa-miR-659- NM_001549   | IFIT3 | 1 |
| hsa-miR-762 NM_001549    | IFIT3 | 1 |
| hsa-miR-762 NM_001549    | IFIT3 | 1 |
| hsa-miR-2113 NM_001549   | IFIT3 | 1 |
| hsa-miR-892b NM_001549   | IFIT3 | 1 |
| hsa-miR-885- NM_001549   | IFIT3 | 1 |
| hsa-miR-877- NM_001549   | IFIT3 | 1 |
| hsa-miR-935 NM_001549    | IFIT3 | 1 |
| hsa-miR-939- NM_001549   | IFIT3 | 1 |
| hsa-miR-118c NM_001549   | IFIT3 | 1 |
| hsa-miR-1183 NM_001549   | IFIT3 | 1 |
| hsa-miR-1228 NM_001549   | IFIT3 | 1 |
| hsa-miR-1231 NM_001549   | IFIT3 | 1 |
| hsa-miR-1238 NM_001549   | IFIT3 | 1 |
| hsa-miR-1203 NM_001549   | IFIT3 | 1 |
| hsa-miR-663b NM_001549   | IFIT3 | 1 |
| hsa-miR-1303 NM_001549   | IFIT3 | 1 |
| hsa-miR-1249 NM_001549   | IFIT3 | 1 |
| hsa-miR-125c NM_001549   | IFIT3 | 1 |
| hsa-miR-1251 NM_001549   | IFIT3 | 1 |
| hsa-miR-1266 NM_001549   | IFIT3 | 1 |
| hsa-miR-1267 NM_001549   | IFIT3 | 1 |
| hsa-miR-1307 NM_001549   | IFIT3 | 1 |
| hsa-miR-1469 NM_001549   | IFIT3 | 1 |
| hsa-miR-1908 NM_001549   | IFIT3 | 1 |
| hsa-miR-1911 NM_001549   | IFIT3 | 1 |
| hsa-miR-1914 NM_001549   | IFIT3 | 1 |
| hsa-miR-1915 NM_001549   | IFIT3 | 1 |
| hsa-miR-2276 NM_001549   | IFIT3 | 1 |
| hsa-miR-718 NM_001549    | IFIT3 | 1 |
| hsa-miR-2861 NM_001549   | IFIT3 | 1 |
| hsa-miR-548s NM_001549   | IFIT3 | 1 |
| hsa-miR-3135 NM_001549   | IFIT3 | 1 |
| hsa-miR-3141 NM_001549   | IFIT3 | 1 |
| hsa-miR-3158 NM_001549   | IFIT3 | 1 |
| hsa-miR-3166 NM_001549   | IFIT3 | 1 |
| hsa-miR-323b NM_001549   | IFIT3 | 1 |
| hsa-miR-3176 NM_001549   | IFIT3 | 1 |
| hsa-miR-3184 NM_001549   | IFIT3 | 1 |
| hsa-miR-3189 NM_001549   | IFIT3 | 1 |
| hsa-miR-3191 NM_001549   | IFIT3 | 1 |
| hsa-miR-3194 NM_001549   | IFIT3 | 1 |
| hsa-miR-4296 NM_001549   | IFIT3 | 1 |
| hsa-miR-4312 NM_001549   | IFIT3 | 1 |
| hsa-miR-4258 NM_001549   | IFIT3 | 1 |
| hsa-miR-4263 NM_001549   | IFIT3 | 1 |
| hsa-miR-4281 NM_001549   | IFIT3 | 1 |
| hsa-miR-4289 NM_001549   | IFIT3 | 1 |
| hsa-miR-3622 NM_001549   | IFIT3 | 1 |
| hsa-miR-3622 NM_001549   | IFIT3 | 1 |
| hsa-miR-3652 NM_001549   | IFIT3 | 1 |
| hsa-miR-3663 NM_001549   | IFIT3 | 1 |
| hsa-miR-3677 NM_001549   | IFIT3 | 1 |
| hsa-miR-3907 NM_001549   | IFIT3 | 1 |
| hsa-miR-3934 NM_001549   | IFIT3 | 1 |
| hsa-miR-394c NM_001549   | IFIT3 | 1 |
| hsa-miR-378g NM_001549   | IFIT3 | 1 |
| hsa-miR-4425 NM_001549   | IFIT3 | 1 |
| hsa-miR-4428 NM_001549   | IFIT3 | 1 |
| hsa-miR-443c NM_001549   | IFIT3 | 1 |
| hsa-miR-4433 NM_001549   | IFIT3 | 1 |
| hsa-miR-4441 NM_001549   | IFIT3 | 1 |
| hsa-miR-4448 NM_001549   | IFIT3 | 1 |

|                        |       |   |
|------------------------|-------|---|
| hsa-miR-4466 NM_001549 | IFIT3 | 1 |
| hsa-miR-4474 NM_001549 | IFIT3 | 1 |
| hsa-miR-2392 NM_001549 | IFIT3 | 1 |
| hsa-miR-4525 NM_001549 | IFIT3 | 1 |
| hsa-miR-1587 NM_001549 | IFIT3 | 1 |
| hsa-miR-4537 NM_001549 | IFIT3 | 1 |
| hsa-miR-4632 NM_001549 | IFIT3 | 1 |
| hsa-miR-4633 NM_001549 | IFIT3 | 1 |
| hsa-miR-4638 NM_001549 | IFIT3 | 1 |
| hsa-miR-4665 NM_001549 | IFIT3 | 1 |
| hsa-miR-4673 NM_001549 | IFIT3 | 1 |
| hsa-miR-4697 NM_001549 | IFIT3 | 1 |
| hsa-miR-4700 NM_001549 | IFIT3 | 1 |
| hsa-miR-4701 NM_001549 | IFIT3 | 1 |
| hsa-miR-4707 NM_001549 | IFIT3 | 1 |
| hsa-miR-4715 NM_001549 | IFIT3 | 1 |
| hsa-miR-4717 NM_001549 | IFIT3 | 1 |
| hsa-miR-4717 NM_001549 | IFIT3 | 1 |
| hsa-miR-4721 NM_001549 | IFIT3 | 1 |
| hsa-miR-4731 NM_001549 | IFIT3 | 1 |
| hsa-miR-4734 NM_001549 | IFIT3 | 1 |
| hsa-miR-4738 NM_001549 | IFIT3 | 1 |
| hsa-miR-4750 NM_001549 | IFIT3 | 1 |
| hsa-miR-4753 NM_001549 | IFIT3 | 1 |
| hsa-miR-4761 NM_001549 | IFIT3 | 1 |
| hsa-miR-4767 NM_001549 | IFIT3 | 1 |
| hsa-miR-4436 NM_001549 | IFIT3 | 1 |
| hsa-miR-4783 NM_001549 | IFIT3 | 1 |
| hsa-miR-5001 NM_001549 | IFIT3 | 1 |
| hsa-miR-5002 NM_001549 | IFIT3 | 1 |
| hsa-miR-5090 NM_001549 | IFIT3 | 1 |
| hsa-miR-5196 NM_001549 | IFIT3 | 1 |
| hsa-miR-5572 NM_001549 | IFIT3 | 1 |
| hsa-miR-5587 NM_001549 | IFIT3 | 1 |
| hsa-miR-5690 NM_001549 | IFIT3 | 1 |
| hsa-miR-5704 NM_001549 | IFIT3 | 1 |
| hsa-miR-6085 NM_001549 | IFIT3 | 1 |
| hsa-miR-6127 NM_001549 | IFIT3 | 1 |
| hsa-miR-6133 NM_001549 | IFIT3 | 1 |
| hsa-miR-6511 NM_001549 | IFIT3 | 1 |
| hsa-miR-6515 NM_001549 | IFIT3 | 1 |
| hsa-miR-6724 NM_001549 | IFIT3 | 1 |
| hsa-miR-892c NM_001549 | IFIT3 | 1 |
| hsa-miR-6726 NM_001549 | IFIT3 | 1 |
| hsa-miR-6728 NM_001549 | IFIT3 | 1 |
| hsa-miR-6732 NM_001549 | IFIT3 | 1 |
| hsa-miR-6732 NM_001549 | IFIT3 | 1 |
| hsa-miR-6742 NM_001549 | IFIT3 | 1 |
| hsa-miR-6743 NM_001549 | IFIT3 | 1 |
| hsa-miR-6747 NM_001549 | IFIT3 | 1 |
| hsa-miR-6749 NM_001549 | IFIT3 | 1 |
| hsa-miR-6752 NM_001549 | IFIT3 | 1 |
| hsa-miR-6754 NM_001549 | IFIT3 | 1 |
| hsa-miR-6762 NM_001549 | IFIT3 | 1 |
| hsa-miR-6764 NM_001549 | IFIT3 | 1 |
| hsa-miR-6765 NM_001549 | IFIT3 | 1 |
| hsa-miR-6769 NM_001549 | IFIT3 | 1 |
| hsa-miR-6772 NM_001549 | IFIT3 | 1 |
| hsa-miR-6772 NM_001549 | IFIT3 | 1 |
| hsa-miR-6774 NM_001549 | IFIT3 | 1 |
| hsa-miR-6776 NM_001549 | IFIT3 | 1 |
| hsa-miR-6777 NM_001549 | IFIT3 | 1 |
| hsa-miR-6780 NM_001549 | IFIT3 | 1 |
| hsa-miR-6782 NM_001549 | IFIT3 | 1 |
| hsa-miR-6785 NM_001549 | IFIT3 | 1 |
| hsa-miR-6790 NM_001549 | IFIT3 | 1 |
| hsa-miR-6791 NM_001549 | IFIT3 | 1 |
| hsa-miR-6792 NM_001549 | IFIT3 | 1 |
| hsa-miR-6795 NM_001549 | IFIT3 | 1 |
| hsa-miR-6813 NM_001549 | IFIT3 | 1 |
| hsa-miR-6817 NM_001549 | IFIT3 | 1 |
| hsa-miR-6819 NM_001549 | IFIT3 | 1 |
| hsa-miR-6821 NM_001549 | IFIT3 | 1 |
| hsa-miR-6823 NM_001549 | IFIT3 | 1 |
| hsa-miR-6823 NM_001549 | IFIT3 | 1 |
| hsa-miR-6824 NM_001549 | IFIT3 | 1 |
| hsa-miR-6828 NM_001549 | IFIT3 | 1 |
| hsa-miR-6831 NM_001549 | IFIT3 | 1 |
| hsa-miR-6833 NM_001549 | IFIT3 | 1 |
| hsa-miR-6780 NM_001549 | IFIT3 | 1 |
| hsa-miR-6841 NM_001549 | IFIT3 | 1 |
| hsa-miR-6842 NM_001549 | IFIT3 | 1 |
| hsa-miR-6846 NM_001549 | IFIT3 | 1 |
| hsa-miR-6848 NM_001549 | IFIT3 | 1 |
| hsa-miR-6850 NM_001549 | IFIT3 | 1 |
| hsa-miR-6860 NM_001549 | IFIT3 | 1 |
| hsa-miR-6879 NM_001549 | IFIT3 | 1 |
| hsa-miR-6880 NM_001549 | IFIT3 | 1 |
| hsa-miR-6886 NM_001549 | IFIT3 | 1 |
| hsa-miR-6891 NM_001549 | IFIT3 | 1 |
| hsa-miR-6893 NM_001549 | IFIT3 | 1 |
| hsa-miR-7107 NM_001549 | IFIT3 | 1 |
| hsa-miR-7107 NM_001549 | IFIT3 | 1 |
| hsa-miR-7108 NM_001549 | IFIT3 | 1 |

|                           |       |   |
|---------------------------|-------|---|
| hsa-miR-715C NM_001549    | IFIT3 | 1 |
| hsa-miR-7848 NM_001549    | IFIT3 | 1 |
| hsa-miR-1022 NM_001549    | IFIT3 | 1 |
| hsa-miR-1118 NM_001549    | IFIT3 | 1 |
| hsa-miR-9851 NM_001549    | IFIT3 | 1 |
| hsa-miR-1211 NM_001549    | IFIT3 | 1 |
| hsa-let-7a-2-3 NM_0010316 | IFIT3 | 1 |
| hsa-let-7b-5p NM_0010316  | IFIT3 | 1 |
| hsa-let-7e-3p NM_0010316  | IFIT3 | 1 |
| hsa-miR-92a- NM_0010316   | IFIT3 | 1 |
| hsa-miR-93-5j NM_0010316  | IFIT3 | 1 |
| hsa-miR-100- NM_0010316   | IFIT3 | 1 |
| hsa-miR-103a NM_0010316   | IFIT3 | 1 |
| hsa-miR-107 NM_0010316    | IFIT3 | 1 |
| hsa-miR-208a NM_0010316   | IFIT3 | 1 |
| hsa-miR-211- NM_0010316   | IFIT3 | 1 |
| hsa-miR-222- NM_0010316   | IFIT3 | 1 |
| hsa-miR-145- NM_0010316   | IFIT3 | 1 |
| hsa-miR-149- NM_0010316   | IFIT3 | 1 |
| hsa-miR-370- NM_0010316   | IFIT3 | 1 |
| hsa-miR-378a NM_0010316   | IFIT3 | 1 |
| hsa-miR-328- NM_0010316   | IFIT3 | 1 |
| hsa-miR-135t NM_0010316   | IFIT3 | 1 |
| hsa-miR-148t NM_0010316   | IFIT3 | 1 |
| hsa-miR-324- NM_0010316   | IFIT3 | 1 |
| hsa-miR-511- NM_0010316   | IFIT3 | 1 |
| hsa-miR-512- NM_0010316   | IFIT3 | 1 |
| hsa-miR-503- NM_0010316   | IFIT3 | 1 |
| hsa-miR-532- NM_0010316   | IFIT3 | 1 |
| hsa-miR-92b- NM_0010316   | IFIT3 | 1 |
| hsa-miR-558 NM_0010316    | IFIT3 | 1 |
| hsa-miR-572 NM_0010316    | IFIT3 | 1 |
| hsa-miR-614 NM_0010316    | IFIT3 | 1 |
| hsa-miR-615- NM_0010316   | IFIT3 | 1 |
| hsa-miR-636 NM_0010316    | IFIT3 | 1 |
| hsa-miR-645 NM_0010316    | IFIT3 | 1 |
| hsa-miR-663a NM_0010316   | IFIT3 | 1 |
| hsa-miR-659- NM_0010316   | IFIT3 | 1 |
| hsa-miR-762 NM_0010316    | IFIT3 | 1 |
| hsa-miR-762 NM_0010316    | IFIT3 | 1 |
| hsa-miR-2113 NM_0010316   | IFIT3 | 1 |
| hsa-miR-892t NM_0010316   | IFIT3 | 1 |
| hsa-miR-885- NM_0010316   | IFIT3 | 1 |
| hsa-miR-877- NM_0010316   | IFIT3 | 1 |
| hsa-miR-935 NM_0010316    | IFIT3 | 1 |
| hsa-miR-939- NM_0010316   | IFIT3 | 1 |
| hsa-miR-118C NM_0010316   | IFIT3 | 1 |
| hsa-miR-1183 NM_0010316   | IFIT3 | 1 |
| hsa-miR-1228 NM_0010316   | IFIT3 | 1 |
| hsa-miR-1231 NM_0010316   | IFIT3 | 1 |
| hsa-miR-1238 NM_0010316   | IFIT3 | 1 |
| hsa-miR-1203 NM_0010316   | IFIT3 | 1 |
| hsa-miR-663t NM_0010316   | IFIT3 | 1 |
| hsa-miR-1303 NM_0010316   | IFIT3 | 1 |
| hsa-miR-1249 NM_0010316   | IFIT3 | 1 |
| hsa-miR-125C NM_0010316   | IFIT3 | 1 |
| hsa-miR-1251 NM_0010316   | IFIT3 | 1 |
| hsa-miR-1266 NM_0010316   | IFIT3 | 1 |
| hsa-miR-1267 NM_0010316   | IFIT3 | 1 |
| hsa-miR-1307 NM_0010316   | IFIT3 | 1 |
| hsa-miR-1469 NM_0010316   | IFIT3 | 1 |
| hsa-miR-1908 NM_0010316   | IFIT3 | 1 |
| hsa-miR-1911 NM_0010316   | IFIT3 | 1 |
| hsa-miR-1914 NM_0010316   | IFIT3 | 1 |
| hsa-miR-1915 NM_0010316   | IFIT3 | 1 |
| hsa-miR-1976 NM_0010316   | IFIT3 | 1 |
| hsa-miR-2276 NM_0010316   | IFIT3 | 1 |
| hsa-miR-718 NM_0010316    | IFIT3 | 1 |
| hsa-miR-2861 NM_0010316   | IFIT3 | 1 |
| hsa-miR-548s NM_0010316   | IFIT3 | 1 |
| hsa-miR-3135 NM_0010316   | IFIT3 | 1 |
| hsa-miR-3141 NM_0010316   | IFIT3 | 1 |
| hsa-miR-3166 NM_0010316   | IFIT3 | 1 |
| hsa-miR-323t NM_0010316   | IFIT3 | 1 |
| hsa-miR-3176 NM_0010316   | IFIT3 | 1 |
| hsa-miR-3184 NM_0010316   | IFIT3 | 1 |
| hsa-miR-3189 NM_0010316   | IFIT3 | 1 |
| hsa-miR-3191 NM_0010316   | IFIT3 | 1 |
| hsa-miR-3194 NM_0010316   | IFIT3 | 1 |
| hsa-miR-4296 NM_0010316   | IFIT3 | 1 |
| hsa-miR-4312 NM_0010316   | IFIT3 | 1 |
| hsa-miR-4258 NM_0010316   | IFIT3 | 1 |
| hsa-miR-4263 NM_0010316   | IFIT3 | 1 |
| hsa-miR-4281 NM_0010316   | IFIT3 | 1 |
| hsa-miR-4289 NM_0010316   | IFIT3 | 1 |
| hsa-miR-3622 NM_0010316   | IFIT3 | 1 |
| hsa-miR-3622 NM_0010316   | IFIT3 | 1 |
| hsa-miR-3652 NM_0010316   | IFIT3 | 1 |
| hsa-miR-3663 NM_0010316   | IFIT3 | 1 |
| hsa-miR-3677 NM_0010316   | IFIT3 | 1 |
| hsa-miR-3907 NM_0010316   | IFIT3 | 1 |
| hsa-miR-3934 NM_0010316   | IFIT3 | 1 |
| hsa-miR-394C NM_0010316   | IFIT3 | 1 |
| hsa-miR-442C NM_0010316   | IFIT3 | 1 |



|                               |   |
|-------------------------------|---|
| hsa-miR-378g NM_0010316 IFIT3 | 1 |
| hsa-miR-4425 NM_0010316 IFIT3 | 1 |
| hsa-miR-4428 NM_0010316 IFIT3 | 1 |
| hsa-miR-443C NM_0010316 IFIT3 | 1 |
| hsa-miR-4433 NM_0010316 IFIT3 | 1 |
| hsa-miR-4441 NM_0010316 IFIT3 | 1 |
| hsa-miR-4448 NM_0010316 IFIT3 | 1 |
| hsa-miR-4466 NM_0010316 IFIT3 | 1 |
| hsa-miR-4474 NM_0010316 IFIT3 | 1 |
| hsa-miR-2392 NM_0010316 IFIT3 | 1 |
| hsa-miR-4525 NM_0010316 IFIT3 | 1 |
| hsa-miR-1587 NM_0010316 IFIT3 | 1 |
| hsa-miR-4537 NM_0010316 IFIT3 | 1 |
| hsa-miR-4632 NM_0010316 IFIT3 | 1 |
| hsa-miR-4633 NM_0010316 IFIT3 | 1 |
| hsa-miR-4638 NM_0010316 IFIT3 | 1 |
| hsa-miR-4665 NM_0010316 IFIT3 | 1 |
| hsa-miR-4673 NM_0010316 IFIT3 | 1 |
| hsa-miR-4697 NM_0010316 IFIT3 | 1 |
| hsa-miR-470C NM_0010316 IFIT3 | 1 |
| hsa-miR-4701 NM_0010316 IFIT3 | 1 |
| hsa-miR-4707 NM_0010316 IFIT3 | 1 |
| hsa-miR-4715 NM_0010316 IFIT3 | 1 |
| hsa-miR-4717 NM_0010316 IFIT3 | 1 |
| hsa-miR-4717 NM_0010316 IFIT3 | 1 |
| hsa-miR-4721 NM_0010316 IFIT3 | 1 |
| hsa-miR-4731 NM_0010316 IFIT3 | 1 |
| hsa-miR-4734 NM_0010316 IFIT3 | 1 |
| hsa-miR-4738 NM_0010316 IFIT3 | 1 |
| hsa-miR-475C NM_0010316 IFIT3 | 1 |
| hsa-miR-4753 NM_0010316 IFIT3 | 1 |
| hsa-miR-4761 NM_0010316 IFIT3 | 1 |
| hsa-miR-4767 NM_0010316 IFIT3 | 1 |
| hsa-miR-4436 NM_0010316 IFIT3 | 1 |
| hsa-miR-4783 NM_0010316 IFIT3 | 1 |
| hsa-miR-5001 NM_0010316 IFIT3 | 1 |
| hsa-miR-5002 NM_0010316 IFIT3 | 1 |
| hsa-miR-509C NM_0010316 IFIT3 | 1 |
| hsa-miR-5196 NM_0010316 IFIT3 | 1 |
| hsa-miR-5572 NM_0010316 IFIT3 | 1 |
| hsa-miR-5587 NM_0010316 IFIT3 | 1 |
| hsa-miR-569C NM_0010316 IFIT3 | 1 |
| hsa-miR-5704 NM_0010316 IFIT3 | 1 |
| hsa-miR-6085 NM_0010316 IFIT3 | 1 |
| hsa-miR-609C NM_0010316 IFIT3 | 1 |
| hsa-miR-6127 NM_0010316 IFIT3 | 1 |
| hsa-miR-6133 NM_0010316 IFIT3 | 1 |
| hsa-miR-6511 NM_0010316 IFIT3 | 1 |
| hsa-miR-6515 NM_0010316 IFIT3 | 1 |
| hsa-miR-6724 NM_0010316 IFIT3 | 1 |
| hsa-miR-892c NM_0010316 IFIT3 | 1 |
| hsa-miR-6726 NM_0010316 IFIT3 | 1 |
| hsa-miR-6728 NM_0010316 IFIT3 | 1 |
| hsa-miR-6732 NM_0010316 IFIT3 | 1 |
| hsa-miR-6732 NM_0010316 IFIT3 | 1 |
| hsa-miR-6742 NM_0010316 IFIT3 | 1 |
| hsa-miR-6743 NM_0010316 IFIT3 | 1 |
| hsa-miR-6747 NM_0010316 IFIT3 | 1 |
| hsa-miR-6749 NM_0010316 IFIT3 | 1 |
| hsa-miR-6752 NM_0010316 IFIT3 | 1 |
| hsa-miR-6754 NM_0010316 IFIT3 | 1 |
| hsa-miR-6762 NM_0010316 IFIT3 | 1 |
| hsa-miR-6764 NM_0010316 IFIT3 | 1 |
| hsa-miR-6765 NM_0010316 IFIT3 | 1 |
| hsa-miR-6769 NM_0010316 IFIT3 | 1 |
| hsa-miR-6772 NM_0010316 IFIT3 | 1 |
| hsa-miR-6772 NM_0010316 IFIT3 | 1 |
| hsa-miR-6774 NM_0010316 IFIT3 | 1 |
| hsa-miR-6776 NM_0010316 IFIT3 | 1 |
| hsa-miR-6777 NM_0010316 IFIT3 | 1 |
| hsa-miR-678C NM_0010316 IFIT3 | 1 |
| hsa-miR-6782 NM_0010316 IFIT3 | 1 |
| hsa-miR-6785 NM_0010316 IFIT3 | 1 |
| hsa-miR-6786 NM_0010316 IFIT3 | 1 |
| hsa-miR-6787 NM_0010316 IFIT3 | 1 |
| hsa-miR-679C NM_0010316 IFIT3 | 1 |
| hsa-miR-6791 NM_0010316 IFIT3 | 1 |
| hsa-miR-6792 NM_0010316 IFIT3 | 1 |
| hsa-miR-6799 NM_0010316 IFIT3 | 1 |
| hsa-miR-6813 NM_0010316 IFIT3 | 1 |
| hsa-miR-6817 NM_0010316 IFIT3 | 1 |
| hsa-miR-6819 NM_0010316 IFIT3 | 1 |
| hsa-miR-6821 NM_0010316 IFIT3 | 1 |
| hsa-miR-6823 NM_0010316 IFIT3 | 1 |
| hsa-miR-6823 NM_0010316 IFIT3 | 1 |
| hsa-miR-6824 NM_0010316 IFIT3 | 1 |
| hsa-miR-6828 NM_0010316 IFIT3 | 1 |
| hsa-miR-6831 NM_0010316 IFIT3 | 1 |
| hsa-miR-6833 NM_0010316 IFIT3 | 1 |
| hsa-miR-678C NM_0010316 IFIT3 | 1 |
| hsa-miR-6841 NM_0010316 IFIT3 | 1 |
| hsa-miR-6842 NM_0010316 IFIT3 | 1 |
| hsa-miR-6846 NM_0010316 IFIT3 | 1 |
| hsa-miR-6848 NM_0010316 IFIT3 | 1 |

|                                |            |
|--------------------------------|------------|
| hsa-miR-685C NM_0010316 IFIT3  | 1          |
| hsa-miR-686C NM_0010316 IFIT3  | 1          |
| hsa-miR-687S NM_0010316 IFIT3  | 1          |
| hsa-miR-688C NM_0010316 IFIT3  | 1          |
| hsa-miR-6886 NM_0010316 IFIT3  | 1          |
| hsa-miR-6891 NM_0010316 IFIT3  | 1          |
| hsa-miR-6893 NM_0010316 IFIT3  | 1          |
| hsa-miR-7107 NM_0010316 IFIT3  | 1          |
| hsa-miR-7107 NM_0010316 IFIT3  | 1          |
| hsa-miR-7108 NM_0010316 IFIT3  | 1          |
| hsa-miR-715C NM_0010316 IFIT3  | 1          |
| hsa-miR-7848 NM_0010316 IFIT3  | 1          |
| hsa-miR-1022 NM_0010316 IFIT3  | 1          |
| hsa-miR-1118 NM_0010316 IFIT3  | 1          |
| hsa-miR-9851 NM_0010316 IFIT3  | 1          |
| hsa-miR-1211 NM_0010316 IFIT3  | 1          |
| hsa-miR-4262 NM_0012670 RIBC1  | 0.96153846 |
| hsa-miR-573S NM_0012670 RIBC1  | 0.96153846 |
| hsa-miR-6812 NM_0012670 RIBC1  | 0.96153846 |
| hsa-miR-210- NM_144968 RIBC1   | 0.96153846 |
| hsa-miR-646 NM_144968 RIBC1    | 0.96153846 |
| hsa-miR-118C NM_144968 RIBC1   | 0.96153846 |
| hsa-miR-378c NM_144968 RIBC1   | 0.96153846 |
| hsa-miR-365S NM_144968 RIBC1   | 0.96153846 |
| hsa-miR-449S NM_144968 RIBC1   | 0.96153846 |
| hsa-miR-468S NM_144968 RIBC1   | 0.96153846 |
| hsa-miR-4721 NM_144968 RIBC1   | 0.96153846 |
| hsa-miR-4773 NM_144968 RIBC1   | 0.96153846 |
| hsa-miR-5092 NM_144968 RIBC1   | 0.96153846 |
| hsa-miR-5197 NM_144968 RIBC1   | 0.96153846 |
| hsa-miR-5787 NM_144968 RIBC1   | 0.96153846 |
| hsa-miR-6834 NM_144968 RIBC1   | 0.96153846 |
| hsa-miR-1211 NM_144968 RIBC1   | 0.96153846 |
| hsa-miR-4262 NM_0010317 RIBC1  | 0.96153846 |
| hsa-miR-103S NM_0012670 RIBC1  | 0.96923077 |
| hsa-miR-654- NM_144968 RIBC1   | 0.96923077 |
| hsa-miR-6511 NM_0012670 RIBC1  | 0.97435897 |
| hsa-miR-573S NM_144968 RIBC1   | 0.97435897 |
| hsa-miR-6746 NM_144968 RIBC1   | 0.97435897 |
| hsa-miR-1203 NM_144968 RIBC1   | 0.97435897 |
| hsa-miR-6833 NM_0012670 RIBC1  | 0.98076923 |
| hsa-miR-7847 NM_0012670 RIBC1  | 0.98076923 |
| hsa-miR-150- NM_144968 RIBC1   | 0.98076923 |
| hsa-miR-4726 NM_144968 RIBC1   | 0.98076923 |
| hsa-miR-6717 NM_144968 RIBC1   | 0.98076923 |
| hsa-miR-7112 NM_144968 RIBC1   | 0.98076923 |
| hsa-miR-7702 NM_144968 RIBC1   | 0.98076923 |
| hsa-miR-6823 NM_0012670 RIBC1  | 0.98717949 |
| hsa-miR-103S NM_0012670 RIBC1  | 0.98717949 |
| hsa-miR-892a NM_144968 RIBC1   | 0.99145299 |
| hsa-let-7a-5p NM_0012670 RIBC1 | 1          |
| hsa-let-7b-5p NM_0012670 RIBC1 | 1          |
| hsa-let-7b-5p NM_0012670 RIBC1 | 1          |
| hsa-let-7c-5p NM_0012670 RIBC1 | 1          |
| hsa-let-7c-5p NM_0012670 RIBC1 | 1          |
| hsa-miR-26b- NM_0012670 RIBC1  | 1          |
| hsa-miR-197- NM_0012670 RIBC1  | 1          |
| hsa-miR-197- NM_0012670 RIBC1  | 1          |
| hsa-miR-211- NM_0012670 RIBC1  | 1          |
| hsa-miR-30b- NM_0012670 RIBC1  | 1          |
| hsa-miR-122- NM_0012670 RIBC1  | 1          |
| hsa-miR-138- NM_0012670 RIBC1  | 1          |
| hsa-miR-150- NM_0012670 RIBC1  | 1          |
| hsa-miR-185- NM_0012670 RIBC1  | 1          |
| hsa-miR-130t NM_0012670 RIBC1  | 1          |
| hsa-miR-338- NM_0012670 RIBC1  | 1          |
| hsa-miR-335- NM_0012670 RIBC1  | 1          |
| hsa-miR-335- NM_0012670 RIBC1  | 1          |
| hsa-miR-345- NM_0012670 RIBC1  | 1          |
| hsa-miR-423- NM_0012670 RIBC1  | 1          |
| hsa-miR-483- NM_0012670 RIBC1  | 1          |
| hsa-miR-485- NM_0012670 RIBC1  | 1          |
| hsa-miR-500a NM_0012670 RIBC1  | 1          |
| hsa-miR-550a NM_0012670 RIBC1  | 1          |
| hsa-miR-623 NM_0012670 RIBC1   | 1          |
| hsa-miR-652- NM_0012670 RIBC1  | 1          |
| hsa-miR-656- NM_0012670 RIBC1  | 1          |
| hsa-miR-550a NM_0012670 RIBC1  | 1          |
| hsa-miR-1224 NM_0012670 RIBC1  | 1          |
| hsa-miR-320c NM_0012670 RIBC1  | 1          |
| hsa-miR-449c NM_0012670 RIBC1  | 1          |
| hsa-miR-765 NM_0012670 RIBC1   | 1          |
| hsa-miR-708- NM_0012670 RIBC1  | 1          |
| hsa-miR-877- NM_0012670 RIBC1  | 1          |
| hsa-miR-374t NM_0012670 RIBC1  | 1          |
| hsa-miR-935 NM_0012670 RIBC1   | 1          |
| hsa-miR-1178 NM_0012670 RIBC1  | 1          |
| hsa-miR-1227 NM_0012670 RIBC1  | 1          |
| hsa-miR-122S NM_0012670 RIBC1  | 1          |
| hsa-miR-1238 NM_0012670 RIBC1  | 1          |
| hsa-miR-1275 NM_0012670 RIBC1  | 1          |
| hsa-miR-1281 NM_0012670 RIBC1  | 1          |
| hsa-miR-1322 NM_0012670 RIBC1  | 1          |
| hsa-miR-182S NM_0012670 RIBC1  | 1          |

|                               |   |
|-------------------------------|---|
| hsa-miR-1913 NM_0012670 RIBC1 | 1 |
| hsa-miR-1976 NM_0012670 RIBC1 | 1 |
| hsa-miR-2114 NM_0012670 RIBC1 | 1 |
| hsa-miR-2116 NM_0012670 RIBC1 | 1 |
| hsa-miR-548c NM_0012670 RIBC1 | 1 |
| hsa-miR-711 NM_0012670 RIBC1  | 1 |
| hsa-miR-3127 NM_0012670 RIBC1 | 1 |
| hsa-miR-3129 NM_0012670 RIBC1 | 1 |
| hsa-miR-3130 NM_0012670 RIBC1 | 1 |
| hsa-miR-313C NM_0012670 RIBC1 | 1 |
| hsa-miR-378b NM_0012670 RIBC1 | 1 |
| hsa-miR-3141 NM_0012670 RIBC1 | 1 |
| hsa-miR-3154 NM_0012670 RIBC1 | 1 |
| hsa-miR-3154 NM_0012670 RIBC1 | 1 |
| hsa-miR-3162 NM_0012670 RIBC1 | 1 |
| hsa-miR-126C NM_0012670 RIBC1 | 1 |
| hsa-miR-3173 NM_0012670 RIBC1 | 1 |
| hsa-miR-319C NM_0012670 RIBC1 | 1 |
| hsa-miR-3192 NM_0012670 RIBC1 | 1 |
| hsa-miR-4299 NM_0012670 RIBC1 | 1 |
| hsa-miR-4257 NM_0012670 RIBC1 | 1 |
| hsa-miR-4258 NM_0012670 RIBC1 | 1 |
| hsa-miR-4326 NM_0012670 RIBC1 | 1 |
| hsa-miR-4327 NM_0012670 RIBC1 | 1 |
| hsa-miR-4271 NM_0012670 RIBC1 | 1 |
| hsa-miR-4274 NM_0012670 RIBC1 | 1 |
| hsa-miR-3654 NM_0012670 RIBC1 | 1 |
| hsa-miR-3663 NM_0012670 RIBC1 | 1 |
| hsa-miR-3667 NM_0012670 RIBC1 | 1 |
| hsa-miR-3679 NM_0012670 RIBC1 | 1 |
| hsa-miR-3689 NM_0012670 RIBC1 | 1 |
| hsa-miR-3689 NM_0012670 RIBC1 | 1 |
| hsa-miR-3689 NM_0012670 RIBC1 | 1 |
| hsa-miR-392C NM_0012670 RIBC1 | 1 |
| hsa-miR-374c NM_0012670 RIBC1 | 1 |
| hsa-miR-442C NM_0012670 RIBC1 | 1 |
| hsa-miR-4421 NM_0012670 RIBC1 | 1 |
| hsa-miR-378h NM_0012670 RIBC1 | 1 |
| hsa-miR-3689 NM_0012670 RIBC1 | 1 |
| hsa-miR-3689 NM_0012670 RIBC1 | 1 |
| hsa-miR-4482 NM_0012670 RIBC1 | 1 |
| hsa-miR-4502 NM_0012670 RIBC1 | 1 |
| hsa-miR-2392 NM_0012670 RIBC1 | 1 |
| hsa-miR-4523 NM_0012670 RIBC1 | 1 |
| hsa-miR-4534 NM_0012670 RIBC1 | 1 |
| hsa-miR-1587 NM_0012670 RIBC1 | 1 |
| hsa-miR-454C NM_0012670 RIBC1 | 1 |
| hsa-miR-4638 NM_0012670 RIBC1 | 1 |
| hsa-miR-4639 NM_0012670 RIBC1 | 1 |
| hsa-miR-4646 NM_0012670 RIBC1 | 1 |
| hsa-miR-4646 NM_0012670 RIBC1 | 1 |
| hsa-miR-4649 NM_0012670 RIBC1 | 1 |
| hsa-miR-4653 NM_0012670 RIBC1 | 1 |
| hsa-miR-4657 NM_0012670 RIBC1 | 1 |
| hsa-miR-4658 NM_0012670 RIBC1 | 1 |
| hsa-miR-4667 NM_0012670 RIBC1 | 1 |
| hsa-miR-4669 NM_0012670 RIBC1 | 1 |
| hsa-miR-4685 NM_0012670 RIBC1 | 1 |
| hsa-miR-4687 NM_0012670 RIBC1 | 1 |
| hsa-miR-4695 NM_0012670 RIBC1 | 1 |
| hsa-miR-4699 NM_0012670 RIBC1 | 1 |
| hsa-miR-4728 NM_0012670 RIBC1 | 1 |
| hsa-miR-3064 NM_0012670 RIBC1 | 1 |
| hsa-miR-4739 NM_0012670 RIBC1 | 1 |
| hsa-miR-4741 NM_0012670 RIBC1 | 1 |
| hsa-miR-4742 NM_0012670 RIBC1 | 1 |
| hsa-miR-4743 NM_0012670 RIBC1 | 1 |
| hsa-miR-475C NM_0012670 RIBC1 | 1 |
| hsa-miR-4754 NM_0012670 RIBC1 | 1 |
| hsa-miR-4757 NM_0012670 RIBC1 | 1 |
| hsa-miR-4764 NM_0012670 RIBC1 | 1 |
| hsa-miR-4776 NM_0012670 RIBC1 | 1 |
| hsa-miR-4778 NM_0012670 RIBC1 | 1 |
| hsa-miR-4784 NM_0012670 RIBC1 | 1 |
| hsa-miR-500C NM_0012670 RIBC1 | 1 |
| hsa-miR-5006 NM_0012670 RIBC1 | 1 |
| hsa-miR-5196 NM_0012670 RIBC1 | 1 |
| hsa-miR-664b NM_0012670 RIBC1 | 1 |
| hsa-miR-5698 NM_0012670 RIBC1 | 1 |
| hsa-miR-5699 NM_0012670 RIBC1 | 1 |
| hsa-miR-6076 NM_0012670 RIBC1 | 1 |
| hsa-miR-6086 NM_0012670 RIBC1 | 1 |
| hsa-miR-6124 NM_0012670 RIBC1 | 1 |
| hsa-miR-6165 NM_0012670 RIBC1 | 1 |
| hsa-miR-6506 NM_0012670 RIBC1 | 1 |
| hsa-miR-651C NM_0012670 RIBC1 | 1 |
| hsa-miR-6511 NM_0012670 RIBC1 | 1 |
| hsa-miR-6514 NM_0012670 RIBC1 | 1 |
| hsa-miR-6514 NM_0012670 RIBC1 | 1 |
| hsa-miR-6515 NM_0012670 RIBC1 | 1 |
| hsa-miR-6715 NM_0012670 RIBC1 | 1 |
| hsa-miR-6511 NM_0012670 RIBC1 | 1 |
| hsa-miR-6727 NM_0012670 RIBC1 | 1 |
| hsa-miR-6728 NM_0012670 RIBC1 | 1 |
| hsa-miR-673C NM_0012670 RIBC1 | 1 |



|              |           |       |   |
|--------------|-----------|-------|---|
| hsa-miR-204- | NM_144968 | RIBC1 | 1 |
| hsa-miR-211- | NM_144968 | RIBC1 | 1 |
| hsa-miR-212- | NM_144968 | RIBC1 | 1 |
| hsa-miR-214- | NM_144968 | RIBC1 | 1 |
| hsa-miR-214- | NM_144968 | RIBC1 | 1 |
| hsa-miR-221- | NM_144968 | RIBC1 | 1 |
| hsa-miR-222- | NM_144968 | RIBC1 | 1 |
| hsa-miR-128- | NM_144968 | RIBC1 | 1 |
| hsa-miR-133a | NM_144968 | RIBC1 | 1 |
| hsa-miR-135a | NM_144968 | RIBC1 | 1 |
| hsa-miR-137- | NM_144968 | RIBC1 | 1 |
| hsa-miR-137- | NM_144968 | RIBC1 | 1 |
| hsa-miR-152- | NM_144968 | RIBC1 | 1 |
| hsa-miR-127- | NM_144968 | RIBC1 | 1 |
| hsa-miR-127- | NM_144968 | RIBC1 | 1 |
| hsa-miR-134- | NM_144968 | RIBC1 | 1 |
| hsa-miR-146a | NM_144968 | RIBC1 | 1 |
| hsa-miR-188- | NM_144968 | RIBC1 | 1 |
| hsa-miR-320a | NM_144968 | RIBC1 | 1 |
| hsa-miR-155- | NM_144968 | RIBC1 | 1 |
| hsa-miR-302a | NM_144968 | RIBC1 | 1 |
| hsa-miR-130b | NM_144968 | RIBC1 | 1 |
| hsa-miR-302c | NM_144968 | RIBC1 | 1 |
| hsa-miR-302d | NM_144968 | RIBC1 | 1 |
| hsa-miR-373- | NM_144968 | RIBC1 | 1 |
| hsa-miR-379- | NM_144968 | RIBC1 | 1 |
| hsa-miR-330- | NM_144968 | RIBC1 | 1 |
| hsa-miR-337- | NM_144968 | RIBC1 | 1 |
| hsa-miR-323a | NM_144968 | RIBC1 | 1 |
| hsa-miR-135b | NM_144968 | RIBC1 | 1 |
| hsa-miR-331- | NM_144968 | RIBC1 | 1 |
| hsa-miR-339- | NM_144968 | RIBC1 | 1 |
| hsa-miR-133b | NM_144968 | RIBC1 | 1 |
| hsa-miR-325  | NM_144968 | RIBC1 | 1 |
| hsa-miR-346  | NM_144968 | RIBC1 | 1 |
| hsa-miR-20b- | NM_144968 | RIBC1 | 1 |
| hsa-miR-449a | NM_144968 | RIBC1 | 1 |
| hsa-miR-433- | NM_144968 | RIBC1 | 1 |
| hsa-miR-452- | NM_144968 | RIBC1 | 1 |
| hsa-miR-412- | NM_144968 | RIBC1 | 1 |
| hsa-miR-483- | NM_144968 | RIBC1 | 1 |
| hsa-miR-490- | NM_144968 | RIBC1 | 1 |
| hsa-miR-146b | NM_144968 | RIBC1 | 1 |
| hsa-miR-202- | NM_144968 | RIBC1 | 1 |
| hsa-miR-492  | NM_144968 | RIBC1 | 1 |
| hsa-miR-432- | NM_144968 | RIBC1 | 1 |
| hsa-miR-193b | NM_144968 | RIBC1 | 1 |
| hsa-miR-515- | NM_144968 | RIBC1 | 1 |
| hsa-miR-526a | NM_144968 | RIBC1 | 1 |
| hsa-miR-450a | NM_144968 | RIBC1 | 1 |
| hsa-miR-504- | NM_144968 | RIBC1 | 1 |
| hsa-miR-504- | NM_144968 | RIBC1 | 1 |
| hsa-miR-505- | NM_144968 | RIBC1 | 1 |
| hsa-miR-508- | NM_144968 | RIBC1 | 1 |
| hsa-miR-92b- | NM_144968 | RIBC1 | 1 |
| hsa-miR-92b- | NM_144968 | RIBC1 | 1 |
| hsa-miR-555  | NM_144968 | RIBC1 | 1 |
| hsa-miR-557  | NM_144968 | RIBC1 | 1 |
| hsa-miR-558  | NM_144968 | RIBC1 | 1 |
| hsa-miR-574- | NM_144968 | RIBC1 | 1 |
| hsa-miR-583  | NM_144968 | RIBC1 | 1 |
| hsa-miR-612  | NM_144968 | RIBC1 | 1 |
| hsa-miR-615- | NM_144968 | RIBC1 | 1 |
| hsa-miR-621  | NM_144968 | RIBC1 | 1 |
| hsa-miR-628- | NM_144968 | RIBC1 | 1 |
| hsa-miR-631  | NM_144968 | RIBC1 | 1 |
| hsa-miR-637  | NM_144968 | RIBC1 | 1 |
| hsa-miR-638  | NM_144968 | RIBC1 | 1 |
| hsa-miR-663a | NM_144968 | RIBC1 | 1 |
| hsa-miR-449b | NM_144968 | RIBC1 | 1 |
| hsa-miR-449b | NM_144968 | RIBC1 | 1 |
| hsa-miR-654- | NM_144968 | RIBC1 | 1 |
| hsa-miR-658  | NM_144968 | RIBC1 | 1 |
| hsa-miR-671- | NM_144968 | RIBC1 | 1 |
| hsa-miR-767- | NM_144968 | RIBC1 | 1 |
| hsa-miR-320b | NM_144968 | RIBC1 | 1 |
| hsa-miR-320c | NM_144968 | RIBC1 | 1 |
| hsa-miR-320c | NM_144968 | RIBC1 | 1 |
| hsa-miR-1468 | NM_144968 | RIBC1 | 1 |
| hsa-miR-766- | NM_144968 | RIBC1 | 1 |
| hsa-miR-765  | NM_144968 | RIBC1 | 1 |
| hsa-miR-765  | NM_144968 | RIBC1 | 1 |
| hsa-miR-744- | NM_144968 | RIBC1 | 1 |
| hsa-miR-920  | NM_144968 | RIBC1 | 1 |
| hsa-miR-921  | NM_144968 | RIBC1 | 1 |
| hsa-miR-933  | NM_144968 | RIBC1 | 1 |
| hsa-miR-1182 | NM_144968 | RIBC1 | 1 |
| hsa-miR-1225 | NM_144968 | RIBC1 | 1 |
| hsa-miR-1226 | NM_144968 | RIBC1 | 1 |
| hsa-miR-1226 | NM_144968 | RIBC1 | 1 |
| hsa-miR-1228 | NM_144968 | RIBC1 | 1 |
| hsa-miR-1228 | NM_144968 | RIBC1 | 1 |
| hsa-miR-1229 | NM_144968 | RIBC1 | 1 |
| hsa-miR-1231 | NM_144968 | RIBC1 | 1 |

|                        |       |   |
|------------------------|-------|---|
| hsa-miR-1233 NM_144968 | RIBC1 | 1 |
| hsa-miR-1238 NM_144968 | RIBC1 | 1 |
| hsa-miR-1202 NM_144968 | RIBC1 | 1 |
| hsa-miR-1207 NM_144968 | RIBC1 | 1 |
| hsa-miR-1293 NM_144968 | RIBC1 | 1 |
| hsa-miR-1295 NM_144968 | RIBC1 | 1 |
| hsa-miR-1295 NM_144968 | RIBC1 | 1 |
| hsa-miR-1299 NM_144968 | RIBC1 | 1 |
| hsa-miR-1245 NM_144968 | RIBC1 | 1 |
| hsa-miR-125C NM_144968 | RIBC1 | 1 |
| hsa-miR-1261 NM_144968 | RIBC1 | 1 |
| hsa-miR-1263 NM_144968 | RIBC1 | 1 |
| hsa-miR-1266 NM_144968 | RIBC1 | 1 |
| hsa-miR-1268 NM_144968 | RIBC1 | 1 |
| hsa-miR-1284 NM_144968 | RIBC1 | 1 |
| hsa-miR-1255 NM_144968 | RIBC1 | 1 |
| hsa-miR-1255 NM_144968 | RIBC1 | 1 |
| hsa-miR-1306 NM_144968 | RIBC1 | 1 |
| hsa-miR-1321 NM_144968 | RIBC1 | 1 |
| hsa-miR-1538 NM_144968 | RIBC1 | 1 |
| hsa-miR-1908 NM_144968 | RIBC1 | 1 |
| hsa-miR-1976 NM_144968 | RIBC1 | 1 |
| hsa-miR-2114 NM_144968 | RIBC1 | 1 |
| hsa-miR-2115 NM_144968 | RIBC1 | 1 |
| hsa-miR-2116 NM_144968 | RIBC1 | 1 |
| hsa-miR-548c NM_144968 | RIBC1 | 1 |
| hsa-miR-548c NM_144968 | RIBC1 | 1 |
| hsa-miR-711 NM_144968  | RIBC1 | 1 |
| hsa-miR-312C NM_144968 | RIBC1 | 1 |
| hsa-miR-3127 NM_144968 | RIBC1 | 1 |
| hsa-miR-3128 NM_144968 | RIBC1 | 1 |
| hsa-miR-313C NM_144968 | RIBC1 | 1 |
| hsa-miR-3138 NM_144968 | RIBC1 | 1 |
| hsa-miR-3141 NM_144968 | RIBC1 | 1 |
| hsa-miR-3147 NM_144968 | RIBC1 | 1 |
| hsa-miR-315C NM_144968 | RIBC1 | 1 |
| hsa-miR-3151 NM_144968 | RIBC1 | 1 |
| hsa-miR-3153 NM_144968 | RIBC1 | 1 |
| hsa-miR-3154 NM_144968 | RIBC1 | 1 |
| hsa-miR-3162 NM_144968 | RIBC1 | 1 |
| hsa-miR-3165 NM_144968 | RIBC1 | 1 |
| hsa-miR-3175 NM_144968 | RIBC1 | 1 |
| hsa-miR-3188 NM_144968 | RIBC1 | 1 |
| hsa-miR-3192 NM_144968 | RIBC1 | 1 |
| hsa-miR-3194 NM_144968 | RIBC1 | 1 |
| hsa-miR-3197 NM_144968 | RIBC1 | 1 |
| hsa-miR-514b NM_144968 | RIBC1 | 1 |
| hsa-miR-3202 NM_144968 | RIBC1 | 1 |
| hsa-miR-4298 NM_144968 | RIBC1 | 1 |
| hsa-miR-4315 NM_144968 | RIBC1 | 1 |
| hsa-miR-4324 NM_144968 | RIBC1 | 1 |
| hsa-miR-4259 NM_144968 | RIBC1 | 1 |
| hsa-miR-4253 NM_144968 | RIBC1 | 1 |
| hsa-miR-2355 NM_144968 | RIBC1 | 1 |
| hsa-miR-427C NM_144968 | RIBC1 | 1 |
| hsa-miR-4273 NM_144968 | RIBC1 | 1 |
| hsa-miR-4281 NM_144968 | RIBC1 | 1 |
| hsa-miR-4285 NM_144968 | RIBC1 | 1 |
| hsa-miR-4325 NM_144968 | RIBC1 | 1 |
| hsa-miR-3605 NM_144968 | RIBC1 | 1 |
| hsa-miR-3622 NM_144968 | RIBC1 | 1 |
| hsa-miR-3622 NM_144968 | RIBC1 | 1 |
| hsa-miR-3648 NM_144968 | RIBC1 | 1 |
| hsa-miR-3652 NM_144968 | RIBC1 | 1 |
| hsa-miR-3661 NM_144968 | RIBC1 | 1 |
| hsa-miR-3665 NM_144968 | RIBC1 | 1 |
| hsa-miR-3675 NM_144968 | RIBC1 | 1 |
| hsa-miR-3677 NM_144968 | RIBC1 | 1 |
| hsa-miR-3679 NM_144968 | RIBC1 | 1 |
| hsa-miR-3679 NM_144968 | RIBC1 | 1 |
| hsa-miR-3685 NM_144968 | RIBC1 | 1 |
| hsa-miR-3685 NM_144968 | RIBC1 | 1 |
| hsa-miR-3713 NM_144968 | RIBC1 | 1 |
| hsa-miR-318C NM_144968 | RIBC1 | 1 |
| hsa-miR-3907 NM_144968 | RIBC1 | 1 |
| hsa-miR-3908 NM_144968 | RIBC1 | 1 |
| hsa-miR-3917 NM_144968 | RIBC1 | 1 |
| hsa-miR-315C NM_144968 | RIBC1 | 1 |
| hsa-miR-315C NM_144968 | RIBC1 | 1 |
| hsa-miR-3937 NM_144968 | RIBC1 | 1 |
| hsa-miR-3937 NM_144968 | RIBC1 | 1 |
| hsa-miR-3943 NM_144968 | RIBC1 | 1 |
| hsa-miR-3944 NM_144968 | RIBC1 | 1 |
| hsa-miR-1268 NM_144968 | RIBC1 | 1 |
| hsa-miR-378e NM_144968 | RIBC1 | 1 |
| hsa-miR-4425 NM_144968 | RIBC1 | 1 |
| hsa-miR-443C NM_144968 | RIBC1 | 1 |
| hsa-miR-443C NM_144968 | RIBC1 | 1 |
| hsa-miR-4433 NM_144968 | RIBC1 | 1 |
| hsa-miR-444C NM_144968 | RIBC1 | 1 |
| hsa-miR-4441 NM_144968 | RIBC1 | 1 |
| hsa-miR-4446 NM_144968 | RIBC1 | 1 |
| hsa-miR-4446 NM_144968 | RIBC1 | 1 |
| hsa-miR-4448 NM_144968 | RIBC1 | 1 |
| hsa-miR-4448 NM_144968 | RIBC1 | 1 |







|                         |       |   |
|-------------------------|-------|---|
| hsa-miR-6825 NM_144968  | RIBC1 | 1 |
| hsa-miR-6825 NM_144968  | RIBC1 | 1 |
| hsa-miR-6825 NM_144968  | RIBC1 | 1 |
| hsa-miR-6827 NM_144968  | RIBC1 | 1 |
| hsa-miR-6829 NM_144968  | RIBC1 | 1 |
| hsa-miR-6831 NM_144968  | RIBC1 | 1 |
| hsa-miR-6833 NM_144968  | RIBC1 | 1 |
| hsa-miR-6833 NM_144968  | RIBC1 | 1 |
| hsa-miR-678C NM_144968  | RIBC1 | 1 |
| hsa-miR-6845 NM_144968  | RIBC1 | 1 |
| hsa-miR-6846 NM_144968  | RIBC1 | 1 |
| hsa-miR-6848 NM_144968  | RIBC1 | 1 |
| hsa-miR-6848 NM_144968  | RIBC1 | 1 |
| hsa-miR-6849 NM_144968  | RIBC1 | 1 |
| hsa-miR-6856 NM_144968  | RIBC1 | 1 |
| hsa-miR-6857 NM_144968  | RIBC1 | 1 |
| hsa-miR-6858 NM_144968  | RIBC1 | 1 |
| hsa-miR-6858 NM_144968  | RIBC1 | 1 |
| hsa-miR-6859 NM_144968  | RIBC1 | 1 |
| hsa-miR-676S NM_144968  | RIBC1 | 1 |
| hsa-miR-6861 NM_144968  | RIBC1 | 1 |
| hsa-miR-6861 NM_144968  | RIBC1 | 1 |
| hsa-miR-6862 NM_144968  | RIBC1 | 1 |
| hsa-miR-6862 NM_144968  | RIBC1 | 1 |
| hsa-miR-687C NM_144968  | RIBC1 | 1 |
| hsa-miR-687C NM_144968  | RIBC1 | 1 |
| hsa-miR-6871 NM_144968  | RIBC1 | 1 |
| hsa-miR-6874 NM_144968  | RIBC1 | 1 |
| hsa-miR-6875 NM_144968  | RIBC1 | 1 |
| hsa-miR-688C NM_144968  | RIBC1 | 1 |
| hsa-miR-6882 NM_144968  | RIBC1 | 1 |
| hsa-miR-6883 NM_144968  | RIBC1 | 1 |
| hsa-miR-6883 NM_144968  | RIBC1 | 1 |
| hsa-miR-6886 NM_144968  | RIBC1 | 1 |
| hsa-miR-6887 NM_144968  | RIBC1 | 1 |
| hsa-miR-6889 NM_144968  | RIBC1 | 1 |
| hsa-miR-689C NM_144968  | RIBC1 | 1 |
| hsa-miR-6891 NM_144968  | RIBC1 | 1 |
| hsa-miR-6891 NM_144968  | RIBC1 | 1 |
| hsa-miR-6893 NM_144968  | RIBC1 | 1 |
| hsa-miR-6893 NM_144968  | RIBC1 | 1 |
| hsa-miR-710S NM_144968  | RIBC1 | 1 |
| hsa-miR-711C NM_144968  | RIBC1 | 1 |
| hsa-miR-711C NM_144968  | RIBC1 | 1 |
| hsa-miR-711C NM_144968  | RIBC1 | 1 |
| hsa-miR-7111 NM_144968  | RIBC1 | 1 |
| hsa-miR-7113 NM_144968  | RIBC1 | 1 |
| hsa-miR-7113 NM_144968  | RIBC1 | 1 |
| hsa-miR-7114 NM_144968  | RIBC1 | 1 |
| hsa-miR-715C NM_144968  | RIBC1 | 1 |
| hsa-miR-715C NM_144968  | RIBC1 | 1 |
| hsa-miR-7151 NM_144968  | RIBC1 | 1 |
| hsa-miR-716C NM_144968  | RIBC1 | 1 |
| hsa-miR-7515 NM_144968  | RIBC1 | 1 |
| hsa-miR-7704 NM_144968  | RIBC1 | 1 |
| hsa-miR-4433 NM_144968  | RIBC1 | 1 |
| hsa-miR-1273 NM_144968  | RIBC1 | 1 |
| hsa-miR-7846 NM_144968  | RIBC1 | 1 |
| hsa-miR-7847 NM_144968  | RIBC1 | 1 |
| hsa-miR-7847 NM_144968  | RIBC1 | 1 |
| hsa-miR-7854 NM_144968  | RIBC1 | 1 |
| hsa-miR-806S NM_144968  | RIBC1 | 1 |
| hsa-miR-8072 NM_144968  | RIBC1 | 1 |
| hsa-miR-8072 NM_144968  | RIBC1 | 1 |
| hsa-miR-8073 NM_144968  | RIBC1 | 1 |
| hsa-miR-8074 NM_144968  | RIBC1 | 1 |
| hsa-miR-8077 NM_144968  | RIBC1 | 1 |
| hsa-miR-808C NM_144968  | RIBC1 | 1 |
| hsa-miR-8085 NM_144968  | RIBC1 | 1 |
| hsa-miR-950C NM_144968  | RIBC1 | 1 |
| hsa-miR-9903 NM_144968  | RIBC1 | 1 |
| hsa-miR-1843 NM_144968  | RIBC1 | 1 |
| hsa-miR-103S NM_144968  | RIBC1 | 1 |
| hsa-miR-1118 NM_144968  | RIBC1 | 1 |
| hsa-miR-305S NM_144968  | RIBC1 | 1 |
| hsa-miR-3085 NM_144968  | RIBC1 | 1 |
| hsa-miR-9851 NM_144968  | RIBC1 | 1 |
| hsa-miR-1211 NM_144968  | RIBC1 | 1 |
| hsa-miR-1211 NM_144968  | RIBC1 | 1 |
| hsa-miR-1212 NM_144968  | RIBC1 | 1 |
| hsa-miR-1212 NM_144968  | RIBC1 | 1 |
| hsa-miR-27a- NM_0010317 | RIBC1 | 1 |
| hsa-miR-92a- NM_0010317 | RIBC1 | 1 |
| hsa-miR-197- NM_0010317 | RIBC1 | 1 |
| hsa-miR-30b- NM_0010317 | RIBC1 | 1 |
| hsa-miR-185- NM_0010317 | RIBC1 | 1 |
| hsa-miR-423- NM_0010317 | RIBC1 | 1 |
| hsa-miR-620 NM_0010317  | RIBC1 | 1 |
| hsa-miR-652- NM_0010317 | RIBC1 | 1 |
| hsa-miR-660- NM_0010317 | RIBC1 | 1 |
| hsa-miR-320c NM_0010317 | RIBC1 | 1 |
| hsa-miR-1275 NM_0010317 | RIBC1 | 1 |
| hsa-miR-3141 NM_0010317 | RIBC1 | 1 |
| hsa-miR-3154 NM_0010317 | RIBC1 | 1 |

|                                  |            |
|----------------------------------|------------|
| hsa-miR-4327 NM_0010317 RIBC1    | 1          |
| hsa-miR-3685 NM_0010317 RIBC1    | 1          |
| hsa-miR-4468 NM_0010317 RIBC1    | 1          |
| hsa-miR-3685 NM_0010317 RIBC1    | 1          |
| hsa-miR-4534 NM_0010317 RIBC1    | 1          |
| hsa-miR-4658 NM_0010317 RIBC1    | 1          |
| hsa-miR-4667 NM_0010317 RIBC1    | 1          |
| hsa-miR-4669 NM_0010317 RIBC1    | 1          |
| hsa-miR-4724 NM_0010317 RIBC1    | 1          |
| hsa-miR-4728 NM_0010317 RIBC1    | 1          |
| hsa-miR-4754 NM_0010317 RIBC1    | 1          |
| hsa-miR-5194 NM_0010317 RIBC1    | 1          |
| hsa-miR-5698 NM_0010317 RIBC1    | 1          |
| hsa-miR-6086 NM_0010317 RIBC1    | 1          |
| hsa-miR-6124 NM_0010317 RIBC1    | 1          |
| hsa-miR-6127 NM_0010317 RIBC1    | 1          |
| hsa-miR-6133 NM_0010317 RIBC1    | 1          |
| hsa-miR-6134 NM_0010317 RIBC1    | 1          |
| hsa-miR-6165 NM_0010317 RIBC1    | 1          |
| hsa-miR-6515 NM_0010317 RIBC1    | 1          |
| hsa-miR-673C NM_0010317 RIBC1    | 1          |
| hsa-miR-674C NM_0010317 RIBC1    | 1          |
| hsa-miR-6747 NM_0010317 RIBC1    | 1          |
| hsa-miR-6766 NM_0010317 RIBC1    | 1          |
| hsa-miR-6769 NM_0010317 RIBC1    | 1          |
| hsa-miR-6795 NM_0010317 RIBC1    | 1          |
| hsa-miR-6797 NM_0010317 RIBC1    | 1          |
| hsa-miR-6812 NM_0010317 RIBC1    | 1          |
| hsa-miR-6825 NM_0010317 RIBC1    | 1          |
| hsa-miR-6826 NM_0010317 RIBC1    | 1          |
| hsa-miR-6875 NM_0010317 RIBC1    | 1          |
| hsa-miR-6883 NM_0010317 RIBC1    | 1          |
| hsa-miR-7107 NM_0010317 RIBC1    | 1          |
| hsa-miR-711C NM_0010317 RIBC1    | 1          |
| hsa-miR-7162 NM_0010317 RIBC1    | 1          |
| hsa-miR-4433 NM_0010317 RIBC1    | 1          |
| hsa-miR-7846 NM_0010317 RIBC1    | 1          |
| hsa-miR-8082 NM_0010317 RIBC1    | 1          |
| hsa-miR-8085 NM_0010317 RIBC1    | 1          |
| hsa-miR-1211 NM_0010317 RIBC1    | 1          |
| hsa-miR-1211 NM_0010317 RIBC1    | 1          |
| hsa-miR-1022 NM_0012618 SERPINB7 | 0.95384615 |
| hsa-miR-1022 NM_0010401 SERPINB7 | 0.95384615 |
| hsa-miR-937- NM_0012618 SERPINB7 | 0.96153846 |
| hsa-miR-1275 NM_0012618 SERPINB7 | 0.96153846 |
| hsa-miR-4255 NM_0012618 SERPINB7 | 0.96153846 |
| hsa-miR-3976 NM_0012618 SERPINB7 | 0.96153846 |
| hsa-miR-7106 NM_0012618 SERPINB7 | 0.96153846 |
| hsa-miR-1275 NM_003784 SERPINB7  | 0.96153846 |
| hsa-miR-7106 NM_003784 SERPINB7  | 0.96153846 |
| hsa-miR-4255 NM_0010401 SERPINB7 | 0.96153846 |
| hsa-miR-676C NM_0010401 SERPINB7 | 0.96153846 |
| hsa-miR-7106 NM_0010401 SERPINB7 | 0.96153846 |
| hsa-miR-410- NM_0012618 SERPINB7 | 0.97435897 |
| hsa-miR-7111 NM_0012618 SERPINB7 | 0.97435897 |
| hsa-miR-410- NM_003784 SERPINB7  | 0.97435897 |
| hsa-miR-6086 NM_003784 SERPINB7  | 0.97435897 |
| hsa-miR-7111 NM_003784 SERPINB7  | 0.97435897 |
| hsa-miR-7111 NM_0010401 SERPINB7 | 0.97435897 |
| hsa-miR-4447 NM_0012618 SERPINB7 | 0.98076923 |
| hsa-miR-4447 NM_003784 SERPINB7  | 0.98076923 |
| hsa-miR-4447 NM_0010401 SERPINB7 | 0.98076923 |
| hsa-miR-23a- NM_0012618 SERPINB7 | 1          |
| hsa-miR-204- NM_0012618 SERPINB7 | 1          |
| hsa-miR-217- NM_0012618 SERPINB7 | 1          |
| hsa-miR-30c- NM_0012618 SERPINB7 | 1          |
| hsa-miR-99b- NM_0012618 SERPINB7 | 1          |
| hsa-miR-331- NM_0012618 SERPINB7 | 1          |
| hsa-miR-490- NM_0012618 SERPINB7 | 1          |
| hsa-miR-526b NM_0012618 SERPINB7 | 1          |
| hsa-miR-525- NM_0012618 SERPINB7 | 1          |
| hsa-miR-504- NM_0012618 SERPINB7 | 1          |
| hsa-miR-769- NM_0012618 SERPINB7 | 1          |
| hsa-miR-761 NM_0012618 SERPINB7  | 1          |
| hsa-miR-885- NM_0012618 SERPINB7 | 1          |
| hsa-miR-1182 NM_0012618 SERPINB7 | 1          |
| hsa-miR-1226 NM_0012618 SERPINB7 | 1          |
| hsa-miR-1208 NM_0012618 SERPINB7 | 1          |
| hsa-miR-1265 NM_0012618 SERPINB7 | 1          |
| hsa-miR-1268 NM_0012618 SERPINB7 | 1          |
| hsa-miR-1197 NM_0012618 SERPINB7 | 1          |
| hsa-miR-1914 NM_0012618 SERPINB7 | 1          |
| hsa-miR-3141 NM_0012618 SERPINB7 | 1          |
| hsa-miR-3151 NM_0012618 SERPINB7 | 1          |
| hsa-miR-3153 NM_0012618 SERPINB7 | 1          |
| hsa-miR-3173 NM_0012618 SERPINB7 | 1          |
| hsa-miR-3187 NM_0012618 SERPINB7 | 1          |
| hsa-miR-3195 NM_0012618 SERPINB7 | 1          |
| hsa-miR-4257 NM_0012618 SERPINB7 | 1          |
| hsa-miR-4327 NM_0012618 SERPINB7 | 1          |
| hsa-miR-427C NM_0012618 SERPINB7 | 1          |
| hsa-miR-4271 NM_0012618 SERPINB7 | 1          |
| hsa-miR-3714 NM_0012618 SERPINB7 | 1          |
| hsa-miR-3905 NM_0012618 SERPINB7 | 1          |

|                                   |   |
|-----------------------------------|---|
| hsa-miR-4482 NM_0012618 SERPINB7  | 1 |
| hsa-miR-4485 NM_0012618 SERPINB7  | 1 |
| hsa-miR-4533 NM_0012618 SERPINB7  | 1 |
| hsa-miR-3976 NM_0012618 SERPINB7  | 1 |
| hsa-miR-3978 NM_0012618 SERPINB7  | 1 |
| hsa-miR-4667 NM_0012618 SERPINB7  | 1 |
| hsa-miR-470C NM_0012618 SERPINB7  | 1 |
| hsa-miR-471C NM_0012618 SERPINB7  | 1 |
| hsa-miR-4723 NM_0012618 SERPINB7  | 1 |
| hsa-miR-4726 NM_0012618 SERPINB7  | 1 |
| hsa-miR-4732 NM_0012618 SERPINB7  | 1 |
| hsa-miR-480C NM_0012618 SERPINB7  | 1 |
| hsa-miR-5572 NM_0012618 SERPINB7  | 1 |
| hsa-miR-5685 NM_0012618 SERPINB7  | 1 |
| hsa-miR-6085 NM_0012618 SERPINB7  | 1 |
| hsa-miR-6086 NM_0012618 SERPINB7  | 1 |
| hsa-miR-609C NM_0012618 SERPINB7  | 1 |
| hsa-miR-6132 NM_0012618 SERPINB7  | 1 |
| hsa-miR-6134 NM_0012618 SERPINB7  | 1 |
| hsa-miR-6513 NM_0012618 SERPINB7  | 1 |
| hsa-miR-6731 NM_0012618 SERPINB7  | 1 |
| hsa-miR-6734 NM_0012618 SERPINB7  | 1 |
| hsa-miR-6743 NM_0012618 SERPINB7  | 1 |
| hsa-miR-6762 NM_0012618 SERPINB7  | 1 |
| hsa-miR-6763 NM_0012618 SERPINB7  | 1 |
| hsa-miR-6776 NM_0012618 SERPINB7  | 1 |
| hsa-miR-6779 NM_0012618 SERPINB7  | 1 |
| hsa-miR-6779 NM_0012618 SERPINB7  | 1 |
| hsa-miR-6795 NM_0012618 SERPINB7  | 1 |
| hsa-miR-6799 NM_0012618 SERPINB7  | 1 |
| hsa-miR-6803 NM_0012618 SERPINB7  | 1 |
| hsa-miR-6808 NM_0012618 SERPINB7  | 1 |
| hsa-miR-6812 NM_0012618 SERPINB7  | 1 |
| hsa-miR-6812 NM_0012618 SERPINB7  | 1 |
| hsa-miR-6821 NM_0012618 SERPINB7  | 1 |
| hsa-miR-6823 NM_0012618 SERPINB7  | 1 |
| hsa-miR-6825 NM_0012618 SERPINB7  | 1 |
| hsa-miR-6831 NM_0012618 SERPINB7  | 1 |
| hsa-miR-6838 NM_0012618 SERPINB7  | 1 |
| hsa-miR-6851 NM_0012618 SERPINB7  | 1 |
| hsa-miR-6853 NM_0012618 SERPINB7  | 1 |
| hsa-miR-6857 NM_0012618 SERPINB7  | 1 |
| hsa-miR-6862 NM_0012618 SERPINB7  | 1 |
| hsa-miR-6864 NM_0012618 SERPINB7  | 1 |
| hsa-miR-6876 NM_0012618 SERPINB7  | 1 |
| hsa-miR-6893 NM_0012618 SERPINB7  | 1 |
| hsa-miR-7111 NM_0012618 SERPINB7  | 1 |
| hsa-miR-7844 NM_0012618 SERPINB7  | 1 |
| hsa-miR-8082 NM_0012618 SERPINB7  | 1 |
| hsa-miR-1039 NM_0012618 SERPINB7  | 1 |
| hsa-miR-104C NM_0012618 SERPINB7  | 1 |
| hsa-miR-104C NM_0012618 SERPINB7  | 1 |
| hsa-miR-1118 NM_0012618 SERPINB7  | 1 |
| hsa-miR-23a-1 NM_0012618 SERPINB7 | 1 |
| hsa-miR-92a-1 NM_0012618 SERPINB7 | 1 |
| hsa-miR-197-1 NM_0012618 SERPINB7 | 1 |
| hsa-miR-203a NM_0012618 SERPINB7  | 1 |
| hsa-miR-204-1 NM_0012618 SERPINB7 | 1 |
| hsa-miR-217-1 NM_0012618 SERPINB7 | 1 |
| hsa-miR-152-1 NM_0012618 SERPINB7 | 1 |
| hsa-miR-194-1 NM_0012618 SERPINB7 | 1 |
| hsa-miR-376c NM_0012618 SERPINB7  | 1 |
| hsa-miR-518f NM_0012618 SERPINB7  | 1 |
| hsa-miR-504-1 NM_0012618 SERPINB7 | 1 |
| hsa-miR-583 NM_0012618 SERPINB7   | 1 |
| hsa-miR-648 NM_0012618 SERPINB7   | 1 |
| hsa-miR-652-1 NM_0012618 SERPINB7 | 1 |
| hsa-miR-769-1 NM_0012618 SERPINB7 | 1 |
| hsa-miR-761 NM_0012618 SERPINB7   | 1 |
| hsa-miR-1226 NM_0012618 SERPINB7  | 1 |
| hsa-miR-1268 NM_0012618 SERPINB7  | 1 |
| hsa-miR-1914 NM_0012618 SERPINB7  | 1 |
| hsa-miR-2117 NM_0012618 SERPINB7  | 1 |
| hsa-miR-2278 NM_0012618 SERPINB7  | 1 |
| hsa-miR-3121 NM_0012618 SERPINB7  | 1 |
| hsa-miR-3141 NM_0012618 SERPINB7  | 1 |
| hsa-miR-3151 NM_0012618 SERPINB7  | 1 |
| hsa-miR-3153 NM_0012618 SERPINB7  | 1 |
| hsa-miR-1193 NM_0012618 SERPINB7  | 1 |
| hsa-miR-3191 NM_0012618 SERPINB7  | 1 |
| hsa-miR-4259 NM_0012618 SERPINB7  | 1 |
| hsa-miR-4327 NM_0012618 SERPINB7  | 1 |
| hsa-miR-427C NM_0012618 SERPINB7  | 1 |
| hsa-miR-4271 NM_0012618 SERPINB7  | 1 |
| hsa-miR-3714 NM_0012618 SERPINB7  | 1 |
| hsa-miR-3936 NM_0012618 SERPINB7  | 1 |
| hsa-miR-4433 NM_0012618 SERPINB7  | 1 |
| hsa-miR-4447 NM_0012618 SERPINB7  | 1 |
| hsa-miR-4468 NM_0012618 SERPINB7  | 1 |
| hsa-miR-3689 NM_0012618 SERPINB7  | 1 |
| hsa-miR-4489 NM_0012618 SERPINB7  | 1 |
| hsa-miR-4529 NM_0012618 SERPINB7  | 1 |
| hsa-miR-4533 NM_0012618 SERPINB7  | 1 |
| hsa-miR-3978 NM_0012618 SERPINB7  | 1 |

|                                  |   |
|----------------------------------|---|
| hsa-miR-4648 NM_0012618 SERPINB7 | 1 |
| hsa-miR-4667 NM_0012618 SERPINB7 | 1 |
| hsa-miR-4669 NM_0012618 SERPINB7 | 1 |
| hsa-miR-4700 NM_0012618 SERPINB7 | 1 |
| hsa-miR-4700 NM_0012618 SERPINB7 | 1 |
| hsa-miR-4710 NM_0012618 SERPINB7 | 1 |
| hsa-miR-4723 NM_0012618 SERPINB7 | 1 |
| hsa-miR-4732 NM_0012618 SERPINB7 | 1 |
| hsa-miR-4743 NM_0012618 SERPINB7 | 1 |
| hsa-miR-4750 NM_0012618 SERPINB7 | 1 |
| hsa-miR-4750 NM_0012618 SERPINB7 | 1 |
| hsa-miR-4769 NM_0012618 SERPINB7 | 1 |
| hsa-miR-4769 NM_0012618 SERPINB7 | 1 |
| hsa-miR-5572 NM_0012618 SERPINB7 | 1 |
| hsa-miR-5685 NM_0012618 SERPINB7 | 1 |
| hsa-miR-6085 NM_0012618 SERPINB7 | 1 |
| hsa-miR-6086 NM_0012618 SERPINB7 | 1 |
| hsa-miR-6134 NM_0012618 SERPINB7 | 1 |
| hsa-miR-6513 NM_0012618 SERPINB7 | 1 |
| hsa-miR-6514 NM_0012618 SERPINB7 | 1 |
| hsa-miR-6717 NM_0012618 SERPINB7 | 1 |
| hsa-miR-6734 NM_0012618 SERPINB7 | 1 |
| hsa-miR-6741 NM_0012618 SERPINB7 | 1 |
| hsa-miR-6743 NM_0012618 SERPINB7 | 1 |
| hsa-miR-6750 NM_0012618 SERPINB7 | 1 |
| hsa-miR-6755 NM_0012618 SERPINB7 | 1 |
| hsa-miR-6756 NM_0012618 SERPINB7 | 1 |
| hsa-miR-6758 NM_0012618 SERPINB7 | 1 |
| hsa-miR-6762 NM_0012618 SERPINB7 | 1 |
| hsa-miR-6763 NM_0012618 SERPINB7 | 1 |
| hsa-miR-6776 NM_0012618 SERPINB7 | 1 |
| hsa-miR-6776 NM_0012618 SERPINB7 | 1 |
| hsa-miR-6779 NM_0012618 SERPINB7 | 1 |
| hsa-miR-6791 NM_0012618 SERPINB7 | 1 |
| hsa-miR-6793 NM_0012618 SERPINB7 | 1 |
| hsa-miR-6795 NM_0012618 SERPINB7 | 1 |
| hsa-miR-6803 NM_0012618 SERPINB7 | 1 |
| hsa-miR-6808 NM_0012618 SERPINB7 | 1 |
| hsa-miR-6812 NM_0012618 SERPINB7 | 1 |
| hsa-miR-6812 NM_0012618 SERPINB7 | 1 |
| hsa-miR-6821 NM_0012618 SERPINB7 | 1 |
| hsa-miR-6823 NM_0012618 SERPINB7 | 1 |
| hsa-miR-6825 NM_0012618 SERPINB7 | 1 |
| hsa-miR-6826 NM_0012618 SERPINB7 | 1 |
| hsa-miR-6831 NM_0012618 SERPINB7 | 1 |
| hsa-miR-6851 NM_0012618 SERPINB7 | 1 |
| hsa-miR-6864 NM_0012618 SERPINB7 | 1 |
| hsa-miR-6876 NM_0012618 SERPINB7 | 1 |
| hsa-miR-7111 NM_0012618 SERPINB7 | 1 |
| hsa-miR-7111 NM_0012618 SERPINB7 | 1 |
| hsa-miR-4433 NM_0012618 SERPINB7 | 1 |
| hsa-miR-8079 NM_0012618 SERPINB7 | 1 |
| hsa-miR-1040 NM_0012618 SERPINB7 | 1 |
| hsa-miR-23a- NM_003784 SERPINB7  | 1 |
| hsa-miR-28-5j NM_003784 SERPINB7 | 1 |
| hsa-miR-92a- NM_003784 SERPINB7  | 1 |
| hsa-miR-29b- NM_003784 SERPINB7  | 1 |
| hsa-miR-204- NM_003784 SERPINB7  | 1 |
| hsa-miR-217- NM_003784 SERPINB7  | 1 |
| hsa-miR-30c- NM_003784 SERPINB7  | 1 |
| hsa-miR-34b- NM_003784 SERPINB7  | 1 |
| hsa-miR-99b- NM_003784 SERPINB7  | 1 |
| hsa-miR-26a- NM_003784 SERPINB7  | 1 |
| hsa-miR-376c NM_003784 SERPINB7  | 1 |
| hsa-miR-490- NM_003784 SERPINB7  | 1 |
| hsa-miR-525- NM_003784 SERPINB7  | 1 |
| hsa-miR-518f NM_003784 SERPINB7  | 1 |
| hsa-miR-504- NM_003784 SERPINB7  | 1 |
| hsa-miR-583 NM_003784 SERPINB7   | 1 |
| hsa-miR-652- NM_003784 SERPINB7  | 1 |
| hsa-miR-769- NM_003784 SERPINB7  | 1 |
| hsa-miR-761 NM_003784 SERPINB7   | 1 |
| hsa-miR-885- NM_003784 SERPINB7  | 1 |
| hsa-miR-1182 NM_003784 SERPINB7  | 1 |
| hsa-miR-1226 NM_003784 SERPINB7  | 1 |
| hsa-miR-1268 NM_003784 SERPINB7  | 1 |
| hsa-miR-1288 NM_003784 SERPINB7  | 1 |
| hsa-miR-1914 NM_003784 SERPINB7  | 1 |
| hsa-miR-2117 NM_003784 SERPINB7  | 1 |
| hsa-miR-3141 NM_003784 SERPINB7  | 1 |
| hsa-miR-3151 NM_003784 SERPINB7  | 1 |
| hsa-miR-3153 NM_003784 SERPINB7  | 1 |
| hsa-miR-3173 NM_003784 SERPINB7  | 1 |
| hsa-miR-3187 NM_003784 SERPINB7  | 1 |
| hsa-miR-3191 NM_003784 SERPINB7  | 1 |
| hsa-miR-3199 NM_003784 SERPINB7  | 1 |
| hsa-miR-4257 NM_003784 SERPINB7  | 1 |
| hsa-miR-4327 NM_003784 SERPINB7  | 1 |
| hsa-miR-4270 NM_003784 SERPINB7  | 1 |
| hsa-miR-4271 NM_003784 SERPINB7  | 1 |
| hsa-miR-3714 NM_003784 SERPINB7  | 1 |
| hsa-miR-3909 NM_003784 SERPINB7  | 1 |
| hsa-miR-4482 NM_003784 SERPINB7  | 1 |
| hsa-miR-4489 NM_003784 SERPINB7  | 1 |
| hsa-miR-4533 NM_003784 SERPINB7  | 1 |

|                          |          |   |
|--------------------------|----------|---|
| hsa-miR-3976 NM_003784   | SERPINB7 | 1 |
| hsa-miR-4667 NM_003784   | SERPINB7 | 1 |
| hsa-miR-4669 NM_003784   | SERPINB7 | 1 |
| hsa-miR-471C NM_003784   | SERPINB7 | 1 |
| hsa-miR-4716 NM_003784   | SERPINB7 | 1 |
| hsa-miR-4732 NM_003784   | SERPINB7 | 1 |
| hsa-miR-4743 NM_003784   | SERPINB7 | 1 |
| hsa-miR-4769 NM_003784   | SERPINB7 | 1 |
| hsa-miR-480C NM_003784   | SERPINB7 | 1 |
| hsa-miR-5572 NM_003784   | SERPINB7 | 1 |
| hsa-miR-5685 NM_003784   | SERPINB7 | 1 |
| hsa-miR-6085 NM_003784   | SERPINB7 | 1 |
| hsa-miR-6134 NM_003784   | SERPINB7 | 1 |
| hsa-miR-6511 NM_003784   | SERPINB7 | 1 |
| hsa-miR-6513 NM_003784   | SERPINB7 | 1 |
| hsa-miR-6734 NM_003784   | SERPINB7 | 1 |
| hsa-miR-676C NM_003784   | SERPINB7 | 1 |
| hsa-miR-6762 NM_003784   | SERPINB7 | 1 |
| hsa-miR-6763 NM_003784   | SERPINB7 | 1 |
| hsa-miR-6776 NM_003784   | SERPINB7 | 1 |
| hsa-miR-6779 NM_003784   | SERPINB7 | 1 |
| hsa-miR-6779 NM_003784   | SERPINB7 | 1 |
| hsa-miR-6793 NM_003784   | SERPINB7 | 1 |
| hsa-miR-6795 NM_003784   | SERPINB7 | 1 |
| hsa-miR-6808 NM_003784   | SERPINB7 | 1 |
| hsa-miR-6812 NM_003784   | SERPINB7 | 1 |
| hsa-miR-6812 NM_003784   | SERPINB7 | 1 |
| hsa-miR-6823 NM_003784   | SERPINB7 | 1 |
| hsa-miR-6825 NM_003784   | SERPINB7 | 1 |
| hsa-miR-6831 NM_003784   | SERPINB7 | 1 |
| hsa-miR-6833 NM_003784   | SERPINB7 | 1 |
| hsa-miR-6838 NM_003784   | SERPINB7 | 1 |
| hsa-miR-6851 NM_003784   | SERPINB7 | 1 |
| hsa-miR-6857 NM_003784   | SERPINB7 | 1 |
| hsa-miR-6862 NM_003784   | SERPINB7 | 1 |
| hsa-miR-6864 NM_003784   | SERPINB7 | 1 |
| hsa-miR-6876 NM_003784   | SERPINB7 | 1 |
| hsa-miR-7111 NM_003784   | SERPINB7 | 1 |
| hsa-miR-4433 NM_003784   | SERPINB7 | 1 |
| hsa-miR-1273 NM_003784   | SERPINB7 | 1 |
| hsa-miR-8082 NM_003784   | SERPINB7 | 1 |
| hsa-miR-1039 NM_003784   | SERPINB7 | 1 |
| hsa-miR-104C NM_003784   | SERPINB7 | 1 |
| hsa-miR-23a- NM_0010401  | SERPINB7 | 1 |
| hsa-miR-28-5j NM_0010401 | SERPINB7 | 1 |
| hsa-miR-29b- NM_0010401  | SERPINB7 | 1 |
| hsa-miR-197- NM_0010401  | SERPINB7 | 1 |
| hsa-miR-203a NM_0010401  | SERPINB7 | 1 |
| hsa-miR-204- NM_0010401  | SERPINB7 | 1 |
| hsa-miR-217- NM_0010401  | SERPINB7 | 1 |
| hsa-miR-152- NM_0010401  | SERPINB7 | 1 |
| hsa-miR-34b- NM_0010401  | SERPINB7 | 1 |
| hsa-miR-483- NM_0010401  | SERPINB7 | 1 |
| hsa-miR-490- NM_0010401  | SERPINB7 | 1 |
| hsa-miR-526b NM_0010401  | SERPINB7 | 1 |
| hsa-miR-525- NM_0010401  | SERPINB7 | 1 |
| hsa-miR-504- NM_0010401  | SERPINB7 | 1 |
| hsa-miR-583 NM_0010401   | SERPINB7 | 1 |
| hsa-miR-769- NM_0010401  | SERPINB7 | 1 |
| hsa-miR-761 NM_0010401   | SERPINB7 | 1 |
| hsa-miR-708- NM_0010401  | SERPINB7 | 1 |
| hsa-miR-885- NM_0010401  | SERPINB7 | 1 |
| hsa-miR-1182 NM_0010401  | SERPINB7 | 1 |
| hsa-miR-1182 NM_0010401  | SERPINB7 | 1 |
| hsa-miR-1226 NM_0010401  | SERPINB7 | 1 |
| hsa-miR-1208 NM_0010401  | SERPINB7 | 1 |
| hsa-miR-1288 NM_0010401  | SERPINB7 | 1 |
| hsa-miR-1914 NM_0010401  | SERPINB7 | 1 |
| hsa-miR-3141 NM_0010401  | SERPINB7 | 1 |
| hsa-miR-3151 NM_0010401  | SERPINB7 | 1 |
| hsa-miR-3153 NM_0010401  | SERPINB7 | 1 |
| hsa-miR-3187 NM_0010401  | SERPINB7 | 1 |
| hsa-miR-3199 NM_0010401  | SERPINB7 | 1 |
| hsa-miR-4327 NM_0010401  | SERPINB7 | 1 |
| hsa-miR-427C NM_0010401  | SERPINB7 | 1 |
| hsa-miR-4271 NM_0010401  | SERPINB7 | 1 |
| hsa-miR-3714 NM_0010401  | SERPINB7 | 1 |
| hsa-miR-3689 NM_0010401  | SERPINB7 | 1 |
| hsa-miR-4462 NM_0010401  | SERPINB7 | 1 |
| hsa-miR-3689 NM_0010401  | SERPINB7 | 1 |
| hsa-miR-3689 NM_0010401  | SERPINB7 | 1 |
| hsa-miR-4482 NM_0010401  | SERPINB7 | 1 |
| hsa-miR-4489 NM_0010401  | SERPINB7 | 1 |
| hsa-miR-4533 NM_0010401  | SERPINB7 | 1 |
| hsa-miR-3976 NM_0010401  | SERPINB7 | 1 |
| hsa-miR-471C NM_0010401  | SERPINB7 | 1 |
| hsa-miR-4723 NM_0010401  | SERPINB7 | 1 |
| hsa-miR-4726 NM_0010401  | SERPINB7 | 1 |
| hsa-miR-475C NM_0010401  | SERPINB7 | 1 |
| hsa-miR-4769 NM_0010401  | SERPINB7 | 1 |
| hsa-miR-5093 NM_0010401  | SERPINB7 | 1 |
| hsa-miR-5572 NM_0010401  | SERPINB7 | 1 |
| hsa-miR-5685 NM_0010401  | SERPINB7 | 1 |
| hsa-miR-6085 NM_0010401  | SERPINB7 | 1 |

|               |            |          |            |
|---------------|------------|----------|------------|
| hsa-miR-6086  | NM_0010401 | SERPINB7 | 1          |
| hsa-miR-6090  | NM_0010401 | SERPINB7 | 1          |
| hsa-miR-6132  | NM_0010401 | SERPINB7 | 1          |
| hsa-miR-6134  | NM_0010401 | SERPINB7 | 1          |
| hsa-miR-6513  | NM_0010401 | SERPINB7 | 1          |
| hsa-miR-6717  | NM_0010401 | SERPINB7 | 1          |
| hsa-miR-6731  | NM_0010401 | SERPINB7 | 1          |
| hsa-miR-6732  | NM_0010401 | SERPINB7 | 1          |
| hsa-miR-6736  | NM_0010401 | SERPINB7 | 1          |
| hsa-miR-6762  | NM_0010401 | SERPINB7 | 1          |
| hsa-miR-6763  | NM_0010401 | SERPINB7 | 1          |
| hsa-miR-6776  | NM_0010401 | SERPINB7 | 1          |
| hsa-miR-6779  | NM_0010401 | SERPINB7 | 1          |
| hsa-miR-6793  | NM_0010401 | SERPINB7 | 1          |
| hsa-miR-6795  | NM_0010401 | SERPINB7 | 1          |
| hsa-miR-6799  | NM_0010401 | SERPINB7 | 1          |
| hsa-miR-6808  | NM_0010401 | SERPINB7 | 1          |
| hsa-miR-6812  | NM_0010401 | SERPINB7 | 1          |
| hsa-miR-6812  | NM_0010401 | SERPINB7 | 1          |
| hsa-miR-6821  | NM_0010401 | SERPINB7 | 1          |
| hsa-miR-6823  | NM_0010401 | SERPINB7 | 1          |
| hsa-miR-6825  | NM_0010401 | SERPINB7 | 1          |
| hsa-miR-6826  | NM_0010401 | SERPINB7 | 1          |
| hsa-miR-6831  | NM_0010401 | SERPINB7 | 1          |
| hsa-miR-6833  | NM_0010401 | SERPINB7 | 1          |
| hsa-miR-6838  | NM_0010401 | SERPINB7 | 1          |
| hsa-miR-6851  | NM_0010401 | SERPINB7 | 1          |
| hsa-miR-6857  | NM_0010401 | SERPINB7 | 1          |
| hsa-miR-6765  | NM_0010401 | SERPINB7 | 1          |
| hsa-miR-6862  | NM_0010401 | SERPINB7 | 1          |
| hsa-miR-6864  | NM_0010401 | SERPINB7 | 1          |
| hsa-miR-6876  | NM_0010401 | SERPINB7 | 1          |
| hsa-miR-6893  | NM_0010401 | SERPINB7 | 1          |
| hsa-miR-7111  | NM_0010401 | SERPINB7 | 1          |
| hsa-miR-7161  | NM_0010401 | SERPINB7 | 1          |
| hsa-miR-1273  | NM_0010401 | SERPINB7 | 1          |
| hsa-miR-104C  | NM_0010401 | SERPINB7 | 1          |
| hsa-miR-885-  | NM_144654  | C9orf116 | 0.96153846 |
| hsa-miR-4793  | NM_144654  | C9orf116 | 0.96153846 |
| hsa-miR-892c  | NM_144654  | C9orf116 | 0.96153846 |
| hsa-miR-885-  | NM_0010482 | C9orf116 | 0.96153846 |
| hsa-miR-4793  | NM_0010482 | C9orf116 | 0.96153846 |
| hsa-miR-892c  | NM_0010482 | C9orf116 | 0.96153846 |
| hsa-miR-3130  | NM_144654  | C9orf116 | 0.97435897 |
| hsa-miR-1233  | NM_144654  | C9orf116 | 0.98076923 |
| hsa-miR-4701  | NM_144654  | C9orf116 | 0.98076923 |
| hsa-miR-6816  | NM_144654  | C9orf116 | 0.98076923 |
| hsa-miR-1233  | NM_0010482 | C9orf116 | 0.98076923 |
| hsa-miR-4701  | NM_0010482 | C9orf116 | 0.98076923 |
| hsa-miR-6816  | NM_0010482 | C9orf116 | 0.98076923 |
| hsa-miR-3185  | NM_144654  | C9orf116 | 0.98717949 |
| hsa-miR-3185  | NM_0010482 | C9orf116 | 0.98717949 |
| hsa-let-7b-5p | NM_144654  | C9orf116 | 1          |
| hsa-let-7e-3p | NM_144654  | C9orf116 | 1          |
| hsa-miR-22-5j | NM_144654  | C9orf116 | 1          |
| hsa-miR-25-5j | NM_144654  | C9orf116 | 1          |
| hsa-miR-92a-  | NM_144654  | C9orf116 | 1          |
| hsa-miR-197-  | NM_144654  | C9orf116 | 1          |
| hsa-miR-197-  | NM_144654  | C9orf116 | 1          |
| hsa-miR-34a-  | NM_144654  | C9orf116 | 1          |
| hsa-miR-203a  | NM_144654  | C9orf116 | 1          |
| hsa-miR-210-  | NM_144654  | C9orf116 | 1          |
| hsa-let-7i-5p | NM_144654  | C9orf116 | 1          |
| hsa-miR-30b-  | NM_144654  | C9orf116 | 1          |
| hsa-miR-145-  | NM_144654  | C9orf116 | 1          |
| hsa-miR-125a  | NM_144654  | C9orf116 | 1          |
| hsa-miR-149-  | NM_144654  | C9orf116 | 1          |
| hsa-miR-149-  | NM_144654  | C9orf116 | 1          |
| hsa-miR-34b-  | NM_144654  | C9orf116 | 1          |
| hsa-miR-365a  | NM_144654  | C9orf116 | 1          |
| hsa-miR-365b  | NM_144654  | C9orf116 | 1          |
| hsa-miR-370-  | NM_144654  | C9orf116 | 1          |
| hsa-miR-328-  | NM_144654  | C9orf116 | 1          |
| hsa-miR-345-  | NM_144654  | C9orf116 | 1          |
| hsa-miR-423-  | NM_144654  | C9orf116 | 1          |
| hsa-miR-449a  | NM_144654  | C9orf116 | 1          |
| hsa-miR-511-  | NM_144654  | C9orf116 | 1          |
| hsa-miR-193b  | NM_144654  | C9orf116 | 1          |
| hsa-miR-512-  | NM_144654  | C9orf116 | 1          |
| hsa-miR-519c  | NM_144654  | C9orf116 | 1          |
| hsa-miR-519b  | NM_144654  | C9orf116 | 1          |
| hsa-miR-523-  | NM_144654  | C9orf116 | 1          |
| hsa-miR-518c  | NM_144654  | C9orf116 | 1          |
| hsa-miR-518e  | NM_144654  | C9orf116 | 1          |
| hsa-miR-522-  | NM_144654  | C9orf116 | 1          |
| hsa-miR-519a  | NM_144654  | C9orf116 | 1          |
| hsa-miR-510-  | NM_144654  | C9orf116 | 1          |
| hsa-miR-92b-  | NM_144654  | C9orf116 | 1          |
| hsa-miR-92b-  | NM_144654  | C9orf116 | 1          |
| hsa-miR-550a  | NM_144654  | C9orf116 | 1          |
| hsa-miR-611   | NM_144654  | C9orf116 | 1          |
| hsa-miR-612   | NM_144654  | C9orf116 | 1          |
| hsa-miR-616-  | NM_144654  | C9orf116 | 1          |
| hsa-miR-630   | NM_144654  | C9orf116 | 1          |

|              |           |          |   |
|--------------|-----------|----------|---|
| hsa-miR-634  | NM_144654 | C9orf116 | 1 |
| hsa-miR-650  | NM_144654 | C9orf116 | 1 |
| hsa-miR-671  | NM_144654 | C9orf116 | 1 |
| hsa-miR-1224 | NM_144654 | C9orf116 | 1 |
| hsa-miR-1468 | NM_144654 | C9orf116 | 1 |
| hsa-miR-766  | NM_144654 | C9orf116 | 1 |
| hsa-miR-298  | NM_144654 | C9orf116 | 1 |
| hsa-miR-216b | NM_144654 | C9orf116 | 1 |
| hsa-miR-920  | NM_144654 | C9orf116 | 1 |
| hsa-miR-940  | NM_144654 | C9orf116 | 1 |
| hsa-miR-1182 | NM_144654 | C9orf116 | 1 |
| hsa-miR-1183 | NM_144654 | C9orf116 | 1 |
| hsa-miR-1184 | NM_144654 | C9orf116 | 1 |
| hsa-miR-1233 | NM_144654 | C9orf116 | 1 |
| hsa-miR-1207 | NM_144654 | C9orf116 | 1 |
| hsa-miR-1293 | NM_144654 | C9orf116 | 1 |
| hsa-miR-1258 | NM_144654 | C9orf116 | 1 |
| hsa-miR-1268 | NM_144654 | C9orf116 | 1 |
| hsa-miR-1275 | NM_144654 | C9orf116 | 1 |
| hsa-miR-513b | NM_144654 | C9orf116 | 1 |
| hsa-miR-1197 | NM_144654 | C9orf116 | 1 |
| hsa-miR-1539 | NM_144654 | C9orf116 | 1 |
| hsa-miR-3132 | NM_144654 | C9orf116 | 1 |
| hsa-miR-3157 | NM_144654 | C9orf116 | 1 |
| hsa-miR-1193 | NM_144654 | C9orf116 | 1 |
| hsa-miR-3190 | NM_144654 | C9orf116 | 1 |
| hsa-miR-3190 | NM_144654 | C9orf116 | 1 |
| hsa-miR-3192 | NM_144654 | C9orf116 | 1 |
| hsa-miR-3196 | NM_144654 | C9orf116 | 1 |
| hsa-miR-3198 | NM_144654 | C9orf116 | 1 |
| hsa-miR-378c | NM_144654 | C9orf116 | 1 |
| hsa-miR-4295 | NM_144654 | C9orf116 | 1 |
| hsa-miR-4309 | NM_144654 | C9orf116 | 1 |
| hsa-miR-4312 | NM_144654 | C9orf116 | 1 |
| hsa-miR-4266 | NM_144654 | C9orf116 | 1 |
| hsa-miR-3619 | NM_144654 | C9orf116 | 1 |
| hsa-miR-3652 | NM_144654 | C9orf116 | 1 |
| hsa-miR-3689 | NM_144654 | C9orf116 | 1 |
| hsa-miR-3714 | NM_144654 | C9orf116 | 1 |
| hsa-miR-3937 | NM_144654 | C9orf116 | 1 |
| hsa-miR-3943 | NM_144654 | C9orf116 | 1 |
| hsa-miR-550b | NM_144654 | C9orf116 | 1 |
| hsa-miR-1268 | NM_144654 | C9orf116 | 1 |
| hsa-miR-4436 | NM_144654 | C9orf116 | 1 |
| hsa-miR-4446 | NM_144654 | C9orf116 | 1 |
| hsa-miR-4448 | NM_144654 | C9orf116 | 1 |
| hsa-miR-4463 | NM_144654 | C9orf116 | 1 |
| hsa-miR-4467 | NM_144654 | C9orf116 | 1 |
| hsa-miR-4474 | NM_144654 | C9orf116 | 1 |
| hsa-miR-4481 | NM_144654 | C9orf116 | 1 |
| hsa-miR-4483 | NM_144654 | C9orf116 | 1 |
| hsa-miR-4484 | NM_144654 | C9orf116 | 1 |
| hsa-miR-4506 | NM_144654 | C9orf116 | 1 |
| hsa-miR-2392 | NM_144654 | C9orf116 | 1 |
| hsa-miR-4525 | NM_144654 | C9orf116 | 1 |
| hsa-miR-4535 | NM_144654 | C9orf116 | 1 |
| hsa-miR-4539 | NM_144654 | C9orf116 | 1 |
| hsa-miR-4632 | NM_144654 | C9orf116 | 1 |
| hsa-miR-4654 | NM_144654 | C9orf116 | 1 |
| hsa-miR-4684 | NM_144654 | C9orf116 | 1 |
| hsa-miR-4687 | NM_144654 | C9orf116 | 1 |
| hsa-miR-4692 | NM_144654 | C9orf116 | 1 |
| hsa-miR-4695 | NM_144654 | C9orf116 | 1 |
| hsa-miR-4697 | NM_144654 | C9orf116 | 1 |
| hsa-miR-4697 | NM_144654 | C9orf116 | 1 |
| hsa-miR-4709 | NM_144654 | C9orf116 | 1 |
| hsa-miR-4710 | NM_144654 | C9orf116 | 1 |
| hsa-miR-4710 | NM_144654 | C9orf116 | 1 |
| hsa-miR-4715 | NM_144654 | C9orf116 | 1 |
| hsa-miR-4717 | NM_144654 | C9orf116 | 1 |
| hsa-miR-4722 | NM_144654 | C9orf116 | 1 |
| hsa-miR-4726 | NM_144654 | C9orf116 | 1 |
| hsa-miR-4735 | NM_144654 | C9orf116 | 1 |
| hsa-miR-4739 | NM_144654 | C9orf116 | 1 |
| hsa-miR-4747 | NM_144654 | C9orf116 | 1 |
| hsa-miR-4750 | NM_144654 | C9orf116 | 1 |
| hsa-miR-4761 | NM_144654 | C9orf116 | 1 |
| hsa-miR-5008 | NM_144654 | C9orf116 | 1 |
| hsa-miR-5093 | NM_144654 | C9orf116 | 1 |
| hsa-miR-5187 | NM_144654 | C9orf116 | 1 |
| hsa-miR-5192 | NM_144654 | C9orf116 | 1 |
| hsa-miR-5572 | NM_144654 | C9orf116 | 1 |
| hsa-miR-664b | NM_144654 | C9orf116 | 1 |
| hsa-miR-5698 | NM_144654 | C9orf116 | 1 |
| hsa-miR-5705 | NM_144654 | C9orf116 | 1 |
| hsa-miR-5705 | NM_144654 | C9orf116 | 1 |
| hsa-miR-6069 | NM_144654 | C9orf116 | 1 |
| hsa-miR-6070 | NM_144654 | C9orf116 | 1 |
| hsa-miR-6125 | NM_144654 | C9orf116 | 1 |
| hsa-miR-6131 | NM_144654 | C9orf116 | 1 |
| hsa-miR-6134 | NM_144654 | C9orf116 | 1 |
| hsa-miR-6165 | NM_144654 | C9orf116 | 1 |
| hsa-miR-6499 | NM_144654 | C9orf116 | 1 |
| hsa-miR-6510 | NM_144654 | C9orf116 | 1 |

|                          |          |   |
|--------------------------|----------|---|
| hsa-miR-6515 NM_144654   | C9orf116 | 1 |
| hsa-miR-6716 NM_144654   | C9orf116 | 1 |
| hsa-miR-6718 NM_144654   | C9orf116 | 1 |
| hsa-miR-6725 NM_144654   | C9orf116 | 1 |
| hsa-miR-6730 NM_144654   | C9orf116 | 1 |
| hsa-miR-6732 NM_144654   | C9orf116 | 1 |
| hsa-miR-6735 NM_144654   | C9orf116 | 1 |
| hsa-miR-6738 NM_144654   | C9orf116 | 1 |
| hsa-miR-6742 NM_144654   | C9orf116 | 1 |
| hsa-miR-6744 NM_144654   | C9orf116 | 1 |
| hsa-miR-6744 NM_144654   | C9orf116 | 1 |
| hsa-miR-6747 NM_144654   | C9orf116 | 1 |
| hsa-miR-6747 NM_144654   | C9orf116 | 1 |
| hsa-miR-6754 NM_144654   | C9orf116 | 1 |
| hsa-miR-6754 NM_144654   | C9orf116 | 1 |
| hsa-miR-6755 NM_144654   | C9orf116 | 1 |
| hsa-miR-6766 NM_144654   | C9orf116 | 1 |
| hsa-miR-6777 NM_144654   | C9orf116 | 1 |
| hsa-miR-6780 NM_144654   | C9orf116 | 1 |
| hsa-miR-6781 NM_144654   | C9orf116 | 1 |
| hsa-miR-6787 NM_144654   | C9orf116 | 1 |
| hsa-miR-6790 NM_144654   | C9orf116 | 1 |
| hsa-miR-6794 NM_144654   | C9orf116 | 1 |
| hsa-miR-6796 NM_144654   | C9orf116 | 1 |
| hsa-miR-6795 NM_144654   | C9orf116 | 1 |
| hsa-miR-6806 NM_144654   | C9orf116 | 1 |
| hsa-miR-6812 NM_144654   | C9orf116 | 1 |
| hsa-miR-6824 NM_144654   | C9orf116 | 1 |
| hsa-miR-6825 NM_144654   | C9orf116 | 1 |
| hsa-miR-6833 NM_144654   | C9orf116 | 1 |
| hsa-miR-6780 NM_144654   | C9orf116 | 1 |
| hsa-miR-6842 NM_144654   | C9orf116 | 1 |
| hsa-miR-6845 NM_144654   | C9orf116 | 1 |
| hsa-miR-6765 NM_144654   | C9orf116 | 1 |
| hsa-miR-6876 NM_144654   | C9orf116 | 1 |
| hsa-miR-6875 NM_144654   | C9orf116 | 1 |
| hsa-miR-6883 NM_144654   | C9orf116 | 1 |
| hsa-miR-6885 NM_144654   | C9orf116 | 1 |
| hsa-miR-6886 NM_144654   | C9orf116 | 1 |
| hsa-miR-6890 NM_144654   | C9orf116 | 1 |
| hsa-miR-7111 NM_144654   | C9orf116 | 1 |
| hsa-miR-7112 NM_144654   | C9orf116 | 1 |
| hsa-miR-7112 NM_144654   | C9orf116 | 1 |
| hsa-miR-7152 NM_144654   | C9orf116 | 1 |
| hsa-miR-7160 NM_144654   | C9orf116 | 1 |
| hsa-miR-7843 NM_144654   | C9orf116 | 1 |
| hsa-miR-7854 NM_144654   | C9orf116 | 1 |
| hsa-miR-8052 NM_144654   | C9orf116 | 1 |
| hsa-miR-8072 NM_144654   | C9orf116 | 1 |
| hsa-miR-8075 NM_144654   | C9orf116 | 1 |
| hsa-miR-8075 NM_144654   | C9orf116 | 1 |
| hsa-miR-8083 NM_144654   | C9orf116 | 1 |
| hsa-miR-1035 NM_144654   | C9orf116 | 1 |
| hsa-miR-1040 NM_144654   | C9orf116 | 1 |
| hsa-miR-1212 NM_144654   | C9orf116 | 1 |
| hsa-miR-1212 NM_144654   | C9orf116 | 1 |
| hsa-let-7b-5p NM_0010482 | C9orf116 | 1 |
| hsa-let-7e-3p NM_0010482 | C9orf116 | 1 |
| hsa-miR-25-5j NM_0010482 | C9orf116 | 1 |
| hsa-miR-197- NM_0010482  | C9orf116 | 1 |
| hsa-miR-197- NM_0010482  | C9orf116 | 1 |
| hsa-miR-34a- NM_0010482  | C9orf116 | 1 |
| hsa-miR-203a NM_0010482  | C9orf116 | 1 |
| hsa-miR-210- NM_0010482  | C9orf116 | 1 |
| hsa-let-7i-5p NM_0010482 | C9orf116 | 1 |
| hsa-miR-145- NM_0010482  | C9orf116 | 1 |
| hsa-miR-149- NM_0010482  | C9orf116 | 1 |
| hsa-miR-149- NM_0010482  | C9orf116 | 1 |
| hsa-miR-34b- NM_0010482  | C9orf116 | 1 |
| hsa-miR-365a NM_0010482  | C9orf116 | 1 |
| hsa-miR-365b NM_0010482  | C9orf116 | 1 |
| hsa-miR-449a NM_0010482  | C9orf116 | 1 |
| hsa-miR-511- NM_0010482  | C9orf116 | 1 |
| hsa-miR-512- NM_0010482  | C9orf116 | 1 |
| hsa-miR-510- NM_0010482  | C9orf116 | 1 |
| hsa-miR-92b- NM_0010482  | C9orf116 | 1 |
| hsa-miR-550a NM_0010482  | C9orf116 | 1 |
| hsa-miR-611 NM_0010482   | C9orf116 | 1 |
| hsa-miR-612 NM_0010482   | C9orf116 | 1 |
| hsa-miR-630 NM_0010482   | C9orf116 | 1 |
| hsa-miR-650 NM_0010482   | C9orf116 | 1 |
| hsa-miR-671- NM_0010482  | C9orf116 | 1 |
| hsa-miR-1468 NM_0010482  | C9orf116 | 1 |
| hsa-miR-216t NM_0010482  | C9orf116 | 1 |
| hsa-miR-920 NM_0010482   | C9orf116 | 1 |
| hsa-miR-940 NM_0010482   | C9orf116 | 1 |
| hsa-miR-1182 NM_0010482  | C9orf116 | 1 |
| hsa-miR-1184 NM_0010482  | C9orf116 | 1 |
| hsa-miR-1233 NM_0010482  | C9orf116 | 1 |
| hsa-miR-1207 NM_0010482  | C9orf116 | 1 |
| hsa-miR-1258 NM_0010482  | C9orf116 | 1 |
| hsa-miR-1268 NM_0010482  | C9orf116 | 1 |
| hsa-miR-1275 NM_0010482  | C9orf116 | 1 |



|                                  |            |
|----------------------------------|------------|
| hsa-miR-1197 NM_0010482 C9orf116 | 1          |
| hsa-miR-1535 NM_0010482 C9orf116 | 1          |
| hsa-miR-3157 NM_0010482 C9orf116 | 1          |
| hsa-miR-317C NM_0010482 C9orf116 | 1          |
| hsa-miR-1193 NM_0010482 C9orf116 | 1          |
| hsa-miR-319C NM_0010482 C9orf116 | 1          |
| hsa-miR-319C NM_0010482 C9orf116 | 1          |
| hsa-miR-3192 NM_0010482 C9orf116 | 1          |
| hsa-miR-3196 NM_0010482 C9orf116 | 1          |
| hsa-miR-3198 NM_0010482 C9orf116 | 1          |
| hsa-miR-378c NM_0010482 C9orf116 | 1          |
| hsa-miR-4312 NM_0010482 C9orf116 | 1          |
| hsa-miR-4266 NM_0010482 C9orf116 | 1          |
| hsa-miR-3652 NM_0010482 C9orf116 | 1          |
| hsa-miR-3655 NM_0010482 C9orf116 | 1          |
| hsa-miR-3675 NM_0010482 C9orf116 | 1          |
| hsa-miR-3937 NM_0010482 C9orf116 | 1          |
| hsa-miR-550b NM_0010482 C9orf116 | 1          |
| hsa-miR-4436 NM_0010482 C9orf116 | 1          |
| hsa-miR-4446 NM_0010482 C9orf116 | 1          |
| hsa-miR-4448 NM_0010482 C9orf116 | 1          |
| hsa-miR-4467 NM_0010482 C9orf116 | 1          |
| hsa-miR-4484 NM_0010482 C9orf116 | 1          |
| hsa-miR-4632 NM_0010482 C9orf116 | 1          |
| hsa-miR-4654 NM_0010482 C9orf116 | 1          |
| hsa-miR-4687 NM_0010482 C9orf116 | 1          |
| hsa-miR-4692 NM_0010482 C9orf116 | 1          |
| hsa-miR-4697 NM_0010482 C9orf116 | 1          |
| hsa-miR-471C NM_0010482 C9orf116 | 1          |
| hsa-miR-471C NM_0010482 C9orf116 | 1          |
| hsa-miR-4717 NM_0010482 C9orf116 | 1          |
| hsa-miR-4722 NM_0010482 C9orf116 | 1          |
| hsa-miR-4735 NM_0010482 C9orf116 | 1          |
| hsa-miR-4747 NM_0010482 C9orf116 | 1          |
| hsa-miR-475C NM_0010482 C9orf116 | 1          |
| hsa-miR-4761 NM_0010482 C9orf116 | 1          |
| hsa-miR-5187 NM_0010482 C9orf116 | 1          |
| hsa-miR-5192 NM_0010482 C9orf116 | 1          |
| hsa-miR-5572 NM_0010482 C9orf116 | 1          |
| hsa-miR-664b NM_0010482 C9orf116 | 1          |
| hsa-miR-5698 NM_0010482 C9orf116 | 1          |
| hsa-miR-5705 NM_0010482 C9orf116 | 1          |
| hsa-miR-6125 NM_0010482 C9orf116 | 1          |
| hsa-miR-6134 NM_0010482 C9orf116 | 1          |
| hsa-miR-6495 NM_0010482 C9orf116 | 1          |
| hsa-miR-651C NM_0010482 C9orf116 | 1          |
| hsa-miR-6725 NM_0010482 C9orf116 | 1          |
| hsa-miR-6732 NM_0010482 C9orf116 | 1          |
| hsa-miR-6735 NM_0010482 C9orf116 | 1          |
| hsa-miR-6738 NM_0010482 C9orf116 | 1          |
| hsa-miR-6744 NM_0010482 C9orf116 | 1          |
| hsa-miR-6747 NM_0010482 C9orf116 | 1          |
| hsa-miR-6754 NM_0010482 C9orf116 | 1          |
| hsa-miR-6754 NM_0010482 C9orf116 | 1          |
| hsa-miR-6759 NM_0010482 C9orf116 | 1          |
| hsa-miR-6777 NM_0010482 C9orf116 | 1          |
| hsa-miR-6781 NM_0010482 C9orf116 | 1          |
| hsa-miR-679C NM_0010482 C9orf116 | 1          |
| hsa-miR-6794 NM_0010482 C9orf116 | 1          |
| hsa-miR-6794 NM_0010482 C9orf116 | 1          |
| hsa-miR-6795 NM_0010482 C9orf116 | 1          |
| hsa-miR-6825 NM_0010482 C9orf116 | 1          |
| hsa-miR-678C NM_0010482 C9orf116 | 1          |
| hsa-miR-6842 NM_0010482 C9orf116 | 1          |
| hsa-miR-6765 NM_0010482 C9orf116 | 1          |
| hsa-miR-6876 NM_0010482 C9orf116 | 1          |
| hsa-miR-6875 NM_0010482 C9orf116 | 1          |
| hsa-miR-6883 NM_0010482 C9orf116 | 1          |
| hsa-miR-6885 NM_0010482 C9orf116 | 1          |
| hsa-miR-6886 NM_0010482 C9orf116 | 1          |
| hsa-miR-689C NM_0010482 C9orf116 | 1          |
| hsa-miR-7111 NM_0010482 C9orf116 | 1          |
| hsa-miR-7112 NM_0010482 C9orf116 | 1          |
| hsa-miR-7112 NM_0010482 C9orf116 | 1          |
| hsa-miR-7152 NM_0010482 C9orf116 | 1          |
| hsa-miR-716C NM_0010482 C9orf116 | 1          |
| hsa-miR-8052 NM_0010482 C9orf116 | 1          |
| hsa-miR-8075 NM_0010482 C9orf116 | 1          |
| hsa-miR-8083 NM_0010482 C9orf116 | 1          |
| hsa-miR-1035 NM_0010482 C9orf116 | 1          |
| hsa-miR-104C NM_0010482 C9orf116 | 1          |
| hsa-miR-1212 NM_0010482 C9orf116 | 1          |
| hsa-miR-1212 NM_0010482 C9orf116 | 1          |
| hsa-miR-7-2-3 NM_001050 SSTR2    | 0.96153846 |
| hsa-miR-99b- NM_001050 SSTR2     | 0.96153846 |
| hsa-miR-495- NM_001050 SSTR2     | 0.96153846 |
| hsa-miR-632 NM_001050 SSTR2      | 0.96153846 |
| hsa-miR-708- NM_001050 SSTR2     | 0.96153846 |
| hsa-miR-1227 NM_001050 SSTR2     | 0.96153846 |
| hsa-miR-1227 NM_001050 SSTR2     | 0.96153846 |
| hsa-miR-663b NM_001050 SSTR2     | 0.96153846 |
| hsa-miR-1258 NM_001050 SSTR2     | 0.96153846 |
| hsa-miR-4275 NM_001050 SSTR2     | 0.96153846 |
| hsa-miR-3917 NM_001050 SSTR2     | 0.96153846 |

|               |           |       |            |
|---------------|-----------|-------|------------|
| hsa-miR-4695  | NM_001050 | SSTR2 | 0.96153846 |
| hsa-miR-4776  | NM_001050 | SSTR2 | 0.96153846 |
| hsa-miR-5705  | NM_001050 | SSTR2 | 0.96153846 |
| hsa-miR-6775  | NM_001050 | SSTR2 | 0.96153846 |
| hsa-miR-6841  | NM_001050 | SSTR2 | 0.96153846 |
| hsa-miR-6852  | NM_001050 | SSTR2 | 0.96153846 |
| hsa-miR-6865  | NM_001050 | SSTR2 | 0.96923077 |
| hsa-miR-6875  | NM_001050 | SSTR2 | 0.96923077 |
| hsa-miR-361-  | NM_001050 | SSTR2 | 0.97435897 |
| hsa-miR-337-  | NM_001050 | SSTR2 | 0.97435897 |
| hsa-miR-433-  | NM_001050 | SSTR2 | 0.97435897 |
| hsa-miR-3156  | NM_001050 | SSTR2 | 0.97435897 |
| hsa-miR-4660  | NM_001050 | SSTR2 | 0.97435897 |
| hsa-miR-5085  | NM_001050 | SSTR2 | 0.97435897 |
| hsa-miR-1035  | NM_001050 | SSTR2 | 0.97435897 |
| hsa-miR-4442  | NM_001050 | SSTR2 | 0.97435897 |
| hsa-miR-4661  | NM_001050 | SSTR2 | 0.97435897 |
| hsa-miR-149-  | NM_001050 | SSTR2 | 0.98076923 |
| hsa-miR-1303  | NM_001050 | SSTR2 | 0.98076923 |
| hsa-miR-3622  | NM_001050 | SSTR2 | 0.98076923 |
| hsa-miR-3650  | NM_001050 | SSTR2 | 0.98076923 |
| hsa-miR-4421  | NM_001050 | SSTR2 | 0.98076923 |
| hsa-miR-4505  | NM_001050 | SSTR2 | 0.98076923 |
| hsa-miR-18a-  | NM_001050 | SSTR2 | 0.98461539 |
| hsa-miR-520b  | NM_001050 | SSTR2 | 0.99145299 |
| hsa-miR-519a  | NM_001050 | SSTR2 | 0.99145299 |
| hsa-let-7a-5p | NM_001050 | SSTR2 | 1          |
| hsa-let-7b-5p | NM_001050 | SSTR2 | 1          |
| hsa-let-7b-3p | NM_001050 | SSTR2 | 1          |
| hsa-let-7c-5p | NM_001050 | SSTR2 | 1          |
| hsa-let-7d-5p | NM_001050 | SSTR2 | 1          |
| hsa-let-7e-5p | NM_001050 | SSTR2 | 1          |
| hsa-miR-15a-  | NM_001050 | SSTR2 | 1          |
| hsa-miR-20a-  | NM_001050 | SSTR2 | 1          |
| hsa-miR-22-3j | NM_001050 | SSTR2 | 1          |
| hsa-miR-24-2  | NM_001050 | SSTR2 | 1          |
| hsa-miR-26a-  | NM_001050 | SSTR2 | 1          |
| hsa-miR-29a-  | NM_001050 | SSTR2 | 1          |
| hsa-miR-33a-  | NM_001050 | SSTR2 | 1          |
| hsa-miR-92a-  | NM_001050 | SSTR2 | 1          |
| hsa-miR-92a-  | NM_001050 | SSTR2 | 1          |
| hsa-miR-93-5j | NM_001050 | SSTR2 | 1          |
| hsa-miR-95-3j | NM_001050 | SSTR2 | 1          |
| hsa-miR-98-3j | NM_001050 | SSTR2 | 1          |
| hsa-miR-192-  | NM_001050 | SSTR2 | 1          |
| hsa-miR-197-  | NM_001050 | SSTR2 | 1          |
| hsa-miR-197-  | NM_001050 | SSTR2 | 1          |
| hsa-miR-208a  | NM_001050 | SSTR2 | 1          |
| hsa-miR-30d-  | NM_001050 | SSTR2 | 1          |
| hsa-miR-34a-  | NM_001050 | SSTR2 | 1          |
| hsa-miR-34a-  | NM_001050 | SSTR2 | 1          |
| hsa-miR-181a  | NM_001050 | SSTR2 | 1          |
| hsa-miR-181b  | NM_001050 | SSTR2 | 1          |
| hsa-miR-181b  | NM_001050 | SSTR2 | 1          |
| hsa-miR-204-  | NM_001050 | SSTR2 | 1          |
| hsa-miR-211-  | NM_001050 | SSTR2 | 1          |
| hsa-miR-216a  | NM_001050 | SSTR2 | 1          |
| hsa-miR-217-  | NM_001050 | SSTR2 | 1          |
| hsa-miR-219a  | NM_001050 | SSTR2 | 1          |
| hsa-miR-222-  | NM_001050 | SSTR2 | 1          |
| hsa-let-7g-5p | NM_001050 | SSTR2 | 1          |
| hsa-let-7i-5p | NM_001050 | SSTR2 | 1          |
| hsa-miR-27b-  | NM_001050 | SSTR2 | 1          |
| hsa-miR-30b-  | NM_001050 | SSTR2 | 1          |
| hsa-miR-122-  | NM_001050 | SSTR2 | 1          |
| hsa-miR-132-  | NM_001050 | SSTR2 | 1          |
| hsa-miR-135a  | NM_001050 | SSTR2 | 1          |
| hsa-miR-137-  | NM_001050 | SSTR2 | 1          |
| hsa-miR-138-  | NM_001050 | SSTR2 | 1          |
| hsa-miR-140-  | NM_001050 | SSTR2 | 1          |
| hsa-miR-125a  | NM_001050 | SSTR2 | 1          |
| hsa-miR-134-  | NM_001050 | SSTR2 | 1          |
| hsa-miR-188-  | NM_001050 | SSTR2 | 1          |
| hsa-miR-188-  | NM_001050 | SSTR2 | 1          |
| hsa-miR-188-  | NM_001050 | SSTR2 | 1          |
| hsa-miR-188-  | NM_001050 | SSTR2 | 1          |
| hsa-miR-320a  | NM_001050 | SSTR2 | 1          |
| hsa-miR-200c  | NM_001050 | SSTR2 | 1          |
| hsa-miR-194-  | NM_001050 | SSTR2 | 1          |
| hsa-miR-29c-  | NM_001050 | SSTR2 | 1          |
| hsa-miR-302a  | NM_001050 | SSTR2 | 1          |
| hsa-miR-361-  | NM_001050 | SSTR2 | 1          |
| hsa-miR-362-  | NM_001050 | SSTR2 | 1          |
| hsa-miR-302b  | NM_001050 | SSTR2 | 1          |
| hsa-miR-302b  | NM_001050 | SSTR2 | 1          |
| hsa-miR-302c  | NM_001050 | SSTR2 | 1          |
| hsa-miR-302c  | NM_001050 | SSTR2 | 1          |
| hsa-miR-381-  | NM_001050 | SSTR2 | 1          |
| hsa-miR-383-  | NM_001050 | SSTR2 | 1          |
| hsa-miR-383-  | NM_001050 | SSTR2 | 1          |
| hsa-miR-323a  | NM_001050 | SSTR2 | 1          |
| hsa-miR-326   | NM_001050 | SSTR2 | 1          |
| hsa-miR-331-  | NM_001050 | SSTR2 | 1          |
| hsa-miR-338-  | NM_001050 | SSTR2 | 1          |

|              |           |       |   |
|--------------|-----------|-------|---|
| hsa-miR-338- | NM_001050 | SSTR2 | 1 |
| hsa-miR-133b | NM_001050 | SSTR2 | 1 |
| hsa-miR-196b | NM_001050 | SSTR2 | 1 |
| hsa-miR-196b | NM_001050 | SSTR2 | 1 |
| hsa-miR-423- | NM_001050 | SSTR2 | 1 |
| hsa-miR-431- | NM_001050 | SSTR2 | 1 |
| hsa-miR-410- | NM_001050 | SSTR2 | 1 |
| hsa-miR-483- | NM_001050 | SSTR2 | 1 |
| hsa-miR-485- | NM_001050 | SSTR2 | 1 |
| hsa-miR-486- | NM_001050 | SSTR2 | 1 |
| hsa-miR-486- | NM_001050 | SSTR2 | 1 |
| hsa-miR-489- | NM_001050 | SSTR2 | 1 |
| hsa-miR-491- | NM_001050 | SSTR2 | 1 |
| hsa-miR-146b | NM_001050 | SSTR2 | 1 |
| hsa-miR-202- | NM_001050 | SSTR2 | 1 |
| hsa-miR-493- | NM_001050 | SSTR2 | 1 |
| hsa-miR-193b | NM_001050 | SSTR2 | 1 |
| hsa-miR-512- | NM_001050 | SSTR2 | 1 |
| hsa-miR-526b | NM_001050 | SSTR2 | 1 |
| hsa-miR-518f | NM_001050 | SSTR2 | 1 |
| hsa-miR-516b | NM_001050 | SSTR2 | 1 |
| hsa-miR-518a | NM_001050 | SSTR2 | 1 |
| hsa-miR-527  | NM_001050 | SSTR2 | 1 |
| hsa-miR-500a | NM_001050 | SSTR2 | 1 |
| hsa-miR-502- | NM_001050 | SSTR2 | 1 |
| hsa-miR-506- | NM_001050 | SSTR2 | 1 |
| hsa-miR-514a | NM_001050 | SSTR2 | 1 |
| hsa-miR-455- | NM_001050 | SSTR2 | 1 |
| hsa-miR-551a | NM_001050 | SSTR2 | 1 |
| hsa-miR-551a | NM_001050 | SSTR2 | 1 |
| hsa-miR-552- | NM_001050 | SSTR2 | 1 |
| hsa-miR-554  | NM_001050 | SSTR2 | 1 |
| hsa-miR-557  | NM_001050 | SSTR2 | 1 |
| hsa-miR-551b | NM_001050 | SSTR2 | 1 |
| hsa-miR-585- | NM_001050 | SSTR2 | 1 |
| hsa-miR-588  | NM_001050 | SSTR2 | 1 |
| hsa-miR-550a | NM_001050 | SSTR2 | 1 |
| hsa-miR-550a | NM_001050 | SSTR2 | 1 |
| hsa-miR-604  | NM_001050 | SSTR2 | 1 |
| hsa-miR-604  | NM_001050 | SSTR2 | 1 |
| hsa-miR-609  | NM_001050 | SSTR2 | 1 |
| hsa-miR-610  | NM_001050 | SSTR2 | 1 |
| hsa-miR-613  | NM_001050 | SSTR2 | 1 |
| hsa-miR-614  | NM_001050 | SSTR2 | 1 |
| hsa-miR-615- | NM_001050 | SSTR2 | 1 |
| hsa-miR-619- | NM_001050 | SSTR2 | 1 |
| hsa-miR-619- | NM_001050 | SSTR2 | 1 |
| hsa-miR-622  | NM_001050 | SSTR2 | 1 |
| hsa-miR-625- | NM_001050 | SSTR2 | 1 |
| hsa-miR-627- | NM_001050 | SSTR2 | 1 |
| hsa-miR-629- | NM_001050 | SSTR2 | 1 |
| hsa-miR-629- | NM_001050 | SSTR2 | 1 |
| hsa-miR-630  | NM_001050 | SSTR2 | 1 |
| hsa-miR-642a | NM_001050 | SSTR2 | 1 |
| hsa-miR-645  | NM_001050 | SSTR2 | 1 |
| hsa-miR-647  | NM_001050 | SSTR2 | 1 |
| hsa-miR-650  | NM_001050 | SSTR2 | 1 |
| hsa-miR-662  | NM_001050 | SSTR2 | 1 |
| hsa-miR-653- | NM_001050 | SSTR2 | 1 |
| hsa-miR-655- | NM_001050 | SSTR2 | 1 |
| hsa-miR-655- | NM_001050 | SSTR2 | 1 |
| hsa-miR-658  | NM_001050 | SSTR2 | 1 |
| hsa-miR-659- | NM_001050 | SSTR2 | 1 |
| hsa-miR-542- | NM_001050 | SSTR2 | 1 |
| hsa-miR-758- | NM_001050 | SSTR2 | 1 |
| hsa-miR-671- | NM_001050 | SSTR2 | 1 |
| hsa-miR-668- | NM_001050 | SSTR2 | 1 |
| hsa-miR-668- | NM_001050 | SSTR2 | 1 |
| hsa-miR-550a | NM_001050 | SSTR2 | 1 |
| hsa-miR-1224 | NM_001050 | SSTR2 | 1 |
| hsa-miR-320c | NM_001050 | SSTR2 | 1 |
| hsa-miR-1271 | NM_001050 | SSTR2 | 1 |
| hsa-miR-1271 | NM_001050 | SSTR2 | 1 |
| hsa-miR-764  | NM_001050 | SSTR2 | 1 |
| hsa-miR-891a | NM_001050 | SSTR2 | 1 |
| hsa-miR-892a | NM_001050 | SSTR2 | 1 |
| hsa-miR-892b | NM_001050 | SSTR2 | 1 |
| hsa-miR-885- | NM_001050 | SSTR2 | 1 |
| hsa-miR-885- | NM_001050 | SSTR2 | 1 |
| hsa-miR-885- | NM_001050 | SSTR2 | 1 |
| hsa-miR-885- | NM_001050 | SSTR2 | 1 |
| hsa-miR-877- | NM_001050 | SSTR2 | 1 |
| hsa-miR-887- | NM_001050 | SSTR2 | 1 |
| hsa-miR-887- | NM_001050 | SSTR2 | 1 |
| hsa-miR-374b | NM_001050 | SSTR2 | 1 |
| hsa-miR-760  | NM_001050 | SSTR2 | 1 |
| hsa-miR-216b | NM_001050 | SSTR2 | 1 |
| hsa-miR-924  | NM_001050 | SSTR2 | 1 |
| hsa-miR-936  | NM_001050 | SSTR2 | 1 |
| hsa-miR-937- | NM_001050 | SSTR2 | 1 |
| hsa-miR-940  | NM_001050 | SSTR2 | 1 |
| hsa-miR-942- | NM_001050 | SSTR2 | 1 |
| hsa-miR-942- | NM_001050 | SSTR2 | 1 |
| hsa-miR-1178 | NM_001050 | SSTR2 | 1 |
| hsa-miR-1181 | NM_001050 | SSTR2 | 1 |

|                        |       |   |
|------------------------|-------|---|
| hsa-miR-1182 NM_001050 | SSTR2 | 1 |
| hsa-miR-1226 NM_001050 | SSTR2 | 1 |
| hsa-miR-1227 NM_001050 | SSTR2 | 1 |
| hsa-miR-1228 NM_001050 | SSTR2 | 1 |
| hsa-miR-1228 NM_001050 | SSTR2 | 1 |
| hsa-miR-1229 NM_001050 | SSTR2 | 1 |
| hsa-miR-1233 NM_001050 | SSTR2 | 1 |
| hsa-miR-1236 NM_001050 | SSTR2 | 1 |
| hsa-miR-1204 NM_001050 | SSTR2 | 1 |
| hsa-miR-1205 NM_001050 | SSTR2 | 1 |
| hsa-miR-1207 NM_001050 | SSTR2 | 1 |
| hsa-miR-1287 NM_001050 | SSTR2 | 1 |
| hsa-miR-1291 NM_001050 | SSTR2 | 1 |
| hsa-miR-1299 NM_001050 | SSTR2 | 1 |
| hsa-miR-1303 NM_001050 | SSTR2 | 1 |
| hsa-miR-1304 NM_001050 | SSTR2 | 1 |
| hsa-miR-1256 NM_001050 | SSTR2 | 1 |
| hsa-miR-1257 NM_001050 | SSTR2 | 1 |
| hsa-miR-1257 NM_001050 | SSTR2 | 1 |
| hsa-miR-1268 NM_001050 | SSTR2 | 1 |
| hsa-miR-1270 NM_001050 | SSTR2 | 1 |
| hsa-miR-1275 NM_001050 | SSTR2 | 1 |
| hsa-miR-664a NM_001050 | SSTR2 | 1 |
| hsa-miR-513b NM_001050 | SSTR2 | 1 |
| hsa-miR-1914 NM_001050 | SSTR2 | 1 |
| hsa-miR-1915 NM_001050 | SSTR2 | 1 |
| hsa-miR-1972 NM_001050 | SSTR2 | 1 |
| hsa-miR-2115 NM_001050 | SSTR2 | 1 |
| hsa-miR-2276 NM_001050 | SSTR2 | 1 |
| hsa-miR-3116 NM_001050 | SSTR2 | 1 |
| hsa-miR-3121 NM_001050 | SSTR2 | 1 |
| hsa-miR-3126 NM_001050 | SSTR2 | 1 |
| hsa-miR-3126 NM_001050 | SSTR2 | 1 |
| hsa-miR-3127 NM_001050 | SSTR2 | 1 |
| hsa-miR-3130 NM_001050 | SSTR2 | 1 |
| hsa-miR-3134 NM_001050 | SSTR2 | 1 |
| hsa-miR-3135 NM_001050 | SSTR2 | 1 |
| hsa-miR-466 NM_001050  | SSTR2 | 1 |
| hsa-miR-3138 NM_001050 | SSTR2 | 1 |
| hsa-miR-3141 NM_001050 | SSTR2 | 1 |
| hsa-miR-3150 NM_001050 | SSTR2 | 1 |
| hsa-miR-3074 NM_001050 | SSTR2 | 1 |
| hsa-miR-3154 NM_001050 | SSTR2 | 1 |
| hsa-miR-3156 NM_001050 | SSTR2 | 1 |
| hsa-miR-3156 NM_001050 | SSTR2 | 1 |
| hsa-miR-3158 NM_001050 | SSTR2 | 1 |
| hsa-miR-3162 NM_001050 | SSTR2 | 1 |
| hsa-miR-3178 NM_001050 | SSTR2 | 1 |
| hsa-miR-3184 NM_001050 | SSTR2 | 1 |
| hsa-miR-3186 NM_001050 | SSTR2 | 1 |
| hsa-miR-3187 NM_001050 | SSTR2 | 1 |
| hsa-miR-320e NM_001050 | SSTR2 | 1 |
| hsa-miR-3192 NM_001050 | SSTR2 | 1 |
| hsa-miR-3192 NM_001050 | SSTR2 | 1 |
| hsa-miR-3194 NM_001050 | SSTR2 | 1 |
| hsa-miR-3198 NM_001050 | SSTR2 | 1 |
| hsa-miR-3198 NM_001050 | SSTR2 | 1 |
| hsa-miR-3199 NM_001050 | SSTR2 | 1 |
| hsa-miR-514b NM_001050 | SSTR2 | 1 |
| hsa-miR-4298 NM_001050 | SSTR2 | 1 |
| hsa-miR-4300 NM_001050 | SSTR2 | 1 |
| hsa-miR-4300 NM_001050 | SSTR2 | 1 |
| hsa-miR-4304 NM_001050 | SSTR2 | 1 |
| hsa-miR-4302 NM_001050 | SSTR2 | 1 |
| hsa-miR-4303 NM_001050 | SSTR2 | 1 |
| hsa-miR-4315 NM_001050 | SSTR2 | 1 |
| hsa-miR-4315 NM_001050 | SSTR2 | 1 |
| hsa-miR-4320 NM_001050 | SSTR2 | 1 |
| hsa-miR-4320 NM_001050 | SSTR2 | 1 |
| hsa-miR-4323 NM_001050 | SSTR2 | 1 |
| hsa-miR-4259 NM_001050 | SSTR2 | 1 |
| hsa-miR-4253 NM_001050 | SSTR2 | 1 |
| hsa-miR-4254 NM_001050 | SSTR2 | 1 |
| hsa-miR-4326 NM_001050 | SSTR2 | 1 |
| hsa-miR-4327 NM_001050 | SSTR2 | 1 |
| hsa-miR-4268 NM_001050 | SSTR2 | 1 |
| hsa-miR-4270 NM_001050 | SSTR2 | 1 |
| hsa-miR-4273 NM_001050 | SSTR2 | 1 |
| hsa-miR-4276 NM_001050 | SSTR2 | 1 |
| hsa-miR-4279 NM_001050 | SSTR2 | 1 |
| hsa-miR-4283 NM_001050 | SSTR2 | 1 |
| hsa-miR-4284 NM_001050 | SSTR2 | 1 |
| hsa-miR-500b NM_001050 | SSTR2 | 1 |
| hsa-miR-3614 NM_001050 | SSTR2 | 1 |
| hsa-miR-23c NM_001050  | SSTR2 | 1 |
| hsa-miR-3620 NM_001050 | SSTR2 | 1 |
| hsa-miR-3620 NM_001050 | SSTR2 | 1 |
| hsa-miR-3650 NM_001050 | SSTR2 | 1 |
| hsa-miR-3652 NM_001050 | SSTR2 | 1 |
| hsa-miR-3652 NM_001050 | SSTR2 | 1 |
| hsa-miR-3663 NM_001050 | SSTR2 | 1 |
| hsa-miR-3663 NM_001050 | SSTR2 | 1 |
| hsa-miR-3679 NM_001050 | SSTR2 | 1 |
| hsa-miR-3680 NM_001050 | SSTR2 | 1 |
| hsa-miR-3680 NM_001050 | SSTR2 | 1 |







|                        |       |            |
|------------------------|-------|------------|
| hsa-miR-6769 NM_001050 | SSTR2 | 1          |
| hsa-miR-6769 NM_001050 | SSTR2 | 1          |
| hsa-miR-6867 NM_001050 | SSTR2 | 1          |
| hsa-miR-6867 NM_001050 | SSTR2 | 1          |
| hsa-miR-6868 NM_001050 | SSTR2 | 1          |
| hsa-miR-6869 NM_001050 | SSTR2 | 1          |
| hsa-miR-6871 NM_001050 | SSTR2 | 1          |
| hsa-miR-6871 NM_001050 | SSTR2 | 1          |
| hsa-miR-6875 NM_001050 | SSTR2 | 1          |
| hsa-miR-6877 NM_001050 | SSTR2 | 1          |
| hsa-miR-6877 NM_001050 | SSTR2 | 1          |
| hsa-miR-6879 NM_001050 | SSTR2 | 1          |
| hsa-miR-6880 NM_001050 | SSTR2 | 1          |
| hsa-miR-6883 NM_001050 | SSTR2 | 1          |
| hsa-miR-6884 NM_001050 | SSTR2 | 1          |
| hsa-miR-6889 NM_001050 | SSTR2 | 1          |
| hsa-miR-6890 NM_001050 | SSTR2 | 1          |
| hsa-miR-6891 NM_001050 | SSTR2 | 1          |
| hsa-miR-6891 NM_001050 | SSTR2 | 1          |
| hsa-miR-6892 NM_001050 | SSTR2 | 1          |
| hsa-miR-6892 NM_001050 | SSTR2 | 1          |
| hsa-miR-6893 NM_001050 | SSTR2 | 1          |
| hsa-miR-6895 NM_001050 | SSTR2 | 1          |
| hsa-miR-7107 NM_001050 | SSTR2 | 1          |
| hsa-miR-7108 NM_001050 | SSTR2 | 1          |
| hsa-miR-7109 NM_001050 | SSTR2 | 1          |
| hsa-miR-7109 NM_001050 | SSTR2 | 1          |
| hsa-miR-7110 NM_001050 | SSTR2 | 1          |
| hsa-miR-7110 NM_001050 | SSTR2 | 1          |
| hsa-miR-7111 NM_001050 | SSTR2 | 1          |
| hsa-miR-7112 NM_001050 | SSTR2 | 1          |
| hsa-miR-7113 NM_001050 | SSTR2 | 1          |
| hsa-miR-7150 NM_001050 | SSTR2 | 1          |
| hsa-miR-7150 NM_001050 | SSTR2 | 1          |
| hsa-miR-7151 NM_001050 | SSTR2 | 1          |
| hsa-miR-7151 NM_001050 | SSTR2 | 1          |
| hsa-miR-7151 NM_001050 | SSTR2 | 1          |
| hsa-miR-7152 NM_001050 | SSTR2 | 1          |
| hsa-miR-7152 NM_001050 | SSTR2 | 1          |
| hsa-miR-7156 NM_001050 | SSTR2 | 1          |
| hsa-miR-7157 NM_001050 | SSTR2 | 1          |
| hsa-miR-7160 NM_001050 | SSTR2 | 1          |
| hsa-miR-7160 NM_001050 | SSTR2 | 1          |
| hsa-miR-7160 NM_001050 | SSTR2 | 1          |
| hsa-miR-7843 NM_001050 | SSTR2 | 1          |
| hsa-miR-7843 NM_001050 | SSTR2 | 1          |
| hsa-miR-1273 NM_001050 | SSTR2 | 1          |
| hsa-miR-7847 NM_001050 | SSTR2 | 1          |
| hsa-miR-7849 NM_001050 | SSTR2 | 1          |
| hsa-miR-7974 NM_001050 | SSTR2 | 1          |
| hsa-miR-7974 NM_001050 | SSTR2 | 1          |
| hsa-miR-7977 NM_001050 | SSTR2 | 1          |
| hsa-miR-8053 NM_001050 | SSTR2 | 1          |
| hsa-miR-8057 NM_001050 | SSTR2 | 1          |
| hsa-miR-8058 NM_001050 | SSTR2 | 1          |
| hsa-miR-8072 NM_001050 | SSTR2 | 1          |
| hsa-miR-8073 NM_001050 | SSTR2 | 1          |
| hsa-miR-8078 NM_001050 | SSTR2 | 1          |
| hsa-miR-8079 NM_001050 | SSTR2 | 1          |
| hsa-miR-8082 NM_001050 | SSTR2 | 1          |
| hsa-miR-9718 NM_001050 | SSTR2 | 1          |
| hsa-miR-9718 NM_001050 | SSTR2 | 1          |
| hsa-miR-9900 NM_001050 | SSTR2 | 1          |
| hsa-miR-9901 NM_001050 | SSTR2 | 1          |
| hsa-miR-9986 NM_001050 | SSTR2 | 1          |
| hsa-miR-1022 NM_001050 | SSTR2 | 1          |
| hsa-miR-1039 NM_001050 | SSTR2 | 1          |
| hsa-miR-1052 NM_001050 | SSTR2 | 1          |
| hsa-miR-1052 NM_001050 | SSTR2 | 1          |
| hsa-miR-1139 NM_001050 | SSTR2 | 1          |
| hsa-miR-3059 NM_001050 | SSTR2 | 1          |
| hsa-miR-3059 NM_001050 | SSTR2 | 1          |
| hsa-miR-6529 NM_001050 | SSTR2 | 1          |
| hsa-miR-6529 NM_001050 | SSTR2 | 1          |
| hsa-miR-1211 NM_001050 | SSTR2 | 1          |
| hsa-miR-1211 NM_001050 | SSTR2 | 1          |
| hsa-miR-1212 NM_001050 | SSTR2 | 1          |
| hsa-miR-552- NM_001067 | TOP2A | 0.95384615 |
| hsa-miR-4736 NM_001067 | TOP2A | 0.95384615 |
| hsa-miR-4802 NM_001067 | TOP2A | 0.95384615 |
| hsa-miR-198 NM_001067  | TOP2A | 0.96153846 |
| hsa-miR-149- NM_001067 | TOP2A | 0.96153846 |
| hsa-miR-365b NM_001067 | TOP2A | 0.96153846 |
| hsa-miR-330- NM_001067 | TOP2A | 0.96153846 |
| hsa-miR-523- NM_001067 | TOP2A | 0.96153846 |
| hsa-miR-670- NM_001067 | TOP2A | 0.96153846 |
| hsa-miR-3074 NM_001067 | TOP2A | 0.96153846 |
| hsa-miR-3154 NM_001067 | TOP2A | 0.96153846 |
| hsa-miR-3178 NM_001067 | TOP2A | 0.96153846 |



|               |            |       |            |
|---------------|------------|-------|------------|
| hsa-miR-378c  | NM_001067  | TOP2A | 0.96153846 |
| hsa-miR-3926  | NM_001067  | TOP2A | 0.96153846 |
| hsa-miR-464C  | NM_001067  | TOP2A | 0.96153846 |
| hsa-miR-472E  | NM_001067  | TOP2A | 0.96153846 |
| hsa-miR-475C  | NM_001067  | TOP2A | 0.96153846 |
| hsa-miR-609C  | NM_001067  | TOP2A | 0.96153846 |
| hsa-miR-6735  | NM_001067  | TOP2A | 0.96153846 |
| hsa-miR-6738  | NM_001067  | TOP2A | 0.96153846 |
| hsa-miR-6794  | NM_001067  | TOP2A | 0.96153846 |
| hsa-miR-6798  | NM_001067  | TOP2A | 0.96153846 |
| hsa-miR-6799  | NM_001067  | TOP2A | 0.96153846 |
| hsa-miR-6882  | NM_001067  | TOP2A | 0.96153846 |
| hsa-miR-7106  | NM_001067  | TOP2A | 0.96153846 |
| hsa-miR-7854  | NM_001067  | TOP2A | 0.96153846 |
| hsa-miR-1035  | NM_001067  | TOP2A | 0.96153846 |
| hsa-miR-580-  | NM_001067  | TOP2A | 0.97435897 |
| hsa-miR-1208  | NM_001067  | TOP2A | 0.97435897 |
| hsa-miR-4717  | NM_001067  | TOP2A | 0.97435897 |
| hsa-miR-6718  | NM_001067  | TOP2A | 0.97435897 |
| hsa-miR-21-3j | NM_001067  | TOP2A | 1          |
| hsa-miR-31-5j | NM_001067  | TOP2A | 1          |
| hsa-let-7g-5p | NM_001067  | TOP2A | 1          |
| hsa-miR-137-  | NM_001067  | TOP2A | 1          |
| hsa-miR-150-  | NM_001067  | TOP2A | 1          |
| hsa-miR-450a  | NM_001067  | TOP2A | 1          |
| hsa-miR-572   | NM_001067  | TOP2A | 1          |
| hsa-miR-603   | NM_001067  | TOP2A | 1          |
| hsa-miR-885-  | NM_001067  | TOP2A | 1          |
| hsa-miR-936   | NM_001067  | TOP2A | 1          |
| hsa-miR-939-  | NM_001067  | TOP2A | 1          |
| hsa-miR-1178  | NM_001067  | TOP2A | 1          |
| hsa-miR-1207  | NM_001067  | TOP2A | 1          |
| hsa-miR-1207  | NM_001067  | TOP2A | 1          |
| hsa-miR-312C  | NM_001067  | TOP2A | 1          |
| hsa-miR-315C  | NM_001067  | TOP2A | 1          |
| hsa-miR-3178  | NM_001067  | TOP2A | 1          |
| hsa-miR-319C  | NM_001067  | TOP2A | 1          |
| hsa-miR-3202  | NM_001067  | TOP2A | 1          |
| hsa-miR-4253  | NM_001067  | TOP2A | 1          |
| hsa-miR-378f  | NM_001067  | TOP2A | 1          |
| hsa-miR-4494  | NM_001067  | TOP2A | 1          |
| hsa-miR-4677  | NM_001067  | TOP2A | 1          |
| hsa-miR-4687  | NM_001067  | TOP2A | 1          |
| hsa-miR-4688  | NM_001067  | TOP2A | 1          |
| hsa-miR-4723  | NM_001067  | TOP2A | 1          |
| hsa-miR-4743  | NM_001067  | TOP2A | 1          |
| hsa-miR-4756  | NM_001067  | TOP2A | 1          |
| hsa-miR-4771  | NM_001067  | TOP2A | 1          |
| hsa-miR-4773  | NM_001067  | TOP2A | 1          |
| hsa-miR-4788  | NM_001067  | TOP2A | 1          |
| hsa-miR-4788  | NM_001067  | TOP2A | 1          |
| hsa-miR-4793  | NM_001067  | TOP2A | 1          |
| hsa-miR-5194  | NM_001067  | TOP2A | 1          |
| hsa-miR-6086  | NM_001067  | TOP2A | 1          |
| hsa-miR-6125  | NM_001067  | TOP2A | 1          |
| hsa-miR-651C  | NM_001067  | TOP2A | 1          |
| hsa-miR-6716  | NM_001067  | TOP2A | 1          |
| hsa-miR-6718  | NM_001067  | TOP2A | 1          |
| hsa-miR-6728  | NM_001067  | TOP2A | 1          |
| hsa-miR-6743  | NM_001067  | TOP2A | 1          |
| hsa-miR-6758  | NM_001067  | TOP2A | 1          |
| hsa-miR-6765  | NM_001067  | TOP2A | 1          |
| hsa-miR-6794  | NM_001067  | TOP2A | 1          |
| hsa-miR-6801  | NM_001067  | TOP2A | 1          |
| hsa-miR-681C  | NM_001067  | TOP2A | 1          |
| hsa-miR-6822  | NM_001067  | TOP2A | 1          |
| hsa-miR-6827  | NM_001067  | TOP2A | 1          |
| hsa-miR-6846  | NM_001067  | TOP2A | 1          |
| hsa-miR-6851  | NM_001067  | TOP2A | 1          |
| hsa-miR-6865  | NM_001067  | TOP2A | 1          |
| hsa-miR-7106  | NM_001067  | TOP2A | 1          |
| hsa-miR-7976  | NM_001067  | TOP2A | 1          |
| hsa-miR-8065  | NM_001067  | TOP2A | 1          |
| hsa-miR-8065  | NM_001067  | TOP2A | 1          |
| hsa-miR-8085  | NM_001067  | TOP2A | 1          |
| hsa-miR-1135  | NM_001067  | TOP2A | 1          |
| hsa-miR-6525  | NM_001067  | TOP2A | 1          |
| hsa-miR-1211  | NM_001067  | TOP2A | 1          |
| hsa-miR-938   | NM_017935  | BANK1 | 0.96153846 |
| hsa-miR-3925  | NM_017935  | BANK1 | 0.96153846 |
| hsa-miR-3925  | NM_0010839 | BANK1 | 0.96153846 |
| hsa-miR-3925  | NM_0011275 | BANK1 | 0.96153846 |
| hsa-miR-4425  | NM_0011275 | BANK1 | 0.96153846 |
| hsa-miR-5591  | NM_0011275 | BANK1 | 0.97435897 |
| hsa-miR-6876  | NM_017935  | BANK1 | 0.98076923 |
| hsa-miR-6876  | NM_0010839 | BANK1 | 0.98076923 |
| hsa-miR-6876  | NM_0011275 | BANK1 | 0.98076923 |
| hsa-miR-214-  | NM_017935  | BANK1 | 1          |
| hsa-miR-27b-  | NM_017935  | BANK1 | 1          |
| hsa-miR-185-  | NM_017935  | BANK1 | 1          |
| hsa-miR-520e  | NM_017935  | BANK1 | 1          |
| hsa-miR-515-  | NM_017935  | BANK1 | 1          |
| hsa-miR-622   | NM_017935  | BANK1 | 1          |
| hsa-miR-411-  | NM_017935  | BANK1 | 1          |

|                          |       |   |
|--------------------------|-------|---|
| hsa-miR-887- NM_017935   | BANK1 | 1 |
| hsa-miR-509- NM_017935   | BANK1 | 1 |
| hsa-miR-933 NM_017935    | BANK1 | 1 |
| hsa-miR-1285 NM_017935   | BANK1 | 1 |
| hsa-miR-1256 NM_017935   | BANK1 | 1 |
| hsa-miR-3121 NM_017935   | BANK1 | 1 |
| hsa-miR-323b NM_017935   | BANK1 | 1 |
| hsa-miR-514b NM_017935   | BANK1 | 1 |
| hsa-miR-433C NM_017935   | BANK1 | 1 |
| hsa-miR-3691 NM_017935   | BANK1 | 1 |
| hsa-miR-451C NM_017935   | BANK1 | 1 |
| hsa-miR-4635 NM_017935   | BANK1 | 1 |
| hsa-miR-4655 NM_017935   | BANK1 | 1 |
| hsa-miR-4687 NM_017935   | BANK1 | 1 |
| hsa-miR-4728 NM_017935   | BANK1 | 1 |
| hsa-miR-474C NM_017935   | BANK1 | 1 |
| hsa-miR-4774 NM_017935   | BANK1 | 1 |
| hsa-miR-478C NM_017935   | BANK1 | 1 |
| hsa-miR-4781 NM_017935   | BANK1 | 1 |
| hsa-miR-2467 NM_017935   | BANK1 | 1 |
| hsa-miR-651C NM_017935   | BANK1 | 1 |
| hsa-miR-6751 NM_017935   | BANK1 | 1 |
| hsa-miR-6755 NM_017935   | BANK1 | 1 |
| hsa-miR-6795 NM_017935   | BANK1 | 1 |
| hsa-miR-6817 NM_017935   | BANK1 | 1 |
| hsa-miR-7152 NM_017935   | BANK1 | 1 |
| hsa-miR-9903 NM_017935   | BANK1 | 1 |
| hsa-miR-93-5j NM_0010839 | BANK1 | 1 |
| hsa-miR-103a NM_0010839  | BANK1 | 1 |
| hsa-miR-214- NM_0010839  | BANK1 | 1 |
| hsa-miR-224- NM_0010839  | BANK1 | 1 |
| hsa-miR-27b- NM_0010839  | BANK1 | 1 |
| hsa-miR-185- NM_0010839  | BANK1 | 1 |
| hsa-miR-345- NM_0010839  | BANK1 | 1 |
| hsa-miR-520e NM_0010839  | BANK1 | 1 |
| hsa-miR-622 NM_0010839   | BANK1 | 1 |
| hsa-miR-637 NM_0010839   | BANK1 | 1 |
| hsa-miR-645 NM_0010839   | BANK1 | 1 |
| hsa-miR-411- NM_0010839  | BANK1 | 1 |
| hsa-miR-874- NM_0010839  | BANK1 | 1 |
| hsa-miR-887- NM_0010839  | BANK1 | 1 |
| hsa-miR-509- NM_0010839  | BANK1 | 1 |
| hsa-miR-933 NM_0010839   | BANK1 | 1 |
| hsa-miR-938 NM_0010839   | BANK1 | 1 |
| hsa-miR-1207 NM_0010839  | BANK1 | 1 |
| hsa-miR-1285 NM_0010839  | BANK1 | 1 |
| hsa-miR-1256 NM_0010839  | BANK1 | 1 |
| hsa-miR-3121 NM_0010839  | BANK1 | 1 |
| hsa-miR-313C NM_0010839  | BANK1 | 1 |
| hsa-miR-323b NM_0010839  | BANK1 | 1 |
| hsa-miR-514b NM_0010839  | BANK1 | 1 |
| hsa-miR-433C NM_0010839  | BANK1 | 1 |
| hsa-miR-3654 NM_0010839  | BANK1 | 1 |
| hsa-miR-3905 NM_0010839  | BANK1 | 1 |
| hsa-miR-3944 NM_0010839  | BANK1 | 1 |
| hsa-miR-4465 NM_0010839  | BANK1 | 1 |
| hsa-miR-4488 NM_0010839  | BANK1 | 1 |
| hsa-miR-451C NM_0010839  | BANK1 | 1 |
| hsa-miR-4635 NM_0010839  | BANK1 | 1 |
| hsa-miR-4655 NM_0010839  | BANK1 | 1 |
| hsa-miR-4687 NM_0010839  | BANK1 | 1 |
| hsa-miR-469C NM_0010839  | BANK1 | 1 |
| hsa-miR-4715 NM_0010839  | BANK1 | 1 |
| hsa-miR-4728 NM_0010839  | BANK1 | 1 |
| hsa-miR-4728 NM_0010839  | BANK1 | 1 |
| hsa-miR-3064 NM_0010839  | BANK1 | 1 |
| hsa-miR-474C NM_0010839  | BANK1 | 1 |
| hsa-miR-4748 NM_0010839  | BANK1 | 1 |
| hsa-miR-4758 NM_0010839  | BANK1 | 1 |
| hsa-miR-4774 NM_0010839  | BANK1 | 1 |
| hsa-miR-478C NM_0010839  | BANK1 | 1 |
| hsa-miR-4781 NM_0010839  | BANK1 | 1 |
| hsa-miR-2467 NM_0010839  | BANK1 | 1 |
| hsa-miR-5087 NM_0010839  | BANK1 | 1 |
| hsa-miR-5587 NM_0010839  | BANK1 | 1 |
| hsa-miR-6085 NM_0010839  | BANK1 | 1 |
| hsa-miR-651C NM_0010839  | BANK1 | 1 |
| hsa-miR-673C NM_0010839  | BANK1 | 1 |
| hsa-miR-6751 NM_0010839  | BANK1 | 1 |
| hsa-miR-6755 NM_0010839  | BANK1 | 1 |
| hsa-miR-6773 NM_0010839  | BANK1 | 1 |
| hsa-miR-6777 NM_0010839  | BANK1 | 1 |
| hsa-miR-6795 NM_0010839  | BANK1 | 1 |
| hsa-miR-6817 NM_0010839  | BANK1 | 1 |
| hsa-miR-6877 NM_0010839  | BANK1 | 1 |
| hsa-miR-7152 NM_0010839  | BANK1 | 1 |
| hsa-miR-9903 NM_0010839  | BANK1 | 1 |
| hsa-let-7f-5p NM_0011275 | BANK1 | 1 |
| hsa-miR-214- NM_0011275  | BANK1 | 1 |
| hsa-miR-27b- NM_0011275  | BANK1 | 1 |
| hsa-miR-185- NM_0011275  | BANK1 | 1 |
| hsa-miR-219a NM_0011275  | BANK1 | 1 |
| hsa-miR-339- NM_0011275  | BANK1 | 1 |
| hsa-miR-510- NM_0011275  | BANK1 | 1 |

|                               |            |
|-------------------------------|------------|
| hsa-miR-622 NM_0011275 BANK1  | 1          |
| hsa-miR-411-NM_0011275 BANK1  | 1          |
| hsa-miR-1224NM_0011275 BANK1  | 1          |
| hsa-miR-320cNM_0011275 BANK1  | 1          |
| hsa-miR-889-NM_0011275 BANK1  | 1          |
| hsa-miR-509-NM_0011275 BANK1  | 1          |
| hsa-miR-933 NM_0011275 BANK1  | 1          |
| hsa-miR-1285NM_0011275 BANK1  | 1          |
| hsa-miR-1295NM_0011275 BANK1  | 1          |
| hsa-miR-1256NM_0011275 BANK1  | 1          |
| hsa-miR-320dNM_0011275 BANK1  | 1          |
| hsa-miR-2276NM_0011275 BANK1  | 1          |
| hsa-miR-3121NM_0011275 BANK1  | 1          |
| hsa-miR-3135NM_0011275 BANK1  | 1          |
| hsa-miR-3150NM_0011275 BANK1  | 1          |
| hsa-miR-323bNM_0011275 BANK1  | 1          |
| hsa-miR-514bNM_0011275 BANK1  | 1          |
| hsa-miR-4266NM_0011275 BANK1  | 1          |
| hsa-miR-3649NM_0011275 BANK1  | 1          |
| hsa-miR-3666NM_0011275 BANK1  | 1          |
| hsa-miR-3691NM_0011275 BANK1  | 1          |
| hsa-miR-4510NM_0011275 BANK1  | 1          |
| hsa-miR-4635NM_0011275 BANK1  | 1          |
| hsa-miR-4670NM_0011275 BANK1  | 1          |
| hsa-miR-4687NM_0011275 BANK1  | 1          |
| hsa-miR-4691NM_0011275 BANK1  | 1          |
| hsa-miR-4700NM_0011275 BANK1  | 1          |
| hsa-miR-4740NM_0011275 BANK1  | 1          |
| hsa-miR-4766NM_0011275 BANK1  | 1          |
| hsa-miR-4774NM_0011275 BANK1  | 1          |
| hsa-miR-4780NM_0011275 BANK1  | 1          |
| hsa-miR-4781NM_0011275 BANK1  | 1          |
| hsa-miR-4788NM_0011275 BANK1  | 1          |
| hsa-miR-5093NM_0011275 BANK1  | 1          |
| hsa-miR-6510NM_0011275 BANK1  | 1          |
| hsa-miR-6751NM_0011275 BANK1  | 1          |
| hsa-miR-6790NM_0011275 BANK1  | 1          |
| hsa-miR-6799NM_0011275 BANK1  | 1          |
| hsa-miR-6807NM_0011275 BANK1  | 1          |
| hsa-miR-6856NM_0011275 BANK1  | 1          |
| hsa-miR-6884NM_0011275 BANK1  | 1          |
| hsa-miR-7106NM_0011275 BANK1  | 1          |
| hsa-miR-7856NM_0011275 BANK1  | 1          |
| hsa-miR-6804NM_0012618 TMC5   | 0.95384615 |
| hsa-miR-6804NM_0013081 TMC5   | 0.95384615 |
| hsa-miR-6804NM_024780 TMC5    | 0.95384615 |
| hsa-miR-212-NM_0012618 TMC5   | 0.96153846 |
| hsa-miR-302bNM_0012618 TMC5   | 0.96153846 |
| hsa-miR-2113NM_0012618 TMC5   | 0.96153846 |
| hsa-miR-1227NM_0012618 TMC5   | 0.96153846 |
| hsa-miR-1915NM_0012618 TMC5   | 0.96153846 |
| hsa-miR-4769NM_0012618 TMC5   | 0.96153846 |
| hsa-miR-6819NM_0012618 TMC5   | 0.96153846 |
| hsa-miR-302bNM_0013081 TMC5   | 0.96153846 |
| hsa-miR-1227NM_0013081 TMC5   | 0.96153846 |
| hsa-miR-4769NM_0013081 TMC5   | 0.96153846 |
| hsa-miR-6819NM_0013081 TMC5   | 0.96153846 |
| hsa-miR-212-NM_024780 TMC5    | 0.96153846 |
| hsa-miR-302bNM_024780 TMC5    | 0.96153846 |
| hsa-miR-519dNM_024780 TMC5    | 0.96153846 |
| hsa-miR-2113NM_024780 TMC5    | 0.96153846 |
| hsa-miR-943 NM_024780 TMC5    | 0.96153846 |
| hsa-miR-1227NM_024780 TMC5    | 0.96153846 |
| hsa-miR-1915NM_024780 TMC5    | 0.96153846 |
| hsa-miR-4769NM_024780 TMC5    | 0.96153846 |
| hsa-miR-6819NM_024780 TMC5    | 0.96153846 |
| hsa-miR-302bNM_0011052 TMC5   | 0.96153846 |
| hsa-miR-4769NM_0011052 TMC5   | 0.96153846 |
| hsa-miR-302bNM_0011052 TMC5   | 0.96153846 |
| hsa-miR-4769NM_0011052 TMC5   | 0.96153846 |
| hsa-miR-512-NM_0012618 TMC5   | 0.97435897 |
| hsa-miR-3615NM_0012618 TMC5   | 0.97435897 |
| hsa-miR-6778NM_0012618 TMC5   | 0.97435897 |
| hsa-miR-6846NM_0012618 TMC5   | 0.97435897 |
| hsa-miR-6778NM_0013081 TMC5   | 0.97435897 |
| hsa-miR-6846NM_0013081 TMC5   | 0.97435897 |
| hsa-miR-3144NM_024780 TMC5    | 0.97435897 |
| hsa-miR-3615NM_024780 TMC5    | 0.97435897 |
| hsa-miR-6727NM_024780 TMC5    | 0.97435897 |
| hsa-miR-6846NM_024780 TMC5    | 0.97435897 |
| hsa-miR-631 NM_0012618 TMC5   | 0.97435897 |
| hsa-miR-631 NM_024780 TMC5    | 0.97435897 |
| hsa-miR-6817NM_0012618 TMC5   | 0.98076923 |
| hsa-miR-6817NM_0013081 TMC5   | 0.98076923 |
| hsa-miR-6817NM_024780 TMC5    | 0.98076923 |
| hsa-miR-6751NM_0013081 TMC5   | 0.99145299 |
| hsa-let-7b-3p NM_0012618 TMC5 | 1          |
| hsa-miR-17-3jNM_0012618 TMC5  | 1          |
| hsa-miR-25-3jNM_0012618 TMC5  | 1          |
| hsa-miR-92a-NM_0012618 TMC5   | 1          |
| hsa-miR-93-3jNM_0012618 TMC5  | 1          |
| hsa-miR-129-NM_0012618 TMC5   | 1          |
| hsa-miR-34a-NM_0012618 TMC5   | 1          |
| hsa-miR-200bNM_0012618 TMC5   | 1          |

|               |            |      |   |
|---------------|------------|------|---|
| hsa-miR-200b  | NM_0012618 | TMC5 | 1 |
| hsa-let-7i-5p | NM_0012618 | TMC5 | 1 |
| hsa-miR-140-  | NM_0012618 | TMC5 | 1 |
| hsa-miR-143-  | NM_0012618 | TMC5 | 1 |
| hsa-miR-125b  | NM_0012618 | TMC5 | 1 |
| hsa-miR-134-  | NM_0012618 | TMC5 | 1 |
| hsa-miR-149-  | NM_0012618 | TMC5 | 1 |
| hsa-miR-154-  | NM_0012618 | TMC5 | 1 |
| hsa-miR-320a  | NM_0012618 | TMC5 | 1 |
| hsa-miR-320a  | NM_0012618 | TMC5 | 1 |
| hsa-miR-299-  | NM_0012618 | TMC5 | 1 |
| hsa-miR-363-  | NM_0012618 | TMC5 | 1 |
| hsa-miR-365b  | NM_0012618 | TMC5 | 1 |
| hsa-miR-370-  | NM_0012618 | TMC5 | 1 |
| hsa-miR-376a  | NM_0012618 | TMC5 | 1 |
| hsa-miR-339-  | NM_0012618 | TMC5 | 1 |
| hsa-miR-339-  | NM_0012618 | TMC5 | 1 |
| hsa-miR-196b  | NM_0012618 | TMC5 | 1 |
| hsa-miR-423-  | NM_0012618 | TMC5 | 1 |
| hsa-miR-484   | NM_0012618 | TMC5 | 1 |
| hsa-miR-484   | NM_0012618 | TMC5 | 1 |
| hsa-miR-486-  | NM_0012618 | TMC5 | 1 |
| hsa-miR-489-  | NM_0012618 | TMC5 | 1 |
| hsa-miR-202-  | NM_0012618 | TMC5 | 1 |
| hsa-miR-202-  | NM_0012618 | TMC5 | 1 |
| hsa-miR-494-  | NM_0012618 | TMC5 | 1 |
| hsa-miR-193b  | NM_0012618 | TMC5 | 1 |
| hsa-miR-181d  | NM_0012618 | TMC5 | 1 |
| hsa-miR-519e  | NM_0012618 | TMC5 | 1 |
| hsa-miR-520b  | NM_0012618 | TMC5 | 1 |
| hsa-miR-520g  | NM_0012618 | TMC5 | 1 |
| hsa-miR-519a  | NM_0012618 | TMC5 | 1 |
| hsa-miR-503-  | NM_0012618 | TMC5 | 1 |
| hsa-miR-376a  | NM_0012618 | TMC5 | 1 |
| hsa-miR-555   | NM_0012618 | TMC5 | 1 |
| hsa-miR-593-  | NM_0012618 | TMC5 | 1 |
| hsa-miR-608   | NM_0012618 | TMC5 | 1 |
| hsa-miR-623   | NM_0012618 | TMC5 | 1 |
| hsa-miR-639   | NM_0012618 | TMC5 | 1 |
| hsa-miR-639   | NM_0012618 | TMC5 | 1 |
| hsa-miR-645   | NM_0012618 | TMC5 | 1 |
| hsa-miR-645   | NM_0012618 | TMC5 | 1 |
| hsa-miR-449b  | NM_0012618 | TMC5 | 1 |
| hsa-miR-659-  | NM_0012618 | TMC5 | 1 |
| hsa-miR-660-  | NM_0012618 | TMC5 | 1 |
| hsa-miR-660-  | NM_0012618 | TMC5 | 1 |
| hsa-miR-542-  | NM_0012618 | TMC5 | 1 |
| hsa-miR-1224  | NM_0012618 | TMC5 | 1 |
| hsa-miR-320b  | NM_0012618 | TMC5 | 1 |
| hsa-miR-1468  | NM_0012618 | TMC5 | 1 |
| hsa-miR-1271  | NM_0012618 | TMC5 | 1 |
| hsa-miR-449c  | NM_0012618 | TMC5 | 1 |
| hsa-miR-769-  | NM_0012618 | TMC5 | 1 |
| hsa-miR-892b  | NM_0012618 | TMC5 | 1 |
| hsa-miR-877-  | NM_0012618 | TMC5 | 1 |
| hsa-miR-933   | NM_0012618 | TMC5 | 1 |
| hsa-miR-937-  | NM_0012618 | TMC5 | 1 |
| hsa-miR-939-  | NM_0012618 | TMC5 | 1 |
| hsa-miR-940   | NM_0012618 | TMC5 | 1 |
| hsa-miR-1184  | NM_0012618 | TMC5 | 1 |
| hsa-miR-1237  | NM_0012618 | TMC5 | 1 |
| hsa-miR-120c  | NM_0012618 | TMC5 | 1 |
| hsa-miR-1208  | NM_0012618 | TMC5 | 1 |
| hsa-miR-1303  | NM_0012618 | TMC5 | 1 |
| hsa-miR-1304  | NM_0012618 | TMC5 | 1 |
| hsa-miR-1261  | NM_0012618 | TMC5 | 1 |
| hsa-miR-548h  | NM_0012618 | TMC5 | 1 |
| hsa-miR-1292  | NM_0012618 | TMC5 | 1 |
| hsa-miR-1292  | NM_0012618 | TMC5 | 1 |
| hsa-miR-664a  | NM_0012618 | TMC5 | 1 |
| hsa-miR-1306  | NM_0012618 | TMC5 | 1 |
| hsa-miR-1535  | NM_0012618 | TMC5 | 1 |
| hsa-miR-1905  | NM_0012618 | TMC5 | 1 |
| hsa-miR-2116  | NM_0012618 | TMC5 | 1 |
| hsa-miR-2276  | NM_0012618 | TMC5 | 1 |
| hsa-miR-2682  | NM_0012618 | TMC5 | 1 |
| hsa-miR-2861  | NM_0012618 | TMC5 | 1 |
| hsa-miR-312c  | NM_0012618 | TMC5 | 1 |
| hsa-miR-3127  | NM_0012618 | TMC5 | 1 |
| hsa-miR-314c  | NM_0012618 | TMC5 | 1 |
| hsa-miR-548u  | NM_0012618 | TMC5 | 1 |
| hsa-miR-3144  | NM_0012618 | TMC5 | 1 |
| hsa-miR-3151  | NM_0012618 | TMC5 | 1 |
| hsa-miR-3155  | NM_0012618 | TMC5 | 1 |
| hsa-miR-3183  | NM_0012618 | TMC5 | 1 |
| hsa-miR-3184  | NM_0012618 | TMC5 | 1 |
| hsa-miR-3192  | NM_0012618 | TMC5 | 1 |
| hsa-miR-4294  | NM_0012618 | TMC5 | 1 |
| hsa-miR-4308  | NM_0012618 | TMC5 | 1 |
| hsa-miR-426c  | NM_0012618 | TMC5 | 1 |
| hsa-miR-4326  | NM_0012618 | TMC5 | 1 |
| hsa-miR-4274  | NM_0012618 | TMC5 | 1 |
| hsa-miR-4277  | NM_0012618 | TMC5 | 1 |
| hsa-miR-23c   | NM_0012618 | TMC5 | 1 |

|                              |   |
|------------------------------|---|
| hsa-miR-362C NM_0012618 TMC5 | 1 |
| hsa-miR-3622 NM_0012618 TMC5 | 1 |
| hsa-miR-3655 NM_0012618 TMC5 | 1 |
| hsa-miR-3672 NM_0012618 TMC5 | 1 |
| hsa-miR-3689 NM_0012618 TMC5 | 1 |
| hsa-miR-315G NM_0012618 TMC5 | 1 |
| hsa-miR-642b NM_0012618 TMC5 | 1 |
| hsa-miR-4433 NM_0012618 TMC5 | 1 |
| hsa-miR-4433 NM_0012618 TMC5 | 1 |
| hsa-miR-4437 NM_0012618 TMC5 | 1 |
| hsa-miR-4443 NM_0012618 TMC5 | 1 |
| hsa-miR-4446 NM_0012618 TMC5 | 1 |
| hsa-miR-4452 NM_0012618 TMC5 | 1 |
| hsa-miR-4458 NM_0012618 TMC5 | 1 |
| hsa-miR-3135 NM_0012618 TMC5 | 1 |
| hsa-miR-4462 NM_0012618 TMC5 | 1 |
| hsa-miR-4472 NM_0012618 TMC5 | 1 |
| hsa-miR-4487 NM_0012618 TMC5 | 1 |
| hsa-miR-4493 NM_0012618 TMC5 | 1 |
| hsa-miR-4505 NM_0012618 TMC5 | 1 |
| hsa-miR-4507 NM_0012618 TMC5 | 1 |
| hsa-miR-4512 NM_0012618 TMC5 | 1 |
| hsa-miR-4512 NM_0012618 TMC5 | 1 |
| hsa-miR-4533 NM_0012618 TMC5 | 1 |
| hsa-miR-1587 NM_0012618 TMC5 | 1 |
| hsa-miR-4537 NM_0012618 TMC5 | 1 |
| hsa-miR-4641 NM_0012618 TMC5 | 1 |
| hsa-miR-4676 NM_0012618 TMC5 | 1 |
| hsa-miR-4685 NM_0012618 TMC5 | 1 |
| hsa-miR-4689 NM_0012618 TMC5 | 1 |
| hsa-miR-4695 NM_0012618 TMC5 | 1 |
| hsa-miR-4716 NM_0012618 TMC5 | 1 |
| hsa-miR-3529 NM_0012618 TMC5 | 1 |
| hsa-miR-4725 NM_0012618 TMC5 | 1 |
| hsa-miR-4726 NM_0012618 TMC5 | 1 |
| hsa-miR-473G NM_0012618 TMC5 | 1 |
| hsa-miR-4733 NM_0012618 TMC5 | 1 |
| hsa-miR-3064 NM_0012618 TMC5 | 1 |
| hsa-miR-3064 NM_0012618 TMC5 | 1 |
| hsa-miR-474C NM_0012618 TMC5 | 1 |
| hsa-miR-4748 NM_0012618 TMC5 | 1 |
| hsa-miR-475C NM_0012618 TMC5 | 1 |
| hsa-miR-4753 NM_0012618 TMC5 | 1 |
| hsa-miR-4757 NM_0012618 TMC5 | 1 |
| hsa-miR-4763 NM_0012618 TMC5 | 1 |
| hsa-miR-4767 NM_0012618 TMC5 | 1 |
| hsa-miR-4772 NM_0012618 TMC5 | 1 |
| hsa-miR-4774 NM_0012618 TMC5 | 1 |
| hsa-miR-2467 NM_0012618 TMC5 | 1 |
| hsa-miR-5003 NM_0012618 TMC5 | 1 |
| hsa-miR-5003 NM_0012618 TMC5 | 1 |
| hsa-miR-5004 NM_0012618 TMC5 | 1 |
| hsa-miR-5006 NM_0012618 TMC5 | 1 |
| hsa-miR-5006 NM_0012618 TMC5 | 1 |
| hsa-miR-5007 NM_0012618 TMC5 | 1 |
| hsa-miR-519G NM_0012618 TMC5 | 1 |
| hsa-miR-5195 NM_0012618 TMC5 | 1 |
| hsa-miR-5572 NM_0012618 TMC5 | 1 |
| hsa-miR-548a NM_0012618 TMC5 | 1 |
| hsa-miR-664b NM_0012618 TMC5 | 1 |
| hsa-miR-1295 NM_0012618 TMC5 | 1 |
| hsa-miR-5588 NM_0012618 TMC5 | 1 |
| hsa-miR-5589 NM_0012618 TMC5 | 1 |
| hsa-miR-5589 NM_0012618 TMC5 | 1 |
| hsa-miR-5682 NM_0012618 TMC5 | 1 |
| hsa-miR-5698 NM_0012618 TMC5 | 1 |
| hsa-miR-1199 NM_0012618 TMC5 | 1 |
| hsa-miR-6068 NM_0012618 TMC5 | 1 |
| hsa-miR-6069 NM_0012618 TMC5 | 1 |
| hsa-miR-6071 NM_0012618 TMC5 | 1 |
| hsa-miR-6075 NM_0012618 TMC5 | 1 |
| hsa-miR-6086 NM_0012618 TMC5 | 1 |
| hsa-miR-650C NM_0012618 TMC5 | 1 |
| hsa-miR-651C NM_0012618 TMC5 | 1 |
| hsa-miR-6715 NM_0012618 TMC5 | 1 |
| hsa-miR-6717 NM_0012618 TMC5 | 1 |
| hsa-miR-672C NM_0012618 TMC5 | 1 |
| hsa-miR-6721 NM_0012618 TMC5 | 1 |
| hsa-miR-6727 NM_0012618 TMC5 | 1 |
| hsa-miR-6728 NM_0012618 TMC5 | 1 |
| hsa-miR-6735 NM_0012618 TMC5 | 1 |
| hsa-miR-6735 NM_0012618 TMC5 | 1 |
| hsa-miR-674C NM_0012618 TMC5 | 1 |
| hsa-miR-6742 NM_0012618 TMC5 | 1 |
| hsa-miR-6748 NM_0012618 TMC5 | 1 |
| hsa-miR-6751 NM_0012618 TMC5 | 1 |
| hsa-miR-6751 NM_0012618 TMC5 | 1 |
| hsa-miR-6753 NM_0012618 TMC5 | 1 |
| hsa-miR-6754 NM_0012618 TMC5 | 1 |
| hsa-miR-6759 NM_0012618 TMC5 | 1 |
| hsa-miR-6763 NM_0012618 TMC5 | 1 |
| hsa-miR-6765 NM_0012618 TMC5 | 1 |
| hsa-miR-6769 NM_0012618 TMC5 | 1 |

|                               |   |
|-------------------------------|---|
| hsa-miR-677C NM_0012618 TMC5  | 1 |
| hsa-miR-677C NM_0012618 TMC5  | 1 |
| hsa-miR-6771 NM_0012618 TMC5  | 1 |
| hsa-miR-6771 NM_0012618 TMC5  | 1 |
| hsa-miR-6777 NM_0012618 TMC5  | 1 |
| hsa-miR-6779 NM_0012618 TMC5  | 1 |
| hsa-miR-678C NM_0012618 TMC5  | 1 |
| hsa-miR-6787 NM_0012618 TMC5  | 1 |
| hsa-miR-6789 NM_0012618 TMC5  | 1 |
| hsa-miR-6792 NM_0012618 TMC5  | 1 |
| hsa-miR-6792 NM_0012618 TMC5  | 1 |
| hsa-miR-6794 NM_0012618 TMC5  | 1 |
| hsa-miR-6795 NM_0012618 TMC5  | 1 |
| hsa-miR-6796 NM_0012618 TMC5  | 1 |
| hsa-miR-6798 NM_0012618 TMC5  | 1 |
| hsa-miR-680C NM_0012618 TMC5  | 1 |
| hsa-miR-6801 NM_0012618 TMC5  | 1 |
| hsa-miR-6803 NM_0012618 TMC5  | 1 |
| hsa-miR-6808 NM_0012618 TMC5  | 1 |
| hsa-miR-6833 NM_0012618 TMC5  | 1 |
| hsa-miR-6836 NM_0012618 TMC5  | 1 |
| hsa-miR-6837 NM_0012618 TMC5  | 1 |
| hsa-miR-6842 NM_0012618 TMC5  | 1 |
| hsa-miR-6842 NM_0012618 TMC5  | 1 |
| hsa-miR-6842 NM_0012618 TMC5  | 1 |
| hsa-miR-6853 NM_0012618 TMC5  | 1 |
| hsa-miR-6854 NM_0012618 TMC5  | 1 |
| hsa-miR-6858 NM_0012618 TMC5  | 1 |
| hsa-miR-6861 NM_0012618 TMC5  | 1 |
| hsa-miR-6861 NM_0012618 TMC5  | 1 |
| hsa-miR-6875 NM_0012618 TMC5  | 1 |
| hsa-miR-6875 NM_0012618 TMC5  | 1 |
| hsa-miR-6878 NM_0012618 TMC5  | 1 |
| hsa-miR-6879 NM_0012618 TMC5  | 1 |
| hsa-miR-688C NM_0012618 TMC5  | 1 |
| hsa-miR-6881 NM_0012618 TMC5  | 1 |
| hsa-miR-6882 NM_0012618 TMC5  | 1 |
| hsa-miR-6883 NM_0012618 TMC5  | 1 |
| hsa-miR-6885 NM_0012618 TMC5  | 1 |
| hsa-miR-6893 NM_0012618 TMC5  | 1 |
| hsa-miR-7114 NM_0012618 TMC5  | 1 |
| hsa-miR-716C NM_0012618 TMC5  | 1 |
| hsa-miR-716C NM_0012618 TMC5  | 1 |
| hsa-miR-7843 NM_0012618 TMC5  | 1 |
| hsa-miR-1273 NM_0012618 TMC5  | 1 |
| hsa-miR-8063 NM_0012618 TMC5  | 1 |
| hsa-miR-9903 NM_0012618 TMC5  | 1 |
| hsa-miR-1039 NM_0012618 TMC5  | 1 |
| hsa-miR-104C NM_0012618 TMC5  | 1 |
| hsa-miR-1118 NM_0012618 TMC5  | 1 |
| hsa-miR-1139 NM_0012618 TMC5  | 1 |
| hsa-miR-1212 NM_0012618 TMC5  | 1 |
| hsa-let-7b-3p NM_0013081 TMC5 | 1 |
| hsa-miR-17-3j NM_0013081 TMC5 | 1 |
| hsa-miR-25-3j NM_0013081 TMC5 | 1 |
| hsa-miR-92a- NM_0013081 TMC5  | 1 |
| hsa-miR-93-3j NM_0013081 TMC5 | 1 |
| hsa-miR-129- NM_0013081 TMC5  | 1 |
| hsa-miR-34a- NM_0013081 TMC5  | 1 |
| hsa-miR-203a NM_0013081 TMC5  | 1 |
| hsa-miR-200b NM_0013081 TMC5  | 1 |
| hsa-miR-200b NM_0013081 TMC5  | 1 |
| hsa-let-7i-5p NM_0013081 TMC5 | 1 |
| hsa-miR-140- NM_0013081 TMC5  | 1 |
| hsa-miR-125b NM_0013081 TMC5  | 1 |
| hsa-miR-134- NM_0013081 TMC5  | 1 |
| hsa-miR-149- NM_0013081 TMC5  | 1 |
| hsa-miR-154- NM_0013081 TMC5  | 1 |
| hsa-miR-320a NM_0013081 TMC5  | 1 |
| hsa-miR-320a NM_0013081 TMC5  | 1 |
| hsa-miR-299- NM_0013081 TMC5  | 1 |
| hsa-miR-363- NM_0013081 TMC5  | 1 |
| hsa-miR-376a NM_0013081 TMC5  | 1 |
| hsa-miR-339- NM_0013081 TMC5  | 1 |
| hsa-miR-339- NM_0013081 TMC5  | 1 |
| hsa-miR-196b NM_0013081 TMC5  | 1 |
| hsa-miR-423- NM_0013081 TMC5  | 1 |
| hsa-miR-484 NM_0013081 TMC5   | 1 |
| hsa-miR-484 NM_0013081 TMC5   | 1 |
| hsa-miR-486- NM_0013081 TMC5  | 1 |
| hsa-miR-489- NM_0013081 TMC5  | 1 |
| hsa-miR-202- NM_0013081 TMC5  | 1 |
| hsa-miR-202- NM_0013081 TMC5  | 1 |
| hsa-miR-494- NM_0013081 TMC5  | 1 |
| hsa-miR-181d NM_0013081 TMC5  | 1 |
| hsa-miR-512- NM_0013081 TMC5  | 1 |
| hsa-miR-519e NM_0013081 TMC5  | 1 |
| hsa-miR-520b NM_0013081 TMC5  | 1 |
| hsa-miR-520g NM_0013081 TMC5  | 1 |
| hsa-miR-519a NM_0013081 TMC5  | 1 |
| hsa-miR-503- NM_0013081 TMC5  | 1 |
| hsa-miR-376a NM_0013081 TMC5  | 1 |
| hsa-miR-555 NM_0013081 TMC5   | 1 |
| hsa-miR-593- NM_0013081 TMC5  | 1 |

|              |            |      |   |
|--------------|------------|------|---|
| hsa-miR-639  | NM_0013081 | TMC5 | 1 |
| hsa-miR-639  | NM_0013081 | TMC5 | 1 |
| hsa-miR-645  | NM_0013081 | TMC5 | 1 |
| hsa-miR-645  | NM_0013081 | TMC5 | 1 |
| hsa-miR-659- | NM_0013081 | TMC5 | 1 |
| hsa-miR-660- | NM_0013081 | TMC5 | 1 |
| hsa-miR-660- | NM_0013081 | TMC5 | 1 |
| hsa-miR-542- | NM_0013081 | TMC5 | 1 |
| hsa-miR-1224 | NM_0013081 | TMC5 | 1 |
| hsa-miR-320b | NM_0013081 | TMC5 | 1 |
| hsa-miR-1468 | NM_0013081 | TMC5 | 1 |
| hsa-miR-449c | NM_0013081 | TMC5 | 1 |
| hsa-miR-769- | NM_0013081 | TMC5 | 1 |
| hsa-miR-892b | NM_0013081 | TMC5 | 1 |
| hsa-miR-877- | NM_0013081 | TMC5 | 1 |
| hsa-miR-509- | NM_0013081 | TMC5 | 1 |
| hsa-miR-933  | NM_0013081 | TMC5 | 1 |
| hsa-miR-937- | NM_0013081 | TMC5 | 1 |
| hsa-miR-939- | NM_0013081 | TMC5 | 1 |
| hsa-miR-940  | NM_0013081 | TMC5 | 1 |
| hsa-miR-120C | NM_0013081 | TMC5 | 1 |
| hsa-miR-1207 | NM_0013081 | TMC5 | 1 |
| hsa-miR-1208 | NM_0013081 | TMC5 | 1 |
| hsa-miR-1303 | NM_0013081 | TMC5 | 1 |
| hsa-miR-1304 | NM_0013081 | TMC5 | 1 |
| hsa-miR-1261 | NM_0013081 | TMC5 | 1 |
| hsa-miR-548h | NM_0013081 | TMC5 | 1 |
| hsa-miR-1292 | NM_0013081 | TMC5 | 1 |
| hsa-miR-1292 | NM_0013081 | TMC5 | 1 |
| hsa-miR-664a | NM_0013081 | TMC5 | 1 |
| hsa-miR-1905 | NM_0013081 | TMC5 | 1 |
| hsa-miR-2116 | NM_0013081 | TMC5 | 1 |
| hsa-miR-2276 | NM_0013081 | TMC5 | 1 |
| hsa-miR-2682 | NM_0013081 | TMC5 | 1 |
| hsa-miR-312C | NM_0013081 | TMC5 | 1 |
| hsa-miR-3127 | NM_0013081 | TMC5 | 1 |
| hsa-miR-314C | NM_0013081 | TMC5 | 1 |
| hsa-miR-548u | NM_0013081 | TMC5 | 1 |
| hsa-miR-3144 | NM_0013081 | TMC5 | 1 |
| hsa-miR-3151 | NM_0013081 | TMC5 | 1 |
| hsa-miR-3155 | NM_0013081 | TMC5 | 1 |
| hsa-miR-3183 | NM_0013081 | TMC5 | 1 |
| hsa-miR-3184 | NM_0013081 | TMC5 | 1 |
| hsa-miR-3192 | NM_0013081 | TMC5 | 1 |
| hsa-miR-4294 | NM_0013081 | TMC5 | 1 |
| hsa-miR-4298 | NM_0013081 | TMC5 | 1 |
| hsa-miR-4308 | NM_0013081 | TMC5 | 1 |
| hsa-miR-426C | NM_0013081 | TMC5 | 1 |
| hsa-miR-4326 | NM_0013081 | TMC5 | 1 |
| hsa-miR-4274 | NM_0013081 | TMC5 | 1 |
| hsa-miR-4277 | NM_0013081 | TMC5 | 1 |
| hsa-miR-23c  | NM_0013081 | TMC5 | 1 |
| hsa-miR-3622 | NM_0013081 | TMC5 | 1 |
| hsa-miR-3655 | NM_0013081 | TMC5 | 1 |
| hsa-miR-3672 | NM_0013081 | TMC5 | 1 |
| hsa-miR-3685 | NM_0013081 | TMC5 | 1 |
| hsa-miR-315C | NM_0013081 | TMC5 | 1 |
| hsa-miR-642b | NM_0013081 | TMC5 | 1 |
| hsa-miR-4433 | NM_0013081 | TMC5 | 1 |
| hsa-miR-4433 | NM_0013081 | TMC5 | 1 |
| hsa-miR-4437 | NM_0013081 | TMC5 | 1 |
| hsa-miR-4443 | NM_0013081 | TMC5 | 1 |
| hsa-miR-4446 | NM_0013081 | TMC5 | 1 |
| hsa-miR-4452 | NM_0013081 | TMC5 | 1 |
| hsa-miR-4458 | NM_0013081 | TMC5 | 1 |
| hsa-miR-3135 | NM_0013081 | TMC5 | 1 |
| hsa-miR-4462 | NM_0013081 | TMC5 | 1 |
| hsa-miR-4472 | NM_0013081 | TMC5 | 1 |
| hsa-miR-4493 | NM_0013081 | TMC5 | 1 |
| hsa-miR-4512 | NM_0013081 | TMC5 | 1 |
| hsa-miR-4512 | NM_0013081 | TMC5 | 1 |
| hsa-miR-4537 | NM_0013081 | TMC5 | 1 |
| hsa-miR-4641 | NM_0013081 | TMC5 | 1 |
| hsa-miR-4685 | NM_0013081 | TMC5 | 1 |
| hsa-miR-4695 | NM_0013081 | TMC5 | 1 |
| hsa-miR-4716 | NM_0013081 | TMC5 | 1 |
| hsa-miR-3525 | NM_0013081 | TMC5 | 1 |
| hsa-miR-4717 | NM_0013081 | TMC5 | 1 |
| hsa-miR-4726 | NM_0013081 | TMC5 | 1 |
| hsa-miR-473C | NM_0013081 | TMC5 | 1 |
| hsa-miR-4733 | NM_0013081 | TMC5 | 1 |
| hsa-miR-3064 | NM_0013081 | TMC5 | 1 |
| hsa-miR-3064 | NM_0013081 | TMC5 | 1 |
| hsa-miR-474C | NM_0013081 | TMC5 | 1 |
| hsa-miR-4748 | NM_0013081 | TMC5 | 1 |
| hsa-miR-475C | NM_0013081 | TMC5 | 1 |
| hsa-miR-4753 | NM_0013081 | TMC5 | 1 |
| hsa-miR-4757 | NM_0013081 | TMC5 | 1 |
| hsa-miR-4772 | NM_0013081 | TMC5 | 1 |
| hsa-miR-4774 | NM_0013081 | TMC5 | 1 |
| hsa-miR-4776 | NM_0013081 | TMC5 | 1 |
| hsa-miR-4436 | NM_0013081 | TMC5 | 1 |
| hsa-miR-2467 | NM_0013081 | TMC5 | 1 |
| hsa-miR-5001 | NM_0013081 | TMC5 | 1 |

|                              |   |
|------------------------------|---|
| hsa-miR-5003 NM_0013081 TMC5 | 1 |
| hsa-miR-5003 NM_0013081 TMC5 | 1 |
| hsa-miR-5004 NM_0013081 TMC5 | 1 |
| hsa-miR-5006 NM_0013081 TMC5 | 1 |
| hsa-miR-5007 NM_0013081 TMC5 | 1 |
| hsa-miR-519C NM_0013081 TMC5 | 1 |
| hsa-miR-4524 NM_0013081 TMC5 | 1 |
| hsa-miR-5572 NM_0013081 TMC5 | 1 |
| hsa-miR-548a NM_0013081 TMC5 | 1 |
| hsa-miR-664b NM_0013081 TMC5 | 1 |
| hsa-miR-1295 NM_0013081 TMC5 | 1 |
| hsa-miR-5588 NM_0013081 TMC5 | 1 |
| hsa-miR-5589 NM_0013081 TMC5 | 1 |
| hsa-miR-5682 NM_0013081 TMC5 | 1 |
| hsa-miR-5698 NM_0013081 TMC5 | 1 |
| hsa-miR-5787 NM_0013081 TMC5 | 1 |
| hsa-miR-6068 NM_0013081 TMC5 | 1 |
| hsa-miR-6069 NM_0013081 TMC5 | 1 |
| hsa-miR-6071 NM_0013081 TMC5 | 1 |
| hsa-miR-6075 NM_0013081 TMC5 | 1 |
| hsa-miR-6086 NM_0013081 TMC5 | 1 |
| hsa-miR-650C NM_0013081 TMC5 | 1 |
| hsa-miR-651C NM_0013081 TMC5 | 1 |
| hsa-miR-6715 NM_0013081 TMC5 | 1 |
| hsa-miR-6727 NM_0013081 TMC5 | 1 |
| hsa-miR-6728 NM_0013081 TMC5 | 1 |
| hsa-miR-6735 NM_0013081 TMC5 | 1 |
| hsa-miR-6735 NM_0013081 TMC5 | 1 |
| hsa-miR-674C NM_0013081 TMC5 | 1 |
| hsa-miR-6748 NM_0013081 TMC5 | 1 |
| hsa-miR-6748 NM_0013081 TMC5 | 1 |
| hsa-miR-6748 NM_0013081 TMC5 | 1 |
| hsa-miR-6751 NM_0013081 TMC5 | 1 |
| hsa-miR-6753 NM_0013081 TMC5 | 1 |
| hsa-miR-6754 NM_0013081 TMC5 | 1 |
| hsa-miR-6759 NM_0013081 TMC5 | 1 |
| hsa-miR-6761 NM_0013081 TMC5 | 1 |
| hsa-miR-6763 NM_0013081 TMC5 | 1 |
| hsa-miR-6765 NM_0013081 TMC5 | 1 |
| hsa-miR-6769 NM_0013081 TMC5 | 1 |
| hsa-miR-677C NM_0013081 TMC5 | 1 |
| hsa-miR-6771 NM_0013081 TMC5 | 1 |
| hsa-miR-6777 NM_0013081 TMC5 | 1 |
| hsa-miR-6779 NM_0013081 TMC5 | 1 |
| hsa-miR-678C NM_0013081 TMC5 | 1 |
| hsa-miR-6787 NM_0013081 TMC5 | 1 |
| hsa-miR-6789 NM_0013081 TMC5 | 1 |
| hsa-miR-6792 NM_0013081 TMC5 | 1 |
| hsa-miR-6792 NM_0013081 TMC5 | 1 |
| hsa-miR-6794 NM_0013081 TMC5 | 1 |
| hsa-miR-6795 NM_0013081 TMC5 | 1 |
| hsa-miR-6798 NM_0013081 TMC5 | 1 |
| hsa-miR-680C NM_0013081 TMC5 | 1 |
| hsa-miR-6801 NM_0013081 TMC5 | 1 |
| hsa-miR-6808 NM_0013081 TMC5 | 1 |
| hsa-miR-6829 NM_0013081 TMC5 | 1 |
| hsa-miR-6833 NM_0013081 TMC5 | 1 |
| hsa-miR-6837 NM_0013081 TMC5 | 1 |
| hsa-miR-6842 NM_0013081 TMC5 | 1 |
| hsa-miR-6853 NM_0013081 TMC5 | 1 |
| hsa-miR-6858 NM_0013081 TMC5 | 1 |
| hsa-miR-6769 NM_0013081 TMC5 | 1 |
| hsa-miR-6861 NM_0013081 TMC5 | 1 |
| hsa-miR-6875 NM_0013081 TMC5 | 1 |
| hsa-miR-6875 NM_0013081 TMC5 | 1 |
| hsa-miR-6878 NM_0013081 TMC5 | 1 |
| hsa-miR-6879 NM_0013081 TMC5 | 1 |
| hsa-miR-688C NM_0013081 TMC5 | 1 |
| hsa-miR-6881 NM_0013081 TMC5 | 1 |
| hsa-miR-6882 NM_0013081 TMC5 | 1 |
| hsa-miR-6883 NM_0013081 TMC5 | 1 |
| hsa-miR-6885 NM_0013081 TMC5 | 1 |
| hsa-miR-6893 NM_0013081 TMC5 | 1 |
| hsa-miR-716C NM_0013081 TMC5 | 1 |
| hsa-miR-7843 NM_0013081 TMC5 | 1 |
| hsa-miR-1273 NM_0013081 TMC5 | 1 |
| hsa-miR-9903 NM_0013081 TMC5 | 1 |
| hsa-miR-1022 NM_0013081 TMC5 | 1 |
| hsa-miR-1118 NM_0013081 TMC5 | 1 |
| hsa-miR-1139 NM_0013081 TMC5 | 1 |
| hsa-miR-1212 NM_0013081 TMC5 | 1 |
| hsa-let-7b-3p NM_024780 TMC5 | 1 |
| hsa-miR-17-3j NM_024780 TMC5 | 1 |
| hsa-miR-25-3j NM_024780 TMC5 | 1 |
| hsa-miR-92a- NM_024780 TMC5  | 1 |
| hsa-miR-93-3j NM_024780 TMC5 | 1 |
| hsa-miR-29b- NM_024780 TMC5  | 1 |
| hsa-miR-129- NM_024780 TMC5  | 1 |
| hsa-miR-139- NM_024780 TMC5  | 1 |
| hsa-miR-34a- NM_024780 TMC5  | 1 |
| hsa-miR-203a NM_024780 TMC5  | 1 |
| hsa-miR-200b NM_024780 TMC5  | 1 |
| hsa-miR-200b NM_024780 TMC5  | 1 |
| hsa-let-7i-5p NM_024780 TMC5 | 1 |



|              |           |      |   |
|--------------|-----------|------|---|
| hsa-miR-140- | NM_024780 | TMC5 | 1 |
| hsa-miR-143- | NM_024780 | TMC5 | 1 |
| hsa-miR-149- | NM_024780 | TMC5 | 1 |
| hsa-miR-154- | NM_024780 | TMC5 | 1 |
| hsa-miR-185- | NM_024780 | TMC5 | 1 |
| hsa-miR-320a | NM_024780 | TMC5 | 1 |
| hsa-miR-320a | NM_024780 | TMC5 | 1 |
| hsa-miR-299- | NM_024780 | TMC5 | 1 |
| hsa-miR-130t | NM_024780 | TMC5 | 1 |
| hsa-miR-363- | NM_024780 | TMC5 | 1 |
| hsa-miR-370- | NM_024780 | TMC5 | 1 |
| hsa-miR-376a | NM_024780 | TMC5 | 1 |
| hsa-miR-326  | NM_024780 | TMC5 | 1 |
| hsa-miR-339- | NM_024780 | TMC5 | 1 |
| hsa-miR-339- | NM_024780 | TMC5 | 1 |
| hsa-miR-196t | NM_024780 | TMC5 | 1 |
| hsa-miR-423- | NM_024780 | TMC5 | 1 |
| hsa-miR-484  | NM_024780 | TMC5 | 1 |
| hsa-miR-484  | NM_024780 | TMC5 | 1 |
| hsa-miR-486- | NM_024780 | TMC5 | 1 |
| hsa-miR-489- | NM_024780 | TMC5 | 1 |
| hsa-miR-202- | NM_024780 | TMC5 | 1 |
| hsa-miR-202- | NM_024780 | TMC5 | 1 |
| hsa-miR-494- | NM_024780 | TMC5 | 1 |
| hsa-miR-193t | NM_024780 | TMC5 | 1 |
| hsa-miR-181d | NM_024780 | TMC5 | 1 |
| hsa-miR-512- | NM_024780 | TMC5 | 1 |
| hsa-miR-519e | NM_024780 | TMC5 | 1 |
| hsa-miR-520t | NM_024780 | TMC5 | 1 |
| hsa-miR-520g | NM_024780 | TMC5 | 1 |
| hsa-miR-519a | NM_024780 | TMC5 | 1 |
| hsa-miR-503- | NM_024780 | TMC5 | 1 |
| hsa-miR-376a | NM_024780 | TMC5 | 1 |
| hsa-miR-593- | NM_024780 | TMC5 | 1 |
| hsa-miR-608  | NM_024780 | TMC5 | 1 |
| hsa-miR-611  | NM_024780 | TMC5 | 1 |
| hsa-miR-623  | NM_024780 | TMC5 | 1 |
| hsa-miR-639  | NM_024780 | TMC5 | 1 |
| hsa-miR-639  | NM_024780 | TMC5 | 1 |
| hsa-miR-645  | NM_024780 | TMC5 | 1 |
| hsa-miR-645  | NM_024780 | TMC5 | 1 |
| hsa-miR-449t | NM_024780 | TMC5 | 1 |
| hsa-miR-659- | NM_024780 | TMC5 | 1 |
| hsa-miR-660- | NM_024780 | TMC5 | 1 |
| hsa-miR-660- | NM_024780 | TMC5 | 1 |
| hsa-miR-542- | NM_024780 | TMC5 | 1 |
| hsa-miR-1224 | NM_024780 | TMC5 | 1 |
| hsa-miR-320t | NM_024780 | TMC5 | 1 |
| hsa-miR-1468 | NM_024780 | TMC5 | 1 |
| hsa-miR-1271 | NM_024780 | TMC5 | 1 |
| hsa-miR-449c | NM_024780 | TMC5 | 1 |
| hsa-miR-769- | NM_024780 | TMC5 | 1 |
| hsa-miR-892t | NM_024780 | TMC5 | 1 |
| hsa-miR-877- | NM_024780 | TMC5 | 1 |
| hsa-miR-933  | NM_024780 | TMC5 | 1 |
| hsa-miR-937- | NM_024780 | TMC5 | 1 |
| hsa-miR-939- | NM_024780 | TMC5 | 1 |
| hsa-miR-940  | NM_024780 | TMC5 | 1 |
| hsa-miR-1184 | NM_024780 | TMC5 | 1 |
| hsa-miR-1237 | NM_024780 | TMC5 | 1 |
| hsa-miR-1237 | NM_024780 | TMC5 | 1 |
| hsa-miR-120C | NM_024780 | TMC5 | 1 |
| hsa-miR-1208 | NM_024780 | TMC5 | 1 |
| hsa-miR-1303 | NM_024780 | TMC5 | 1 |
| hsa-miR-1304 | NM_024780 | TMC5 | 1 |
| hsa-miR-1261 | NM_024780 | TMC5 | 1 |
| hsa-miR-548h | NM_024780 | TMC5 | 1 |
| hsa-miR-1292 | NM_024780 | TMC5 | 1 |
| hsa-miR-1292 | NM_024780 | TMC5 | 1 |
| hsa-miR-664a | NM_024780 | TMC5 | 1 |
| hsa-miR-1306 | NM_024780 | TMC5 | 1 |
| hsa-miR-1535 | NM_024780 | TMC5 | 1 |
| hsa-miR-1905 | NM_024780 | TMC5 | 1 |
| hsa-miR-2116 | NM_024780 | TMC5 | 1 |
| hsa-miR-2276 | NM_024780 | TMC5 | 1 |
| hsa-miR-2682 | NM_024780 | TMC5 | 1 |
| hsa-miR-2861 | NM_024780 | TMC5 | 1 |
| hsa-miR-312C | NM_024780 | TMC5 | 1 |
| hsa-miR-378t | NM_024780 | TMC5 | 1 |
| hsa-miR-314C | NM_024780 | TMC5 | 1 |
| hsa-miR-548u | NM_024780 | TMC5 | 1 |
| hsa-miR-3151 | NM_024780 | TMC5 | 1 |
| hsa-miR-3155 | NM_024780 | TMC5 | 1 |
| hsa-miR-3183 | NM_024780 | TMC5 | 1 |
| hsa-miR-3184 | NM_024780 | TMC5 | 1 |
| hsa-miR-3191 | NM_024780 | TMC5 | 1 |
| hsa-miR-3191 | NM_024780 | TMC5 | 1 |
| hsa-miR-3192 | NM_024780 | TMC5 | 1 |
| hsa-miR-4294 | NM_024780 | TMC5 | 1 |
| hsa-miR-4308 | NM_024780 | TMC5 | 1 |
| hsa-miR-426C | NM_024780 | TMC5 | 1 |
| hsa-miR-4326 | NM_024780 | TMC5 | 1 |
| hsa-miR-4327 | NM_024780 | TMC5 | 1 |
| hsa-miR-4274 | NM_024780 | TMC5 | 1 |

|              |           |      |   |
|--------------|-----------|------|---|
| hsa-miR-23c  | NM_024780 | TMC5 | 1 |
| hsa-miR-362C | NM_024780 | TMC5 | 1 |
| hsa-miR-3622 | NM_024780 | TMC5 | 1 |
| hsa-miR-3655 | NM_024780 | TMC5 | 1 |
| hsa-miR-3672 | NM_024780 | TMC5 | 1 |
| hsa-miR-3689 | NM_024780 | TMC5 | 1 |
| hsa-miR-3908 | NM_024780 | TMC5 | 1 |
| hsa-miR-315C | NM_024780 | TMC5 | 1 |
| hsa-miR-642b | NM_024780 | TMC5 | 1 |
| hsa-miR-378g | NM_024780 | TMC5 | 1 |
| hsa-miR-4433 | NM_024780 | TMC5 | 1 |
| hsa-miR-4437 | NM_024780 | TMC5 | 1 |
| hsa-miR-4443 | NM_024780 | TMC5 | 1 |
| hsa-miR-4446 | NM_024780 | TMC5 | 1 |
| hsa-miR-4447 | NM_024780 | TMC5 | 1 |
| hsa-miR-4452 | NM_024780 | TMC5 | 1 |
| hsa-miR-4458 | NM_024780 | TMC5 | 1 |
| hsa-miR-3135 | NM_024780 | TMC5 | 1 |
| hsa-miR-4462 | NM_024780 | TMC5 | 1 |
| hsa-miR-4472 | NM_024780 | TMC5 | 1 |
| hsa-miR-4487 | NM_024780 | TMC5 | 1 |
| hsa-miR-4493 | NM_024780 | TMC5 | 1 |
| hsa-miR-4507 | NM_024780 | TMC5 | 1 |
| hsa-miR-4512 | NM_024780 | TMC5 | 1 |
| hsa-miR-4512 | NM_024780 | TMC5 | 1 |
| hsa-miR-4533 | NM_024780 | TMC5 | 1 |
| hsa-miR-4537 | NM_024780 | TMC5 | 1 |
| hsa-miR-4641 | NM_024780 | TMC5 | 1 |
| hsa-miR-4676 | NM_024780 | TMC5 | 1 |
| hsa-miR-4682 | NM_024780 | TMC5 | 1 |
| hsa-miR-4685 | NM_024780 | TMC5 | 1 |
| hsa-miR-4689 | NM_024780 | TMC5 | 1 |
| hsa-miR-4716 | NM_024780 | TMC5 | 1 |
| hsa-miR-3529 | NM_024780 | TMC5 | 1 |
| hsa-miR-4722 | NM_024780 | TMC5 | 1 |
| hsa-miR-4726 | NM_024780 | TMC5 | 1 |
| hsa-miR-473C | NM_024780 | TMC5 | 1 |
| hsa-miR-473C | NM_024780 | TMC5 | 1 |
| hsa-miR-4733 | NM_024780 | TMC5 | 1 |
| hsa-miR-3064 | NM_024780 | TMC5 | 1 |
| hsa-miR-3064 | NM_024780 | TMC5 | 1 |
| hsa-miR-474C | NM_024780 | TMC5 | 1 |
| hsa-miR-4748 | NM_024780 | TMC5 | 1 |
| hsa-miR-475C | NM_024780 | TMC5 | 1 |
| hsa-miR-475C | NM_024780 | TMC5 | 1 |
| hsa-miR-4753 | NM_024780 | TMC5 | 1 |
| hsa-miR-4757 | NM_024780 | TMC5 | 1 |
| hsa-miR-4763 | NM_024780 | TMC5 | 1 |
| hsa-miR-4767 | NM_024780 | TMC5 | 1 |
| hsa-miR-4768 | NM_024780 | TMC5 | 1 |
| hsa-miR-4772 | NM_024780 | TMC5 | 1 |
| hsa-miR-4774 | NM_024780 | TMC5 | 1 |
| hsa-miR-4776 | NM_024780 | TMC5 | 1 |
| hsa-miR-2467 | NM_024780 | TMC5 | 1 |
| hsa-miR-5001 | NM_024780 | TMC5 | 1 |
| hsa-miR-5001 | NM_024780 | TMC5 | 1 |
| hsa-miR-5003 | NM_024780 | TMC5 | 1 |
| hsa-miR-5003 | NM_024780 | TMC5 | 1 |
| hsa-miR-5004 | NM_024780 | TMC5 | 1 |
| hsa-miR-5006 | NM_024780 | TMC5 | 1 |
| hsa-miR-5007 | NM_024780 | TMC5 | 1 |
| hsa-miR-5087 | NM_024780 | TMC5 | 1 |
| hsa-miR-519C | NM_024780 | TMC5 | 1 |
| hsa-miR-5195 | NM_024780 | TMC5 | 1 |
| hsa-miR-4524 | NM_024780 | TMC5 | 1 |
| hsa-miR-5572 | NM_024780 | TMC5 | 1 |
| hsa-miR-548a | NM_024780 | TMC5 | 1 |
| hsa-miR-664b | NM_024780 | TMC5 | 1 |
| hsa-miR-1295 | NM_024780 | TMC5 | 1 |
| hsa-miR-5588 | NM_024780 | TMC5 | 1 |
| hsa-miR-5589 | NM_024780 | TMC5 | 1 |
| hsa-miR-5589 | NM_024780 | TMC5 | 1 |
| hsa-miR-5682 | NM_024780 | TMC5 | 1 |
| hsa-miR-5698 | NM_024780 | TMC5 | 1 |
| hsa-miR-5699 | NM_024780 | TMC5 | 1 |
| hsa-miR-5787 | NM_024780 | TMC5 | 1 |
| hsa-miR-1199 | NM_024780 | TMC5 | 1 |
| hsa-miR-6068 | NM_024780 | TMC5 | 1 |
| hsa-miR-6069 | NM_024780 | TMC5 | 1 |
| hsa-miR-6071 | NM_024780 | TMC5 | 1 |
| hsa-miR-6075 | NM_024780 | TMC5 | 1 |
| hsa-miR-6086 | NM_024780 | TMC5 | 1 |
| hsa-miR-650C | NM_024780 | TMC5 | 1 |
| hsa-miR-6501 | NM_024780 | TMC5 | 1 |
| hsa-miR-651C | NM_024780 | TMC5 | 1 |
| hsa-miR-6715 | NM_024780 | TMC5 | 1 |
| hsa-miR-672C | NM_024780 | TMC5 | 1 |
| hsa-miR-6721 | NM_024780 | TMC5 | 1 |
| hsa-miR-6727 | NM_024780 | TMC5 | 1 |
| hsa-miR-6728 | NM_024780 | TMC5 | 1 |
| hsa-miR-6735 | NM_024780 | TMC5 | 1 |
| hsa-miR-6735 | NM_024780 | TMC5 | 1 |
| hsa-miR-674C | NM_024780 | TMC5 | 1 |
| hsa-miR-674C | NM_024780 | TMC5 | 1 |

|                          |      |   |
|--------------------------|------|---|
| hsa-miR-6748 NM_024780   | TMC5 | 1 |
| hsa-miR-6748 NM_024780   | TMC5 | 1 |
| hsa-miR-6748 NM_024780   | TMC5 | 1 |
| hsa-miR-6751 NM_024780   | TMC5 | 1 |
| hsa-miR-6751 NM_024780   | TMC5 | 1 |
| hsa-miR-6753 NM_024780   | TMC5 | 1 |
| hsa-miR-6754 NM_024780   | TMC5 | 1 |
| hsa-miR-6756 NM_024780   | TMC5 | 1 |
| hsa-miR-6756 NM_024780   | TMC5 | 1 |
| hsa-miR-6758 NM_024780   | TMC5 | 1 |
| hsa-miR-6759 NM_024780   | TMC5 | 1 |
| hsa-miR-6763 NM_024780   | TMC5 | 1 |
| hsa-miR-6765 NM_024780   | TMC5 | 1 |
| hsa-miR-6765 NM_024780   | TMC5 | 1 |
| hsa-miR-6769 NM_024780   | TMC5 | 1 |
| hsa-miR-6770 NM_024780   | TMC5 | 1 |
| hsa-miR-6771 NM_024780   | TMC5 | 1 |
| hsa-miR-6771 NM_024780   | TMC5 | 1 |
| hsa-miR-6772 NM_024780   | TMC5 | 1 |
| hsa-miR-6777 NM_024780   | TMC5 | 1 |
| hsa-miR-6780 NM_024780   | TMC5 | 1 |
| hsa-miR-6787 NM_024780   | TMC5 | 1 |
| hsa-miR-6789 NM_024780   | TMC5 | 1 |
| hsa-miR-6792 NM_024780   | TMC5 | 1 |
| hsa-miR-6792 NM_024780   | TMC5 | 1 |
| hsa-miR-6794 NM_024780   | TMC5 | 1 |
| hsa-miR-6795 NM_024780   | TMC5 | 1 |
| hsa-miR-6798 NM_024780   | TMC5 | 1 |
| hsa-miR-6800 NM_024780   | TMC5 | 1 |
| hsa-miR-6801 NM_024780   | TMC5 | 1 |
| hsa-miR-6803 NM_024780   | TMC5 | 1 |
| hsa-miR-6808 NM_024780   | TMC5 | 1 |
| hsa-miR-6810 NM_024780   | TMC5 | 1 |
| hsa-miR-6829 NM_024780   | TMC5 | 1 |
| hsa-miR-6833 NM_024780   | TMC5 | 1 |
| hsa-miR-6836 NM_024780   | TMC5 | 1 |
| hsa-miR-6837 NM_024780   | TMC5 | 1 |
| hsa-miR-6842 NM_024780   | TMC5 | 1 |
| hsa-miR-6842 NM_024780   | TMC5 | 1 |
| hsa-miR-6842 NM_024780   | TMC5 | 1 |
| hsa-miR-6853 NM_024780   | TMC5 | 1 |
| hsa-miR-6854 NM_024780   | TMC5 | 1 |
| hsa-miR-6858 NM_024780   | TMC5 | 1 |
| hsa-miR-6769 NM_024780   | TMC5 | 1 |
| hsa-miR-6861 NM_024780   | TMC5 | 1 |
| hsa-miR-6861 NM_024780   | TMC5 | 1 |
| hsa-miR-6875 NM_024780   | TMC5 | 1 |
| hsa-miR-6875 NM_024780   | TMC5 | 1 |
| hsa-miR-6878 NM_024780   | TMC5 | 1 |
| hsa-miR-6878 NM_024780   | TMC5 | 1 |
| hsa-miR-6879 NM_024780   | TMC5 | 1 |
| hsa-miR-6880 NM_024780   | TMC5 | 1 |
| hsa-miR-6881 NM_024780   | TMC5 | 1 |
| hsa-miR-6882 NM_024780   | TMC5 | 1 |
| hsa-miR-6883 NM_024780   | TMC5 | 1 |
| hsa-miR-6885 NM_024780   | TMC5 | 1 |
| hsa-miR-6885 NM_024780   | TMC5 | 1 |
| hsa-miR-6889 NM_024780   | TMC5 | 1 |
| hsa-miR-6895 NM_024780   | TMC5 | 1 |
| hsa-miR-7114 NM_024780   | TMC5 | 1 |
| hsa-miR-7150 NM_024780   | TMC5 | 1 |
| hsa-miR-7152 NM_024780   | TMC5 | 1 |
| hsa-miR-7160 NM_024780   | TMC5 | 1 |
| hsa-miR-7160 NM_024780   | TMC5 | 1 |
| hsa-miR-7843 NM_024780   | TMC5 | 1 |
| hsa-miR-1273 NM_024780   | TMC5 | 1 |
| hsa-miR-8063 NM_024780   | TMC5 | 1 |
| hsa-miR-9903 NM_024780   | TMC5 | 1 |
| hsa-miR-1022 NM_024780   | TMC5 | 1 |
| hsa-miR-1022 NM_024780   | TMC5 | 1 |
| hsa-miR-1039 NM_024780   | TMC5 | 1 |
| hsa-miR-1039 NM_024780   | TMC5 | 1 |
| hsa-miR-1040 NM_024780   | TMC5 | 1 |
| hsa-miR-1118 NM_024780   | TMC5 | 1 |
| hsa-miR-1139 NM_024780   | TMC5 | 1 |
| hsa-miR-1212 NM_024780   | TMC5 | 1 |
| hsa-let-7b-3p NM_0011052 | TMC5 | 1 |
| hsa-let-7d-3p NM_0011052 | TMC5 | 1 |
| hsa-miR-17-3j NM_0011052 | TMC5 | 1 |
| hsa-miR-25-3j NM_0011052 | TMC5 | 1 |
| hsa-miR-92a- NM_0011052  | TMC5 | 1 |
| hsa-miR-93-3j NM_0011052 | TMC5 | 1 |
| hsa-miR-34a- NM_0011052  | TMC5 | 1 |
| hsa-miR-200b NM_0011052  | TMC5 | 1 |
| hsa-miR-200b NM_0011052  | TMC5 | 1 |
| hsa-let-7i-5p NM_0011052 | TMC5 | 1 |
| hsa-miR-140- NM_0011052  | TMC5 | 1 |
| hsa-miR-125b NM_0011052  | TMC5 | 1 |
| hsa-miR-134- NM_0011052  | TMC5 | 1 |
| hsa-miR-154- NM_0011052  | TMC5 | 1 |
| hsa-miR-320a NM_0011052  | TMC5 | 1 |
| hsa-miR-299- NM_0011052  | TMC5 | 1 |
| hsa-miR-363- NM_0011052  | TMC5 | 1 |
| hsa-miR-365b NM_0011052  | TMC5 | 1 |
| hsa-miR-376a NM_0011052  | TMC5 | 1 |

|                              |   |
|------------------------------|---|
| hsa-miR-339- NM_0011052 TMC5 | 1 |
| hsa-miR-339- NM_0011052 TMC5 | 1 |
| hsa-miR-196t NM_0011052 TMC5 | 1 |
| hsa-miR-423- NM_0011052 TMC5 | 1 |
| hsa-miR-484 NM_0011052 TMC5  | 1 |
| hsa-miR-486- NM_0011052 TMC5 | 1 |
| hsa-miR-489- NM_0011052 TMC5 | 1 |
| hsa-miR-202- NM_0011052 TMC5 | 1 |
| hsa-miR-202- NM_0011052 TMC5 | 1 |
| hsa-miR-181d NM_0011052 TMC5 | 1 |
| hsa-miR-519e NM_0011052 TMC5 | 1 |
| hsa-miR-520t NM_0011052 TMC5 | 1 |
| hsa-miR-520g NM_0011052 TMC5 | 1 |
| hsa-miR-519a NM_0011052 TMC5 | 1 |
| hsa-miR-503- NM_0011052 TMC5 | 1 |
| hsa-miR-376a NM_0011052 TMC5 | 1 |
| hsa-miR-555 NM_0011052 TMC5  | 1 |
| hsa-miR-593- NM_0011052 TMC5 | 1 |
| hsa-miR-645 NM_0011052 TMC5  | 1 |
| hsa-miR-449t NM_0011052 TMC5 | 1 |
| hsa-miR-659- NM_0011052 TMC5 | 1 |
| hsa-miR-660- NM_0011052 TMC5 | 1 |
| hsa-miR-660- NM_0011052 TMC5 | 1 |
| hsa-miR-542- NM_0011052 TMC5 | 1 |
| hsa-miR-320t NM_0011052 TMC5 | 1 |
| hsa-miR-1468 NM_0011052 TMC5 | 1 |
| hsa-miR-449c NM_0011052 TMC5 | 1 |
| hsa-miR-769- NM_0011052 TMC5 | 1 |
| hsa-miR-892b NM_0011052 TMC5 | 1 |
| hsa-miR-509- NM_0011052 TMC5 | 1 |
| hsa-miR-939- NM_0011052 TMC5 | 1 |
| hsa-miR-1208 NM_0011052 TMC5 | 1 |
| hsa-miR-1303 NM_0011052 TMC5 | 1 |
| hsa-miR-1304 NM_0011052 TMC5 | 1 |
| hsa-miR-1261 NM_0011052 TMC5 | 1 |
| hsa-miR-548h NM_0011052 TMC5 | 1 |
| hsa-miR-664a NM_0011052 TMC5 | 1 |
| hsa-miR-1909 NM_0011052 TMC5 | 1 |
| hsa-miR-1915 NM_0011052 TMC5 | 1 |
| hsa-miR-2116 NM_0011052 TMC5 | 1 |
| hsa-miR-2682 NM_0011052 TMC5 | 1 |
| hsa-miR-312C NM_0011052 TMC5 | 1 |
| hsa-miR-3127 NM_0011052 TMC5 | 1 |
| hsa-miR-314C NM_0011052 TMC5 | 1 |
| hsa-miR-548u NM_0011052 TMC5 | 1 |
| hsa-miR-3144 NM_0011052 TMC5 | 1 |
| hsa-miR-3151 NM_0011052 TMC5 | 1 |
| hsa-miR-3155 NM_0011052 TMC5 | 1 |
| hsa-miR-3184 NM_0011052 TMC5 | 1 |
| hsa-miR-3192 NM_0011052 TMC5 | 1 |
| hsa-miR-4294 NM_0011052 TMC5 | 1 |
| hsa-miR-4308 NM_0011052 TMC5 | 1 |
| hsa-miR-4326 NM_0011052 TMC5 | 1 |
| hsa-miR-4277 NM_0011052 TMC5 | 1 |
| hsa-miR-23c NM_0011052 TMC5  | 1 |
| hsa-miR-3622 NM_0011052 TMC5 | 1 |
| hsa-miR-3672 NM_0011052 TMC5 | 1 |
| hsa-miR-315C NM_0011052 TMC5 | 1 |
| hsa-miR-4433 NM_0011052 TMC5 | 1 |
| hsa-miR-4437 NM_0011052 TMC5 | 1 |
| hsa-miR-4452 NM_0011052 TMC5 | 1 |
| hsa-miR-4458 NM_0011052 TMC5 | 1 |
| hsa-miR-3135 NM_0011052 TMC5 | 1 |
| hsa-miR-4472 NM_0011052 TMC5 | 1 |
| hsa-miR-4493 NM_0011052 TMC5 | 1 |
| hsa-miR-4512 NM_0011052 TMC5 | 1 |
| hsa-miR-4512 NM_0011052 TMC5 | 1 |
| hsa-miR-4537 NM_0011052 TMC5 | 1 |
| hsa-miR-4641 NM_0011052 TMC5 | 1 |
| hsa-miR-4689 NM_0011052 TMC5 | 1 |
| hsa-miR-4716 NM_0011052 TMC5 | 1 |
| hsa-miR-3529 NM_0011052 TMC5 | 1 |
| hsa-miR-4726 NM_0011052 TMC5 | 1 |
| hsa-miR-473C NM_0011052 TMC5 | 1 |
| hsa-miR-4733 NM_0011052 TMC5 | 1 |
| hsa-miR-3064 NM_0011052 TMC5 | 1 |
| hsa-miR-3064 NM_0011052 TMC5 | 1 |
| hsa-miR-474C NM_0011052 TMC5 | 1 |
| hsa-miR-4748 NM_0011052 TMC5 | 1 |
| hsa-miR-4753 NM_0011052 TMC5 | 1 |
| hsa-miR-4757 NM_0011052 TMC5 | 1 |
| hsa-miR-4772 NM_0011052 TMC5 | 1 |
| hsa-miR-4774 NM_0011052 TMC5 | 1 |
| hsa-miR-2467 NM_0011052 TMC5 | 1 |
| hsa-miR-5001 NM_0011052 TMC5 | 1 |
| hsa-miR-5003 NM_0011052 TMC5 | 1 |
| hsa-miR-5003 NM_0011052 TMC5 | 1 |
| hsa-miR-5004 NM_0011052 TMC5 | 1 |
| hsa-miR-5007 NM_0011052 TMC5 | 1 |
| hsa-miR-4524 NM_0011052 TMC5 | 1 |
| hsa-miR-548a NM_0011052 TMC5 | 1 |
| hsa-miR-664t NM_0011052 TMC5 | 1 |
| hsa-miR-1295 NM_0011052 TMC5 | 1 |
| hsa-miR-5588 NM_0011052 TMC5 | 1 |

|                               |   |
|-------------------------------|---|
| hsa-miR-5682 NM_0011052 TMC5  | 1 |
| hsa-miR-5698 NM_0011052 TMC5  | 1 |
| hsa-miR-6068 NM_0011052 TMC5  | 1 |
| hsa-miR-6075 NM_0011052 TMC5  | 1 |
| hsa-miR-6086 NM_0011052 TMC5  | 1 |
| hsa-miR-651C NM_0011052 TMC5  | 1 |
| hsa-miR-6715 NM_0011052 TMC5  | 1 |
| hsa-miR-6735 NM_0011052 TMC5  | 1 |
| hsa-miR-6735 NM_0011052 TMC5  | 1 |
| hsa-miR-674C NM_0011052 TMC5  | 1 |
| hsa-miR-6748 NM_0011052 TMC5  | 1 |
| hsa-miR-6748 NM_0011052 TMC5  | 1 |
| hsa-miR-6748 NM_0011052 TMC5  | 1 |
| hsa-miR-6753 NM_0011052 TMC5  | 1 |
| hsa-miR-6754 NM_0011052 TMC5  | 1 |
| hsa-miR-6755 NM_0011052 TMC5  | 1 |
| hsa-miR-6763 NM_0011052 TMC5  | 1 |
| hsa-miR-6765 NM_0011052 TMC5  | 1 |
| hsa-miR-6771 NM_0011052 TMC5  | 1 |
| hsa-miR-6771 NM_0011052 TMC5  | 1 |
| hsa-miR-6771 NM_0011052 TMC5  | 1 |
| hsa-miR-6777 NM_0011052 TMC5  | 1 |
| hsa-miR-678C NM_0011052 TMC5  | 1 |
| hsa-miR-6782 NM_0011052 TMC5  | 1 |
| hsa-miR-6787 NM_0011052 TMC5  | 1 |
| hsa-miR-6792 NM_0011052 TMC5  | 1 |
| hsa-miR-6794 NM_0011052 TMC5  | 1 |
| hsa-miR-6795 NM_0011052 TMC5  | 1 |
| hsa-miR-6798 NM_0011052 TMC5  | 1 |
| hsa-miR-6808 NM_0011052 TMC5  | 1 |
| hsa-miR-6817 NM_0011052 TMC5  | 1 |
| hsa-miR-6833 NM_0011052 TMC5  | 1 |
| hsa-miR-6837 NM_0011052 TMC5  | 1 |
| hsa-miR-6853 NM_0011052 TMC5  | 1 |
| hsa-miR-6854 NM_0011052 TMC5  | 1 |
| hsa-miR-6858 NM_0011052 TMC5  | 1 |
| hsa-miR-6861 NM_0011052 TMC5  | 1 |
| hsa-miR-6875 NM_0011052 TMC5  | 1 |
| hsa-miR-6878 NM_0011052 TMC5  | 1 |
| hsa-miR-6875 NM_0011052 TMC5  | 1 |
| hsa-miR-688C NM_0011052 TMC5  | 1 |
| hsa-miR-6881 NM_0011052 TMC5  | 1 |
| hsa-miR-6882 NM_0011052 TMC5  | 1 |
| hsa-miR-6883 NM_0011052 TMC5  | 1 |
| hsa-miR-716C NM_0011052 TMC5  | 1 |
| hsa-miR-716C NM_0011052 TMC5  | 1 |
| hsa-miR-7843 NM_0011052 TMC5  | 1 |
| hsa-miR-9903 NM_0011052 TMC5  | 1 |
| hsa-miR-1022 NM_0011052 TMC5  | 1 |
| hsa-miR-1118 NM_0011052 TMC5  | 1 |
| hsa-miR-1212 NM_0011052 TMC5  | 1 |
| hsa-let-7b-5p NM_0011052 TMC5 | 1 |
| hsa-let-7b-3p NM_0011052 TMC5 | 1 |
| hsa-let-7d-3p NM_0011052 TMC5 | 1 |
| hsa-miR-17-3j NM_0011052 TMC5 | 1 |
| hsa-miR-25-3j NM_0011052 TMC5 | 1 |
| hsa-miR-92a- NM_0011052 TMC5  | 1 |
| hsa-miR-93-3j NM_0011052 TMC5 | 1 |
| hsa-miR-34a- NM_0011052 TMC5  | 1 |
| hsa-miR-200b NM_0011052 TMC5  | 1 |
| hsa-miR-200b NM_0011052 TMC5  | 1 |
| hsa-let-7i-5p NM_0011052 TMC5 | 1 |
| hsa-miR-140- NM_0011052 TMC5  | 1 |
| hsa-miR-125b NM_0011052 TMC5  | 1 |
| hsa-miR-134- NM_0011052 TMC5  | 1 |
| hsa-miR-154- NM_0011052 TMC5  | 1 |
| hsa-miR-320a NM_0011052 TMC5  | 1 |
| hsa-miR-299- NM_0011052 TMC5  | 1 |
| hsa-miR-363- NM_0011052 TMC5  | 1 |
| hsa-miR-365b NM_0011052 TMC5  | 1 |
| hsa-miR-376a NM_0011052 TMC5  | 1 |
| hsa-miR-339- NM_0011052 TMC5  | 1 |
| hsa-miR-339- NM_0011052 TMC5  | 1 |
| hsa-miR-196b NM_0011052 TMC5  | 1 |
| hsa-miR-423- NM_0011052 TMC5  | 1 |
| hsa-miR-484 NM_0011052 TMC5   | 1 |
| hsa-miR-486- NM_0011052 TMC5  | 1 |
| hsa-miR-489- NM_0011052 TMC5  | 1 |
| hsa-miR-202- NM_0011052 TMC5  | 1 |
| hsa-miR-202- NM_0011052 TMC5  | 1 |
| hsa-miR-181d NM_0011052 TMC5  | 1 |
| hsa-miR-519e NM_0011052 TMC5  | 1 |
| hsa-miR-520b NM_0011052 TMC5  | 1 |
| hsa-miR-520g NM_0011052 TMC5  | 1 |
| hsa-miR-519a NM_0011052 TMC5  | 1 |
| hsa-miR-503- NM_0011052 TMC5  | 1 |
| hsa-miR-376a NM_0011052 TMC5  | 1 |
| hsa-miR-555 NM_0011052 TMC5   | 1 |
| hsa-miR-593- NM_0011052 TMC5  | 1 |
| hsa-miR-645 NM_0011052 TMC5   | 1 |
| hsa-miR-449b NM_0011052 TMC5  | 1 |
| hsa-miR-659- NM_0011052 TMC5  | 1 |
| hsa-miR-660- NM_0011052 TMC5  | 1 |
| hsa-miR-660- NM_0011052 TMC5  | 1 |

|                        |            |      |   |
|------------------------|------------|------|---|
| hsa-miR-542-NM_0011052 | TMC5       | 1    |   |
| hsa-miR-320b           | NM_0011052 | TMC5 | 1 |
| hsa-miR-1468           | NM_0011052 | TMC5 | 1 |
| hsa-miR-449c           | NM_0011052 | TMC5 | 1 |
| hsa-miR-769-           | NM_0011052 | TMC5 | 1 |
| hsa-miR-892b           | NM_0011052 | TMC5 | 1 |
| hsa-miR-509-           | NM_0011052 | TMC5 | 1 |
| hsa-miR-939-           | NM_0011052 | TMC5 | 1 |
| hsa-miR-1208           | NM_0011052 | TMC5 | 1 |
| hsa-miR-1303           | NM_0011052 | TMC5 | 1 |
| hsa-miR-1304           | NM_0011052 | TMC5 | 1 |
| hsa-miR-1261           | NM_0011052 | TMC5 | 1 |
| hsa-miR-548h           | NM_0011052 | TMC5 | 1 |
| hsa-miR-664a           | NM_0011052 | TMC5 | 1 |
| hsa-miR-1909           | NM_0011052 | TMC5 | 1 |
| hsa-miR-1915           | NM_0011052 | TMC5 | 1 |
| hsa-miR-2116           | NM_0011052 | TMC5 | 1 |
| hsa-miR-2682           | NM_0011052 | TMC5 | 1 |
| hsa-miR-312c           | NM_0011052 | TMC5 | 1 |
| hsa-miR-3127           | NM_0011052 | TMC5 | 1 |
| hsa-miR-314c           | NM_0011052 | TMC5 | 1 |
| hsa-miR-548u           | NM_0011052 | TMC5 | 1 |
| hsa-miR-3144           | NM_0011052 | TMC5 | 1 |
| hsa-miR-3151           | NM_0011052 | TMC5 | 1 |
| hsa-miR-3155           | NM_0011052 | TMC5 | 1 |
| hsa-miR-3184           | NM_0011052 | TMC5 | 1 |
| hsa-miR-3192           | NM_0011052 | TMC5 | 1 |
| hsa-miR-4294           | NM_0011052 | TMC5 | 1 |
| hsa-miR-4308           | NM_0011052 | TMC5 | 1 |
| hsa-miR-4326           | NM_0011052 | TMC5 | 1 |
| hsa-miR-4277           | NM_0011052 | TMC5 | 1 |
| hsa-miR-3622           | NM_0011052 | TMC5 | 1 |
| hsa-miR-3672           | NM_0011052 | TMC5 | 1 |
| hsa-miR-315c           | NM_0011052 | TMC5 | 1 |
| hsa-miR-4433           | NM_0011052 | TMC5 | 1 |
| hsa-miR-4437           | NM_0011052 | TMC5 | 1 |
| hsa-miR-4452           | NM_0011052 | TMC5 | 1 |
| hsa-miR-4458           | NM_0011052 | TMC5 | 1 |
| hsa-miR-3135           | NM_0011052 | TMC5 | 1 |
| hsa-miR-4472           | NM_0011052 | TMC5 | 1 |
| hsa-miR-4493           | NM_0011052 | TMC5 | 1 |
| hsa-miR-4512           | NM_0011052 | TMC5 | 1 |
| hsa-miR-4512           | NM_0011052 | TMC5 | 1 |
| hsa-miR-4523           | NM_0011052 | TMC5 | 1 |
| hsa-miR-4537           | NM_0011052 | TMC5 | 1 |
| hsa-miR-4641           | NM_0011052 | TMC5 | 1 |
| hsa-miR-4689           | NM_0011052 | TMC5 | 1 |
| hsa-miR-4716           | NM_0011052 | TMC5 | 1 |
| hsa-miR-3529           | NM_0011052 | TMC5 | 1 |
| hsa-miR-4726           | NM_0011052 | TMC5 | 1 |
| hsa-miR-473c           | NM_0011052 | TMC5 | 1 |
| hsa-miR-4733           | NM_0011052 | TMC5 | 1 |
| hsa-miR-3064           | NM_0011052 | TMC5 | 1 |
| hsa-miR-3064           | NM_0011052 | TMC5 | 1 |
| hsa-miR-474c           | NM_0011052 | TMC5 | 1 |
| hsa-miR-4748           | NM_0011052 | TMC5 | 1 |
| hsa-miR-4753           | NM_0011052 | TMC5 | 1 |
| hsa-miR-4757           | NM_0011052 | TMC5 | 1 |
| hsa-miR-4772           | NM_0011052 | TMC5 | 1 |
| hsa-miR-4774           | NM_0011052 | TMC5 | 1 |
| hsa-miR-2467           | NM_0011052 | TMC5 | 1 |
| hsa-miR-5001           | NM_0011052 | TMC5 | 1 |
| hsa-miR-5003           | NM_0011052 | TMC5 | 1 |
| hsa-miR-5003           | NM_0011052 | TMC5 | 1 |
| hsa-miR-5004           | NM_0011052 | TMC5 | 1 |
| hsa-miR-5007           | NM_0011052 | TMC5 | 1 |
| hsa-miR-4524           | NM_0011052 | TMC5 | 1 |
| hsa-miR-548a           | NM_0011052 | TMC5 | 1 |
| hsa-miR-664b           | NM_0011052 | TMC5 | 1 |
| hsa-miR-1295           | NM_0011052 | TMC5 | 1 |
| hsa-miR-5588           | NM_0011052 | TMC5 | 1 |
| hsa-miR-5682           | NM_0011052 | TMC5 | 1 |
| hsa-miR-5698           | NM_0011052 | TMC5 | 1 |
| hsa-miR-6068           | NM_0011052 | TMC5 | 1 |
| hsa-miR-6075           | NM_0011052 | TMC5 | 1 |
| hsa-miR-6086           | NM_0011052 | TMC5 | 1 |
| hsa-miR-651c           | NM_0011052 | TMC5 | 1 |
| hsa-miR-6715           | NM_0011052 | TMC5 | 1 |
| hsa-miR-6735           | NM_0011052 | TMC5 | 1 |
| hsa-miR-6735           | NM_0011052 | TMC5 | 1 |
| hsa-miR-674c           | NM_0011052 | TMC5 | 1 |
| hsa-miR-674c           | NM_0011052 | TMC5 | 1 |
| hsa-miR-6748           | NM_0011052 | TMC5 | 1 |
| hsa-miR-6748           | NM_0011052 | TMC5 | 1 |
| hsa-miR-6753           | NM_0011052 | TMC5 | 1 |
| hsa-miR-6754           | NM_0011052 | TMC5 | 1 |
| hsa-miR-6759           | NM_0011052 | TMC5 | 1 |
| hsa-miR-6763           | NM_0011052 | TMC5 | 1 |
| hsa-miR-6768           | NM_0011052 | TMC5 | 1 |
| hsa-miR-6769           | NM_0011052 | TMC5 | 1 |
| hsa-miR-6771           | NM_0011052 | TMC5 | 1 |
| hsa-miR-6771           | NM_0011052 | TMC5 | 1 |

|                              |            |
|------------------------------|------------|
| hsa-miR-6777 NM_0011052 TMC5 | 1          |
| hsa-miR-6780 NM_0011052 TMC5 | 1          |
| hsa-miR-6782 NM_0011052 TMC5 | 1          |
| hsa-miR-6787 NM_0011052 TMC5 | 1          |
| hsa-miR-6792 NM_0011052 TMC5 | 1          |
| hsa-miR-6794 NM_0011052 TMC5 | 1          |
| hsa-miR-6795 NM_0011052 TMC5 | 1          |
| hsa-miR-6798 NM_0011052 TMC5 | 1          |
| hsa-miR-6808 NM_0011052 TMC5 | 1          |
| hsa-miR-6817 NM_0011052 TMC5 | 1          |
| hsa-miR-6833 NM_0011052 TMC5 | 1          |
| hsa-miR-6837 NM_0011052 TMC5 | 1          |
| hsa-miR-6853 NM_0011052 TMC5 | 1          |
| hsa-miR-6854 NM_0011052 TMC5 | 1          |
| hsa-miR-6858 NM_0011052 TMC5 | 1          |
| hsa-miR-6861 NM_0011052 TMC5 | 1          |
| hsa-miR-6875 NM_0011052 TMC5 | 1          |
| hsa-miR-6878 NM_0011052 TMC5 | 1          |
| hsa-miR-6879 NM_0011052 TMC5 | 1          |
| hsa-miR-6880 NM_0011052 TMC5 | 1          |
| hsa-miR-6881 NM_0011052 TMC5 | 1          |
| hsa-miR-6882 NM_0011052 TMC5 | 1          |
| hsa-miR-6883 NM_0011052 TMC5 | 1          |
| hsa-miR-7160 NM_0011052 TMC5 | 1          |
| hsa-miR-7160 NM_0011052 TMC5 | 1          |
| hsa-miR-7843 NM_0011052 TMC5 | 1          |
| hsa-miR-8063 NM_0011052 TMC5 | 1          |
| hsa-miR-9903 NM_0011052 TMC5 | 1          |
| hsa-miR-1022 NM_0011052 TMC5 | 1          |
| hsa-miR-1118 NM_0011052 TMC5 | 1          |
| hsa-miR-1212 NM_0011052 TMC5 | 1          |
| hsa-miR-4482 NM_0011288 RRAD | 0.96153846 |
| hsa-miR-3174 NM_004165 RRAD  | 0.96923077 |
| hsa-miR-498- NM_0011288 RRAD | 0.97435897 |
| hsa-miR-6780 NM_004165 RRAD  | 0.98076923 |
| hsa-miR-652- NM_0011288 RRAD | 0.98076923 |
| hsa-miR-17-3j NM_004165 RRAD | 1          |
| hsa-miR-22-5j NM_004165 RRAD | 1          |
| hsa-miR-27a- NM_004165 RRAD  | 1          |
| hsa-miR-107 NM_004165 RRAD   | 1          |
| hsa-miR-124- NM_004165 RRAD  | 1          |
| hsa-miR-137- NM_004165 RRAD  | 1          |
| hsa-miR-127- NM_004165 RRAD  | 1          |
| hsa-miR-185- NM_004165 RRAD  | 1          |
| hsa-miR-185- NM_004165 RRAD  | 1          |
| hsa-miR-99b- NM_004165 RRAD  | 1          |
| hsa-miR-328- NM_004165 RRAD  | 1          |
| hsa-miR-324- NM_004165 RRAD  | 1          |
| hsa-miR-345- NM_004165 RRAD  | 1          |
| hsa-miR-346 NM_004165 RRAD   | 1          |
| hsa-miR-412- NM_004165 RRAD  | 1          |
| hsa-miR-483- NM_004165 RRAD  | 1          |
| hsa-miR-498- NM_004165 RRAD  | 1          |
| hsa-miR-519a NM_004165 RRAD  | 1          |
| hsa-miR-520a NM_004165 RRAD  | 1          |
| hsa-miR-525- NM_004165 RRAD  | 1          |
| hsa-miR-525- NM_004165 RRAD  | 1          |
| hsa-miR-520b NM_004165 RRAD  | 1          |
| hsa-miR-518c NM_004165 RRAD  | 1          |
| hsa-miR-524- NM_004165 RRAD  | 1          |
| hsa-miR-519d NM_004165 RRAD  | 1          |
| hsa-miR-520g NM_004165 RRAD  | 1          |
| hsa-miR-518d NM_004165 RRAD  | 1          |
| hsa-miR-520h NM_004165 RRAD  | 1          |
| hsa-miR-501- NM_004165 RRAD  | 1          |
| hsa-miR-502- NM_004165 RRAD  | 1          |
| hsa-miR-550a NM_004165 RRAD  | 1          |
| hsa-miR-550a NM_004165 RRAD  | 1          |
| hsa-miR-632 NM_004165 RRAD   | 1          |
| hsa-miR-646 NM_004165 RRAD   | 1          |
| hsa-miR-654- NM_004165 RRAD  | 1          |
| hsa-miR-671- NM_004165 RRAD  | 1          |
| hsa-miR-151b NM_004165 RRAD  | 1          |
| hsa-miR-1296 NM_004165 RRAD  | 1          |
| hsa-miR-766- NM_004165 RRAD  | 1          |
| hsa-miR-760 NM_004165 RRAD   | 1          |
| hsa-miR-933 NM_004165 RRAD   | 1          |
| hsa-miR-1226 NM_004165 RRAD  | 1          |
| hsa-miR-1226 NM_004165 RRAD  | 1          |
| hsa-miR-1289 NM_004165 RRAD  | 1          |
| hsa-miR-1249 NM_004165 RRAD  | 1          |
| hsa-miR-1275 NM_004165 RRAD  | 1          |
| hsa-miR-3124 NM_004165 RRAD  | 1          |
| hsa-miR-3147 NM_004165 RRAD  | 1          |
| hsa-miR-3194 NM_004165 RRAD  | 1          |
| hsa-miR-4294 NM_004165 RRAD  | 1          |
| hsa-miR-4319 NM_004165 RRAD  | 1          |
| hsa-miR-4322 NM_004165 RRAD  | 1          |
| hsa-miR-4324 NM_004165 RRAD  | 1          |
| hsa-miR-4265 NM_004165 RRAD  | 1          |
| hsa-miR-4265 NM_004165 RRAD  | 1          |
| hsa-miR-4287 NM_004165 RRAD  | 1          |
| hsa-miR-4287 NM_004165 RRAD  | 1          |
| hsa-miR-3917 NM_004165 RRAD  | 1          |

|                          |      |   |
|--------------------------|------|---|
| hsa-miR-4421 NM_004165   | RRAD | 1 |
| hsa-miR-4446 NM_004165   | RRAD | 1 |
| hsa-miR-4472 NM_004165   | RRAD | 1 |
| hsa-miR-4505 NM_004165   | RRAD | 1 |
| hsa-miR-4519 NM_004165   | RRAD | 1 |
| hsa-miR-4633 NM_004165   | RRAD | 1 |
| hsa-miR-4641 NM_004165   | RRAD | 1 |
| hsa-miR-4651 NM_004165   | RRAD | 1 |
| hsa-miR-4683 NM_004165   | RRAD | 1 |
| hsa-miR-4687 NM_004165   | RRAD | 1 |
| hsa-miR-4690 NM_004165   | RRAD | 1 |
| hsa-miR-4708 NM_004165   | RRAD | 1 |
| hsa-miR-4722 NM_004165   | RRAD | 1 |
| hsa-miR-4727 NM_004165   | RRAD | 1 |
| hsa-miR-4727 NM_004165   | RRAD | 1 |
| hsa-miR-4747 NM_004165   | RRAD | 1 |
| hsa-miR-4749 NM_004165   | RRAD | 1 |
| hsa-miR-5011 NM_004165   | RRAD | 1 |
| hsa-miR-5087 NM_004165   | RRAD | 1 |
| hsa-miR-5704 NM_004165   | RRAD | 1 |
| hsa-miR-6129 NM_004165   | RRAD | 1 |
| hsa-miR-6722 NM_004165   | RRAD | 1 |
| hsa-miR-6722 NM_004165   | RRAD | 1 |
| hsa-miR-6737 NM_004165   | RRAD | 1 |
| hsa-miR-6747 NM_004165   | RRAD | 1 |
| hsa-miR-6749 NM_004165   | RRAD | 1 |
| hsa-miR-6751 NM_004165   | RRAD | 1 |
| hsa-miR-6751 NM_004165   | RRAD | 1 |
| hsa-miR-6755 NM_004165   | RRAD | 1 |
| hsa-miR-6762 NM_004165   | RRAD | 1 |
| hsa-miR-6798 NM_004165   | RRAD | 1 |
| hsa-miR-6817 NM_004165   | RRAD | 1 |
| hsa-miR-6821 NM_004165   | RRAD | 1 |
| hsa-miR-6824 NM_004165   | RRAD | 1 |
| hsa-miR-6827 NM_004165   | RRAD | 1 |
| hsa-miR-6835 NM_004165   | RRAD | 1 |
| hsa-miR-6871 NM_004165   | RRAD | 1 |
| hsa-miR-7110 NM_004165   | RRAD | 1 |
| hsa-miR-7152 NM_004165   | RRAD | 1 |
| hsa-miR-8052 NM_004165   | RRAD | 1 |
| hsa-miR-8075 NM_004165   | RRAD | 1 |
| hsa-miR-8088 NM_004165   | RRAD | 1 |
| hsa-miR-8089 NM_004165   | RRAD | 1 |
| hsa-miR-1039 NM_004165   | RRAD | 1 |
| hsa-miR-1039 NM_004165   | RRAD | 1 |
| hsa-miR-1039 NM_004165   | RRAD | 1 |
| hsa-miR-1052 NM_004165   | RRAD | 1 |
| hsa-miR-1118 NM_004165   | RRAD | 1 |
| hsa-miR-9851 NM_004165   | RRAD | 1 |
| hsa-miR-1211 NM_004165   | RRAD | 1 |
| hsa-miR-1212 NM_004165   | RRAD | 1 |
| hsa-miR-22-5j NM_0011288 | RRAD | 1 |
| hsa-miR-27a- NM_0011288  | RRAD | 1 |
| hsa-miR-107 NM_0011288   | RRAD | 1 |
| hsa-miR-124- NM_0011288  | RRAD | 1 |
| hsa-miR-137- NM_0011288  | RRAD | 1 |
| hsa-miR-127- NM_0011288  | RRAD | 1 |
| hsa-miR-185- NM_0011288  | RRAD | 1 |
| hsa-miR-99b- NM_0011288  | RRAD | 1 |
| hsa-miR-328- NM_0011288  | RRAD | 1 |
| hsa-miR-324- NM_0011288  | RRAD | 1 |
| hsa-miR-345- NM_0011288  | RRAD | 1 |
| hsa-miR-412- NM_0011288  | RRAD | 1 |
| hsa-miR-483- NM_0011288  | RRAD | 1 |
| hsa-miR-519e NM_0011288  | RRAD | 1 |
| hsa-miR-520a NM_0011288  | RRAD | 1 |
| hsa-miR-526t NM_0011288  | RRAD | 1 |
| hsa-miR-525- NM_0011288  | RRAD | 1 |
| hsa-miR-525- NM_0011288  | RRAD | 1 |
| hsa-miR-520t NM_0011288  | RRAD | 1 |
| hsa-miR-526a NM_0011288  | RRAD | 1 |
| hsa-miR-518c NM_0011288  | RRAD | 1 |
| hsa-miR-524- NM_0011288  | RRAD | 1 |
| hsa-miR-519d NM_0011288  | RRAD | 1 |
| hsa-miR-520g NM_0011288  | RRAD | 1 |
| hsa-miR-518e NM_0011288  | RRAD | 1 |
| hsa-miR-518d NM_0011288  | RRAD | 1 |
| hsa-miR-550a NM_0011288  | RRAD | 1 |
| hsa-miR-596 NM_0011288   | RRAD | 1 |
| hsa-miR-632 NM_0011288   | RRAD | 1 |
| hsa-miR-646 NM_0011288   | RRAD | 1 |
| hsa-miR-654- NM_0011288  | RRAD | 1 |
| hsa-miR-671- NM_0011288  | RRAD | 1 |
| hsa-miR-151t NM_0011288  | RRAD | 1 |
| hsa-miR-1296 NM_0011288  | RRAD | 1 |
| hsa-miR-933 NM_0011288   | RRAD | 1 |
| hsa-miR-1226 NM_0011288  | RRAD | 1 |
| hsa-miR-1249 NM_0011288  | RRAD | 1 |
| hsa-miR-1275 NM_0011288  | RRAD | 1 |
| hsa-miR-3124 NM_0011288  | RRAD | 1 |
| hsa-miR-3147 NM_0011288  | RRAD | 1 |
| hsa-miR-3158 NM_0011288  | RRAD | 1 |
| hsa-miR-3194 NM_0011288  | RRAD | 1 |
| hsa-miR-4294 NM_0011288  | RRAD | 1 |



|                              |            |
|------------------------------|------------|
| hsa-miR-4322 NM_0011288 RRAD | 1          |
| hsa-miR-4324 NM_0011288 RRAD | 1          |
| hsa-miR-4265 NM_0011288 RRAD | 1          |
| hsa-miR-4265 NM_0011288 RRAD | 1          |
| hsa-miR-4287 NM_0011288 RRAD | 1          |
| hsa-miR-3180 NM_0011288 RRAD | 1          |
| hsa-miR-4421 NM_0011288 RRAD | 1          |
| hsa-miR-4469 NM_0011288 RRAD | 1          |
| hsa-miR-4505 NM_0011288 RRAD | 1          |
| hsa-miR-4515 NM_0011288 RRAD | 1          |
| hsa-miR-4633 NM_0011288 RRAD | 1          |
| hsa-miR-4641 NM_0011288 RRAD | 1          |
| hsa-miR-4683 NM_0011288 RRAD | 1          |
| hsa-miR-4690 NM_0011288 RRAD | 1          |
| hsa-miR-4708 NM_0011288 RRAD | 1          |
| hsa-miR-4722 NM_0011288 RRAD | 1          |
| hsa-miR-4727 NM_0011288 RRAD | 1          |
| hsa-miR-4747 NM_0011288 RRAD | 1          |
| hsa-miR-4749 NM_0011288 RRAD | 1          |
| hsa-miR-5006 NM_0011288 RRAD | 1          |
| hsa-miR-5011 NM_0011288 RRAD | 1          |
| hsa-miR-5087 NM_0011288 RRAD | 1          |
| hsa-miR-5591 NM_0011288 RRAD | 1          |
| hsa-miR-5691 NM_0011288 RRAD | 1          |
| hsa-miR-6129 NM_0011288 RRAD | 1          |
| hsa-miR-6495 NM_0011288 RRAD | 1          |
| hsa-miR-6513 NM_0011288 RRAD | 1          |
| hsa-miR-6722 NM_0011288 RRAD | 1          |
| hsa-miR-6722 NM_0011288 RRAD | 1          |
| hsa-miR-6734 NM_0011288 RRAD | 1          |
| hsa-miR-6737 NM_0011288 RRAD | 1          |
| hsa-miR-6747 NM_0011288 RRAD | 1          |
| hsa-miR-6749 NM_0011288 RRAD | 1          |
| hsa-miR-6751 NM_0011288 RRAD | 1          |
| hsa-miR-6751 NM_0011288 RRAD | 1          |
| hsa-miR-6755 NM_0011288 RRAD | 1          |
| hsa-miR-6762 NM_0011288 RRAD | 1          |
| hsa-miR-6806 NM_0011288 RRAD | 1          |
| hsa-miR-6817 NM_0011288 RRAD | 1          |
| hsa-miR-6821 NM_0011288 RRAD | 1          |
| hsa-miR-6824 NM_0011288 RRAD | 1          |
| hsa-miR-6827 NM_0011288 RRAD | 1          |
| hsa-miR-6835 NM_0011288 RRAD | 1          |
| hsa-miR-6780 NM_0011288 RRAD | 1          |
| hsa-miR-6871 NM_0011288 RRAD | 1          |
| hsa-miR-7110 NM_0011288 RRAD | 1          |
| hsa-miR-8052 NM_0011288 RRAD | 1          |
| hsa-miR-8085 NM_0011288 RRAD | 1          |
| hsa-miR-1039 NM_0011288 RRAD | 1          |
| hsa-miR-1039 NM_0011288 RRAD | 1          |
| hsa-miR-9851 NM_0011288 RRAD | 1          |
| hsa-miR-1211 NM_0011288 RRAD | 1          |
| hsa-miR-1212 NM_0011288 RRAD | 1          |
| hsa-miR-4316 NM_0012888 VRK2 | 0.95384615 |
| hsa-miR-4316 NM_0012888 VRK2 | 0.95384615 |
| hsa-miR-8085 XM_0067120 VRK2 | 0.95384615 |
| hsa-miR-4316 NM_006296 VRK2  | 0.95384615 |
| hsa-miR-4316 NM_0011304 VRK2 | 0.95384615 |
| hsa-miR-875- NM_0012888 VRK2 | 0.96153846 |
| hsa-miR-875- NM_0012888 VRK2 | 0.96153846 |
| hsa-miR-6762 NM_0012888 VRK2 | 0.96153846 |
| hsa-miR-6785 NM_0012888 VRK2 | 0.96153846 |
| hsa-miR-6848 NM_0012888 VRK2 | 0.96153846 |
| hsa-miR-8055 NM_0012888 VRK2 | 0.96153846 |
| hsa-miR-875- NM_0012888 VRK2 | 0.96153846 |
| hsa-miR-7107 NM_0012888 VRK2 | 0.96153846 |
| hsa-miR-493- XM_0067120 VRK2 | 0.96153846 |
| hsa-miR-616- XM_0067120 VRK2 | 0.96153846 |
| hsa-miR-320c XM_0067120 VRK2 | 0.96153846 |
| hsa-miR-875- XM_0067120 VRK2 | 0.96153846 |
| hsa-miR-147b XM_0067120 VRK2 | 0.96153846 |
| hsa-miR-4534 XM_0067120 VRK2 | 0.96153846 |
| hsa-miR-4700 XM_0067120 VRK2 | 0.96153846 |
| hsa-miR-4737 XM_0067120 VRK2 | 0.96153846 |
| hsa-miR-4743 XM_0067120 VRK2 | 0.96153846 |
| hsa-miR-6744 XM_0067120 VRK2 | 0.96153846 |
| hsa-miR-6760 XM_0067120 VRK2 | 0.96153846 |
| hsa-miR-6763 XM_0067120 VRK2 | 0.96153846 |
| hsa-miR-8055 XM_0067120 VRK2 | 0.96153846 |
| hsa-miR-875- NM_006296 VRK2  | 0.96153846 |
| hsa-miR-7107 NM_006296 VRK2  | 0.96153846 |
| hsa-miR-875- NM_0011304 VRK2 | 0.96153846 |
| hsa-miR-1276 NM_0012888 VRK2 | 0.97435897 |
| hsa-miR-1276 XM_0067120 VRK2 | 0.97435897 |
| hsa-miR-1039 NM_0012888 VRK2 | 0.98076923 |
| hsa-miR-1039 NM_0012888 VRK2 | 0.98076923 |
| hsa-miR-1039 NM_0012888 VRK2 | 0.98076923 |
| hsa-miR-1039 NM_006296 VRK2  | 0.98076923 |
| hsa-miR-1039 NM_0011304 VRK2 | 0.98076923 |
| hsa-miR-519c NM_0012888 VRK2 | 1          |
| hsa-miR-519t NM_0012888 VRK2 | 1          |
| hsa-miR-523- NM_0012888 VRK2 | 1          |
| hsa-miR-526a NM_0012888 VRK2 | 1          |
| hsa-miR-520c NM_0012888 VRK2 | 1          |

|                              |   |
|------------------------------|---|
| hsa-miR-518c NM_0012888 VRK2 | 1 |
| hsa-miR-516t NM_0012888 VRK2 | 1 |
| hsa-miR-518e NM_0012888 VRK2 | 1 |
| hsa-miR-518d NM_0012888 VRK2 | 1 |
| hsa-miR-522- NM_0012888 VRK2 | 1 |
| hsa-miR-519a NM_0012888 VRK2 | 1 |
| hsa-miR-934 NM_0012888 VRK2  | 1 |
| hsa-miR-1231 NM_0012888 VRK2 | 1 |
| hsa-miR-2117 NM_0012888 VRK2 | 1 |
| hsa-miR-430C NM_0012888 VRK2 | 1 |
| hsa-miR-4716 NM_0012888 VRK2 | 1 |
| hsa-miR-4784 NM_0012888 VRK2 | 1 |
| hsa-miR-6512 NM_0012888 VRK2 | 1 |
| hsa-miR-6748 NM_0012888 VRK2 | 1 |
| hsa-miR-6803 NM_0012888 VRK2 | 1 |
| hsa-miR-6868 NM_0012888 VRK2 | 1 |
| hsa-miR-6876 NM_0012888 VRK2 | 1 |
| hsa-miR-6894 NM_0012888 VRK2 | 1 |
| hsa-miR-8082 NM_0012888 VRK2 | 1 |
| hsa-miR-188- NM_0012888 VRK2 | 1 |
| hsa-miR-193a NM_0012888 VRK2 | 1 |
| hsa-miR-383- NM_0012888 VRK2 | 1 |
| hsa-miR-324- NM_0012888 VRK2 | 1 |
| hsa-miR-494- NM_0012888 VRK2 | 1 |
| hsa-miR-519c NM_0012888 VRK2 | 1 |
| hsa-miR-519t NM_0012888 VRK2 | 1 |
| hsa-miR-523- NM_0012888 VRK2 | 1 |
| hsa-miR-526a NM_0012888 VRK2 | 1 |
| hsa-miR-520c NM_0012888 VRK2 | 1 |
| hsa-miR-518c NM_0012888 VRK2 | 1 |
| hsa-miR-516t NM_0012888 VRK2 | 1 |
| hsa-miR-518e NM_0012888 VRK2 | 1 |
| hsa-miR-518d NM_0012888 VRK2 | 1 |
| hsa-miR-522- NM_0012888 VRK2 | 1 |
| hsa-miR-519a NM_0012888 VRK2 | 1 |
| hsa-miR-487t NM_0012888 VRK2 | 1 |
| hsa-miR-623 NM_0012888 VRK2  | 1 |
| hsa-miR-670- NM_0012888 VRK2 | 1 |
| hsa-miR-934 NM_0012888 VRK2  | 1 |
| hsa-miR-1231 NM_0012888 VRK2 | 1 |
| hsa-miR-1238 NM_0012888 VRK2 | 1 |
| hsa-miR-1295 NM_0012888 VRK2 | 1 |
| hsa-miR-1263 NM_0012888 VRK2 | 1 |
| hsa-miR-2117 NM_0012888 VRK2 | 1 |
| hsa-miR-3125 NM_0012888 VRK2 | 1 |
| hsa-miR-317C NM_0012888 VRK2 | 1 |
| hsa-miR-319C NM_0012888 VRK2 | 1 |
| hsa-miR-3192 NM_0012888 VRK2 | 1 |
| hsa-miR-430C NM_0012888 VRK2 | 1 |
| hsa-miR-3605 NM_0012888 VRK2 | 1 |
| hsa-miR-3681 NM_0012888 VRK2 | 1 |
| hsa-miR-3683 NM_0012888 VRK2 | 1 |
| hsa-miR-3685 NM_0012888 VRK2 | 1 |
| hsa-miR-3685 NM_0012888 VRK2 | 1 |
| hsa-miR-3936 NM_0012888 VRK2 | 1 |
| hsa-miR-442C NM_0012888 VRK2 | 1 |
| hsa-miR-4463 NM_0012888 VRK2 | 1 |
| hsa-miR-3685 NM_0012888 VRK2 | 1 |
| hsa-miR-4481 NM_0012888 VRK2 | 1 |
| hsa-miR-4491 NM_0012888 VRK2 | 1 |
| hsa-miR-4521 NM_0012888 VRK2 | 1 |
| hsa-miR-4632 NM_0012888 VRK2 | 1 |
| hsa-miR-4655 NM_0012888 VRK2 | 1 |
| hsa-miR-4661 NM_0012888 VRK2 | 1 |
| hsa-miR-4701 NM_0012888 VRK2 | 1 |
| hsa-miR-4716 NM_0012888 VRK2 | 1 |
| hsa-miR-4742 NM_0012888 VRK2 | 1 |
| hsa-miR-4753 NM_0012888 VRK2 | 1 |
| hsa-miR-4784 NM_0012888 VRK2 | 1 |
| hsa-miR-4995 NM_0012888 VRK2 | 1 |
| hsa-miR-519C NM_0012888 VRK2 | 1 |
| hsa-miR-5588 NM_0012888 VRK2 | 1 |
| hsa-miR-5695 NM_0012888 VRK2 | 1 |
| hsa-miR-6076 NM_0012888 VRK2 | 1 |
| hsa-miR-6077 NM_0012888 VRK2 | 1 |
| hsa-miR-6078 NM_0012888 VRK2 | 1 |
| hsa-miR-6512 NM_0012888 VRK2 | 1 |
| hsa-miR-6728 NM_0012888 VRK2 | 1 |
| hsa-miR-6748 NM_0012888 VRK2 | 1 |
| hsa-miR-6755 NM_0012888 VRK2 | 1 |
| hsa-miR-6772 NM_0012888 VRK2 | 1 |
| hsa-miR-6803 NM_0012888 VRK2 | 1 |
| hsa-miR-6815 NM_0012888 VRK2 | 1 |
| hsa-miR-6824 NM_0012888 VRK2 | 1 |
| hsa-miR-6825 NM_0012888 VRK2 | 1 |
| hsa-miR-6834 NM_0012888 VRK2 | 1 |
| hsa-miR-6837 NM_0012888 VRK2 | 1 |
| hsa-miR-6845 NM_0012888 VRK2 | 1 |
| hsa-miR-6861 NM_0012888 VRK2 | 1 |
| hsa-miR-6868 NM_0012888 VRK2 | 1 |
| hsa-miR-6876 NM_0012888 VRK2 | 1 |
| hsa-miR-6882 NM_0012888 VRK2 | 1 |
| hsa-miR-6887 NM_0012888 VRK2 | 1 |
| hsa-miR-6894 NM_0012888 VRK2 | 1 |

|                               |   |
|-------------------------------|---|
| hsa-miR-7851 NM_0012888 VRK2  | 1 |
| hsa-miR-7851 NM_0012888 VRK2  | 1 |
| hsa-miR-8070 NM_0012888 VRK2  | 1 |
| hsa-miR-8082 NM_0012888 VRK2  | 1 |
| hsa-miR-8087 NM_0012888 VRK2  | 1 |
| hsa-miR-9718 NM_0012888 VRK2  | 1 |
| hsa-miR-1140 NM_0012888 VRK2  | 1 |
| hsa-miR-204-1 NM_0012888 VRK2 | 1 |
| hsa-miR-519c NM_0012888 VRK2  | 1 |
| hsa-miR-519b NM_0012888 VRK2  | 1 |
| hsa-miR-523-1 NM_0012888 VRK2 | 1 |
| hsa-miR-526a NM_0012888 VRK2  | 1 |
| hsa-miR-520c NM_0012888 VRK2  | 1 |
| hsa-miR-518c NM_0012888 VRK2  | 1 |
| hsa-miR-516t NM_0012888 VRK2  | 1 |
| hsa-miR-518e NM_0012888 VRK2  | 1 |
| hsa-miR-518d NM_0012888 VRK2  | 1 |
| hsa-miR-522-1 NM_0012888 VRK2 | 1 |
| hsa-miR-519a NM_0012888 VRK2  | 1 |
| hsa-miR-1231 NM_0012888 VRK2  | 1 |
| hsa-miR-4300 NM_0012888 VRK2  | 1 |
| hsa-miR-4316 NM_0012888 VRK2  | 1 |
| hsa-miR-3675 NM_0012888 VRK2  | 1 |
| hsa-miR-4472 NM_0012888 VRK2  | 1 |
| hsa-miR-4716 NM_0012888 VRK2  | 1 |
| hsa-miR-4747 NM_0012888 VRK2  | 1 |
| hsa-miR-4784 NM_0012888 VRK2  | 1 |
| hsa-miR-5190 NM_0012888 VRK2  | 1 |
| hsa-miR-6165 NM_0012888 VRK2  | 1 |
| hsa-miR-6512 NM_0012888 VRK2  | 1 |
| hsa-miR-6740 NM_0012888 VRK2  | 1 |
| hsa-miR-6797 NM_0012888 VRK2  | 1 |
| hsa-miR-6801 NM_0012888 VRK2  | 1 |
| hsa-miR-6802 NM_0012888 VRK2  | 1 |
| hsa-miR-6812 NM_0012888 VRK2  | 1 |
| hsa-miR-6815 NM_0012888 VRK2  | 1 |
| hsa-miR-6876 NM_0012888 VRK2  | 1 |
| hsa-miR-6894 NM_0012888 VRK2  | 1 |
| hsa-miR-7851 NM_0012888 VRK2  | 1 |
| hsa-let-7b-5p XM_0067120 VRK2 | 1 |
| hsa-let-7e-5p XM_0067120 VRK2 | 1 |
| hsa-miR-23a-1 XM_0067120 VRK2 | 1 |
| hsa-miR-92a-1 XM_0067120 VRK2 | 1 |
| hsa-miR-98-5j XM_0067120 VRK2 | 1 |
| hsa-miR-29b-1 XM_0067120 VRK2 | 1 |
| hsa-miR-106a XM_0067120 VRK2  | 1 |
| hsa-miR-183-1 XM_0067120 VRK2 | 1 |
| hsa-miR-204-1 XM_0067120 VRK2 | 1 |
| hsa-let-7g-5p XM_0067120 VRK2 | 1 |
| hsa-let-7i-5p XM_0067120 VRK2 | 1 |
| hsa-miR-125b XM_0067120 VRK2  | 1 |
| hsa-miR-138-1 XM_0067120 VRK2 | 1 |
| hsa-miR-125a XM_0067120 VRK2  | 1 |
| hsa-miR-127-1 XM_0067120 VRK2 | 1 |
| hsa-miR-149-1 XM_0067120 VRK2 | 1 |
| hsa-miR-185-1 XM_0067120 VRK2 | 1 |
| hsa-miR-320a XM_0067120 VRK2  | 1 |
| hsa-miR-128-1 XM_0067120 VRK2 | 1 |
| hsa-miR-361-1 XM_0067120 VRK2 | 1 |
| hsa-miR-365t XM_0067120 VRK2  | 1 |
| hsa-miR-378a XM_0067120 VRK2  | 1 |
| hsa-miR-383-1 XM_0067120 VRK2 | 1 |
| hsa-miR-342-1 XM_0067120 VRK2 | 1 |
| hsa-miR-148t XM_0067120 VRK2  | 1 |
| hsa-miR-324-1 XM_0067120 VRK2 | 1 |
| hsa-miR-422a XM_0067120 VRK2  | 1 |
| hsa-miR-423-1 XM_0067120 VRK2 | 1 |
| hsa-miR-329-1 XM_0067120 VRK2 | 1 |
| hsa-miR-511-1 XM_0067120 VRK2 | 1 |
| hsa-miR-494-1 XM_0067120 VRK2 | 1 |
| hsa-miR-518c XM_0067120 VRK2  | 1 |
| hsa-miR-517-1 XM_0067120 VRK2 | 1 |
| hsa-miR-517a XM_0067120 VRK2  | 1 |
| hsa-miR-517b XM_0067120 VRK2  | 1 |
| hsa-miR-520g XM_0067120 VRK2  | 1 |
| hsa-miR-516t XM_0067120 VRK2  | 1 |
| hsa-miR-501-1 XM_0067120 VRK2 | 1 |
| hsa-miR-503-1 XM_0067120 VRK2 | 1 |
| hsa-miR-504-1 XM_0067120 VRK2 | 1 |
| hsa-miR-455-1 XM_0067120 VRK2 | 1 |
| hsa-miR-550a XM_0067120 VRK2  | 1 |
| hsa-miR-595 XM_0067120 VRK2   | 1 |
| hsa-miR-598-1 XM_0067120 VRK2 | 1 |
| hsa-miR-619-1 XM_0067120 VRK2 | 1 |
| hsa-miR-622 XM_0067120 VRK2   | 1 |
| hsa-miR-33b-1 XM_0067120 VRK2 | 1 |
| hsa-miR-659-1 XM_0067120 VRK2 | 1 |
| hsa-miR-320t XM_0067120 VRK2  | 1 |
| hsa-miR-766-1 XM_0067120 VRK2 | 1 |
| hsa-miR-670-1 XM_0067120 VRK2 | 1 |
| hsa-miR-541-1 XM_0067120 VRK2 | 1 |
| hsa-miR-744-1 XM_0067120 VRK2 | 1 |
| hsa-miR-885-1 XM_0067120 VRK2 | 1 |
| hsa-miR-921 XM_0067120 VRK2   | 1 |

|                              |   |
|------------------------------|---|
| hsa-miR-922 XM_0067120 VRK2  | 1 |
| hsa-miR-937 XM_0067120 VRK2  | 1 |
| hsa-miR-939 XM_0067120 VRK2  | 1 |
| hsa-miR-1228 XM_0067120 VRK2 | 1 |
| hsa-miR-1294 XM_0067120 VRK2 | 1 |
| hsa-miR-1295 XM_0067120 VRK2 | 1 |
| hsa-miR-1245 XM_0067120 VRK2 | 1 |
| hsa-miR-1268 XM_0067120 VRK2 | 1 |
| hsa-miR-1288 XM_0067120 VRK2 | 1 |
| hsa-miR-320c XM_0067120 VRK2 | 1 |
| hsa-miR-1909 XM_0067120 VRK2 | 1 |
| hsa-miR-2276 XM_0067120 VRK2 | 1 |
| hsa-miR-2278 XM_0067120 VRK2 | 1 |
| hsa-miR-3131 XM_0067120 VRK2 | 1 |
| hsa-miR-544t XM_0067120 VRK2 | 1 |
| hsa-miR-3138 XM_0067120 VRK2 | 1 |
| hsa-miR-3138 XM_0067120 VRK2 | 1 |
| hsa-miR-3141 XM_0067120 VRK2 | 1 |
| hsa-miR-3145 XM_0067120 VRK2 | 1 |
| hsa-miR-3165 XM_0067120 VRK2 | 1 |
| hsa-miR-3165 XM_0067120 VRK2 | 1 |
| hsa-miR-3170 XM_0067120 VRK2 | 1 |
| hsa-miR-3170 XM_0067120 VRK2 | 1 |
| hsa-miR-3065 XM_0067120 VRK2 | 1 |
| hsa-miR-3190 XM_0067120 VRK2 | 1 |
| hsa-miR-3192 XM_0067120 VRK2 | 1 |
| hsa-miR-3192 XM_0067120 VRK2 | 1 |
| hsa-miR-3200 XM_0067120 VRK2 | 1 |
| hsa-miR-4298 XM_0067120 VRK2 | 1 |
| hsa-miR-4316 XM_0067120 VRK2 | 1 |
| hsa-miR-4257 XM_0067120 VRK2 | 1 |
| hsa-miR-4265 XM_0067120 VRK2 | 1 |
| hsa-miR-500t XM_0067120 VRK2 | 1 |
| hsa-miR-3615 XM_0067120 VRK2 | 1 |
| hsa-miR-3675 XM_0067120 VRK2 | 1 |
| hsa-miR-3675 XM_0067120 VRK2 | 1 |
| hsa-miR-3681 XM_0067120 VRK2 | 1 |
| hsa-miR-3682 XM_0067120 VRK2 | 1 |
| hsa-miR-550t XM_0067120 VRK2 | 1 |
| hsa-miR-4420 XM_0067120 VRK2 | 1 |
| hsa-miR-4422 XM_0067120 VRK2 | 1 |
| hsa-miR-4433 XM_0067120 VRK2 | 1 |
| hsa-miR-4435 XM_0067120 VRK2 | 1 |
| hsa-miR-4437 XM_0067120 VRK2 | 1 |
| hsa-miR-4442 XM_0067120 VRK2 | 1 |
| hsa-miR-4448 XM_0067120 VRK2 | 1 |
| hsa-miR-4450 XM_0067120 VRK2 | 1 |
| hsa-miR-4450 XM_0067120 VRK2 | 1 |
| hsa-miR-4463 XM_0067120 VRK2 | 1 |
| hsa-miR-4471 XM_0067120 VRK2 | 1 |
| hsa-miR-4474 XM_0067120 VRK2 | 1 |
| hsa-miR-4476 XM_0067120 VRK2 | 1 |
| hsa-miR-4481 XM_0067120 VRK2 | 1 |
| hsa-miR-4485 XM_0067120 VRK2 | 1 |
| hsa-miR-4500 XM_0067120 VRK2 | 1 |
| hsa-miR-4506 XM_0067120 VRK2 | 1 |
| hsa-miR-2392 XM_0067120 VRK2 | 1 |
| hsa-miR-4510 XM_0067120 VRK2 | 1 |
| hsa-miR-4516 XM_0067120 VRK2 | 1 |
| hsa-miR-4519 XM_0067120 VRK2 | 1 |
| hsa-miR-4524 XM_0067120 VRK2 | 1 |
| hsa-miR-4526 XM_0067120 VRK2 | 1 |
| hsa-miR-4643 XM_0067120 VRK2 | 1 |
| hsa-miR-4647 XM_0067120 VRK2 | 1 |
| hsa-miR-4651 XM_0067120 VRK2 | 1 |
| hsa-miR-4654 XM_0067120 VRK2 | 1 |
| hsa-miR-4655 XM_0067120 VRK2 | 1 |
| hsa-miR-4664 XM_0067120 VRK2 | 1 |
| hsa-miR-4669 XM_0067120 VRK2 | 1 |
| hsa-miR-4676 XM_0067120 VRK2 | 1 |
| hsa-miR-4681 XM_0067120 VRK2 | 1 |
| hsa-miR-4691 XM_0067120 VRK2 | 1 |
| hsa-miR-4692 XM_0067120 VRK2 | 1 |
| hsa-miR-4695 XM_0067120 VRK2 | 1 |
| hsa-miR-4711 XM_0067120 VRK2 | 1 |
| hsa-miR-4711 XM_0067120 VRK2 | 1 |
| hsa-miR-4715 XM_0067120 VRK2 | 1 |
| hsa-miR-4716 XM_0067120 VRK2 | 1 |
| hsa-miR-4716 XM_0067120 VRK2 | 1 |
| hsa-miR-4716 XM_0067120 VRK2 | 1 |
| hsa-miR-4724 XM_0067120 VRK2 | 1 |
| hsa-miR-4728 XM_0067120 VRK2 | 1 |
| hsa-miR-4731 XM_0067120 VRK2 | 1 |
| hsa-miR-4742 XM_0067120 VRK2 | 1 |
| hsa-miR-4743 XM_0067120 VRK2 | 1 |
| hsa-miR-4747 XM_0067120 VRK2 | 1 |
| hsa-miR-4749 XM_0067120 VRK2 | 1 |
| hsa-miR-4753 XM_0067120 VRK2 | 1 |
| hsa-miR-4776 XM_0067120 VRK2 | 1 |
| hsa-miR-4776 XM_0067120 VRK2 | 1 |
| hsa-miR-1245 XM_0067120 VRK2 | 1 |
| hsa-miR-2467 XM_0067120 VRK2 | 1 |
| hsa-miR-2467 XM_0067120 VRK2 | 1 |
| hsa-miR-4786 XM_0067120 VRK2 | 1 |

|                              |   |
|------------------------------|---|
| hsa-miR-4793 XM_0067120 VRK2 | 1 |
| hsa-miR-5003 XM_0067120 VRK2 | 1 |
| hsa-miR-5004 XM_0067120 VRK2 | 1 |
| hsa-miR-5006 XM_0067120 VRK2 | 1 |
| hsa-miR-5008 XM_0067120 VRK2 | 1 |
| hsa-miR-5008 XM_0067120 VRK2 | 1 |
| hsa-miR-509C XM_0067120 VRK2 | 1 |
| hsa-miR-5192 XM_0067120 VRK2 | 1 |
| hsa-miR-558C XM_0067120 VRK2 | 1 |
| hsa-miR-5582 XM_0067120 VRK2 | 1 |
| hsa-miR-1295 XM_0067120 VRK2 | 1 |
| hsa-miR-5588 XM_0067120 VRK2 | 1 |
| hsa-miR-5693 XM_0067120 VRK2 | 1 |
| hsa-miR-5695 XM_0067120 VRK2 | 1 |
| hsa-miR-6086 XM_0067120 VRK2 | 1 |
| hsa-miR-6085 XM_0067120 VRK2 | 1 |
| hsa-miR-609C XM_0067120 VRK2 | 1 |
| hsa-miR-6132 XM_0067120 VRK2 | 1 |
| hsa-miR-6165 XM_0067120 VRK2 | 1 |
| hsa-miR-651C XM_0067120 VRK2 | 1 |
| hsa-miR-6512 XM_0067120 VRK2 | 1 |
| hsa-miR-6716 XM_0067120 VRK2 | 1 |
| hsa-miR-6717 XM_0067120 VRK2 | 1 |
| hsa-miR-6718 XM_0067120 VRK2 | 1 |
| hsa-miR-6728 XM_0067120 VRK2 | 1 |
| hsa-miR-673C XM_0067120 VRK2 | 1 |
| hsa-miR-6732 XM_0067120 VRK2 | 1 |
| hsa-miR-6734 XM_0067120 VRK2 | 1 |
| hsa-miR-6736 XM_0067120 VRK2 | 1 |
| hsa-miR-6742 XM_0067120 VRK2 | 1 |
| hsa-miR-6743 XM_0067120 VRK2 | 1 |
| hsa-miR-6753 XM_0067120 VRK2 | 1 |
| hsa-miR-6753 XM_0067120 VRK2 | 1 |
| hsa-miR-6756 XM_0067120 VRK2 | 1 |
| hsa-miR-6755 XM_0067120 VRK2 | 1 |
| hsa-miR-6772 XM_0067120 VRK2 | 1 |
| hsa-miR-6775 XM_0067120 VRK2 | 1 |
| hsa-miR-6777 XM_0067120 VRK2 | 1 |
| hsa-miR-678C XM_0067120 VRK2 | 1 |
| hsa-miR-6781 XM_0067120 VRK2 | 1 |
| hsa-miR-6782 XM_0067120 VRK2 | 1 |
| hsa-miR-679C XM_0067120 VRK2 | 1 |
| hsa-miR-6791 XM_0067120 VRK2 | 1 |
| hsa-miR-6792 XM_0067120 VRK2 | 1 |
| hsa-miR-6794 XM_0067120 VRK2 | 1 |
| hsa-miR-6795 XM_0067120 VRK2 | 1 |
| hsa-miR-6795 XM_0067120 VRK2 | 1 |
| hsa-miR-6802 XM_0067120 VRK2 | 1 |
| hsa-miR-6803 XM_0067120 VRK2 | 1 |
| hsa-miR-6803 XM_0067120 VRK2 | 1 |
| hsa-miR-6807 XM_0067120 VRK2 | 1 |
| hsa-miR-6808 XM_0067120 VRK2 | 1 |
| hsa-miR-6814 XM_0067120 VRK2 | 1 |
| hsa-miR-6824 XM_0067120 VRK2 | 1 |
| hsa-miR-6824 XM_0067120 VRK2 | 1 |
| hsa-miR-6825 XM_0067120 VRK2 | 1 |
| hsa-miR-6825 XM_0067120 VRK2 | 1 |
| hsa-miR-6834 XM_0067120 VRK2 | 1 |
| hsa-miR-678C XM_0067120 VRK2 | 1 |
| hsa-miR-678C XM_0067120 VRK2 | 1 |
| hsa-miR-6837 XM_0067120 VRK2 | 1 |
| hsa-miR-6841 XM_0067120 VRK2 | 1 |
| hsa-miR-6848 XM_0067120 VRK2 | 1 |
| hsa-miR-6845 XM_0067120 VRK2 | 1 |
| hsa-miR-6851 XM_0067120 VRK2 | 1 |
| hsa-miR-6855 XM_0067120 VRK2 | 1 |
| hsa-miR-6857 XM_0067120 VRK2 | 1 |
| hsa-miR-6862 XM_0067120 VRK2 | 1 |
| hsa-miR-6865 XM_0067120 VRK2 | 1 |
| hsa-miR-6868 XM_0067120 VRK2 | 1 |
| hsa-miR-6871 XM_0067120 VRK2 | 1 |
| hsa-miR-6873 XM_0067120 VRK2 | 1 |
| hsa-miR-6883 XM_0067120 VRK2 | 1 |
| hsa-miR-6883 XM_0067120 VRK2 | 1 |
| hsa-miR-6887 XM_0067120 VRK2 | 1 |
| hsa-miR-6888 XM_0067120 VRK2 | 1 |
| hsa-miR-689C XM_0067120 VRK2 | 1 |
| hsa-miR-6893 XM_0067120 VRK2 | 1 |
| hsa-miR-7106 XM_0067120 VRK2 | 1 |
| hsa-miR-7107 XM_0067120 VRK2 | 1 |
| hsa-miR-715C XM_0067120 VRK2 | 1 |
| hsa-miR-7156 XM_0067120 VRK2 | 1 |
| hsa-miR-7162 XM_0067120 VRK2 | 1 |
| hsa-miR-4433 XM_0067120 VRK2 | 1 |
| hsa-miR-7847 XM_0067120 VRK2 | 1 |
| hsa-miR-8052 XM_0067120 VRK2 | 1 |
| hsa-miR-806C XM_0067120 VRK2 | 1 |
| hsa-miR-8065 XM_0067120 VRK2 | 1 |
| hsa-miR-807C XM_0067120 VRK2 | 1 |
| hsa-miR-8072 XM_0067120 VRK2 | 1 |
| hsa-miR-8077 XM_0067120 VRK2 | 1 |
| hsa-miR-8075 XM_0067120 VRK2 | 1 |
| hsa-miR-9718 XM_0067120 VRK2 | 1 |
| hsa-miR-9902 XM_0067120 VRK2 | 1 |

|                               |            |
|-------------------------------|------------|
| hsa-miR-1022 XM_0067120 VRK2  | 1          |
| hsa-miR-1052 XM_0067120 VRK2  | 1          |
| hsa-miR-114C XM_0067120 VRK2  | 1          |
| hsa-miR-9851 XM_0067120 VRK2  | 1          |
| hsa-miR-1211 XM_0067120 VRK2  | 1          |
| hsa-miR-1211 XM_0067120 VRK2  | 1          |
| hsa-miR-519c NM_006296 VRK2   | 1          |
| hsa-miR-519t NM_006296 VRK2   | 1          |
| hsa-miR-523- NM_006296 VRK2   | 1          |
| hsa-miR-518f NM_006296 VRK2   | 1          |
| hsa-miR-526a NM_006296 VRK2   | 1          |
| hsa-miR-520c NM_006296 VRK2   | 1          |
| hsa-miR-518c NM_006296 VRK2   | 1          |
| hsa-miR-517- NM_006296 VRK2   | 1          |
| hsa-miR-516t NM_006296 VRK2   | 1          |
| hsa-miR-518e NM_006296 VRK2   | 1          |
| hsa-miR-518d NM_006296 VRK2   | 1          |
| hsa-miR-522- NM_006296 VRK2   | 1          |
| hsa-miR-519a NM_006296 VRK2   | 1          |
| hsa-miR-920 NM_006296 VRK2    | 1          |
| hsa-miR-934 NM_006296 VRK2    | 1          |
| hsa-miR-1231 NM_006296 VRK2   | 1          |
| hsa-miR-2117 NM_006296 VRK2   | 1          |
| hsa-miR-3156 NM_006296 VRK2   | 1          |
| hsa-miR-3679 NM_006296 VRK2   | 1          |
| hsa-miR-4472 NM_006296 VRK2   | 1          |
| hsa-miR-4716 NM_006296 VRK2   | 1          |
| hsa-miR-4747 NM_006296 VRK2   | 1          |
| hsa-miR-4784 NM_006296 VRK2   | 1          |
| hsa-miR-6165 NM_006296 VRK2   | 1          |
| hsa-miR-674C NM_006296 VRK2   | 1          |
| hsa-miR-6748 NM_006296 VRK2   | 1          |
| hsa-miR-6802 NM_006296 VRK2   | 1          |
| hsa-miR-6812 NM_006296 VRK2   | 1          |
| hsa-miR-6819 NM_006296 VRK2   | 1          |
| hsa-miR-6868 NM_006296 VRK2   | 1          |
| hsa-miR-6876 NM_006296 VRK2   | 1          |
| hsa-miR-7851 NM_006296 VRK2   | 1          |
| hsa-miR-519c NM_0011304 VRK2  | 1          |
| hsa-miR-519t NM_0011304 VRK2  | 1          |
| hsa-miR-523- NM_0011304 VRK2  | 1          |
| hsa-miR-518f NM_0011304 VRK2  | 1          |
| hsa-miR-526a NM_0011304 VRK2  | 1          |
| hsa-miR-520c NM_0011304 VRK2  | 1          |
| hsa-miR-518c NM_0011304 VRK2  | 1          |
| hsa-miR-517- NM_0011304 VRK2  | 1          |
| hsa-miR-516t NM_0011304 VRK2  | 1          |
| hsa-miR-518e NM_0011304 VRK2  | 1          |
| hsa-miR-518d NM_0011304 VRK2  | 1          |
| hsa-miR-522- NM_0011304 VRK2  | 1          |
| hsa-miR-519a NM_0011304 VRK2  | 1          |
| hsa-miR-934 NM_0011304 VRK2   | 1          |
| hsa-miR-1231 NM_0011304 VRK2  | 1          |
| hsa-miR-1324 NM_0011304 VRK2  | 1          |
| hsa-miR-2117 NM_0011304 VRK2  | 1          |
| hsa-miR-3156 NM_0011304 VRK2  | 1          |
| hsa-miR-3169 NM_0011304 VRK2  | 1          |
| hsa-miR-3679 NM_0011304 VRK2  | 1          |
| hsa-miR-4716 NM_0011304 VRK2  | 1          |
| hsa-miR-4784 NM_0011304 VRK2  | 1          |
| hsa-miR-6165 NM_0011304 VRK2  | 1          |
| hsa-miR-674C NM_0011304 VRK2  | 1          |
| hsa-miR-6748 NM_0011304 VRK2  | 1          |
| hsa-miR-6797 NM_0011304 VRK2  | 1          |
| hsa-miR-6802 NM_0011304 VRK2  | 1          |
| hsa-miR-6868 NM_0011304 VRK2  | 1          |
| hsa-miR-6876 NM_0011304 VRK2  | 1          |
| hsa-miR-200c NM_0013080 MEF2C | 0.95384615 |
| hsa-miR-1234 NM_0013080 MEF2C | 0.95384615 |
| hsa-miR-4531 NM_0013080 MEF2C | 0.95384615 |
| hsa-miR-4703 NM_0013080 MEF2C | 0.95384615 |
| hsa-miR-5696 NM_0013080 MEF2C | 0.95384615 |
| hsa-miR-6741 NM_0013080 MEF2C | 0.95384615 |
| hsa-miR-6744 NM_0013080 MEF2C | 0.95384615 |
| hsa-miR-8485 NM_0013080 MEF2C | 0.95384615 |
| hsa-miR-5696 NM_002397 MEF2C  | 0.95384615 |
| hsa-miR-6744 NM_002397 MEF2C  | 0.95384615 |
| hsa-miR-1296 NM_0013643 MEF2C | 0.95384615 |
| hsa-miR-4664 NM_0013643 MEF2C | 0.95384615 |
| hsa-miR-4703 NM_0013643 MEF2C | 0.95384615 |
| hsa-miR-5696 NM_0013643 MEF2C | 0.95384615 |
| hsa-miR-6821 NM_0013643 MEF2C | 0.95384615 |
| hsa-miR-7854 NM_0013643 MEF2C | 0.95384615 |
| hsa-miR-200c NM_0013643 MEF2C | 0.95384615 |
| hsa-miR-1234 NM_0013643 MEF2C | 0.95384615 |
| hsa-miR-4531 NM_0013643 MEF2C | 0.95384615 |
| hsa-miR-5696 NM_0013643 MEF2C | 0.95384615 |
| hsa-miR-6741 NM_0013643 MEF2C | 0.95384615 |
| hsa-miR-6744 NM_0013643 MEF2C | 0.95384615 |
| hsa-miR-6827 NM_0013643 MEF2C | 0.95384615 |
| hsa-miR-8485 NM_0013643 MEF2C | 0.95384615 |
| hsa-miR-4664 NM_0013643 MEF2C | 0.95384615 |
| hsa-miR-5696 NM_0013643 MEF2C | 0.95384615 |
| hsa-miR-6821 NM_0013643 MEF2C | 0.95384615 |









|                                |            |
|--------------------------------|------------|
| hsa-miR-3188 NM_0011310 MEF2C  | 0.96153846 |
| hsa-miR-4446 NM_0011310 MEF2C  | 0.96153846 |
| hsa-miR-4498 NM_0011310 MEF2C  | 0.96153846 |
| hsa-miR-4524 NM_0011310 MEF2C  | 0.96153846 |
| hsa-miR-3960 NM_0011310 MEF2C  | 0.96153846 |
| hsa-miR-4797 NM_0011310 MEF2C  | 0.96153846 |
| hsa-miR-6851 NM_0011310 MEF2C  | 0.96153846 |
| hsa-miR-6889 NM_0011310 MEF2C  | 0.96153846 |
| hsa-miR-490- NM_0011933 MEF2C  | 0.96153846 |
| hsa-miR-512- NM_0011933 MEF2C  | 0.96153846 |
| hsa-miR-1976 NM_0011933 MEF2C  | 0.96153846 |
| hsa-miR-3139 NM_0011933 MEF2C  | 0.96153846 |
| hsa-miR-3188 NM_0011933 MEF2C  | 0.96153846 |
| hsa-miR-4446 NM_0011933 MEF2C  | 0.96153846 |
| hsa-miR-4498 NM_0011933 MEF2C  | 0.96153846 |
| hsa-miR-4524 NM_0011933 MEF2C  | 0.96153846 |
| hsa-miR-3960 NM_0011933 MEF2C  | 0.96153846 |
| hsa-miR-4797 NM_0011933 MEF2C  | 0.96153846 |
| hsa-miR-5579 NM_0011933 MEF2C  | 0.96153846 |
| hsa-miR-6809 NM_0011933 MEF2C  | 0.96153846 |
| hsa-miR-6851 NM_0011933 MEF2C  | 0.96153846 |
| hsa-miR-1039 NM_0011933 MEF2C  | 0.96153846 |
| hsa-miR-1139 NM_0011933 MEF2C  | 0.96153846 |
| hsa-miR-7-5p NM_0011933 MEF2C  | 0.96153846 |
| hsa-miR-193a NM_0011933 MEF2C  | 0.96153846 |
| hsa-miR-512- NM_0011933 MEF2C  | 0.96153846 |
| hsa-miR-1972 NM_0011933 MEF2C  | 0.96153846 |
| hsa-miR-1976 NM_0011933 MEF2C  | 0.96153846 |
| hsa-miR-3139 NM_0011933 MEF2C  | 0.96153846 |
| hsa-miR-3188 NM_0011933 MEF2C  | 0.96153846 |
| hsa-miR-3928 NM_0011933 MEF2C  | 0.96153846 |
| hsa-miR-3960 NM_0011933 MEF2C  | 0.96153846 |
| hsa-miR-4665 NM_0011933 MEF2C  | 0.96153846 |
| hsa-miR-4761 NM_0011933 MEF2C  | 0.96153846 |
| hsa-miR-4797 NM_0011933 MEF2C  | 0.96153846 |
| hsa-miR-5579 NM_0011933 MEF2C  | 0.96153846 |
| hsa-miR-6809 NM_0011933 MEF2C  | 0.96153846 |
| hsa-miR-6851 NM_0011933 MEF2C  | 0.96153846 |
| hsa-miR-6891 NM_0011933 MEF2C  | 0.96153846 |
| hsa-miR-7-5p NM_0011933 MEF2C  | 0.96153846 |
| hsa-miR-181c NM_0011933 MEF2C  | 0.96153846 |
| hsa-miR-135a NM_0011933 MEF2C  | 0.96153846 |
| hsa-miR-372- NM_0011933 MEF2C  | 0.96153846 |
| hsa-miR-512- NM_0011933 MEF2C  | 0.96153846 |
| hsa-miR-1972 NM_0011933 MEF2C  | 0.96153846 |
| hsa-miR-1976 NM_0011933 MEF2C  | 0.96153846 |
| hsa-miR-3139 NM_0011933 MEF2C  | 0.96153846 |
| hsa-miR-3188 NM_0011933 MEF2C  | 0.96153846 |
| hsa-miR-3658 NM_0011933 MEF2C  | 0.96153846 |
| hsa-miR-3928 NM_0011933 MEF2C  | 0.96153846 |
| hsa-miR-4520 NM_0011933 MEF2C  | 0.96153846 |
| hsa-miR-3960 NM_0011933 MEF2C  | 0.96153846 |
| hsa-miR-4769 NM_0011933 MEF2C  | 0.96153846 |
| hsa-miR-4797 NM_0011933 MEF2C  | 0.96153846 |
| hsa-miR-548a NM_0011933 MEF2C  | 0.96153846 |
| hsa-miR-5681 NM_0011933 MEF2C  | 0.96153846 |
| hsa-miR-6809 NM_0011933 MEF2C  | 0.96153846 |
| hsa-miR-6819 NM_0011933 MEF2C  | 0.96153846 |
| hsa-miR-6878 NM_0011933 MEF2C  | 0.96153846 |
| hsa-miR-6889 NM_0011933 MEF2C  | 0.96153846 |
| hsa-miR-6891 NM_0011933 MEF2C  | 0.96153846 |
| hsa-miR-7154 NM_0011933 MEF2C  | 0.96153846 |
| hsa-miR-3059 NM_0011933 MEF2C  | 0.96153846 |
| hsa-miR-6529 NM_0011933 MEF2C  | 0.96153846 |
| hsa-miR-4312 NM_002397 MEF2C   | 0.96703297 |
| hsa-miR-6735 NM_0013080 MEF2C  | 0.96923077 |
| hsa-miR-7107 NM_0013080 MEF2C  | 0.96923077 |
| hsa-miR-6735 NM_002397 MEF2C   | 0.96923077 |
| hsa-miR-7107 NM_002397 MEF2C   | 0.96923077 |
| hsa-miR-6735 NM_0013643 MEF2C  | 0.96923077 |
| hsa-miR-7107 NM_0013643 MEF2C  | 0.96923077 |
| hsa-miR-941 NM_0013643 MEF2C   | 0.96923077 |
| hsa-miR-941 NM_0013643 MEF2C   | 0.96923077 |
| hsa-miR-941 NM_0013643 MEF2C   | 0.96923077 |
| hsa-miR-941 NM_0013643 MEF2C   | 0.96923077 |
| hsa-miR-941 NM_0013643 MEF2C   | 0.96923077 |
| hsa-miR-941 NM_0013643 MEF2C   | 0.96923077 |
| hsa-miR-6735 NM_0011933 MEF2C  | 0.96923077 |
| hsa-miR-7107 NM_0011933 MEF2C  | 0.96923077 |
| hsa-miR-1468 NM_0013080 MEF2C  | 0.97435897 |
| hsa-miR-4682 NM_0013080 MEF2C  | 0.97435897 |
| hsa-miR-92a-: XM_0244460 MEF2C | 0.97435897 |
| hsa-miR-3926 XM_0244460 MEF2C  | 0.97435897 |
| hsa-miR-4787 XM_0244460 MEF2C  | 0.97435897 |
| hsa-miR-664t XM_0244460 MEF2C  | 0.97435897 |
| hsa-miR-92a-: XM_0244460 MEF2C | 0.97435897 |
| hsa-miR-4787 XM_0244460 MEF2C  | 0.97435897 |
| hsa-miR-664t XM_0244460 MEF2C  | 0.97435897 |
| hsa-miR-1468 NM_002397 MEF2C   | 0.97435897 |
| hsa-miR-4682 NM_002397 MEF2C   | 0.97435897 |
| hsa-miR-1468 NM_0013643 MEF2C  | 0.97435897 |
| hsa-miR-4682 NM_0013643 MEF2C  | 0.97435897 |
| hsa-miR-6810 NM_0013643 MEF2C  | 0.97435897 |
| hsa-miR-6759 NM_0013643 MEF2C  | 0.97435897 |
| hsa-miR-6759 NM_0013643 MEF2C  | 0.97435897 |

|                                  |            |
|----------------------------------|------------|
| hsa-miR-4286 NM_0013643 MEF2C    | 0.97435897 |
| hsa-miR-6755 NM_0013643 MEF2C    | 0.97435897 |
| hsa-miR-1468 NM_0013643 MEF2C    | 0.97435897 |
| hsa-miR-3663 NM_0013643 MEF2C    | 0.97435897 |
| hsa-miR-3663 NM_0011310 MEF2C    | 0.97435897 |
| hsa-miR-1468 NM_0011933 MEF2C    | 0.97435897 |
| hsa-miR-1468 NM_0011933 MEF2C    | 0.97435897 |
| hsa-miR-4682 NM_0011933 MEF2C    | 0.97435897 |
| hsa-miR-681C NM_0011933 MEF2C    | 0.97435897 |
| hsa-miR-4524 NM_0013080 MEF2C    | 0.97435897 |
| hsa-miR-6855 NM_0013643 MEF2C    | 0.97435897 |
| hsa-miR-362C NM_0013643 MEF2C    | 0.97435897 |
| hsa-miR-4524 NM_0011310 MEF2C    | 0.97435897 |
| hsa-miR-6813 NM_0011310 MEF2C    | 0.97435897 |
| hsa-miR-4524 NM_0011933 MEF2C    | 0.97435897 |
| hsa-miR-6813 NM_0011933 MEF2C    | 0.97435897 |
| hsa-miR-362C NM_0011933 MEF2C    | 0.97435897 |
| hsa-miR-6888 NM_0013643 MEF2C    | 0.97802198 |
| hsa-miR-4632 NM_0013080 MEF2C    | 0.98076923 |
| hsa-miR-4763 NM_0013080 MEF2C    | 0.98076923 |
| hsa-miR-7114 NM_0013080 MEF2C    | 0.98076923 |
| hsa-miR-4525 XM_0244460 MEF2C    | 0.98076923 |
| hsa-miR-4728 XM_0244460 MEF2C    | 0.98076923 |
| hsa-miR-4525 XM_0244460 MEF2C    | 0.98076923 |
| hsa-miR-4728 XM_0244460 MEF2C    | 0.98076923 |
| hsa-miR-654- NM_002397 MEF2C     | 0.98076923 |
| hsa-miR-451C NM_002397 MEF2C     | 0.98076923 |
| hsa-miR-4632 NM_002397 MEF2C     | 0.98076923 |
| hsa-miR-4632 NM_0013643 MEF2C    | 0.98076923 |
| hsa-miR-4763 NM_0013643 MEF2C    | 0.98076923 |
| hsa-miR-7107 NM_0013643 MEF2C    | 0.98076923 |
| hsa-miR-659- NM_0013643 MEF2C    | 0.98076923 |
| hsa-miR-4632 NM_0013643 MEF2C    | 0.98076923 |
| hsa-miR-4763 NM_0013643 MEF2C    | 0.98076923 |
| hsa-miR-7114 NM_0013643 MEF2C    | 0.98076923 |
| hsa-miR-654- NM_0013643 MEF2C    | 0.98076923 |
| hsa-miR-4632 NM_0013643 MEF2C    | 0.98076923 |
| hsa-miR-4709 NM_0013643 MEF2C    | 0.98076923 |
| hsa-miR-4763 NM_0013643 MEF2C    | 0.98076923 |
| hsa-miR-990C NM_0013643 MEF2C    | 0.98076923 |
| hsa-miR-659- NM_0013643 MEF2C    | 0.98076923 |
| hsa-miR-4632 NM_0013643 MEF2C    | 0.98076923 |
| hsa-miR-4763 NM_0013643 MEF2C    | 0.98076923 |
| hsa-miR-195- NM_0013643 MEF2C    | 0.98076923 |
| hsa-miR-4632 NM_0013643 MEF2C    | 0.98076923 |
| hsa-miR-4763 NM_0013643 MEF2C    | 0.98076923 |
| hsa-miR-4632 NM_0013643 MEF2C    | 0.98076923 |
| hsa-miR-4763 NM_0013643 MEF2C    | 0.98076923 |
| hsa-miR-990C NM_0013643 MEF2C    | 0.98076923 |
| hsa-miR-4632 NM_0013643 MEF2C    | 0.98076923 |
| hsa-miR-4763 NM_0013643 MEF2C    | 0.98076923 |
| hsa-miR-195- NM_0013643 MEF2C    | 0.98076923 |
| hsa-miR-4632 NM_0013643 MEF2C    | 0.98076923 |
| hsa-miR-4763 NM_0013643 MEF2C    | 0.98076923 |
| hsa-miR-654- NM_0013643 MEF2C    | 0.98076923 |
| hsa-miR-4632 NM_0013643 MEF2C    | 0.98076923 |
| hsa-miR-4763 NM_0013643 MEF2C    | 0.98076923 |
| hsa-miR-990C NM_0013643 MEF2C    | 0.98076923 |
| hsa-miR-4632 NM_0011310 MEF2C    | 0.98076923 |
| hsa-miR-4763 NM_0011310 MEF2C    | 0.98076923 |
| hsa-miR-4632 NM_0011933 MEF2C    | 0.98076923 |
| hsa-miR-4763 NM_0011933 MEF2C    | 0.98076923 |
| hsa-miR-654- NM_0011933 MEF2C    | 0.98076923 |
| hsa-miR-4632 NM_0011933 MEF2C    | 0.98076923 |
| hsa-miR-4763 NM_0011933 MEF2C    | 0.98076923 |
| hsa-miR-990C NM_0011933 MEF2C    | 0.98076923 |
| hsa-miR-451C NM_0011933 MEF2C    | 0.98076923 |
| hsa-miR-4632 NM_0011933 MEF2C    | 0.98076923 |
| hsa-miR-4763 NM_0011933 MEF2C    | 0.98076923 |
| hsa-miR-3667 XM_0244460 MEF2C    | 0.98717949 |
| hsa-miR-3667 XM_0244460 MEF2C    | 0.98717949 |
| hsa-miR-3667 NM_002397 MEF2C     | 0.98717949 |
| hsa-miR-3667 NM_0013643 MEF2C    | 0.98717949 |
| hsa-miR-3667 NM_0013643 MEF2C    | 0.98717949 |
| hsa-miR-3667 NM_0013643 MEF2C    | 0.98717949 |
| hsa-miR-3667 NM_0013643 MEF2C    | 0.98717949 |
| hsa-miR-3667 NM_0013643 MEF2C    | 0.98717949 |
| hsa-miR-3667 NM_0013643 MEF2C    | 0.98717949 |
| hsa-miR-3667 NM_0011310 MEF2C    | 0.98717949 |
| hsa-miR-3667 NM_0011933 MEF2C    | 0.98717949 |
| hsa-let-7a-2-3 NM_0013080 MEF2C  | 1          |
| hsa-let-7a-2-3 NM_0013080 MEF2C  | 1          |
| hsa-let-7c-3p NM_0013080 MEF2C   | 1          |
| hsa-let-7e-3p NM_0013080 MEF2C   | 1          |
| hsa-let-7e-3p NM_0013080 MEF2C   | 1          |
| hsa-let-7f-1-3j NM_0013080 MEF2C | 1          |
| hsa-miR-15a- NM_0013080 MEF2C    | 1          |
| hsa-miR-17-5j NM_0013080 MEF2C   | 1          |
| hsa-miR-23a- NM_0013080 MEF2C    | 1          |
| hsa-miR-23a- NM_0013080 MEF2C    | 1          |
| hsa-miR-25-5j NM_0013080 MEF2C   | 1          |

|                                |   |
|--------------------------------|---|
| hsa-miR-29a- NM_0013080 MEF2C  | 1 |
| hsa-miR-92a- NM_0013080 MEF2C  | 1 |
| hsa-miR-96-5j NM_0013080 MEF2C | 1 |
| hsa-miR-103a NM_0013080 MEF2C  | 1 |
| hsa-miR-103a NM_0013080 MEF2C  | 1 |
| hsa-miR-105- NM_0013080 MEF2C  | 1 |
| hsa-miR-106a NM_0013080 MEF2C  | 1 |
| hsa-miR-107 NM_0013080 MEF2C   | 1 |
| hsa-miR-197- NM_0013080 MEF2C  | 1 |
| hsa-miR-129- NM_0013080 MEF2C  | 1 |
| hsa-miR-30d- NM_0013080 MEF2C  | 1 |
| hsa-miR-147a NM_0013080 MEF2C  | 1 |
| hsa-miR-147a NM_0013080 MEF2C  | 1 |
| hsa-miR-10b- NM_0013080 MEF2C  | 1 |
| hsa-miR-181c NM_0013080 MEF2C  | 1 |
| hsa-miR-183- NM_0013080 MEF2C  | 1 |
| hsa-miR-204- NM_0013080 MEF2C  | 1 |
| hsa-miR-205- NM_0013080 MEF2C  | 1 |
| hsa-miR-210- NM_0013080 MEF2C  | 1 |
| hsa-miR-210- NM_0013080 MEF2C  | 1 |
| hsa-miR-210- NM_0013080 MEF2C  | 1 |
| hsa-miR-212- NM_0013080 MEF2C  | 1 |
| hsa-miR-214- NM_0013080 MEF2C  | 1 |
| hsa-miR-222- NM_0013080 MEF2C  | 1 |
| hsa-let-7g-3p NM_0013080 MEF2C | 1 |
| hsa-let-7i-3p NM_0013080 MEF2C | 1 |
| hsa-miR-23b- NM_0013080 MEF2C  | 1 |
| hsa-miR-124- NM_0013080 MEF2C  | 1 |
| hsa-miR-125b NM_0013080 MEF2C  | 1 |
| hsa-miR-135a NM_0013080 MEF2C  | 1 |
| hsa-miR-137- NM_0013080 MEF2C  | 1 |
| hsa-miR-137- NM_0013080 MEF2C  | 1 |
| hsa-miR-140- NM_0013080 MEF2C  | 1 |
| hsa-miR-142- NM_0013080 MEF2C  | 1 |
| hsa-miR-145- NM_0013080 MEF2C  | 1 |
| hsa-miR-191- NM_0013080 MEF2C  | 1 |
| hsa-miR-191- NM_0013080 MEF2C  | 1 |
| hsa-miR-125a NM_0013080 MEF2C  | 1 |
| hsa-miR-127- NM_0013080 MEF2C  | 1 |
| hsa-miR-129- NM_0013080 MEF2C  | 1 |
| hsa-miR-154- NM_0013080 MEF2C  | 1 |
| hsa-miR-154- NM_0013080 MEF2C  | 1 |
| hsa-miR-185- NM_0013080 MEF2C  | 1 |
| hsa-miR-186- NM_0013080 MEF2C  | 1 |
| hsa-miR-188- NM_0013080 MEF2C  | 1 |
| hsa-miR-188- NM_0013080 MEF2C  | 1 |
| hsa-miR-206 NM_0013080 MEF2C   | 1 |
| hsa-miR-200c NM_0013080 MEF2C  | 1 |
| hsa-miR-128- NM_0013080 MEF2C  | 1 |
| hsa-miR-296- NM_0013080 MEF2C  | 1 |
| hsa-miR-26a- NM_0013080 MEF2C  | 1 |
| hsa-miR-363- NM_0013080 MEF2C  | 1 |
| hsa-miR-302b NM_0013080 MEF2C  | 1 |
| hsa-miR-302d NM_0013080 MEF2C  | 1 |
| hsa-miR-370- NM_0013080 MEF2C  | 1 |
| hsa-miR-371a NM_0013080 MEF2C  | 1 |
| hsa-miR-372- NM_0013080 MEF2C  | 1 |
| hsa-miR-372- NM_0013080 MEF2C  | 1 |
| hsa-miR-376a NM_0013080 MEF2C  | 1 |
| hsa-miR-330- NM_0013080 MEF2C  | 1 |
| hsa-miR-328- NM_0013080 MEF2C  | 1 |
| hsa-miR-148b NM_0013080 MEF2C  | 1 |
| hsa-miR-331- NM_0013080 MEF2C  | 1 |
| hsa-miR-324- NM_0013080 MEF2C  | 1 |
| hsa-miR-325 NM_0013080 MEF2C   | 1 |
| hsa-miR-18b- NM_0013080 MEF2C  | 1 |
| hsa-miR-20b- NM_0013080 MEF2C  | 1 |
| hsa-miR-329- NM_0013080 MEF2C  | 1 |
| hsa-miR-329- NM_0013080 MEF2C  | 1 |
| hsa-miR-412- NM_0013080 MEF2C  | 1 |
| hsa-miR-483- NM_0013080 MEF2C  | 1 |
| hsa-miR-484 NM_0013080 MEF2C   | 1 |
| hsa-miR-488- NM_0013080 MEF2C  | 1 |
| hsa-miR-490- NM_0013080 MEF2C  | 1 |
| hsa-miR-202- NM_0013080 MEF2C  | 1 |
| hsa-miR-492 NM_0013080 MEF2C   | 1 |
| hsa-miR-494- NM_0013080 MEF2C  | 1 |
| hsa-miR-193b NM_0013080 MEF2C  | 1 |
| hsa-miR-193b NM_0013080 MEF2C  | 1 |
| hsa-miR-520e NM_0013080 MEF2C  | 1 |
| hsa-miR-519e NM_0013080 MEF2C  | 1 |
| hsa-miR-520f NM_0013080 MEF2C  | 1 |
| hsa-miR-520a NM_0013080 MEF2C  | 1 |
| hsa-miR-526a NM_0013080 MEF2C  | 1 |
| hsa-miR-524- NM_0013080 MEF2C  | 1 |
| hsa-miR-519d NM_0013080 MEF2C  | 1 |
| hsa-miR-518a NM_0013080 MEF2C  | 1 |
| hsa-miR-518d NM_0013080 MEF2C  | 1 |
| hsa-miR-518d NM_0013080 MEF2C  | 1 |
| hsa-miR-520h NM_0013080 MEF2C  | 1 |
| hsa-miR-500a NM_0013080 MEF2C  | 1 |
| hsa-miR-501- NM_0013080 MEF2C  | 1 |
| hsa-miR-501- NM_0013080 MEF2C  | 1 |
| hsa-miR-502- NM_0013080 MEF2C  | 1 |

|              |            |       |   |
|--------------|------------|-------|---|
| hsa-miR-504- | NM_0013080 | MEF2C | 1 |
| hsa-miR-514a | NM_0013080 | MEF2C | 1 |
| hsa-miR-532- | NM_0013080 | MEF2C | 1 |
| hsa-miR-455- | NM_0013080 | MEF2C | 1 |
| hsa-miR-487b | NM_0013080 | MEF2C | 1 |
| hsa-miR-487b | NM_0013080 | MEF2C | 1 |
| hsa-miR-487b | NM_0013080 | MEF2C | 1 |
| hsa-miR-487b | NM_0013080 | MEF2C | 1 |
| hsa-miR-552- | NM_0013080 | MEF2C | 1 |
| hsa-miR-551b | NM_0013080 | MEF2C | 1 |
| hsa-miR-574- | NM_0013080 | MEF2C | 1 |
| hsa-miR-584- | NM_0013080 | MEF2C | 1 |
| hsa-miR-585- | NM_0013080 | MEF2C | 1 |
| hsa-miR-550a | NM_0013080 | MEF2C | 1 |
| hsa-miR-592  | NM_0013080 | MEF2C | 1 |
| hsa-miR-603  | NM_0013080 | MEF2C | 1 |
| hsa-miR-615- | NM_0013080 | MEF2C | 1 |
| hsa-miR-615- | NM_0013080 | MEF2C | 1 |
| hsa-miR-616- | NM_0013080 | MEF2C | 1 |
| hsa-miR-618  | NM_0013080 | MEF2C | 1 |
| hsa-miR-619- | NM_0013080 | MEF2C | 1 |
| hsa-miR-33b- | NM_0013080 | MEF2C | 1 |
| hsa-miR-642a | NM_0013080 | MEF2C | 1 |
| hsa-miR-642a | NM_0013080 | MEF2C | 1 |
| hsa-miR-644a | NM_0013080 | MEF2C | 1 |
| hsa-miR-646  | NM_0013080 | MEF2C | 1 |
| hsa-miR-648  | NM_0013080 | MEF2C | 1 |
| hsa-miR-649  | NM_0013080 | MEF2C | 1 |
| hsa-miR-650  | NM_0013080 | MEF2C | 1 |
| hsa-miR-654- | NM_0013080 | MEF2C | 1 |
| hsa-miR-549a | NM_0013080 | MEF2C | 1 |
| hsa-miR-659- | NM_0013080 | MEF2C | 1 |
| hsa-miR-758- | NM_0013080 | MEF2C | 1 |
| hsa-miR-668- | NM_0013080 | MEF2C | 1 |
| hsa-miR-767- | NM_0013080 | MEF2C | 1 |
| hsa-miR-1224 | NM_0013080 | MEF2C | 1 |
| hsa-miR-320b | NM_0013080 | MEF2C | 1 |
| hsa-miR-320c | NM_0013080 | MEF2C | 1 |
| hsa-miR-1271 | NM_0013080 | MEF2C | 1 |
| hsa-miR-449c | NM_0013080 | MEF2C | 1 |
| hsa-miR-449c | NM_0013080 | MEF2C | 1 |
| hsa-miR-449c | NM_0013080 | MEF2C | 1 |
| hsa-miR-769- | NM_0013080 | MEF2C | 1 |
| hsa-miR-670- | NM_0013080 | MEF2C | 1 |
| hsa-miR-2113 | NM_0013080 | MEF2C | 1 |
| hsa-miR-764  | NM_0013080 | MEF2C | 1 |
| hsa-miR-765  | NM_0013080 | MEF2C | 1 |
| hsa-miR-891a | NM_0013080 | MEF2C | 1 |
| hsa-miR-891a | NM_0013080 | MEF2C | 1 |
| hsa-miR-874- | NM_0013080 | MEF2C | 1 |
| hsa-miR-888- | NM_0013080 | MEF2C | 1 |
| hsa-miR-892b | NM_0013080 | MEF2C | 1 |
| hsa-miR-892b | NM_0013080 | MEF2C | 1 |
| hsa-miR-887- | NM_0013080 | MEF2C | 1 |
| hsa-miR-873- | NM_0013080 | MEF2C | 1 |
| hsa-miR-760  | NM_0013080 | MEF2C | 1 |
| hsa-miR-760  | NM_0013080 | MEF2C | 1 |
| hsa-miR-509- | NM_0013080 | MEF2C | 1 |
| hsa-miR-933  | NM_0013080 | MEF2C | 1 |
| hsa-miR-935  | NM_0013080 | MEF2C | 1 |
| hsa-miR-936  | NM_0013080 | MEF2C | 1 |
| hsa-miR-939- | NM_0013080 | MEF2C | 1 |
| hsa-miR-939- | NM_0013080 | MEF2C | 1 |
| hsa-miR-940  | NM_0013080 | MEF2C | 1 |
| hsa-miR-1178 | NM_0013080 | MEF2C | 1 |
| hsa-miR-1180 | NM_0013080 | MEF2C | 1 |
| hsa-miR-1225 | NM_0013080 | MEF2C | 1 |
| hsa-miR-1227 | NM_0013080 | MEF2C | 1 |
| hsa-miR-1227 | NM_0013080 | MEF2C | 1 |
| hsa-miR-1228 | NM_0013080 | MEF2C | 1 |
| hsa-miR-1229 | NM_0013080 | MEF2C | 1 |
| hsa-miR-1229 | NM_0013080 | MEF2C | 1 |
| hsa-miR-1233 | NM_0013080 | MEF2C | 1 |
| hsa-miR-1233 | NM_0013080 | MEF2C | 1 |
| hsa-miR-1236 | NM_0013080 | MEF2C | 1 |
| hsa-miR-1237 | NM_0013080 | MEF2C | 1 |
| hsa-miR-1237 | NM_0013080 | MEF2C | 1 |
| hsa-miR-1204 | NM_0013080 | MEF2C | 1 |
| hsa-miR-1286 | NM_0013080 | MEF2C | 1 |
| hsa-miR-1287 | NM_0013080 | MEF2C | 1 |
| hsa-miR-1287 | NM_0013080 | MEF2C | 1 |
| hsa-miR-1303 | NM_0013080 | MEF2C | 1 |
| hsa-miR-1244 | NM_0013080 | MEF2C | 1 |
| hsa-miR-1247 | NM_0013080 | MEF2C | 1 |
| hsa-miR-1248 | NM_0013080 | MEF2C | 1 |
| hsa-miR-1249 | NM_0013080 | MEF2C | 1 |
| hsa-miR-1249 | NM_0013080 | MEF2C | 1 |
| hsa-miR-1251 | NM_0013080 | MEF2C | 1 |
| hsa-miR-1251 | NM_0013080 | MEF2C | 1 |
| hsa-miR-1253 | NM_0013080 | MEF2C | 1 |
| hsa-miR-1263 | NM_0013080 | MEF2C | 1 |
| hsa-miR-1265 | NM_0013080 | MEF2C | 1 |
| hsa-miR-1266 | NM_0013080 | MEF2C | 1 |
| hsa-miR-1272 | NM_0013080 | MEF2C | 1 |













|                               |   |
|-------------------------------|---|
| hsa-miR-1287 XM_0244460 MEF2C | 1 |
| hsa-miR-1303 XM_0244460 MEF2C | 1 |
| hsa-miR-1251 XM_0244460 MEF2C | 1 |
| hsa-miR-1251 XM_0244460 MEF2C | 1 |
| hsa-miR-1263 XM_0244460 MEF2C | 1 |
| hsa-miR-1281 XM_0244460 MEF2C | 1 |
| hsa-miR-1292 XM_0244460 MEF2C | 1 |
| hsa-miR-1292 XM_0244460 MEF2C | 1 |
| hsa-miR-1469 XM_0244460 MEF2C | 1 |
| hsa-miR-147C XM_0244460 MEF2C | 1 |
| hsa-miR-1539 XM_0244460 MEF2C | 1 |
| hsa-miR-1909 XM_0244460 MEF2C | 1 |
| hsa-miR-1911 XM_0244460 MEF2C | 1 |
| hsa-miR-1912 XM_0244460 MEF2C | 1 |
| hsa-miR-1913 XM_0244460 MEF2C | 1 |
| hsa-miR-1973 XM_0244460 MEF2C | 1 |
| hsa-miR-2277 XM_0244460 MEF2C | 1 |
| hsa-miR-3121 XM_0244460 MEF2C | 1 |
| hsa-miR-3126 XM_0244460 MEF2C | 1 |
| hsa-miR-466 XM_0244460 MEF2C  | 1 |
| hsa-miR-3139 XM_0244460 MEF2C | 1 |
| hsa-miR-3149 XM_0244460 MEF2C | 1 |
| hsa-miR-3158 XM_0244460 MEF2C | 1 |
| hsa-miR-3158 XM_0244460 MEF2C | 1 |
| hsa-miR-3162 XM_0244460 MEF2C | 1 |
| hsa-miR-3162 XM_0244460 MEF2C | 1 |
| hsa-miR-3165 XM_0244460 MEF2C | 1 |
| hsa-miR-317C XM_0244460 MEF2C | 1 |
| hsa-miR-3173 XM_0244460 MEF2C | 1 |
| hsa-miR-3174 XM_0244460 MEF2C | 1 |
| hsa-miR-3175 XM_0244460 MEF2C | 1 |
| hsa-miR-3176 XM_0244460 MEF2C | 1 |
| hsa-miR-3184 XM_0244460 MEF2C | 1 |
| hsa-miR-3186 XM_0244460 MEF2C | 1 |
| hsa-miR-3192 XM_0244460 MEF2C | 1 |
| hsa-miR-3194 XM_0244460 MEF2C | 1 |
| hsa-miR-4312 XM_0244460 MEF2C | 1 |
| hsa-miR-4313 XM_0244460 MEF2C | 1 |
| hsa-miR-4259 XM_0244460 MEF2C | 1 |
| hsa-miR-426C XM_0244460 MEF2C | 1 |
| hsa-miR-4279 XM_0244460 MEF2C | 1 |
| hsa-miR-4283 XM_0244460 MEF2C | 1 |
| hsa-miR-4289 XM_0244460 MEF2C | 1 |
| hsa-miR-429C XM_0244460 MEF2C | 1 |
| hsa-miR-362C XM_0244460 MEF2C | 1 |
| hsa-miR-3622 XM_0244460 MEF2C | 1 |
| hsa-miR-3622 XM_0244460 MEF2C | 1 |
| hsa-miR-3649 XM_0244460 MEF2C | 1 |
| hsa-miR-3677 XM_0244460 MEF2C | 1 |
| hsa-miR-3907 XM_0244460 MEF2C | 1 |
| hsa-miR-3907 XM_0244460 MEF2C | 1 |
| hsa-miR-3909 XM_0244460 MEF2C | 1 |
| hsa-miR-315C XM_0244460 MEF2C | 1 |
| hsa-miR-394C XM_0244460 MEF2C | 1 |
| hsa-miR-3943 XM_0244460 MEF2C | 1 |
| hsa-miR-3945 XM_0244460 MEF2C | 1 |
| hsa-miR-3945 XM_0244460 MEF2C | 1 |
| hsa-miR-4442 XM_0244460 MEF2C | 1 |
| hsa-miR-4446 XM_0244460 MEF2C | 1 |
| hsa-miR-4449 XM_0244460 MEF2C | 1 |
| hsa-miR-548a XM_0244460 MEF2C | 1 |
| hsa-miR-4456 XM_0244460 MEF2C | 1 |
| hsa-miR-4456 XM_0244460 MEF2C | 1 |
| hsa-miR-4463 XM_0244460 MEF2C | 1 |
| hsa-miR-4489 XM_0244460 MEF2C | 1 |
| hsa-miR-4498 XM_0244460 MEF2C | 1 |
| hsa-miR-4506 XM_0244460 MEF2C | 1 |
| hsa-miR-2392 XM_0244460 MEF2C | 1 |
| hsa-miR-451C XM_0244460 MEF2C | 1 |
| hsa-miR-4524 XM_0244460 MEF2C | 1 |
| hsa-miR-453C XM_0244460 MEF2C | 1 |
| hsa-miR-4533 XM_0244460 MEF2C | 1 |
| hsa-miR-4534 XM_0244460 MEF2C | 1 |
| hsa-miR-4632 XM_0244460 MEF2C | 1 |
| hsa-miR-4646 XM_0244460 MEF2C | 1 |
| hsa-miR-4649 XM_0244460 MEF2C | 1 |
| hsa-miR-4655 XM_0244460 MEF2C | 1 |
| hsa-miR-4664 XM_0244460 MEF2C | 1 |
| hsa-miR-4667 XM_0244460 MEF2C | 1 |
| hsa-miR-4682 XM_0244460 MEF2C | 1 |
| hsa-miR-4685 XM_0244460 MEF2C | 1 |
| hsa-miR-4687 XM_0244460 MEF2C | 1 |
| hsa-miR-4696 XM_0244460 MEF2C | 1 |
| hsa-miR-470C XM_0244460 MEF2C | 1 |
| hsa-miR-4701 XM_0244460 MEF2C | 1 |
| hsa-miR-4701 XM_0244460 MEF2C | 1 |
| hsa-miR-4706 XM_0244460 MEF2C | 1 |
| hsa-miR-4707 XM_0244460 MEF2C | 1 |
| hsa-miR-4707 XM_0244460 MEF2C | 1 |
| hsa-miR-4716 XM_0244460 MEF2C | 1 |
| hsa-miR-4716 XM_0244460 MEF2C | 1 |
| hsa-miR-4717 XM_0244460 MEF2C | 1 |
| hsa-miR-4717 XM_0244460 MEF2C | 1 |
| hsa-miR-472C XM_0244460 MEF2C | 1 |



|                                |   |
|--------------------------------|---|
| hsa-miR-6827 XM_0244460 MEF2C  | 1 |
| hsa-miR-6827 XM_0244460 MEF2C  | 1 |
| hsa-miR-6830 XM_0244460 MEF2C  | 1 |
| hsa-miR-6836 XM_0244460 MEF2C  | 1 |
| hsa-miR-6845 XM_0244460 MEF2C  | 1 |
| hsa-miR-6846 XM_0244460 MEF2C  | 1 |
| hsa-miR-6851 XM_0244460 MEF2C  | 1 |
| hsa-miR-6852 XM_0244460 MEF2C  | 1 |
| hsa-miR-6855 XM_0244460 MEF2C  | 1 |
| hsa-miR-6861 XM_0244460 MEF2C  | 1 |
| hsa-miR-6864 XM_0244460 MEF2C  | 1 |
| hsa-miR-6864 XM_0244460 MEF2C  | 1 |
| hsa-miR-6865 XM_0244460 MEF2C  | 1 |
| hsa-miR-6865 XM_0244460 MEF2C  | 1 |
| hsa-miR-6866 XM_0244460 MEF2C  | 1 |
| hsa-miR-6876 XM_0244460 MEF2C  | 1 |
| hsa-miR-6882 XM_0244460 MEF2C  | 1 |
| hsa-miR-6885 XM_0244460 MEF2C  | 1 |
| hsa-miR-6886 XM_0244460 MEF2C  | 1 |
| hsa-miR-6888 XM_0244460 MEF2C  | 1 |
| hsa-miR-6891 XM_0244460 MEF2C  | 1 |
| hsa-miR-6892 XM_0244460 MEF2C  | 1 |
| hsa-miR-7111 XM_0244460 MEF2C  | 1 |
| hsa-miR-7112 XM_0244460 MEF2C  | 1 |
| hsa-miR-7114 XM_0244460 MEF2C  | 1 |
| hsa-miR-7114 XM_0244460 MEF2C  | 1 |
| hsa-miR-7154 XM_0244460 MEF2C  | 1 |
| hsa-miR-7160 XM_0244460 MEF2C  | 1 |
| hsa-miR-7703 XM_0244460 MEF2C  | 1 |
| hsa-miR-7704 XM_0244460 MEF2C  | 1 |
| hsa-miR-4433 XM_0244460 MEF2C  | 1 |
| hsa-miR-1273 XM_0244460 MEF2C  | 1 |
| hsa-miR-7849 XM_0244460 MEF2C  | 1 |
| hsa-miR-7978 XM_0244460 MEF2C  | 1 |
| hsa-miR-8077 XM_0244460 MEF2C  | 1 |
| hsa-miR-8485 XM_0244460 MEF2C  | 1 |
| hsa-miR-1039 XM_0244460 MEF2C  | 1 |
| hsa-miR-1039 XM_0244460 MEF2C  | 1 |
| hsa-miR-1039 XM_0244460 MEF2C  | 1 |
| hsa-miR-1040 XM_0244460 MEF2C  | 1 |
| hsa-miR-1139 XM_0244460 MEF2C  | 1 |
| hsa-miR-3085 XM_0244460 MEF2C  | 1 |
| hsa-miR-3085 XM_0244460 MEF2C  | 1 |
| hsa-miR-3085 XM_0244460 MEF2C  | 1 |
| hsa-miR-6529 XM_0244460 MEF2C  | 1 |
| hsa-miR-1211 XM_0244460 MEF2C  | 1 |
| hsa-miR-1211 XM_0244460 MEF2C  | 1 |
| hsa-miR-1212 XM_0244460 MEF2C  | 1 |
| hsa-miR-1212 XM_0244460 MEF2C  | 1 |
| hsa-miR-1213 XM_0244460 MEF2C  | 1 |
| hsa-miR-15a- XM_0244460 MEF2C  | 1 |
| hsa-miR-22-5j XM_0244460 MEF2C | 1 |
| hsa-miR-27a- XM_0244460 MEF2C  | 1 |
| hsa-miR-106a XM_0244460 MEF2C  | 1 |
| hsa-miR-197- XM_0244460 MEF2C  | 1 |
| hsa-miR-197- XM_0244460 MEF2C  | 1 |
| hsa-miR-30d- XM_0244460 MEF2C  | 1 |
| hsa-miR-183- XM_0244460 MEF2C  | 1 |
| hsa-miR-210- XM_0244460 MEF2C  | 1 |
| hsa-miR-211- XM_0244460 MEF2C  | 1 |
| hsa-miR-221- XM_0244460 MEF2C  | 1 |
| hsa-let-7g-3p XM_0244460 MEF2C | 1 |
| hsa-let-7i-3p XM_0244460 MEF2C | 1 |
| hsa-miR-125b XM_0244460 MEF2C  | 1 |
| hsa-miR-137- XM_0244460 MEF2C  | 1 |
| hsa-miR-127- XM_0244460 MEF2C  | 1 |
| hsa-miR-134- XM_0244460 MEF2C  | 1 |
| hsa-miR-154- XM_0244460 MEF2C  | 1 |
| hsa-miR-186- XM_0244460 MEF2C  | 1 |
| hsa-miR-320a XM_0244460 MEF2C  | 1 |
| hsa-miR-200c XM_0244460 MEF2C  | 1 |
| hsa-miR-128- XM_0244460 MEF2C  | 1 |
| hsa-miR-296- XM_0244460 MEF2C  | 1 |
| hsa-miR-296- XM_0244460 MEF2C  | 1 |
| hsa-miR-130b XM_0244460 MEF2C  | 1 |
| hsa-miR-365a XM_0244460 MEF2C  | 1 |
| hsa-miR-328- XM_0244460 MEF2C  | 1 |
| hsa-miR-326 XM_0244460 MEF2C   | 1 |
| hsa-miR-326 XM_0244460 MEF2C   | 1 |
| hsa-miR-148b XM_0244460 MEF2C  | 1 |
| hsa-miR-18b- XM_0244460 MEF2C  | 1 |
| hsa-miR-448 XM_0244460 MEF2C   | 1 |
| hsa-miR-329- XM_0244460 MEF2C  | 1 |
| hsa-miR-329- XM_0244460 MEF2C  | 1 |
| hsa-miR-483- XM_0244460 MEF2C  | 1 |
| hsa-miR-493- XM_0244460 MEF2C  | 1 |
| hsa-miR-193b XM_0244460 MEF2C  | 1 |
| hsa-miR-519e XM_0244460 MEF2C  | 1 |
| hsa-miR-520f XM_0244460 MEF2C  | 1 |
| hsa-miR-520a XM_0244460 MEF2C  | 1 |
| hsa-miR-523- XM_0244460 MEF2C  | 1 |
| hsa-miR-505- XM_0244460 MEF2C  | 1 |
| hsa-miR-487b XM_0244460 MEF2C  | 1 |
| hsa-miR-552- XM_0244460 MEF2C  | 1 |

|                        |            |       |   |
|------------------------|------------|-------|---|
| hsa-miR-585-XM_0244460 | MEF2C      | 1     |   |
| hsa-miR-603            | XM_0244460 | MEF2C | 1 |
| hsa-miR-615-XM_0244460 | MEF2C      | 1     |   |
| hsa-miR-619-XM_0244460 | MEF2C      | 1     |   |
| hsa-miR-33b-XM_0244460 | MEF2C      | 1     |   |
| hsa-miR-646            | XM_0244460 | MEF2C | 1 |
| hsa-miR-767-XM_0244460 | MEF2C      | 1     |   |
| hsa-miR-1224           | XM_0244460 | MEF2C | 1 |
| hsa-miR-1296           | XM_0244460 | MEF2C | 1 |
| hsa-miR-1271           | XM_0244460 | MEF2C | 1 |
| hsa-miR-1271           | XM_0244460 | MEF2C | 1 |
| hsa-miR-769-XM_0244460 | MEF2C      | 1     |   |
| hsa-miR-2113           | XM_0244460 | MEF2C | 1 |
| hsa-miR-675-XM_0244460 | MEF2C      | 1     |   |
| hsa-miR-675-XM_0244460 | MEF2C      | 1     |   |
| hsa-miR-891a           | XM_0244460 | MEF2C | 1 |
| hsa-miR-875-XM_0244460 | MEF2C      | 1     |   |
| hsa-miR-760            | XM_0244460 | MEF2C | 1 |
| hsa-miR-921            | XM_0244460 | MEF2C | 1 |
| hsa-miR-933            | XM_0244460 | MEF2C | 1 |
| hsa-miR-937-XM_0244460 | MEF2C      | 1     |   |
| hsa-miR-940            | XM_0244460 | MEF2C | 1 |
| hsa-miR-118C           | XM_0244460 | MEF2C | 1 |
| hsa-miR-1228           | XM_0244460 | MEF2C | 1 |
| hsa-miR-1233           | XM_0244460 | MEF2C | 1 |
| hsa-miR-1233           | XM_0244460 | MEF2C | 1 |
| hsa-miR-1234           | XM_0244460 | MEF2C | 1 |
| hsa-miR-1236           | XM_0244460 | MEF2C | 1 |
| hsa-miR-1238           | XM_0244460 | MEF2C | 1 |
| hsa-miR-1204           | XM_0244460 | MEF2C | 1 |
| hsa-miR-1207           | XM_0244460 | MEF2C | 1 |
| hsa-miR-1287           | XM_0244460 | MEF2C | 1 |
| hsa-miR-1303           | XM_0244460 | MEF2C | 1 |
| hsa-miR-1251           | XM_0244460 | MEF2C | 1 |
| hsa-miR-1251           | XM_0244460 | MEF2C | 1 |
| hsa-miR-1263           | XM_0244460 | MEF2C | 1 |
| hsa-miR-1281           | XM_0244460 | MEF2C | 1 |
| hsa-miR-1292           | XM_0244460 | MEF2C | 1 |
| hsa-miR-1292           | XM_0244460 | MEF2C | 1 |
| hsa-miR-146S           | XM_0244460 | MEF2C | 1 |
| hsa-miR-147C           | XM_0244460 | MEF2C | 1 |
| hsa-miR-153S           | XM_0244460 | MEF2C | 1 |
| hsa-miR-190S           | XM_0244460 | MEF2C | 1 |
| hsa-miR-1911           | XM_0244460 | MEF2C | 1 |
| hsa-miR-1912           | XM_0244460 | MEF2C | 1 |
| hsa-miR-1913           | XM_0244460 | MEF2C | 1 |
| hsa-miR-1973           | XM_0244460 | MEF2C | 1 |
| hsa-miR-2277           | XM_0244460 | MEF2C | 1 |
| hsa-miR-3121           | XM_0244460 | MEF2C | 1 |
| hsa-miR-3126           | XM_0244460 | MEF2C | 1 |
| hsa-miR-466            | XM_0244460 | MEF2C | 1 |
| hsa-miR-313S           | XM_0244460 | MEF2C | 1 |
| hsa-miR-314S           | XM_0244460 | MEF2C | 1 |
| hsa-miR-3158           | XM_0244460 | MEF2C | 1 |
| hsa-miR-3158           | XM_0244460 | MEF2C | 1 |
| hsa-miR-3162           | XM_0244460 | MEF2C | 1 |
| hsa-miR-3162           | XM_0244460 | MEF2C | 1 |
| hsa-miR-3165           | XM_0244460 | MEF2C | 1 |
| hsa-miR-317C           | XM_0244460 | MEF2C | 1 |
| hsa-miR-3173           | XM_0244460 | MEF2C | 1 |
| hsa-miR-3174           | XM_0244460 | MEF2C | 1 |
| hsa-miR-3175           | XM_0244460 | MEF2C | 1 |
| hsa-miR-3176           | XM_0244460 | MEF2C | 1 |
| hsa-miR-3184           | XM_0244460 | MEF2C | 1 |
| hsa-miR-3186           | XM_0244460 | MEF2C | 1 |
| hsa-miR-3192           | XM_0244460 | MEF2C | 1 |
| hsa-miR-3194           | XM_0244460 | MEF2C | 1 |
| hsa-miR-4312           | XM_0244460 | MEF2C | 1 |
| hsa-miR-4313           | XM_0244460 | MEF2C | 1 |
| hsa-miR-425S           | XM_0244460 | MEF2C | 1 |
| hsa-miR-427S           | XM_0244460 | MEF2C | 1 |
| hsa-miR-4283           | XM_0244460 | MEF2C | 1 |
| hsa-miR-428S           | XM_0244460 | MEF2C | 1 |
| hsa-miR-429C           | XM_0244460 | MEF2C | 1 |
| hsa-miR-362C           | XM_0244460 | MEF2C | 1 |
| hsa-miR-3622           | XM_0244460 | MEF2C | 1 |
| hsa-miR-3622           | XM_0244460 | MEF2C | 1 |
| hsa-miR-364S           | XM_0244460 | MEF2C | 1 |
| hsa-miR-3677           | XM_0244460 | MEF2C | 1 |
| hsa-miR-3907           | XM_0244460 | MEF2C | 1 |
| hsa-miR-3907           | XM_0244460 | MEF2C | 1 |
| hsa-miR-315C           | XM_0244460 | MEF2C | 1 |
| hsa-miR-394C           | XM_0244460 | MEF2C | 1 |
| hsa-miR-3943           | XM_0244460 | MEF2C | 1 |
| hsa-miR-3945           | XM_0244460 | MEF2C | 1 |
| hsa-miR-4442           | XM_0244460 | MEF2C | 1 |
| hsa-miR-4446           | XM_0244460 | MEF2C | 1 |
| hsa-miR-444S           | XM_0244460 | MEF2C | 1 |
| hsa-miR-548a           | XM_0244460 | MEF2C | 1 |
| hsa-miR-4456           | XM_0244460 | MEF2C | 1 |
| hsa-miR-4456           | XM_0244460 | MEF2C | 1 |
| hsa-miR-4463           | XM_0244460 | MEF2C | 1 |
| hsa-miR-448S           | XM_0244460 | MEF2C | 1 |
| hsa-miR-4498           | XM_0244460 | MEF2C | 1 |



|                           |       |   |
|---------------------------|-------|---|
| hsa-miR-676S XM_0244460   | MEF2C | 1 |
| hsa-miR-677C XM_0244460   | MEF2C | 1 |
| hsa-miR-6773 XM_0244460   | MEF2C | 1 |
| hsa-miR-6777 XM_0244460   | MEF2C | 1 |
| hsa-miR-6782 XM_0244460   | MEF2C | 1 |
| hsa-miR-6783 XM_0244460   | MEF2C | 1 |
| hsa-miR-6786 XM_0244460   | MEF2C | 1 |
| hsa-miR-6786 XM_0244460   | MEF2C | 1 |
| hsa-miR-6787 XM_0244460   | MEF2C | 1 |
| hsa-miR-6787 XM_0244460   | MEF2C | 1 |
| hsa-miR-6792 XM_0244460   | MEF2C | 1 |
| hsa-miR-6794 XM_0244460   | MEF2C | 1 |
| hsa-miR-6795 XM_0244460   | MEF2C | 1 |
| hsa-miR-6796 XM_0244460   | MEF2C | 1 |
| hsa-miR-6796 XM_0244460   | MEF2C | 1 |
| hsa-miR-6797 XM_0244460   | MEF2C | 1 |
| hsa-miR-6798 XM_0244460   | MEF2C | 1 |
| hsa-miR-6798 XM_0244460   | MEF2C | 1 |
| hsa-miR-6801 XM_0244460   | MEF2C | 1 |
| hsa-miR-6802 XM_0244460   | MEF2C | 1 |
| hsa-miR-6802 XM_0244460   | MEF2C | 1 |
| hsa-miR-6804 XM_0244460   | MEF2C | 1 |
| hsa-miR-6804 XM_0244460   | MEF2C | 1 |
| hsa-miR-681C XM_0244460   | MEF2C | 1 |
| hsa-miR-6812 XM_0244460   | MEF2C | 1 |
| hsa-miR-6813 XM_0244460   | MEF2C | 1 |
| hsa-miR-6813 XM_0244460   | MEF2C | 1 |
| hsa-miR-6816 XM_0244460   | MEF2C | 1 |
| hsa-miR-6817 XM_0244460   | MEF2C | 1 |
| hsa-miR-6821 XM_0244460   | MEF2C | 1 |
| hsa-miR-6823 XM_0244460   | MEF2C | 1 |
| hsa-miR-6823 XM_0244460   | MEF2C | 1 |
| hsa-miR-6827 XM_0244460   | MEF2C | 1 |
| hsa-miR-6827 XM_0244460   | MEF2C | 1 |
| hsa-miR-683C XM_0244460   | MEF2C | 1 |
| hsa-miR-6836 XM_0244460   | MEF2C | 1 |
| hsa-miR-6845 XM_0244460   | MEF2C | 1 |
| hsa-miR-6846 XM_0244460   | MEF2C | 1 |
| hsa-miR-6846 XM_0244460   | MEF2C | 1 |
| hsa-miR-6851 XM_0244460   | MEF2C | 1 |
| hsa-miR-6852 XM_0244460   | MEF2C | 1 |
| hsa-miR-6855 XM_0244460   | MEF2C | 1 |
| hsa-miR-6861 XM_0244460   | MEF2C | 1 |
| hsa-miR-6864 XM_0244460   | MEF2C | 1 |
| hsa-miR-6864 XM_0244460   | MEF2C | 1 |
| hsa-miR-6865 XM_0244460   | MEF2C | 1 |
| hsa-miR-6865 XM_0244460   | MEF2C | 1 |
| hsa-miR-6866 XM_0244460   | MEF2C | 1 |
| hsa-miR-6876 XM_0244460   | MEF2C | 1 |
| hsa-miR-6882 XM_0244460   | MEF2C | 1 |
| hsa-miR-6885 XM_0244460   | MEF2C | 1 |
| hsa-miR-6886 XM_0244460   | MEF2C | 1 |
| hsa-miR-6888 XM_0244460   | MEF2C | 1 |
| hsa-miR-6891 XM_0244460   | MEF2C | 1 |
| hsa-miR-6892 XM_0244460   | MEF2C | 1 |
| hsa-miR-7111 XM_0244460   | MEF2C | 1 |
| hsa-miR-7112 XM_0244460   | MEF2C | 1 |
| hsa-miR-7114 XM_0244460   | MEF2C | 1 |
| hsa-miR-7114 XM_0244460   | MEF2C | 1 |
| hsa-miR-7154 XM_0244460   | MEF2C | 1 |
| hsa-miR-7155 XM_0244460   | MEF2C | 1 |
| hsa-miR-716C XM_0244460   | MEF2C | 1 |
| hsa-miR-716C XM_0244460   | MEF2C | 1 |
| hsa-miR-7703 XM_0244460   | MEF2C | 1 |
| hsa-miR-7704 XM_0244460   | MEF2C | 1 |
| hsa-miR-4433 XM_0244460   | MEF2C | 1 |
| hsa-miR-1273 XM_0244460   | MEF2C | 1 |
| hsa-miR-784S XM_0244460   | MEF2C | 1 |
| hsa-miR-7978 XM_0244460   | MEF2C | 1 |
| hsa-miR-8077 XM_0244460   | MEF2C | 1 |
| hsa-miR-8088 XM_0244460   | MEF2C | 1 |
| hsa-miR-8485 XM_0244460   | MEF2C | 1 |
| hsa-miR-103S XM_0244460   | MEF2C | 1 |
| hsa-miR-103S XM_0244460   | MEF2C | 1 |
| hsa-miR-103S XM_0244460   | MEF2C | 1 |
| hsa-miR-104C XM_0244460   | MEF2C | 1 |
| hsa-miR-113S XM_0244460   | MEF2C | 1 |
| hsa-miR-114C XM_0244460   | MEF2C | 1 |
| hsa-miR-3085 XM_0244460   | MEF2C | 1 |
| hsa-miR-3085 XM_0244460   | MEF2C | 1 |
| hsa-miR-3085 XM_0244460   | MEF2C | 1 |
| hsa-miR-652S XM_0244460   | MEF2C | 1 |
| hsa-miR-1211 XM_0244460   | MEF2C | 1 |
| hsa-miR-1211 XM_0244460   | MEF2C | 1 |
| hsa-miR-1212 XM_0244460   | MEF2C | 1 |
| hsa-miR-1212 XM_0244460   | MEF2C | 1 |
| hsa-miR-1213 XM_0244460   | MEF2C | 1 |
| hsa-let-7a-2-3 NM_002397  | MEF2C | 1 |
| hsa-let-7e-3p NM_002397   | MEF2C | 1 |
| hsa-let-7e-3p NM_002397   | MEF2C | 1 |
| hsa-let-7f-1-3j NM_002397 | MEF2C | 1 |
| hsa-miR-15a- NM_002397    | MEF2C | 1 |
| hsa-miR-17-5j NM_002397   | MEF2C | 1 |
| hsa-miR-18a- NM_002397    | MEF2C | 1 |



|               |           |       |   |
|---------------|-----------|-------|---|
| hsa-miR-23a-  | NM_002397 | MEF2C | 1 |
| hsa-miR-25-5j | NM_002397 | MEF2C | 1 |
| hsa-miR-26b-  | NM_002397 | MEF2C | 1 |
| hsa-miR-29a-  | NM_002397 | MEF2C | 1 |
| hsa-miR-103a  | NM_002397 | MEF2C | 1 |
| hsa-miR-103a  | NM_002397 | MEF2C | 1 |
| hsa-miR-106a  | NM_002397 | MEF2C | 1 |
| hsa-miR-107   | NM_002397 | MEF2C | 1 |
| hsa-miR-129-  | NM_002397 | MEF2C | 1 |
| hsa-miR-30d-  | NM_002397 | MEF2C | 1 |
| hsa-miR-147a  | NM_002397 | MEF2C | 1 |
| hsa-miR-147a  | NM_002397 | MEF2C | 1 |
| hsa-miR-10b-  | NM_002397 | MEF2C | 1 |
| hsa-miR-183-  | NM_002397 | MEF2C | 1 |
| hsa-miR-204-  | NM_002397 | MEF2C | 1 |
| hsa-miR-205-  | NM_002397 | MEF2C | 1 |
| hsa-miR-210-  | NM_002397 | MEF2C | 1 |
| hsa-miR-211-  | NM_002397 | MEF2C | 1 |
| hsa-miR-212-  | NM_002397 | MEF2C | 1 |
| hsa-miR-214-  | NM_002397 | MEF2C | 1 |
| hsa-miR-222-  | NM_002397 | MEF2C | 1 |
| hsa-let-7i-3p | NM_002397 | MEF2C | 1 |
| hsa-miR-23b-  | NM_002397 | MEF2C | 1 |
| hsa-miR-125t  | NM_002397 | MEF2C | 1 |
| hsa-miR-137-  | NM_002397 | MEF2C | 1 |
| hsa-miR-137-  | NM_002397 | MEF2C | 1 |
| hsa-miR-142-  | NM_002397 | MEF2C | 1 |
| hsa-miR-144-  | NM_002397 | MEF2C | 1 |
| hsa-miR-145-  | NM_002397 | MEF2C | 1 |
| hsa-miR-191-  | NM_002397 | MEF2C | 1 |
| hsa-miR-191-  | NM_002397 | MEF2C | 1 |
| hsa-miR-125a  | NM_002397 | MEF2C | 1 |
| hsa-miR-127-  | NM_002397 | MEF2C | 1 |
| hsa-miR-129-  | NM_002397 | MEF2C | 1 |
| hsa-miR-154-  | NM_002397 | MEF2C | 1 |
| hsa-miR-185-  | NM_002397 | MEF2C | 1 |
| hsa-miR-186-  | NM_002397 | MEF2C | 1 |
| hsa-miR-188-  | NM_002397 | MEF2C | 1 |
| hsa-miR-188-  | NM_002397 | MEF2C | 1 |
| hsa-miR-206   | NM_002397 | MEF2C | 1 |
| hsa-miR-320a  | NM_002397 | MEF2C | 1 |
| hsa-miR-200c  | NM_002397 | MEF2C | 1 |
| hsa-miR-128-  | NM_002397 | MEF2C | 1 |
| hsa-miR-296-  | NM_002397 | MEF2C | 1 |
| hsa-miR-26a-  | NM_002397 | MEF2C | 1 |
| hsa-miR-363-  | NM_002397 | MEF2C | 1 |
| hsa-miR-302b  | NM_002397 | MEF2C | 1 |
| hsa-miR-302c  | NM_002397 | MEF2C | 1 |
| hsa-miR-302d  | NM_002397 | MEF2C | 1 |
| hsa-miR-370-  | NM_002397 | MEF2C | 1 |
| hsa-miR-371a  | NM_002397 | MEF2C | 1 |
| hsa-miR-372-  | NM_002397 | MEF2C | 1 |
| hsa-miR-372-  | NM_002397 | MEF2C | 1 |
| hsa-miR-376a  | NM_002397 | MEF2C | 1 |
| hsa-miR-330-  | NM_002397 | MEF2C | 1 |
| hsa-miR-328-  | NM_002397 | MEF2C | 1 |
| hsa-miR-328-  | NM_002397 | MEF2C | 1 |
| hsa-miR-148t  | NM_002397 | MEF2C | 1 |
| hsa-miR-331-  | NM_002397 | MEF2C | 1 |
| hsa-miR-324-  | NM_002397 | MEF2C | 1 |
| hsa-miR-325   | NM_002397 | MEF2C | 1 |
| hsa-miR-18b-  | NM_002397 | MEF2C | 1 |
| hsa-miR-20b-  | NM_002397 | MEF2C | 1 |
| hsa-miR-329-  | NM_002397 | MEF2C | 1 |
| hsa-miR-329-  | NM_002397 | MEF2C | 1 |
| hsa-miR-329-  | NM_002397 | MEF2C | 1 |
| hsa-miR-409-  | NM_002397 | MEF2C | 1 |
| hsa-miR-412-  | NM_002397 | MEF2C | 1 |
| hsa-miR-483-  | NM_002397 | MEF2C | 1 |
| hsa-miR-484   | NM_002397 | MEF2C | 1 |
| hsa-miR-488-  | NM_002397 | MEF2C | 1 |
| hsa-miR-490-  | NM_002397 | MEF2C | 1 |
| hsa-miR-146t  | NM_002397 | MEF2C | 1 |
| hsa-miR-202-  | NM_002397 | MEF2C | 1 |
| hsa-miR-492   | NM_002397 | MEF2C | 1 |
| hsa-miR-494-  | NM_002397 | MEF2C | 1 |
| hsa-miR-193t  | NM_002397 | MEF2C | 1 |
| hsa-miR-519e  | NM_002397 | MEF2C | 1 |
| hsa-miR-520f  | NM_002397 | MEF2C | 1 |
| hsa-miR-523-  | NM_002397 | MEF2C | 1 |
| hsa-miR-526a  | NM_002397 | MEF2C | 1 |
| hsa-miR-518c  | NM_002397 | MEF2C | 1 |
| hsa-miR-524-  | NM_002397 | MEF2C | 1 |
| hsa-miR-519d  | NM_002397 | MEF2C | 1 |
| hsa-miR-518a  | NM_002397 | MEF2C | 1 |
| hsa-miR-518d  | NM_002397 | MEF2C | 1 |
| hsa-miR-520h  | NM_002397 | MEF2C | 1 |
| hsa-miR-500a  | NM_002397 | MEF2C | 1 |
| hsa-miR-501-  | NM_002397 | MEF2C | 1 |
| hsa-miR-501-  | NM_002397 | MEF2C | 1 |
| hsa-miR-502-  | NM_002397 | MEF2C | 1 |
| hsa-miR-504-  | NM_002397 | MEF2C | 1 |
| hsa-miR-514a  | NM_002397 | MEF2C | 1 |
| hsa-miR-455-  | NM_002397 | MEF2C | 1 |

|              |           |       |   |
|--------------|-----------|-------|---|
| hsa-miR-487t | NM_002397 | MEF2C | 1 |
| hsa-miR-487t | NM_002397 | MEF2C | 1 |
| hsa-miR-487t | NM_002397 | MEF2C | 1 |
| hsa-miR-487t | NM_002397 | MEF2C | 1 |
| hsa-miR-552- | NM_002397 | MEF2C | 1 |
| hsa-miR-552- | NM_002397 | MEF2C | 1 |
| hsa-miR-551t | NM_002397 | MEF2C | 1 |
| hsa-miR-574- | NM_002397 | MEF2C | 1 |
| hsa-miR-584- | NM_002397 | MEF2C | 1 |
| hsa-miR-585- | NM_002397 | MEF2C | 1 |
| hsa-miR-550a | NM_002397 | MEF2C | 1 |
| hsa-miR-603  | NM_002397 | MEF2C | 1 |
| hsa-miR-615- | NM_002397 | MEF2C | 1 |
| hsa-miR-615- | NM_002397 | MEF2C | 1 |
| hsa-miR-616- | NM_002397 | MEF2C | 1 |
| hsa-miR-619- | NM_002397 | MEF2C | 1 |
| hsa-miR-33b- | NM_002397 | MEF2C | 1 |
| hsa-miR-638  | NM_002397 | MEF2C | 1 |
| hsa-miR-642a | NM_002397 | MEF2C | 1 |
| hsa-miR-642a | NM_002397 | MEF2C | 1 |
| hsa-miR-644a | NM_002397 | MEF2C | 1 |
| hsa-miR-645  | NM_002397 | MEF2C | 1 |
| hsa-miR-646  | NM_002397 | MEF2C | 1 |
| hsa-miR-648  | NM_002397 | MEF2C | 1 |
| hsa-miR-650  | NM_002397 | MEF2C | 1 |
| hsa-miR-652- | NM_002397 | MEF2C | 1 |
| hsa-miR-549a | NM_002397 | MEF2C | 1 |
| hsa-miR-659- | NM_002397 | MEF2C | 1 |
| hsa-miR-659- | NM_002397 | MEF2C | 1 |
| hsa-miR-668- | NM_002397 | MEF2C | 1 |
| hsa-miR-1224 | NM_002397 | MEF2C | 1 |
| hsa-miR-320t | NM_002397 | MEF2C | 1 |
| hsa-miR-320t | NM_002397 | MEF2C | 1 |
| hsa-miR-320c | NM_002397 | MEF2C | 1 |
| hsa-miR-1271 | NM_002397 | MEF2C | 1 |
| hsa-miR-449c | NM_002397 | MEF2C | 1 |
| hsa-miR-449c | NM_002397 | MEF2C | 1 |
| hsa-miR-449c | NM_002397 | MEF2C | 1 |
| hsa-miR-670- | NM_002397 | MEF2C | 1 |
| hsa-miR-2113 | NM_002397 | MEF2C | 1 |
| hsa-miR-764  | NM_002397 | MEF2C | 1 |
| hsa-miR-765  | NM_002397 | MEF2C | 1 |
| hsa-miR-675- | NM_002397 | MEF2C | 1 |
| hsa-miR-891a | NM_002397 | MEF2C | 1 |
| hsa-miR-891a | NM_002397 | MEF2C | 1 |
| hsa-miR-450t | NM_002397 | MEF2C | 1 |
| hsa-miR-874- | NM_002397 | MEF2C | 1 |
| hsa-miR-892t | NM_002397 | MEF2C | 1 |
| hsa-miR-892t | NM_002397 | MEF2C | 1 |
| hsa-miR-887- | NM_002397 | MEF2C | 1 |
| hsa-miR-873- | NM_002397 | MEF2C | 1 |
| hsa-miR-760  | NM_002397 | MEF2C | 1 |
| hsa-miR-760  | NM_002397 | MEF2C | 1 |
| hsa-miR-933  | NM_002397 | MEF2C | 1 |
| hsa-miR-935  | NM_002397 | MEF2C | 1 |
| hsa-miR-936  | NM_002397 | MEF2C | 1 |
| hsa-miR-937- | NM_002397 | MEF2C | 1 |
| hsa-miR-939- | NM_002397 | MEF2C | 1 |
| hsa-miR-939- | NM_002397 | MEF2C | 1 |
| hsa-miR-940  | NM_002397 | MEF2C | 1 |
| hsa-miR-118C | NM_002397 | MEF2C | 1 |
| hsa-miR-1225 | NM_002397 | MEF2C | 1 |
| hsa-miR-1227 | NM_002397 | MEF2C | 1 |
| hsa-miR-1228 | NM_002397 | MEF2C | 1 |
| hsa-miR-1229 | NM_002397 | MEF2C | 1 |
| hsa-miR-1229 | NM_002397 | MEF2C | 1 |
| hsa-miR-1233 | NM_002397 | MEF2C | 1 |
| hsa-miR-1234 | NM_002397 | MEF2C | 1 |
| hsa-miR-1236 | NM_002397 | MEF2C | 1 |
| hsa-miR-1237 | NM_002397 | MEF2C | 1 |
| hsa-miR-1237 | NM_002397 | MEF2C | 1 |
| hsa-miR-1204 | NM_002397 | MEF2C | 1 |
| hsa-miR-1286 | NM_002397 | MEF2C | 1 |
| hsa-miR-1287 | NM_002397 | MEF2C | 1 |
| hsa-miR-1303 | NM_002397 | MEF2C | 1 |
| hsa-miR-1244 | NM_002397 | MEF2C | 1 |
| hsa-miR-1247 | NM_002397 | MEF2C | 1 |
| hsa-miR-1248 | NM_002397 | MEF2C | 1 |
| hsa-miR-1249 | NM_002397 | MEF2C | 1 |
| hsa-miR-1251 | NM_002397 | MEF2C | 1 |
| hsa-miR-1251 | NM_002397 | MEF2C | 1 |
| hsa-miR-1253 | NM_002397 | MEF2C | 1 |
| hsa-miR-1263 | NM_002397 | MEF2C | 1 |
| hsa-miR-1265 | NM_002397 | MEF2C | 1 |
| hsa-miR-1266 | NM_002397 | MEF2C | 1 |
| hsa-miR-1269 | NM_002397 | MEF2C | 1 |
| hsa-miR-1272 | NM_002397 | MEF2C | 1 |
| hsa-miR-1281 | NM_002397 | MEF2C | 1 |
| hsa-miR-1292 | NM_002397 | MEF2C | 1 |
| hsa-miR-1292 | NM_002397 | MEF2C | 1 |
| hsa-miR-147C | NM_002397 | MEF2C | 1 |
| hsa-miR-1538 | NM_002397 | MEF2C | 1 |
| hsa-miR-1539 | NM_002397 | MEF2C | 1 |
| hsa-miR-103t | NM_002397 | MEF2C | 1 |

|              |           |       |   |
|--------------|-----------|-------|---|
| hsa-miR-103b | NM_002397 | MEF2C | 1 |
| hsa-miR-320d | NM_002397 | MEF2C | 1 |
| hsa-miR-1911 | NM_002397 | MEF2C | 1 |
| hsa-miR-1914 | NM_002397 | MEF2C | 1 |
| hsa-miR-1973 | NM_002397 | MEF2C | 1 |
| hsa-miR-1976 | NM_002397 | MEF2C | 1 |
| hsa-miR-2116 | NM_002397 | MEF2C | 1 |
| hsa-miR-2276 | NM_002397 | MEF2C | 1 |
| hsa-miR-2277 | NM_002397 | MEF2C | 1 |
| hsa-miR-2277 | NM_002397 | MEF2C | 1 |
| hsa-miR-2278 | NM_002397 | MEF2C | 1 |
| hsa-miR-718  | NM_002397 | MEF2C | 1 |
| hsa-miR-2909 | NM_002397 | MEF2C | 1 |
| hsa-miR-3121 | NM_002397 | MEF2C | 1 |
| hsa-miR-3122 | NM_002397 | MEF2C | 1 |
| hsa-miR-3125 | NM_002397 | MEF2C | 1 |
| hsa-miR-3126 | NM_002397 | MEF2C | 1 |
| hsa-miR-3127 | NM_002397 | MEF2C | 1 |
| hsa-miR-3129 | NM_002397 | MEF2C | 1 |
| hsa-miR-313C | NM_002397 | MEF2C | 1 |
| hsa-miR-466  | NM_002397 | MEF2C | 1 |
| hsa-miR-544b | NM_002397 | MEF2C | 1 |
| hsa-miR-314C | NM_002397 | MEF2C | 1 |
| hsa-miR-3142 | NM_002397 | MEF2C | 1 |
| hsa-miR-3144 | NM_002397 | MEF2C | 1 |
| hsa-miR-3145 | NM_002397 | MEF2C | 1 |
| hsa-miR-3145 | NM_002397 | MEF2C | 1 |
| hsa-miR-3149 | NM_002397 | MEF2C | 1 |
| hsa-miR-3151 | NM_002397 | MEF2C | 1 |
| hsa-miR-3151 | NM_002397 | MEF2C | 1 |
| hsa-miR-3151 | NM_002397 | MEF2C | 1 |
| hsa-miR-3074 | NM_002397 | MEF2C | 1 |
| hsa-miR-3158 | NM_002397 | MEF2C | 1 |
| hsa-miR-3158 | NM_002397 | MEF2C | 1 |
| hsa-miR-3162 | NM_002397 | MEF2C | 1 |
| hsa-miR-3169 | NM_002397 | MEF2C | 1 |
| hsa-miR-317C | NM_002397 | MEF2C | 1 |
| hsa-miR-3173 | NM_002397 | MEF2C | 1 |
| hsa-miR-3175 | NM_002397 | MEF2C | 1 |
| hsa-miR-3176 | NM_002397 | MEF2C | 1 |
| hsa-miR-3184 | NM_002397 | MEF2C | 1 |
| hsa-miR-3186 | NM_002397 | MEF2C | 1 |
| hsa-miR-3186 | NM_002397 | MEF2C | 1 |
| hsa-miR-3187 | NM_002397 | MEF2C | 1 |
| hsa-miR-3187 | NM_002397 | MEF2C | 1 |
| hsa-miR-3188 | NM_002397 | MEF2C | 1 |
| hsa-miR-3188 | NM_002397 | MEF2C | 1 |
| hsa-miR-320e | NM_002397 | MEF2C | 1 |
| hsa-miR-3191 | NM_002397 | MEF2C | 1 |
| hsa-miR-3194 | NM_002397 | MEF2C | 1 |
| hsa-miR-3194 | NM_002397 | MEF2C | 1 |
| hsa-miR-3195 | NM_002397 | MEF2C | 1 |
| hsa-miR-3199 | NM_002397 | MEF2C | 1 |
| hsa-miR-3202 | NM_002397 | MEF2C | 1 |
| hsa-miR-4297 | NM_002397 | MEF2C | 1 |
| hsa-miR-4299 | NM_002397 | MEF2C | 1 |
| hsa-miR-4298 | NM_002397 | MEF2C | 1 |
| hsa-miR-4313 | NM_002397 | MEF2C | 1 |
| hsa-miR-4322 | NM_002397 | MEF2C | 1 |
| hsa-miR-4324 | NM_002397 | MEF2C | 1 |
| hsa-miR-4259 | NM_002397 | MEF2C | 1 |
| hsa-miR-426C | NM_002397 | MEF2C | 1 |
| hsa-miR-426C | NM_002397 | MEF2C | 1 |
| hsa-miR-4251 | NM_002397 | MEF2C | 1 |
| hsa-miR-4261 | NM_002397 | MEF2C | 1 |
| hsa-miR-4269 | NM_002397 | MEF2C | 1 |
| hsa-miR-4281 | NM_002397 | MEF2C | 1 |
| hsa-miR-4279 | NM_002397 | MEF2C | 1 |
| hsa-miR-4278 | NM_002397 | MEF2C | 1 |
| hsa-miR-4283 | NM_002397 | MEF2C | 1 |
| hsa-miR-4286 | NM_002397 | MEF2C | 1 |
| hsa-miR-4287 | NM_002397 | MEF2C | 1 |
| hsa-miR-4289 | NM_002397 | MEF2C | 1 |
| hsa-miR-500b | NM_002397 | MEF2C | 1 |
| hsa-miR-3619 | NM_002397 | MEF2C | 1 |
| hsa-miR-23c  | NM_002397 | MEF2C | 1 |
| hsa-miR-362C | NM_002397 | MEF2C | 1 |
| hsa-miR-362C | NM_002397 | MEF2C | 1 |
| hsa-miR-3621 | NM_002397 | MEF2C | 1 |
| hsa-miR-3622 | NM_002397 | MEF2C | 1 |
| hsa-miR-3622 | NM_002397 | MEF2C | 1 |
| hsa-miR-3622 | NM_002397 | MEF2C | 1 |
| hsa-miR-3649 | NM_002397 | MEF2C | 1 |
| hsa-miR-365C | NM_002397 | MEF2C | 1 |
| hsa-miR-3663 | NM_002397 | MEF2C | 1 |
| hsa-miR-3667 | NM_002397 | MEF2C | 1 |
| hsa-miR-3677 | NM_002397 | MEF2C | 1 |
| hsa-miR-3677 | NM_002397 | MEF2C | 1 |
| hsa-miR-3685 | NM_002397 | MEF2C | 1 |
| hsa-miR-3688 | NM_002397 | MEF2C | 1 |
| hsa-miR-369C | NM_002397 | MEF2C | 1 |
| hsa-miR-369C | NM_002397 | MEF2C | 1 |
| hsa-miR-3907 | NM_002397 | MEF2C | 1 |
| hsa-miR-3908 | NM_002397 | MEF2C | 1 |
| hsa-miR-3909 | NM_002397 | MEF2C | 1 |

|                        |       |   |
|------------------------|-------|---|
| hsa-miR-3915 NM_002397 | MEF2C | 1 |
| hsa-miR-3924 NM_002397 | MEF2C | 1 |
| hsa-miR-676- NM_002397 | MEF2C | 1 |
| hsa-miR-3936 NM_002397 | MEF2C | 1 |
| hsa-miR-3935 NM_002397 | MEF2C | 1 |
| hsa-miR-3940 NM_002397 | MEF2C | 1 |
| hsa-miR-3943 NM_002397 | MEF2C | 1 |
| hsa-miR-3945 NM_002397 | MEF2C | 1 |
| hsa-miR-642b NM_002397 | MEF2C | 1 |
| hsa-miR-642b NM_002397 | MEF2C | 1 |
| hsa-miR-550b NM_002397 | MEF2C | 1 |
| hsa-miR-548a NM_002397 | MEF2C | 1 |
| hsa-miR-4418 NM_002397 | MEF2C | 1 |
| hsa-miR-4423 NM_002397 | MEF2C | 1 |
| hsa-miR-4425 NM_002397 | MEF2C | 1 |
| hsa-miR-4436 NM_002397 | MEF2C | 1 |
| hsa-miR-4442 NM_002397 | MEF2C | 1 |
| hsa-miR-4446 NM_002397 | MEF2C | 1 |
| hsa-miR-4446 NM_002397 | MEF2C | 1 |
| hsa-miR-548a NM_002397 | MEF2C | 1 |
| hsa-miR-4454 NM_002397 | MEF2C | 1 |
| hsa-miR-4456 NM_002397 | MEF2C | 1 |
| hsa-miR-4463 NM_002397 | MEF2C | 1 |
| hsa-miR-4471 NM_002397 | MEF2C | 1 |
| hsa-miR-4472 NM_002397 | MEF2C | 1 |
| hsa-miR-3685 NM_002397 | MEF2C | 1 |
| hsa-miR-4485 NM_002397 | MEF2C | 1 |
| hsa-miR-4493 NM_002397 | MEF2C | 1 |
| hsa-miR-4498 NM_002397 | MEF2C | 1 |
| hsa-miR-4499 NM_002397 | MEF2C | 1 |
| hsa-miR-4502 NM_002397 | MEF2C | 1 |
| hsa-miR-2392 NM_002397 | MEF2C | 1 |
| hsa-miR-4520 NM_002397 | MEF2C | 1 |
| hsa-miR-1265 NM_002397 | MEF2C | 1 |
| hsa-miR-4523 NM_002397 | MEF2C | 1 |
| hsa-miR-4524 NM_002397 | MEF2C | 1 |
| hsa-miR-4525 NM_002397 | MEF2C | 1 |
| hsa-miR-4536 NM_002397 | MEF2C | 1 |
| hsa-miR-3978 NM_002397 | MEF2C | 1 |
| hsa-miR-4642 NM_002397 | MEF2C | 1 |
| hsa-miR-4642 NM_002397 | MEF2C | 1 |
| hsa-miR-4646 NM_002397 | MEF2C | 1 |
| hsa-miR-4646 NM_002397 | MEF2C | 1 |
| hsa-miR-4649 NM_002397 | MEF2C | 1 |
| hsa-miR-4651 NM_002397 | MEF2C | 1 |
| hsa-miR-4655 NM_002397 | MEF2C | 1 |
| hsa-miR-4657 NM_002397 | MEF2C | 1 |
| hsa-miR-4667 NM_002397 | MEF2C | 1 |
| hsa-miR-4667 NM_002397 | MEF2C | 1 |
| hsa-miR-4675 NM_002397 | MEF2C | 1 |
| hsa-miR-4681 NM_002397 | MEF2C | 1 |
| hsa-miR-4682 NM_002397 | MEF2C | 1 |
| hsa-miR-4685 NM_002397 | MEF2C | 1 |
| hsa-miR-4686 NM_002397 | MEF2C | 1 |
| hsa-miR-4687 NM_002397 | MEF2C | 1 |
| hsa-miR-4700 NM_002397 | MEF2C | 1 |
| hsa-miR-4701 NM_002397 | MEF2C | 1 |
| hsa-miR-4703 NM_002397 | MEF2C | 1 |
| hsa-miR-4706 NM_002397 | MEF2C | 1 |
| hsa-miR-4706 NM_002397 | MEF2C | 1 |
| hsa-miR-4706 NM_002397 | MEF2C | 1 |
| hsa-miR-4707 NM_002397 | MEF2C | 1 |
| hsa-miR-4708 NM_002397 | MEF2C | 1 |
| hsa-miR-4709 NM_002397 | MEF2C | 1 |
| hsa-miR-4714 NM_002397 | MEF2C | 1 |
| hsa-miR-4716 NM_002397 | MEF2C | 1 |
| hsa-miR-4716 NM_002397 | MEF2C | 1 |
| hsa-miR-4716 NM_002397 | MEF2C | 1 |
| hsa-miR-4717 NM_002397 | MEF2C | 1 |
| hsa-miR-4720 NM_002397 | MEF2C | 1 |
| hsa-miR-4725 NM_002397 | MEF2C | 1 |
| hsa-miR-4726 NM_002397 | MEF2C | 1 |
| hsa-miR-4727 NM_002397 | MEF2C | 1 |
| hsa-miR-4728 NM_002397 | MEF2C | 1 |
| hsa-miR-4737 NM_002397 | MEF2C | 1 |
| hsa-miR-4745 NM_002397 | MEF2C | 1 |
| hsa-miR-4745 NM_002397 | MEF2C | 1 |
| hsa-miR-4745 NM_002397 | MEF2C | 1 |
| hsa-miR-4757 NM_002397 | MEF2C | 1 |
| hsa-miR-4766 NM_002397 | MEF2C | 1 |
| hsa-miR-4767 NM_002397 | MEF2C | 1 |
| hsa-miR-4768 NM_002397 | MEF2C | 1 |
| hsa-miR-4776 NM_002397 | MEF2C | 1 |
| hsa-miR-4436 NM_002397 | MEF2C | 1 |
| hsa-miR-4783 NM_002397 | MEF2C | 1 |
| hsa-miR-4783 NM_002397 | MEF2C | 1 |
| hsa-miR-4784 NM_002397 | MEF2C | 1 |
| hsa-miR-4787 NM_002397 | MEF2C | 1 |
| hsa-miR-4787 NM_002397 | MEF2C | 1 |
| hsa-miR-4789 NM_002397 | MEF2C | 1 |
| hsa-miR-4797 NM_002397 | MEF2C | 1 |
| hsa-miR-4797 NM_002397 | MEF2C | 1 |
| hsa-miR-4800 NM_002397 | MEF2C | 1 |
| hsa-miR-4804 NM_002397 | MEF2C | 1 |





|                            |       |   |
|----------------------------|-------|---|
| hsa-miR-1039 NM_002397     | MEF2C | 1 |
| hsa-miR-1039 NM_002397     | MEF2C | 1 |
| hsa-miR-1052 NM_002397     | MEF2C | 1 |
| hsa-miR-1118 NM_002397     | MEF2C | 1 |
| hsa-miR-1139 NM_002397     | MEF2C | 1 |
| hsa-miR-3059 NM_002397     | MEF2C | 1 |
| hsa-miR-3059 NM_002397     | MEF2C | 1 |
| hsa-miR-3085 NM_002397     | MEF2C | 1 |
| hsa-miR-1211 NM_002397     | MEF2C | 1 |
| hsa-miR-1211 NM_002397     | MEF2C | 1 |
| hsa-miR-1212 NM_002397     | MEF2C | 1 |
| hsa-let-7a-2-3 NM_0013643  | MEF2C | 1 |
| hsa-let-7c-3p NM_0013643   | MEF2C | 1 |
| hsa-let-7e-3p NM_0013643   | MEF2C | 1 |
| hsa-let-7e-3p NM_0013643   | MEF2C | 1 |
| hsa-let-7f-1-3j NM_0013643 | MEF2C | 1 |
| hsa-miR-25-5j NM_0013643   | MEF2C | 1 |
| hsa-miR-27a- NM_0013643    | MEF2C | 1 |
| hsa-miR-29a- NM_0013643    | MEF2C | 1 |
| hsa-miR-33a- NM_0013643    | MEF2C | 1 |
| hsa-miR-92a- NM_0013643    | MEF2C | 1 |
| hsa-miR-105- NM_0013643    | MEF2C | 1 |
| hsa-miR-107 NM_0013643     | MEF2C | 1 |
| hsa-miR-129- NM_0013643    | MEF2C | 1 |
| hsa-miR-30d- NM_0013643    | MEF2C | 1 |
| hsa-miR-183- NM_0013643    | MEF2C | 1 |
| hsa-miR-187- NM_0013643    | MEF2C | 1 |
| hsa-miR-205- NM_0013643    | MEF2C | 1 |
| hsa-miR-210- NM_0013643    | MEF2C | 1 |
| hsa-miR-211- NM_0013643    | MEF2C | 1 |
| hsa-miR-214- NM_0013643    | MEF2C | 1 |
| hsa-miR-218- NM_0013643    | MEF2C | 1 |
| hsa-miR-221- NM_0013643    | MEF2C | 1 |
| hsa-miR-222- NM_0013643    | MEF2C | 1 |
| hsa-let-7i-3p NM_0013643   | MEF2C | 1 |
| hsa-let-7i-3p NM_0013643   | MEF2C | 1 |
| hsa-miR-125t NM_0013643    | MEF2C | 1 |
| hsa-miR-137- NM_0013643    | MEF2C | 1 |
| hsa-miR-144- NM_0013643    | MEF2C | 1 |
| hsa-miR-191- NM_0013643    | MEF2C | 1 |
| hsa-miR-125a NM_0013643    | MEF2C | 1 |
| hsa-miR-129- NM_0013643    | MEF2C | 1 |
| hsa-miR-146a NM_0013643    | MEF2C | 1 |
| hsa-miR-149- NM_0013643    | MEF2C | 1 |
| hsa-miR-154- NM_0013643    | MEF2C | 1 |
| hsa-miR-186- NM_0013643    | MEF2C | 1 |
| hsa-miR-188- NM_0013643    | MEF2C | 1 |
| hsa-miR-320a NM_0013643    | MEF2C | 1 |
| hsa-miR-128- NM_0013643    | MEF2C | 1 |
| hsa-miR-296- NM_0013643    | MEF2C | 1 |
| hsa-miR-362- NM_0013643    | MEF2C | 1 |
| hsa-miR-302b NM_0013643    | MEF2C | 1 |
| hsa-miR-302b NM_0013643    | MEF2C | 1 |
| hsa-miR-370- NM_0013643    | MEF2C | 1 |
| hsa-miR-371a NM_0013643    | MEF2C | 1 |
| hsa-miR-372- NM_0013643    | MEF2C | 1 |
| hsa-miR-372- NM_0013643    | MEF2C | 1 |
| hsa-miR-376a NM_0013643    | MEF2C | 1 |
| hsa-miR-383- NM_0013643    | MEF2C | 1 |
| hsa-miR-330- NM_0013643    | MEF2C | 1 |
| hsa-miR-328- NM_0013643    | MEF2C | 1 |
| hsa-miR-328- NM_0013643    | MEF2C | 1 |
| hsa-miR-148b NM_0013643    | MEF2C | 1 |
| hsa-miR-324- NM_0013643    | MEF2C | 1 |
| hsa-miR-448 NM_0013643     | MEF2C | 1 |
| hsa-miR-329- NM_0013643    | MEF2C | 1 |
| hsa-miR-409- NM_0013643    | MEF2C | 1 |
| hsa-miR-483- NM_0013643    | MEF2C | 1 |
| hsa-miR-484 NM_0013643     | MEF2C | 1 |
| hsa-miR-202- NM_0013643    | MEF2C | 1 |
| hsa-miR-492 NM_0013643     | MEF2C | 1 |
| hsa-miR-494- NM_0013643    | MEF2C | 1 |
| hsa-miR-193b NM_0013643    | MEF2C | 1 |
| hsa-miR-497- NM_0013643    | MEF2C | 1 |
| hsa-miR-512- NM_0013643    | MEF2C | 1 |
| hsa-miR-519e NM_0013643    | MEF2C | 1 |
| hsa-miR-519e NM_0013643    | MEF2C | 1 |
| hsa-miR-523- NM_0013643    | MEF2C | 1 |
| hsa-miR-519d NM_0013643    | MEF2C | 1 |
| hsa-miR-520g NM_0013643    | MEF2C | 1 |
| hsa-miR-520g NM_0013643    | MEF2C | 1 |
| hsa-miR-520h NM_0013643    | MEF2C | 1 |
| hsa-miR-516a NM_0013643    | MEF2C | 1 |
| hsa-miR-504- NM_0013643    | MEF2C | 1 |
| hsa-miR-505- NM_0013643    | MEF2C | 1 |
| hsa-miR-509- NM_0013643    | MEF2C | 1 |
| hsa-miR-514a NM_0013643    | MEF2C | 1 |
| hsa-miR-532- NM_0013643    | MEF2C | 1 |
| hsa-miR-487b NM_0013643    | MEF2C | 1 |
| hsa-miR-487b NM_0013643    | MEF2C | 1 |
| hsa-miR-554 NM_0013643     | MEF2C | 1 |
| hsa-miR-585- NM_0013643    | MEF2C | 1 |
| hsa-miR-588 NM_0013643     | MEF2C | 1 |
| hsa-miR-550a NM_0013643    | MEF2C | 1 |

|              |            |       |   |
|--------------|------------|-------|---|
| hsa-miR-592  | NM_0013643 | MEF2C | 1 |
| hsa-miR-603  | NM_0013643 | MEF2C | 1 |
| hsa-miR-615- | NM_0013643 | MEF2C | 1 |
| hsa-miR-618  | NM_0013643 | MEF2C | 1 |
| hsa-miR-619- | NM_0013643 | MEF2C | 1 |
| hsa-miR-625- | NM_0013643 | MEF2C | 1 |
| hsa-miR-627- | NM_0013643 | MEF2C | 1 |
| hsa-miR-642a | NM_0013643 | MEF2C | 1 |
| hsa-miR-646  | NM_0013643 | MEF2C | 1 |
| hsa-miR-648  | NM_0013643 | MEF2C | 1 |
| hsa-miR-652- | NM_0013643 | MEF2C | 1 |
| hsa-miR-652- | NM_0013643 | MEF2C | 1 |
| hsa-miR-654- | NM_0013643 | MEF2C | 1 |
| hsa-miR-549a | NM_0013643 | MEF2C | 1 |
| hsa-miR-659- | NM_0013643 | MEF2C | 1 |
| hsa-miR-659- | NM_0013643 | MEF2C | 1 |
| hsa-miR-758- | NM_0013643 | MEF2C | 1 |
| hsa-miR-1224 | NM_0013643 | MEF2C | 1 |
| hsa-miR-320b | NM_0013643 | MEF2C | 1 |
| hsa-miR-320c | NM_0013643 | MEF2C | 1 |
| hsa-miR-1296 | NM_0013643 | MEF2C | 1 |
| hsa-miR-1271 | NM_0013643 | MEF2C | 1 |
| hsa-miR-454- | NM_0013643 | MEF2C | 1 |
| hsa-miR-449c | NM_0013643 | MEF2C | 1 |
| hsa-miR-769- | NM_0013643 | MEF2C | 1 |
| hsa-miR-670- | NM_0013643 | MEF2C | 1 |
| hsa-miR-764  | NM_0013643 | MEF2C | 1 |
| hsa-miR-675- | NM_0013643 | MEF2C | 1 |
| hsa-miR-891a | NM_0013643 | MEF2C | 1 |
| hsa-miR-891a | NM_0013643 | MEF2C | 1 |
| hsa-miR-875- | NM_0013643 | MEF2C | 1 |
| hsa-miR-708- | NM_0013643 | MEF2C | 1 |
| hsa-miR-744- | NM_0013643 | MEF2C | 1 |
| hsa-miR-887- | NM_0013643 | MEF2C | 1 |
| hsa-miR-933  | NM_0013643 | MEF2C | 1 |
| hsa-miR-935  | NM_0013643 | MEF2C | 1 |
| hsa-miR-936  | NM_0013643 | MEF2C | 1 |
| hsa-miR-937- | NM_0013643 | MEF2C | 1 |
| hsa-miR-940  | NM_0013643 | MEF2C | 1 |
| hsa-miR-1178 | NM_0013643 | MEF2C | 1 |
| hsa-miR-1178 | NM_0013643 | MEF2C | 1 |
| hsa-miR-118C | NM_0013643 | MEF2C | 1 |
| hsa-miR-1227 | NM_0013643 | MEF2C | 1 |
| hsa-miR-1229 | NM_0013643 | MEF2C | 1 |
| hsa-miR-1233 | NM_0013643 | MEF2C | 1 |
| hsa-miR-1234 | NM_0013643 | MEF2C | 1 |
| hsa-miR-1238 | NM_0013643 | MEF2C | 1 |
| hsa-miR-1207 | NM_0013643 | MEF2C | 1 |
| hsa-miR-1286 | NM_0013643 | MEF2C | 1 |
| hsa-miR-1287 | NM_0013643 | MEF2C | 1 |
| hsa-miR-1287 | NM_0013643 | MEF2C | 1 |
| hsa-miR-1303 | NM_0013643 | MEF2C | 1 |
| hsa-miR-1244 | NM_0013643 | MEF2C | 1 |
| hsa-miR-1247 | NM_0013643 | MEF2C | 1 |
| hsa-miR-1248 | NM_0013643 | MEF2C | 1 |
| hsa-miR-1253 | NM_0013643 | MEF2C | 1 |
| hsa-miR-1263 | NM_0013643 | MEF2C | 1 |
| hsa-miR-1266 | NM_0013643 | MEF2C | 1 |
| hsa-miR-1281 | NM_0013643 | MEF2C | 1 |
| hsa-miR-1292 | NM_0013643 | MEF2C | 1 |
| hsa-miR-147C | NM_0013643 | MEF2C | 1 |
| hsa-miR-103b | NM_0013643 | MEF2C | 1 |
| hsa-miR-1912 | NM_0013643 | MEF2C | 1 |
| hsa-miR-1973 | NM_0013643 | MEF2C | 1 |
| hsa-miR-2277 | NM_0013643 | MEF2C | 1 |
| hsa-miR-2681 | NM_0013643 | MEF2C | 1 |
| hsa-miR-718  | NM_0013643 | MEF2C | 1 |
| hsa-miR-3125 | NM_0013643 | MEF2C | 1 |
| hsa-miR-3126 | NM_0013643 | MEF2C | 1 |
| hsa-miR-3127 | NM_0013643 | MEF2C | 1 |
| hsa-miR-3127 | NM_0013643 | MEF2C | 1 |
| hsa-miR-466  | NM_0013643 | MEF2C | 1 |
| hsa-miR-544b | NM_0013643 | MEF2C | 1 |
| hsa-miR-3139 | NM_0013643 | MEF2C | 1 |
| hsa-miR-314C | NM_0013643 | MEF2C | 1 |
| hsa-miR-3144 | NM_0013643 | MEF2C | 1 |
| hsa-miR-3145 | NM_0013643 | MEF2C | 1 |
| hsa-miR-3145 | NM_0013643 | MEF2C | 1 |
| hsa-miR-3149 | NM_0013643 | MEF2C | 1 |
| hsa-miR-3151 | NM_0013643 | MEF2C | 1 |
| hsa-miR-3151 | NM_0013643 | MEF2C | 1 |
| hsa-miR-3158 | NM_0013643 | MEF2C | 1 |
| hsa-miR-3158 | NM_0013643 | MEF2C | 1 |
| hsa-miR-3158 | NM_0013643 | MEF2C | 1 |
| hsa-miR-3162 | NM_0013643 | MEF2C | 1 |
| hsa-miR-3162 | NM_0013643 | MEF2C | 1 |
| hsa-miR-3169 | NM_0013643 | MEF2C | 1 |
| hsa-miR-317C | NM_0013643 | MEF2C | 1 |
| hsa-miR-3173 | NM_0013643 | MEF2C | 1 |
| hsa-miR-3173 | NM_0013643 | MEF2C | 1 |
| hsa-miR-3175 | NM_0013643 | MEF2C | 1 |
| hsa-miR-3175 | NM_0013643 | MEF2C | 1 |
| hsa-miR-3186 | NM_0013643 | MEF2C | 1 |
| hsa-miR-319C | NM_0013643 | MEF2C | 1 |
| hsa-miR-3194 | NM_0013643 | MEF2C | 1 |







|                                  |   |
|----------------------------------|---|
| hsa-miR-682C NM_0013643 MEF2C    | 1 |
| hsa-miR-6827 NM_0013643 MEF2C    | 1 |
| hsa-miR-6832 NM_0013643 MEF2C    | 1 |
| hsa-miR-678C NM_0013643 MEF2C    | 1 |
| hsa-miR-6837 NM_0013643 MEF2C    | 1 |
| hsa-miR-6845 NM_0013643 MEF2C    | 1 |
| hsa-miR-6846 NM_0013643 MEF2C    | 1 |
| hsa-miR-685C NM_0013643 MEF2C    | 1 |
| hsa-miR-6851 NM_0013643 MEF2C    | 1 |
| hsa-miR-6852 NM_0013643 MEF2C    | 1 |
| hsa-miR-6853 NM_0013643 MEF2C    | 1 |
| hsa-miR-6854 NM_0013643 MEF2C    | 1 |
| hsa-miR-6855 NM_0013643 MEF2C    | 1 |
| hsa-miR-6861 NM_0013643 MEF2C    | 1 |
| hsa-miR-6865 NM_0013643 MEF2C    | 1 |
| hsa-miR-6865 NM_0013643 MEF2C    | 1 |
| hsa-miR-6866 NM_0013643 MEF2C    | 1 |
| hsa-miR-6867 NM_0013643 MEF2C    | 1 |
| hsa-miR-6868 NM_0013643 MEF2C    | 1 |
| hsa-miR-6874 NM_0013643 MEF2C    | 1 |
| hsa-miR-6878 NM_0013643 MEF2C    | 1 |
| hsa-miR-6879 NM_0013643 MEF2C    | 1 |
| hsa-miR-6882 NM_0013643 MEF2C    | 1 |
| hsa-miR-6885 NM_0013643 MEF2C    | 1 |
| hsa-miR-6885 NM_0013643 MEF2C    | 1 |
| hsa-miR-6887 NM_0013643 MEF2C    | 1 |
| hsa-miR-6887 NM_0013643 MEF2C    | 1 |
| hsa-miR-6888 NM_0013643 MEF2C    | 1 |
| hsa-miR-6891 NM_0013643 MEF2C    | 1 |
| hsa-miR-6893 NM_0013643 MEF2C    | 1 |
| hsa-miR-7107 NM_0013643 MEF2C    | 1 |
| hsa-miR-7108 NM_0013643 MEF2C    | 1 |
| hsa-miR-7109 NM_0013643 MEF2C    | 1 |
| hsa-miR-711C NM_0013643 MEF2C    | 1 |
| hsa-miR-7111 NM_0013643 MEF2C    | 1 |
| hsa-miR-7112 NM_0013643 MEF2C    | 1 |
| hsa-miR-7114 NM_0013643 MEF2C    | 1 |
| hsa-miR-7151 NM_0013643 MEF2C    | 1 |
| hsa-miR-7154 NM_0013643 MEF2C    | 1 |
| hsa-miR-7157 NM_0013643 MEF2C    | 1 |
| hsa-miR-7162 NM_0013643 MEF2C    | 1 |
| hsa-miR-7162 NM_0013643 MEF2C    | 1 |
| hsa-miR-1273 NM_0013643 MEF2C    | 1 |
| hsa-miR-7848 NM_0013643 MEF2C    | 1 |
| hsa-miR-7849 NM_0013643 MEF2C    | 1 |
| hsa-miR-7853 NM_0013643 MEF2C    | 1 |
| hsa-miR-7855 NM_0013643 MEF2C    | 1 |
| hsa-miR-7975 NM_0013643 MEF2C    | 1 |
| hsa-miR-7978 NM_0013643 MEF2C    | 1 |
| hsa-miR-8057 NM_0013643 MEF2C    | 1 |
| hsa-miR-8058 NM_0013643 MEF2C    | 1 |
| hsa-miR-8058 NM_0013643 MEF2C    | 1 |
| hsa-miR-8059 NM_0013643 MEF2C    | 1 |
| hsa-miR-806C NM_0013643 MEF2C    | 1 |
| hsa-miR-8069 NM_0013643 MEF2C    | 1 |
| hsa-miR-8075 NM_0013643 MEF2C    | 1 |
| hsa-miR-8083 NM_0013643 MEF2C    | 1 |
| hsa-miR-8485 NM_0013643 MEF2C    | 1 |
| hsa-miR-1039 NM_0013643 MEF2C    | 1 |
| hsa-miR-104C NM_0013643 MEF2C    | 1 |
| hsa-miR-1118 NM_0013643 MEF2C    | 1 |
| hsa-miR-1139 NM_0013643 MEF2C    | 1 |
| hsa-miR-3059 NM_0013643 MEF2C    | 1 |
| hsa-miR-3059 NM_0013643 MEF2C    | 1 |
| hsa-miR-3085 NM_0013643 MEF2C    | 1 |
| hsa-miR-3085 NM_0013643 MEF2C    | 1 |
| hsa-miR-3085 NM_0013643 MEF2C    | 1 |
| hsa-miR-1211 NM_0013643 MEF2C    | 1 |
| hsa-miR-1211 NM_0013643 MEF2C    | 1 |
| hsa-miR-1212 NM_0013643 MEF2C    | 1 |
| hsa-miR-1213 NM_0013643 MEF2C    | 1 |
| hsa-let-7a-2-3 NM_0013643 MEF2C  | 1 |
| hsa-let-7a-2-3 NM_0013643 MEF2C  | 1 |
| hsa-let-7c-3p NM_0013643 MEF2C   | 1 |
| hsa-let-7e-3p NM_0013643 MEF2C   | 1 |
| hsa-let-7e-3p NM_0013643 MEF2C   | 1 |
| hsa-let-7f-1-3j NM_0013643 MEF2C | 1 |
| hsa-miR-15a- NM_0013643 MEF2C    | 1 |
| hsa-miR-17-5j NM_0013643 MEF2C   | 1 |
| hsa-miR-18a- NM_0013643 MEF2C    | 1 |
| hsa-miR-23a- NM_0013643 MEF2C    | 1 |
| hsa-miR-23a- NM_0013643 MEF2C    | 1 |
| hsa-miR-25-5j NM_0013643 MEF2C   | 1 |
| hsa-miR-29a- NM_0013643 MEF2C    | 1 |
| hsa-miR-92a- NM_0013643 MEF2C    | 1 |
| hsa-miR-96-5j NM_0013643 MEF2C   | 1 |
| hsa-miR-103a NM_0013643 MEF2C    | 1 |
| hsa-miR-103a NM_0013643 MEF2C    | 1 |
| hsa-miR-105- NM_0013643 MEF2C    | 1 |
| hsa-miR-106a NM_0013643 MEF2C    | 1 |
| hsa-miR-107 NM_0013643 MEF2C     | 1 |
| hsa-miR-129- NM_0013643 MEF2C    | 1 |
| hsa-miR-30d- NM_0013643 MEF2C    | 1 |

|               |            |       |   |
|---------------|------------|-------|---|
| hsa-miR-147a  | NM_0013643 | MEF2C | 1 |
| hsa-miR-147a  | NM_0013643 | MEF2C | 1 |
| hsa-miR-10b-  | NM_0013643 | MEF2C | 1 |
| hsa-miR-183-  | NM_0013643 | MEF2C | 1 |
| hsa-miR-204-  | NM_0013643 | MEF2C | 1 |
| hsa-miR-205-  | NM_0013643 | MEF2C | 1 |
| hsa-miR-210-  | NM_0013643 | MEF2C | 1 |
| hsa-miR-210-  | NM_0013643 | MEF2C | 1 |
| hsa-miR-210-  | NM_0013643 | MEF2C | 1 |
| hsa-miR-212-  | NM_0013643 | MEF2C | 1 |
| hsa-miR-214-  | NM_0013643 | MEF2C | 1 |
| hsa-miR-222-  | NM_0013643 | MEF2C | 1 |
| hsa-let-7i-3p | NM_0013643 | MEF2C | 1 |
| hsa-miR-23b-  | NM_0013643 | MEF2C | 1 |
| hsa-miR-124-  | NM_0013643 | MEF2C | 1 |
| hsa-miR-125b  | NM_0013643 | MEF2C | 1 |
| hsa-miR-135a  | NM_0013643 | MEF2C | 1 |
| hsa-miR-137-  | NM_0013643 | MEF2C | 1 |
| hsa-miR-137-  | NM_0013643 | MEF2C | 1 |
| hsa-miR-140-  | NM_0013643 | MEF2C | 1 |
| hsa-miR-142-  | NM_0013643 | MEF2C | 1 |
| hsa-miR-144-  | NM_0013643 | MEF2C | 1 |
| hsa-miR-145-  | NM_0013643 | MEF2C | 1 |
| hsa-miR-191-  | NM_0013643 | MEF2C | 1 |
| hsa-miR-191-  | NM_0013643 | MEF2C | 1 |
| hsa-miR-125a  | NM_0013643 | MEF2C | 1 |
| hsa-miR-126-  | NM_0013643 | MEF2C | 1 |
| hsa-miR-127-  | NM_0013643 | MEF2C | 1 |
| hsa-miR-127-  | NM_0013643 | MEF2C | 1 |
| hsa-miR-129-  | NM_0013643 | MEF2C | 1 |
| hsa-miR-154-  | NM_0013643 | MEF2C | 1 |
| hsa-miR-154-  | NM_0013643 | MEF2C | 1 |
| hsa-miR-185-  | NM_0013643 | MEF2C | 1 |
| hsa-miR-186-  | NM_0013643 | MEF2C | 1 |
| hsa-miR-188-  | NM_0013643 | MEF2C | 1 |
| hsa-miR-188-  | NM_0013643 | MEF2C | 1 |
| hsa-miR-206   | NM_0013643 | MEF2C | 1 |
| hsa-miR-200c  | NM_0013643 | MEF2C | 1 |
| hsa-miR-128-  | NM_0013643 | MEF2C | 1 |
| hsa-miR-296-  | NM_0013643 | MEF2C | 1 |
| hsa-miR-363-  | NM_0013643 | MEF2C | 1 |
| hsa-miR-302b  | NM_0013643 | MEF2C | 1 |
| hsa-miR-302d  | NM_0013643 | MEF2C | 1 |
| hsa-miR-370-  | NM_0013643 | MEF2C | 1 |
| hsa-miR-371a  | NM_0013643 | MEF2C | 1 |
| hsa-miR-372-  | NM_0013643 | MEF2C | 1 |
| hsa-miR-372-  | NM_0013643 | MEF2C | 1 |
| hsa-miR-376a  | NM_0013643 | MEF2C | 1 |
| hsa-miR-330-  | NM_0013643 | MEF2C | 1 |
| hsa-miR-328-  | NM_0013643 | MEF2C | 1 |
| hsa-miR-148b  | NM_0013643 | MEF2C | 1 |
| hsa-miR-331-  | NM_0013643 | MEF2C | 1 |
| hsa-miR-324-  | NM_0013643 | MEF2C | 1 |
| hsa-miR-325   | NM_0013643 | MEF2C | 1 |
| hsa-miR-18b-  | NM_0013643 | MEF2C | 1 |
| hsa-miR-20b-  | NM_0013643 | MEF2C | 1 |
| hsa-miR-329-  | NM_0013643 | MEF2C | 1 |
| hsa-miR-329-  | NM_0013643 | MEF2C | 1 |
| hsa-miR-409-  | NM_0013643 | MEF2C | 1 |
| hsa-miR-412-  | NM_0013643 | MEF2C | 1 |
| hsa-miR-483-  | NM_0013643 | MEF2C | 1 |
| hsa-miR-484   | NM_0013643 | MEF2C | 1 |
| hsa-miR-488-  | NM_0013643 | MEF2C | 1 |
| hsa-miR-490-  | NM_0013643 | MEF2C | 1 |
| hsa-miR-511-  | NM_0013643 | MEF2C | 1 |
| hsa-miR-202-  | NM_0013643 | MEF2C | 1 |
| hsa-miR-492   | NM_0013643 | MEF2C | 1 |
| hsa-miR-494-  | NM_0013643 | MEF2C | 1 |
| hsa-miR-193b  | NM_0013643 | MEF2C | 1 |
| hsa-miR-193b  | NM_0013643 | MEF2C | 1 |
| hsa-miR-520e  | NM_0013643 | MEF2C | 1 |
| hsa-miR-519e  | NM_0013643 | MEF2C | 1 |
| hsa-miR-520f  | NM_0013643 | MEF2C | 1 |
| hsa-miR-523-  | NM_0013643 | MEF2C | 1 |
| hsa-miR-526a  | NM_0013643 | MEF2C | 1 |
| hsa-miR-524-  | NM_0013643 | MEF2C | 1 |
| hsa-miR-519d  | NM_0013643 | MEF2C | 1 |
| hsa-miR-518a  | NM_0013643 | MEF2C | 1 |
| hsa-miR-518d  | NM_0013643 | MEF2C | 1 |
| hsa-miR-518d  | NM_0013643 | MEF2C | 1 |
| hsa-miR-520h  | NM_0013643 | MEF2C | 1 |
| hsa-miR-500a  | NM_0013643 | MEF2C | 1 |
| hsa-miR-501-  | NM_0013643 | MEF2C | 1 |
| hsa-miR-501-  | NM_0013643 | MEF2C | 1 |
| hsa-miR-502-  | NM_0013643 | MEF2C | 1 |
| hsa-miR-504-  | NM_0013643 | MEF2C | 1 |
| hsa-miR-514a  | NM_0013643 | MEF2C | 1 |
| hsa-miR-532-  | NM_0013643 | MEF2C | 1 |
| hsa-miR-455-  | NM_0013643 | MEF2C | 1 |
| hsa-miR-487b  | NM_0013643 | MEF2C | 1 |
| hsa-miR-487b  | NM_0013643 | MEF2C | 1 |
| hsa-miR-487b  | NM_0013643 | MEF2C | 1 |
| hsa-miR-487b  | NM_0013643 | MEF2C | 1 |
| hsa-miR-552-  | NM_0013643 | MEF2C | 1 |

|              |            |       |   |
|--------------|------------|-------|---|
| hsa-miR-551b | NM_0013643 | MEF2C | 1 |
| hsa-miR-574  | NM_0013643 | MEF2C | 1 |
| hsa-miR-584  | NM_0013643 | MEF2C | 1 |
| hsa-miR-585  | NM_0013643 | MEF2C | 1 |
| hsa-miR-550a | NM_0013643 | MEF2C | 1 |
| hsa-miR-592  | NM_0013643 | MEF2C | 1 |
| hsa-miR-603  | NM_0013643 | MEF2C | 1 |
| hsa-miR-615  | NM_0013643 | MEF2C | 1 |
| hsa-miR-615  | NM_0013643 | MEF2C | 1 |
| hsa-miR-616  | NM_0013643 | MEF2C | 1 |
| hsa-miR-618  | NM_0013643 | MEF2C | 1 |
| hsa-miR-619  | NM_0013643 | MEF2C | 1 |
| hsa-miR-33b  | NM_0013643 | MEF2C | 1 |
| hsa-miR-642a | NM_0013643 | MEF2C | 1 |
| hsa-miR-642a | NM_0013643 | MEF2C | 1 |
| hsa-miR-646  | NM_0013643 | MEF2C | 1 |
| hsa-miR-648  | NM_0013643 | MEF2C | 1 |
| hsa-miR-649  | NM_0013643 | MEF2C | 1 |
| hsa-miR-650  | NM_0013643 | MEF2C | 1 |
| hsa-miR-654  | NM_0013643 | MEF2C | 1 |
| hsa-miR-549a | NM_0013643 | MEF2C | 1 |
| hsa-miR-758  | NM_0013643 | MEF2C | 1 |
| hsa-miR-668  | NM_0013643 | MEF2C | 1 |
| hsa-miR-1224 | NM_0013643 | MEF2C | 1 |
| hsa-miR-320b | NM_0013643 | MEF2C | 1 |
| hsa-miR-320c | NM_0013643 | MEF2C | 1 |
| hsa-miR-1271 | NM_0013643 | MEF2C | 1 |
| hsa-miR-449c | NM_0013643 | MEF2C | 1 |
| hsa-miR-449c | NM_0013643 | MEF2C | 1 |
| hsa-miR-449c | NM_0013643 | MEF2C | 1 |
| hsa-miR-769  | NM_0013643 | MEF2C | 1 |
| hsa-miR-670  | NM_0013643 | MEF2C | 1 |
| hsa-miR-2113 | NM_0013643 | MEF2C | 1 |
| hsa-miR-764  | NM_0013643 | MEF2C | 1 |
| hsa-miR-765  | NM_0013643 | MEF2C | 1 |
| hsa-miR-891a | NM_0013643 | MEF2C | 1 |
| hsa-miR-891a | NM_0013643 | MEF2C | 1 |
| hsa-miR-874  | NM_0013643 | MEF2C | 1 |
| hsa-miR-888  | NM_0013643 | MEF2C | 1 |
| hsa-miR-892b | NM_0013643 | MEF2C | 1 |
| hsa-miR-892b | NM_0013643 | MEF2C | 1 |
| hsa-miR-887  | NM_0013643 | MEF2C | 1 |
| hsa-miR-873  | NM_0013643 | MEF2C | 1 |
| hsa-miR-760  | NM_0013643 | MEF2C | 1 |
| hsa-miR-760  | NM_0013643 | MEF2C | 1 |
| hsa-miR-509  | NM_0013643 | MEF2C | 1 |
| hsa-miR-933  | NM_0013643 | MEF2C | 1 |
| hsa-miR-935  | NM_0013643 | MEF2C | 1 |
| hsa-miR-936  | NM_0013643 | MEF2C | 1 |
| hsa-miR-939  | NM_0013643 | MEF2C | 1 |
| hsa-miR-939  | NM_0013643 | MEF2C | 1 |
| hsa-miR-940  | NM_0013643 | MEF2C | 1 |
| hsa-miR-1178 | NM_0013643 | MEF2C | 1 |
| hsa-miR-1180 | NM_0013643 | MEF2C | 1 |
| hsa-miR-1225 | NM_0013643 | MEF2C | 1 |
| hsa-miR-1227 | NM_0013643 | MEF2C | 1 |
| hsa-miR-1228 | NM_0013643 | MEF2C | 1 |
| hsa-miR-1229 | NM_0013643 | MEF2C | 1 |
| hsa-miR-1229 | NM_0013643 | MEF2C | 1 |
| hsa-miR-1233 | NM_0013643 | MEF2C | 1 |
| hsa-miR-1233 | NM_0013643 | MEF2C | 1 |
| hsa-miR-1233 | NM_0013643 | MEF2C | 1 |
| hsa-miR-1236 | NM_0013643 | MEF2C | 1 |
| hsa-miR-1237 | NM_0013643 | MEF2C | 1 |
| hsa-miR-1237 | NM_0013643 | MEF2C | 1 |
| hsa-miR-1204 | NM_0013643 | MEF2C | 1 |
| hsa-miR-1286 | NM_0013643 | MEF2C | 1 |
| hsa-miR-1287 | NM_0013643 | MEF2C | 1 |
| hsa-miR-1303 | NM_0013643 | MEF2C | 1 |
| hsa-miR-1244 | NM_0013643 | MEF2C | 1 |
| hsa-miR-1248 | NM_0013643 | MEF2C | 1 |
| hsa-miR-1249 | NM_0013643 | MEF2C | 1 |
| hsa-miR-1249 | NM_0013643 | MEF2C | 1 |
| hsa-miR-1251 | NM_0013643 | MEF2C | 1 |
| hsa-miR-1253 | NM_0013643 | MEF2C | 1 |
| hsa-miR-1263 | NM_0013643 | MEF2C | 1 |
| hsa-miR-1265 | NM_0013643 | MEF2C | 1 |
| hsa-miR-1266 | NM_0013643 | MEF2C | 1 |
| hsa-miR-1272 | NM_0013643 | MEF2C | 1 |
| hsa-miR-302e | NM_0013643 | MEF2C | 1 |
| hsa-miR-1281 | NM_0013643 | MEF2C | 1 |
| hsa-miR-1292 | NM_0013643 | MEF2C | 1 |
| hsa-miR-1292 | NM_0013643 | MEF2C | 1 |
| hsa-miR-1470 | NM_0013643 | MEF2C | 1 |
| hsa-miR-1538 | NM_0013643 | MEF2C | 1 |
| hsa-miR-1539 | NM_0013643 | MEF2C | 1 |
| hsa-miR-103b | NM_0013643 | MEF2C | 1 |
| hsa-miR-320d | NM_0013643 | MEF2C | 1 |
| hsa-miR-1908 | NM_0013643 | MEF2C | 1 |
| hsa-miR-1911 | NM_0013643 | MEF2C | 1 |
| hsa-miR-1914 | NM_0013643 | MEF2C | 1 |
| hsa-miR-1972 | NM_0013643 | MEF2C | 1 |
| hsa-miR-1973 | NM_0013643 | MEF2C | 1 |
| hsa-miR-1976 | NM_0013643 | MEF2C | 1 |











|                                  |   |
|----------------------------------|---|
| hsa-miR-8063 NM_0013643 MEF2C    | 1 |
| hsa-miR-8065 NM_0013643 MEF2C    | 1 |
| hsa-miR-8075 NM_0013643 MEF2C    | 1 |
| hsa-miR-8081 NM_0013643 MEF2C    | 1 |
| hsa-miR-8083 NM_0013643 MEF2C    | 1 |
| hsa-miR-8485 NM_0013643 MEF2C    | 1 |
| hsa-miR-1035 NM_0013643 MEF2C    | 1 |
| hsa-miR-1039 NM_0013643 MEF2C    | 1 |
| hsa-miR-1052 NM_0013643 MEF2C    | 1 |
| hsa-miR-1118 NM_0013643 MEF2C    | 1 |
| hsa-miR-1139 NM_0013643 MEF2C    | 1 |
| hsa-miR-3055 NM_0013643 MEF2C    | 1 |
| hsa-miR-3059 NM_0013643 MEF2C    | 1 |
| hsa-miR-3085 NM_0013643 MEF2C    | 1 |
| hsa-miR-1211 NM_0013643 MEF2C    | 1 |
| hsa-miR-1211 NM_0013643 MEF2C    | 1 |
| hsa-miR-1212 NM_0013643 MEF2C    | 1 |
| hsa-let-7a-2-3 NM_0013643 MEF2C  | 1 |
| hsa-let-7c-3p NM_0013643 MEF2C   | 1 |
| hsa-let-7e-3p NM_0013643 MEF2C   | 1 |
| hsa-let-7e-3p NM_0013643 MEF2C   | 1 |
| hsa-let-7f-1-3j NM_0013643 MEF2C | 1 |
| hsa-miR-25-5j NM_0013643 MEF2C   | 1 |
| hsa-miR-26b-1 NM_0013643 MEF2C   | 1 |
| hsa-miR-29a-1 NM_0013643 MEF2C   | 1 |
| hsa-miR-103a NM_0013643 MEF2C    | 1 |
| hsa-miR-105-1 NM_0013643 MEF2C   | 1 |
| hsa-miR-129-1 NM_0013643 MEF2C   | 1 |
| hsa-miR-30d-1 NM_0013643 MEF2C   | 1 |
| hsa-miR-183-1 NM_0013643 MEF2C   | 1 |
| hsa-miR-187-1 NM_0013643 MEF2C   | 1 |
| hsa-miR-205-1 NM_0013643 MEF2C   | 1 |
| hsa-miR-210-1 NM_0013643 MEF2C   | 1 |
| hsa-miR-210-1 NM_0013643 MEF2C   | 1 |
| hsa-miR-211-1 NM_0013643 MEF2C   | 1 |
| hsa-miR-218-1 NM_0013643 MEF2C   | 1 |
| hsa-miR-221-1 NM_0013643 MEF2C   | 1 |
| hsa-let-7g-3p NM_0013643 MEF2C   | 1 |
| hsa-let-7i-3p NM_0013643 MEF2C   | 1 |
| hsa-let-7i-3p NM_0013643 MEF2C   | 1 |
| hsa-miR-23b-1 NM_0013643 MEF2C   | 1 |
| hsa-miR-125b NM_0013643 MEF2C    | 1 |
| hsa-miR-137-1 NM_0013643 MEF2C   | 1 |
| hsa-miR-191-1 NM_0013643 MEF2C   | 1 |
| hsa-miR-125a NM_0013643 MEF2C    | 1 |
| hsa-miR-125a NM_0013643 MEF2C    | 1 |
| hsa-miR-127-1 NM_0013643 MEF2C   | 1 |
| hsa-miR-149-1 NM_0013643 MEF2C   | 1 |
| hsa-miR-149-1 NM_0013643 MEF2C   | 1 |
| hsa-miR-154-1 NM_0013643 MEF2C   | 1 |
| hsa-miR-154-1 NM_0013643 MEF2C   | 1 |
| hsa-miR-186-1 NM_0013643 MEF2C   | 1 |
| hsa-miR-188-1 NM_0013643 MEF2C   | 1 |
| hsa-miR-320a NM_0013643 MEF2C    | 1 |
| hsa-miR-128-1 NM_0013643 MEF2C   | 1 |
| hsa-miR-296-1 NM_0013643 MEF2C   | 1 |
| hsa-miR-362-1 NM_0013643 MEF2C   | 1 |
| hsa-miR-302b NM_0013643 MEF2C    | 1 |
| hsa-miR-370-1 NM_0013643 MEF2C   | 1 |
| hsa-miR-371a NM_0013643 MEF2C    | 1 |
| hsa-miR-372-1 NM_0013643 MEF2C   | 1 |
| hsa-miR-372-1 NM_0013643 MEF2C   | 1 |
| hsa-miR-376a NM_0013643 MEF2C    | 1 |
| hsa-miR-330-1 NM_0013643 MEF2C   | 1 |
| hsa-miR-328-1 NM_0013643 MEF2C   | 1 |
| hsa-miR-328-1 NM_0013643 MEF2C   | 1 |
| hsa-miR-148b NM_0013643 MEF2C    | 1 |
| hsa-miR-133b NM_0013643 MEF2C    | 1 |
| hsa-miR-325 NM_0013643 MEF2C     | 1 |
| hsa-miR-448 NM_0013643 MEF2C     | 1 |
| hsa-miR-329-1 NM_0013643 MEF2C   | 1 |
| hsa-miR-409-1 NM_0013643 MEF2C   | 1 |
| hsa-miR-483-1 NM_0013643 MEF2C   | 1 |
| hsa-miR-484 NM_0013643 MEF2C     | 1 |
| hsa-miR-489-1 NM_0013643 MEF2C   | 1 |
| hsa-miR-202-1 NM_0013643 MEF2C   | 1 |
| hsa-miR-492 NM_0013643 MEF2C     | 1 |
| hsa-miR-494-1 NM_0013643 MEF2C   | 1 |
| hsa-miR-193b NM_0013643 MEF2C    | 1 |
| hsa-miR-520e NM_0013643 MEF2C    | 1 |
| hsa-miR-515-1 NM_0013643 MEF2C   | 1 |
| hsa-miR-519e NM_0013643 MEF2C    | 1 |
| hsa-miR-523-1 NM_0013643 MEF2C   | 1 |
| hsa-miR-519d NM_0013643 MEF2C    | 1 |
| hsa-miR-520g NM_0013643 MEF2C    | 1 |
| hsa-miR-520g NM_0013643 MEF2C    | 1 |
| hsa-miR-518d NM_0013643 MEF2C    | 1 |
| hsa-miR-520h NM_0013643 MEF2C    | 1 |
| hsa-miR-520h NM_0013643 MEF2C    | 1 |
| hsa-miR-504-1 NM_0013643 MEF2C   | 1 |
| hsa-miR-509-1 NM_0013643 MEF2C   | 1 |
| hsa-miR-514a NM_0013643 MEF2C    | 1 |
| hsa-miR-532-1 NM_0013643 MEF2C   | 1 |
| hsa-miR-455-1 NM_0013643 MEF2C   | 1 |

|              |            |       |   |
|--------------|------------|-------|---|
| hsa-miR-487b | NM_0013643 | MEF2C | 1 |
| hsa-miR-487b | NM_0013643 | MEF2C | 1 |
| hsa-miR-487b | NM_0013643 | MEF2C | 1 |
| hsa-miR-551a | NM_0013643 | MEF2C | 1 |
| hsa-miR-552  | NM_0013643 | MEF2C | 1 |
| hsa-miR-552  | NM_0013643 | MEF2C | 1 |
| hsa-miR-554  | NM_0013643 | MEF2C | 1 |
| hsa-miR-556  | NM_0013643 | MEF2C | 1 |
| hsa-miR-574  | NM_0013643 | MEF2C | 1 |
| hsa-miR-584  | NM_0013643 | MEF2C | 1 |
| hsa-miR-585  | NM_0013643 | MEF2C | 1 |
| hsa-miR-588  | NM_0013643 | MEF2C | 1 |
| hsa-miR-550a | NM_0013643 | MEF2C | 1 |
| hsa-miR-603  | NM_0013643 | MEF2C | 1 |
| hsa-miR-615  | NM_0013643 | MEF2C | 1 |
| hsa-miR-618  | NM_0013643 | MEF2C | 1 |
| hsa-miR-625  | NM_0013643 | MEF2C | 1 |
| hsa-miR-33b  | NM_0013643 | MEF2C | 1 |
| hsa-miR-642a | NM_0013643 | MEF2C | 1 |
| hsa-miR-645  | NM_0013643 | MEF2C | 1 |
| hsa-miR-650  | NM_0013643 | MEF2C | 1 |
| hsa-miR-549a | NM_0013643 | MEF2C | 1 |
| hsa-miR-659  | NM_0013643 | MEF2C | 1 |
| hsa-miR-767  | NM_0013643 | MEF2C | 1 |
| hsa-miR-1224 | NM_0013643 | MEF2C | 1 |
| hsa-miR-1271 | NM_0013643 | MEF2C | 1 |
| hsa-miR-769  | NM_0013643 | MEF2C | 1 |
| hsa-miR-670  | NM_0013643 | MEF2C | 1 |
| hsa-miR-891a | NM_0013643 | MEF2C | 1 |
| hsa-miR-891a | NM_0013643 | MEF2C | 1 |
| hsa-miR-892a | NM_0013643 | MEF2C | 1 |
| hsa-miR-887  | NM_0013643 | MEF2C | 1 |
| hsa-miR-873  | NM_0013643 | MEF2C | 1 |
| hsa-miR-935  | NM_0013643 | MEF2C | 1 |
| hsa-miR-936  | NM_0013643 | MEF2C | 1 |
| hsa-miR-937  | NM_0013643 | MEF2C | 1 |
| hsa-miR-940  | NM_0013643 | MEF2C | 1 |
| hsa-miR-1180 | NM_0013643 | MEF2C | 1 |
| hsa-miR-1227 | NM_0013643 | MEF2C | 1 |
| hsa-miR-1225 | NM_0013643 | MEF2C | 1 |
| hsa-miR-1233 | NM_0013643 | MEF2C | 1 |
| hsa-miR-1234 | NM_0013643 | MEF2C | 1 |
| hsa-miR-1238 | NM_0013643 | MEF2C | 1 |
| hsa-miR-1286 | NM_0013643 | MEF2C | 1 |
| hsa-miR-1287 | NM_0013643 | MEF2C | 1 |
| hsa-miR-1303 | NM_0013643 | MEF2C | 1 |
| hsa-miR-1244 | NM_0013643 | MEF2C | 1 |
| hsa-miR-1247 | NM_0013643 | MEF2C | 1 |
| hsa-miR-1248 | NM_0013643 | MEF2C | 1 |
| hsa-miR-1253 | NM_0013643 | MEF2C | 1 |
| hsa-miR-1263 | NM_0013643 | MEF2C | 1 |
| hsa-miR-1265 | NM_0013643 | MEF2C | 1 |
| hsa-miR-1265 | NM_0013643 | MEF2C | 1 |
| hsa-miR-1266 | NM_0013643 | MEF2C | 1 |
| hsa-miR-1292 | NM_0013643 | MEF2C | 1 |
| hsa-miR-1292 | NM_0013643 | MEF2C | 1 |
| hsa-miR-1306 | NM_0013643 | MEF2C | 1 |
| hsa-miR-1470 | NM_0013643 | MEF2C | 1 |
| hsa-miR-103b | NM_0013643 | MEF2C | 1 |
| hsa-miR-1825 | NM_0013643 | MEF2C | 1 |
| hsa-miR-1908 | NM_0013643 | MEF2C | 1 |
| hsa-miR-1905 | NM_0013643 | MEF2C | 1 |
| hsa-miR-2116 | NM_0013643 | MEF2C | 1 |
| hsa-miR-2277 | NM_0013643 | MEF2C | 1 |
| hsa-miR-2681 | NM_0013643 | MEF2C | 1 |
| hsa-miR-718  | NM_0013643 | MEF2C | 1 |
| hsa-miR-3127 | NM_0013643 | MEF2C | 1 |
| hsa-miR-466  | NM_0013643 | MEF2C | 1 |
| hsa-miR-544b | NM_0013643 | MEF2C | 1 |
| hsa-miR-3140 | NM_0013643 | MEF2C | 1 |
| hsa-miR-3145 | NM_0013643 | MEF2C | 1 |
| hsa-miR-3145 | NM_0013643 | MEF2C | 1 |
| hsa-miR-3145 | NM_0013643 | MEF2C | 1 |
| hsa-miR-3151 | NM_0013643 | MEF2C | 1 |
| hsa-miR-3151 | NM_0013643 | MEF2C | 1 |
| hsa-miR-3158 | NM_0013643 | MEF2C | 1 |
| hsa-miR-3158 | NM_0013643 | MEF2C | 1 |
| hsa-miR-3162 | NM_0013643 | MEF2C | 1 |
| hsa-miR-3165 | NM_0013643 | MEF2C | 1 |
| hsa-miR-3170 | NM_0013643 | MEF2C | 1 |
| hsa-miR-3175 | NM_0013643 | MEF2C | 1 |
| hsa-miR-3176 | NM_0013643 | MEF2C | 1 |
| hsa-miR-3186 | NM_0013643 | MEF2C | 1 |
| hsa-miR-3190 | NM_0013643 | MEF2C | 1 |
| hsa-miR-3194 | NM_0013643 | MEF2C | 1 |
| hsa-miR-4297 | NM_0013643 | MEF2C | 1 |
| hsa-miR-4312 | NM_0013643 | MEF2C | 1 |
| hsa-miR-4313 | NM_0013643 | MEF2C | 1 |
| hsa-miR-4323 | NM_0013643 | MEF2C | 1 |
| hsa-miR-4257 | NM_0013643 | MEF2C | 1 |
| hsa-miR-4255 | NM_0013643 | MEF2C | 1 |
| hsa-miR-4255 | NM_0013643 | MEF2C | 1 |
| hsa-miR-4260 | NM_0013643 | MEF2C | 1 |
| hsa-miR-4261 | NM_0013643 | MEF2C | 1 |





|                                  |   |
|----------------------------------|---|
| hsa-miR-6867 NM_0013643 MEF2C    | 1 |
| hsa-miR-6867 NM_0013643 MEF2C    | 1 |
| hsa-miR-6868 NM_0013643 MEF2C    | 1 |
| hsa-miR-687C NM_0013643 MEF2C    | 1 |
| hsa-miR-6874 NM_0013643 MEF2C    | 1 |
| hsa-miR-6878 NM_0013643 MEF2C    | 1 |
| hsa-miR-6879 NM_0013643 MEF2C    | 1 |
| hsa-miR-6882 NM_0013643 MEF2C    | 1 |
| hsa-miR-6882 NM_0013643 MEF2C    | 1 |
| hsa-miR-6882 NM_0013643 MEF2C    | 1 |
| hsa-miR-6885 NM_0013643 MEF2C    | 1 |
| hsa-miR-6885 NM_0013643 MEF2C    | 1 |
| hsa-miR-6886 NM_0013643 MEF2C    | 1 |
| hsa-miR-6887 NM_0013643 MEF2C    | 1 |
| hsa-miR-6887 NM_0013643 MEF2C    | 1 |
| hsa-miR-6887 NM_0013643 MEF2C    | 1 |
| hsa-miR-6888 NM_0013643 MEF2C    | 1 |
| hsa-miR-6888 NM_0013643 MEF2C    | 1 |
| hsa-miR-6891 NM_0013643 MEF2C    | 1 |
| hsa-miR-6893 NM_0013643 MEF2C    | 1 |
| hsa-miR-7109 NM_0013643 MEF2C    | 1 |
| hsa-miR-711C NM_0013643 MEF2C    | 1 |
| hsa-miR-7111 NM_0013643 MEF2C    | 1 |
| hsa-miR-7113 NM_0013643 MEF2C    | 1 |
| hsa-miR-7151 NM_0013643 MEF2C    | 1 |
| hsa-miR-7154 NM_0013643 MEF2C    | 1 |
| hsa-miR-7154 NM_0013643 MEF2C    | 1 |
| hsa-miR-7157 NM_0013643 MEF2C    | 1 |
| hsa-miR-7162 NM_0013643 MEF2C    | 1 |
| hsa-miR-7162 NM_0013643 MEF2C    | 1 |
| hsa-miR-7704 NM_0013643 MEF2C    | 1 |
| hsa-miR-1273 NM_0013643 MEF2C    | 1 |
| hsa-miR-7844 NM_0013643 MEF2C    | 1 |
| hsa-miR-7848 NM_0013643 MEF2C    | 1 |
| hsa-miR-7854 NM_0013643 MEF2C    | 1 |
| hsa-miR-7855 NM_0013643 MEF2C    | 1 |
| hsa-miR-7975 NM_0013643 MEF2C    | 1 |
| hsa-miR-7978 NM_0013643 MEF2C    | 1 |
| hsa-miR-8058 NM_0013643 MEF2C    | 1 |
| hsa-miR-8058 NM_0013643 MEF2C    | 1 |
| hsa-miR-8059 NM_0013643 MEF2C    | 1 |
| hsa-miR-8059 NM_0013643 MEF2C    | 1 |
| hsa-miR-806C NM_0013643 MEF2C    | 1 |
| hsa-miR-8069 NM_0013643 MEF2C    | 1 |
| hsa-miR-807C NM_0013643 MEF2C    | 1 |
| hsa-miR-8083 NM_0013643 MEF2C    | 1 |
| hsa-miR-1039 NM_0013643 MEF2C    | 1 |
| hsa-miR-1039 NM_0013643 MEF2C    | 1 |
| hsa-miR-104C NM_0013643 MEF2C    | 1 |
| hsa-miR-1118 NM_0013643 MEF2C    | 1 |
| hsa-miR-1139 NM_0013643 MEF2C    | 1 |
| hsa-miR-3059 NM_0013643 MEF2C    | 1 |
| hsa-miR-3059 NM_0013643 MEF2C    | 1 |
| hsa-miR-3085 NM_0013643 MEF2C    | 1 |
| hsa-miR-3085 NM_0013643 MEF2C    | 1 |
| hsa-miR-1211 NM_0013643 MEF2C    | 1 |
| hsa-miR-1212 NM_0013643 MEF2C    | 1 |
| hsa-let-7a-2-3 NM_0013643 MEF2C  | 1 |
| hsa-let-7a-2-3 NM_0013643 MEF2C  | 1 |
| hsa-let-7c-3p NM_0013643 MEF2C   | 1 |
| hsa-let-7e-3p NM_0013643 MEF2C   | 1 |
| hsa-let-7f-1-3j NM_0013643 MEF2C | 1 |
| hsa-miR-18a- NM_0013643 MEF2C    | 1 |
| hsa-miR-22-5j NM_0013643 MEF2C   | 1 |
| hsa-miR-23a- NM_0013643 MEF2C    | 1 |
| hsa-miR-26b- NM_0013643 MEF2C    | 1 |
| hsa-miR-27a- NM_0013643 MEF2C    | 1 |
| hsa-miR-29a- NM_0013643 MEF2C    | 1 |
| hsa-miR-33a- NM_0013643 MEF2C    | 1 |
| hsa-miR-105- NM_0013643 MEF2C    | 1 |
| hsa-miR-129- NM_0013643 MEF2C    | 1 |
| hsa-miR-30d- NM_0013643 MEF2C    | 1 |
| hsa-miR-183- NM_0013643 MEF2C    | 1 |
| hsa-miR-205- NM_0013643 MEF2C    | 1 |
| hsa-miR-211- NM_0013643 MEF2C    | 1 |
| hsa-miR-211- NM_0013643 MEF2C    | 1 |
| hsa-miR-214- NM_0013643 MEF2C    | 1 |
| hsa-miR-218- NM_0013643 MEF2C    | 1 |
| hsa-miR-221- NM_0013643 MEF2C    | 1 |
| hsa-miR-221- NM_0013643 MEF2C    | 1 |
| hsa-let-7g-3p NM_0013643 MEF2C   | 1 |
| hsa-let-7i-3p NM_0013643 MEF2C   | 1 |
| hsa-let-7i-3p NM_0013643 MEF2C   | 1 |
| hsa-miR-125b NM_0013643 MEF2C    | 1 |
| hsa-miR-132- NM_0013643 MEF2C    | 1 |
| hsa-miR-137- NM_0013643 MEF2C    | 1 |
| hsa-miR-144- NM_0013643 MEF2C    | 1 |
| hsa-miR-191- NM_0013643 MEF2C    | 1 |
| hsa-miR-125a NM_0013643 MEF2C    | 1 |
| hsa-miR-129- NM_0013643 MEF2C    | 1 |
| hsa-miR-149- NM_0013643 MEF2C    | 1 |
| hsa-miR-154- NM_0013643 MEF2C    | 1 |
| hsa-miR-154- NM_0013643 MEF2C    | 1 |
| hsa-miR-186- NM_0013643 MEF2C    | 1 |
| hsa-miR-188- NM_0013643 MEF2C    | 1 |

|              |            |       |   |
|--------------|------------|-------|---|
| hsa-miR-195- | NM_0013643 | MEF2C | 1 |
| hsa-miR-320a | NM_0013643 | MEF2C | 1 |
| hsa-miR-296- | NM_0013643 | MEF2C | 1 |
| hsa-miR-362- | NM_0013643 | MEF2C | 1 |
| hsa-miR-302b | NM_0013643 | MEF2C | 1 |
| hsa-miR-302b | NM_0013643 | MEF2C | 1 |
| hsa-miR-370- | NM_0013643 | MEF2C | 1 |
| hsa-miR-371a | NM_0013643 | MEF2C | 1 |
| hsa-miR-372- | NM_0013643 | MEF2C | 1 |
| hsa-miR-376a | NM_0013643 | MEF2C | 1 |
| hsa-miR-383- | NM_0013643 | MEF2C | 1 |
| hsa-miR-328- | NM_0013643 | MEF2C | 1 |
| hsa-miR-342- | NM_0013643 | MEF2C | 1 |
| hsa-miR-148b | NM_0013643 | MEF2C | 1 |
| hsa-miR-324- | NM_0013643 | MEF2C | 1 |
| hsa-miR-133b | NM_0013643 | MEF2C | 1 |
| hsa-miR-18b- | NM_0013643 | MEF2C | 1 |
| hsa-miR-448  | NM_0013643 | MEF2C | 1 |
| hsa-miR-329- | NM_0013643 | MEF2C | 1 |
| hsa-miR-329- | NM_0013643 | MEF2C | 1 |
| hsa-miR-483- | NM_0013643 | MEF2C | 1 |
| hsa-miR-484  | NM_0013643 | MEF2C | 1 |
| hsa-miR-489- | NM_0013643 | MEF2C | 1 |
| hsa-miR-202- | NM_0013643 | MEF2C | 1 |
| hsa-miR-493- | NM_0013643 | MEF2C | 1 |
| hsa-miR-494- | NM_0013643 | MEF2C | 1 |
| hsa-miR-193b | NM_0013643 | MEF2C | 1 |
| hsa-miR-193b | NM_0013643 | MEF2C | 1 |
| hsa-miR-497- | NM_0013643 | MEF2C | 1 |
| hsa-miR-520e | NM_0013643 | MEF2C | 1 |
| hsa-miR-519e | NM_0013643 | MEF2C | 1 |
| hsa-miR-519e | NM_0013643 | MEF2C | 1 |
| hsa-miR-519d | NM_0013643 | MEF2C | 1 |
| hsa-miR-520g | NM_0013643 | MEF2C | 1 |
| hsa-miR-518a | NM_0013643 | MEF2C | 1 |
| hsa-miR-520h | NM_0013643 | MEF2C | 1 |
| hsa-miR-519a | NM_0013643 | MEF2C | 1 |
| hsa-miR-504- | NM_0013643 | MEF2C | 1 |
| hsa-miR-509- | NM_0013643 | MEF2C | 1 |
| hsa-miR-514a | NM_0013643 | MEF2C | 1 |
| hsa-miR-487b | NM_0013643 | MEF2C | 1 |
| hsa-miR-552- | NM_0013643 | MEF2C | 1 |
| hsa-miR-554  | NM_0013643 | MEF2C | 1 |
| hsa-miR-585- | NM_0013643 | MEF2C | 1 |
| hsa-miR-588  | NM_0013643 | MEF2C | 1 |
| hsa-miR-550a | NM_0013643 | MEF2C | 1 |
| hsa-miR-592  | NM_0013643 | MEF2C | 1 |
| hsa-miR-603  | NM_0013643 | MEF2C | 1 |
| hsa-miR-615- | NM_0013643 | MEF2C | 1 |
| hsa-miR-619- | NM_0013643 | MEF2C | 1 |
| hsa-miR-625- | NM_0013643 | MEF2C | 1 |
| hsa-miR-627- | NM_0013643 | MEF2C | 1 |
| hsa-miR-638  | NM_0013643 | MEF2C | 1 |
| hsa-miR-642a | NM_0013643 | MEF2C | 1 |
| hsa-miR-652- | NM_0013643 | MEF2C | 1 |
| hsa-miR-652- | NM_0013643 | MEF2C | 1 |
| hsa-miR-654- | NM_0013643 | MEF2C | 1 |
| hsa-miR-549a | NM_0013643 | MEF2C | 1 |
| hsa-miR-659- | NM_0013643 | MEF2C | 1 |
| hsa-miR-767- | NM_0013643 | MEF2C | 1 |
| hsa-miR-1224 | NM_0013643 | MEF2C | 1 |
| hsa-miR-320b | NM_0013643 | MEF2C | 1 |
| hsa-miR-1301 | NM_0013643 | MEF2C | 1 |
| hsa-miR-1283 | NM_0013643 | MEF2C | 1 |
| hsa-miR-769- | NM_0013643 | MEF2C | 1 |
| hsa-miR-670- | NM_0013643 | MEF2C | 1 |
| hsa-miR-2113 | NM_0013643 | MEF2C | 1 |
| hsa-miR-764  | NM_0013643 | MEF2C | 1 |
| hsa-miR-675- | NM_0013643 | MEF2C | 1 |
| hsa-miR-675- | NM_0013643 | MEF2C | 1 |
| hsa-miR-891a | NM_0013643 | MEF2C | 1 |
| hsa-miR-892b | NM_0013643 | MEF2C | 1 |
| hsa-miR-892b | NM_0013643 | MEF2C | 1 |
| hsa-miR-708- | NM_0013643 | MEF2C | 1 |
| hsa-miR-887- | NM_0013643 | MEF2C | 1 |
| hsa-miR-509- | NM_0013643 | MEF2C | 1 |
| hsa-miR-933  | NM_0013643 | MEF2C | 1 |
| hsa-miR-935  | NM_0013643 | MEF2C | 1 |
| hsa-miR-940  | NM_0013643 | MEF2C | 1 |
| hsa-miR-1178 | NM_0013643 | MEF2C | 1 |
| hsa-miR-1180 | NM_0013643 | MEF2C | 1 |
| hsa-miR-1227 | NM_0013643 | MEF2C | 1 |
| hsa-miR-1228 | NM_0013643 | MEF2C | 1 |
| hsa-miR-1233 | NM_0013643 | MEF2C | 1 |
| hsa-miR-1233 | NM_0013643 | MEF2C | 1 |
| hsa-miR-1234 | NM_0013643 | MEF2C | 1 |
| hsa-miR-1204 | NM_0013643 | MEF2C | 1 |
| hsa-miR-1286 | NM_0013643 | MEF2C | 1 |
| hsa-miR-1287 | NM_0013643 | MEF2C | 1 |
| hsa-miR-1287 | NM_0013643 | MEF2C | 1 |
| hsa-miR-1303 | NM_0013643 | MEF2C | 1 |
| hsa-miR-1247 | NM_0013643 | MEF2C | 1 |
| hsa-miR-1253 | NM_0013643 | MEF2C | 1 |
| hsa-miR-1292 | NM_0013643 | MEF2C | 1 |

|                               |   |
|-------------------------------|---|
| hsa-miR-1292 NM_0013643 MEF2C | 1 |
| hsa-miR-1470 NM_0013643 MEF2C | 1 |
| hsa-miR-103b NM_0013643 MEF2C | 1 |
| hsa-miR-1825 NM_0013643 MEF2C | 1 |
| hsa-miR-1908 NM_0013643 MEF2C | 1 |
| hsa-miR-1911 NM_0013643 MEF2C | 1 |
| hsa-miR-1912 NM_0013643 MEF2C | 1 |
| hsa-miR-2116 NM_0013643 MEF2C | 1 |
| hsa-miR-2276 NM_0013643 MEF2C | 1 |
| hsa-miR-2277 NM_0013643 MEF2C | 1 |
| hsa-miR-718 NM_0013643 MEF2C  | 1 |
| hsa-miR-3121 NM_0013643 MEF2C | 1 |
| hsa-miR-3127 NM_0013643 MEF2C | 1 |
| hsa-miR-3127 NM_0013643 MEF2C | 1 |
| hsa-miR-466 NM_0013643 MEF2C  | 1 |
| hsa-miR-544b NM_0013643 MEF2C | 1 |
| hsa-miR-3140 NM_0013643 MEF2C | 1 |
| hsa-miR-3144 NM_0013643 MEF2C | 1 |
| hsa-miR-3145 NM_0013643 MEF2C | 1 |
| hsa-miR-3149 NM_0013643 MEF2C | 1 |
| hsa-miR-3151 NM_0013643 MEF2C | 1 |
| hsa-miR-3158 NM_0013643 MEF2C | 1 |
| hsa-miR-3158 NM_0013643 MEF2C | 1 |
| hsa-miR-3162 NM_0013643 MEF2C | 1 |
| hsa-miR-3162 NM_0013643 MEF2C | 1 |
| hsa-miR-3169 NM_0013643 MEF2C | 1 |
| hsa-miR-3170 NM_0013643 MEF2C | 1 |
| hsa-miR-3173 NM_0013643 MEF2C | 1 |
| hsa-miR-3174 NM_0013643 MEF2C | 1 |
| hsa-miR-3175 NM_0013643 MEF2C | 1 |
| hsa-miR-3186 NM_0013643 MEF2C | 1 |
| hsa-miR-3186 NM_0013643 MEF2C | 1 |
| hsa-miR-3186 NM_0013643 MEF2C | 1 |
| hsa-miR-3190 NM_0013643 MEF2C | 1 |
| hsa-miR-3194 NM_0013643 MEF2C | 1 |
| hsa-miR-4297 NM_0013643 MEF2C | 1 |
| hsa-miR-4312 NM_0013643 MEF2C | 1 |
| hsa-miR-4313 NM_0013643 MEF2C | 1 |
| hsa-miR-4259 NM_0013643 MEF2C | 1 |
| hsa-miR-4260 NM_0013643 MEF2C | 1 |
| hsa-miR-4279 NM_0013643 MEF2C | 1 |
| hsa-miR-4289 NM_0013643 MEF2C | 1 |
| hsa-miR-4290 NM_0013643 MEF2C | 1 |
| hsa-miR-3610 NM_0013643 MEF2C | 1 |
| hsa-miR-3619 NM_0013643 MEF2C | 1 |
| hsa-miR-23c NM_0013643 MEF2C  | 1 |
| hsa-miR-3622 NM_0013643 MEF2C | 1 |
| hsa-miR-3649 NM_0013643 MEF2C | 1 |
| hsa-miR-3650 NM_0013643 MEF2C | 1 |
| hsa-miR-3667 NM_0013643 MEF2C | 1 |
| hsa-miR-3682 NM_0013643 MEF2C | 1 |
| hsa-miR-3685 NM_0013643 MEF2C | 1 |
| hsa-miR-3688 NM_0013643 MEF2C | 1 |
| hsa-miR-3688 NM_0013643 MEF2C | 1 |
| hsa-miR-3690 NM_0013643 MEF2C | 1 |
| hsa-miR-3690 NM_0013643 MEF2C | 1 |
| hsa-miR-3908 NM_0013643 MEF2C | 1 |
| hsa-miR-3909 NM_0013643 MEF2C | 1 |
| hsa-miR-3921 NM_0013643 MEF2C | 1 |
| hsa-miR-3936 NM_0013643 MEF2C | 1 |
| hsa-miR-3938 NM_0013643 MEF2C | 1 |
| hsa-miR-3940 NM_0013643 MEF2C | 1 |
| hsa-miR-3943 NM_0013643 MEF2C | 1 |
| hsa-miR-3944 NM_0013643 MEF2C | 1 |
| hsa-miR-642b NM_0013643 MEF2C | 1 |
| hsa-miR-550b NM_0013643 MEF2C | 1 |
| hsa-miR-4418 NM_0013643 MEF2C | 1 |
| hsa-miR-4425 NM_0013643 MEF2C | 1 |
| hsa-miR-4432 NM_0013643 MEF2C | 1 |
| hsa-miR-4446 NM_0013643 MEF2C | 1 |
| hsa-miR-4446 NM_0013643 MEF2C | 1 |
| hsa-miR-548a NM_0013643 MEF2C | 1 |
| hsa-miR-4454 NM_0013643 MEF2C | 1 |
| hsa-miR-4467 NM_0013643 MEF2C | 1 |
| hsa-miR-4486 NM_0013643 MEF2C | 1 |
| hsa-miR-4489 NM_0013643 MEF2C | 1 |
| hsa-miR-2392 NM_0013643 MEF2C | 1 |
| hsa-miR-4510 NM_0013643 MEF2C | 1 |
| hsa-miR-4524 NM_0013643 MEF2C | 1 |
| hsa-miR-4524 NM_0013643 MEF2C | 1 |
| hsa-miR-4536 NM_0013643 MEF2C | 1 |
| hsa-miR-3973 NM_0013643 MEF2C | 1 |
| hsa-miR-3978 NM_0013643 MEF2C | 1 |
| hsa-miR-4633 NM_0013643 MEF2C | 1 |
| hsa-miR-4642 NM_0013643 MEF2C | 1 |
| hsa-miR-4642 NM_0013643 MEF2C | 1 |
| hsa-miR-4646 NM_0013643 MEF2C | 1 |
| hsa-miR-4646 NM_0013643 MEF2C | 1 |
| hsa-miR-4649 NM_0013643 MEF2C | 1 |
| hsa-miR-4655 NM_0013643 MEF2C | 1 |
| hsa-miR-4664 NM_0013643 MEF2C | 1 |
| hsa-miR-4667 NM_0013643 MEF2C | 1 |
| hsa-miR-4676 NM_0013643 MEF2C | 1 |
| hsa-miR-4681 NM_0013643 MEF2C | 1 |
| hsa-miR-4685 NM_0013643 MEF2C | 1 |







|               |            |       |   |
|---------------|------------|-------|---|
| hsa-miR-105-  | NM_0013643 | MEF2C | 1 |
| hsa-miR-129-  | NM_0013643 | MEF2C | 1 |
| hsa-miR-30d-  | NM_0013643 | MEF2C | 1 |
| hsa-miR-183-  | NM_0013643 | MEF2C | 1 |
| hsa-miR-205-  | NM_0013643 | MEF2C | 1 |
| hsa-miR-210-  | NM_0013643 | MEF2C | 1 |
| hsa-miR-211-  | NM_0013643 | MEF2C | 1 |
| hsa-miR-211-  | NM_0013643 | MEF2C | 1 |
| hsa-miR-214-  | NM_0013643 | MEF2C | 1 |
| hsa-miR-218-  | NM_0013643 | MEF2C | 1 |
| hsa-miR-221-  | NM_0013643 | MEF2C | 1 |
| hsa-miR-221-  | NM_0013643 | MEF2C | 1 |
| hsa-let-7g-3p | NM_0013643 | MEF2C | 1 |
| hsa-let-7i-3p | NM_0013643 | MEF2C | 1 |
| hsa-let-7i-3p | NM_0013643 | MEF2C | 1 |
| hsa-miR-125b  | NM_0013643 | MEF2C | 1 |
| hsa-miR-137-  | NM_0013643 | MEF2C | 1 |
| hsa-miR-144-  | NM_0013643 | MEF2C | 1 |
| hsa-miR-191-  | NM_0013643 | MEF2C | 1 |
| hsa-miR-125a  | NM_0013643 | MEF2C | 1 |
| hsa-miR-129-  | NM_0013643 | MEF2C | 1 |
| hsa-miR-149-  | NM_0013643 | MEF2C | 1 |
| hsa-miR-154-  | NM_0013643 | MEF2C | 1 |
| hsa-miR-154-  | NM_0013643 | MEF2C | 1 |
| hsa-miR-186-  | NM_0013643 | MEF2C | 1 |
| hsa-miR-188-  | NM_0013643 | MEF2C | 1 |
| hsa-miR-320a  | NM_0013643 | MEF2C | 1 |
| hsa-miR-296-  | NM_0013643 | MEF2C | 1 |
| hsa-miR-362-  | NM_0013643 | MEF2C | 1 |
| hsa-miR-302b  | NM_0013643 | MEF2C | 1 |
| hsa-miR-302b  | NM_0013643 | MEF2C | 1 |
| hsa-miR-302c  | NM_0013643 | MEF2C | 1 |
| hsa-miR-370-  | NM_0013643 | MEF2C | 1 |
| hsa-miR-371a  | NM_0013643 | MEF2C | 1 |
| hsa-miR-372-  | NM_0013643 | MEF2C | 1 |
| hsa-miR-376a  | NM_0013643 | MEF2C | 1 |
| hsa-miR-330-  | NM_0013643 | MEF2C | 1 |
| hsa-miR-328-  | NM_0013643 | MEF2C | 1 |
| hsa-miR-342-  | NM_0013643 | MEF2C | 1 |
| hsa-miR-148b  | NM_0013643 | MEF2C | 1 |
| hsa-miR-324-  | NM_0013643 | MEF2C | 1 |
| hsa-miR-133b  | NM_0013643 | MEF2C | 1 |
| hsa-miR-18b-  | NM_0013643 | MEF2C | 1 |
| hsa-miR-448   | NM_0013643 | MEF2C | 1 |
| hsa-miR-329-  | NM_0013643 | MEF2C | 1 |
| hsa-miR-329-  | NM_0013643 | MEF2C | 1 |
| hsa-miR-489-  | NM_0013643 | MEF2C | 1 |
| hsa-miR-202-  | NM_0013643 | MEF2C | 1 |
| hsa-miR-492   | NM_0013643 | MEF2C | 1 |
| hsa-miR-432-  | NM_0013643 | MEF2C | 1 |
| hsa-miR-494-  | NM_0013643 | MEF2C | 1 |
| hsa-miR-193b  | NM_0013643 | MEF2C | 1 |
| hsa-miR-193b  | NM_0013643 | MEF2C | 1 |
| hsa-miR-497-  | NM_0013643 | MEF2C | 1 |
| hsa-miR-520e  | NM_0013643 | MEF2C | 1 |
| hsa-miR-519e  | NM_0013643 | MEF2C | 1 |
| hsa-miR-519e  | NM_0013643 | MEF2C | 1 |
| hsa-miR-519d  | NM_0013643 | MEF2C | 1 |
| hsa-miR-520g  | NM_0013643 | MEF2C | 1 |
| hsa-miR-518a  | NM_0013643 | MEF2C | 1 |
| hsa-miR-520h  | NM_0013643 | MEF2C | 1 |
| hsa-miR-519a  | NM_0013643 | MEF2C | 1 |
| hsa-miR-504-  | NM_0013643 | MEF2C | 1 |
| hsa-miR-509-  | NM_0013643 | MEF2C | 1 |
| hsa-miR-514a  | NM_0013643 | MEF2C | 1 |
| hsa-miR-487b  | NM_0013643 | MEF2C | 1 |
| hsa-miR-552-  | NM_0013643 | MEF2C | 1 |
| hsa-miR-554   | NM_0013643 | MEF2C | 1 |
| hsa-miR-585-  | NM_0013643 | MEF2C | 1 |
| hsa-miR-588   | NM_0013643 | MEF2C | 1 |
| hsa-miR-550a  | NM_0013643 | MEF2C | 1 |
| hsa-miR-592   | NM_0013643 | MEF2C | 1 |
| hsa-miR-603   | NM_0013643 | MEF2C | 1 |
| hsa-miR-615-  | NM_0013643 | MEF2C | 1 |
| hsa-miR-619-  | NM_0013643 | MEF2C | 1 |
| hsa-miR-625-  | NM_0013643 | MEF2C | 1 |
| hsa-miR-627-  | NM_0013643 | MEF2C | 1 |
| hsa-miR-638   | NM_0013643 | MEF2C | 1 |
| hsa-miR-642a  | NM_0013643 | MEF2C | 1 |
| hsa-miR-652-  | NM_0013643 | MEF2C | 1 |
| hsa-miR-652-  | NM_0013643 | MEF2C | 1 |
| hsa-miR-654-  | NM_0013643 | MEF2C | 1 |
| hsa-miR-549a  | NM_0013643 | MEF2C | 1 |
| hsa-miR-659-  | NM_0013643 | MEF2C | 1 |
| hsa-miR-659-  | NM_0013643 | MEF2C | 1 |
| hsa-miR-767-  | NM_0013643 | MEF2C | 1 |
| hsa-miR-1224  | NM_0013643 | MEF2C | 1 |
| hsa-miR-320b  | NM_0013643 | MEF2C | 1 |
| hsa-miR-1301  | NM_0013643 | MEF2C | 1 |
| hsa-miR-1283  | NM_0013643 | MEF2C | 1 |
| hsa-miR-769-  | NM_0013643 | MEF2C | 1 |
| hsa-miR-766-  | NM_0013643 | MEF2C | 1 |
| hsa-miR-670-  | NM_0013643 | MEF2C | 1 |
| hsa-miR-2113  | NM_0013643 | MEF2C | 1 |

|              |            |       |   |
|--------------|------------|-------|---|
| hsa-miR-764  | NM_0013643 | MEF2C | 1 |
| hsa-miR-675- | NM_0013643 | MEF2C | 1 |
| hsa-miR-675- | NM_0013643 | MEF2C | 1 |
| hsa-miR-891a | NM_0013643 | MEF2C | 1 |
| hsa-miR-892b | NM_0013643 | MEF2C | 1 |
| hsa-miR-708- | NM_0013643 | MEF2C | 1 |
| hsa-miR-887- | NM_0013643 | MEF2C | 1 |
| hsa-miR-509- | NM_0013643 | MEF2C | 1 |
| hsa-miR-933  | NM_0013643 | MEF2C | 1 |
| hsa-miR-935  | NM_0013643 | MEF2C | 1 |
| hsa-miR-940  | NM_0013643 | MEF2C | 1 |
| hsa-miR-118C | NM_0013643 | MEF2C | 1 |
| hsa-miR-1227 | NM_0013643 | MEF2C | 1 |
| hsa-miR-1229 | NM_0013643 | MEF2C | 1 |
| hsa-miR-1233 | NM_0013643 | MEF2C | 1 |
| hsa-miR-1234 | NM_0013643 | MEF2C | 1 |
| hsa-miR-1204 | NM_0013643 | MEF2C | 1 |
| hsa-miR-1286 | NM_0013643 | MEF2C | 1 |
| hsa-miR-1287 | NM_0013643 | MEF2C | 1 |
| hsa-miR-1303 | NM_0013643 | MEF2C | 1 |
| hsa-miR-1247 | NM_0013643 | MEF2C | 1 |
| hsa-miR-1251 | NM_0013643 | MEF2C | 1 |
| hsa-miR-1292 | NM_0013643 | MEF2C | 1 |
| hsa-miR-1292 | NM_0013643 | MEF2C | 1 |
| hsa-miR-147C | NM_0013643 | MEF2C | 1 |
| hsa-miR-103b | NM_0013643 | MEF2C | 1 |
| hsa-miR-1825 | NM_0013643 | MEF2C | 1 |
| hsa-miR-1908 | NM_0013643 | MEF2C | 1 |
| hsa-miR-1911 | NM_0013643 | MEF2C | 1 |
| hsa-miR-1912 | NM_0013643 | MEF2C | 1 |
| hsa-miR-2116 | NM_0013643 | MEF2C | 1 |
| hsa-miR-2276 | NM_0013643 | MEF2C | 1 |
| hsa-miR-2277 | NM_0013643 | MEF2C | 1 |
| hsa-miR-2681 | NM_0013643 | MEF2C | 1 |
| hsa-miR-718  | NM_0013643 | MEF2C | 1 |
| hsa-miR-3121 | NM_0013643 | MEF2C | 1 |
| hsa-miR-3127 | NM_0013643 | MEF2C | 1 |
| hsa-miR-3127 | NM_0013643 | MEF2C | 1 |
| hsa-miR-466  | NM_0013643 | MEF2C | 1 |
| hsa-miR-544b | NM_0013643 | MEF2C | 1 |
| hsa-miR-314C | NM_0013643 | MEF2C | 1 |
| hsa-miR-3144 | NM_0013643 | MEF2C | 1 |
| hsa-miR-3145 | NM_0013643 | MEF2C | 1 |
| hsa-miR-3149 | NM_0013643 | MEF2C | 1 |
| hsa-miR-3151 | NM_0013643 | MEF2C | 1 |
| hsa-miR-3151 | NM_0013643 | MEF2C | 1 |
| hsa-miR-3158 | NM_0013643 | MEF2C | 1 |
| hsa-miR-3158 | NM_0013643 | MEF2C | 1 |
| hsa-miR-3158 | NM_0013643 | MEF2C | 1 |
| hsa-miR-3162 | NM_0013643 | MEF2C | 1 |
| hsa-miR-3162 | NM_0013643 | MEF2C | 1 |
| hsa-miR-317C | NM_0013643 | MEF2C | 1 |
| hsa-miR-3173 | NM_0013643 | MEF2C | 1 |
| hsa-miR-3174 | NM_0013643 | MEF2C | 1 |
| hsa-miR-3175 | NM_0013643 | MEF2C | 1 |
| hsa-miR-3186 | NM_0013643 | MEF2C | 1 |
| hsa-miR-3186 | NM_0013643 | MEF2C | 1 |
| hsa-miR-319C | NM_0013643 | MEF2C | 1 |
| hsa-miR-3194 | NM_0013643 | MEF2C | 1 |
| hsa-miR-4297 | NM_0013643 | MEF2C | 1 |
| hsa-miR-4312 | NM_0013643 | MEF2C | 1 |
| hsa-miR-4313 | NM_0013643 | MEF2C | 1 |
| hsa-miR-4259 | NM_0013643 | MEF2C | 1 |
| hsa-miR-426C | NM_0013643 | MEF2C | 1 |
| hsa-miR-4279 | NM_0013643 | MEF2C | 1 |
| hsa-miR-4289 | NM_0013643 | MEF2C | 1 |
| hsa-miR-429C | NM_0013643 | MEF2C | 1 |
| hsa-miR-429C | NM_0013643 | MEF2C | 1 |
| hsa-miR-361C | NM_0013643 | MEF2C | 1 |
| hsa-miR-3619 | NM_0013643 | MEF2C | 1 |
| hsa-miR-23c  | NM_0013643 | MEF2C | 1 |
| hsa-miR-3622 | NM_0013643 | MEF2C | 1 |
| hsa-miR-3649 | NM_0013643 | MEF2C | 1 |
| hsa-miR-365C | NM_0013643 | MEF2C | 1 |
| hsa-miR-3667 | NM_0013643 | MEF2C | 1 |
| hsa-miR-3677 | NM_0013643 | MEF2C | 1 |
| hsa-miR-3682 | NM_0013643 | MEF2C | 1 |
| hsa-miR-3685 | NM_0013643 | MEF2C | 1 |
| hsa-miR-3688 | NM_0013643 | MEF2C | 1 |
| hsa-miR-3688 | NM_0013643 | MEF2C | 1 |
| hsa-miR-369C | NM_0013643 | MEF2C | 1 |
| hsa-miR-369C | NM_0013643 | MEF2C | 1 |
| hsa-miR-3908 | NM_0013643 | MEF2C | 1 |
| hsa-miR-3909 | NM_0013643 | MEF2C | 1 |
| hsa-miR-3921 | NM_0013643 | MEF2C | 1 |
| hsa-miR-3936 | NM_0013643 | MEF2C | 1 |
| hsa-miR-3938 | NM_0013643 | MEF2C | 1 |
| hsa-miR-394C | NM_0013643 | MEF2C | 1 |
| hsa-miR-3943 | NM_0013643 | MEF2C | 1 |
| hsa-miR-3944 | NM_0013643 | MEF2C | 1 |
| hsa-miR-642b | NM_0013643 | MEF2C | 1 |
| hsa-miR-550b | NM_0013643 | MEF2C | 1 |
| hsa-miR-4418 | NM_0013643 | MEF2C | 1 |
| hsa-miR-4425 | NM_0013643 | MEF2C | 1 |





|                                 |   |
|---------------------------------|---|
| hsa-miR-7111 NM_0013643 MEF2C   | 1 |
| hsa-miR-7114 NM_0013643 MEF2C   | 1 |
| hsa-miR-7114 NM_0013643 MEF2C   | 1 |
| hsa-miR-7151 NM_0013643 MEF2C   | 1 |
| hsa-miR-7157 NM_0013643 MEF2C   | 1 |
| hsa-miR-7162 NM_0013643 MEF2C   | 1 |
| hsa-miR-7162 NM_0013643 MEF2C   | 1 |
| hsa-miR-7703 NM_0013643 MEF2C   | 1 |
| hsa-miR-7848 NM_0013643 MEF2C   | 1 |
| hsa-miR-7848 NM_0013643 MEF2C   | 1 |
| hsa-miR-7853 NM_0013643 MEF2C   | 1 |
| hsa-miR-7975 NM_0013643 MEF2C   | 1 |
| hsa-miR-7978 NM_0013643 MEF2C   | 1 |
| hsa-miR-8053 NM_0013643 MEF2C   | 1 |
| hsa-miR-8058 NM_0013643 MEF2C   | 1 |
| hsa-miR-8083 NM_0013643 MEF2C   | 1 |
| hsa-miR-8485 NM_0013643 MEF2C   | 1 |
| hsa-miR-1035 NM_0013643 MEF2C   | 1 |
| hsa-miR-1040 NM_0013643 MEF2C   | 1 |
| hsa-miR-1118 NM_0013643 MEF2C   | 1 |
| hsa-miR-1135 NM_0013643 MEF2C   | 1 |
| hsa-miR-3059 NM_0013643 MEF2C   | 1 |
| hsa-miR-3059 NM_0013643 MEF2C   | 1 |
| hsa-miR-3085 NM_0013643 MEF2C   | 1 |
| hsa-miR-3085 NM_0013643 MEF2C   | 1 |
| hsa-miR-6525 NM_0013643 MEF2C   | 1 |
| hsa-miR-1211 NM_0013643 MEF2C   | 1 |
| hsa-miR-1212 NM_0013643 MEF2C   | 1 |
| hsa-let-7a-2-3 NM_0013643 MEF2C | 1 |
| hsa-let-7a-2-3 NM_0013643 MEF2C | 1 |
| hsa-let-7c-3p NM_0013643 MEF2C  | 1 |
| hsa-let-7e-3p NM_0013643 MEF2C  | 1 |
| hsa-let-7e-3p NM_0013643 MEF2C  | 1 |
| hsa-miR-19b- NM_0013643 MEF2C   | 1 |
| hsa-miR-22-5j NM_0013643 MEF2C  | 1 |
| hsa-miR-23a- NM_0013643 MEF2C   | 1 |
| hsa-miR-26b- NM_0013643 MEF2C   | 1 |
| hsa-miR-27a- NM_0013643 MEF2C   | 1 |
| hsa-miR-29a- NM_0013643 MEF2C   | 1 |
| hsa-miR-96-5j NM_0013643 MEF2C  | 1 |
| hsa-miR-29b- NM_0013643 MEF2C   | 1 |
| hsa-miR-103a NM_0013643 MEF2C   | 1 |
| hsa-miR-105- NM_0013643 MEF2C   | 1 |
| hsa-miR-129- NM_0013643 MEF2C   | 1 |
| hsa-miR-129- NM_0013643 MEF2C   | 1 |
| hsa-miR-30d- NM_0013643 MEF2C   | 1 |
| hsa-miR-183- NM_0013643 MEF2C   | 1 |
| hsa-miR-205- NM_0013643 MEF2C   | 1 |
| hsa-miR-210- NM_0013643 MEF2C   | 1 |
| hsa-miR-211- NM_0013643 MEF2C   | 1 |
| hsa-miR-211- NM_0013643 MEF2C   | 1 |
| hsa-miR-214- NM_0013643 MEF2C   | 1 |
| hsa-miR-218- NM_0013643 MEF2C   | 1 |
| hsa-miR-221- NM_0013643 MEF2C   | 1 |
| hsa-miR-221- NM_0013643 MEF2C   | 1 |
| hsa-let-7g-3p NM_0013643 MEF2C  | 1 |
| hsa-let-7i-3p NM_0013643 MEF2C  | 1 |
| hsa-let-7i-3p NM_0013643 MEF2C  | 1 |
| hsa-miR-125b NM_0013643 MEF2C   | 1 |
| hsa-miR-137- NM_0013643 MEF2C   | 1 |
| hsa-miR-191- NM_0013643 MEF2C   | 1 |
| hsa-miR-125a NM_0013643 MEF2C   | 1 |
| hsa-miR-127- NM_0013643 MEF2C   | 1 |
| hsa-miR-129- NM_0013643 MEF2C   | 1 |
| hsa-miR-149- NM_0013643 MEF2C   | 1 |
| hsa-miR-149- NM_0013643 MEF2C   | 1 |
| hsa-miR-154- NM_0013643 MEF2C   | 1 |
| hsa-miR-186- NM_0013643 MEF2C   | 1 |
| hsa-miR-188- NM_0013643 MEF2C   | 1 |
| hsa-miR-195- NM_0013643 MEF2C   | 1 |
| hsa-miR-320a NM_0013643 MEF2C   | 1 |
| hsa-miR-296- NM_0013643 MEF2C   | 1 |
| hsa-miR-362- NM_0013643 MEF2C   | 1 |
| hsa-miR-302b NM_0013643 MEF2C   | 1 |
| hsa-miR-370- NM_0013643 MEF2C   | 1 |
| hsa-miR-371a NM_0013643 MEF2C   | 1 |
| hsa-miR-376a NM_0013643 MEF2C   | 1 |
| hsa-miR-330- NM_0013643 MEF2C   | 1 |
| hsa-miR-328- NM_0013643 MEF2C   | 1 |
| hsa-miR-328- NM_0013643 MEF2C   | 1 |
| hsa-miR-326 NM_0013643 MEF2C    | 1 |
| hsa-miR-148b NM_0013643 MEF2C   | 1 |
| hsa-miR-133b NM_0013643 MEF2C   | 1 |
| hsa-miR-448 NM_0013643 MEF2C    | 1 |
| hsa-miR-329- NM_0013643 MEF2C   | 1 |
| hsa-miR-409- NM_0013643 MEF2C   | 1 |
| hsa-miR-202- NM_0013643 MEF2C   | 1 |
| hsa-miR-492 NM_0013643 MEF2C    | 1 |
| hsa-miR-494- NM_0013643 MEF2C   | 1 |
| hsa-miR-193b NM_0013643 MEF2C   | 1 |
| hsa-miR-193b NM_0013643 MEF2C   | 1 |

|                               |   |
|-------------------------------|---|
| hsa-miR-497- NM_0013643 MEF2C | 1 |
| hsa-miR-520e NM_0013643 MEF2C | 1 |
| hsa-miR-519e NM_0013643 MEF2C | 1 |
| hsa-miR-519e NM_0013643 MEF2C | 1 |
| hsa-miR-523- NM_0013643 MEF2C | 1 |
| hsa-miR-519d NM_0013643 MEF2C | 1 |
| hsa-miR-520g NM_0013643 MEF2C | 1 |
| hsa-miR-518a NM_0013643 MEF2C | 1 |
| hsa-miR-520h NM_0013643 MEF2C | 1 |
| hsa-miR-504- NM_0013643 MEF2C | 1 |
| hsa-miR-509- NM_0013643 MEF2C | 1 |
| hsa-miR-455- NM_0013643 MEF2C | 1 |
| hsa-miR-552- NM_0013643 MEF2C | 1 |
| hsa-miR-554 NM_0013643 MEF2C  | 1 |
| hsa-miR-585- NM_0013643 MEF2C | 1 |
| hsa-miR-588 NM_0013643 MEF2C  | 1 |
| hsa-miR-550a NM_0013643 MEF2C | 1 |
| hsa-miR-592 NM_0013643 MEF2C  | 1 |
| hsa-miR-603 NM_0013643 MEF2C  | 1 |
| hsa-miR-615- NM_0013643 MEF2C | 1 |
| hsa-miR-618 NM_0013643 MEF2C  | 1 |
| hsa-miR-619- NM_0013643 MEF2C | 1 |
| hsa-miR-625- NM_0013643 MEF2C | 1 |
| hsa-miR-627- NM_0013643 MEF2C | 1 |
| hsa-miR-638 NM_0013643 MEF2C  | 1 |
| hsa-miR-642a NM_0013643 MEF2C | 1 |
| hsa-miR-645 NM_0013643 MEF2C  | 1 |
| hsa-miR-648 NM_0013643 MEF2C  | 1 |
| hsa-miR-652- NM_0013643 MEF2C | 1 |
| hsa-miR-652- NM_0013643 MEF2C | 1 |
| hsa-miR-654- NM_0013643 MEF2C | 1 |
| hsa-miR-549a NM_0013643 MEF2C | 1 |
| hsa-miR-659- NM_0013643 MEF2C | 1 |
| hsa-miR-767- NM_0013643 MEF2C | 1 |
| hsa-miR-1224 NM_0013643 MEF2C | 1 |
| hsa-miR-1271 NM_0013643 MEF2C | 1 |
| hsa-miR-1283 NM_0013643 MEF2C | 1 |
| hsa-miR-769- NM_0013643 MEF2C | 1 |
| hsa-miR-670- NM_0013643 MEF2C | 1 |
| hsa-miR-2113 NM_0013643 MEF2C | 1 |
| hsa-miR-764 NM_0013643 MEF2C  | 1 |
| hsa-miR-675- NM_0013643 MEF2C | 1 |
| hsa-miR-675- NM_0013643 MEF2C | 1 |
| hsa-miR-891a NM_0013643 MEF2C | 1 |
| hsa-miR-892b NM_0013643 MEF2C | 1 |
| hsa-miR-892b NM_0013643 MEF2C | 1 |
| hsa-miR-708- NM_0013643 MEF2C | 1 |
| hsa-miR-887- NM_0013643 MEF2C | 1 |
| hsa-miR-933 NM_0013643 MEF2C  | 1 |
| hsa-miR-935 NM_0013643 MEF2C  | 1 |
| hsa-miR-940 NM_0013643 MEF2C  | 1 |
| hsa-miR-1178 NM_0013643 MEF2C | 1 |
| hsa-miR-118C NM_0013643 MEF2C | 1 |
| hsa-miR-1227 NM_0013643 MEF2C | 1 |
| hsa-miR-1229 NM_0013643 MEF2C | 1 |
| hsa-miR-1233 NM_0013643 MEF2C | 1 |
| hsa-miR-1234 NM_0013643 MEF2C | 1 |
| hsa-miR-1204 NM_0013643 MEF2C | 1 |
| hsa-miR-1286 NM_0013643 MEF2C | 1 |
| hsa-miR-1287 NM_0013643 MEF2C | 1 |
| hsa-miR-1303 NM_0013643 MEF2C | 1 |
| hsa-miR-1247 NM_0013643 MEF2C | 1 |
| hsa-miR-1251 NM_0013643 MEF2C | 1 |
| hsa-miR-1253 NM_0013643 MEF2C | 1 |
| hsa-miR-1256 NM_0013643 MEF2C | 1 |
| hsa-miR-1281 NM_0013643 MEF2C | 1 |
| hsa-miR-1292 NM_0013643 MEF2C | 1 |
| hsa-miR-147C NM_0013643 MEF2C | 1 |
| hsa-miR-103b NM_0013643 MEF2C | 1 |
| hsa-miR-1825 NM_0013643 MEF2C | 1 |
| hsa-miR-1908 NM_0013643 MEF2C | 1 |
| hsa-miR-1911 NM_0013643 MEF2C | 1 |
| hsa-miR-1912 NM_0013643 MEF2C | 1 |
| hsa-miR-1973 NM_0013643 MEF2C | 1 |
| hsa-miR-2277 NM_0013643 MEF2C | 1 |
| hsa-miR-718 NM_0013643 MEF2C  | 1 |
| hsa-miR-3121 NM_0013643 MEF2C | 1 |
| hsa-miR-3125 NM_0013643 MEF2C | 1 |
| hsa-miR-3126 NM_0013643 MEF2C | 1 |
| hsa-miR-466 NM_0013643 MEF2C  | 1 |
| hsa-miR-544b NM_0013643 MEF2C | 1 |
| hsa-miR-314C NM_0013643 MEF2C | 1 |
| hsa-miR-3144 NM_0013643 MEF2C | 1 |
| hsa-miR-3145 NM_0013643 MEF2C | 1 |
| hsa-miR-3149 NM_0013643 MEF2C | 1 |
| hsa-miR-3151 NM_0013643 MEF2C | 1 |
| hsa-miR-3158 NM_0013643 MEF2C | 1 |
| hsa-miR-3158 NM_0013643 MEF2C | 1 |
| hsa-miR-3162 NM_0013643 MEF2C | 1 |
| hsa-miR-3162 NM_0013643 MEF2C | 1 |
| hsa-miR-3169 NM_0013643 MEF2C | 1 |
| hsa-miR-317C NM_0013643 MEF2C | 1 |
| hsa-miR-3173 NM_0013643 MEF2C | 1 |
| hsa-miR-3174 NM_0013643 MEF2C | 1 |







|                                 |   |
|---------------------------------|---|
| hsa-miR-6817 NM_0013643 MEF2C   | 1 |
| hsa-miR-6817 NM_0013643 MEF2C   | 1 |
| hsa-miR-6820 NM_0013643 MEF2C   | 1 |
| hsa-miR-6825 NM_0013643 MEF2C   | 1 |
| hsa-miR-6827 NM_0013643 MEF2C   | 1 |
| hsa-miR-6827 NM_0013643 MEF2C   | 1 |
| hsa-miR-6832 NM_0013643 MEF2C   | 1 |
| hsa-miR-6780 NM_0013643 MEF2C   | 1 |
| hsa-miR-6837 NM_0013643 MEF2C   | 1 |
| hsa-miR-6845 NM_0013643 MEF2C   | 1 |
| hsa-miR-6846 NM_0013643 MEF2C   | 1 |
| hsa-miR-6850 NM_0013643 MEF2C   | 1 |
| hsa-miR-6851 NM_0013643 MEF2C   | 1 |
| hsa-miR-6852 NM_0013643 MEF2C   | 1 |
| hsa-miR-6853 NM_0013643 MEF2C   | 1 |
| hsa-miR-6854 NM_0013643 MEF2C   | 1 |
| hsa-miR-6859 NM_0013643 MEF2C   | 1 |
| hsa-miR-6861 NM_0013643 MEF2C   | 1 |
| hsa-miR-6864 NM_0013643 MEF2C   | 1 |
| hsa-miR-6865 NM_0013643 MEF2C   | 1 |
| hsa-miR-6865 NM_0013643 MEF2C   | 1 |
| hsa-miR-6867 NM_0013643 MEF2C   | 1 |
| hsa-miR-6868 NM_0013643 MEF2C   | 1 |
| hsa-miR-6878 NM_0013643 MEF2C   | 1 |
| hsa-miR-6882 NM_0013643 MEF2C   | 1 |
| hsa-miR-6882 NM_0013643 MEF2C   | 1 |
| hsa-miR-6885 NM_0013643 MEF2C   | 1 |
| hsa-miR-6885 NM_0013643 MEF2C   | 1 |
| hsa-miR-6887 NM_0013643 MEF2C   | 1 |
| hsa-miR-6887 NM_0013643 MEF2C   | 1 |
| hsa-miR-6887 NM_0013643 MEF2C   | 1 |
| hsa-miR-6888 NM_0013643 MEF2C   | 1 |
| hsa-miR-6891 NM_0013643 MEF2C   | 1 |
| hsa-miR-6893 NM_0013643 MEF2C   | 1 |
| hsa-miR-7107 NM_0013643 MEF2C   | 1 |
| hsa-miR-7108 NM_0013643 MEF2C   | 1 |
| hsa-miR-7109 NM_0013643 MEF2C   | 1 |
| hsa-miR-7110 NM_0013643 MEF2C   | 1 |
| hsa-miR-7111 NM_0013643 MEF2C   | 1 |
| hsa-miR-7114 NM_0013643 MEF2C   | 1 |
| hsa-miR-7151 NM_0013643 MEF2C   | 1 |
| hsa-miR-7157 NM_0013643 MEF2C   | 1 |
| hsa-miR-7162 NM_0013643 MEF2C   | 1 |
| hsa-miR-7162 NM_0013643 MEF2C   | 1 |
| hsa-miR-7703 NM_0013643 MEF2C   | 1 |
| hsa-miR-1273 NM_0013643 MEF2C   | 1 |
| hsa-miR-7848 NM_0013643 MEF2C   | 1 |
| hsa-miR-7849 NM_0013643 MEF2C   | 1 |
| hsa-miR-7853 NM_0013643 MEF2C   | 1 |
| hsa-miR-7975 NM_0013643 MEF2C   | 1 |
| hsa-miR-7978 NM_0013643 MEF2C   | 1 |
| hsa-miR-8053 NM_0013643 MEF2C   | 1 |
| hsa-miR-8057 NM_0013643 MEF2C   | 1 |
| hsa-miR-8058 NM_0013643 MEF2C   | 1 |
| hsa-miR-8058 NM_0013643 MEF2C   | 1 |
| hsa-miR-8059 NM_0013643 MEF2C   | 1 |
| hsa-miR-8075 NM_0013643 MEF2C   | 1 |
| hsa-miR-8083 NM_0013643 MEF2C   | 1 |
| hsa-miR-8485 NM_0013643 MEF2C   | 1 |
| hsa-miR-1039 NM_0013643 MEF2C   | 1 |
| hsa-miR-1040 NM_0013643 MEF2C   | 1 |
| hsa-miR-1118 NM_0013643 MEF2C   | 1 |
| hsa-miR-1139 NM_0013643 MEF2C   | 1 |
| hsa-miR-3059 NM_0013643 MEF2C   | 1 |
| hsa-miR-3059 NM_0013643 MEF2C   | 1 |
| hsa-miR-3085 NM_0013643 MEF2C   | 1 |
| hsa-miR-3085 NM_0013643 MEF2C   | 1 |
| hsa-miR-6529 NM_0013643 MEF2C   | 1 |
| hsa-miR-1211 NM_0013643 MEF2C   | 1 |
| hsa-miR-1212 NM_0013643 MEF2C   | 1 |
| hsa-miR-1213 NM_0013643 MEF2C   | 1 |
| hsa-let-7a-2-3 NM_0013643 MEF2C | 1 |
| hsa-let-7a-2-3 NM_0013643 MEF2C | 1 |
| hsa-let-7c-3p NM_0013643 MEF2C  | 1 |
| hsa-let-7e-3p NM_0013643 MEF2C  | 1 |
| hsa-let-7e-3p NM_0013643 MEF2C  | 1 |
| hsa-miR-18a- NM_0013643 MEF2C   | 1 |
| hsa-miR-19b- NM_0013643 MEF2C   | 1 |
| hsa-miR-22-5j NM_0013643 MEF2C  | 1 |
| hsa-miR-23a- NM_0013643 MEF2C   | 1 |
| hsa-miR-27a- NM_0013643 MEF2C   | 1 |
| hsa-miR-29a- NM_0013643 MEF2C   | 1 |
| hsa-miR-33a- NM_0013643 MEF2C   | 1 |
| hsa-miR-96-5j NM_0013643 MEF2C  | 1 |
| hsa-miR-29b- NM_0013643 MEF2C   | 1 |
| hsa-miR-103a NM_0013643 MEF2C   | 1 |
| hsa-miR-107 NM_0013643 MEF2C    | 1 |
| hsa-miR-129- NM_0013643 MEF2C   | 1 |
| hsa-miR-30d- NM_0013643 MEF2C   | 1 |
| hsa-miR-183- NM_0013643 MEF2C   | 1 |
| hsa-miR-204- NM_0013643 MEF2C   | 1 |
| hsa-miR-205- NM_0013643 MEF2C   | 1 |
| hsa-miR-210- NM_0013643 MEF2C   | 1 |
| hsa-miR-211- NM_0013643 MEF2C   | 1 |

|               |            |       |   |
|---------------|------------|-------|---|
| hsa-miR-211-  | NM_0013643 | MEF2C | 1 |
| hsa-miR-214-  | NM_0013643 | MEF2C | 1 |
| hsa-miR-218-  | NM_0013643 | MEF2C | 1 |
| hsa-miR-221-  | NM_0013643 | MEF2C | 1 |
| hsa-miR-221-  | NM_0013643 | MEF2C | 1 |
| hsa-let-7g-3p | NM_0013643 | MEF2C | 1 |
| hsa-let-7i-3p | NM_0013643 | MEF2C | 1 |
| hsa-let-7i-3p | NM_0013643 | MEF2C | 1 |
| hsa-miR-125t  | NM_0013643 | MEF2C | 1 |
| hsa-miR-137-  | NM_0013643 | MEF2C | 1 |
| hsa-miR-191-  | NM_0013643 | MEF2C | 1 |
| hsa-miR-125a  | NM_0013643 | MEF2C | 1 |
| hsa-miR-154-  | NM_0013643 | MEF2C | 1 |
| hsa-miR-186-  | NM_0013643 | MEF2C | 1 |
| hsa-miR-188-  | NM_0013643 | MEF2C | 1 |
| hsa-miR-195-  | NM_0013643 | MEF2C | 1 |
| hsa-miR-320a  | NM_0013643 | MEF2C | 1 |
| hsa-miR-296-  | NM_0013643 | MEF2C | 1 |
| hsa-miR-362-  | NM_0013643 | MEF2C | 1 |
| hsa-miR-370-  | NM_0013643 | MEF2C | 1 |
| hsa-miR-371a  | NM_0013643 | MEF2C | 1 |
| hsa-miR-376a  | NM_0013643 | MEF2C | 1 |
| hsa-miR-330-  | NM_0013643 | MEF2C | 1 |
| hsa-miR-328-  | NM_0013643 | MEF2C | 1 |
| hsa-miR-342-  | NM_0013643 | MEF2C | 1 |
| hsa-miR-148t  | NM_0013643 | MEF2C | 1 |
| hsa-miR-324-  | NM_0013643 | MEF2C | 1 |
| hsa-miR-133t  | NM_0013643 | MEF2C | 1 |
| hsa-miR-448   | NM_0013643 | MEF2C | 1 |
| hsa-miR-329-  | NM_0013643 | MEF2C | 1 |
| hsa-miR-409-  | NM_0013643 | MEF2C | 1 |
| hsa-miR-202-  | NM_0013643 | MEF2C | 1 |
| hsa-miR-492   | NM_0013643 | MEF2C | 1 |
| hsa-miR-494-  | NM_0013643 | MEF2C | 1 |
| hsa-miR-193t  | NM_0013643 | MEF2C | 1 |
| hsa-miR-193t  | NM_0013643 | MEF2C | 1 |
| hsa-miR-497-  | NM_0013643 | MEF2C | 1 |
| hsa-miR-512-  | NM_0013643 | MEF2C | 1 |
| hsa-miR-520e  | NM_0013643 | MEF2C | 1 |
| hsa-miR-523-  | NM_0013643 | MEF2C | 1 |
| hsa-miR-519d  | NM_0013643 | MEF2C | 1 |
| hsa-miR-520g  | NM_0013643 | MEF2C | 1 |
| hsa-miR-520h  | NM_0013643 | MEF2C | 1 |
| hsa-miR-516a  | NM_0013643 | MEF2C | 1 |
| hsa-miR-504-  | NM_0013643 | MEF2C | 1 |
| hsa-miR-509-  | NM_0013643 | MEF2C | 1 |
| hsa-miR-514a  | NM_0013643 | MEF2C | 1 |
| hsa-miR-455-  | NM_0013643 | MEF2C | 1 |
| hsa-miR-552-  | NM_0013643 | MEF2C | 1 |
| hsa-miR-552-  | NM_0013643 | MEF2C | 1 |
| hsa-miR-554   | NM_0013643 | MEF2C | 1 |
| hsa-miR-557   | NM_0013643 | MEF2C | 1 |
| hsa-miR-585-  | NM_0013643 | MEF2C | 1 |
| hsa-miR-588   | NM_0013643 | MEF2C | 1 |
| hsa-miR-550a  | NM_0013643 | MEF2C | 1 |
| hsa-miR-592   | NM_0013643 | MEF2C | 1 |
| hsa-miR-603   | NM_0013643 | MEF2C | 1 |
| hsa-miR-615-  | NM_0013643 | MEF2C | 1 |
| hsa-miR-618   | NM_0013643 | MEF2C | 1 |
| hsa-miR-619-  | NM_0013643 | MEF2C | 1 |
| hsa-miR-625-  | NM_0013643 | MEF2C | 1 |
| hsa-miR-627-  | NM_0013643 | MEF2C | 1 |
| hsa-miR-638   | NM_0013643 | MEF2C | 1 |
| hsa-miR-642a  | NM_0013643 | MEF2C | 1 |
| hsa-miR-648   | NM_0013643 | MEF2C | 1 |
| hsa-miR-652-  | NM_0013643 | MEF2C | 1 |
| hsa-miR-652-  | NM_0013643 | MEF2C | 1 |
| hsa-miR-654-  | NM_0013643 | MEF2C | 1 |
| hsa-miR-549a  | NM_0013643 | MEF2C | 1 |
| hsa-miR-659-  | NM_0013643 | MEF2C | 1 |
| hsa-miR-659-  | NM_0013643 | MEF2C | 1 |
| hsa-miR-767-  | NM_0013643 | MEF2C | 1 |
| hsa-miR-1224  | NM_0013643 | MEF2C | 1 |
| hsa-miR-320t  | NM_0013643 | MEF2C | 1 |
| hsa-miR-1296  | NM_0013643 | MEF2C | 1 |
| hsa-miR-1271  | NM_0013643 | MEF2C | 1 |
| hsa-miR-449c  | NM_0013643 | MEF2C | 1 |
| hsa-miR-1283  | NM_0013643 | MEF2C | 1 |
| hsa-miR-769-  | NM_0013643 | MEF2C | 1 |
| hsa-miR-670-  | NM_0013643 | MEF2C | 1 |
| hsa-miR-764   | NM_0013643 | MEF2C | 1 |
| hsa-miR-675-  | NM_0013643 | MEF2C | 1 |
| hsa-miR-891a  | NM_0013643 | MEF2C | 1 |
| hsa-miR-892t  | NM_0013643 | MEF2C | 1 |
| hsa-miR-892t  | NM_0013643 | MEF2C | 1 |
| hsa-miR-708-  | NM_0013643 | MEF2C | 1 |
| hsa-miR-744-  | NM_0013643 | MEF2C | 1 |
| hsa-miR-887-  | NM_0013643 | MEF2C | 1 |
| hsa-miR-933   | NM_0013643 | MEF2C | 1 |
| hsa-miR-935   | NM_0013643 | MEF2C | 1 |
| hsa-miR-940   | NM_0013643 | MEF2C | 1 |
| hsa-miR-1178  | NM_0013643 | MEF2C | 1 |
| hsa-miR-1178  | NM_0013643 | MEF2C | 1 |
| hsa-miR-1180  | NM_0013643 | MEF2C | 1 |

|                               |   |
|-------------------------------|---|
| hsa-miR-1227 NM_0013643 MEF2C | 1 |
| hsa-miR-1229 NM_0013643 MEF2C | 1 |
| hsa-miR-1233 NM_0013643 MEF2C | 1 |
| hsa-miR-1234 NM_0013643 MEF2C | 1 |
| hsa-miR-1204 NM_0013643 MEF2C | 1 |
| hsa-miR-1286 NM_0013643 MEF2C | 1 |
| hsa-miR-1287 NM_0013643 MEF2C | 1 |
| hsa-miR-1287 NM_0013643 MEF2C | 1 |
| hsa-miR-1303 NM_0013643 MEF2C | 1 |
| hsa-miR-1247 NM_0013643 MEF2C | 1 |
| hsa-miR-1251 NM_0013643 MEF2C | 1 |
| hsa-miR-1253 NM_0013643 MEF2C | 1 |
| hsa-miR-1256 NM_0013643 MEF2C | 1 |
| hsa-miR-1281 NM_0013643 MEF2C | 1 |
| hsa-miR-1292 NM_0013643 MEF2C | 1 |
| hsa-miR-1470 NM_0013643 MEF2C | 1 |
| hsa-miR-103b NM_0013643 MEF2C | 1 |
| hsa-miR-1825 NM_0013643 MEF2C | 1 |
| hsa-miR-1908 NM_0013643 MEF2C | 1 |
| hsa-miR-1911 NM_0013643 MEF2C | 1 |
| hsa-miR-1973 NM_0013643 MEF2C | 1 |
| hsa-miR-2116 NM_0013643 MEF2C | 1 |
| hsa-miR-2276 NM_0013643 MEF2C | 1 |
| hsa-miR-2277 NM_0013643 MEF2C | 1 |
| hsa-miR-718 NM_0013643 MEF2C  | 1 |
| hsa-miR-3121 NM_0013643 MEF2C | 1 |
| hsa-miR-3125 NM_0013643 MEF2C | 1 |
| hsa-miR-3126 NM_0013643 MEF2C | 1 |
| hsa-miR-3127 NM_0013643 MEF2C | 1 |
| hsa-miR-466 NM_0013643 MEF2C  | 1 |
| hsa-miR-544b NM_0013643 MEF2C | 1 |
| hsa-miR-3139 NM_0013643 MEF2C | 1 |
| hsa-miR-3140 NM_0013643 MEF2C | 1 |
| hsa-miR-3144 NM_0013643 MEF2C | 1 |
| hsa-miR-3144 NM_0013643 MEF2C | 1 |
| hsa-miR-3145 NM_0013643 MEF2C | 1 |
| hsa-miR-3149 NM_0013643 MEF2C | 1 |
| hsa-miR-3151 NM_0013643 MEF2C | 1 |
| hsa-miR-3158 NM_0013643 MEF2C | 1 |
| hsa-miR-3158 NM_0013643 MEF2C | 1 |
| hsa-miR-3162 NM_0013643 MEF2C | 1 |
| hsa-miR-3162 NM_0013643 MEF2C | 1 |
| hsa-miR-3170 NM_0013643 MEF2C | 1 |
| hsa-miR-3173 NM_0013643 MEF2C | 1 |
| hsa-miR-3174 NM_0013643 MEF2C | 1 |
| hsa-miR-3175 NM_0013643 MEF2C | 1 |
| hsa-miR-3186 NM_0013643 MEF2C | 1 |
| hsa-miR-3186 NM_0013643 MEF2C | 1 |
| hsa-miR-3186 NM_0013643 MEF2C | 1 |
| hsa-miR-3190 NM_0013643 MEF2C | 1 |
| hsa-miR-4297 NM_0013643 MEF2C | 1 |
| hsa-miR-4312 NM_0013643 MEF2C | 1 |
| hsa-miR-4313 NM_0013643 MEF2C | 1 |
| hsa-miR-4259 NM_0013643 MEF2C | 1 |
| hsa-miR-4260 NM_0013643 MEF2C | 1 |
| hsa-miR-4260 NM_0013643 MEF2C | 1 |
| hsa-miR-4279 NM_0013643 MEF2C | 1 |
| hsa-miR-4286 NM_0013643 MEF2C | 1 |
| hsa-miR-4289 NM_0013643 MEF2C | 1 |
| hsa-miR-4290 NM_0013643 MEF2C | 1 |
| hsa-miR-500b NM_0013643 MEF2C | 1 |
| hsa-miR-3610 NM_0013643 MEF2C | 1 |
| hsa-miR-3619 NM_0013643 MEF2C | 1 |
| hsa-miR-3621 NM_0013643 MEF2C | 1 |
| hsa-miR-3622 NM_0013643 MEF2C | 1 |
| hsa-miR-3622 NM_0013643 MEF2C | 1 |
| hsa-miR-3649 NM_0013643 MEF2C | 1 |
| hsa-miR-3650 NM_0013643 MEF2C | 1 |
| hsa-miR-3667 NM_0013643 MEF2C | 1 |
| hsa-miR-3670 NM_0013643 MEF2C | 1 |
| hsa-miR-3677 NM_0013643 MEF2C | 1 |
| hsa-miR-3682 NM_0013643 MEF2C | 1 |
| hsa-miR-3685 NM_0013643 MEF2C | 1 |
| hsa-miR-3688 NM_0013643 MEF2C | 1 |
| hsa-miR-3688 NM_0013643 MEF2C | 1 |
| hsa-miR-3690 NM_0013643 MEF2C | 1 |
| hsa-miR-3908 NM_0013643 MEF2C | 1 |
| hsa-miR-3909 NM_0013643 MEF2C | 1 |
| hsa-miR-3921 NM_0013643 MEF2C | 1 |
| hsa-miR-3936 NM_0013643 MEF2C | 1 |
| hsa-miR-3940 NM_0013643 MEF2C | 1 |
| hsa-miR-3943 NM_0013643 MEF2C | 1 |
| hsa-miR-3944 NM_0013643 MEF2C | 1 |
| hsa-miR-550b NM_0013643 MEF2C | 1 |
| hsa-miR-4418 NM_0013643 MEF2C | 1 |
| hsa-miR-4425 NM_0013643 MEF2C | 1 |
| hsa-miR-4429 NM_0013643 MEF2C | 1 |
| hsa-miR-4432 NM_0013643 MEF2C | 1 |
| hsa-miR-4446 NM_0013643 MEF2C | 1 |
| hsa-miR-4449 NM_0013643 MEF2C | 1 |
| hsa-miR-548a NM_0013643 MEF2C | 1 |
| hsa-miR-4454 NM_0013643 MEF2C | 1 |
| hsa-miR-4457 NM_0013643 MEF2C | 1 |
| hsa-miR-4467 NM_0013643 MEF2C | 1 |
| hsa-miR-4488 NM_0013643 MEF2C | 1 |

|                               |   |
|-------------------------------|---|
| hsa-miR-4489 NM_0013643 MEF2C | 1 |
| hsa-miR-4498 NM_0013643 MEF2C | 1 |
| hsa-miR-2392 NM_0013643 MEF2C | 1 |
| hsa-miR-451C NM_0013643 MEF2C | 1 |
| hsa-miR-4524 NM_0013643 MEF2C | 1 |
| hsa-miR-3973 NM_0013643 MEF2C | 1 |
| hsa-miR-3978 NM_0013643 MEF2C | 1 |
| hsa-miR-4642 NM_0013643 MEF2C | 1 |
| hsa-miR-4642 NM_0013643 MEF2C | 1 |
| hsa-miR-4646 NM_0013643 MEF2C | 1 |
| hsa-miR-4646 NM_0013643 MEF2C | 1 |
| hsa-miR-4649 NM_0013643 MEF2C | 1 |
| hsa-miR-4655 NM_0013643 MEF2C | 1 |
| hsa-miR-4664 NM_0013643 MEF2C | 1 |
| hsa-miR-4667 NM_0013643 MEF2C | 1 |
| hsa-miR-4676 NM_0013643 MEF2C | 1 |
| hsa-miR-4681 NM_0013643 MEF2C | 1 |
| hsa-miR-4685 NM_0013643 MEF2C | 1 |
| hsa-miR-4687 NM_0013643 MEF2C | 1 |
| hsa-miR-4688 NM_0013643 MEF2C | 1 |
| hsa-miR-4689 NM_0013643 MEF2C | 1 |
| hsa-miR-4696 NM_0013643 MEF2C | 1 |
| hsa-miR-470C NM_0013643 MEF2C | 1 |
| hsa-miR-4701 NM_0013643 MEF2C | 1 |
| hsa-miR-4701 NM_0013643 MEF2C | 1 |
| hsa-miR-4706 NM_0013643 MEF2C | 1 |
| hsa-miR-4706 NM_0013643 MEF2C | 1 |
| hsa-miR-4707 NM_0013643 MEF2C | 1 |
| hsa-miR-4708 NM_0013643 MEF2C | 1 |
| hsa-miR-4709 NM_0013643 MEF2C | 1 |
| hsa-miR-4716 NM_0013643 MEF2C | 1 |
| hsa-miR-4716 NM_0013643 MEF2C | 1 |
| hsa-miR-4717 NM_0013643 MEF2C | 1 |
| hsa-miR-472C NM_0013643 MEF2C | 1 |
| hsa-miR-4722 NM_0013643 MEF2C | 1 |
| hsa-miR-4725 NM_0013643 MEF2C | 1 |
| hsa-miR-4728 NM_0013643 MEF2C | 1 |
| hsa-miR-4731 NM_0013643 MEF2C | 1 |
| hsa-miR-4733 NM_0013643 MEF2C | 1 |
| hsa-miR-4737 NM_0013643 MEF2C | 1 |
| hsa-miR-3064 NM_0013643 MEF2C | 1 |
| hsa-miR-4739 NM_0013643 MEF2C | 1 |
| hsa-miR-4742 NM_0013643 MEF2C | 1 |
| hsa-miR-4749 NM_0013643 MEF2C | 1 |
| hsa-miR-4749 NM_0013643 MEF2C | 1 |
| hsa-miR-499t NM_0013643 MEF2C | 1 |
| hsa-miR-4766 NM_0013643 MEF2C | 1 |
| hsa-miR-4783 NM_0013643 MEF2C | 1 |
| hsa-miR-4783 NM_0013643 MEF2C | 1 |
| hsa-miR-4784 NM_0013643 MEF2C | 1 |
| hsa-miR-4787 NM_0013643 MEF2C | 1 |
| hsa-miR-4789 NM_0013643 MEF2C | 1 |
| hsa-miR-4797 NM_0013643 MEF2C | 1 |
| hsa-miR-4804 NM_0013643 MEF2C | 1 |
| hsa-miR-5001 NM_0013643 MEF2C | 1 |
| hsa-miR-5001 NM_0013643 MEF2C | 1 |
| hsa-miR-5002 NM_0013643 MEF2C | 1 |
| hsa-miR-501C NM_0013643 MEF2C | 1 |
| hsa-miR-5193 NM_0013643 MEF2C | 1 |
| hsa-miR-5195 NM_0013643 MEF2C | 1 |
| hsa-miR-5584 NM_0013643 MEF2C | 1 |
| hsa-miR-548a NM_0013643 MEF2C | 1 |
| hsa-miR-5681 NM_0013643 MEF2C | 1 |
| hsa-miR-5689 NM_0013643 MEF2C | 1 |
| hsa-miR-4666 NM_0013643 MEF2C | 1 |
| hsa-miR-5707 NM_0013643 MEF2C | 1 |
| hsa-miR-6069 NM_0013643 MEF2C | 1 |
| hsa-miR-6072 NM_0013643 MEF2C | 1 |
| hsa-miR-6085 NM_0013643 MEF2C | 1 |
| hsa-miR-6125 NM_0013643 MEF2C | 1 |
| hsa-miR-6126 NM_0013643 MEF2C | 1 |
| hsa-miR-6499 NM_0013643 MEF2C | 1 |
| hsa-miR-6499 NM_0013643 MEF2C | 1 |
| hsa-miR-650C NM_0013643 MEF2C | 1 |
| hsa-miR-650C NM_0013643 MEF2C | 1 |
| hsa-miR-548a NM_0013643 MEF2C | 1 |
| hsa-miR-6503 NM_0013643 MEF2C | 1 |
| hsa-miR-6504 NM_0013643 MEF2C | 1 |
| hsa-miR-6504 NM_0013643 MEF2C | 1 |
| hsa-miR-6508 NM_0013643 MEF2C | 1 |
| hsa-miR-651C NM_0013643 MEF2C | 1 |
| hsa-miR-6511 NM_0013643 MEF2C | 1 |
| hsa-miR-6511 NM_0013643 MEF2C | 1 |
| hsa-miR-6715 NM_0013643 MEF2C | 1 |
| hsa-miR-6718 NM_0013643 MEF2C | 1 |
| hsa-miR-672C NM_0013643 MEF2C | 1 |
| hsa-miR-6721 NM_0013643 MEF2C | 1 |
| hsa-miR-892c NM_0013643 MEF2C | 1 |
| hsa-miR-6726 NM_0013643 MEF2C | 1 |
| hsa-miR-6727 NM_0013643 MEF2C | 1 |
| hsa-miR-6727 NM_0013643 MEF2C | 1 |
| hsa-miR-6729 NM_0013643 MEF2C | 1 |
| hsa-miR-6732 NM_0013643 MEF2C | 1 |
| hsa-miR-6732 NM_0013643 MEF2C | 1 |



|                                  |   |
|----------------------------------|---|
| hsa-miR-7703 NM_0013643 MEF2C    | 1 |
| hsa-miR-4433 NM_0013643 MEF2C    | 1 |
| hsa-miR-1273 NM_0013643 MEF2C    | 1 |
| hsa-miR-7848 NM_0013643 MEF2C    | 1 |
| hsa-miR-7849 NM_0013643 MEF2C    | 1 |
| hsa-miR-7853 NM_0013643 MEF2C    | 1 |
| hsa-miR-7975 NM_0013643 MEF2C    | 1 |
| hsa-miR-7978 NM_0013643 MEF2C    | 1 |
| hsa-miR-8058 NM_0013643 MEF2C    | 1 |
| hsa-miR-8059 NM_0013643 MEF2C    | 1 |
| hsa-miR-8070 NM_0013643 MEF2C    | 1 |
| hsa-miR-8075 NM_0013643 MEF2C    | 1 |
| hsa-miR-8083 NM_0013643 MEF2C    | 1 |
| hsa-miR-8485 NM_0013643 MEF2C    | 1 |
| hsa-miR-1039 NM_0013643 MEF2C    | 1 |
| hsa-miR-1040 NM_0013643 MEF2C    | 1 |
| hsa-miR-1118 NM_0013643 MEF2C    | 1 |
| hsa-miR-1139 NM_0013643 MEF2C    | 1 |
| hsa-miR-3059 NM_0013643 MEF2C    | 1 |
| hsa-miR-3059 NM_0013643 MEF2C    | 1 |
| hsa-miR-3085 NM_0013643 MEF2C    | 1 |
| hsa-miR-3085 NM_0013643 MEF2C    | 1 |
| hsa-miR-6529 NM_0013643 MEF2C    | 1 |
| hsa-miR-6529 NM_0013643 MEF2C    | 1 |
| hsa-miR-1211 NM_0013643 MEF2C    | 1 |
| hsa-miR-1211 NM_0013643 MEF2C    | 1 |
| hsa-miR-1212 NM_0013643 MEF2C    | 1 |
| hsa-let-7a-2-3 NM_0013643 MEF2C  | 1 |
| hsa-let-7a-2-3 NM_0013643 MEF2C  | 1 |
| hsa-let-7c-3p NM_0013643 MEF2C   | 1 |
| hsa-let-7e-3p NM_0013643 MEF2C   | 1 |
| hsa-let-7f-1-3j NM_0013643 MEF2C | 1 |
| hsa-miR-18a-1 NM_0013643 MEF2C   | 1 |
| hsa-miR-22-5j NM_0013643 MEF2C   | 1 |
| hsa-miR-23a-1 NM_0013643 MEF2C   | 1 |
| hsa-miR-23a-1 NM_0013643 MEF2C   | 1 |
| hsa-miR-25-5j NM_0013643 MEF2C   | 1 |
| hsa-miR-26b-1 NM_0013643 MEF2C   | 1 |
| hsa-miR-27a-1 NM_0013643 MEF2C   | 1 |
| hsa-miR-29a-1 NM_0013643 MEF2C   | 1 |
| hsa-miR-105-1 NM_0013643 MEF2C   | 1 |
| hsa-miR-105-1 NM_0013643 MEF2C   | 1 |
| hsa-miR-129-1 NM_0013643 MEF2C   | 1 |
| hsa-miR-30d-1 NM_0013643 MEF2C   | 1 |
| hsa-miR-183-1 NM_0013643 MEF2C   | 1 |
| hsa-miR-205-1 NM_0013643 MEF2C   | 1 |
| hsa-miR-210-1 NM_0013643 MEF2C   | 1 |
| hsa-miR-211-1 NM_0013643 MEF2C   | 1 |
| hsa-miR-214-1 NM_0013643 MEF2C   | 1 |
| hsa-miR-218-1 NM_0013643 MEF2C   | 1 |
| hsa-miR-221-1 NM_0013643 MEF2C   | 1 |
| hsa-miR-221-1 NM_0013643 MEF2C   | 1 |
| hsa-let-7g-3p NM_0013643 MEF2C   | 1 |
| hsa-let-7i-3p NM_0013643 MEF2C   | 1 |
| hsa-let-7i-3p NM_0013643 MEF2C   | 1 |
| hsa-miR-125b NM_0013643 MEF2C    | 1 |
| hsa-miR-132-1 NM_0013643 MEF2C   | 1 |
| hsa-miR-137-1 NM_0013643 MEF2C   | 1 |
| hsa-miR-144-1 NM_0013643 MEF2C   | 1 |
| hsa-miR-191-1 NM_0013643 MEF2C   | 1 |
| hsa-miR-191-1 NM_0013643 MEF2C   | 1 |
| hsa-miR-125a NM_0013643 MEF2C    | 1 |
| hsa-miR-127-1 NM_0013643 MEF2C   | 1 |
| hsa-miR-149-1 NM_0013643 MEF2C   | 1 |
| hsa-miR-154-1 NM_0013643 MEF2C   | 1 |
| hsa-miR-154-1 NM_0013643 MEF2C   | 1 |
| hsa-miR-185-1 NM_0013643 MEF2C   | 1 |
| hsa-miR-186-1 NM_0013643 MEF2C   | 1 |
| hsa-miR-188-1 NM_0013643 MEF2C   | 1 |
| hsa-miR-188-1 NM_0013643 MEF2C   | 1 |
| hsa-miR-320a NM_0013643 MEF2C    | 1 |
| hsa-miR-296-1 NM_0013643 MEF2C   | 1 |
| hsa-miR-296-1 NM_0013643 MEF2C   | 1 |
| hsa-miR-362-1 NM_0013643 MEF2C   | 1 |
| hsa-miR-302b NM_0013643 MEF2C    | 1 |
| hsa-miR-302b NM_0013643 MEF2C    | 1 |
| hsa-miR-370-1 NM_0013643 MEF2C   | 1 |
| hsa-miR-371a NM_0013643 MEF2C    | 1 |
| hsa-miR-372-1 NM_0013643 MEF2C   | 1 |
| hsa-miR-372-1 NM_0013643 MEF2C   | 1 |
| hsa-miR-376a NM_0013643 MEF2C    | 1 |
| hsa-miR-330-1 NM_0013643 MEF2C   | 1 |
| hsa-miR-328-1 NM_0013643 MEF2C   | 1 |
| hsa-miR-342-1 NM_0013643 MEF2C   | 1 |
| hsa-miR-148b NM_0013643 MEF2C    | 1 |
| hsa-miR-133b NM_0013643 MEF2C    | 1 |
| hsa-miR-425-1 NM_0013643 MEF2C   | 1 |
| hsa-miR-18b-1 NM_0013643 MEF2C   | 1 |
| hsa-miR-448-1 NM_0013643 MEF2C   | 1 |
| hsa-miR-329-1 NM_0013643 MEF2C   | 1 |
| hsa-miR-329-1 NM_0013643 MEF2C   | 1 |
| hsa-miR-409-1 NM_0013643 MEF2C   | 1 |
| hsa-miR-489-1 NM_0013643 MEF2C   | 1 |
| hsa-miR-489-1 NM_0013643 MEF2C   | 1 |



|              |            |       |   |
|--------------|------------|-------|---|
| hsa-miR-202- | NM_0013643 | MEF2C | 1 |
| hsa-miR-432- | NM_0013643 | MEF2C | 1 |
| hsa-miR-193b | NM_0013643 | MEF2C | 1 |
| hsa-miR-193b | NM_0013643 | MEF2C | 1 |
| hsa-miR-497- | NM_0013643 | MEF2C | 1 |
| hsa-miR-520e | NM_0013643 | MEF2C | 1 |
| hsa-miR-519e | NM_0013643 | MEF2C | 1 |
| hsa-miR-519e | NM_0013643 | MEF2C | 1 |
| hsa-miR-520a | NM_0013643 | MEF2C | 1 |
| hsa-miR-519d | NM_0013643 | MEF2C | 1 |
| hsa-miR-520g | NM_0013643 | MEF2C | 1 |
| hsa-miR-518a | NM_0013643 | MEF2C | 1 |
| hsa-miR-520h | NM_0013643 | MEF2C | 1 |
| hsa-miR-519a | NM_0013643 | MEF2C | 1 |
| hsa-miR-504- | NM_0013643 | MEF2C | 1 |
| hsa-miR-509- | NM_0013643 | MEF2C | 1 |
| hsa-miR-514a | NM_0013643 | MEF2C | 1 |
| hsa-miR-532- | NM_0013643 | MEF2C | 1 |
| hsa-miR-487b | NM_0013643 | MEF2C | 1 |
| hsa-miR-552- | NM_0013643 | MEF2C | 1 |
| hsa-miR-554  | NM_0013643 | MEF2C | 1 |
| hsa-miR-585- | NM_0013643 | MEF2C | 1 |
| hsa-miR-588  | NM_0013643 | MEF2C | 1 |
| hsa-miR-550a | NM_0013643 | MEF2C | 1 |
| hsa-miR-592  | NM_0013643 | MEF2C | 1 |
| hsa-miR-598- | NM_0013643 | MEF2C | 1 |
| hsa-miR-603  | NM_0013643 | MEF2C | 1 |
| hsa-miR-615- | NM_0013643 | MEF2C | 1 |
| hsa-miR-619- | NM_0013643 | MEF2C | 1 |
| hsa-miR-625- | NM_0013643 | MEF2C | 1 |
| hsa-miR-627- | NM_0013643 | MEF2C | 1 |
| hsa-miR-637  | NM_0013643 | MEF2C | 1 |
| hsa-miR-638  | NM_0013643 | MEF2C | 1 |
| hsa-miR-639  | NM_0013643 | MEF2C | 1 |
| hsa-miR-642a | NM_0013643 | MEF2C | 1 |
| hsa-miR-652- | NM_0013643 | MEF2C | 1 |
| hsa-miR-652- | NM_0013643 | MEF2C | 1 |
| hsa-miR-654- | NM_0013643 | MEF2C | 1 |
| hsa-miR-549a | NM_0013643 | MEF2C | 1 |
| hsa-miR-659- | NM_0013643 | MEF2C | 1 |
| hsa-miR-659- | NM_0013643 | MEF2C | 1 |
| hsa-miR-550a | NM_0013643 | MEF2C | 1 |
| hsa-miR-767- | NM_0013643 | MEF2C | 1 |
| hsa-miR-1224 | NM_0013643 | MEF2C | 1 |
| hsa-miR-320b | NM_0013643 | MEF2C | 1 |
| hsa-miR-1301 | NM_0013643 | MEF2C | 1 |
| hsa-miR-1283 | NM_0013643 | MEF2C | 1 |
| hsa-miR-766- | NM_0013643 | MEF2C | 1 |
| hsa-miR-670- | NM_0013643 | MEF2C | 1 |
| hsa-miR-2113 | NM_0013643 | MEF2C | 1 |
| hsa-miR-764  | NM_0013643 | MEF2C | 1 |
| hsa-miR-675- | NM_0013643 | MEF2C | 1 |
| hsa-miR-675- | NM_0013643 | MEF2C | 1 |
| hsa-miR-891a | NM_0013643 | MEF2C | 1 |
| hsa-miR-892b | NM_0013643 | MEF2C | 1 |
| hsa-miR-708- | NM_0013643 | MEF2C | 1 |
| hsa-miR-887- | NM_0013643 | MEF2C | 1 |
| hsa-miR-509- | NM_0013643 | MEF2C | 1 |
| hsa-miR-933  | NM_0013643 | MEF2C | 1 |
| hsa-miR-935  | NM_0013643 | MEF2C | 1 |
| hsa-miR-940  | NM_0013643 | MEF2C | 1 |
| hsa-miR-943  | NM_0013643 | MEF2C | 1 |
| hsa-miR-1178 | NM_0013643 | MEF2C | 1 |
| hsa-miR-1180 | NM_0013643 | MEF2C | 1 |
| hsa-miR-1182 | NM_0013643 | MEF2C | 1 |
| hsa-miR-1227 | NM_0013643 | MEF2C | 1 |
| hsa-miR-1229 | NM_0013643 | MEF2C | 1 |
| hsa-miR-1229 | NM_0013643 | MEF2C | 1 |
| hsa-miR-1233 | NM_0013643 | MEF2C | 1 |
| hsa-miR-1234 | NM_0013643 | MEF2C | 1 |
| hsa-miR-1204 | NM_0013643 | MEF2C | 1 |
| hsa-miR-1286 | NM_0013643 | MEF2C | 1 |
| hsa-miR-1287 | NM_0013643 | MEF2C | 1 |
| hsa-miR-1303 | NM_0013643 | MEF2C | 1 |
| hsa-miR-1247 | NM_0013643 | MEF2C | 1 |
| hsa-miR-1251 | NM_0013643 | MEF2C | 1 |
| hsa-miR-1275 | NM_0013643 | MEF2C | 1 |
| hsa-miR-1281 | NM_0013643 | MEF2C | 1 |
| hsa-miR-1292 | NM_0013643 | MEF2C | 1 |
| hsa-miR-1292 | NM_0013643 | MEF2C | 1 |
| hsa-miR-1470 | NM_0013643 | MEF2C | 1 |
| hsa-miR-103b | NM_0013643 | MEF2C | 1 |
| hsa-miR-1825 | NM_0013643 | MEF2C | 1 |
| hsa-miR-1908 | NM_0013643 | MEF2C | 1 |
| hsa-miR-1911 | NM_0013643 | MEF2C | 1 |
| hsa-miR-1912 | NM_0013643 | MEF2C | 1 |
| hsa-miR-2116 | NM_0013643 | MEF2C | 1 |
| hsa-miR-2276 | NM_0013643 | MEF2C | 1 |
| hsa-miR-2277 | NM_0013643 | MEF2C | 1 |
| hsa-miR-2681 | NM_0013643 | MEF2C | 1 |
| hsa-miR-718  | NM_0013643 | MEF2C | 1 |
| hsa-miR-3121 | NM_0013643 | MEF2C | 1 |
| hsa-miR-3124 | NM_0013643 | MEF2C | 1 |
| hsa-miR-3127 | NM_0013643 | MEF2C | 1 |







|                |            |       |   |
|----------------|------------|-------|---|
| hsa-miR-8083   | NM_0013643 | MEF2C | 1 |
| hsa-miR-8485   | NM_0013643 | MEF2C | 1 |
| hsa-miR-1039   | NM_0013643 | MEF2C | 1 |
| hsa-miR-104C   | NM_0013643 | MEF2C | 1 |
| hsa-miR-1118   | NM_0013643 | MEF2C | 1 |
| hsa-miR-1139   | NM_0013643 | MEF2C | 1 |
| hsa-miR-3059   | NM_0013643 | MEF2C | 1 |
| hsa-miR-3059   | NM_0013643 | MEF2C | 1 |
| hsa-miR-3085   | NM_0013643 | MEF2C | 1 |
| hsa-miR-3085   | NM_0013643 | MEF2C | 1 |
| hsa-miR-6529   | NM_0013643 | MEF2C | 1 |
| hsa-miR-1211   | NM_0013643 | MEF2C | 1 |
| hsa-miR-1212   | NM_0013643 | MEF2C | 1 |
| hsa-let-7a-2-3 | NM_0013643 | MEF2C | 1 |
| hsa-let-7a-2-3 | NM_0013643 | MEF2C | 1 |
| hsa-let-7c-3p  | NM_0013643 | MEF2C | 1 |
| hsa-let-7e-3p  | NM_0013643 | MEF2C | 1 |
| hsa-let-7e-3p  | NM_0013643 | MEF2C | 1 |
| hsa-miR-17-5j  | NM_0013643 | MEF2C | 1 |
| hsa-miR-22-5j  | NM_0013643 | MEF2C | 1 |
| hsa-miR-23a-   | NM_0013643 | MEF2C | 1 |
| hsa-miR-27a-   | NM_0013643 | MEF2C | 1 |
| hsa-miR-29a-   | NM_0013643 | MEF2C | 1 |
| hsa-miR-106a   | NM_0013643 | MEF2C | 1 |
| hsa-miR-197-   | NM_0013643 | MEF2C | 1 |
| hsa-miR-129-   | NM_0013643 | MEF2C | 1 |
| hsa-miR-129-   | NM_0013643 | MEF2C | 1 |
| hsa-miR-30d-   | NM_0013643 | MEF2C | 1 |
| hsa-miR-147a   | NM_0013643 | MEF2C | 1 |
| hsa-miR-10b-   | NM_0013643 | MEF2C | 1 |
| hsa-miR-205-   | NM_0013643 | MEF2C | 1 |
| hsa-miR-210-   | NM_0013643 | MEF2C | 1 |
| hsa-miR-211-   | NM_0013643 | MEF2C | 1 |
| hsa-miR-211-   | NM_0013643 | MEF2C | 1 |
| hsa-miR-221-   | NM_0013643 | MEF2C | 1 |
| hsa-miR-222-   | NM_0013643 | MEF2C | 1 |
| hsa-let-7g-3p  | NM_0013643 | MEF2C | 1 |
| hsa-let-7i-3p  | NM_0013643 | MEF2C | 1 |
| hsa-miR-23b-   | NM_0013643 | MEF2C | 1 |
| hsa-miR-125b   | NM_0013643 | MEF2C | 1 |
| hsa-miR-137-   | NM_0013643 | MEF2C | 1 |
| hsa-miR-140-   | NM_0013643 | MEF2C | 1 |
| hsa-miR-142-   | NM_0013643 | MEF2C | 1 |
| hsa-miR-191-   | NM_0013643 | MEF2C | 1 |
| hsa-miR-125a   | NM_0013643 | MEF2C | 1 |
| hsa-miR-127-   | NM_0013643 | MEF2C | 1 |
| hsa-miR-129-   | NM_0013643 | MEF2C | 1 |
| hsa-miR-149-   | NM_0013643 | MEF2C | 1 |
| hsa-miR-154-   | NM_0013643 | MEF2C | 1 |
| hsa-miR-186-   | NM_0013643 | MEF2C | 1 |
| hsa-miR-188-   | NM_0013643 | MEF2C | 1 |
| hsa-miR-320a   | NM_0013643 | MEF2C | 1 |
| hsa-miR-128-   | NM_0013643 | MEF2C | 1 |
| hsa-miR-296-   | NM_0013643 | MEF2C | 1 |
| hsa-miR-26a-   | NM_0013643 | MEF2C | 1 |
| hsa-miR-302b   | NM_0013643 | MEF2C | 1 |
| hsa-miR-370-   | NM_0013643 | MEF2C | 1 |
| hsa-miR-371a   | NM_0013643 | MEF2C | 1 |
| hsa-miR-372-   | NM_0013643 | MEF2C | 1 |
| hsa-miR-376a   | NM_0013643 | MEF2C | 1 |
| hsa-miR-330-   | NM_0013643 | MEF2C | 1 |
| hsa-miR-328-   | NM_0013643 | MEF2C | 1 |
| hsa-miR-328-   | NM_0013643 | MEF2C | 1 |
| hsa-miR-328-   | NM_0013643 | MEF2C | 1 |
| hsa-miR-342-   | NM_0013643 | MEF2C | 1 |
| hsa-miR-148b   | NM_0013643 | MEF2C | 1 |
| hsa-miR-324-   | NM_0013643 | MEF2C | 1 |
| hsa-miR-133b   | NM_0013643 | MEF2C | 1 |
| hsa-miR-325    | NM_0013643 | MEF2C | 1 |
| hsa-miR-448    | NM_0013643 | MEF2C | 1 |
| hsa-miR-329-   | NM_0013643 | MEF2C | 1 |
| hsa-miR-329-   | NM_0013643 | MEF2C | 1 |
| hsa-miR-409-   | NM_0013643 | MEF2C | 1 |
| hsa-miR-489-   | NM_0013643 | MEF2C | 1 |
| hsa-miR-492    | NM_0013643 | MEF2C | 1 |
| hsa-miR-494-   | NM_0013643 | MEF2C | 1 |
| hsa-miR-193b   | NM_0013643 | MEF2C | 1 |
| hsa-miR-193b   | NM_0013643 | MEF2C | 1 |
| hsa-miR-519e   | NM_0013643 | MEF2C | 1 |
| hsa-miR-520a   | NM_0013643 | MEF2C | 1 |
| hsa-miR-523-   | NM_0013643 | MEF2C | 1 |
| hsa-miR-518c   | NM_0013643 | MEF2C | 1 |
| hsa-miR-518c   | NM_0013643 | MEF2C | 1 |
| hsa-miR-524-   | NM_0013643 | MEF2C | 1 |
| hsa-miR-519d   | NM_0013643 | MEF2C | 1 |
| hsa-miR-520g   | NM_0013643 | MEF2C | 1 |
| hsa-miR-520h   | NM_0013643 | MEF2C | 1 |
| hsa-miR-509-   | NM_0013643 | MEF2C | 1 |
| hsa-miR-514a   | NM_0013643 | MEF2C | 1 |
| hsa-miR-487b   | NM_0013643 | MEF2C | 1 |
| hsa-miR-552-   | NM_0013643 | MEF2C | 1 |
| hsa-miR-573    | NM_0013643 | MEF2C | 1 |
| hsa-miR-580-   | NM_0013643 | MEF2C | 1 |
| hsa-miR-585-   | NM_0013643 | MEF2C | 1 |

|              |             |       |   |
|--------------|-------------|-------|---|
| hsa-miR-588  | NM_0013643  | MEF2C | 1 |
| hsa-miR-550a | NM_0013643  | MEF2C | 1 |
| hsa-miR-597  | -NM_0013643 | MEF2C | 1 |
| hsa-miR-603  | NM_0013643  | MEF2C | 1 |
| hsa-miR-612  | NM_0013643  | MEF2C | 1 |
| hsa-miR-618  | NM_0013643  | MEF2C | 1 |
| hsa-miR-625  | -NM_0013643 | MEF2C | 1 |
| hsa-miR-33b  | -NM_0013643 | MEF2C | 1 |
| hsa-miR-642a | NM_0013643  | MEF2C | 1 |
| hsa-miR-642a | NM_0013643  | MEF2C | 1 |
| hsa-miR-645  | NM_0013643  | MEF2C | 1 |
| hsa-miR-645  | NM_0013643  | MEF2C | 1 |
| hsa-miR-646  | NM_0013643  | MEF2C | 1 |
| hsa-miR-650  | NM_0013643  | MEF2C | 1 |
| hsa-miR-652  | -NM_0013643 | MEF2C | 1 |
| hsa-miR-659  | -NM_0013643 | MEF2C | 1 |
| hsa-miR-659  | -NM_0013643 | MEF2C | 1 |
| hsa-miR-767  | -NM_0013643 | MEF2C | 1 |
| hsa-miR-1224 | NM_0013643  | MEF2C | 1 |
| hsa-miR-320t | NM_0013643  | MEF2C | 1 |
| hsa-miR-1296 | NM_0013643  | MEF2C | 1 |
| hsa-miR-1271 | NM_0013643  | MEF2C | 1 |
| hsa-miR-449c | NM_0013643  | MEF2C | 1 |
| hsa-miR-769  | -NM_0013643 | MEF2C | 1 |
| hsa-miR-766  | -NM_0013643 | MEF2C | 1 |
| hsa-miR-765  | NM_0013643  | MEF2C | 1 |
| hsa-miR-891a | NM_0013643  | MEF2C | 1 |
| hsa-miR-875  | -NM_0013643 | MEF2C | 1 |
| hsa-miR-887  | -NM_0013643 | MEF2C | 1 |
| hsa-miR-873  | -NM_0013643 | MEF2C | 1 |
| hsa-miR-873  | -NM_0013643 | MEF2C | 1 |
| hsa-miR-933  | NM_0013643  | MEF2C | 1 |
| hsa-miR-935  | NM_0013643  | MEF2C | 1 |
| hsa-miR-940  | NM_0013643  | MEF2C | 1 |
| hsa-miR-1178 | NM_0013643  | MEF2C | 1 |
| hsa-miR-1180 | NM_0013643  | MEF2C | 1 |
| hsa-miR-1227 | NM_0013643  | MEF2C | 1 |
| hsa-miR-1227 | NM_0013643  | MEF2C | 1 |
| hsa-miR-1229 | NM_0013643  | MEF2C | 1 |
| hsa-miR-1233 | NM_0013643  | MEF2C | 1 |
| hsa-miR-1233 | NM_0013643  | MEF2C | 1 |
| hsa-miR-1236 | NM_0013643  | MEF2C | 1 |
| hsa-miR-1238 | NM_0013643  | MEF2C | 1 |
| hsa-miR-1204 | NM_0013643  | MEF2C | 1 |
| hsa-miR-1286 | NM_0013643  | MEF2C | 1 |
| hsa-miR-1287 | NM_0013643  | MEF2C | 1 |
| hsa-miR-1303 | NM_0013643  | MEF2C | 1 |
| hsa-miR-1247 | NM_0013643  | MEF2C | 1 |
| hsa-miR-1253 | NM_0013643  | MEF2C | 1 |
| hsa-miR-1263 | NM_0013643  | MEF2C | 1 |
| hsa-miR-1265 | NM_0013643  | MEF2C | 1 |
| hsa-miR-1266 | NM_0013643  | MEF2C | 1 |
| hsa-miR-1281 | NM_0013643  | MEF2C | 1 |
| hsa-miR-1470 | NM_0013643  | MEF2C | 1 |
| hsa-miR-103t | NM_0013643  | MEF2C | 1 |
| hsa-miR-1825 | NM_0013643  | MEF2C | 1 |
| hsa-miR-1908 | NM_0013643  | MEF2C | 1 |
| hsa-miR-1912 | NM_0013643  | MEF2C | 1 |
| hsa-miR-1914 | NM_0013643  | MEF2C | 1 |
| hsa-miR-2116 | NM_0013643  | MEF2C | 1 |
| hsa-miR-2277 | NM_0013643  | MEF2C | 1 |
| hsa-miR-2681 | NM_0013643  | MEF2C | 1 |
| hsa-miR-718  | NM_0013643  | MEF2C | 1 |
| hsa-miR-3121 | NM_0013643  | MEF2C | 1 |
| hsa-miR-3122 | NM_0013643  | MEF2C | 1 |
| hsa-miR-3126 | NM_0013643  | MEF2C | 1 |
| hsa-miR-3126 | NM_0013643  | MEF2C | 1 |
| hsa-miR-3127 | NM_0013643  | MEF2C | 1 |
| hsa-miR-466  | NM_0013643  | MEF2C | 1 |
| hsa-miR-3136 | NM_0013643  | MEF2C | 1 |
| hsa-miR-544t | NM_0013643  | MEF2C | 1 |
| hsa-miR-3140 | NM_0013643  | MEF2C | 1 |
| hsa-miR-3145 | NM_0013643  | MEF2C | 1 |
| hsa-miR-3149 | NM_0013643  | MEF2C | 1 |
| hsa-miR-3151 | NM_0013643  | MEF2C | 1 |
| hsa-miR-3151 | NM_0013643  | MEF2C | 1 |
| hsa-miR-3158 | NM_0013643  | MEF2C | 1 |
| hsa-miR-3158 | NM_0013643  | MEF2C | 1 |
| hsa-miR-3162 | NM_0013643  | MEF2C | 1 |
| hsa-miR-3162 | NM_0013643  | MEF2C | 1 |
| hsa-miR-3162 | NM_0013643  | MEF2C | 1 |
| hsa-miR-1260 | NM_0013643  | MEF2C | 1 |
| hsa-miR-3170 | NM_0013643  | MEF2C | 1 |
| hsa-miR-3173 | NM_0013643  | MEF2C | 1 |
| hsa-miR-3175 | NM_0013643  | MEF2C | 1 |
| hsa-miR-3176 | NM_0013643  | MEF2C | 1 |
| hsa-miR-3186 | NM_0013643  | MEF2C | 1 |
| hsa-miR-3192 | NM_0013643  | MEF2C | 1 |
| hsa-miR-3194 | NM_0013643  | MEF2C | 1 |
| hsa-miR-4297 | NM_0013643  | MEF2C | 1 |
| hsa-miR-4299 | NM_0013643  | MEF2C | 1 |
| hsa-miR-4312 | NM_0013643  | MEF2C | 1 |
| hsa-miR-4313 | NM_0013643  | MEF2C | 1 |
| hsa-miR-4323 | NM_0013643  | MEF2C | 1 |









|                |            |       |   |
|----------------|------------|-------|---|
| hsa-miR-1213   | NM_0013643 | MEF2C | 1 |
| hsa-let-7a-2-3 | NM_0011310 | MEF2C | 1 |
| hsa-let-7a-2-3 | NM_0011310 | MEF2C | 1 |
| hsa-let-7e-3p  | NM_0011310 | MEF2C | 1 |
| hsa-let-7e-3p  | NM_0011310 | MEF2C | 1 |
| hsa-miR-17-5j  | NM_0011310 | MEF2C | 1 |
| hsa-miR-19b-   | NM_0011310 | MEF2C | 1 |
| hsa-miR-22-5j  | NM_0011310 | MEF2C | 1 |
| hsa-miR-23a-   | NM_0011310 | MEF2C | 1 |
| hsa-miR-29a-   | NM_0011310 | MEF2C | 1 |
| hsa-miR-105-   | NM_0011310 | MEF2C | 1 |
| hsa-miR-106a   | NM_0011310 | MEF2C | 1 |
| hsa-miR-129-   | NM_0011310 | MEF2C | 1 |
| hsa-miR-30d-   | NM_0011310 | MEF2C | 1 |
| hsa-miR-147a   | NM_0011310 | MEF2C | 1 |
| hsa-miR-10b-   | NM_0011310 | MEF2C | 1 |
| hsa-miR-183-   | NM_0011310 | MEF2C | 1 |
| hsa-miR-205-   | NM_0011310 | MEF2C | 1 |
| hsa-miR-210-   | NM_0011310 | MEF2C | 1 |
| hsa-miR-211-   | NM_0011310 | MEF2C | 1 |
| hsa-miR-211-   | NM_0011310 | MEF2C | 1 |
| hsa-miR-214-   | NM_0011310 | MEF2C | 1 |
| hsa-miR-218-   | NM_0011310 | MEF2C | 1 |
| hsa-miR-221-   | NM_0011310 | MEF2C | 1 |
| hsa-miR-221-   | NM_0011310 | MEF2C | 1 |
| hsa-let-7g-3p  | NM_0011310 | MEF2C | 1 |
| hsa-let-7i-3p  | NM_0011310 | MEF2C | 1 |
| hsa-miR-125t   | NM_0011310 | MEF2C | 1 |
| hsa-miR-128-   | NM_0011310 | MEF2C | 1 |
| hsa-miR-137-   | NM_0011310 | MEF2C | 1 |
| hsa-miR-191-   | NM_0011310 | MEF2C | 1 |
| hsa-miR-125a   | NM_0011310 | MEF2C | 1 |
| hsa-miR-127-   | NM_0011310 | MEF2C | 1 |
| hsa-miR-149-   | NM_0011310 | MEF2C | 1 |
| hsa-miR-154-   | NM_0011310 | MEF2C | 1 |
| hsa-miR-188-   | NM_0011310 | MEF2C | 1 |
| hsa-miR-194-   | NM_0011310 | MEF2C | 1 |
| hsa-miR-370-   | NM_0011310 | MEF2C | 1 |
| hsa-miR-371a   | NM_0011310 | MEF2C | 1 |
| hsa-miR-376a   | NM_0011310 | MEF2C | 1 |
| hsa-miR-378a   | NM_0011310 | MEF2C | 1 |
| hsa-miR-328-   | NM_0011310 | MEF2C | 1 |
| hsa-miR-326    | NM_0011310 | MEF2C | 1 |
| hsa-miR-148t   | NM_0011310 | MEF2C | 1 |
| hsa-miR-325    | NM_0011310 | MEF2C | 1 |
| hsa-miR-424-   | NM_0011310 | MEF2C | 1 |
| hsa-miR-18b-   | NM_0011310 | MEF2C | 1 |
| hsa-miR-329-   | NM_0011310 | MEF2C | 1 |
| hsa-miR-409-   | NM_0011310 | MEF2C | 1 |
| hsa-miR-489-   | NM_0011310 | MEF2C | 1 |
| hsa-miR-492    | NM_0011310 | MEF2C | 1 |
| hsa-miR-193t   | NM_0011310 | MEF2C | 1 |
| hsa-miR-193t   | NM_0011310 | MEF2C | 1 |
| hsa-miR-520e   | NM_0011310 | MEF2C | 1 |
| hsa-miR-520e   | NM_0011310 | MEF2C | 1 |
| hsa-miR-519e   | NM_0011310 | MEF2C | 1 |
| hsa-miR-520a   | NM_0011310 | MEF2C | 1 |
| hsa-miR-523-   | NM_0011310 | MEF2C | 1 |
| hsa-miR-519d   | NM_0011310 | MEF2C | 1 |
| hsa-miR-520g   | NM_0011310 | MEF2C | 1 |
| hsa-miR-520h   | NM_0011310 | MEF2C | 1 |
| hsa-miR-509-   | NM_0011310 | MEF2C | 1 |
| hsa-miR-514a   | NM_0011310 | MEF2C | 1 |
| hsa-miR-455-   | NM_0011310 | MEF2C | 1 |
| hsa-miR-487t   | NM_0011310 | MEF2C | 1 |
| hsa-miR-551a   | NM_0011310 | MEF2C | 1 |
| hsa-miR-552-   | NM_0011310 | MEF2C | 1 |
| hsa-miR-554    | NM_0011310 | MEF2C | 1 |
| hsa-miR-557    | NM_0011310 | MEF2C | 1 |
| hsa-miR-585-   | NM_0011310 | MEF2C | 1 |
| hsa-miR-588    | NM_0011310 | MEF2C | 1 |
| hsa-miR-550a   | NM_0011310 | MEF2C | 1 |
| hsa-miR-603    | NM_0011310 | MEF2C | 1 |
| hsa-miR-615-   | NM_0011310 | MEF2C | 1 |
| hsa-miR-618    | NM_0011310 | MEF2C | 1 |
| hsa-miR-619-   | NM_0011310 | MEF2C | 1 |
| hsa-miR-625-   | NM_0011310 | MEF2C | 1 |
| hsa-miR-627-   | NM_0011310 | MEF2C | 1 |
| hsa-miR-627-   | NM_0011310 | MEF2C | 1 |
| hsa-miR-638    | NM_0011310 | MEF2C | 1 |
| hsa-miR-640    | NM_0011310 | MEF2C | 1 |
| hsa-miR-642a   | NM_0011310 | MEF2C | 1 |
| hsa-miR-646    | NM_0011310 | MEF2C | 1 |
| hsa-miR-654-   | NM_0011310 | MEF2C | 1 |
| hsa-miR-549a   | NM_0011310 | MEF2C | 1 |
| hsa-miR-659-   | NM_0011310 | MEF2C | 1 |
| hsa-miR-767-   | NM_0011310 | MEF2C | 1 |
| hsa-miR-769-   | NM_0011310 | MEF2C | 1 |
| hsa-miR-764    | NM_0011310 | MEF2C | 1 |
| hsa-miR-765    | NM_0011310 | MEF2C | 1 |
| hsa-miR-765    | NM_0011310 | MEF2C | 1 |
| hsa-miR-675-   | NM_0011310 | MEF2C | 1 |
| hsa-miR-891a   | NM_0011310 | MEF2C | 1 |
| hsa-miR-891a   | NM_0011310 | MEF2C | 1 |

|                               |   |
|-------------------------------|---|
| hsa-miR-892b NM_0011310 MEF2C | 1 |
| hsa-miR-708- NM_0011310 MEF2C | 1 |
| hsa-miR-887- NM_0011310 MEF2C | 1 |
| hsa-miR-509- NM_0011310 MEF2C | 1 |
| hsa-miR-933 NM_0011310 MEF2C  | 1 |
| hsa-miR-935 NM_0011310 MEF2C  | 1 |
| hsa-miR-937- NM_0011310 MEF2C | 1 |
| hsa-miR-940 NM_0011310 MEF2C  | 1 |
| hsa-miR-1178 NM_0011310 MEF2C | 1 |
| hsa-miR-1180 NM_0011310 MEF2C | 1 |
| hsa-miR-1225 NM_0011310 MEF2C | 1 |
| hsa-miR-1227 NM_0011310 MEF2C | 1 |
| hsa-miR-1233 NM_0011310 MEF2C | 1 |
| hsa-miR-1234 NM_0011310 MEF2C | 1 |
| hsa-miR-1204 NM_0011310 MEF2C | 1 |
| hsa-miR-1287 NM_0011310 MEF2C | 1 |
| hsa-miR-1303 NM_0011310 MEF2C | 1 |
| hsa-miR-1245 NM_0011310 MEF2C | 1 |
| hsa-miR-1247 NM_0011310 MEF2C | 1 |
| hsa-miR-1253 NM_0011310 MEF2C | 1 |
| hsa-miR-1265 NM_0011310 MEF2C | 1 |
| hsa-miR-1292 NM_0011310 MEF2C | 1 |
| hsa-miR-1292 NM_0011310 MEF2C | 1 |
| hsa-miR-1470 NM_0011310 MEF2C | 1 |
| hsa-miR-1471 NM_0011310 MEF2C | 1 |
| hsa-miR-103b NM_0011310 MEF2C | 1 |
| hsa-miR-1908 NM_0011310 MEF2C | 1 |
| hsa-miR-1912 NM_0011310 MEF2C | 1 |
| hsa-miR-1913 NM_0011310 MEF2C | 1 |
| hsa-miR-1972 NM_0011310 MEF2C | 1 |
| hsa-miR-1973 NM_0011310 MEF2C | 1 |
| hsa-miR-2277 NM_0011310 MEF2C | 1 |
| hsa-miR-711 NM_0011310 MEF2C  | 1 |
| hsa-miR-718 NM_0011310 MEF2C  | 1 |
| hsa-miR-718 NM_0011310 MEF2C  | 1 |
| hsa-miR-3121 NM_0011310 MEF2C | 1 |
| hsa-miR-3125 NM_0011310 MEF2C | 1 |
| hsa-miR-3126 NM_0011310 MEF2C | 1 |
| hsa-miR-3127 NM_0011310 MEF2C | 1 |
| hsa-miR-466 NM_0011310 MEF2C  | 1 |
| hsa-miR-544b NM_0011310 MEF2C | 1 |
| hsa-miR-3140 NM_0011310 MEF2C | 1 |
| hsa-miR-3145 NM_0011310 MEF2C | 1 |
| hsa-miR-3151 NM_0011310 MEF2C | 1 |
| hsa-miR-3151 NM_0011310 MEF2C | 1 |
| hsa-miR-3158 NM_0011310 MEF2C | 1 |
| hsa-miR-3162 NM_0011310 MEF2C | 1 |
| hsa-miR-3162 NM_0011310 MEF2C | 1 |
| hsa-miR-3166 NM_0011310 MEF2C | 1 |
| hsa-miR-3170 NM_0011310 MEF2C | 1 |
| hsa-miR-3173 NM_0011310 MEF2C | 1 |
| hsa-miR-3174 NM_0011310 MEF2C | 1 |
| hsa-miR-3176 NM_0011310 MEF2C | 1 |
| hsa-miR-3194 NM_0011310 MEF2C | 1 |
| hsa-miR-4260 NM_0011310 MEF2C | 1 |
| hsa-miR-4260 NM_0011310 MEF2C | 1 |
| hsa-miR-4261 NM_0011310 MEF2C | 1 |
| hsa-miR-4281 NM_0011310 MEF2C | 1 |
| hsa-miR-4275 NM_0011310 MEF2C | 1 |
| hsa-miR-4286 NM_0011310 MEF2C | 1 |
| hsa-miR-3610 NM_0011310 MEF2C | 1 |
| hsa-miR-3615 NM_0011310 MEF2C | 1 |
| hsa-miR-3621 NM_0011310 MEF2C | 1 |
| hsa-miR-3622 NM_0011310 MEF2C | 1 |
| hsa-miR-3622 NM_0011310 MEF2C | 1 |
| hsa-miR-3650 NM_0011310 MEF2C | 1 |
| hsa-miR-3677 NM_0011310 MEF2C | 1 |
| hsa-miR-3685 NM_0011310 MEF2C | 1 |
| hsa-miR-3688 NM_0011310 MEF2C | 1 |
| hsa-miR-3688 NM_0011310 MEF2C | 1 |
| hsa-miR-3690 NM_0011310 MEF2C | 1 |
| hsa-miR-3692 NM_0011310 MEF2C | 1 |
| hsa-miR-3908 NM_0011310 MEF2C | 1 |
| hsa-miR-3916 NM_0011310 MEF2C | 1 |
| hsa-miR-3936 NM_0011310 MEF2C | 1 |
| hsa-miR-3940 NM_0011310 MEF2C | 1 |
| hsa-miR-3943 NM_0011310 MEF2C | 1 |
| hsa-miR-3944 NM_0011310 MEF2C | 1 |
| hsa-miR-3945 NM_0011310 MEF2C | 1 |
| hsa-miR-642b NM_0011310 MEF2C | 1 |
| hsa-miR-550b NM_0011310 MEF2C | 1 |
| hsa-miR-4425 NM_0011310 MEF2C | 1 |
| hsa-miR-4435 NM_0011310 MEF2C | 1 |
| hsa-miR-4446 NM_0011310 MEF2C | 1 |
| hsa-miR-4454 NM_0011310 MEF2C | 1 |
| hsa-miR-2392 NM_0011310 MEF2C | 1 |
| hsa-miR-4521 NM_0011310 MEF2C | 1 |
| hsa-miR-4525 NM_0011310 MEF2C | 1 |
| hsa-miR-4536 NM_0011310 MEF2C | 1 |
| hsa-miR-3978 NM_0011310 MEF2C | 1 |
| hsa-miR-4642 NM_0011310 MEF2C | 1 |
| hsa-miR-4646 NM_0011310 MEF2C | 1 |
| hsa-miR-4655 NM_0011310 MEF2C | 1 |
| hsa-miR-4667 NM_0011310 MEF2C | 1 |



|                                 |   |
|---------------------------------|---|
| hsa-miR-6777 NM_0011310 MEF2C   | 1 |
| hsa-miR-6785 NM_0011310 MEF2C   | 1 |
| hsa-miR-6786 NM_0011310 MEF2C   | 1 |
| hsa-miR-6786 NM_0011310 MEF2C   | 1 |
| hsa-miR-6787 NM_0011310 MEF2C   | 1 |
| hsa-miR-6793 NM_0011310 MEF2C   | 1 |
| hsa-miR-6795 NM_0011310 MEF2C   | 1 |
| hsa-miR-6796 NM_0011310 MEF2C   | 1 |
| hsa-miR-6797 NM_0011310 MEF2C   | 1 |
| hsa-miR-6798 NM_0011310 MEF2C   | 1 |
| hsa-miR-6798 NM_0011310 MEF2C   | 1 |
| hsa-miR-6802 NM_0011310 MEF2C   | 1 |
| hsa-miR-6802 NM_0011310 MEF2C   | 1 |
| hsa-miR-6804 NM_0011310 MEF2C   | 1 |
| hsa-miR-6812 NM_0011310 MEF2C   | 1 |
| hsa-miR-6813 NM_0011310 MEF2C   | 1 |
| hsa-miR-6817 NM_0011310 MEF2C   | 1 |
| hsa-miR-6817 NM_0011310 MEF2C   | 1 |
| hsa-miR-6827 NM_0011310 MEF2C   | 1 |
| hsa-miR-6832 NM_0011310 MEF2C   | 1 |
| hsa-miR-6780 NM_0011310 MEF2C   | 1 |
| hsa-miR-6846 NM_0011310 MEF2C   | 1 |
| hsa-miR-6850 NM_0011310 MEF2C   | 1 |
| hsa-miR-6851 NM_0011310 MEF2C   | 1 |
| hsa-miR-6854 NM_0011310 MEF2C   | 1 |
| hsa-miR-6855 NM_0011310 MEF2C   | 1 |
| hsa-miR-6861 NM_0011310 MEF2C   | 1 |
| hsa-miR-6864 NM_0011310 MEF2C   | 1 |
| hsa-miR-6865 NM_0011310 MEF2C   | 1 |
| hsa-miR-6865 NM_0011310 MEF2C   | 1 |
| hsa-miR-6867 NM_0011310 MEF2C   | 1 |
| hsa-miR-6876 NM_0011310 MEF2C   | 1 |
| hsa-miR-6877 NM_0011310 MEF2C   | 1 |
| hsa-miR-6879 NM_0011310 MEF2C   | 1 |
| hsa-miR-6882 NM_0011310 MEF2C   | 1 |
| hsa-miR-6885 NM_0011310 MEF2C   | 1 |
| hsa-miR-6887 NM_0011310 MEF2C   | 1 |
| hsa-miR-6887 NM_0011310 MEF2C   | 1 |
| hsa-miR-6888 NM_0011310 MEF2C   | 1 |
| hsa-miR-6891 NM_0011310 MEF2C   | 1 |
| hsa-miR-6893 NM_0011310 MEF2C   | 1 |
| hsa-miR-7109 NM_0011310 MEF2C   | 1 |
| hsa-miR-7110 NM_0011310 MEF2C   | 1 |
| hsa-miR-7111 NM_0011310 MEF2C   | 1 |
| hsa-miR-7113 NM_0011310 MEF2C   | 1 |
| hsa-miR-7114 NM_0011310 MEF2C   | 1 |
| hsa-miR-7151 NM_0011310 MEF2C   | 1 |
| hsa-miR-7157 NM_0011310 MEF2C   | 1 |
| hsa-miR-7162 NM_0011310 MEF2C   | 1 |
| hsa-miR-7703 NM_0011310 MEF2C   | 1 |
| hsa-miR-1273 NM_0011310 MEF2C   | 1 |
| hsa-miR-1273 NM_0011310 MEF2C   | 1 |
| hsa-miR-7848 NM_0011310 MEF2C   | 1 |
| hsa-miR-7849 NM_0011310 MEF2C   | 1 |
| hsa-miR-7978 NM_0011310 MEF2C   | 1 |
| hsa-miR-8057 NM_0011310 MEF2C   | 1 |
| hsa-miR-8058 NM_0011310 MEF2C   | 1 |
| hsa-miR-8059 NM_0011310 MEF2C   | 1 |
| hsa-miR-8070 NM_0011310 MEF2C   | 1 |
| hsa-miR-8088 NM_0011310 MEF2C   | 1 |
| hsa-miR-8485 NM_0011310 MEF2C   | 1 |
| hsa-miR-1040 NM_0011310 MEF2C   | 1 |
| hsa-miR-1118 NM_0011310 MEF2C   | 1 |
| hsa-miR-1140 NM_0011310 MEF2C   | 1 |
| hsa-miR-3059 NM_0011310 MEF2C   | 1 |
| hsa-miR-3059 NM_0011310 MEF2C   | 1 |
| hsa-miR-3085 NM_0011310 MEF2C   | 1 |
| hsa-miR-3085 NM_0011310 MEF2C   | 1 |
| hsa-miR-1211 NM_0011310 MEF2C   | 1 |
| hsa-miR-1212 NM_0011310 MEF2C   | 1 |
| hsa-let-7a-2-3 NM_0011933 MEF2C | 1 |
| hsa-let-7e-3p NM_0011933 MEF2C  | 1 |
| hsa-let-7e-3p NM_0011933 MEF2C  | 1 |
| hsa-miR-17-5j NM_0011933 MEF2C  | 1 |
| hsa-miR-23a-1 NM_0011933 MEF2C  | 1 |
| hsa-miR-29a-1 NM_0011933 MEF2C  | 1 |
| hsa-miR-105-1 NM_0011933 MEF2C  | 1 |
| hsa-miR-106a NM_0011933 MEF2C   | 1 |
| hsa-miR-30d-1 NM_0011933 MEF2C  | 1 |
| hsa-miR-10b-1 NM_0011933 MEF2C  | 1 |
| hsa-miR-183-1 NM_0011933 MEF2C  | 1 |
| hsa-miR-211-1 NM_0011933 MEF2C  | 1 |
| hsa-miR-211-1 NM_0011933 MEF2C  | 1 |
| hsa-miR-214-1 NM_0011933 MEF2C  | 1 |
| hsa-miR-218-1 NM_0011933 MEF2C  | 1 |
| hsa-miR-221-1 NM_0011933 MEF2C  | 1 |
| hsa-miR-221-1 NM_0011933 MEF2C  | 1 |
| hsa-let-7g-3p NM_0011933 MEF2C  | 1 |
| hsa-let-7i-3p NM_0011933 MEF2C  | 1 |
| hsa-miR-128-1 NM_0011933 MEF2C  | 1 |
| hsa-miR-137-1 NM_0011933 MEF2C  | 1 |
| hsa-miR-191-1 NM_0011933 MEF2C  | 1 |
| hsa-miR-125a NM_0011933 MEF2C   | 1 |
| hsa-miR-125a NM_0011933 MEF2C   | 1 |

|              |            |       |   |
|--------------|------------|-------|---|
| hsa-miR-149- | NM_0011933 | MEF2C | 1 |
| hsa-miR-154- | NM_0011933 | MEF2C | 1 |
| hsa-miR-194- | NM_0011933 | MEF2C | 1 |
| hsa-miR-302b | NM_0011933 | MEF2C | 1 |
| hsa-miR-370- | NM_0011933 | MEF2C | 1 |
| hsa-miR-371a | NM_0011933 | MEF2C | 1 |
| hsa-miR-376a | NM_0011933 | MEF2C | 1 |
| hsa-miR-378a | NM_0011933 | MEF2C | 1 |
| hsa-miR-328- | NM_0011933 | MEF2C | 1 |
| hsa-miR-326  | NM_0011933 | MEF2C | 1 |
| hsa-miR-148b | NM_0011933 | MEF2C | 1 |
| hsa-miR-133b | NM_0011933 | MEF2C | 1 |
| hsa-miR-325  | NM_0011933 | MEF2C | 1 |
| hsa-miR-424- | NM_0011933 | MEF2C | 1 |
| hsa-miR-329- | NM_0011933 | MEF2C | 1 |
| hsa-miR-409- | NM_0011933 | MEF2C | 1 |
| hsa-miR-492  | NM_0011933 | MEF2C | 1 |
| hsa-miR-193b | NM_0011933 | MEF2C | 1 |
| hsa-miR-193b | NM_0011933 | MEF2C | 1 |
| hsa-miR-520e | NM_0011933 | MEF2C | 1 |
| hsa-miR-520e | NM_0011933 | MEF2C | 1 |
| hsa-miR-519e | NM_0011933 | MEF2C | 1 |
| hsa-miR-520f | NM_0011933 | MEF2C | 1 |
| hsa-miR-523- | NM_0011933 | MEF2C | 1 |
| hsa-miR-519d | NM_0011933 | MEF2C | 1 |
| hsa-miR-520g | NM_0011933 | MEF2C | 1 |
| hsa-miR-520h | NM_0011933 | MEF2C | 1 |
| hsa-miR-509- | NM_0011933 | MEF2C | 1 |
| hsa-miR-514a | NM_0011933 | MEF2C | 1 |
| hsa-miR-455- | NM_0011933 | MEF2C | 1 |
| hsa-miR-487b | NM_0011933 | MEF2C | 1 |
| hsa-miR-552- | NM_0011933 | MEF2C | 1 |
| hsa-miR-552- | NM_0011933 | MEF2C | 1 |
| hsa-miR-554  | NM_0011933 | MEF2C | 1 |
| hsa-miR-585- | NM_0011933 | MEF2C | 1 |
| hsa-miR-588  | NM_0011933 | MEF2C | 1 |
| hsa-miR-550a | NM_0011933 | MEF2C | 1 |
| hsa-miR-603  | NM_0011933 | MEF2C | 1 |
| hsa-miR-615- | NM_0011933 | MEF2C | 1 |
| hsa-miR-616- | NM_0011933 | MEF2C | 1 |
| hsa-miR-618  | NM_0011933 | MEF2C | 1 |
| hsa-miR-619- | NM_0011933 | MEF2C | 1 |
| hsa-miR-625- | NM_0011933 | MEF2C | 1 |
| hsa-miR-627- | NM_0011933 | MEF2C | 1 |
| hsa-miR-627- | NM_0011933 | MEF2C | 1 |
| hsa-miR-640  | NM_0011933 | MEF2C | 1 |
| hsa-miR-642a | NM_0011933 | MEF2C | 1 |
| hsa-miR-646  | NM_0011933 | MEF2C | 1 |
| hsa-miR-654- | NM_0011933 | MEF2C | 1 |
| hsa-miR-549a | NM_0011933 | MEF2C | 1 |
| hsa-miR-659- | NM_0011933 | MEF2C | 1 |
| hsa-miR-758- | NM_0011933 | MEF2C | 1 |
| hsa-miR-767- | NM_0011933 | MEF2C | 1 |
| hsa-miR-769- | NM_0011933 | MEF2C | 1 |
| hsa-miR-764  | NM_0011933 | MEF2C | 1 |
| hsa-miR-765  | NM_0011933 | MEF2C | 1 |
| hsa-miR-765  | NM_0011933 | MEF2C | 1 |
| hsa-miR-675- | NM_0011933 | MEF2C | 1 |
| hsa-miR-891a | NM_0011933 | MEF2C | 1 |
| hsa-miR-891a | NM_0011933 | MEF2C | 1 |
| hsa-miR-892a | NM_0011933 | MEF2C | 1 |
| hsa-miR-708- | NM_0011933 | MEF2C | 1 |
| hsa-miR-887- | NM_0011933 | MEF2C | 1 |
| hsa-miR-933  | NM_0011933 | MEF2C | 1 |
| hsa-miR-935  | NM_0011933 | MEF2C | 1 |
| hsa-miR-940  | NM_0011933 | MEF2C | 1 |
| hsa-miR-1178 | NM_0011933 | MEF2C | 1 |
| hsa-miR-1180 | NM_0011933 | MEF2C | 1 |
| hsa-miR-1225 | NM_0011933 | MEF2C | 1 |
| hsa-miR-1227 | NM_0011933 | MEF2C | 1 |
| hsa-miR-1229 | NM_0011933 | MEF2C | 1 |
| hsa-miR-1231 | NM_0011933 | MEF2C | 1 |
| hsa-miR-1233 | NM_0011933 | MEF2C | 1 |
| hsa-miR-1234 | NM_0011933 | MEF2C | 1 |
| hsa-miR-1303 | NM_0011933 | MEF2C | 1 |
| hsa-miR-1245 | NM_0011933 | MEF2C | 1 |
| hsa-miR-1247 | NM_0011933 | MEF2C | 1 |
| hsa-miR-1253 | NM_0011933 | MEF2C | 1 |
| hsa-miR-1470 | NM_0011933 | MEF2C | 1 |
| hsa-miR-1471 | NM_0011933 | MEF2C | 1 |
| hsa-miR-103b | NM_0011933 | MEF2C | 1 |
| hsa-miR-1908 | NM_0011933 | MEF2C | 1 |
| hsa-miR-1909 | NM_0011933 | MEF2C | 1 |
| hsa-miR-1912 | NM_0011933 | MEF2C | 1 |
| hsa-miR-1913 | NM_0011933 | MEF2C | 1 |
| hsa-miR-1972 | NM_0011933 | MEF2C | 1 |
| hsa-miR-1973 | NM_0011933 | MEF2C | 1 |
| hsa-miR-2277 | NM_0011933 | MEF2C | 1 |
| hsa-miR-711  | NM_0011933 | MEF2C | 1 |
| hsa-miR-718  | NM_0011933 | MEF2C | 1 |
| hsa-miR-3121 | NM_0011933 | MEF2C | 1 |
| hsa-miR-3125 | NM_0011933 | MEF2C | 1 |
| hsa-miR-3126 | NM_0011933 | MEF2C | 1 |
| hsa-miR-466  | NM_0011933 | MEF2C | 1 |

|              |            |       |   |
|--------------|------------|-------|---|
| hsa-miR-544b | NM_0011933 | MEF2C | 1 |
| hsa-miR-3145 | NM_0011933 | MEF2C | 1 |
| hsa-miR-3151 | NM_0011933 | MEF2C | 1 |
| hsa-miR-3151 | NM_0011933 | MEF2C | 1 |
| hsa-miR-3158 | NM_0011933 | MEF2C | 1 |
| hsa-miR-3162 | NM_0011933 | MEF2C | 1 |
| hsa-miR-3162 | NM_0011933 | MEF2C | 1 |
| hsa-miR-3166 | NM_0011933 | MEF2C | 1 |
| hsa-miR-317C | NM_0011933 | MEF2C | 1 |
| hsa-miR-3173 | NM_0011933 | MEF2C | 1 |
| hsa-miR-3174 | NM_0011933 | MEF2C | 1 |
| hsa-miR-3176 | NM_0011933 | MEF2C | 1 |
| hsa-miR-3194 | NM_0011933 | MEF2C | 1 |
| hsa-miR-4297 | NM_0011933 | MEF2C | 1 |
| hsa-miR-4313 | NM_0011933 | MEF2C | 1 |
| hsa-miR-4323 | NM_0011933 | MEF2C | 1 |
| hsa-miR-426C | NM_0011933 | MEF2C | 1 |
| hsa-miR-426C | NM_0011933 | MEF2C | 1 |
| hsa-miR-4261 | NM_0011933 | MEF2C | 1 |
| hsa-miR-4281 | NM_0011933 | MEF2C | 1 |
| hsa-miR-4275 | NM_0011933 | MEF2C | 1 |
| hsa-miR-4286 | NM_0011933 | MEF2C | 1 |
| hsa-miR-361C | NM_0011933 | MEF2C | 1 |
| hsa-miR-3615 | NM_0011933 | MEF2C | 1 |
| hsa-miR-3622 | NM_0011933 | MEF2C | 1 |
| hsa-miR-3622 | NM_0011933 | MEF2C | 1 |
| hsa-miR-3622 | NM_0011933 | MEF2C | 1 |
| hsa-miR-365C | NM_0011933 | MEF2C | 1 |
| hsa-miR-3663 | NM_0011933 | MEF2C | 1 |
| hsa-miR-3677 | NM_0011933 | MEF2C | 1 |
| hsa-miR-3685 | NM_0011933 | MEF2C | 1 |
| hsa-miR-3688 | NM_0011933 | MEF2C | 1 |
| hsa-miR-3688 | NM_0011933 | MEF2C | 1 |
| hsa-miR-369C | NM_0011933 | MEF2C | 1 |
| hsa-miR-3692 | NM_0011933 | MEF2C | 1 |
| hsa-miR-3908 | NM_0011933 | MEF2C | 1 |
| hsa-miR-3921 | NM_0011933 | MEF2C | 1 |
| hsa-miR-3936 | NM_0011933 | MEF2C | 1 |
| hsa-miR-394C | NM_0011933 | MEF2C | 1 |
| hsa-miR-3943 | NM_0011933 | MEF2C | 1 |
| hsa-miR-3944 | NM_0011933 | MEF2C | 1 |
| hsa-miR-3945 | NM_0011933 | MEF2C | 1 |
| hsa-miR-374c | NM_0011933 | MEF2C | 1 |
| hsa-miR-642b | NM_0011933 | MEF2C | 1 |
| hsa-miR-550b | NM_0011933 | MEF2C | 1 |
| hsa-miR-4425 | NM_0011933 | MEF2C | 1 |
| hsa-miR-4446 | NM_0011933 | MEF2C | 1 |
| hsa-miR-2392 | NM_0011933 | MEF2C | 1 |
| hsa-miR-4521 | NM_0011933 | MEF2C | 1 |
| hsa-miR-4525 | NM_0011933 | MEF2C | 1 |
| hsa-miR-3978 | NM_0011933 | MEF2C | 1 |
| hsa-miR-4642 | NM_0011933 | MEF2C | 1 |
| hsa-miR-4646 | NM_0011933 | MEF2C | 1 |
| hsa-miR-4646 | NM_0011933 | MEF2C | 1 |
| hsa-miR-4645 | NM_0011933 | MEF2C | 1 |
| hsa-miR-4655 | NM_0011933 | MEF2C | 1 |
| hsa-miR-4667 | NM_0011933 | MEF2C | 1 |
| hsa-miR-4667 | NM_0011933 | MEF2C | 1 |
| hsa-miR-4676 | NM_0011933 | MEF2C | 1 |
| hsa-miR-4685 | NM_0011933 | MEF2C | 1 |
| hsa-miR-4687 | NM_0011933 | MEF2C | 1 |
| hsa-miR-1343 | NM_0011933 | MEF2C | 1 |
| hsa-miR-4685 | NM_0011933 | MEF2C | 1 |
| hsa-miR-469C | NM_0011933 | MEF2C | 1 |
| hsa-miR-4691 | NM_0011933 | MEF2C | 1 |
| hsa-miR-4692 | NM_0011933 | MEF2C | 1 |
| hsa-miR-4696 | NM_0011933 | MEF2C | 1 |
| hsa-miR-4701 | NM_0011933 | MEF2C | 1 |
| hsa-miR-4701 | NM_0011933 | MEF2C | 1 |
| hsa-miR-4706 | NM_0011933 | MEF2C | 1 |
| hsa-miR-4706 | NM_0011933 | MEF2C | 1 |
| hsa-miR-4707 | NM_0011933 | MEF2C | 1 |
| hsa-miR-4708 | NM_0011933 | MEF2C | 1 |
| hsa-miR-4714 | NM_0011933 | MEF2C | 1 |
| hsa-miR-4714 | NM_0011933 | MEF2C | 1 |
| hsa-miR-4716 | NM_0011933 | MEF2C | 1 |
| hsa-miR-4716 | NM_0011933 | MEF2C | 1 |
| hsa-miR-4717 | NM_0011933 | MEF2C | 1 |
| hsa-miR-472C | NM_0011933 | MEF2C | 1 |
| hsa-miR-4725 | NM_0011933 | MEF2C | 1 |
| hsa-miR-4731 | NM_0011933 | MEF2C | 1 |
| hsa-miR-4737 | NM_0011933 | MEF2C | 1 |
| hsa-miR-4739 | NM_0011933 | MEF2C | 1 |
| hsa-miR-4745 | NM_0011933 | MEF2C | 1 |
| hsa-miR-499b | NM_0011933 | MEF2C | 1 |
| hsa-miR-4761 | NM_0011933 | MEF2C | 1 |
| hsa-miR-4766 | NM_0011933 | MEF2C | 1 |
| hsa-miR-4783 | NM_0011933 | MEF2C | 1 |
| hsa-miR-4784 | NM_0011933 | MEF2C | 1 |
| hsa-miR-4787 | NM_0011933 | MEF2C | 1 |
| hsa-miR-4797 | NM_0011933 | MEF2C | 1 |
| hsa-miR-4804 | NM_0011933 | MEF2C | 1 |
| hsa-miR-5001 | NM_0011933 | MEF2C | 1 |
| hsa-miR-5001 | NM_0011933 | MEF2C | 1 |
| hsa-miR-5002 | NM_0011933 | MEF2C | 1 |





|                                  |   |
|----------------------------------|---|
| hsa-miR-6882 NM_0011933 MEF2C    | 1 |
| hsa-miR-6885 NM_0011933 MEF2C    | 1 |
| hsa-miR-6886 NM_0011933 MEF2C    | 1 |
| hsa-miR-6887 NM_0011933 MEF2C    | 1 |
| hsa-miR-6887 NM_0011933 MEF2C    | 1 |
| hsa-miR-6888 NM_0011933 MEF2C    | 1 |
| hsa-miR-6891 NM_0011933 MEF2C    | 1 |
| hsa-miR-6893 NM_0011933 MEF2C    | 1 |
| hsa-miR-7105 NM_0011933 MEF2C    | 1 |
| hsa-miR-711C NM_0011933 MEF2C    | 1 |
| hsa-miR-7111 NM_0011933 MEF2C    | 1 |
| hsa-miR-7151 NM_0011933 MEF2C    | 1 |
| hsa-miR-7154 NM_0011933 MEF2C    | 1 |
| hsa-miR-7157 NM_0011933 MEF2C    | 1 |
| hsa-miR-7162 NM_0011933 MEF2C    | 1 |
| hsa-miR-7702 NM_0011933 MEF2C    | 1 |
| hsa-miR-7703 NM_0011933 MEF2C    | 1 |
| hsa-miR-4433 NM_0011933 MEF2C    | 1 |
| hsa-miR-1273 NM_0011933 MEF2C    | 1 |
| hsa-miR-7844 NM_0011933 MEF2C    | 1 |
| hsa-miR-7848 NM_0011933 MEF2C    | 1 |
| hsa-miR-7849 NM_0011933 MEF2C    | 1 |
| hsa-miR-7978 NM_0011933 MEF2C    | 1 |
| hsa-miR-8058 NM_0011933 MEF2C    | 1 |
| hsa-miR-8058 NM_0011933 MEF2C    | 1 |
| hsa-miR-8059 NM_0011933 MEF2C    | 1 |
| hsa-miR-8485 NM_0011933 MEF2C    | 1 |
| hsa-miR-1039 NM_0011933 MEF2C    | 1 |
| hsa-miR-104C NM_0011933 MEF2C    | 1 |
| hsa-miR-1118 NM_0011933 MEF2C    | 1 |
| hsa-miR-114C NM_0011933 MEF2C    | 1 |
| hsa-miR-3059 NM_0011933 MEF2C    | 1 |
| hsa-miR-3085 NM_0011933 MEF2C    | 1 |
| hsa-miR-1211 NM_0011933 MEF2C    | 1 |
| hsa-miR-1212 NM_0011933 MEF2C    | 1 |
| hsa-let-7a-2-3 NM_0011933 MEF2C  | 1 |
| hsa-let-7c-3p NM_0011933 MEF2C   | 1 |
| hsa-let-7e-3p NM_0011933 MEF2C   | 1 |
| hsa-let-7e-3p NM_0011933 MEF2C   | 1 |
| hsa-let-7f-1-3j NM_0011933 MEF2C | 1 |
| hsa-miR-15a- NM_0011933 MEF2C    | 1 |
| hsa-miR-19b- NM_0011933 MEF2C    | 1 |
| hsa-miR-22-5j NM_0011933 MEF2C   | 1 |
| hsa-miR-25-5j NM_0011933 MEF2C   | 1 |
| hsa-miR-29a- NM_0011933 MEF2C    | 1 |
| hsa-miR-92a- NM_0011933 MEF2C    | 1 |
| hsa-miR-105- NM_0011933 MEF2C    | 1 |
| hsa-miR-129- NM_0011933 MEF2C    | 1 |
| hsa-miR-30d- NM_0011933 MEF2C    | 1 |
| hsa-miR-183- NM_0011933 MEF2C    | 1 |
| hsa-miR-204- NM_0011933 MEF2C    | 1 |
| hsa-miR-205- NM_0011933 MEF2C    | 1 |
| hsa-miR-210- NM_0011933 MEF2C    | 1 |
| hsa-miR-210- NM_0011933 MEF2C    | 1 |
| hsa-miR-210- NM_0011933 MEF2C    | 1 |
| hsa-miR-211- NM_0011933 MEF2C    | 1 |
| hsa-miR-211- NM_0011933 MEF2C    | 1 |
| hsa-miR-218- NM_0011933 MEF2C    | 1 |
| hsa-let-7i-3p NM_0011933 MEF2C   | 1 |
| hsa-let-7i-3p NM_0011933 MEF2C   | 1 |
| hsa-miR-23b- NM_0011933 MEF2C    | 1 |
| hsa-miR-125t NM_0011933 MEF2C    | 1 |
| hsa-miR-137- NM_0011933 MEF2C    | 1 |
| hsa-miR-142- NM_0011933 MEF2C    | 1 |
| hsa-miR-191- NM_0011933 MEF2C    | 1 |
| hsa-miR-125a NM_0011933 MEF2C    | 1 |
| hsa-miR-127- NM_0011933 MEF2C    | 1 |
| hsa-miR-129- NM_0011933 MEF2C    | 1 |
| hsa-miR-149- NM_0011933 MEF2C    | 1 |
| hsa-miR-149- NM_0011933 MEF2C    | 1 |
| hsa-miR-154- NM_0011933 MEF2C    | 1 |
| hsa-miR-186- NM_0011933 MEF2C    | 1 |
| hsa-miR-188- NM_0011933 MEF2C    | 1 |
| hsa-miR-195- NM_0011933 MEF2C    | 1 |
| hsa-miR-320a NM_0011933 MEF2C    | 1 |
| hsa-miR-128- NM_0011933 MEF2C    | 1 |
| hsa-miR-296- NM_0011933 MEF2C    | 1 |
| hsa-miR-26a- NM_0011933 MEF2C    | 1 |
| hsa-miR-302b NM_0011933 MEF2C    | 1 |
| hsa-miR-371a NM_0011933 MEF2C    | 1 |
| hsa-miR-372- NM_0011933 MEF2C    | 1 |
| hsa-miR-372- NM_0011933 MEF2C    | 1 |
| hsa-miR-376a NM_0011933 MEF2C    | 1 |
| hsa-miR-328- NM_0011933 MEF2C    | 1 |
| hsa-miR-148t NM_0011933 MEF2C    | 1 |
| hsa-miR-133t NM_0011933 MEF2C    | 1 |
| hsa-miR-325 NM_0011933 MEF2C     | 1 |
| hsa-miR-450a NM_0011933 MEF2C    | 1 |
| hsa-miR-329- NM_0011933 MEF2C    | 1 |
| hsa-miR-484 NM_0011933 MEF2C     | 1 |
| hsa-miR-494- NM_0011933 MEF2C    | 1 |
| hsa-miR-193t NM_0011933 MEF2C    | 1 |
| hsa-miR-520e NM_0011933 MEF2C    | 1 |
| hsa-miR-519e NM_0011933 MEF2C    | 1 |
| hsa-miR-520a NM_0011933 MEF2C    | 1 |

|              |            |       |   |
|--------------|------------|-------|---|
| hsa-miR-523- | NM_0011933 | MEF2C | 1 |
| hsa-miR-518c | NM_0011933 | MEF2C | 1 |
| hsa-miR-519d | NM_0011933 | MEF2C | 1 |
| hsa-miR-520g | NM_0011933 | MEF2C | 1 |
| hsa-miR-520g | NM_0011933 | MEF2C | 1 |
| hsa-miR-518d | NM_0011933 | MEF2C | 1 |
| hsa-miR-520h | NM_0011933 | MEF2C | 1 |
| hsa-miR-520h | NM_0011933 | MEF2C | 1 |
| hsa-miR-509- | NM_0011933 | MEF2C | 1 |
| hsa-miR-509- | NM_0011933 | MEF2C | 1 |
| hsa-miR-514a | NM_0011933 | MEF2C | 1 |
| hsa-miR-487b | NM_0011933 | MEF2C | 1 |
| hsa-miR-487b | NM_0011933 | MEF2C | 1 |
| hsa-miR-551a | NM_0011933 | MEF2C | 1 |
| hsa-miR-552- | NM_0011933 | MEF2C | 1 |
| hsa-miR-552- | NM_0011933 | MEF2C | 1 |
| hsa-miR-584- | NM_0011933 | MEF2C | 1 |
| hsa-miR-585- | NM_0011933 | MEF2C | 1 |
| hsa-miR-588  | NM_0011933 | MEF2C | 1 |
| hsa-miR-550a | NM_0011933 | MEF2C | 1 |
| hsa-miR-592  | NM_0011933 | MEF2C | 1 |
| hsa-miR-603  | NM_0011933 | MEF2C | 1 |
| hsa-miR-615- | NM_0011933 | MEF2C | 1 |
| hsa-miR-616- | NM_0011933 | MEF2C | 1 |
| hsa-miR-618  | NM_0011933 | MEF2C | 1 |
| hsa-miR-625- | NM_0011933 | MEF2C | 1 |
| hsa-miR-33b- | NM_0011933 | MEF2C | 1 |
| hsa-miR-642a | NM_0011933 | MEF2C | 1 |
| hsa-miR-645  | NM_0011933 | MEF2C | 1 |
| hsa-miR-646  | NM_0011933 | MEF2C | 1 |
| hsa-miR-649  | NM_0011933 | MEF2C | 1 |
| hsa-miR-650  | NM_0011933 | MEF2C | 1 |
| hsa-miR-549a | NM_0011933 | MEF2C | 1 |
| hsa-miR-659- | NM_0011933 | MEF2C | 1 |
| hsa-miR-1224 | NM_0011933 | MEF2C | 1 |
| hsa-miR-1296 | NM_0011933 | MEF2C | 1 |
| hsa-miR-1271 | NM_0011933 | MEF2C | 1 |
| hsa-miR-454- | NM_0011933 | MEF2C | 1 |
| hsa-miR-449c | NM_0011933 | MEF2C | 1 |
| hsa-miR-891a | NM_0011933 | MEF2C | 1 |
| hsa-miR-891a | NM_0011933 | MEF2C | 1 |
| hsa-miR-888- | NM_0011933 | MEF2C | 1 |
| hsa-miR-887- | NM_0011933 | MEF2C | 1 |
| hsa-miR-873- | NM_0011933 | MEF2C | 1 |
| hsa-miR-509- | NM_0011933 | MEF2C | 1 |
| hsa-miR-933  | NM_0011933 | MEF2C | 1 |
| hsa-miR-935  | NM_0011933 | MEF2C | 1 |
| hsa-miR-937- | NM_0011933 | MEF2C | 1 |
| hsa-miR-940  | NM_0011933 | MEF2C | 1 |
| hsa-miR-1178 | NM_0011933 | MEF2C | 1 |
| hsa-miR-118C | NM_0011933 | MEF2C | 1 |
| hsa-miR-1227 | NM_0011933 | MEF2C | 1 |
| hsa-miR-1229 | NM_0011933 | MEF2C | 1 |
| hsa-miR-1233 | NM_0011933 | MEF2C | 1 |
| hsa-miR-1234 | NM_0011933 | MEF2C | 1 |
| hsa-miR-1238 | NM_0011933 | MEF2C | 1 |
| hsa-miR-1204 | NM_0011933 | MEF2C | 1 |
| hsa-miR-1207 | NM_0011933 | MEF2C | 1 |
| hsa-miR-1286 | NM_0011933 | MEF2C | 1 |
| hsa-miR-1287 | NM_0011933 | MEF2C | 1 |
| hsa-miR-1295 | NM_0011933 | MEF2C | 1 |
| hsa-miR-1303 | NM_0011933 | MEF2C | 1 |
| hsa-miR-1247 | NM_0011933 | MEF2C | 1 |
| hsa-miR-1248 | NM_0011933 | MEF2C | 1 |
| hsa-miR-1253 | NM_0011933 | MEF2C | 1 |
| hsa-miR-1263 | NM_0011933 | MEF2C | 1 |
| hsa-miR-1265 | NM_0011933 | MEF2C | 1 |
| hsa-miR-1265 | NM_0011933 | MEF2C | 1 |
| hsa-miR-1266 | NM_0011933 | MEF2C | 1 |
| hsa-miR-1281 | NM_0011933 | MEF2C | 1 |
| hsa-miR-1292 | NM_0011933 | MEF2C | 1 |
| hsa-miR-1292 | NM_0011933 | MEF2C | 1 |
| hsa-miR-1469 | NM_0011933 | MEF2C | 1 |
| hsa-miR-147C | NM_0011933 | MEF2C | 1 |
| hsa-miR-103b | NM_0011933 | MEF2C | 1 |
| hsa-miR-1908 | NM_0011933 | MEF2C | 1 |
| hsa-miR-1912 | NM_0011933 | MEF2C | 1 |
| hsa-miR-1973 | NM_0011933 | MEF2C | 1 |
| hsa-miR-2116 | NM_0011933 | MEF2C | 1 |
| hsa-miR-2277 | NM_0011933 | MEF2C | 1 |
| hsa-miR-2277 | NM_0011933 | MEF2C | 1 |
| hsa-miR-2681 | NM_0011933 | MEF2C | 1 |
| hsa-miR-718  | NM_0011933 | MEF2C | 1 |
| hsa-miR-3121 | NM_0011933 | MEF2C | 1 |
| hsa-miR-3126 | NM_0011933 | MEF2C | 1 |
| hsa-miR-3126 | NM_0011933 | MEF2C | 1 |
| hsa-miR-466  | NM_0011933 | MEF2C | 1 |
| hsa-miR-544b | NM_0011933 | MEF2C | 1 |
| hsa-miR-3139 | NM_0011933 | MEF2C | 1 |
| hsa-miR-314C | NM_0011933 | MEF2C | 1 |
| hsa-miR-3145 | NM_0011933 | MEF2C | 1 |
| hsa-miR-3151 | NM_0011933 | MEF2C | 1 |
| hsa-miR-3151 | NM_0011933 | MEF2C | 1 |
| hsa-miR-3151 | NM_0011933 | MEF2C | 1 |
| hsa-miR-3158 | NM_0011933 | MEF2C | 1 |







|                                |   |
|--------------------------------|---|
| hsa-miR-15a- NM_0011933 MEF2C  | 1 |
| hsa-miR-15a- NM_0011933 MEF2C  | 1 |
| hsa-miR-17-5j NM_0011933 MEF2C | 1 |
| hsa-miR-18a- NM_0011933 MEF2C  | 1 |
| hsa-miR-23a- NM_0011933 MEF2C  | 1 |
| hsa-miR-25-5j NM_0011933 MEF2C | 1 |
| hsa-miR-29a- NM_0011933 MEF2C  | 1 |
| hsa-miR-92a- NM_0011933 MEF2C  | 1 |
| hsa-miR-103a NM_0011933 MEF2C  | 1 |
| hsa-miR-103a NM_0011933 MEF2C  | 1 |
| hsa-miR-106a NM_0011933 MEF2C  | 1 |
| hsa-miR-107 NM_0011933 MEF2C   | 1 |
| hsa-miR-129- NM_0011933 MEF2C  | 1 |
| hsa-miR-30d- NM_0011933 MEF2C  | 1 |
| hsa-miR-147a NM_0011933 MEF2C  | 1 |
| hsa-miR-147a NM_0011933 MEF2C  | 1 |
| hsa-miR-10b- NM_0011933 MEF2C  | 1 |
| hsa-miR-204- NM_0011933 MEF2C  | 1 |
| hsa-miR-205- NM_0011933 MEF2C  | 1 |
| hsa-miR-210- NM_0011933 MEF2C  | 1 |
| hsa-miR-211- NM_0011933 MEF2C  | 1 |
| hsa-miR-212- NM_0011933 MEF2C  | 1 |
| hsa-miR-214- NM_0011933 MEF2C  | 1 |
| hsa-miR-222- NM_0011933 MEF2C  | 1 |
| hsa-let-7i-3p NM_0011933 MEF2C | 1 |
| hsa-miR-23b- NM_0011933 MEF2C  | 1 |
| hsa-miR-125b NM_0011933 MEF2C  | 1 |
| hsa-miR-137- NM_0011933 MEF2C  | 1 |
| hsa-miR-137- NM_0011933 MEF2C  | 1 |
| hsa-miR-142- NM_0011933 MEF2C  | 1 |
| hsa-miR-144- NM_0011933 MEF2C  | 1 |
| hsa-miR-145- NM_0011933 MEF2C  | 1 |
| hsa-miR-191- NM_0011933 MEF2C  | 1 |
| hsa-miR-191- NM_0011933 MEF2C  | 1 |
| hsa-miR-125a NM_0011933 MEF2C  | 1 |
| hsa-miR-126- NM_0011933 MEF2C  | 1 |
| hsa-miR-127- NM_0011933 MEF2C  | 1 |
| hsa-miR-129- NM_0011933 MEF2C  | 1 |
| hsa-miR-154- NM_0011933 MEF2C  | 1 |
| hsa-miR-154- NM_0011933 MEF2C  | 1 |
| hsa-miR-185- NM_0011933 MEF2C  | 1 |
| hsa-miR-186- NM_0011933 MEF2C  | 1 |
| hsa-miR-188- NM_0011933 MEF2C  | 1 |
| hsa-miR-188- NM_0011933 MEF2C  | 1 |
| hsa-miR-206 NM_0011933 MEF2C   | 1 |
| hsa-miR-320a NM_0011933 MEF2C  | 1 |
| hsa-miR-200c NM_0011933 MEF2C  | 1 |
| hsa-miR-128- NM_0011933 MEF2C  | 1 |
| hsa-miR-296- NM_0011933 MEF2C  | 1 |
| hsa-miR-26a- NM_0011933 MEF2C  | 1 |
| hsa-miR-363- NM_0011933 MEF2C  | 1 |
| hsa-miR-302c NM_0011933 MEF2C  | 1 |
| hsa-miR-302d NM_0011933 MEF2C  | 1 |
| hsa-miR-370- NM_0011933 MEF2C  | 1 |
| hsa-miR-371a NM_0011933 MEF2C  | 1 |
| hsa-miR-372- NM_0011933 MEF2C  | 1 |
| hsa-miR-376a NM_0011933 MEF2C  | 1 |
| hsa-miR-330- NM_0011933 MEF2C  | 1 |
| hsa-miR-328- NM_0011933 MEF2C  | 1 |
| hsa-miR-328- NM_0011933 MEF2C  | 1 |
| hsa-miR-148b NM_0011933 MEF2C  | 1 |
| hsa-miR-331- NM_0011933 MEF2C  | 1 |
| hsa-miR-324- NM_0011933 MEF2C  | 1 |
| hsa-miR-325 NM_0011933 MEF2C   | 1 |
| hsa-miR-18b- NM_0011933 MEF2C  | 1 |
| hsa-miR-20b- NM_0011933 MEF2C  | 1 |
| hsa-miR-329- NM_0011933 MEF2C  | 1 |
| hsa-miR-329- NM_0011933 MEF2C  | 1 |
| hsa-miR-329- NM_0011933 MEF2C  | 1 |
| hsa-miR-409- NM_0011933 MEF2C  | 1 |
| hsa-miR-412- NM_0011933 MEF2C  | 1 |
| hsa-miR-483- NM_0011933 MEF2C  | 1 |
| hsa-miR-484 NM_0011933 MEF2C   | 1 |
| hsa-miR-488- NM_0011933 MEF2C  | 1 |
| hsa-miR-490- NM_0011933 MEF2C  | 1 |
| hsa-miR-511- NM_0011933 MEF2C  | 1 |
| hsa-miR-202- NM_0011933 MEF2C  | 1 |
| hsa-miR-492 NM_0011933 MEF2C   | 1 |
| hsa-miR-494- NM_0011933 MEF2C  | 1 |
| hsa-miR-193b NM_0011933 MEF2C  | 1 |
| hsa-miR-519e NM_0011933 MEF2C  | 1 |
| hsa-miR-526a NM_0011933 MEF2C  | 1 |
| hsa-miR-524- NM_0011933 MEF2C  | 1 |
| hsa-miR-519d NM_0011933 MEF2C  | 1 |
| hsa-miR-518a NM_0011933 MEF2C  | 1 |
| hsa-miR-518d NM_0011933 MEF2C  | 1 |
| hsa-miR-520h NM_0011933 MEF2C  | 1 |
| hsa-miR-500a NM_0011933 MEF2C  | 1 |
| hsa-miR-501- NM_0011933 MEF2C  | 1 |
| hsa-miR-501- NM_0011933 MEF2C  | 1 |
| hsa-miR-502- NM_0011933 MEF2C  | 1 |
| hsa-miR-504- NM_0011933 MEF2C  | 1 |
| hsa-miR-514a NM_0011933 MEF2C  | 1 |
| hsa-miR-532- NM_0011933 MEF2C  | 1 |

|              |            |       |   |
|--------------|------------|-------|---|
| hsa-miR-455- | NM_0011933 | MEF2C | 1 |
| hsa-miR-487b | NM_0011933 | MEF2C | 1 |
| hsa-miR-487b | NM_0011933 | MEF2C | 1 |
| hsa-miR-487b | NM_0011933 | MEF2C | 1 |
| hsa-miR-487b | NM_0011933 | MEF2C | 1 |
| hsa-miR-551b | NM_0011933 | MEF2C | 1 |
| hsa-miR-574- | NM_0011933 | MEF2C | 1 |
| hsa-miR-584- | NM_0011933 | MEF2C | 1 |
| hsa-miR-585- | NM_0011933 | MEF2C | 1 |
| hsa-miR-550a | NM_0011933 | MEF2C | 1 |
| hsa-miR-603  | NM_0011933 | MEF2C | 1 |
| hsa-miR-615- | NM_0011933 | MEF2C | 1 |
| hsa-miR-615- | NM_0011933 | MEF2C | 1 |
| hsa-miR-616- | NM_0011933 | MEF2C | 1 |
| hsa-miR-33b- | NM_0011933 | MEF2C | 1 |
| hsa-miR-638  | NM_0011933 | MEF2C | 1 |
| hsa-miR-642a | NM_0011933 | MEF2C | 1 |
| hsa-miR-642a | NM_0011933 | MEF2C | 1 |
| hsa-miR-645  | NM_0011933 | MEF2C | 1 |
| hsa-miR-646  | NM_0011933 | MEF2C | 1 |
| hsa-miR-648  | NM_0011933 | MEF2C | 1 |
| hsa-miR-650  | NM_0011933 | MEF2C | 1 |
| hsa-miR-549a | NM_0011933 | MEF2C | 1 |
| hsa-miR-659- | NM_0011933 | MEF2C | 1 |
| hsa-miR-668- | NM_0011933 | MEF2C | 1 |
| hsa-miR-767- | NM_0011933 | MEF2C | 1 |
| hsa-miR-1224 | NM_0011933 | MEF2C | 1 |
| hsa-miR-320b | NM_0011933 | MEF2C | 1 |
| hsa-miR-320c | NM_0011933 | MEF2C | 1 |
| hsa-miR-1271 | NM_0011933 | MEF2C | 1 |
| hsa-miR-449c | NM_0011933 | MEF2C | 1 |
| hsa-miR-449c | NM_0011933 | MEF2C | 1 |
| hsa-miR-449c | NM_0011933 | MEF2C | 1 |
| hsa-miR-449c | NM_0011933 | MEF2C | 1 |
| hsa-miR-670- | NM_0011933 | MEF2C | 1 |
| hsa-miR-2113 | NM_0011933 | MEF2C | 1 |
| hsa-miR-764  | NM_0011933 | MEF2C | 1 |
| hsa-miR-765  | NM_0011933 | MEF2C | 1 |
| hsa-miR-891a | NM_0011933 | MEF2C | 1 |
| hsa-miR-891a | NM_0011933 | MEF2C | 1 |
| hsa-miR-450b | NM_0011933 | MEF2C | 1 |
| hsa-miR-874- | NM_0011933 | MEF2C | 1 |
| hsa-miR-892b | NM_0011933 | MEF2C | 1 |
| hsa-miR-892b | NM_0011933 | MEF2C | 1 |
| hsa-miR-887- | NM_0011933 | MEF2C | 1 |
| hsa-miR-873- | NM_0011933 | MEF2C | 1 |
| hsa-miR-760  | NM_0011933 | MEF2C | 1 |
| hsa-miR-760  | NM_0011933 | MEF2C | 1 |
| hsa-miR-933  | NM_0011933 | MEF2C | 1 |
| hsa-miR-935  | NM_0011933 | MEF2C | 1 |
| hsa-miR-936  | NM_0011933 | MEF2C | 1 |
| hsa-miR-939- | NM_0011933 | MEF2C | 1 |
| hsa-miR-939- | NM_0011933 | MEF2C | 1 |
| hsa-miR-940  | NM_0011933 | MEF2C | 1 |
| hsa-miR-1180 | NM_0011933 | MEF2C | 1 |
| hsa-miR-1225 | NM_0011933 | MEF2C | 1 |
| hsa-miR-1227 | NM_0011933 | MEF2C | 1 |
| hsa-miR-1228 | NM_0011933 | MEF2C | 1 |
| hsa-miR-1229 | NM_0011933 | MEF2C | 1 |
| hsa-miR-1229 | NM_0011933 | MEF2C | 1 |
| hsa-miR-1233 | NM_0011933 | MEF2C | 1 |
| hsa-miR-1233 | NM_0011933 | MEF2C | 1 |
| hsa-miR-1236 | NM_0011933 | MEF2C | 1 |
| hsa-miR-1237 | NM_0011933 | MEF2C | 1 |
| hsa-miR-1237 | NM_0011933 | MEF2C | 1 |
| hsa-miR-1204 | NM_0011933 | MEF2C | 1 |
| hsa-miR-1286 | NM_0011933 | MEF2C | 1 |
| hsa-miR-1287 | NM_0011933 | MEF2C | 1 |
| hsa-miR-1303 | NM_0011933 | MEF2C | 1 |
| hsa-miR-1244 | NM_0011933 | MEF2C | 1 |
| hsa-miR-1248 | NM_0011933 | MEF2C | 1 |
| hsa-miR-1249 | NM_0011933 | MEF2C | 1 |
| hsa-miR-1251 | NM_0011933 | MEF2C | 1 |
| hsa-miR-1251 | NM_0011933 | MEF2C | 1 |
| hsa-miR-1253 | NM_0011933 | MEF2C | 1 |
| hsa-miR-1263 | NM_0011933 | MEF2C | 1 |
| hsa-miR-1265 | NM_0011933 | MEF2C | 1 |
| hsa-miR-1266 | NM_0011933 | MEF2C | 1 |
| hsa-miR-1269 | NM_0011933 | MEF2C | 1 |
| hsa-miR-1272 | NM_0011933 | MEF2C | 1 |
| hsa-miR-1281 | NM_0011933 | MEF2C | 1 |
| hsa-miR-1292 | NM_0011933 | MEF2C | 1 |
| hsa-miR-1292 | NM_0011933 | MEF2C | 1 |
| hsa-miR-147C | NM_0011933 | MEF2C | 1 |
| hsa-miR-1538 | NM_0011933 | MEF2C | 1 |
| hsa-miR-1539 | NM_0011933 | MEF2C | 1 |
| hsa-miR-103b | NM_0011933 | MEF2C | 1 |
| hsa-miR-103b | NM_0011933 | MEF2C | 1 |
| hsa-miR-320d | NM_0011933 | MEF2C | 1 |
| hsa-miR-1908 | NM_0011933 | MEF2C | 1 |
| hsa-miR-1911 | NM_0011933 | MEF2C | 1 |
| hsa-miR-1913 | NM_0011933 | MEF2C | 1 |
| hsa-miR-1914 | NM_0011933 | MEF2C | 1 |
| hsa-miR-1972 | NM_0011933 | MEF2C | 1 |
| hsa-miR-1973 | NM_0011933 | MEF2C | 1 |











|                               |            |
|-------------------------------|------------|
| hsa-miR-1139 NM_0011933 MEF2C | 1          |
| hsa-miR-3059 NM_0011933 MEF2C | 1          |
| hsa-miR-3059 NM_0011933 MEF2C | 1          |
| hsa-miR-3085 NM_0011933 MEF2C | 1          |
| hsa-miR-1211 NM_0011933 MEF2C | 1          |
| hsa-miR-1211 NM_0011933 MEF2C | 1          |
| hsa-miR-1212 NM_0011933 MEF2C | 1          |
| hsa-miR-1181 NM_022342 KIF9   | 0.95897436 |
| hsa-miR-194- NM_182902 KIF9   | 0.96153846 |
| hsa-miR-2355 NM_182902 KIF9   | 0.96153846 |
| hsa-miR-3678 NM_182902 KIF9   | 0.96153846 |
| hsa-miR-4494 NM_182902 KIF9   | 0.96153846 |
| hsa-miR-6085 NM_182902 KIF9   | 0.96153846 |
| hsa-miR-6515 NM_182902 KIF9   | 0.96153846 |
| hsa-miR-6828 NM_182902 KIF9   | 0.96153846 |
| hsa-miR-1211 NM_182902 KIF9   | 0.96153846 |
| hsa-miR-3664 NM_022342 KIF9   | 0.96153846 |
| hsa-miR-664t NM_022342 KIF9   | 0.96153846 |
| hsa-miR-6085 NM_022342 KIF9   | 0.96153846 |
| hsa-miR-6511 NM_022342 KIF9   | 0.96153846 |
| hsa-miR-6515 NM_022342 KIF9   | 0.96153846 |
| hsa-miR-6828 NM_022342 KIF9   | 0.96153846 |
| hsa-miR-664t NM_0011348 KIF9  | 0.96153846 |
| hsa-miR-6085 NM_0011348 KIF9  | 0.96153846 |
| hsa-miR-6726 NM_0011348 KIF9  | 0.96153846 |
| hsa-miR-6828 NM_0011348 KIF9  | 0.96153846 |
| hsa-miR-642a NM_022342 KIF9   | 0.96923077 |
| hsa-miR-1281 NM_022342 KIF9   | 0.96923077 |
| hsa-miR-4421 NM_022342 KIF9   | 0.96923077 |
| hsa-miR-4746 NM_022342 KIF9   | 0.96923077 |
| hsa-miR-6894 NM_022342 KIF9   | 0.96923077 |
| hsa-miR-104C NM_022342 KIF9   | 0.96923077 |
| hsa-miR-475C NM_0011348 KIF9  | 0.96923077 |
| hsa-miR-5681 NM_0011348 KIF9  | 0.96923077 |
| hsa-miR-134- NM_182902 KIF9   | 0.97435897 |
| hsa-miR-942- NM_182902 KIF9   | 0.97435897 |
| hsa-miR-134- NM_022342 KIF9   | 0.97435897 |
| hsa-miR-942- NM_022342 KIF9   | 0.97435897 |
| hsa-miR-942- NM_0011348 KIF9  | 0.97435897 |
| hsa-miR-8058 NM_0011348 KIF9  | 0.97435897 |
| hsa-miR-486- NM_182902 KIF9   | 0.98076923 |
| hsa-miR-3141 NM_182902 KIF9   | 0.98076923 |
| hsa-miR-4421 NM_182902 KIF9   | 0.98076923 |
| hsa-miR-378j NM_022342 KIF9   | 0.98076923 |
| hsa-miR-486- NM_0011348 KIF9  | 0.98076923 |
| hsa-miR-1226 NM_0011348 KIF9  | 0.98076923 |
| hsa-miR-443C NM_0011348 KIF9  | 0.98076923 |
| hsa-miR-378j NM_0011348 KIF9  | 0.98076923 |
| hsa-miR-6756 NM_0011348 KIF9  | 0.98076923 |
| hsa-miR-602 NM_022342 KIF9    | 0.98717949 |
| hsa-miR-15a- NM_182902 KIF9   | 1          |
| hsa-miR-24-1- NM_182902 KIF9  | 1          |
| hsa-miR-24-3j NM_182902 KIF9  | 1          |
| hsa-miR-25-3j NM_182902 KIF9  | 1          |
| hsa-miR-93-3j NM_182902 KIF9  | 1          |
| hsa-miR-93-3j NM_182902 KIF9  | 1          |
| hsa-miR-197- NM_182902 KIF9   | 1          |
| hsa-miR-197- NM_182902 KIF9   | 1          |
| hsa-miR-143- NM_182902 KIF9   | 1          |
| hsa-miR-127- NM_182902 KIF9   | 1          |
| hsa-miR-149- NM_182902 KIF9   | 1          |
| hsa-miR-188- NM_182902 KIF9   | 1          |
| hsa-miR-188- NM_182902 KIF9   | 1          |
| hsa-miR-301a NM_182902 KIF9   | 1          |
| hsa-miR-296- NM_182902 KIF9   | 1          |
| hsa-miR-130t NM_182902 KIF9   | 1          |
| hsa-miR-376c NM_182902 KIF9   | 1          |
| hsa-miR-370- NM_182902 KIF9   | 1          |
| hsa-miR-377- NM_182902 KIF9   | 1          |
| hsa-miR-381- NM_182902 KIF9   | 1          |
| hsa-miR-135t NM_182902 KIF9   | 1          |
| hsa-miR-338- NM_182902 KIF9   | 1          |
| hsa-miR-423- NM_182902 KIF9   | 1          |
| hsa-miR-20b- NM_182902 KIF9   | 1          |
| hsa-miR-486- NM_182902 KIF9   | 1          |
| hsa-miR-489- NM_182902 KIF9   | 1          |
| hsa-miR-146t NM_182902 KIF9   | 1          |
| hsa-miR-495- NM_182902 KIF9   | 1          |
| hsa-miR-516t NM_182902 KIF9   | 1          |
| hsa-miR-516a NM_182902 KIF9   | 1          |
| hsa-miR-501- NM_182902 KIF9   | 1          |
| hsa-miR-502- NM_182902 KIF9   | 1          |
| hsa-miR-504- NM_182902 KIF9   | 1          |
| hsa-miR-509- NM_182902 KIF9   | 1          |
| hsa-miR-487t NM_182902 KIF9   | 1          |
| hsa-miR-567 NM_182902 KIF9    | 1          |
| hsa-miR-550a NM_182902 KIF9   | 1          |
| hsa-miR-597- NM_182902 KIF9   | 1          |
| hsa-miR-608 NM_182902 KIF9    | 1          |
| hsa-miR-609 NM_182902 KIF9    | 1          |
| hsa-miR-610 NM_182902 KIF9    | 1          |
| hsa-miR-613 NM_182902 KIF9    | 1          |
| hsa-miR-627- NM_182902 KIF9   | 1          |
| hsa-miR-635 NM_182902 KIF9    | 1          |

|              |           |      |   |
|--------------|-----------|------|---|
| hsa-miR-637  | NM_182902 | KIF9 | 1 |
| hsa-miR-642a | NM_182902 | KIF9 | 1 |
| hsa-miR-646  | NM_182902 | KIF9 | 1 |
| hsa-miR-449t | NM_182902 | KIF9 | 1 |
| hsa-miR-656- | NM_182902 | KIF9 | 1 |
| hsa-miR-550a | NM_182902 | KIF9 | 1 |
| hsa-miR-769- | NM_182902 | KIF9 | 1 |
| hsa-miR-769- | NM_182902 | KIF9 | 1 |
| hsa-miR-541- | NM_182902 | KIF9 | 1 |
| hsa-miR-887- | NM_182902 | KIF9 | 1 |
| hsa-miR-937- | NM_182902 | KIF9 | 1 |
| hsa-miR-1178 | NM_182902 | KIF9 | 1 |
| hsa-miR-1182 | NM_182902 | KIF9 | 1 |
| hsa-miR-1238 | NM_182902 | KIF9 | 1 |
| hsa-miR-1202 | NM_182902 | KIF9 | 1 |
| hsa-miR-1208 | NM_182902 | KIF9 | 1 |
| hsa-miR-1295 | NM_182902 | KIF9 | 1 |
| hsa-miR-1255 | NM_182902 | KIF9 | 1 |
| hsa-miR-126C | NM_182902 | KIF9 | 1 |
| hsa-miR-1265 | NM_182902 | KIF9 | 1 |
| hsa-miR-1266 | NM_182902 | KIF9 | 1 |
| hsa-miR-1281 | NM_182902 | KIF9 | 1 |
| hsa-miR-664a | NM_182902 | KIF9 | 1 |
| hsa-miR-1306 | NM_182902 | KIF9 | 1 |
| hsa-miR-1471 | NM_182902 | KIF9 | 1 |
| hsa-miR-1912 | NM_182902 | KIF9 | 1 |
| hsa-miR-2116 | NM_182902 | KIF9 | 1 |
| hsa-miR-2116 | NM_182902 | KIF9 | 1 |
| hsa-miR-2681 | NM_182902 | KIF9 | 1 |
| hsa-miR-2682 | NM_182902 | KIF9 | 1 |
| hsa-miR-718  | NM_182902 | KIF9 | 1 |
| hsa-miR-2861 | NM_182902 | KIF9 | 1 |
| hsa-miR-3125 | NM_182902 | KIF9 | 1 |
| hsa-miR-378t | NM_182902 | KIF9 | 1 |
| hsa-miR-3135 | NM_182902 | KIF9 | 1 |
| hsa-miR-3158 | NM_182902 | KIF9 | 1 |
| hsa-miR-3158 | NM_182902 | KIF9 | 1 |
| hsa-miR-126C | NM_182902 | KIF9 | 1 |
| hsa-miR-3173 | NM_182902 | KIF9 | 1 |
| hsa-miR-318C | NM_182902 | KIF9 | 1 |
| hsa-miR-3188 | NM_182902 | KIF9 | 1 |
| hsa-miR-3185 | NM_182902 | KIF9 | 1 |
| hsa-miR-3192 | NM_182902 | KIF9 | 1 |
| hsa-miR-4297 | NM_182902 | KIF9 | 1 |
| hsa-miR-430C | NM_182902 | KIF9 | 1 |
| hsa-miR-426C | NM_182902 | KIF9 | 1 |
| hsa-miR-4273 | NM_182902 | KIF9 | 1 |
| hsa-miR-4277 | NM_182902 | KIF9 | 1 |
| hsa-miR-4277 | NM_182902 | KIF9 | 1 |
| hsa-miR-3617 | NM_182902 | KIF9 | 1 |
| hsa-miR-362C | NM_182902 | KIF9 | 1 |
| hsa-miR-362C | NM_182902 | KIF9 | 1 |
| hsa-miR-3622 | NM_182902 | KIF9 | 1 |
| hsa-miR-3664 | NM_182902 | KIF9 | 1 |
| hsa-miR-3664 | NM_182902 | KIF9 | 1 |
| hsa-miR-3681 | NM_182902 | KIF9 | 1 |
| hsa-miR-3682 | NM_182902 | KIF9 | 1 |
| hsa-miR-3691 | NM_182902 | KIF9 | 1 |
| hsa-miR-318C | NM_182902 | KIF9 | 1 |
| hsa-miR-4421 | NM_182902 | KIF9 | 1 |
| hsa-miR-4425 | NM_182902 | KIF9 | 1 |
| hsa-miR-4425 | NM_182902 | KIF9 | 1 |
| hsa-miR-443C | NM_182902 | KIF9 | 1 |
| hsa-miR-4433 | NM_182902 | KIF9 | 1 |
| hsa-miR-4438 | NM_182902 | KIF9 | 1 |
| hsa-miR-4446 | NM_182902 | KIF9 | 1 |
| hsa-miR-4445 | NM_182902 | KIF9 | 1 |
| hsa-miR-445C | NM_182902 | KIF9 | 1 |
| hsa-miR-4453 | NM_182902 | KIF9 | 1 |
| hsa-miR-4454 | NM_182902 | KIF9 | 1 |
| hsa-miR-4462 | NM_182902 | KIF9 | 1 |
| hsa-miR-4465 | NM_182902 | KIF9 | 1 |
| hsa-miR-451C | NM_182902 | KIF9 | 1 |
| hsa-miR-4514 | NM_182902 | KIF9 | 1 |
| hsa-miR-4538 | NM_182902 | KIF9 | 1 |
| hsa-miR-4535 | NM_182902 | KIF9 | 1 |
| hsa-miR-4632 | NM_182902 | KIF9 | 1 |
| hsa-miR-4633 | NM_182902 | KIF9 | 1 |
| hsa-miR-4646 | NM_182902 | KIF9 | 1 |
| hsa-miR-466C | NM_182902 | KIF9 | 1 |
| hsa-miR-4661 | NM_182902 | KIF9 | 1 |
| hsa-miR-4661 | NM_182902 | KIF9 | 1 |
| hsa-miR-4667 | NM_182902 | KIF9 | 1 |
| hsa-miR-4676 | NM_182902 | KIF9 | 1 |
| hsa-miR-4676 | NM_182902 | KIF9 | 1 |
| hsa-miR-4683 | NM_182902 | KIF9 | 1 |
| hsa-miR-4685 | NM_182902 | KIF9 | 1 |
| hsa-miR-4687 | NM_182902 | KIF9 | 1 |
| hsa-miR-4688 | NM_182902 | KIF9 | 1 |
| hsa-miR-4695 | NM_182902 | KIF9 | 1 |
| hsa-miR-4695 | NM_182902 | KIF9 | 1 |
| hsa-miR-4697 | NM_182902 | KIF9 | 1 |
| hsa-miR-4723 | NM_182902 | KIF9 | 1 |
| hsa-miR-4726 | NM_182902 | KIF9 | 1 |

|                        |      |   |
|------------------------|------|---|
| hsa-miR-4727 NM_182902 | KIF9 | 1 |
| hsa-miR-4728 NM_182902 | KIF9 | 1 |
| hsa-miR-474C NM_182902 | KIF9 | 1 |
| hsa-miR-474C NM_182902 | KIF9 | 1 |
| hsa-miR-122t NM_182902 | KIF9 | 1 |
| hsa-miR-4746 NM_182902 | KIF9 | 1 |
| hsa-miR-475C NM_182902 | KIF9 | 1 |
| hsa-miR-4758 NM_182902 | KIF9 | 1 |
| hsa-miR-4774 NM_182902 | KIF9 | 1 |
| hsa-miR-4776 NM_182902 | KIF9 | 1 |
| hsa-miR-5001 NM_182902 | KIF9 | 1 |
| hsa-miR-5002 NM_182902 | KIF9 | 1 |
| hsa-miR-548a NM_182902 | KIF9 | 1 |
| hsa-miR-5007 NM_182902 | KIF9 | 1 |
| hsa-miR-5005 NM_182902 | KIF9 | 1 |
| hsa-miR-5571 NM_182902 | KIF9 | 1 |
| hsa-miR-5572 NM_182902 | KIF9 | 1 |
| hsa-miR-5581 NM_182902 | KIF9 | 1 |
| hsa-miR-5584 NM_182902 | KIF9 | 1 |
| hsa-miR-5585 NM_182902 | KIF9 | 1 |
| hsa-miR-5591 NM_182902 | KIF9 | 1 |
| hsa-miR-5739 NM_182902 | KIF9 | 1 |
| hsa-miR-607C NM_182902 | KIF9 | 1 |
| hsa-miR-6088 NM_182902 | KIF9 | 1 |
| hsa-miR-6129 NM_182902 | KIF9 | 1 |
| hsa-miR-6165 NM_182902 | KIF9 | 1 |
| hsa-miR-6505 NM_182902 | KIF9 | 1 |
| hsa-miR-6511 NM_182902 | KIF9 | 1 |
| hsa-miR-6511 NM_182902 | KIF9 | 1 |
| hsa-miR-6726 NM_182902 | KIF9 | 1 |
| hsa-miR-6729 NM_182902 | KIF9 | 1 |
| hsa-miR-6731 NM_182902 | KIF9 | 1 |
| hsa-miR-6731 NM_182902 | KIF9 | 1 |
| hsa-miR-6732 NM_182902 | KIF9 | 1 |
| hsa-miR-6735 NM_182902 | KIF9 | 1 |
| hsa-miR-6735 NM_182902 | KIF9 | 1 |
| hsa-miR-6743 NM_182902 | KIF9 | 1 |
| hsa-miR-6744 NM_182902 | KIF9 | 1 |
| hsa-miR-6746 NM_182902 | KIF9 | 1 |
| hsa-miR-6748 NM_182902 | KIF9 | 1 |
| hsa-miR-6749 NM_182902 | KIF9 | 1 |
| hsa-miR-6749 NM_182902 | KIF9 | 1 |
| hsa-miR-675C NM_182902 | KIF9 | 1 |
| hsa-miR-6756 NM_182902 | KIF9 | 1 |
| hsa-miR-6757 NM_182902 | KIF9 | 1 |
| hsa-miR-6759 NM_182902 | KIF9 | 1 |
| hsa-miR-6761 NM_182902 | KIF9 | 1 |
| hsa-miR-6766 NM_182902 | KIF9 | 1 |
| hsa-miR-6768 NM_182902 | KIF9 | 1 |
| hsa-miR-6778 NM_182902 | KIF9 | 1 |
| hsa-miR-6779 NM_182902 | KIF9 | 1 |
| hsa-miR-678C NM_182902 | KIF9 | 1 |
| hsa-miR-6784 NM_182902 | KIF9 | 1 |
| hsa-miR-6787 NM_182902 | KIF9 | 1 |
| hsa-miR-6788 NM_182902 | KIF9 | 1 |
| hsa-miR-679C NM_182902 | KIF9 | 1 |
| hsa-miR-6791 NM_182902 | KIF9 | 1 |
| hsa-miR-6796 NM_182902 | KIF9 | 1 |
| hsa-miR-6797 NM_182902 | KIF9 | 1 |
| hsa-miR-680C NM_182902 | KIF9 | 1 |
| hsa-miR-680C NM_182902 | KIF9 | 1 |
| hsa-miR-6801 NM_182902 | KIF9 | 1 |
| hsa-miR-6802 NM_182902 | KIF9 | 1 |
| hsa-miR-6802 NM_182902 | KIF9 | 1 |
| hsa-miR-6804 NM_182902 | KIF9 | 1 |
| hsa-miR-6812 NM_182902 | KIF9 | 1 |
| hsa-miR-6813 NM_182902 | KIF9 | 1 |
| hsa-miR-6819 NM_182902 | KIF9 | 1 |
| hsa-miR-6824 NM_182902 | KIF9 | 1 |
| hsa-miR-6825 NM_182902 | KIF9 | 1 |
| hsa-miR-6831 NM_182902 | KIF9 | 1 |
| hsa-miR-6832 NM_182902 | KIF9 | 1 |
| hsa-miR-6835 NM_182902 | KIF9 | 1 |
| hsa-miR-6835 NM_182902 | KIF9 | 1 |
| hsa-miR-684C NM_182902 | KIF9 | 1 |
| hsa-miR-6847 NM_182902 | KIF9 | 1 |
| hsa-miR-6849 NM_182902 | KIF9 | 1 |
| hsa-miR-6858 NM_182902 | KIF9 | 1 |
| hsa-miR-6868 NM_182902 | KIF9 | 1 |
| hsa-miR-687C NM_182902 | KIF9 | 1 |
| hsa-miR-687C NM_182902 | KIF9 | 1 |
| hsa-miR-6875 NM_182902 | KIF9 | 1 |
| hsa-miR-6876 NM_182902 | KIF9 | 1 |
| hsa-miR-6878 NM_182902 | KIF9 | 1 |
| hsa-miR-6888 NM_182902 | KIF9 | 1 |
| hsa-miR-689C NM_182902 | KIF9 | 1 |
| hsa-miR-6895 NM_182902 | KIF9 | 1 |
| hsa-miR-7107 NM_182902 | KIF9 | 1 |
| hsa-miR-711C NM_182902 | KIF9 | 1 |
| hsa-miR-7114 NM_182902 | KIF9 | 1 |
| hsa-miR-7156 NM_182902 | KIF9 | 1 |
| hsa-miR-7706 NM_182902 | KIF9 | 1 |
| hsa-miR-4433 NM_182902 | KIF9 | 1 |
| hsa-miR-806C NM_182902 | KIF9 | 1 |

|                         |      |   |
|-------------------------|------|---|
| hsa-miR-8071 NM_182902  | KIF9 | 1 |
| hsa-miR-8085 NM_182902  | KIF9 | 1 |
| hsa-miR-1039 NM_182902  | KIF9 | 1 |
| hsa-miR-1039 NM_182902  | KIF9 | 1 |
| hsa-miR-104C NM_182902  | KIF9 | 1 |
| hsa-miR-104C NM_182902  | KIF9 | 1 |
| hsa-miR-114C NM_182902  | KIF9 | 1 |
| hsa-miR-3059 NM_182902  | KIF9 | 1 |
| hsa-miR-6529 NM_182902  | KIF9 | 1 |
| hsa-miR-1211 NM_182902  | KIF9 | 1 |
| hsa-miR-1213 NM_182902  | KIF9 | 1 |
| hsa-let-7e-5p NM_022342 | KIF9 | 1 |
| hsa-miR-15a- NM_022342  | KIF9 | 1 |
| hsa-miR-24-1- NM_022342 | KIF9 | 1 |
| hsa-miR-24-3j NM_022342 | KIF9 | 1 |
| hsa-miR-93-3j NM_022342 | KIF9 | 1 |
| hsa-miR-93-3j NM_022342 | KIF9 | 1 |
| hsa-miR-197- NM_022342  | KIF9 | 1 |
| hsa-miR-129- NM_022342  | KIF9 | 1 |
| hsa-miR-127- NM_022342  | KIF9 | 1 |
| hsa-miR-129- NM_022342  | KIF9 | 1 |
| hsa-miR-149- NM_022342  | KIF9 | 1 |
| hsa-miR-185- NM_022342  | KIF9 | 1 |
| hsa-miR-188- NM_022342  | KIF9 | 1 |
| hsa-miR-194- NM_022342  | KIF9 | 1 |
| hsa-miR-30c- NM_022342  | KIF9 | 1 |
| hsa-miR-301a NM_022342  | KIF9 | 1 |
| hsa-miR-296- NM_022342  | KIF9 | 1 |
| hsa-miR-130b NM_022342  | KIF9 | 1 |
| hsa-miR-370- NM_022342  | KIF9 | 1 |
| hsa-miR-377- NM_022342  | KIF9 | 1 |
| hsa-miR-381- NM_022342  | KIF9 | 1 |
| hsa-miR-326 NM_022342   | KIF9 | 1 |
| hsa-miR-422a NM_022342  | KIF9 | 1 |
| hsa-miR-423- NM_022342  | KIF9 | 1 |
| hsa-miR-486- NM_022342  | KIF9 | 1 |
| hsa-miR-489- NM_022342  | KIF9 | 1 |
| hsa-miR-146b NM_022342  | KIF9 | 1 |
| hsa-miR-494- NM_022342  | KIF9 | 1 |
| hsa-miR-516b NM_022342  | KIF9 | 1 |
| hsa-miR-516a NM_022342  | KIF9 | 1 |
| hsa-miR-501- NM_022342  | KIF9 | 1 |
| hsa-miR-502- NM_022342  | KIF9 | 1 |
| hsa-miR-532- NM_022342  | KIF9 | 1 |
| hsa-miR-567 NM_022342   | KIF9 | 1 |
| hsa-miR-574- NM_022342  | KIF9 | 1 |
| hsa-miR-550a NM_022342  | KIF9 | 1 |
| hsa-miR-597- NM_022342  | KIF9 | 1 |
| hsa-miR-608 NM_022342   | KIF9 | 1 |
| hsa-miR-609 NM_022342   | KIF9 | 1 |
| hsa-miR-610 NM_022342   | KIF9 | 1 |
| hsa-miR-613 NM_022342   | KIF9 | 1 |
| hsa-miR-623 NM_022342   | KIF9 | 1 |
| hsa-miR-627- NM_022342  | KIF9 | 1 |
| hsa-miR-635 NM_022342   | KIF9 | 1 |
| hsa-miR-637 NM_022342   | KIF9 | 1 |
| hsa-miR-449b NM_022342  | KIF9 | 1 |
| hsa-miR-656- NM_022342  | KIF9 | 1 |
| hsa-miR-668- NM_022342  | KIF9 | 1 |
| hsa-miR-550a NM_022342  | KIF9 | 1 |
| hsa-miR-1271 NM_022342  | KIF9 | 1 |
| hsa-miR-769- NM_022342  | KIF9 | 1 |
| hsa-miR-769- NM_022342  | KIF9 | 1 |
| hsa-miR-378d NM_022342  | KIF9 | 1 |
| hsa-miR-762 NM_022342   | KIF9 | 1 |
| hsa-miR-541- NM_022342  | KIF9 | 1 |
| hsa-miR-887- NM_022342  | KIF9 | 1 |
| hsa-miR-937- NM_022342  | KIF9 | 1 |
| hsa-miR-1182 NM_022342  | KIF9 | 1 |
| hsa-miR-1202 NM_022342  | KIF9 | 1 |
| hsa-miR-1208 NM_022342  | KIF9 | 1 |
| hsa-miR-1294 NM_022342  | KIF9 | 1 |
| hsa-miR-1295 NM_022342  | KIF9 | 1 |
| hsa-miR-1255 NM_022342  | KIF9 | 1 |
| hsa-miR-1265 NM_022342  | KIF9 | 1 |
| hsa-miR-1266 NM_022342  | KIF9 | 1 |
| hsa-miR-1276 NM_022342  | KIF9 | 1 |
| hsa-miR-1255 NM_022342  | KIF9 | 1 |
| hsa-miR-664a NM_022342  | KIF9 | 1 |
| hsa-miR-1306 NM_022342  | KIF9 | 1 |
| hsa-miR-1471 NM_022342  | KIF9 | 1 |
| hsa-miR-1912 NM_022342  | KIF9 | 1 |
| hsa-miR-2116 NM_022342  | KIF9 | 1 |
| hsa-miR-2116 NM_022342  | KIF9 | 1 |
| hsa-miR-2681 NM_022342  | KIF9 | 1 |
| hsa-miR-2681 NM_022342  | KIF9 | 1 |
| hsa-miR-2682 NM_022342  | KIF9 | 1 |
| hsa-miR-718 NM_022342   | KIF9 | 1 |
| hsa-miR-2861 NM_022342  | KIF9 | 1 |
| hsa-miR-3135 NM_022342  | KIF9 | 1 |
| hsa-miR-3141 NM_022342  | KIF9 | 1 |
| hsa-miR-3158 NM_022342  | KIF9 | 1 |
| hsa-miR-1260 NM_022342  | KIF9 | 1 |
| hsa-miR-3173 NM_022342  | KIF9 | 1 |

|                        |      |   |
|------------------------|------|---|
| hsa-miR-3174 NM_022342 | KIF9 | 1 |
| hsa-miR-3180 NM_022342 | KIF9 | 1 |
| hsa-miR-3188 NM_022342 | KIF9 | 1 |
| hsa-miR-3189 NM_022342 | KIF9 | 1 |
| hsa-miR-3192 NM_022342 | KIF9 | 1 |
| hsa-miR-4300 NM_022342 | KIF9 | 1 |
| hsa-miR-4260 NM_022342 | KIF9 | 1 |
| hsa-miR-2355 NM_022342 | KIF9 | 1 |
| hsa-miR-4270 NM_022342 | KIF9 | 1 |
| hsa-miR-4273 NM_022342 | KIF9 | 1 |
| hsa-miR-4277 NM_022342 | KIF9 | 1 |
| hsa-miR-3617 NM_022342 | KIF9 | 1 |
| hsa-miR-3619 NM_022342 | KIF9 | 1 |
| hsa-miR-3620 NM_022342 | KIF9 | 1 |
| hsa-miR-3620 NM_022342 | KIF9 | 1 |
| hsa-miR-3622 NM_022342 | KIF9 | 1 |
| hsa-miR-3664 NM_022342 | KIF9 | 1 |
| hsa-miR-3667 NM_022342 | KIF9 | 1 |
| hsa-miR-3681 NM_022342 | KIF9 | 1 |
| hsa-miR-3682 NM_022342 | KIF9 | 1 |
| hsa-miR-3180 NM_022342 | KIF9 | 1 |
| hsa-miR-378e NM_022342 | KIF9 | 1 |
| hsa-miR-378f NM_022342 | KIF9 | 1 |
| hsa-miR-4421 NM_022342 | KIF9 | 1 |
| hsa-miR-378g NM_022342 | KIF9 | 1 |
| hsa-miR-4425 NM_022342 | KIF9 | 1 |
| hsa-miR-4425 NM_022342 | KIF9 | 1 |
| hsa-miR-4430 NM_022342 | KIF9 | 1 |
| hsa-miR-4438 NM_022342 | KIF9 | 1 |
| hsa-miR-4446 NM_022342 | KIF9 | 1 |
| hsa-miR-4449 NM_022342 | KIF9 | 1 |
| hsa-miR-4453 NM_022342 | KIF9 | 1 |
| hsa-miR-4454 NM_022342 | KIF9 | 1 |
| hsa-miR-4462 NM_022342 | KIF9 | 1 |
| hsa-miR-4478 NM_022342 | KIF9 | 1 |
| hsa-miR-4486 NM_022342 | KIF9 | 1 |
| hsa-miR-4494 NM_022342 | KIF9 | 1 |
| hsa-miR-4510 NM_022342 | KIF9 | 1 |
| hsa-miR-4539 NM_022342 | KIF9 | 1 |
| hsa-miR-4632 NM_022342 | KIF9 | 1 |
| hsa-miR-4633 NM_022342 | KIF9 | 1 |
| hsa-miR-4639 NM_022342 | KIF9 | 1 |
| hsa-miR-4658 NM_022342 | KIF9 | 1 |
| hsa-miR-4660 NM_022342 | KIF9 | 1 |
| hsa-miR-4661 NM_022342 | KIF9 | 1 |
| hsa-miR-4661 NM_022342 | KIF9 | 1 |
| hsa-miR-4665 NM_022342 | KIF9 | 1 |
| hsa-miR-4667 NM_022342 | KIF9 | 1 |
| hsa-miR-4676 NM_022342 | KIF9 | 1 |
| hsa-miR-4676 NM_022342 | KIF9 | 1 |
| hsa-miR-4676 NM_022342 | KIF9 | 1 |
| hsa-miR-4683 NM_022342 | KIF9 | 1 |
| hsa-miR-4685 NM_022342 | KIF9 | 1 |
| hsa-miR-4687 NM_022342 | KIF9 | 1 |
| hsa-miR-1343 NM_022342 | KIF9 | 1 |
| hsa-miR-4688 NM_022342 | KIF9 | 1 |
| hsa-miR-4695 NM_022342 | KIF9 | 1 |
| hsa-miR-4697 NM_022342 | KIF9 | 1 |
| hsa-miR-4701 NM_022342 | KIF9 | 1 |
| hsa-miR-4709 NM_022342 | KIF9 | 1 |
| hsa-miR-4711 NM_022342 | KIF9 | 1 |
| hsa-miR-4727 NM_022342 | KIF9 | 1 |
| hsa-miR-4740 NM_022342 | KIF9 | 1 |
| hsa-miR-4740 NM_022342 | KIF9 | 1 |
| hsa-miR-4743 NM_022342 | KIF9 | 1 |
| hsa-miR-122b NM_022342 | KIF9 | 1 |
| hsa-miR-4749 NM_022342 | KIF9 | 1 |
| hsa-miR-4750 NM_022342 | KIF9 | 1 |
| hsa-miR-4774 NM_022342 | KIF9 | 1 |
| hsa-miR-5002 NM_022342 | KIF9 | 1 |
| hsa-miR-548a NM_022342 | KIF9 | 1 |
| hsa-miR-5007 NM_022342 | KIF9 | 1 |
| hsa-miR-5008 NM_022342 | KIF9 | 1 |
| hsa-miR-5087 NM_022342 | KIF9 | 1 |
| hsa-miR-5088 NM_022342 | KIF9 | 1 |
| hsa-miR-5571 NM_022342 | KIF9 | 1 |
| hsa-miR-5572 NM_022342 | KIF9 | 1 |
| hsa-miR-548a NM_022342 | KIF9 | 1 |
| hsa-miR-5581 NM_022342 | KIF9 | 1 |
| hsa-miR-5584 NM_022342 | KIF9 | 1 |
| hsa-miR-5584 NM_022342 | KIF9 | 1 |
| hsa-miR-5589 NM_022342 | KIF9 | 1 |
| hsa-miR-5591 NM_022342 | KIF9 | 1 |
| hsa-miR-5690 NM_022342 | KIF9 | 1 |
| hsa-miR-5739 NM_022342 | KIF9 | 1 |
| hsa-miR-6070 NM_022342 | KIF9 | 1 |
| hsa-miR-6072 NM_022342 | KIF9 | 1 |
| hsa-miR-6077 NM_022342 | KIF9 | 1 |
| hsa-miR-6088 NM_022342 | KIF9 | 1 |
| hsa-miR-6127 NM_022342 | KIF9 | 1 |
| hsa-miR-6129 NM_022342 | KIF9 | 1 |
| hsa-miR-6165 NM_022342 | KIF9 | 1 |
| hsa-miR-6500 NM_022342 | KIF9 | 1 |
| hsa-miR-6509 NM_022342 | KIF9 | 1 |



|              |            |      |   |
|--------------|------------|------|---|
| hsa-miR-651C | NM_022342  | KIF9 | 1 |
| hsa-miR-6514 | NM_022342  | KIF9 | 1 |
| hsa-miR-6717 | NM_022342  | KIF9 | 1 |
| hsa-miR-6511 | NM_022342  | KIF9 | 1 |
| hsa-miR-6726 | NM_022342  | KIF9 | 1 |
| hsa-miR-6725 | NM_022342  | KIF9 | 1 |
| hsa-miR-6731 | NM_022342  | KIF9 | 1 |
| hsa-miR-6731 | NM_022342  | KIF9 | 1 |
| hsa-miR-6735 | NM_022342  | KIF9 | 1 |
| hsa-miR-6741 | NM_022342  | KIF9 | 1 |
| hsa-miR-6743 | NM_022342  | KIF9 | 1 |
| hsa-miR-6744 | NM_022342  | KIF9 | 1 |
| hsa-miR-6748 | NM_022342  | KIF9 | 1 |
| hsa-miR-6749 | NM_022342  | KIF9 | 1 |
| hsa-miR-6749 | NM_022342  | KIF9 | 1 |
| hsa-miR-6752 | NM_022342  | KIF9 | 1 |
| hsa-miR-6757 | NM_022342  | KIF9 | 1 |
| hsa-miR-6758 | NM_022342  | KIF9 | 1 |
| hsa-miR-6763 | NM_022342  | KIF9 | 1 |
| hsa-miR-6763 | NM_022342  | KIF9 | 1 |
| hsa-miR-6764 | NM_022342  | KIF9 | 1 |
| hsa-miR-6766 | NM_022342  | KIF9 | 1 |
| hsa-miR-6768 | NM_022342  | KIF9 | 1 |
| hsa-miR-6768 | NM_022342  | KIF9 | 1 |
| hsa-miR-6787 | NM_022342  | KIF9 | 1 |
| hsa-miR-6788 | NM_022342  | KIF9 | 1 |
| hsa-miR-679C | NM_022342  | KIF9 | 1 |
| hsa-miR-6791 | NM_022342  | KIF9 | 1 |
| hsa-miR-6796 | NM_022342  | KIF9 | 1 |
| hsa-miR-6797 | NM_022342  | KIF9 | 1 |
| hsa-miR-680C | NM_022342  | KIF9 | 1 |
| hsa-miR-680C | NM_022342  | KIF9 | 1 |
| hsa-miR-6802 | NM_022342  | KIF9 | 1 |
| hsa-miR-6802 | NM_022342  | KIF9 | 1 |
| hsa-miR-6803 | NM_022342  | KIF9 | 1 |
| hsa-miR-6804 | NM_022342  | KIF9 | 1 |
| hsa-miR-6812 | NM_022342  | KIF9 | 1 |
| hsa-miR-6813 | NM_022342  | KIF9 | 1 |
| hsa-miR-6815 | NM_022342  | KIF9 | 1 |
| hsa-miR-6824 | NM_022342  | KIF9 | 1 |
| hsa-miR-6824 | NM_022342  | KIF9 | 1 |
| hsa-miR-6825 | NM_022342  | KIF9 | 1 |
| hsa-miR-6825 | NM_022342  | KIF9 | 1 |
| hsa-miR-6831 | NM_022342  | KIF9 | 1 |
| hsa-miR-6832 | NM_022342  | KIF9 | 1 |
| hsa-miR-6835 | NM_022342  | KIF9 | 1 |
| hsa-miR-6835 | NM_022342  | KIF9 | 1 |
| hsa-miR-684C | NM_022342  | KIF9 | 1 |
| hsa-miR-684C | NM_022342  | KIF9 | 1 |
| hsa-miR-6847 | NM_022342  | KIF9 | 1 |
| hsa-miR-6857 | NM_022342  | KIF9 | 1 |
| hsa-miR-6858 | NM_022342  | KIF9 | 1 |
| hsa-miR-6861 | NM_022342  | KIF9 | 1 |
| hsa-miR-6868 | NM_022342  | KIF9 | 1 |
| hsa-miR-687C | NM_022342  | KIF9 | 1 |
| hsa-miR-687C | NM_022342  | KIF9 | 1 |
| hsa-miR-6876 | NM_022342  | KIF9 | 1 |
| hsa-miR-6878 | NM_022342  | KIF9 | 1 |
| hsa-miR-689C | NM_022342  | KIF9 | 1 |
| hsa-miR-6891 | NM_022342  | KIF9 | 1 |
| hsa-miR-6895 | NM_022342  | KIF9 | 1 |
| hsa-miR-7107 | NM_022342  | KIF9 | 1 |
| hsa-miR-7114 | NM_022342  | KIF9 | 1 |
| hsa-miR-7152 | NM_022342  | KIF9 | 1 |
| hsa-miR-7156 | NM_022342  | KIF9 | 1 |
| hsa-miR-7706 | NM_022342  | KIF9 | 1 |
| hsa-miR-7843 | NM_022342  | KIF9 | 1 |
| hsa-miR-4433 | NM_022342  | KIF9 | 1 |
| hsa-miR-7848 | NM_022342  | KIF9 | 1 |
| hsa-miR-8052 | NM_022342  | KIF9 | 1 |
| hsa-miR-8071 | NM_022342  | KIF9 | 1 |
| hsa-miR-8082 | NM_022342  | KIF9 | 1 |
| hsa-miR-8085 | NM_022342  | KIF9 | 1 |
| hsa-miR-9901 | NM_022342  | KIF9 | 1 |
| hsa-miR-1035 | NM_022342  | KIF9 | 1 |
| hsa-miR-1035 | NM_022342  | KIF9 | 1 |
| hsa-miR-104C | NM_022342  | KIF9 | 1 |
| hsa-miR-1035 | NM_022342  | KIF9 | 1 |
| hsa-miR-1052 | NM_022342  | KIF9 | 1 |
| hsa-miR-1118 | NM_022342  | KIF9 | 1 |
| hsa-miR-1135 | NM_022342  | KIF9 | 1 |
| hsa-miR-3059 | NM_022342  | KIF9 | 1 |
| hsa-miR-6525 | NM_022342  | KIF9 | 1 |
| hsa-miR-1211 | NM_022342  | KIF9 | 1 |
| hsa-miR-1213 | NM_022342  | KIF9 | 1 |
| hsa-miR-511- | NM_0013774 | KIF9 | 1 |
| hsa-miR-317C | NM_0013774 | KIF9 | 1 |
| hsa-miR-550b | NM_0013774 | KIF9 | 1 |
| hsa-miR-4723 | NM_0013774 | KIF9 | 1 |
| hsa-miR-6073 | NM_0013774 | KIF9 | 1 |
| hsa-miR-6818 | NM_0013774 | KIF9 | 1 |
| hsa-miR-6828 | NM_0013774 | KIF9 | 1 |
| hsa-miR-6854 | NM_0013774 | KIF9 | 1 |
| hsa-miR-511- | NM_0013774 | KIF9 | 1 |

|                               |   |
|-------------------------------|---|
| hsa-miR-550a NM_0013774 KIF9  | 1 |
| hsa-miR-550b NM_0013774 KIF9  | 1 |
| hsa-miR-6073 NM_0013774 KIF9  | 1 |
| hsa-let-7e-5p NM_0011348 KIF9 | 1 |
| hsa-miR-17-5j NM_0011348 KIF9 | 1 |
| hsa-miR-24-1 NM_0011348 KIF9  | 1 |
| hsa-miR-24-3j NM_0011348 KIF9 | 1 |
| hsa-miR-24-3j NM_0011348 KIF9 | 1 |
| hsa-miR-25-3j NM_0011348 KIF9 | 1 |
| hsa-miR-93-3j NM_0011348 KIF9 | 1 |
| hsa-miR-197- NM_0011348 KIF9  | 1 |
| hsa-miR-197- NM_0011348 KIF9  | 1 |
| hsa-miR-197- NM_0011348 KIF9  | 1 |
| hsa-miR-129- NM_0011348 KIF9  | 1 |
| hsa-miR-211- NM_0011348 KIF9  | 1 |
| hsa-miR-143- NM_0011348 KIF9  | 1 |
| hsa-miR-127- NM_0011348 KIF9  | 1 |
| hsa-miR-129- NM_0011348 KIF9  | 1 |
| hsa-miR-149- NM_0011348 KIF9  | 1 |
| hsa-miR-185- NM_0011348 KIF9  | 1 |
| hsa-miR-188- NM_0011348 KIF9  | 1 |
| hsa-miR-320a NM_0011348 KIF9  | 1 |
| hsa-miR-301a NM_0011348 KIF9  | 1 |
| hsa-miR-296- NM_0011348 KIF9  | 1 |
| hsa-miR-130b NM_0011348 KIF9  | 1 |
| hsa-miR-370- NM_0011348 KIF9  | 1 |
| hsa-miR-377- NM_0011348 KIF9  | 1 |
| hsa-miR-381- NM_0011348 KIF9  | 1 |
| hsa-miR-326 NM_0011348 KIF9   | 1 |
| hsa-miR-338- NM_0011348 KIF9  | 1 |
| hsa-miR-422a NM_0011348 KIF9  | 1 |
| hsa-miR-423- NM_0011348 KIF9  | 1 |
| hsa-miR-20b- NM_0011348 KIF9  | 1 |
| hsa-miR-20b- NM_0011348 KIF9  | 1 |
| hsa-miR-489- NM_0011348 KIF9  | 1 |
| hsa-miR-146b NM_0011348 KIF9  | 1 |
| hsa-miR-520c NM_0011348 KIF9  | 1 |
| hsa-miR-501- NM_0011348 KIF9  | 1 |
| hsa-miR-502- NM_0011348 KIF9  | 1 |
| hsa-miR-504- NM_0011348 KIF9  | 1 |
| hsa-miR-509- NM_0011348 KIF9  | 1 |
| hsa-miR-557 NM_0011348 KIF9   | 1 |
| hsa-miR-574- NM_0011348 KIF9  | 1 |
| hsa-miR-550a NM_0011348 KIF9  | 1 |
| hsa-miR-602 NM_0011348 KIF9   | 1 |
| hsa-miR-609 NM_0011348 KIF9   | 1 |
| hsa-miR-612 NM_0011348 KIF9   | 1 |
| hsa-miR-622 NM_0011348 KIF9   | 1 |
| hsa-miR-627- NM_0011348 KIF9  | 1 |
| hsa-miR-650 NM_0011348 KIF9   | 1 |
| hsa-miR-449b NM_0011348 KIF9  | 1 |
| hsa-miR-668- NM_0011348 KIF9  | 1 |
| hsa-miR-550a NM_0011348 KIF9  | 1 |
| hsa-miR-378d NM_0011348 KIF9  | 1 |
| hsa-miR-670- NM_0011348 KIF9  | 1 |
| hsa-miR-541- NM_0011348 KIF9  | 1 |
| hsa-miR-936 NM_0011348 KIF9   | 1 |
| hsa-miR-937- NM_0011348 KIF9  | 1 |
| hsa-miR-1178 NM_0011348 KIF9  | 1 |
| hsa-miR-1182 NM_0011348 KIF9  | 1 |
| hsa-miR-1228 NM_0011348 KIF9  | 1 |
| hsa-miR-1202 NM_0011348 KIF9  | 1 |
| hsa-miR-663b NM_0011348 KIF9  | 1 |
| hsa-miR-1207 NM_0011348 KIF9  | 1 |
| hsa-miR-1208 NM_0011348 KIF9  | 1 |
| hsa-miR-1295 NM_0011348 KIF9  | 1 |
| hsa-miR-126c NM_0011348 KIF9  | 1 |
| hsa-miR-1268 NM_0011348 KIF9  | 1 |
| hsa-miR-1281 NM_0011348 KIF9  | 1 |
| hsa-miR-664a NM_0011348 KIF9  | 1 |
| hsa-miR-1306 NM_0011348 KIF9  | 1 |
| hsa-miR-1471 NM_0011348 KIF9  | 1 |
| hsa-miR-1912 NM_0011348 KIF9  | 1 |
| hsa-miR-2116 NM_0011348 KIF9  | 1 |
| hsa-miR-2116 NM_0011348 KIF9  | 1 |
| hsa-miR-2681 NM_0011348 KIF9  | 1 |
| hsa-miR-2681 NM_0011348 KIF9  | 1 |
| hsa-miR-2682 NM_0011348 KIF9  | 1 |
| hsa-miR-2861 NM_0011348 KIF9  | 1 |
| hsa-miR-378b NM_0011348 KIF9  | 1 |
| hsa-miR-3135 NM_0011348 KIF9  | 1 |
| hsa-miR-3141 NM_0011348 KIF9  | 1 |
| hsa-miR-3158 NM_0011348 KIF9  | 1 |
| hsa-miR-126c NM_0011348 KIF9  | 1 |
| hsa-miR-3173 NM_0011348 KIF9  | 1 |
| hsa-miR-323b NM_0011348 KIF9  | 1 |
| hsa-miR-318c NM_0011348 KIF9  | 1 |
| hsa-miR-3189 NM_0011348 KIF9  | 1 |
| hsa-miR-4297 NM_0011348 KIF9  | 1 |
| hsa-miR-430c NM_0011348 KIF9  | 1 |
| hsa-miR-426c NM_0011348 KIF9  | 1 |
| hsa-miR-4327 NM_0011348 KIF9  | 1 |
| hsa-miR-4277 NM_0011348 KIF9  | 1 |
| hsa-miR-4277 NM_0011348 KIF9  | 1 |

|                              |   |
|------------------------------|---|
| hsa-miR-4283 NM_0011348 KIF9 | 1 |
| hsa-miR-433C NM_0011348 KIF9 | 1 |
| hsa-miR-3619 NM_0011348 KIF9 | 1 |
| hsa-miR-362C NM_0011348 KIF9 | 1 |
| hsa-miR-362C NM_0011348 KIF9 | 1 |
| hsa-miR-3622 NM_0011348 KIF9 | 1 |
| hsa-miR-3664 NM_0011348 KIF9 | 1 |
| hsa-miR-3667 NM_0011348 KIF9 | 1 |
| hsa-miR-3678 NM_0011348 KIF9 | 1 |
| hsa-miR-3681 NM_0011348 KIF9 | 1 |
| hsa-miR-3682 NM_0011348 KIF9 | 1 |
| hsa-miR-3691 NM_0011348 KIF9 | 1 |
| hsa-miR-318C NM_0011348 KIF9 | 1 |
| hsa-miR-3937 NM_0011348 KIF9 | 1 |
| hsa-miR-1268 NM_0011348 KIF9 | 1 |
| hsa-miR-378e NM_0011348 KIF9 | 1 |
| hsa-miR-378f NM_0011348 KIF9 | 1 |
| hsa-miR-4421 NM_0011348 KIF9 | 1 |
| hsa-miR-4421 NM_0011348 KIF9 | 1 |
| hsa-miR-4421 NM_0011348 KIF9 | 1 |
| hsa-miR-378g NM_0011348 KIF9 | 1 |
| hsa-miR-4425 NM_0011348 KIF9 | 1 |
| hsa-miR-4433 NM_0011348 KIF9 | 1 |
| hsa-miR-4446 NM_0011348 KIF9 | 1 |
| hsa-miR-4446 NM_0011348 KIF9 | 1 |
| hsa-miR-4447 NM_0011348 KIF9 | 1 |
| hsa-miR-4453 NM_0011348 KIF9 | 1 |
| hsa-miR-4454 NM_0011348 KIF9 | 1 |
| hsa-miR-4462 NM_0011348 KIF9 | 1 |
| hsa-miR-4486 NM_0011348 KIF9 | 1 |
| hsa-miR-4494 NM_0011348 KIF9 | 1 |
| hsa-miR-451C NM_0011348 KIF9 | 1 |
| hsa-miR-4523 NM_0011348 KIF9 | 1 |
| hsa-miR-4525 NM_0011348 KIF9 | 1 |
| hsa-miR-4538 NM_0011348 KIF9 | 1 |
| hsa-miR-4632 NM_0011348 KIF9 | 1 |
| hsa-miR-4633 NM_0011348 KIF9 | 1 |
| hsa-miR-4649 NM_0011348 KIF9 | 1 |
| hsa-miR-465C NM_0011348 KIF9 | 1 |
| hsa-miR-4653 NM_0011348 KIF9 | 1 |
| hsa-miR-466C NM_0011348 KIF9 | 1 |
| hsa-miR-4661 NM_0011348 KIF9 | 1 |
| hsa-miR-4667 NM_0011348 KIF9 | 1 |
| hsa-miR-4673 NM_0011348 KIF9 | 1 |
| hsa-miR-4676 NM_0011348 KIF9 | 1 |
| hsa-miR-4685 NM_0011348 KIF9 | 1 |
| hsa-miR-4685 NM_0011348 KIF9 | 1 |
| hsa-miR-4695 NM_0011348 KIF9 | 1 |
| hsa-miR-4695 NM_0011348 KIF9 | 1 |
| hsa-miR-4701 NM_0011348 KIF9 | 1 |
| hsa-miR-4711 NM_0011348 KIF9 | 1 |
| hsa-miR-4715 NM_0011348 KIF9 | 1 |
| hsa-miR-4717 NM_0011348 KIF9 | 1 |
| hsa-miR-4726 NM_0011348 KIF9 | 1 |
| hsa-miR-4728 NM_0011348 KIF9 | 1 |
| hsa-miR-4728 NM_0011348 KIF9 | 1 |
| hsa-miR-4733 NM_0011348 KIF9 | 1 |
| hsa-miR-474C NM_0011348 KIF9 | 1 |
| hsa-miR-474C NM_0011348 KIF9 | 1 |
| hsa-miR-4758 NM_0011348 KIF9 | 1 |
| hsa-miR-4776 NM_0011348 KIF9 | 1 |
| hsa-miR-2467 NM_0011348 KIF9 | 1 |
| hsa-miR-548a NM_0011348 KIF9 | 1 |
| hsa-miR-5194 NM_0011348 KIF9 | 1 |
| hsa-miR-5195 NM_0011348 KIF9 | 1 |
| hsa-miR-5572 NM_0011348 KIF9 | 1 |
| hsa-miR-548a NM_0011348 KIF9 | 1 |
| hsa-miR-5581 NM_0011348 KIF9 | 1 |
| hsa-miR-5591 NM_0011348 KIF9 | 1 |
| hsa-miR-569C NM_0011348 KIF9 | 1 |
| hsa-miR-5698 NM_0011348 KIF9 | 1 |
| hsa-miR-607C NM_0011348 KIF9 | 1 |
| hsa-miR-609C NM_0011348 KIF9 | 1 |
| hsa-miR-6127 NM_0011348 KIF9 | 1 |
| hsa-miR-6129 NM_0011348 KIF9 | 1 |
| hsa-miR-6165 NM_0011348 KIF9 | 1 |
| hsa-miR-650C NM_0011348 KIF9 | 1 |
| hsa-miR-6504 NM_0011348 KIF9 | 1 |
| hsa-miR-6509 NM_0011348 KIF9 | 1 |
| hsa-miR-6511 NM_0011348 KIF9 | 1 |
| hsa-miR-6511 NM_0011348 KIF9 | 1 |
| hsa-miR-6729 NM_0011348 KIF9 | 1 |
| hsa-miR-673C NM_0011348 KIF9 | 1 |
| hsa-miR-673C NM_0011348 KIF9 | 1 |
| hsa-miR-6731 NM_0011348 KIF9 | 1 |
| hsa-miR-6731 NM_0011348 KIF9 | 1 |
| hsa-miR-6732 NM_0011348 KIF9 | 1 |
| hsa-miR-6735 NM_0011348 KIF9 | 1 |
| hsa-miR-6735 NM_0011348 KIF9 | 1 |
| hsa-miR-6744 NM_0011348 KIF9 | 1 |
| hsa-miR-6748 NM_0011348 KIF9 | 1 |
| hsa-miR-675C NM_0011348 KIF9 | 1 |
| hsa-miR-6757 NM_0011348 KIF9 | 1 |
| hsa-miR-6759 NM_0011348 KIF9 | 1 |

|                                |            |
|--------------------------------|------------|
| hsa-miR-6761 NM_0011348 KIF9   | 1          |
| hsa-miR-6762 NM_0011348 KIF9   | 1          |
| hsa-miR-6764 NM_0011348 KIF9   | 1          |
| hsa-miR-6768 NM_0011348 KIF9   | 1          |
| hsa-miR-6770 NM_0011348 KIF9   | 1          |
| hsa-miR-6780 NM_0011348 KIF9   | 1          |
| hsa-miR-6784 NM_0011348 KIF9   | 1          |
| hsa-miR-6785 NM_0011348 KIF9   | 1          |
| hsa-miR-6787 NM_0011348 KIF9   | 1          |
| hsa-miR-6788 NM_0011348 KIF9   | 1          |
| hsa-miR-6791 NM_0011348 KIF9   | 1          |
| hsa-miR-6796 NM_0011348 KIF9   | 1          |
| hsa-miR-6797 NM_0011348 KIF9   | 1          |
| hsa-miR-6800 NM_0011348 KIF9   | 1          |
| hsa-miR-6800 NM_0011348 KIF9   | 1          |
| hsa-miR-6801 NM_0011348 KIF9   | 1          |
| hsa-miR-6802 NM_0011348 KIF9   | 1          |
| hsa-miR-6802 NM_0011348 KIF9   | 1          |
| hsa-miR-6804 NM_0011348 KIF9   | 1          |
| hsa-miR-6817 NM_0011348 KIF9   | 1          |
| hsa-miR-6819 NM_0011348 KIF9   | 1          |
| hsa-miR-6824 NM_0011348 KIF9   | 1          |
| hsa-miR-6824 NM_0011348 KIF9   | 1          |
| hsa-miR-6825 NM_0011348 KIF9   | 1          |
| hsa-miR-6831 NM_0011348 KIF9   | 1          |
| hsa-miR-6835 NM_0011348 KIF9   | 1          |
| hsa-miR-6835 NM_0011348 KIF9   | 1          |
| hsa-miR-6840 NM_0011348 KIF9   | 1          |
| hsa-miR-6840 NM_0011348 KIF9   | 1          |
| hsa-miR-6847 NM_0011348 KIF9   | 1          |
| hsa-miR-6857 NM_0011348 KIF9   | 1          |
| hsa-miR-6858 NM_0011348 KIF9   | 1          |
| hsa-miR-6868 NM_0011348 KIF9   | 1          |
| hsa-miR-6870 NM_0011348 KIF9   | 1          |
| hsa-miR-6878 NM_0011348 KIF9   | 1          |
| hsa-miR-6879 NM_0011348 KIF9   | 1          |
| hsa-miR-6890 NM_0011348 KIF9   | 1          |
| hsa-miR-6895 NM_0011348 KIF9   | 1          |
| hsa-miR-7107 NM_0011348 KIF9   | 1          |
| hsa-miR-7114 NM_0011348 KIF9   | 1          |
| hsa-miR-7150 NM_0011348 KIF9   | 1          |
| hsa-miR-7706 NM_0011348 KIF9   | 1          |
| hsa-miR-4433 NM_0011348 KIF9   | 1          |
| hsa-miR-7848 NM_0011348 KIF9   | 1          |
| hsa-miR-8052 NM_0011348 KIF9   | 1          |
| hsa-miR-8060 NM_0011348 KIF9   | 1          |
| hsa-miR-8071 NM_0011348 KIF9   | 1          |
| hsa-miR-9898 NM_0011348 KIF9   | 1          |
| hsa-miR-9901 NM_0011348 KIF9   | 1          |
| hsa-miR-1039 NM_0011348 KIF9   | 1          |
| hsa-miR-1039 NM_0011348 KIF9   | 1          |
| hsa-miR-1040 NM_0011348 KIF9   | 1          |
| hsa-miR-3059 NM_0011348 KIF9   | 1          |
| hsa-miR-1211 NM_0011348 KIF9   | 1          |
| hsa-miR-1211 NM_0011348 KIF9   | 1          |
| hsa-miR-5580 NM_0013201 NRXN1  | 0.95384615 |
| hsa-miR-6088 NM_0013201 NRXN1  | 0.95384615 |
| hsa-miR-6830 NM_0013201 NRXN1  | 0.95384615 |
| hsa-miR-2392 NM_0013201 NRXN1  | 0.95384615 |
| hsa-miR-4650 NM_0013201 NRXN1  | 0.95384615 |
| hsa-miR-5580 NM_0013201 NRXN1  | 0.95384615 |
| hsa-miR-6088 NM_0013201 NRXN1  | 0.95384615 |
| hsa-miR-6830 NM_0013201 NRXN1  | 0.95384615 |
| hsa-miR-4489 NM_0013300 NRXN1  | 0.95384615 |
| hsa-miR-101-; NM_0013300 NRXN1 | 0.95384615 |
| hsa-miR-15a-; NM_0011356 NRXN1 | 0.95384615 |
| hsa-miR-574-; NM_138735 NRXN1  | 0.95604396 |
| hsa-miR-574-; NM_0013201 NRXN1 | 0.95604396 |
| hsa-miR-574-; NM_0013201 NRXN1 | 0.95604396 |
| hsa-miR-17-3j; NM_138735 NRXN1 | 0.96153846 |
| hsa-miR-214-; NM_138735 NRXN1  | 0.96153846 |
| hsa-miR-138-; NM_138735 NRXN1  | 0.96153846 |
| hsa-miR-516a; NM_138735 NRXN1  | 0.96153846 |
| hsa-miR-657; NM_138735 NRXN1   | 0.96153846 |
| hsa-miR-3193; NM_138735 NRXN1  | 0.96153846 |
| hsa-miR-5691; NM_138735 NRXN1  | 0.96153846 |
| hsa-miR-6499; NM_138735 NRXN1  | 0.96153846 |
| hsa-miR-8072; NM_138735 NRXN1  | 0.96153846 |
| hsa-miR-1212; NM_138735 NRXN1  | 0.96153846 |
| hsa-miR-516a; NM_004801 NRXN1  | 0.96153846 |
| hsa-miR-657; NM_004801 NRXN1   | 0.96153846 |
| hsa-miR-4499; NM_004801 NRXN1  | 0.96153846 |
| hsa-miR-6731; NM_004801 NRXN1  | 0.96153846 |
| hsa-miR-6772; NM_004801 NRXN1  | 0.96153846 |
| hsa-miR-138-; NM_0013201 NRXN1 | 0.96153846 |
| hsa-miR-185-; NM_0013201 NRXN1 | 0.96153846 |
| hsa-miR-380-; NM_0013201 NRXN1 | 0.96153846 |
| hsa-miR-520b; NM_0013201 NRXN1 | 0.96153846 |
| hsa-miR-519a; NM_0013201 NRXN1 | 0.96153846 |
| hsa-miR-629-; NM_0013201 NRXN1 | 0.96153846 |
| hsa-miR-1247; NM_0013201 NRXN1 | 0.96153846 |
| hsa-miR-3131; NM_0013201 NRXN1 | 0.96153846 |
| hsa-miR-3137; NM_0013201 NRXN1 | 0.96153846 |
| hsa-miR-4510; NM_0013201 NRXN1 | 0.96153846 |
| hsa-miR-4655; NM_0013201 NRXN1 | 0.96153846 |



|                               |            |
|-------------------------------|------------|
| hsa-miR-4257 NM_004801 NRXN1  | 0.97435897 |
| hsa-miR-7151 NM_0013201 NRXN1 | 0.97435897 |
| hsa-miR-4257 NM_0013300 NRXN1 | 0.97435897 |
| hsa-miR-4257 NM_0013300 NRXN1 | 0.97435897 |
| hsa-miR-526t NM_0013300 NRXN1 | 0.97435897 |
| hsa-miR-3074 NM_0013300 NRXN1 | 0.97435897 |
| hsa-miR-4704 NM_0013300 NRXN1 | 0.97435897 |
| hsa-miR-526t NM_0013300 NRXN1 | 0.97435897 |
| hsa-miR-3178 NM_0013300 NRXN1 | 0.97435897 |
| hsa-miR-4704 NM_0013300 NRXN1 | 0.97435897 |
| hsa-miR-4257 NM_0013300 NRXN1 | 0.97435897 |
| hsa-miR-526t NM_0013300 NRXN1 | 0.97435897 |
| hsa-miR-4704 NM_0013300 NRXN1 | 0.97435897 |
| hsa-miR-6075 NM_0013300 NRXN1 | 0.97435897 |
| hsa-miR-1-5p NM_0013300 NRXN1 | 0.97435897 |
| hsa-miR-1-5p NM_0013300 NRXN1 | 0.97435897 |
| hsa-miR-4257 NM_0011356 NRXN1 | 0.97435897 |
| hsa-miR-125a NM_0013201 NRXN1 | 0.97435897 |
| hsa-miR-125a NM_0013201 NRXN1 | 0.97435897 |
| hsa-miR-5705 NM_0013300 NRXN1 | 0.97435897 |
| hsa-miR-423- NM_0013201 NRXN1 | 0.98076923 |
| hsa-miR-621 NM_0013300 NRXN1  | 0.98076923 |
| hsa-miR-6804 NM_0013300 NRXN1 | 0.98076923 |
| hsa-miR-621 NM_0013300 NRXN1  | 0.98076923 |
| hsa-miR-6804 NM_0013300 NRXN1 | 0.98076923 |
| hsa-miR-6804 NM_0013300 NRXN1 | 0.98076923 |
| hsa-let-7b-5p NM_138735 NRXN1 | 1          |
| hsa-let-7c-3p NM_138735 NRXN1 | 1          |
| hsa-miR-16-5j NM_138735 NRXN1 | 1          |
| hsa-miR-25-3j NM_138735 NRXN1 | 1          |
| hsa-miR-92a- NM_138735 NRXN1  | 1          |
| hsa-miR-101- NM_138735 NRXN1  | 1          |
| hsa-miR-198 NM_138735 NRXN1   | 1          |
| hsa-miR-139- NM_138735 NRXN1  | 1          |
| hsa-miR-182- NM_138735 NRXN1  | 1          |
| hsa-miR-203a NM_138735 NRXN1  | 1          |
| hsa-miR-205- NM_138735 NRXN1  | 1          |
| hsa-miR-212- NM_138735 NRXN1  | 1          |
| hsa-miR-214- NM_138735 NRXN1  | 1          |
| hsa-miR-1-3p NM_138735 NRXN1  | 1          |
| hsa-miR-15b- NM_138735 NRXN1  | 1          |
| hsa-miR-124- NM_138735 NRXN1  | 1          |
| hsa-miR-133a NM_138735 NRXN1  | 1          |
| hsa-miR-134- NM_138735 NRXN1  | 1          |
| hsa-miR-101- NM_138735 NRXN1  | 1          |
| hsa-miR-302t NM_138735 NRXN1  | 1          |
| hsa-miR-370- NM_138735 NRXN1  | 1          |
| hsa-miR-382- NM_138735 NRXN1  | 1          |
| hsa-miR-133t NM_138735 NRXN1  | 1          |
| hsa-miR-487a NM_138735 NRXN1  | 1          |
| hsa-miR-491- NM_138735 NRXN1  | 1          |
| hsa-miR-497- NM_138735 NRXN1  | 1          |
| hsa-miR-517- NM_138735 NRXN1  | 1          |
| hsa-miR-510- NM_138735 NRXN1  | 1          |
| hsa-miR-455- NM_138735 NRXN1  | 1          |
| hsa-miR-487t NM_138735 NRXN1  | 1          |
| hsa-miR-584- NM_138735 NRXN1  | 1          |
| hsa-miR-548t NM_138735 NRXN1  | 1          |
| hsa-miR-605- NM_138735 NRXN1  | 1          |
| hsa-miR-629- NM_138735 NRXN1  | 1          |
| hsa-miR-644a NM_138735 NRXN1  | 1          |
| hsa-miR-548d NM_138735 NRXN1  | 1          |
| hsa-miR-758- NM_138735 NRXN1  | 1          |
| hsa-miR-1283 NM_138735 NRXN1  | 1          |
| hsa-miR-761 NM_138735 NRXN1   | 1          |
| hsa-miR-761 NM_138735 NRXN1   | 1          |
| hsa-miR-887- NM_138735 NRXN1  | 1          |
| hsa-miR-922 NM_138735 NRXN1   | 1          |
| hsa-miR-922 NM_138735 NRXN1   | 1          |
| hsa-miR-1208 NM_138735 NRXN1  | 1          |
| hsa-miR-1250 NM_138735 NRXN1  | 1          |
| hsa-miR-548n NM_138735 NRXN1  | 1          |
| hsa-miR-103t NM_138735 NRXN1  | 1          |
| hsa-miR-1912 NM_138735 NRXN1  | 1          |
| hsa-miR-2115 NM_138735 NRXN1  | 1          |
| hsa-miR-3120 NM_138735 NRXN1  | 1          |
| hsa-miR-3129 NM_138735 NRXN1  | 1          |
| hsa-miR-3200 NM_138735 NRXN1  | 1          |
| hsa-miR-4309 NM_138735 NRXN1  | 1          |
| hsa-miR-4257 NM_138735 NRXN1  | 1          |
| hsa-miR-4277 NM_138735 NRXN1  | 1          |
| hsa-miR-3613 NM_138735 NRXN1  | 1          |
| hsa-miR-3691 NM_138735 NRXN1  | 1          |
| hsa-miR-3913 NM_138735 NRXN1  | 1          |
| hsa-miR-3926 NM_138735 NRXN1  | 1          |
| hsa-miR-374c NM_138735 NRXN1  | 1          |
| hsa-miR-548a NM_138735 NRXN1  | 1          |
| hsa-miR-4430 NM_138735 NRXN1  | 1          |
| hsa-miR-548a NM_138735 NRXN1  | 1          |
| hsa-miR-4435 NM_138735 NRXN1  | 1          |
| hsa-miR-548a NM_138735 NRXN1  | 1          |
| hsa-miR-548a NM_138735 NRXN1  | 1          |
| hsa-miR-4487 NM_138735 NRXN1  | 1          |
| hsa-miR-4520 NM_138735 NRXN1  | 1          |

|                         |       |   |
|-------------------------|-------|---|
| hsa-miR-4527 NM_138735  | NRXN1 | 1 |
| hsa-miR-219b NM_138735  | NRXN1 | 1 |
| hsa-miR-4672 NM_138735  | NRXN1 | 1 |
| hsa-miR-4695 NM_138735  | NRXN1 | 1 |
| hsa-miR-4700 NM_138735  | NRXN1 | 1 |
| hsa-miR-4714 NM_138735  | NRXN1 | 1 |
| hsa-miR-4718 NM_138735  | NRXN1 | 1 |
| hsa-miR-4520 NM_138735  | NRXN1 | 1 |
| hsa-miR-4725 NM_138735  | NRXN1 | 1 |
| hsa-miR-4743 NM_138735  | NRXN1 | 1 |
| hsa-miR-4751 NM_138735  | NRXN1 | 1 |
| hsa-miR-4755 NM_138735  | NRXN1 | 1 |
| hsa-miR-4768 NM_138735  | NRXN1 | 1 |
| hsa-miR-4788 NM_138735  | NRXN1 | 1 |
| hsa-miR-4802 NM_138735  | NRXN1 | 1 |
| hsa-miR-5000 NM_138735  | NRXN1 | 1 |
| hsa-miR-5005 NM_138735  | NRXN1 | 1 |
| hsa-miR-5197 NM_138735  | NRXN1 | 1 |
| hsa-miR-5579 NM_138735  | NRXN1 | 1 |
| hsa-miR-4666 NM_138735  | NRXN1 | 1 |
| hsa-miR-6072 NM_138735  | NRXN1 | 1 |
| hsa-miR-548a NM_138735  | NRXN1 | 1 |
| hsa-miR-548a NM_138735  | NRXN1 | 1 |
| hsa-miR-6513 NM_138735  | NRXN1 | 1 |
| hsa-miR-6717 NM_138735  | NRXN1 | 1 |
| hsa-miR-6511 NM_138735  | NRXN1 | 1 |
| hsa-miR-892c NM_138735  | NRXN1 | 1 |
| hsa-miR-6755 NM_138735  | NRXN1 | 1 |
| hsa-miR-6758 NM_138735  | NRXN1 | 1 |
| hsa-miR-6767 NM_138735  | NRXN1 | 1 |
| hsa-miR-6788 NM_138735  | NRXN1 | 1 |
| hsa-miR-6798 NM_138735  | NRXN1 | 1 |
| hsa-miR-6800 NM_138735  | NRXN1 | 1 |
| hsa-miR-6805 NM_138735  | NRXN1 | 1 |
| hsa-miR-6815 NM_138735  | NRXN1 | 1 |
| hsa-miR-6833 NM_138735  | NRXN1 | 1 |
| hsa-miR-6835 NM_138735  | NRXN1 | 1 |
| hsa-miR-6864 NM_138735  | NRXN1 | 1 |
| hsa-miR-6873 NM_138735  | NRXN1 | 1 |
| hsa-miR-6876 NM_138735  | NRXN1 | 1 |
| hsa-miR-7106 NM_138735  | NRXN1 | 1 |
| hsa-miR-7851 NM_138735  | NRXN1 | 1 |
| hsa-miR-8060 NM_138735  | NRXN1 | 1 |
| hsa-miR-8088 NM_138735  | NRXN1 | 1 |
| hsa-miR-1035 NM_138735  | NRXN1 | 1 |
| hsa-miR-1212 NM_138735  | NRXN1 | 1 |
| hsa-let-7b-5p NM_004801 | NRXN1 | 1 |
| hsa-let-7c-3p NM_004801 | NRXN1 | 1 |
| hsa-miR-25-3j NM_004801 | NRXN1 | 1 |
| hsa-miR-92a- NM_004801  | NRXN1 | 1 |
| hsa-miR-139- NM_004801  | NRXN1 | 1 |
| hsa-miR-203a NM_004801  | NRXN1 | 1 |
| hsa-miR-212- NM_004801  | NRXN1 | 1 |
| hsa-miR-214- NM_004801  | NRXN1 | 1 |
| hsa-miR-133a NM_004801  | NRXN1 | 1 |
| hsa-miR-138- NM_004801  | NRXN1 | 1 |
| hsa-miR-134- NM_004801  | NRXN1 | 1 |
| hsa-miR-136- NM_004801  | NRXN1 | 1 |
| hsa-miR-382- NM_004801  | NRXN1 | 1 |
| hsa-miR-133b NM_004801  | NRXN1 | 1 |
| hsa-miR-483- NM_004801  | NRXN1 | 1 |
| hsa-miR-487a NM_004801  | NRXN1 | 1 |
| hsa-miR-488- NM_004801  | NRXN1 | 1 |
| hsa-miR-491- NM_004801  | NRXN1 | 1 |
| hsa-miR-517- NM_004801  | NRXN1 | 1 |
| hsa-miR-521 NM_004801   | NRXN1 | 1 |
| hsa-miR-518e NM_004801  | NRXN1 | 1 |
| hsa-miR-518e NM_004801  | NRXN1 | 1 |
| hsa-miR-518a NM_004801  | NRXN1 | 1 |
| hsa-miR-487b NM_004801  | NRXN1 | 1 |
| hsa-miR-584- NM_004801  | NRXN1 | 1 |
| hsa-miR-624- NM_004801  | NRXN1 | 1 |
| hsa-miR-629- NM_004801  | NRXN1 | 1 |
| hsa-miR-758- NM_004801  | NRXN1 | 1 |
| hsa-miR-758- NM_004801  | NRXN1 | 1 |
| hsa-miR-1301 NM_004801  | NRXN1 | 1 |
| hsa-miR-1283 NM_004801  | NRXN1 | 1 |
| hsa-miR-922 NM_004801   | NRXN1 | 1 |
| hsa-miR-1250 NM_004801  | NRXN1 | 1 |
| hsa-miR-103b NM_004801  | NRXN1 | 1 |
| hsa-miR-3162 NM_004801  | NRXN1 | 1 |
| hsa-miR-3189 NM_004801  | NRXN1 | 1 |
| hsa-miR-3200 NM_004801  | NRXN1 | 1 |
| hsa-miR-3202 NM_004801  | NRXN1 | 1 |
| hsa-miR-3606 NM_004801  | NRXN1 | 1 |
| hsa-miR-3667 NM_004801  | NRXN1 | 1 |
| hsa-miR-3691 NM_004801  | NRXN1 | 1 |
| hsa-miR-3913 NM_004801  | NRXN1 | 1 |
| hsa-miR-3915 NM_004801  | NRXN1 | 1 |
| hsa-miR-3926 NM_004801  | NRXN1 | 1 |
| hsa-miR-4424 NM_004801  | NRXN1 | 1 |
| hsa-miR-4435 NM_004801  | NRXN1 | 1 |
| hsa-miR-4455 NM_004801  | NRXN1 | 1 |
| hsa-miR-4652 NM_004801  | NRXN1 | 1 |

|                 |            |       |   |
|-----------------|------------|-------|---|
| hsa-miR-219t    | NM_004801  | NRXN1 | 1 |
| hsa-miR-4672    | NM_004801  | NRXN1 | 1 |
| hsa-miR-4725    | NM_004801  | NRXN1 | 1 |
| hsa-miR-4743    | NM_004801  | NRXN1 | 1 |
| hsa-miR-4751    | NM_004801  | NRXN1 | 1 |
| hsa-miR-4755    | NM_004801  | NRXN1 | 1 |
| hsa-miR-4781    | NM_004801  | NRXN1 | 1 |
| hsa-miR-4794    | NM_004801  | NRXN1 | 1 |
| hsa-miR-4796    | NM_004801  | NRXN1 | 1 |
| hsa-miR-5005    | NM_004801  | NRXN1 | 1 |
| hsa-miR-5584    | NM_004801  | NRXN1 | 1 |
| hsa-miR-1295    | NM_004801  | NRXN1 | 1 |
| hsa-miR-4666    | NM_004801  | NRXN1 | 1 |
| hsa-miR-6072    | NM_004801  | NRXN1 | 1 |
| hsa-miR-6512    | NM_004801  | NRXN1 | 1 |
| hsa-miR-6513    | NM_004801  | NRXN1 | 1 |
| hsa-miR-892c    | NM_004801  | NRXN1 | 1 |
| hsa-miR-674C    | NM_004801  | NRXN1 | 1 |
| hsa-miR-6767    | NM_004801  | NRXN1 | 1 |
| hsa-miR-6788    | NM_004801  | NRXN1 | 1 |
| hsa-miR-679C    | NM_004801  | NRXN1 | 1 |
| hsa-miR-6822    | NM_004801  | NRXN1 | 1 |
| hsa-miR-6835    | NM_004801  | NRXN1 | 1 |
| hsa-miR-6852    | NM_004801  | NRXN1 | 1 |
| hsa-miR-6873    | NM_004801  | NRXN1 | 1 |
| hsa-miR-7155    | NM_004801  | NRXN1 | 1 |
| hsa-miR-7851    | NM_004801  | NRXN1 | 1 |
| hsa-miR-7854    | NM_004801  | NRXN1 | 1 |
| hsa-miR-806C    | NM_004801  | NRXN1 | 1 |
| hsa-let-7a-2-3  | NM_0013201 | NRXN1 | 1 |
| hsa-let-7b-5p   | NM_0013201 | NRXN1 | 1 |
| hsa-let-7b-3p   | NM_0013201 | NRXN1 | 1 |
| hsa-let-7e-3p   | NM_0013201 | NRXN1 | 1 |
| hsa-let-7f-1-3j | NM_0013201 | NRXN1 | 1 |
| hsa-let-7f-1-3j | NM_0013201 | NRXN1 | 1 |
| hsa-miR-15a-    | NM_0013201 | NRXN1 | 1 |
| hsa-miR-15a-    | NM_0013201 | NRXN1 | 1 |
| hsa-miR-17-3j   | NM_0013201 | NRXN1 | 1 |
| hsa-miR-22-5j   | NM_0013201 | NRXN1 | 1 |
| hsa-miR-23a-    | NM_0013201 | NRXN1 | 1 |
| hsa-miR-24-3j   | NM_0013201 | NRXN1 | 1 |
| hsa-miR-25-3j   | NM_0013201 | NRXN1 | 1 |
| hsa-miR-31-5j   | NM_0013201 | NRXN1 | 1 |
| hsa-miR-92a-    | NM_0013201 | NRXN1 | 1 |
| hsa-miR-92a-    | NM_0013201 | NRXN1 | 1 |
| hsa-miR-93-3j   | NM_0013201 | NRXN1 | 1 |
| hsa-miR-30c-    | NM_0013201 | NRXN1 | 1 |
| hsa-miR-139-    | NM_0013201 | NRXN1 | 1 |
| hsa-miR-147a    | NM_0013201 | NRXN1 | 1 |
| hsa-miR-182-    | NM_0013201 | NRXN1 | 1 |
| hsa-miR-182-    | NM_0013201 | NRXN1 | 1 |
| hsa-miR-203a    | NM_0013201 | NRXN1 | 1 |
| hsa-miR-204-    | NM_0013201 | NRXN1 | 1 |
| hsa-miR-205-    | NM_0013201 | NRXN1 | 1 |
| hsa-miR-211-    | NM_0013201 | NRXN1 | 1 |
| hsa-miR-214-    | NM_0013201 | NRXN1 | 1 |
| hsa-miR-215-    | NM_0013201 | NRXN1 | 1 |
| hsa-miR-217-    | NM_0013201 | NRXN1 | 1 |
| hsa-miR-222-    | NM_0013201 | NRXN1 | 1 |
| hsa-miR-30b-    | NM_0013201 | NRXN1 | 1 |
| hsa-miR-124-    | NM_0013201 | NRXN1 | 1 |
| hsa-miR-125t    | NM_0013201 | NRXN1 | 1 |
| hsa-miR-125t    | NM_0013201 | NRXN1 | 1 |
| hsa-miR-135a    | NM_0013201 | NRXN1 | 1 |
| hsa-miR-191-    | NM_0013201 | NRXN1 | 1 |
| hsa-miR-134-    | NM_0013201 | NRXN1 | 1 |
| hsa-miR-149-    | NM_0013201 | NRXN1 | 1 |
| hsa-miR-149-    | NM_0013201 | NRXN1 | 1 |
| hsa-miR-29c-    | NM_0013201 | NRXN1 | 1 |
| hsa-miR-30c-    | NM_0013201 | NRXN1 | 1 |
| hsa-miR-200a    | NM_0013201 | NRXN1 | 1 |
| hsa-miR-302a    | NM_0013201 | NRXN1 | 1 |
| hsa-miR-365t    | NM_0013201 | NRXN1 | 1 |
| hsa-miR-370-    | NM_0013201 | NRXN1 | 1 |
| hsa-miR-377-    | NM_0013201 | NRXN1 | 1 |
| hsa-miR-378a    | NM_0013201 | NRXN1 | 1 |
| hsa-miR-382-    | NM_0013201 | NRXN1 | 1 |
| hsa-miR-383-    | NM_0013201 | NRXN1 | 1 |
| hsa-miR-342-    | NM_0013201 | NRXN1 | 1 |
| hsa-miR-326     | NM_0013201 | NRXN1 | 1 |
| hsa-miR-151a    | NM_0013201 | NRXN1 | 1 |
| hsa-miR-335-    | NM_0013201 | NRXN1 | 1 |
| hsa-miR-345-    | NM_0013201 | NRXN1 | 1 |
| hsa-miR-346     | NM_0013201 | NRXN1 | 1 |
| hsa-miR-423-    | NM_0013201 | NRXN1 | 1 |
| hsa-miR-450a    | NM_0013201 | NRXN1 | 1 |
| hsa-miR-409-    | NM_0013201 | NRXN1 | 1 |
| hsa-miR-483-    | NM_0013201 | NRXN1 | 1 |
| hsa-miR-485-    | NM_0013201 | NRXN1 | 1 |
| hsa-miR-487a    | NM_0013201 | NRXN1 | 1 |
| hsa-miR-487a    | NM_0013201 | NRXN1 | 1 |
| hsa-miR-490-    | NM_0013201 | NRXN1 | 1 |
| hsa-miR-490-    | NM_0013201 | NRXN1 | 1 |
| hsa-miR-193t    | NM_0013201 | NRXN1 | 1 |



|                               |   |
|-------------------------------|---|
| hsa-miR-497- NM_0013201 NRXN1 | 1 |
| hsa-miR-497- NM_0013201 NRXN1 | 1 |
| hsa-miR-520f NM_0013201 NRXN1 | 1 |
| hsa-miR-526t NM_0013201 NRXN1 | 1 |
| hsa-miR-525- NM_0013201 NRXN1 | 1 |
| hsa-miR-523- NM_0013201 NRXN1 | 1 |
| hsa-miR-518f NM_0013201 NRXN1 | 1 |
| hsa-miR-526a NM_0013201 NRXN1 | 1 |
| hsa-miR-518c NM_0013201 NRXN1 | 1 |
| hsa-miR-517- NM_0013201 NRXN1 | 1 |
| hsa-miR-519d NM_0013201 NRXN1 | 1 |
| hsa-miR-521 NM_0013201 NRXN1  | 1 |
| hsa-miR-518e NM_0013201 NRXN1 | 1 |
| hsa-miR-518a NM_0013201 NRXN1 | 1 |
| hsa-miR-518a NM_0013201 NRXN1 | 1 |
| hsa-miR-518d NM_0013201 NRXN1 | 1 |
| hsa-miR-516a NM_0013201 NRXN1 | 1 |
| hsa-miR-504- NM_0013201 NRXN1 | 1 |
| hsa-miR-506- NM_0013201 NRXN1 | 1 |
| hsa-miR-508- NM_0013201 NRXN1 | 1 |
| hsa-miR-509- NM_0013201 NRXN1 | 1 |
| hsa-miR-509- NM_0013201 NRXN1 | 1 |
| hsa-miR-510- NM_0013201 NRXN1 | 1 |
| hsa-miR-455- NM_0013201 NRXN1 | 1 |
| hsa-miR-487t NM_0013201 NRXN1 | 1 |
| hsa-miR-567 NM_0013201 NRXN1  | 1 |
| hsa-miR-584- NM_0013201 NRXN1 | 1 |
| hsa-miR-548t NM_0013201 NRXN1 | 1 |
| hsa-miR-593- NM_0013201 NRXN1 | 1 |
| hsa-miR-605- NM_0013201 NRXN1 | 1 |
| hsa-miR-625- NM_0013201 NRXN1 | 1 |
| hsa-miR-629- NM_0013201 NRXN1 | 1 |
| hsa-miR-33b- NM_0013201 NRXN1 | 1 |
| hsa-miR-642a NM_0013201 NRXN1 | 1 |
| hsa-miR-647 NM_0013201 NRXN1  | 1 |
| hsa-miR-652- NM_0013201 NRXN1 | 1 |
| hsa-miR-548d NM_0013201 NRXN1 | 1 |
| hsa-miR-656- NM_0013201 NRXN1 | 1 |
| hsa-miR-549a NM_0013201 NRXN1 | 1 |
| hsa-miR-657 NM_0013201 NRXN1  | 1 |
| hsa-miR-668- NM_0013201 NRXN1 | 1 |
| hsa-miR-550a NM_0013201 NRXN1 | 1 |
| hsa-miR-1271 NM_0013201 NRXN1 | 1 |
| hsa-miR-1301 NM_0013201 NRXN1 | 1 |
| hsa-miR-1301 NM_0013201 NRXN1 | 1 |
| hsa-miR-1301 NM_0013201 NRXN1 | 1 |
| hsa-miR-1283 NM_0013201 NRXN1 | 1 |
| hsa-miR-670- NM_0013201 NRXN1 | 1 |
| hsa-miR-761 NM_0013201 NRXN1  | 1 |
| hsa-miR-761 NM_0013201 NRXN1  | 1 |
| hsa-miR-298 NM_0013201 NRXN1  | 1 |
| hsa-miR-891a NM_0013201 NRXN1 | 1 |
| hsa-miR-892a NM_0013201 NRXN1 | 1 |
| hsa-miR-892t NM_0013201 NRXN1 | 1 |
| hsa-miR-887- NM_0013201 NRXN1 | 1 |
| hsa-miR-665 NM_0013201 NRXN1  | 1 |
| hsa-miR-301t NM_0013201 NRXN1 | 1 |
| hsa-miR-922 NM_0013201 NRXN1  | 1 |
| hsa-miR-1226 NM_0013201 NRXN1 | 1 |
| hsa-miR-1227 NM_0013201 NRXN1 | 1 |
| hsa-miR-1227 NM_0013201 NRXN1 | 1 |
| hsa-miR-1225 NM_0013201 NRXN1 | 1 |
| hsa-miR-1237 NM_0013201 NRXN1 | 1 |
| hsa-miR-1205 NM_0013201 NRXN1 | 1 |
| hsa-miR-1208 NM_0013201 NRXN1 | 1 |
| hsa-miR-1285 NM_0013201 NRXN1 | 1 |
| hsa-miR-1285 NM_0013201 NRXN1 | 1 |
| hsa-miR-1295 NM_0013201 NRXN1 | 1 |
| hsa-miR-1248 NM_0013201 NRXN1 | 1 |
| hsa-miR-1248 NM_0013201 NRXN1 | 1 |
| hsa-miR-1250 NM_0013201 NRXN1 | 1 |
| hsa-miR-1251 NM_0013201 NRXN1 | 1 |
| hsa-miR-1251 NM_0013201 NRXN1 | 1 |
| hsa-miR-1256 NM_0013201 NRXN1 | 1 |
| hsa-miR-548n NM_0013201 NRXN1 | 1 |
| hsa-miR-1266 NM_0013201 NRXN1 | 1 |
| hsa-miR-1275 NM_0013201 NRXN1 | 1 |
| hsa-miR-1275 NM_0013201 NRXN1 | 1 |
| hsa-miR-302e NM_0013201 NRXN1 | 1 |
| hsa-miR-1292 NM_0013201 NRXN1 | 1 |
| hsa-miR-1306 NM_0013201 NRXN1 | 1 |
| hsa-miR-1322 NM_0013201 NRXN1 | 1 |
| hsa-miR-1465 NM_0013201 NRXN1 | 1 |
| hsa-miR-103t NM_0013201 NRXN1 | 1 |
| hsa-miR-1908 NM_0013201 NRXN1 | 1 |
| hsa-miR-211c NM_0013201 NRXN1 | 1 |
| hsa-miR-718 NM_0013201 NRXN1  | 1 |
| hsa-miR-312c NM_0013201 NRXN1 | 1 |
| hsa-miR-312c NM_0013201 NRXN1 | 1 |
| hsa-miR-3125 NM_0013201 NRXN1 | 1 |
| hsa-miR-3125 NM_0013201 NRXN1 | 1 |
| hsa-miR-3125 NM_0013201 NRXN1 | 1 |
| hsa-miR-313c NM_0013201 NRXN1 | 1 |
| hsa-miR-3138 NM_0013201 NRXN1 | 1 |

|                               |   |
|-------------------------------|---|
| hsa-miR-548t NM_0013201 NRXN1 | 1 |
| hsa-miR-3141 NM_0013201 NRXN1 | 1 |
| hsa-miR-548v NM_0013201 NRXN1 | 1 |
| hsa-miR-316C NM_0013201 NRXN1 | 1 |
| hsa-miR-3174 NM_0013201 NRXN1 | 1 |
| hsa-miR-3175 NM_0013201 NRXN1 | 1 |
| hsa-miR-3193 NM_0013201 NRXN1 | 1 |
| hsa-miR-3194 NM_0013201 NRXN1 | 1 |
| hsa-miR-3195 NM_0013201 NRXN1 | 1 |
| hsa-miR-320C NM_0013201 NRXN1 | 1 |
| hsa-miR-3202 NM_0013201 NRXN1 | 1 |
| hsa-miR-430C NM_0013201 NRXN1 | 1 |
| hsa-miR-4308 NM_0013201 NRXN1 | 1 |
| hsa-miR-4314 NM_0013201 NRXN1 | 1 |
| hsa-miR-4257 NM_0013201 NRXN1 | 1 |
| hsa-miR-4271 NM_0013201 NRXN1 | 1 |
| hsa-miR-4281 NM_0013201 NRXN1 | 1 |
| hsa-miR-4277 NM_0013201 NRXN1 | 1 |
| hsa-miR-4278 NM_0013201 NRXN1 | 1 |
| hsa-miR-429C NM_0013201 NRXN1 | 1 |
| hsa-miR-361C NM_0013201 NRXN1 | 1 |
| hsa-miR-3613 NM_0013201 NRXN1 | 1 |
| hsa-miR-368C NM_0013201 NRXN1 | 1 |
| hsa-miR-3691 NM_0013201 NRXN1 | 1 |
| hsa-miR-3913 NM_0013201 NRXN1 | 1 |
| hsa-miR-3922 NM_0013201 NRXN1 | 1 |
| hsa-miR-3922 NM_0013201 NRXN1 | 1 |
| hsa-miR-3926 NM_0013201 NRXN1 | 1 |
| hsa-miR-3926 NM_0013201 NRXN1 | 1 |
| hsa-miR-3934 NM_0013201 NRXN1 | 1 |
| hsa-miR-3944 NM_0013201 NRXN1 | 1 |
| hsa-miR-3944 NM_0013201 NRXN1 | 1 |
| hsa-miR-374c NM_0013201 NRXN1 | 1 |
| hsa-miR-642b NM_0013201 NRXN1 | 1 |
| hsa-miR-550b NM_0013201 NRXN1 | 1 |
| hsa-miR-548a NM_0013201 NRXN1 | 1 |
| hsa-miR-548a NM_0013201 NRXN1 | 1 |
| hsa-miR-4424 NM_0013201 NRXN1 | 1 |
| hsa-miR-4428 NM_0013201 NRXN1 | 1 |
| hsa-miR-4425 NM_0013201 NRXN1 | 1 |
| hsa-miR-443C NM_0013201 NRXN1 | 1 |
| hsa-miR-548a NM_0013201 NRXN1 | 1 |
| hsa-miR-4435 NM_0013201 NRXN1 | 1 |
| hsa-miR-548a NM_0013201 NRXN1 | 1 |
| hsa-miR-4435 NM_0013201 NRXN1 | 1 |
| hsa-miR-4443 NM_0013201 NRXN1 | 1 |
| hsa-miR-548a NM_0013201 NRXN1 | 1 |
| hsa-miR-4458 NM_0013201 NRXN1 | 1 |
| hsa-miR-4465 NM_0013201 NRXN1 | 1 |
| hsa-miR-3685 NM_0013201 NRXN1 | 1 |
| hsa-miR-4487 NM_0013201 NRXN1 | 1 |
| hsa-miR-4485 NM_0013201 NRXN1 | 1 |
| hsa-miR-4491 NM_0013201 NRXN1 | 1 |
| hsa-miR-4493 NM_0013201 NRXN1 | 1 |
| hsa-miR-4496 NM_0013201 NRXN1 | 1 |
| hsa-miR-4498 NM_0013201 NRXN1 | 1 |
| hsa-miR-4495 NM_0013201 NRXN1 | 1 |
| hsa-miR-4505 NM_0013201 NRXN1 | 1 |
| hsa-miR-4513 NM_0013201 NRXN1 | 1 |
| hsa-miR-452C NM_0013201 NRXN1 | 1 |
| hsa-miR-3972 NM_0013201 NRXN1 | 1 |
| hsa-miR-4632 NM_0013201 NRXN1 | 1 |
| hsa-miR-4633 NM_0013201 NRXN1 | 1 |
| hsa-miR-4633 NM_0013201 NRXN1 | 1 |
| hsa-miR-4646 NM_0013201 NRXN1 | 1 |
| hsa-miR-4645 NM_0013201 NRXN1 | 1 |
| hsa-miR-465C NM_0013201 NRXN1 | 1 |
| hsa-miR-4652 NM_0013201 NRXN1 | 1 |
| hsa-miR-466C NM_0013201 NRXN1 | 1 |
| hsa-miR-4661 NM_0013201 NRXN1 | 1 |
| hsa-miR-4665 NM_0013201 NRXN1 | 1 |
| hsa-miR-4667 NM_0013201 NRXN1 | 1 |
| hsa-miR-4667 NM_0013201 NRXN1 | 1 |
| hsa-miR-4668 NM_0013201 NRXN1 | 1 |
| hsa-miR-219b NM_0013201 NRXN1 | 1 |
| hsa-miR-4665 NM_0013201 NRXN1 | 1 |
| hsa-miR-4671 NM_0013201 NRXN1 | 1 |
| hsa-miR-4672 NM_0013201 NRXN1 | 1 |
| hsa-miR-4687 NM_0013201 NRXN1 | 1 |
| hsa-miR-4691 NM_0013201 NRXN1 | 1 |
| hsa-miR-4692 NM_0013201 NRXN1 | 1 |
| hsa-miR-4695 NM_0013201 NRXN1 | 1 |
| hsa-miR-470C NM_0013201 NRXN1 | 1 |
| hsa-miR-470C NM_0013201 NRXN1 | 1 |
| hsa-miR-4707 NM_0013201 NRXN1 | 1 |
| hsa-miR-4714 NM_0013201 NRXN1 | 1 |
| hsa-miR-4715 NM_0013201 NRXN1 | 1 |
| hsa-miR-4716 NM_0013201 NRXN1 | 1 |
| hsa-miR-472C NM_0013201 NRXN1 | 1 |
| hsa-miR-4722 NM_0013201 NRXN1 | 1 |
| hsa-miR-452C NM_0013201 NRXN1 | 1 |
| hsa-miR-4723 NM_0013201 NRXN1 | 1 |
| hsa-miR-4724 NM_0013201 NRXN1 | 1 |
| hsa-miR-4727 NM_0013201 NRXN1 | 1 |



|                                  |   |
|----------------------------------|---|
| hsa-miR-6791 NM_0013201 NRXN1    | 1 |
| hsa-miR-6794 NM_0013201 NRXN1    | 1 |
| hsa-miR-6795 NM_0013201 NRXN1    | 1 |
| hsa-miR-6795 NM_0013201 NRXN1    | 1 |
| hsa-miR-6797 NM_0013201 NRXN1    | 1 |
| hsa-miR-6800 NM_0013201 NRXN1    | 1 |
| hsa-miR-6802 NM_0013201 NRXN1    | 1 |
| hsa-miR-6803 NM_0013201 NRXN1    | 1 |
| hsa-miR-6806 NM_0013201 NRXN1    | 1 |
| hsa-miR-6808 NM_0013201 NRXN1    | 1 |
| hsa-miR-6810 NM_0013201 NRXN1    | 1 |
| hsa-miR-6812 NM_0013201 NRXN1    | 1 |
| hsa-miR-6812 NM_0013201 NRXN1    | 1 |
| hsa-miR-6813 NM_0013201 NRXN1    | 1 |
| hsa-miR-6813 NM_0013201 NRXN1    | 1 |
| hsa-miR-6822 NM_0013201 NRXN1    | 1 |
| hsa-miR-6826 NM_0013201 NRXN1    | 1 |
| hsa-miR-6828 NM_0013201 NRXN1    | 1 |
| hsa-miR-6830 NM_0013201 NRXN1    | 1 |
| hsa-miR-6834 NM_0013201 NRXN1    | 1 |
| hsa-miR-6840 NM_0013201 NRXN1    | 1 |
| hsa-miR-6845 NM_0013201 NRXN1    | 1 |
| hsa-miR-6846 NM_0013201 NRXN1    | 1 |
| hsa-miR-6846 NM_0013201 NRXN1    | 1 |
| hsa-miR-6847 NM_0013201 NRXN1    | 1 |
| hsa-miR-6849 NM_0013201 NRXN1    | 1 |
| hsa-miR-6849 NM_0013201 NRXN1    | 1 |
| hsa-miR-6854 NM_0013201 NRXN1    | 1 |
| hsa-miR-6854 NM_0013201 NRXN1    | 1 |
| hsa-miR-6857 NM_0013201 NRXN1    | 1 |
| hsa-miR-6857 NM_0013201 NRXN1    | 1 |
| hsa-miR-6769 NM_0013201 NRXN1    | 1 |
| hsa-miR-6862 NM_0013201 NRXN1    | 1 |
| hsa-miR-6867 NM_0013201 NRXN1    | 1 |
| hsa-miR-6870 NM_0013201 NRXN1    | 1 |
| hsa-miR-6875 NM_0013201 NRXN1    | 1 |
| hsa-miR-6878 NM_0013201 NRXN1    | 1 |
| hsa-miR-6879 NM_0013201 NRXN1    | 1 |
| hsa-miR-6886 NM_0013201 NRXN1    | 1 |
| hsa-miR-6887 NM_0013201 NRXN1    | 1 |
| hsa-miR-6887 NM_0013201 NRXN1    | 1 |
| hsa-miR-6889 NM_0013201 NRXN1    | 1 |
| hsa-miR-6890 NM_0013201 NRXN1    | 1 |
| hsa-miR-6892 NM_0013201 NRXN1    | 1 |
| hsa-miR-6894 NM_0013201 NRXN1    | 1 |
| hsa-miR-6895 NM_0013201 NRXN1    | 1 |
| hsa-miR-7108 NM_0013201 NRXN1    | 1 |
| hsa-miR-7109 NM_0013201 NRXN1    | 1 |
| hsa-miR-7110 NM_0013201 NRXN1    | 1 |
| hsa-miR-7111 NM_0013201 NRXN1    | 1 |
| hsa-miR-7111 NM_0013201 NRXN1    | 1 |
| hsa-miR-7111 NM_0013201 NRXN1    | 1 |
| hsa-miR-7113 NM_0013201 NRXN1    | 1 |
| hsa-miR-7153 NM_0013201 NRXN1    | 1 |
| hsa-miR-7154 NM_0013201 NRXN1    | 1 |
| hsa-miR-7158 NM_0013201 NRXN1    | 1 |
| hsa-miR-7851 NM_0013201 NRXN1    | 1 |
| hsa-miR-7852 NM_0013201 NRXN1    | 1 |
| hsa-miR-7854 NM_0013201 NRXN1    | 1 |
| hsa-miR-8055 NM_0013201 NRXN1    | 1 |
| hsa-miR-8057 NM_0013201 NRXN1    | 1 |
| hsa-miR-8063 NM_0013201 NRXN1    | 1 |
| hsa-miR-8082 NM_0013201 NRXN1    | 1 |
| hsa-miR-8085 NM_0013201 NRXN1    | 1 |
| hsa-miR-8089 NM_0013201 NRXN1    | 1 |
| hsa-miR-9986 NM_0013201 NRXN1    | 1 |
| hsa-miR-1040 NM_0013201 NRXN1    | 1 |
| hsa-miR-9851 NM_0013201 NRXN1    | 1 |
| hsa-miR-1211 NM_0013201 NRXN1    | 1 |
| hsa-miR-1212 NM_0013201 NRXN1    | 1 |
| hsa-let-7a-2-3 NM_0013201 NRXN1  | 1 |
| hsa-let-7b-5p NM_0013201 NRXN1   | 1 |
| hsa-let-7b-3p NM_0013201 NRXN1   | 1 |
| hsa-let-7e-3p NM_0013201 NRXN1   | 1 |
| hsa-let-7f-1-3j NM_0013201 NRXN1 | 1 |
| hsa-let-7f-1-3j NM_0013201 NRXN1 | 1 |
| hsa-miR-15a- NM_0013201 NRXN1    | 1 |
| hsa-miR-22-5j NM_0013201 NRXN1   | 1 |
| hsa-miR-23a- NM_0013201 NRXN1    | 1 |
| hsa-miR-24-3j NM_0013201 NRXN1   | 1 |
| hsa-miR-27a- NM_0013201 NRXN1    | 1 |
| hsa-miR-31-5j NM_0013201 NRXN1   | 1 |
| hsa-miR-92a- NM_0013201 NRXN1    | 1 |
| hsa-miR-92a- NM_0013201 NRXN1    | 1 |
| hsa-miR-30c- NM_0013201 NRXN1    | 1 |
| hsa-miR-139- NM_0013201 NRXN1    | 1 |
| hsa-miR-147a NM_0013201 NRXN1    | 1 |
| hsa-miR-182- NM_0013201 NRXN1    | 1 |
| hsa-miR-182- NM_0013201 NRXN1    | 1 |
| hsa-miR-203a NM_0013201 NRXN1    | 1 |
| hsa-miR-204- NM_0013201 NRXN1    | 1 |
| hsa-miR-205- NM_0013201 NRXN1    | 1 |
| hsa-miR-211- NM_0013201 NRXN1    | 1 |
| hsa-miR-214- NM_0013201 NRXN1    | 1 |

|                         |       |   |
|-------------------------|-------|---|
| hsa-miR-222-NM_0013201  | NRXN1 | 1 |
| hsa-miR-30b-NM_0013201  | NRXN1 | 1 |
| hsa-miR-124-NM_0013201  | NRXN1 | 1 |
| hsa-miR-125t-NM_0013201 | NRXN1 | 1 |
| hsa-miR-125t-NM_0013201 | NRXN1 | 1 |
| hsa-miR-135a-NM_0013201 | NRXN1 | 1 |
| hsa-miR-191-NM_0013201  | NRXN1 | 1 |
| hsa-miR-134-NM_0013201  | NRXN1 | 1 |
| hsa-miR-149-NM_0013201  | NRXN1 | 1 |
| hsa-miR-149-NM_0013201  | NRXN1 | 1 |
| hsa-miR-29c-NM_0013201  | NRXN1 | 1 |
| hsa-miR-30c-NM_0013201  | NRXN1 | 1 |
| hsa-miR-200a-NM_0013201 | NRXN1 | 1 |
| hsa-miR-302a-NM_0013201 | NRXN1 | 1 |
| hsa-miR-101-NM_0013201  | NRXN1 | 1 |
| hsa-miR-299-NM_0013201  | NRXN1 | 1 |
| hsa-miR-365t-NM_0013201 | NRXN1 | 1 |
| hsa-miR-370-NM_0013201  | NRXN1 | 1 |
| hsa-miR-377-NM_0013201  | NRXN1 | 1 |
| hsa-miR-378a-NM_0013201 | NRXN1 | 1 |
| hsa-miR-382-NM_0013201  | NRXN1 | 1 |
| hsa-miR-383-NM_0013201  | NRXN1 | 1 |
| hsa-miR-342-NM_0013201  | NRXN1 | 1 |
| hsa-miR-326-NM_0013201  | NRXN1 | 1 |
| hsa-miR-335-NM_0013201  | NRXN1 | 1 |
| hsa-miR-345-NM_0013201  | NRXN1 | 1 |
| hsa-miR-346-NM_0013201  | NRXN1 | 1 |
| hsa-miR-423-NM_0013201  | NRXN1 | 1 |
| hsa-miR-450a-NM_0013201 | NRXN1 | 1 |
| hsa-miR-409-NM_0013201  | NRXN1 | 1 |
| hsa-miR-485-NM_0013201  | NRXN1 | 1 |
| hsa-miR-485-NM_0013201  | NRXN1 | 1 |
| hsa-miR-487a-NM_0013201 | NRXN1 | 1 |
| hsa-miR-487a-NM_0013201 | NRXN1 | 1 |
| hsa-miR-490-NM_0013201  | NRXN1 | 1 |
| hsa-miR-490-NM_0013201  | NRXN1 | 1 |
| hsa-miR-511-NM_0013201  | NRXN1 | 1 |
| hsa-miR-193t-NM_0013201 | NRXN1 | 1 |
| hsa-miR-497-NM_0013201  | NRXN1 | 1 |
| hsa-miR-497-NM_0013201  | NRXN1 | 1 |
| hsa-miR-520f-NM_0013201 | NRXN1 | 1 |
| hsa-miR-526t-NM_0013201 | NRXN1 | 1 |
| hsa-miR-525-NM_0013201  | NRXN1 | 1 |
| hsa-miR-523-NM_0013201  | NRXN1 | 1 |
| hsa-miR-518f-NM_0013201 | NRXN1 | 1 |
| hsa-miR-517-NM_0013201  | NRXN1 | 1 |
| hsa-miR-519d-NM_0013201 | NRXN1 | 1 |
| hsa-miR-521-NM_0013201  | NRXN1 | 1 |
| hsa-miR-518e-NM_0013201 | NRXN1 | 1 |
| hsa-miR-518a-NM_0013201 | NRXN1 | 1 |
| hsa-miR-518a-NM_0013201 | NRXN1 | 1 |
| hsa-miR-518d-NM_0013201 | NRXN1 | 1 |
| hsa-miR-518d-NM_0013201 | NRXN1 | 1 |
| hsa-miR-516a-NM_0013201 | NRXN1 | 1 |
| hsa-miR-504-NM_0013201  | NRXN1 | 1 |
| hsa-miR-506-NM_0013201  | NRXN1 | 1 |
| hsa-miR-508-NM_0013201  | NRXN1 | 1 |
| hsa-miR-509-NM_0013201  | NRXN1 | 1 |
| hsa-miR-509-NM_0013201  | NRXN1 | 1 |
| hsa-miR-510-NM_0013201  | NRXN1 | 1 |
| hsa-miR-455-NM_0013201  | NRXN1 | 1 |
| hsa-miR-487t-NM_0013201 | NRXN1 | 1 |
| hsa-miR-567-NM_0013201  | NRXN1 | 1 |
| hsa-miR-584-NM_0013201  | NRXN1 | 1 |
| hsa-miR-585-NM_0013201  | NRXN1 | 1 |
| hsa-miR-548t-NM_0013201 | NRXN1 | 1 |
| hsa-miR-605-NM_0013201  | NRXN1 | 1 |
| hsa-miR-625-NM_0013201  | NRXN1 | 1 |
| hsa-miR-629-NM_0013201  | NRXN1 | 1 |
| hsa-miR-33b-NM_0013201  | NRXN1 | 1 |
| hsa-miR-647-NM_0013201  | NRXN1 | 1 |
| hsa-miR-652-NM_0013201  | NRXN1 | 1 |
| hsa-miR-548d-NM_0013201 | NRXN1 | 1 |
| hsa-miR-656-NM_0013201  | NRXN1 | 1 |
| hsa-miR-657-NM_0013201  | NRXN1 | 1 |
| hsa-miR-671-NM_0013201  | NRXN1 | 1 |
| hsa-miR-668-NM_0013201  | NRXN1 | 1 |
| hsa-miR-550a-NM_0013201 | NRXN1 | 1 |
| hsa-miR-767-NM_0013201  | NRXN1 | 1 |
| hsa-miR-1271-NM_0013201 | NRXN1 | 1 |
| hsa-miR-1301-NM_0013201 | NRXN1 | 1 |
| hsa-miR-1283-NM_0013201 | NRXN1 | 1 |
| hsa-miR-670-NM_0013201  | NRXN1 | 1 |
| hsa-miR-761-NM_0013201  | NRXN1 | 1 |
| hsa-miR-761-NM_0013201  | NRXN1 | 1 |
| hsa-miR-761-NM_0013201  | NRXN1 | 1 |
| hsa-miR-765-NM_0013201  | NRXN1 | 1 |
| hsa-miR-298-NM_0013201  | NRXN1 | 1 |
| hsa-miR-891a-NM_0013201 | NRXN1 | 1 |
| hsa-miR-892t-NM_0013201 | NRXN1 | 1 |
| hsa-miR-887-NM_0013201  | NRXN1 | 1 |
| hsa-miR-665-NM_0013201  | NRXN1 | 1 |

|              |            |       |   |
|--------------|------------|-------|---|
| hsa-miR-374b | NM_0013201 | NRXN1 | 1 |
| hsa-miR-922  | NM_0013201 | NRXN1 | 1 |
| hsa-miR-1226 | NM_0013201 | NRXN1 | 1 |
| hsa-miR-1227 | NM_0013201 | NRXN1 | 1 |
| hsa-miR-1227 | NM_0013201 | NRXN1 | 1 |
| hsa-miR-1228 | NM_0013201 | NRXN1 | 1 |
| hsa-miR-1229 | NM_0013201 | NRXN1 | 1 |
| hsa-miR-1233 | NM_0013201 | NRXN1 | 1 |
| hsa-miR-1237 | NM_0013201 | NRXN1 | 1 |
| hsa-miR-1205 | NM_0013201 | NRXN1 | 1 |
| hsa-miR-1208 | NM_0013201 | NRXN1 | 1 |
| hsa-miR-1208 | NM_0013201 | NRXN1 | 1 |
| hsa-miR-1285 | NM_0013201 | NRXN1 | 1 |
| hsa-miR-1289 | NM_0013201 | NRXN1 | 1 |
| hsa-miR-1295 | NM_0013201 | NRXN1 | 1 |
| hsa-miR-1303 | NM_0013201 | NRXN1 | 1 |
| hsa-miR-1248 | NM_0013201 | NRXN1 | 1 |
| hsa-miR-1248 | NM_0013201 | NRXN1 | 1 |
| hsa-miR-1250 | NM_0013201 | NRXN1 | 1 |
| hsa-miR-1251 | NM_0013201 | NRXN1 | 1 |
| hsa-miR-1251 | NM_0013201 | NRXN1 | 1 |
| hsa-miR-1256 | NM_0013201 | NRXN1 | 1 |
| hsa-miR-548n | NM_0013201 | NRXN1 | 1 |
| hsa-miR-1266 | NM_0013201 | NRXN1 | 1 |
| hsa-miR-1275 | NM_0013201 | NRXN1 | 1 |
| hsa-miR-1275 | NM_0013201 | NRXN1 | 1 |
| hsa-miR-302e | NM_0013201 | NRXN1 | 1 |
| hsa-miR-1306 | NM_0013201 | NRXN1 | 1 |
| hsa-miR-1322 | NM_0013201 | NRXN1 | 1 |
| hsa-miR-1469 | NM_0013201 | NRXN1 | 1 |
| hsa-miR-103b | NM_0013201 | NRXN1 | 1 |
| hsa-miR-1908 | NM_0013201 | NRXN1 | 1 |
| hsa-miR-2110 | NM_0013201 | NRXN1 | 1 |
| hsa-miR-2115 | NM_0013201 | NRXN1 | 1 |
| hsa-miR-718  | NM_0013201 | NRXN1 | 1 |
| hsa-miR-3120 | NM_0013201 | NRXN1 | 1 |
| hsa-miR-3120 | NM_0013201 | NRXN1 | 1 |
| hsa-miR-3125 | NM_0013201 | NRXN1 | 1 |
| hsa-miR-3125 | NM_0013201 | NRXN1 | 1 |
| hsa-miR-3125 | NM_0013201 | NRXN1 | 1 |
| hsa-miR-3130 | NM_0013201 | NRXN1 | 1 |
| hsa-miR-544b | NM_0013201 | NRXN1 | 1 |
| hsa-miR-3138 | NM_0013201 | NRXN1 | 1 |
| hsa-miR-548t | NM_0013201 | NRXN1 | 1 |
| hsa-miR-3141 | NM_0013201 | NRXN1 | 1 |
| hsa-miR-3150 | NM_0013201 | NRXN1 | 1 |
| hsa-miR-3160 | NM_0013201 | NRXN1 | 1 |
| hsa-miR-3174 | NM_0013201 | NRXN1 | 1 |
| hsa-miR-3175 | NM_0013201 | NRXN1 | 1 |
| hsa-miR-3193 | NM_0013201 | NRXN1 | 1 |
| hsa-miR-3194 | NM_0013201 | NRXN1 | 1 |
| hsa-miR-3199 | NM_0013201 | NRXN1 | 1 |
| hsa-miR-3200 | NM_0013201 | NRXN1 | 1 |
| hsa-miR-3202 | NM_0013201 | NRXN1 | 1 |
| hsa-miR-4300 | NM_0013201 | NRXN1 | 1 |
| hsa-miR-4308 | NM_0013201 | NRXN1 | 1 |
| hsa-miR-4314 | NM_0013201 | NRXN1 | 1 |
| hsa-miR-4257 | NM_0013201 | NRXN1 | 1 |
| hsa-miR-4271 | NM_0013201 | NRXN1 | 1 |
| hsa-miR-4277 | NM_0013201 | NRXN1 | 1 |
| hsa-miR-4278 | NM_0013201 | NRXN1 | 1 |
| hsa-miR-4290 | NM_0013201 | NRXN1 | 1 |
| hsa-miR-3613 | NM_0013201 | NRXN1 | 1 |
| hsa-miR-3664 | NM_0013201 | NRXN1 | 1 |
| hsa-miR-3680 | NM_0013201 | NRXN1 | 1 |
| hsa-miR-3691 | NM_0013201 | NRXN1 | 1 |
| hsa-miR-3691 | NM_0013201 | NRXN1 | 1 |
| hsa-miR-3913 | NM_0013201 | NRXN1 | 1 |
| hsa-miR-3922 | NM_0013201 | NRXN1 | 1 |
| hsa-miR-3922 | NM_0013201 | NRXN1 | 1 |
| hsa-miR-3926 | NM_0013201 | NRXN1 | 1 |
| hsa-miR-3934 | NM_0013201 | NRXN1 | 1 |
| hsa-miR-3944 | NM_0013201 | NRXN1 | 1 |
| hsa-miR-3944 | NM_0013201 | NRXN1 | 1 |
| hsa-miR-642b | NM_0013201 | NRXN1 | 1 |
| hsa-miR-550b | NM_0013201 | NRXN1 | 1 |
| hsa-miR-548a | NM_0013201 | NRXN1 | 1 |
| hsa-miR-548a | NM_0013201 | NRXN1 | 1 |
| hsa-miR-4424 | NM_0013201 | NRXN1 | 1 |
| hsa-miR-4425 | NM_0013201 | NRXN1 | 1 |
| hsa-miR-4428 | NM_0013201 | NRXN1 | 1 |
| hsa-miR-4429 | NM_0013201 | NRXN1 | 1 |
| hsa-miR-4430 | NM_0013201 | NRXN1 | 1 |
| hsa-miR-548a | NM_0013201 | NRXN1 | 1 |
| hsa-miR-4435 | NM_0013201 | NRXN1 | 1 |
| hsa-miR-548a | NM_0013201 | NRXN1 | 1 |
| hsa-miR-548a | NM_0013201 | NRXN1 | 1 |
| hsa-miR-4458 | NM_0013201 | NRXN1 | 1 |
| hsa-miR-4469 | NM_0013201 | NRXN1 | 1 |
| hsa-miR-3689 | NM_0013201 | NRXN1 | 1 |
| hsa-miR-4487 | NM_0013201 | NRXN1 | 1 |
| hsa-miR-4489 | NM_0013201 | NRXN1 | 1 |
| hsa-miR-4491 | NM_0013201 | NRXN1 | 1 |







|                                |   |
|--------------------------------|---|
| hsa-miR-6886 NM_0013201 NRXN1  | 1 |
| hsa-miR-6887 NM_0013201 NRXN1  | 1 |
| hsa-miR-6887 NM_0013201 NRXN1  | 1 |
| hsa-miR-6888 NM_0013201 NRXN1  | 1 |
| hsa-miR-6890 NM_0013201 NRXN1  | 1 |
| hsa-miR-6893 NM_0013201 NRXN1  | 1 |
| hsa-miR-6894 NM_0013201 NRXN1  | 1 |
| hsa-miR-6895 NM_0013201 NRXN1  | 1 |
| hsa-miR-7107 NM_0013201 NRXN1  | 1 |
| hsa-miR-7107 NM_0013201 NRXN1  | 1 |
| hsa-miR-7108 NM_0013201 NRXN1  | 1 |
| hsa-miR-7109 NM_0013201 NRXN1  | 1 |
| hsa-miR-7110 NM_0013201 NRXN1  | 1 |
| hsa-miR-7111 NM_0013201 NRXN1  | 1 |
| hsa-miR-7111 NM_0013201 NRXN1  | 1 |
| hsa-miR-7111 NM_0013201 NRXN1  | 1 |
| hsa-miR-7113 NM_0013201 NRXN1  | 1 |
| hsa-miR-7153 NM_0013201 NRXN1  | 1 |
| hsa-miR-7154 NM_0013201 NRXN1  | 1 |
| hsa-miR-7158 NM_0013201 NRXN1  | 1 |
| hsa-miR-7843 NM_0013201 NRXN1  | 1 |
| hsa-miR-4433 NM_0013201 NRXN1  | 1 |
| hsa-miR-7851 NM_0013201 NRXN1  | 1 |
| hsa-miR-7852 NM_0013201 NRXN1  | 1 |
| hsa-miR-7854 NM_0013201 NRXN1  | 1 |
| hsa-miR-8055 NM_0013201 NRXN1  | 1 |
| hsa-miR-8057 NM_0013201 NRXN1  | 1 |
| hsa-miR-8063 NM_0013201 NRXN1  | 1 |
| hsa-miR-8082 NM_0013201 NRXN1  | 1 |
| hsa-miR-8085 NM_0013201 NRXN1  | 1 |
| hsa-miR-8085 NM_0013201 NRXN1  | 1 |
| hsa-miR-9851 NM_0013201 NRXN1  | 1 |
| hsa-miR-1211 NM_0013201 NRXN1  | 1 |
| hsa-miR-1211 NM_0013201 NRXN1  | 1 |
| hsa-miR-1212 NM_0013201 NRXN1  | 1 |
| hsa-miR-1212 NM_0013201 NRXN1  | 1 |
| hsa-let-7b-5p NM_0013300 NRXN1 | 1 |
| hsa-let-7c-3p NM_0013300 NRXN1 | 1 |
| hsa-miR-25-3j NM_0013300 NRXN1 | 1 |
| hsa-miR-92a- NM_0013300 NRXN1  | 1 |
| hsa-miR-139- NM_0013300 NRXN1  | 1 |
| hsa-miR-203a NM_0013300 NRXN1  | 1 |
| hsa-miR-212- NM_0013300 NRXN1  | 1 |
| hsa-miR-214- NM_0013300 NRXN1  | 1 |
| hsa-miR-133a NM_0013300 NRXN1  | 1 |
| hsa-miR-138- NM_0013300 NRXN1  | 1 |
| hsa-miR-134- NM_0013300 NRXN1  | 1 |
| hsa-miR-136- NM_0013300 NRXN1  | 1 |
| hsa-miR-382- NM_0013300 NRXN1  | 1 |
| hsa-miR-133b NM_0013300 NRXN1  | 1 |
| hsa-miR-483- NM_0013300 NRXN1  | 1 |
| hsa-miR-487a NM_0013300 NRXN1  | 1 |
| hsa-miR-488- NM_0013300 NRXN1  | 1 |
| hsa-miR-491- NM_0013300 NRXN1  | 1 |
| hsa-miR-517- NM_0013300 NRXN1  | 1 |
| hsa-miR-521 NM_0013300 NRXN1   | 1 |
| hsa-miR-518e NM_0013300 NRXN1  | 1 |
| hsa-miR-518e NM_0013300 NRXN1  | 1 |
| hsa-miR-518a NM_0013300 NRXN1  | 1 |
| hsa-miR-506- NM_0013300 NRXN1  | 1 |
| hsa-miR-510- NM_0013300 NRXN1  | 1 |
| hsa-miR-487b NM_0013300 NRXN1  | 1 |
| hsa-miR-584- NM_0013300 NRXN1  | 1 |
| hsa-miR-624- NM_0013300 NRXN1  | 1 |
| hsa-miR-629- NM_0013300 NRXN1  | 1 |
| hsa-miR-758- NM_0013300 NRXN1  | 1 |
| hsa-miR-758- NM_0013300 NRXN1  | 1 |
| hsa-miR-1283 NM_0013300 NRXN1  | 1 |
| hsa-miR-922 NM_0013300 NRXN1   | 1 |
| hsa-miR-1250 NM_0013300 NRXN1  | 1 |
| hsa-miR-103b NM_0013300 NRXN1  | 1 |
| hsa-miR-3162 NM_0013300 NRXN1  | 1 |
| hsa-miR-3185 NM_0013300 NRXN1  | 1 |
| hsa-miR-3202 NM_0013300 NRXN1  | 1 |
| hsa-miR-3606 NM_0013300 NRXN1  | 1 |
| hsa-miR-3667 NM_0013300 NRXN1  | 1 |
| hsa-miR-3691 NM_0013300 NRXN1  | 1 |
| hsa-miR-3913 NM_0013300 NRXN1  | 1 |
| hsa-miR-3915 NM_0013300 NRXN1  | 1 |
| hsa-miR-4435 NM_0013300 NRXN1  | 1 |
| hsa-miR-4455 NM_0013300 NRXN1  | 1 |
| hsa-miR-4652 NM_0013300 NRXN1  | 1 |
| hsa-miR-4672 NM_0013300 NRXN1  | 1 |
| hsa-miR-4725 NM_0013300 NRXN1  | 1 |
| hsa-miR-4743 NM_0013300 NRXN1  | 1 |
| hsa-miR-4751 NM_0013300 NRXN1  | 1 |
| hsa-miR-4755 NM_0013300 NRXN1  | 1 |
| hsa-miR-4781 NM_0013300 NRXN1  | 1 |
| hsa-miR-4794 NM_0013300 NRXN1  | 1 |
| hsa-miR-4796 NM_0013300 NRXN1  | 1 |
| hsa-miR-5005 NM_0013300 NRXN1  | 1 |
| hsa-miR-5584 NM_0013300 NRXN1  | 1 |
| hsa-miR-1295 NM_0013300 NRXN1  | 1 |
| hsa-miR-4666 NM_0013300 NRXN1  | 1 |

|                                 |   |
|---------------------------------|---|
| hsa-miR-6072 NM_0013300 NRXN1   | 1 |
| hsa-miR-6512 NM_0013300 NRXN1   | 1 |
| hsa-miR-6513 NM_0013300 NRXN1   | 1 |
| hsa-miR-892c NM_0013300 NRXN1   | 1 |
| hsa-miR-674C NM_0013300 NRXN1   | 1 |
| hsa-miR-6767 NM_0013300 NRXN1   | 1 |
| hsa-miR-6788 NM_0013300 NRXN1   | 1 |
| hsa-miR-679C NM_0013300 NRXN1   | 1 |
| hsa-miR-6822 NM_0013300 NRXN1   | 1 |
| hsa-miR-683S NM_0013300 NRXN1   | 1 |
| hsa-miR-6852 NM_0013300 NRXN1   | 1 |
| hsa-miR-6873 NM_0013300 NRXN1   | 1 |
| hsa-miR-7155 NM_0013300 NRXN1   | 1 |
| hsa-miR-7851 NM_0013300 NRXN1   | 1 |
| hsa-miR-7854 NM_0013300 NRXN1   | 1 |
| hsa-miR-806C NM_0013300 NRXN1   | 1 |
| hsa-let-7b-5p NM_0013300 NRXN1  | 1 |
| hsa-let-7c-3p NM_0013300 NRXN1  | 1 |
| hsa-miR-92a-: NM_0013300 NRXN1  | 1 |
| hsa-miR-139-: NM_0013300 NRXN1  | 1 |
| hsa-miR-203a NM_0013300 NRXN1   | 1 |
| hsa-miR-212-: NM_0013300 NRXN1  | 1 |
| hsa-miR-214-: NM_0013300 NRXN1  | 1 |
| hsa-miR-133a NM_0013300 NRXN1   | 1 |
| hsa-miR-138-: NM_0013300 NRXN1  | 1 |
| hsa-miR-134-: NM_0013300 NRXN1  | 1 |
| hsa-miR-382-: NM_0013300 NRXN1  | 1 |
| hsa-miR-133b NM_0013300 NRXN1   | 1 |
| hsa-miR-487a NM_0013300 NRXN1   | 1 |
| hsa-miR-488-: NM_0013300 NRXN1  | 1 |
| hsa-miR-491-: NM_0013300 NRXN1  | 1 |
| hsa-miR-517-: NM_0013300 NRXN1  | 1 |
| hsa-miR-521 NM_0013300 NRXN1    | 1 |
| hsa-miR-518e NM_0013300 NRXN1   | 1 |
| hsa-miR-518a NM_0013300 NRXN1   | 1 |
| hsa-miR-487b NM_0013300 NRXN1   | 1 |
| hsa-miR-584-: NM_0013300 NRXN1  | 1 |
| hsa-miR-624-: NM_0013300 NRXN1  | 1 |
| hsa-miR-629-: NM_0013300 NRXN1  | 1 |
| hsa-miR-644a NM_0013300 NRXN1   | 1 |
| hsa-miR-758-: NM_0013300 NRXN1  | 1 |
| hsa-miR-758-: NM_0013300 NRXN1  | 1 |
| hsa-miR-550a NM_0013300 NRXN1   | 1 |
| hsa-miR-1301 NM_0013300 NRXN1   | 1 |
| hsa-miR-1283 NM_0013300 NRXN1   | 1 |
| hsa-miR-922 NM_0013300 NRXN1    | 1 |
| hsa-miR-125C NM_0013300 NRXN1   | 1 |
| hsa-miR-103b NM_0013300 NRXN1   | 1 |
| hsa-miR-3162 NM_0013300 NRXN1   | 1 |
| hsa-miR-318S NM_0013300 NRXN1   | 1 |
| hsa-miR-320C NM_0013300 NRXN1   | 1 |
| hsa-miR-360E NM_0013300 NRXN1   | 1 |
| hsa-miR-3667 NM_0013300 NRXN1   | 1 |
| hsa-miR-3691 NM_0013300 NRXN1   | 1 |
| hsa-miR-3913 NM_0013300 NRXN1   | 1 |
| hsa-miR-3915 NM_0013300 NRXN1   | 1 |
| hsa-miR-4424 NM_0013300 NRXN1   | 1 |
| hsa-miR-4435 NM_0013300 NRXN1   | 1 |
| hsa-miR-4455 NM_0013300 NRXN1   | 1 |
| hsa-miR-449C NM_0013300 NRXN1   | 1 |
| hsa-miR-449S NM_0013300 NRXN1   | 1 |
| hsa-miR-4652 NM_0013300 NRXN1   | 1 |
| hsa-miR-4672 NM_0013300 NRXN1   | 1 |
| hsa-miR-4725 NM_0013300 NRXN1   | 1 |
| hsa-miR-4743 NM_0013300 NRXN1   | 1 |
| hsa-miR-4751 NM_0013300 NRXN1   | 1 |
| hsa-miR-4755 NM_0013300 NRXN1   | 1 |
| hsa-miR-4781 NM_0013300 NRXN1   | 1 |
| hsa-miR-4796 NM_0013300 NRXN1   | 1 |
| hsa-miR-500S NM_0013300 NRXN1   | 1 |
| hsa-miR-5584 NM_0013300 NRXN1   | 1 |
| hsa-miR-1295 NM_0013300 NRXN1   | 1 |
| hsa-miR-4666 NM_0013300 NRXN1   | 1 |
| hsa-miR-6072 NM_0013300 NRXN1   | 1 |
| hsa-miR-6512 NM_0013300 NRXN1   | 1 |
| hsa-miR-6513 NM_0013300 NRXN1   | 1 |
| hsa-miR-892c NM_0013300 NRXN1   | 1 |
| hsa-miR-674C NM_0013300 NRXN1   | 1 |
| hsa-miR-6767 NM_0013300 NRXN1   | 1 |
| hsa-miR-6788 NM_0013300 NRXN1   | 1 |
| hsa-miR-679C NM_0013300 NRXN1   | 1 |
| hsa-miR-683S NM_0013300 NRXN1   | 1 |
| hsa-miR-6852 NM_0013300 NRXN1   | 1 |
| hsa-miR-6873 NM_0013300 NRXN1   | 1 |
| hsa-miR-7155 NM_0013300 NRXN1   | 1 |
| hsa-miR-7851 NM_0013300 NRXN1   | 1 |
| hsa-miR-7854 NM_0013300 NRXN1   | 1 |
| hsa-miR-806C NM_0013300 NRXN1   | 1 |
| hsa-let-7a-2-3 NM_0013300 NRXN1 | 1 |
| hsa-miR-16-1-: NM_0013300 NRXN1 | 1 |
| hsa-miR-17-5j NM_0013300 NRXN1  | 1 |
| hsa-miR-22-3j NM_0013300 NRXN1  | 1 |
| hsa-miR-101-: NM_0013300 NRXN1  | 1 |
| hsa-miR-192-: NM_0013300 NRXN1  | 1 |

|              |            |       |   |
|--------------|------------|-------|---|
| hsa-miR-199a | NM_0013300 | NRXN1 | 1 |
| hsa-miR-129- | NM_0013300 | NRXN1 | 1 |
| hsa-miR-139- | NM_0013300 | NRXN1 | 1 |
| hsa-miR-187- | NM_0013300 | NRXN1 | 1 |
| hsa-miR-199b | NM_0013300 | NRXN1 | 1 |
| hsa-miR-212- | NM_0013300 | NRXN1 | 1 |
| hsa-miR-212- | NM_0013300 | NRXN1 | 1 |
| hsa-miR-216a | NM_0013300 | NRXN1 | 1 |
| hsa-miR-216a | NM_0013300 | NRXN1 | 1 |
| hsa-miR-218- | NM_0013300 | NRXN1 | 1 |
| hsa-miR-200b | NM_0013300 | NRXN1 | 1 |
| hsa-miR-128- | NM_0013300 | NRXN1 | 1 |
| hsa-miR-132- | NM_0013300 | NRXN1 | 1 |
| hsa-miR-140- | NM_0013300 | NRXN1 | 1 |
| hsa-miR-127- | NM_0013300 | NRXN1 | 1 |
| hsa-miR-127- | NM_0013300 | NRXN1 | 1 |
| hsa-miR-188- | NM_0013300 | NRXN1 | 1 |
| hsa-miR-190a | NM_0013300 | NRXN1 | 1 |
| hsa-miR-195- | NM_0013300 | NRXN1 | 1 |
| hsa-miR-219a | NM_0013300 | NRXN1 | 1 |
| hsa-miR-299- | NM_0013300 | NRXN1 | 1 |
| hsa-miR-365a | NM_0013300 | NRXN1 | 1 |
| hsa-miR-371a | NM_0013300 | NRXN1 | 1 |
| hsa-miR-371a | NM_0013300 | NRXN1 | 1 |
| hsa-miR-433- | NM_0013300 | NRXN1 | 1 |
| hsa-miR-483- | NM_0013300 | NRXN1 | 1 |
| hsa-miR-193b | NM_0013300 | NRXN1 | 1 |
| hsa-miR-515- | NM_0013300 | NRXN1 | 1 |
| hsa-miR-519e | NM_0013300 | NRXN1 | 1 |
| hsa-miR-519c | NM_0013300 | NRXN1 | 1 |
| hsa-miR-520a | NM_0013300 | NRXN1 | 1 |
| hsa-miR-526b | NM_0013300 | NRXN1 | 1 |
| hsa-miR-519b | NM_0013300 | NRXN1 | 1 |
| hsa-miR-525- | NM_0013300 | NRXN1 | 1 |
| hsa-miR-523- | NM_0013300 | NRXN1 | 1 |
| hsa-miR-518f | NM_0013300 | NRXN1 | 1 |
| hsa-miR-524- | NM_0013300 | NRXN1 | 1 |
| hsa-miR-519d | NM_0013300 | NRXN1 | 1 |
| hsa-miR-521  | NM_0013300 | NRXN1 | 1 |
| hsa-miR-520g | NM_0013300 | NRXN1 | 1 |
| hsa-miR-520g | NM_0013300 | NRXN1 | 1 |
| hsa-miR-518e | NM_0013300 | NRXN1 | 1 |
| hsa-miR-518e | NM_0013300 | NRXN1 | 1 |
| hsa-miR-522- | NM_0013300 | NRXN1 | 1 |
| hsa-miR-519a | NM_0013300 | NRXN1 | 1 |
| hsa-miR-505- | NM_0013300 | NRXN1 | 1 |
| hsa-miR-507  | NM_0013300 | NRXN1 | 1 |
| hsa-miR-508- | NM_0013300 | NRXN1 | 1 |
| hsa-miR-514a | NM_0013300 | NRXN1 | 1 |
| hsa-miR-514a | NM_0013300 | NRXN1 | 1 |
| hsa-miR-532- | NM_0013300 | NRXN1 | 1 |
| hsa-miR-92b- | NM_0013300 | NRXN1 | 1 |
| hsa-miR-581  | NM_0013300 | NRXN1 | 1 |
| hsa-miR-550a | NM_0013300 | NRXN1 | 1 |
| hsa-miR-598- | NM_0013300 | NRXN1 | 1 |
| hsa-miR-610  | NM_0013300 | NRXN1 | 1 |
| hsa-miR-618  | NM_0013300 | NRXN1 | 1 |
| hsa-miR-642a | NM_0013300 | NRXN1 | 1 |
| hsa-miR-642a | NM_0013300 | NRXN1 | 1 |
| hsa-miR-646  | NM_0013300 | NRXN1 | 1 |
| hsa-miR-542- | NM_0013300 | NRXN1 | 1 |
| hsa-miR-1224 | NM_0013300 | NRXN1 | 1 |
| hsa-miR-1298 | NM_0013300 | NRXN1 | 1 |
| hsa-miR-1298 | NM_0013300 | NRXN1 | 1 |
| hsa-miR-765  | NM_0013300 | NRXN1 | 1 |
| hsa-miR-765  | NM_0013300 | NRXN1 | 1 |
| hsa-miR-541- | NM_0013300 | NRXN1 | 1 |
| hsa-miR-708- | NM_0013300 | NRXN1 | 1 |
| hsa-miR-877- | NM_0013300 | NRXN1 | 1 |
| hsa-miR-1181 | NM_0013300 | NRXN1 | 1 |
| hsa-miR-1229 | NM_0013300 | NRXN1 | 1 |
| hsa-miR-1236 | NM_0013300 | NRXN1 | 1 |
| hsa-miR-1207 | NM_0013300 | NRXN1 | 1 |
| hsa-miR-1285 | NM_0013300 | NRXN1 | 1 |
| hsa-miR-1287 | NM_0013300 | NRXN1 | 1 |
| hsa-miR-1285 | NM_0013300 | NRXN1 | 1 |
| hsa-miR-1291 | NM_0013300 | NRXN1 | 1 |
| hsa-miR-1245 | NM_0013300 | NRXN1 | 1 |
| hsa-miR-1261 | NM_0013300 | NRXN1 | 1 |
| hsa-miR-1288 | NM_0013300 | NRXN1 | 1 |
| hsa-miR-1288 | NM_0013300 | NRXN1 | 1 |
| hsa-miR-664a | NM_0013300 | NRXN1 | 1 |
| hsa-miR-191C | NM_0013300 | NRXN1 | 1 |
| hsa-miR-2114 | NM_0013300 | NRXN1 | 1 |
| hsa-miR-3126 | NM_0013300 | NRXN1 | 1 |
| hsa-miR-3127 | NM_0013300 | NRXN1 | 1 |
| hsa-miR-3127 | NM_0013300 | NRXN1 | 1 |
| hsa-miR-378b | NM_0013300 | NRXN1 | 1 |
| hsa-miR-544b | NM_0013300 | NRXN1 | 1 |
| hsa-miR-3144 | NM_0013300 | NRXN1 | 1 |
| hsa-miR-3151 | NM_0013300 | NRXN1 | 1 |
| hsa-miR-316C | NM_0013300 | NRXN1 | 1 |
| hsa-miR-3173 | NM_0013300 | NRXN1 | 1 |
| hsa-miR-3194 | NM_0013300 | NRXN1 | 1 |

|                               |   |
|-------------------------------|---|
| hsa-miR-3198 NM_0013300 NRXN1 | 1 |
| hsa-miR-4295 NM_0013300 NRXN1 | 1 |
| hsa-miR-4298 NM_0013300 NRXN1 | 1 |
| hsa-miR-4257 NM_0013300 NRXN1 | 1 |
| hsa-miR-4253 NM_0013300 NRXN1 | 1 |
| hsa-miR-4251 NM_0013300 NRXN1 | 1 |
| hsa-miR-4266 NM_0013300 NRXN1 | 1 |
| hsa-miR-4267 NM_0013300 NRXN1 | 1 |
| hsa-miR-4287 NM_0013300 NRXN1 | 1 |
| hsa-miR-3612 NM_0013300 NRXN1 | 1 |
| hsa-miR-3622 NM_0013300 NRXN1 | 1 |
| hsa-miR-3675 NM_0013300 NRXN1 | 1 |
| hsa-miR-3682 NM_0013300 NRXN1 | 1 |
| hsa-miR-3688 NM_0013300 NRXN1 | 1 |
| hsa-miR-3685 NM_0013300 NRXN1 | 1 |
| hsa-miR-3925 NM_0013300 NRXN1 | 1 |
| hsa-miR-3926 NM_0013300 NRXN1 | 1 |
| hsa-miR-642b NM_0013300 NRXN1 | 1 |
| hsa-miR-642b NM_0013300 NRXN1 | 1 |
| hsa-miR-642c NM_0013300 NRXN1 | 1 |
| hsa-miR-550b NM_0013300 NRXN1 | 1 |
| hsa-miR-442c NM_0013300 NRXN1 | 1 |
| hsa-miR-4428 NM_0013300 NRXN1 | 1 |
| hsa-miR-4433 NM_0013300 NRXN1 | 1 |
| hsa-miR-4448 NM_0013300 NRXN1 | 1 |
| hsa-miR-445c NM_0013300 NRXN1 | 1 |
| hsa-miR-445c NM_0013300 NRXN1 | 1 |
| hsa-miR-446c NM_0013300 NRXN1 | 1 |
| hsa-miR-3685 NM_0013300 NRXN1 | 1 |
| hsa-miR-3685 NM_0013300 NRXN1 | 1 |
| hsa-miR-3685 NM_0013300 NRXN1 | 1 |
| hsa-miR-4491 NM_0013300 NRXN1 | 1 |
| hsa-miR-4494 NM_0013300 NRXN1 | 1 |
| hsa-miR-4495 NM_0013300 NRXN1 | 1 |
| hsa-miR-4512 NM_0013300 NRXN1 | 1 |
| hsa-miR-4526 NM_0013300 NRXN1 | 1 |
| hsa-miR-4534 NM_0013300 NRXN1 | 1 |
| hsa-miR-548a NM_0013300 NRXN1 | 1 |
| hsa-miR-3972 NM_0013300 NRXN1 | 1 |
| hsa-miR-3975 NM_0013300 NRXN1 | 1 |
| hsa-miR-4635 NM_0013300 NRXN1 | 1 |
| hsa-miR-4656 NM_0013300 NRXN1 | 1 |
| hsa-miR-4667 NM_0013300 NRXN1 | 1 |
| hsa-miR-4667 NM_0013300 NRXN1 | 1 |
| hsa-miR-4677 NM_0013300 NRXN1 | 1 |
| hsa-miR-4683 NM_0013300 NRXN1 | 1 |
| hsa-miR-4694 NM_0013300 NRXN1 | 1 |
| hsa-miR-4703 NM_0013300 NRXN1 | 1 |
| hsa-miR-471c NM_0013300 NRXN1 | 1 |
| hsa-miR-3525 NM_0013300 NRXN1 | 1 |
| hsa-miR-4727 NM_0013300 NRXN1 | 1 |
| hsa-miR-4738 NM_0013300 NRXN1 | 1 |
| hsa-miR-4742 NM_0013300 NRXN1 | 1 |
| hsa-miR-4742 NM_0013300 NRXN1 | 1 |
| hsa-miR-4768 NM_0013300 NRXN1 | 1 |
| hsa-miR-4768 NM_0013300 NRXN1 | 1 |
| hsa-miR-4765 NM_0013300 NRXN1 | 1 |
| hsa-miR-4776 NM_0013300 NRXN1 | 1 |
| hsa-miR-4788 NM_0013300 NRXN1 | 1 |
| hsa-miR-4793 NM_0013300 NRXN1 | 1 |
| hsa-miR-4794 NM_0013300 NRXN1 | 1 |
| hsa-miR-4804 NM_0013300 NRXN1 | 1 |
| hsa-miR-5002 NM_0013300 NRXN1 | 1 |
| hsa-miR-5004 NM_0013300 NRXN1 | 1 |
| hsa-miR-5004 NM_0013300 NRXN1 | 1 |
| hsa-miR-5005 NM_0013300 NRXN1 | 1 |
| hsa-miR-5187 NM_0013300 NRXN1 | 1 |
| hsa-miR-5188 NM_0013300 NRXN1 | 1 |
| hsa-miR-5185 NM_0013300 NRXN1 | 1 |
| hsa-miR-5185 NM_0013300 NRXN1 | 1 |
| hsa-miR-5194 NM_0013300 NRXN1 | 1 |
| hsa-miR-5197 NM_0013300 NRXN1 | 1 |
| hsa-miR-4524 NM_0013300 NRXN1 | 1 |
| hsa-miR-510c NM_0013300 NRXN1 | 1 |
| hsa-miR-558c NM_0013300 NRXN1 | 1 |
| hsa-miR-558c NM_0013300 NRXN1 | 1 |
| hsa-miR-5581 NM_0013300 NRXN1 | 1 |
| hsa-miR-1295 NM_0013300 NRXN1 | 1 |
| hsa-miR-1295 NM_0013300 NRXN1 | 1 |
| hsa-miR-5694 NM_0013300 NRXN1 | 1 |
| hsa-miR-5705 NM_0013300 NRXN1 | 1 |
| hsa-miR-5735 NM_0013300 NRXN1 | 1 |
| hsa-miR-1195 NM_0013300 NRXN1 | 1 |
| hsa-miR-6075 NM_0013300 NRXN1 | 1 |
| hsa-miR-6086 NM_0013300 NRXN1 | 1 |
| hsa-miR-6124 NM_0013300 NRXN1 | 1 |
| hsa-miR-6503 NM_0013300 NRXN1 | 1 |
| hsa-miR-6503 NM_0013300 NRXN1 | 1 |
| hsa-miR-6504 NM_0013300 NRXN1 | 1 |
| hsa-miR-6507 NM_0013300 NRXN1 | 1 |
| hsa-miR-673c NM_0013300 NRXN1 | 1 |
| hsa-miR-6731 NM_0013300 NRXN1 | 1 |
| hsa-miR-6733 NM_0013300 NRXN1 | 1 |
| hsa-miR-6734 NM_0013300 NRXN1 | 1 |

|                |            |       |   |
|----------------|------------|-------|---|
| hsa-miR-6739   | NM_0013300 | NRXN1 | 1 |
| hsa-miR-6740   | NM_0013300 | NRXN1 | 1 |
| hsa-miR-6751   | NM_0013300 | NRXN1 | 1 |
| hsa-miR-6751   | NM_0013300 | NRXN1 | 1 |
| hsa-miR-6752   | NM_0013300 | NRXN1 | 1 |
| hsa-miR-6764   | NM_0013300 | NRXN1 | 1 |
| hsa-miR-6764   | NM_0013300 | NRXN1 | 1 |
| hsa-miR-6766   | NM_0013300 | NRXN1 | 1 |
| hsa-miR-6767   | NM_0013300 | NRXN1 | 1 |
| hsa-miR-6768   | NM_0013300 | NRXN1 | 1 |
| hsa-miR-6778   | NM_0013300 | NRXN1 | 1 |
| hsa-miR-6798   | NM_0013300 | NRXN1 | 1 |
| hsa-miR-6807   | NM_0013300 | NRXN1 | 1 |
| hsa-miR-6808   | NM_0013300 | NRXN1 | 1 |
| hsa-miR-6818   | NM_0013300 | NRXN1 | 1 |
| hsa-miR-6827   | NM_0013300 | NRXN1 | 1 |
| hsa-miR-6838   | NM_0013300 | NRXN1 | 1 |
| hsa-miR-6842   | NM_0013300 | NRXN1 | 1 |
| hsa-miR-6856   | NM_0013300 | NRXN1 | 1 |
| hsa-miR-6856   | NM_0013300 | NRXN1 | 1 |
| hsa-miR-6860   | NM_0013300 | NRXN1 | 1 |
| hsa-miR-6860   | NM_0013300 | NRXN1 | 1 |
| hsa-miR-6864   | NM_0013300 | NRXN1 | 1 |
| hsa-miR-6865   | NM_0013300 | NRXN1 | 1 |
| hsa-miR-6870   | NM_0013300 | NRXN1 | 1 |
| hsa-miR-6886   | NM_0013300 | NRXN1 | 1 |
| hsa-miR-6887   | NM_0013300 | NRXN1 | 1 |
| hsa-miR-6891   | NM_0013300 | NRXN1 | 1 |
| hsa-miR-6891   | NM_0013300 | NRXN1 | 1 |
| hsa-miR-6892   | NM_0013300 | NRXN1 | 1 |
| hsa-miR-7106   | NM_0013300 | NRXN1 | 1 |
| hsa-miR-7160   | NM_0013300 | NRXN1 | 1 |
| hsa-miR-7515   | NM_0013300 | NRXN1 | 1 |
| hsa-miR-4433   | NM_0013300 | NRXN1 | 1 |
| hsa-miR-7847   | NM_0013300 | NRXN1 | 1 |
| hsa-miR-7848   | NM_0013300 | NRXN1 | 1 |
| hsa-miR-7854   | NM_0013300 | NRXN1 | 1 |
| hsa-miR-7856   | NM_0013300 | NRXN1 | 1 |
| hsa-miR-8064   | NM_0013300 | NRXN1 | 1 |
| hsa-miR-8085   | NM_0013300 | NRXN1 | 1 |
| hsa-miR-9983   | NM_0013300 | NRXN1 | 1 |
| hsa-miR-1118   | NM_0013300 | NRXN1 | 1 |
| hsa-miR-1140   | NM_0013300 | NRXN1 | 1 |
| hsa-miR-1211   | NM_0013300 | NRXN1 | 1 |
| hsa-miR-1211   | NM_0013300 | NRXN1 | 1 |
| hsa-miR-1212   | NM_0013300 | NRXN1 | 1 |
| hsa-let-7a-2-3 | NM_0013300 | NRXN1 | 1 |
| hsa-miR-16-1   | NM_0013300 | NRXN1 | 1 |
| hsa-miR-17-5j  | NM_0013300 | NRXN1 | 1 |
| hsa-miR-22-3j  | NM_0013300 | NRXN1 | 1 |
| hsa-miR-92a-   | NM_0013300 | NRXN1 | 1 |
| hsa-miR-101-   | NM_0013300 | NRXN1 | 1 |
| hsa-miR-29b-   | NM_0013300 | NRXN1 | 1 |
| hsa-miR-199a   | NM_0013300 | NRXN1 | 1 |
| hsa-miR-129-   | NM_0013300 | NRXN1 | 1 |
| hsa-miR-139-   | NM_0013300 | NRXN1 | 1 |
| hsa-miR-182-   | NM_0013300 | NRXN1 | 1 |
| hsa-miR-187-   | NM_0013300 | NRXN1 | 1 |
| hsa-miR-199b   | NM_0013300 | NRXN1 | 1 |
| hsa-miR-203a   | NM_0013300 | NRXN1 | 1 |
| hsa-miR-212-   | NM_0013300 | NRXN1 | 1 |
| hsa-miR-212-   | NM_0013300 | NRXN1 | 1 |
| hsa-miR-216a   | NM_0013300 | NRXN1 | 1 |
| hsa-miR-216a   | NM_0013300 | NRXN1 | 1 |
| hsa-miR-218-   | NM_0013300 | NRXN1 | 1 |
| hsa-miR-200b   | NM_0013300 | NRXN1 | 1 |
| hsa-miR-128-   | NM_0013300 | NRXN1 | 1 |
| hsa-miR-132-   | NM_0013300 | NRXN1 | 1 |
| hsa-miR-140-   | NM_0013300 | NRXN1 | 1 |
| hsa-miR-127-   | NM_0013300 | NRXN1 | 1 |
| hsa-miR-127-   | NM_0013300 | NRXN1 | 1 |
| hsa-miR-188-   | NM_0013300 | NRXN1 | 1 |
| hsa-miR-190a   | NM_0013300 | NRXN1 | 1 |
| hsa-miR-195-   | NM_0013300 | NRXN1 | 1 |
| hsa-miR-219a   | NM_0013300 | NRXN1 | 1 |
| hsa-miR-299-   | NM_0013300 | NRXN1 | 1 |
| hsa-miR-365a   | NM_0013300 | NRXN1 | 1 |
| hsa-miR-371a   | NM_0013300 | NRXN1 | 1 |
| hsa-miR-371a   | NM_0013300 | NRXN1 | 1 |
| hsa-miR-323a   | NM_0013300 | NRXN1 | 1 |
| hsa-miR-450a   | NM_0013300 | NRXN1 | 1 |
| hsa-miR-433-   | NM_0013300 | NRXN1 | 1 |
| hsa-miR-193b   | NM_0013300 | NRXN1 | 1 |
| hsa-miR-515-   | NM_0013300 | NRXN1 | 1 |
| hsa-miR-519e   | NM_0013300 | NRXN1 | 1 |
| hsa-miR-519c   | NM_0013300 | NRXN1 | 1 |
| hsa-miR-520a   | NM_0013300 | NRXN1 | 1 |
| hsa-miR-526b   | NM_0013300 | NRXN1 | 1 |
| hsa-miR-519b   | NM_0013300 | NRXN1 | 1 |
| hsa-miR-525-   | NM_0013300 | NRXN1 | 1 |
| hsa-miR-523-   | NM_0013300 | NRXN1 | 1 |
| hsa-miR-518f   | NM_0013300 | NRXN1 | 1 |
| hsa-miR-524-   | NM_0013300 | NRXN1 | 1 |
| hsa-miR-519d   | NM_0013300 | NRXN1 | 1 |

|              |            |       |   |
|--------------|------------|-------|---|
| hsa-miR-521  | NM_0013300 | NRXN1 | 1 |
| hsa-miR-520g | NM_0013300 | NRXN1 | 1 |
| hsa-miR-520g | NM_0013300 | NRXN1 | 1 |
| hsa-miR-518e | NM_0013300 | NRXN1 | 1 |
| hsa-miR-518e | NM_0013300 | NRXN1 | 1 |
| hsa-miR-522- | NM_0013300 | NRXN1 | 1 |
| hsa-miR-519a | NM_0013300 | NRXN1 | 1 |
| hsa-miR-505- | NM_0013300 | NRXN1 | 1 |
| hsa-miR-507  | NM_0013300 | NRXN1 | 1 |
| hsa-miR-508- | NM_0013300 | NRXN1 | 1 |
| hsa-miR-514a | NM_0013300 | NRXN1 | 1 |
| hsa-miR-514a | NM_0013300 | NRXN1 | 1 |
| hsa-miR-532- | NM_0013300 | NRXN1 | 1 |
| hsa-miR-92b- | NM_0013300 | NRXN1 | 1 |
| hsa-miR-581  | NM_0013300 | NRXN1 | 1 |
| hsa-miR-550a | NM_0013300 | NRXN1 | 1 |
| hsa-miR-598- | NM_0013300 | NRXN1 | 1 |
| hsa-miR-610  | NM_0013300 | NRXN1 | 1 |
| hsa-miR-617  | NM_0013300 | NRXN1 | 1 |
| hsa-miR-618  | NM_0013300 | NRXN1 | 1 |
| hsa-miR-642a | NM_0013300 | NRXN1 | 1 |
| hsa-miR-642a | NM_0013300 | NRXN1 | 1 |
| hsa-miR-646  | NM_0013300 | NRXN1 | 1 |
| hsa-miR-542- | NM_0013300 | NRXN1 | 1 |
| hsa-miR-1224 | NM_0013300 | NRXN1 | 1 |
| hsa-miR-1224 | NM_0013300 | NRXN1 | 1 |
| hsa-miR-1224 | NM_0013300 | NRXN1 | 1 |
| hsa-miR-1298 | NM_0013300 | NRXN1 | 1 |
| hsa-miR-1298 | NM_0013300 | NRXN1 | 1 |
| hsa-miR-765  | NM_0013300 | NRXN1 | 1 |
| hsa-miR-300  | NM_0013300 | NRXN1 | 1 |
| hsa-miR-541- | NM_0013300 | NRXN1 | 1 |
| hsa-miR-708- | NM_0013300 | NRXN1 | 1 |
| hsa-miR-877- | NM_0013300 | NRXN1 | 1 |
| hsa-miR-760  | NM_0013300 | NRXN1 | 1 |
| hsa-miR-1181 | NM_0013300 | NRXN1 | 1 |
| hsa-miR-1225 | NM_0013300 | NRXN1 | 1 |
| hsa-miR-1236 | NM_0013300 | NRXN1 | 1 |
| hsa-miR-1285 | NM_0013300 | NRXN1 | 1 |
| hsa-miR-1287 | NM_0013300 | NRXN1 | 1 |
| hsa-miR-1289 | NM_0013300 | NRXN1 | 1 |
| hsa-miR-1291 | NM_0013300 | NRXN1 | 1 |
| hsa-miR-1261 | NM_0013300 | NRXN1 | 1 |
| hsa-miR-1288 | NM_0013300 | NRXN1 | 1 |
| hsa-miR-1288 | NM_0013300 | NRXN1 | 1 |
| hsa-miR-664a | NM_0013300 | NRXN1 | 1 |
| hsa-miR-191C | NM_0013300 | NRXN1 | 1 |
| hsa-miR-2114 | NM_0013300 | NRXN1 | 1 |
| hsa-miR-3126 | NM_0013300 | NRXN1 | 1 |
| hsa-miR-3127 | NM_0013300 | NRXN1 | 1 |
| hsa-miR-3127 | NM_0013300 | NRXN1 | 1 |
| hsa-miR-378b | NM_0013300 | NRXN1 | 1 |
| hsa-miR-544b | NM_0013300 | NRXN1 | 1 |
| hsa-miR-3144 | NM_0013300 | NRXN1 | 1 |
| hsa-miR-3151 | NM_0013300 | NRXN1 | 1 |
| hsa-miR-316C | NM_0013300 | NRXN1 | 1 |
| hsa-miR-3173 | NM_0013300 | NRXN1 | 1 |
| hsa-miR-3194 | NM_0013300 | NRXN1 | 1 |
| hsa-miR-3198 | NM_0013300 | NRXN1 | 1 |
| hsa-miR-4299 | NM_0013300 | NRXN1 | 1 |
| hsa-miR-4298 | NM_0013300 | NRXN1 | 1 |
| hsa-miR-4253 | NM_0013300 | NRXN1 | 1 |
| hsa-miR-4251 | NM_0013300 | NRXN1 | 1 |
| hsa-miR-4266 | NM_0013300 | NRXN1 | 1 |
| hsa-miR-4267 | NM_0013300 | NRXN1 | 1 |
| hsa-miR-4287 | NM_0013300 | NRXN1 | 1 |
| hsa-miR-3612 | NM_0013300 | NRXN1 | 1 |
| hsa-miR-3622 | NM_0013300 | NRXN1 | 1 |
| hsa-miR-367C | NM_0013300 | NRXN1 | 1 |
| hsa-miR-3675 | NM_0013300 | NRXN1 | 1 |
| hsa-miR-3682 | NM_0013300 | NRXN1 | 1 |
| hsa-miR-3688 | NM_0013300 | NRXN1 | 1 |
| hsa-miR-3685 | NM_0013300 | NRXN1 | 1 |
| hsa-miR-3925 | NM_0013300 | NRXN1 | 1 |
| hsa-miR-3926 | NM_0013300 | NRXN1 | 1 |
| hsa-miR-642b | NM_0013300 | NRXN1 | 1 |
| hsa-miR-642b | NM_0013300 | NRXN1 | 1 |
| hsa-miR-642b | NM_0013300 | NRXN1 | 1 |
| hsa-miR-550b | NM_0013300 | NRXN1 | 1 |
| hsa-miR-442C | NM_0013300 | NRXN1 | 1 |
| hsa-miR-4428 | NM_0013300 | NRXN1 | 1 |
| hsa-miR-4433 | NM_0013300 | NRXN1 | 1 |
| hsa-miR-4448 | NM_0013300 | NRXN1 | 1 |
| hsa-miR-445C | NM_0013300 | NRXN1 | 1 |
| hsa-miR-445C | NM_0013300 | NRXN1 | 1 |
| hsa-miR-446C | NM_0013300 | NRXN1 | 1 |
| hsa-miR-3685 | NM_0013300 | NRXN1 | 1 |
| hsa-miR-3685 | NM_0013300 | NRXN1 | 1 |
| hsa-miR-3685 | NM_0013300 | NRXN1 | 1 |
| hsa-miR-4494 | NM_0013300 | NRXN1 | 1 |
| hsa-miR-4495 | NM_0013300 | NRXN1 | 1 |
| hsa-miR-4512 | NM_0013300 | NRXN1 | 1 |
| hsa-miR-4526 | NM_0013300 | NRXN1 | 1 |
| hsa-miR-4534 | NM_0013300 | NRXN1 | 1 |



|                                 |   |
|---------------------------------|---|
| hsa-miR-7856 NM_0013300 NRXN1   | 1 |
| hsa-miR-8064 NM_0013300 NRXN1   | 1 |
| hsa-miR-8085 NM_0013300 NRXN1   | 1 |
| hsa-miR-9983 NM_0013300 NRXN1   | 1 |
| hsa-miR-1118 NM_0013300 NRXN1   | 1 |
| hsa-miR-1140 NM_0013300 NRXN1   | 1 |
| hsa-miR-1211 NM_0013300 NRXN1   | 1 |
| hsa-miR-1212 NM_0013300 NRXN1   | 1 |
| hsa-let-7b-5p NM_0013300 NRXN1  | 1 |
| hsa-let-7c-3p NM_0013300 NRXN1  | 1 |
| hsa-miR-25-3j NM_0013300 NRXN1  | 1 |
| hsa-miR-92a- NM_0013300 NRXN1   | 1 |
| hsa-miR-139- NM_0013300 NRXN1   | 1 |
| hsa-miR-203a NM_0013300 NRXN1   | 1 |
| hsa-miR-212- NM_0013300 NRXN1   | 1 |
| hsa-miR-214- NM_0013300 NRXN1   | 1 |
| hsa-miR-133a NM_0013300 NRXN1   | 1 |
| hsa-miR-138- NM_0013300 NRXN1   | 1 |
| hsa-miR-134- NM_0013300 NRXN1   | 1 |
| hsa-miR-136- NM_0013300 NRXN1   | 1 |
| hsa-miR-382- NM_0013300 NRXN1   | 1 |
| hsa-miR-133b NM_0013300 NRXN1   | 1 |
| hsa-miR-483- NM_0013300 NRXN1   | 1 |
| hsa-miR-487a NM_0013300 NRXN1   | 1 |
| hsa-miR-488- NM_0013300 NRXN1   | 1 |
| hsa-miR-491- NM_0013300 NRXN1   | 1 |
| hsa-miR-517- NM_0013300 NRXN1   | 1 |
| hsa-miR-521 NM_0013300 NRXN1    | 1 |
| hsa-miR-518e NM_0013300 NRXN1   | 1 |
| hsa-miR-518e NM_0013300 NRXN1   | 1 |
| hsa-miR-518a NM_0013300 NRXN1   | 1 |
| hsa-miR-506- NM_0013300 NRXN1   | 1 |
| hsa-miR-510- NM_0013300 NRXN1   | 1 |
| hsa-miR-487b NM_0013300 NRXN1   | 1 |
| hsa-miR-584- NM_0013300 NRXN1   | 1 |
| hsa-miR-624- NM_0013300 NRXN1   | 1 |
| hsa-miR-629- NM_0013300 NRXN1   | 1 |
| hsa-miR-758- NM_0013300 NRXN1   | 1 |
| hsa-miR-758- NM_0013300 NRXN1   | 1 |
| hsa-miR-1283 NM_0013300 NRXN1   | 1 |
| hsa-miR-922 NM_0013300 NRXN1    | 1 |
| hsa-miR-125C NM_0013300 NRXN1   | 1 |
| hsa-miR-103b NM_0013300 NRXN1   | 1 |
| hsa-miR-3162 NM_0013300 NRXN1   | 1 |
| hsa-miR-3189 NM_0013300 NRXN1   | 1 |
| hsa-miR-3202 NM_0013300 NRXN1   | 1 |
| hsa-miR-3606 NM_0013300 NRXN1   | 1 |
| hsa-miR-3667 NM_0013300 NRXN1   | 1 |
| hsa-miR-3691 NM_0013300 NRXN1   | 1 |
| hsa-miR-3913 NM_0013300 NRXN1   | 1 |
| hsa-miR-3915 NM_0013300 NRXN1   | 1 |
| hsa-miR-4435 NM_0013300 NRXN1   | 1 |
| hsa-miR-4455 NM_0013300 NRXN1   | 1 |
| hsa-miR-4652 NM_0013300 NRXN1   | 1 |
| hsa-miR-4672 NM_0013300 NRXN1   | 1 |
| hsa-miR-4725 NM_0013300 NRXN1   | 1 |
| hsa-miR-4743 NM_0013300 NRXN1   | 1 |
| hsa-miR-4751 NM_0013300 NRXN1   | 1 |
| hsa-miR-4755 NM_0013300 NRXN1   | 1 |
| hsa-miR-4781 NM_0013300 NRXN1   | 1 |
| hsa-miR-4794 NM_0013300 NRXN1   | 1 |
| hsa-miR-4796 NM_0013300 NRXN1   | 1 |
| hsa-miR-5009 NM_0013300 NRXN1   | 1 |
| hsa-miR-5584 NM_0013300 NRXN1   | 1 |
| hsa-miR-1295 NM_0013300 NRXN1   | 1 |
| hsa-miR-4666 NM_0013300 NRXN1   | 1 |
| hsa-miR-6072 NM_0013300 NRXN1   | 1 |
| hsa-miR-6512 NM_0013300 NRXN1   | 1 |
| hsa-miR-6513 NM_0013300 NRXN1   | 1 |
| hsa-miR-892c NM_0013300 NRXN1   | 1 |
| hsa-miR-6740 NM_0013300 NRXN1   | 1 |
| hsa-miR-6767 NM_0013300 NRXN1   | 1 |
| hsa-miR-6788 NM_0013300 NRXN1   | 1 |
| hsa-miR-6790 NM_0013300 NRXN1   | 1 |
| hsa-miR-6822 NM_0013300 NRXN1   | 1 |
| hsa-miR-6839 NM_0013300 NRXN1   | 1 |
| hsa-miR-6852 NM_0013300 NRXN1   | 1 |
| hsa-miR-6873 NM_0013300 NRXN1   | 1 |
| hsa-miR-7155 NM_0013300 NRXN1   | 1 |
| hsa-miR-7851 NM_0013300 NRXN1   | 1 |
| hsa-miR-7854 NM_0013300 NRXN1   | 1 |
| hsa-miR-8060 NM_0013300 NRXN1   | 1 |
| hsa-let-7a-2-3 NM_0013300 NRXN1 | 1 |
| hsa-miR-16-1- NM_0013300 NRXN1  | 1 |
| hsa-miR-17-5j NM_0013300 NRXN1  | 1 |
| hsa-miR-22-3j NM_0013300 NRXN1  | 1 |
| hsa-miR-29b- NM_0013300 NRXN1   | 1 |
| hsa-miR-199a NM_0013300 NRXN1   | 1 |
| hsa-miR-129- NM_0013300 NRXN1   | 1 |
| hsa-miR-187- NM_0013300 NRXN1   | 1 |
| hsa-miR-199b NM_0013300 NRXN1   | 1 |
| hsa-miR-203a NM_0013300 NRXN1   | 1 |
| hsa-miR-212- NM_0013300 NRXN1   | 1 |
| hsa-miR-212- NM_0013300 NRXN1   | 1 |



|              |            |       |   |
|--------------|------------|-------|---|
| hsa-miR-216a | NM_0013300 | NRXN1 | 1 |
| hsa-miR-218- | NM_0013300 | NRXN1 | 1 |
| hsa-miR-200b | NM_0013300 | NRXN1 | 1 |
| hsa-miR-132- | NM_0013300 | NRXN1 | 1 |
| hsa-miR-140- | NM_0013300 | NRXN1 | 1 |
| hsa-miR-127- | NM_0013300 | NRXN1 | 1 |
| hsa-miR-127- | NM_0013300 | NRXN1 | 1 |
| hsa-miR-188- | NM_0013300 | NRXN1 | 1 |
| hsa-miR-190a | NM_0013300 | NRXN1 | 1 |
| hsa-miR-195- | NM_0013300 | NRXN1 | 1 |
| hsa-miR-219a | NM_0013300 | NRXN1 | 1 |
| hsa-miR-299- | NM_0013300 | NRXN1 | 1 |
| hsa-miR-365a | NM_0013300 | NRXN1 | 1 |
| hsa-miR-371a | NM_0013300 | NRXN1 | 1 |
| hsa-miR-433- | NM_0013300 | NRXN1 | 1 |
| hsa-miR-193b | NM_0013300 | NRXN1 | 1 |
| hsa-miR-519e | NM_0013300 | NRXN1 | 1 |
| hsa-miR-519c | NM_0013300 | NRXN1 | 1 |
| hsa-miR-520a | NM_0013300 | NRXN1 | 1 |
| hsa-miR-526b | NM_0013300 | NRXN1 | 1 |
| hsa-miR-519b | NM_0013300 | NRXN1 | 1 |
| hsa-miR-525- | NM_0013300 | NRXN1 | 1 |
| hsa-miR-523- | NM_0013300 | NRXN1 | 1 |
| hsa-miR-518f | NM_0013300 | NRXN1 | 1 |
| hsa-miR-524- | NM_0013300 | NRXN1 | 1 |
| hsa-miR-519d | NM_0013300 | NRXN1 | 1 |
| hsa-miR-521  | NM_0013300 | NRXN1 | 1 |
| hsa-miR-520g | NM_0013300 | NRXN1 | 1 |
| hsa-miR-520g | NM_0013300 | NRXN1 | 1 |
| hsa-miR-518e | NM_0013300 | NRXN1 | 1 |
| hsa-miR-518e | NM_0013300 | NRXN1 | 1 |
| hsa-miR-522- | NM_0013300 | NRXN1 | 1 |
| hsa-miR-519a | NM_0013300 | NRXN1 | 1 |
| hsa-miR-505- | NM_0013300 | NRXN1 | 1 |
| hsa-miR-507  | NM_0013300 | NRXN1 | 1 |
| hsa-miR-508- | NM_0013300 | NRXN1 | 1 |
| hsa-miR-509- | NM_0013300 | NRXN1 | 1 |
| hsa-miR-514a | NM_0013300 | NRXN1 | 1 |
| hsa-miR-514a | NM_0013300 | NRXN1 | 1 |
| hsa-miR-92b- | NM_0013300 | NRXN1 | 1 |
| hsa-miR-581  | NM_0013300 | NRXN1 | 1 |
| hsa-miR-550a | NM_0013300 | NRXN1 | 1 |
| hsa-miR-598- | NM_0013300 | NRXN1 | 1 |
| hsa-miR-610  | NM_0013300 | NRXN1 | 1 |
| hsa-miR-618  | NM_0013300 | NRXN1 | 1 |
| hsa-miR-642a | NM_0013300 | NRXN1 | 1 |
| hsa-miR-642a | NM_0013300 | NRXN1 | 1 |
| hsa-miR-646  | NM_0013300 | NRXN1 | 1 |
| hsa-miR-542- | NM_0013300 | NRXN1 | 1 |
| hsa-miR-1301 | NM_0013300 | NRXN1 | 1 |
| hsa-miR-1298 | NM_0013300 | NRXN1 | 1 |
| hsa-miR-765  | NM_0013300 | NRXN1 | 1 |
| hsa-miR-300  | NM_0013300 | NRXN1 | 1 |
| hsa-miR-541- | NM_0013300 | NRXN1 | 1 |
| hsa-miR-708- | NM_0013300 | NRXN1 | 1 |
| hsa-miR-1181 | NM_0013300 | NRXN1 | 1 |
| hsa-miR-1229 | NM_0013300 | NRXN1 | 1 |
| hsa-miR-1236 | NM_0013300 | NRXN1 | 1 |
| hsa-miR-1207 | NM_0013300 | NRXN1 | 1 |
| hsa-miR-1285 | NM_0013300 | NRXN1 | 1 |
| hsa-miR-1285 | NM_0013300 | NRXN1 | 1 |
| hsa-miR-1291 | NM_0013300 | NRXN1 | 1 |
| hsa-miR-1294 | NM_0013300 | NRXN1 | 1 |
| hsa-miR-1245 | NM_0013300 | NRXN1 | 1 |
| hsa-miR-1261 | NM_0013300 | NRXN1 | 1 |
| hsa-miR-1288 | NM_0013300 | NRXN1 | 1 |
| hsa-miR-1288 | NM_0013300 | NRXN1 | 1 |
| hsa-miR-664a | NM_0013300 | NRXN1 | 1 |
| hsa-miR-191c | NM_0013300 | NRXN1 | 1 |
| hsa-miR-2114 | NM_0013300 | NRXN1 | 1 |
| hsa-miR-3126 | NM_0013300 | NRXN1 | 1 |
| hsa-miR-3127 | NM_0013300 | NRXN1 | 1 |
| hsa-miR-3127 | NM_0013300 | NRXN1 | 1 |
| hsa-miR-378b | NM_0013300 | NRXN1 | 1 |
| hsa-miR-544b | NM_0013300 | NRXN1 | 1 |
| hsa-miR-3144 | NM_0013300 | NRXN1 | 1 |
| hsa-miR-316c | NM_0013300 | NRXN1 | 1 |
| hsa-miR-3173 | NM_0013300 | NRXN1 | 1 |
| hsa-miR-3194 | NM_0013300 | NRXN1 | 1 |
| hsa-miR-3198 | NM_0013300 | NRXN1 | 1 |
| hsa-miR-4295 | NM_0013300 | NRXN1 | 1 |
| hsa-miR-4298 | NM_0013300 | NRXN1 | 1 |
| hsa-miR-4253 | NM_0013300 | NRXN1 | 1 |
| hsa-miR-4251 | NM_0013300 | NRXN1 | 1 |
| hsa-miR-4266 | NM_0013300 | NRXN1 | 1 |
| hsa-miR-4287 | NM_0013300 | NRXN1 | 1 |
| hsa-miR-3622 | NM_0013300 | NRXN1 | 1 |
| hsa-miR-367c | NM_0013300 | NRXN1 | 1 |
| hsa-miR-3675 | NM_0013300 | NRXN1 | 1 |
| hsa-miR-3682 | NM_0013300 | NRXN1 | 1 |
| hsa-miR-3688 | NM_0013300 | NRXN1 | 1 |
| hsa-miR-3685 | NM_0013300 | NRXN1 | 1 |
| hsa-miR-3925 | NM_0013300 | NRXN1 | 1 |
| hsa-miR-3926 | NM_0013300 | NRXN1 | 1 |

|                                  |   |
|----------------------------------|---|
| hsa-miR-642b NM_0013300 NRXN1    | 1 |
| hsa-miR-642b NM_0013300 NRXN1    | 1 |
| hsa-miR-550b NM_0013300 NRXN1    | 1 |
| hsa-miR-442C NM_0013300 NRXN1    | 1 |
| hsa-miR-4428 NM_0013300 NRXN1    | 1 |
| hsa-miR-4433 NM_0013300 NRXN1    | 1 |
| hsa-miR-4448 NM_0013300 NRXN1    | 1 |
| hsa-miR-445C NM_0013300 NRXN1    | 1 |
| hsa-miR-445C NM_0013300 NRXN1    | 1 |
| hsa-miR-446C NM_0013300 NRXN1    | 1 |
| hsa-miR-3689 NM_0013300 NRXN1    | 1 |
| hsa-miR-3689 NM_0013300 NRXN1    | 1 |
| hsa-miR-3689 NM_0013300 NRXN1    | 1 |
| hsa-miR-4489 NM_0013300 NRXN1    | 1 |
| hsa-miR-4494 NM_0013300 NRXN1    | 1 |
| hsa-miR-4495 NM_0013300 NRXN1    | 1 |
| hsa-miR-4512 NM_0013300 NRXN1    | 1 |
| hsa-miR-4526 NM_0013300 NRXN1    | 1 |
| hsa-miR-548a NM_0013300 NRXN1    | 1 |
| hsa-miR-3972 NM_0013300 NRXN1    | 1 |
| hsa-miR-4635 NM_0013300 NRXN1    | 1 |
| hsa-miR-4656 NM_0013300 NRXN1    | 1 |
| hsa-miR-4667 NM_0013300 NRXN1    | 1 |
| hsa-miR-4694 NM_0013300 NRXN1    | 1 |
| hsa-miR-4703 NM_0013300 NRXN1    | 1 |
| hsa-miR-471C NM_0013300 NRXN1    | 1 |
| hsa-miR-3529 NM_0013300 NRXN1    | 1 |
| hsa-miR-4742 NM_0013300 NRXN1    | 1 |
| hsa-miR-4768 NM_0013300 NRXN1    | 1 |
| hsa-miR-4768 NM_0013300 NRXN1    | 1 |
| hsa-miR-4769 NM_0013300 NRXN1    | 1 |
| hsa-miR-4776 NM_0013300 NRXN1    | 1 |
| hsa-miR-4788 NM_0013300 NRXN1    | 1 |
| hsa-miR-4793 NM_0013300 NRXN1    | 1 |
| hsa-miR-4794 NM_0013300 NRXN1    | 1 |
| hsa-miR-480C NM_0013300 NRXN1    | 1 |
| hsa-miR-4804 NM_0013300 NRXN1    | 1 |
| hsa-miR-5002 NM_0013300 NRXN1    | 1 |
| hsa-miR-5004 NM_0013300 NRXN1    | 1 |
| hsa-miR-5004 NM_0013300 NRXN1    | 1 |
| hsa-miR-5009 NM_0013300 NRXN1    | 1 |
| hsa-miR-5188 NM_0013300 NRXN1    | 1 |
| hsa-miR-5189 NM_0013300 NRXN1    | 1 |
| hsa-miR-5194 NM_0013300 NRXN1    | 1 |
| hsa-miR-5197 NM_0013300 NRXN1    | 1 |
| hsa-miR-4524 NM_0013300 NRXN1    | 1 |
| hsa-miR-558C NM_0013300 NRXN1    | 1 |
| hsa-miR-5581 NM_0013300 NRXN1    | 1 |
| hsa-miR-1295 NM_0013300 NRXN1    | 1 |
| hsa-miR-1295 NM_0013300 NRXN1    | 1 |
| hsa-miR-5694 NM_0013300 NRXN1    | 1 |
| hsa-miR-6086 NM_0013300 NRXN1    | 1 |
| hsa-miR-6503 NM_0013300 NRXN1    | 1 |
| hsa-miR-6507 NM_0013300 NRXN1    | 1 |
| hsa-miR-673C NM_0013300 NRXN1    | 1 |
| hsa-miR-6731 NM_0013300 NRXN1    | 1 |
| hsa-miR-6733 NM_0013300 NRXN1    | 1 |
| hsa-miR-6739 NM_0013300 NRXN1    | 1 |
| hsa-miR-674C NM_0013300 NRXN1    | 1 |
| hsa-miR-6751 NM_0013300 NRXN1    | 1 |
| hsa-miR-6751 NM_0013300 NRXN1    | 1 |
| hsa-miR-6752 NM_0013300 NRXN1    | 1 |
| hsa-miR-6764 NM_0013300 NRXN1    | 1 |
| hsa-miR-6764 NM_0013300 NRXN1    | 1 |
| hsa-miR-6766 NM_0013300 NRXN1    | 1 |
| hsa-miR-6767 NM_0013300 NRXN1    | 1 |
| hsa-miR-6778 NM_0013300 NRXN1    | 1 |
| hsa-miR-6798 NM_0013300 NRXN1    | 1 |
| hsa-miR-6808 NM_0013300 NRXN1    | 1 |
| hsa-miR-6838 NM_0013300 NRXN1    | 1 |
| hsa-miR-6856 NM_0013300 NRXN1    | 1 |
| hsa-miR-6859 NM_0013300 NRXN1    | 1 |
| hsa-miR-686C NM_0013300 NRXN1    | 1 |
| hsa-miR-686C NM_0013300 NRXN1    | 1 |
| hsa-miR-6864 NM_0013300 NRXN1    | 1 |
| hsa-miR-687C NM_0013300 NRXN1    | 1 |
| hsa-miR-6891 NM_0013300 NRXN1    | 1 |
| hsa-miR-7106 NM_0013300 NRXN1    | 1 |
| hsa-miR-716C NM_0013300 NRXN1    | 1 |
| hsa-miR-7515 NM_0013300 NRXN1    | 1 |
| hsa-miR-4433 NM_0013300 NRXN1    | 1 |
| hsa-miR-7847 NM_0013300 NRXN1    | 1 |
| hsa-miR-7848 NM_0013300 NRXN1    | 1 |
| hsa-miR-7854 NM_0013300 NRXN1    | 1 |
| hsa-miR-8064 NM_0013300 NRXN1    | 1 |
| hsa-miR-9983 NM_0013300 NRXN1    | 1 |
| hsa-miR-1118 NM_0013300 NRXN1    | 1 |
| hsa-miR-114C NM_0013300 NRXN1    | 1 |
| hsa-miR-1211 NM_0013300 NRXN1    | 1 |
| hsa-miR-1212 NM_0013300 NRXN1    | 1 |
| hsa-let-7b-5p NM_0013300 NRXN1   | 1 |
| hsa-let-7c-3p NM_0013300 NRXN1   | 1 |
| hsa-let-7f-1-3j NM_0013300 NRXN1 | 1 |
| hsa-miR-16-5j NM_0013300 NRXN1   | 1 |

|              |            |       |   |
|--------------|------------|-------|---|
| hsa-miR-92a- | NM_0013300 | NRXN1 | 1 |
| hsa-miR-103a | NM_0013300 | NRXN1 | 1 |
| hsa-miR-198  | NM_0013300 | NRXN1 | 1 |
| hsa-miR-139- | NM_0013300 | NRXN1 | 1 |
| hsa-miR-182- | NM_0013300 | NRXN1 | 1 |
| hsa-miR-203a | NM_0013300 | NRXN1 | 1 |
| hsa-miR-205- | NM_0013300 | NRXN1 | 1 |
| hsa-miR-212- | NM_0013300 | NRXN1 | 1 |
| hsa-miR-1-3p | NM_0013300 | NRXN1 | 1 |
| hsa-miR-15b- | NM_0013300 | NRXN1 | 1 |
| hsa-miR-124- | NM_0013300 | NRXN1 | 1 |
| hsa-miR-133a | NM_0013300 | NRXN1 | 1 |
| hsa-miR-134- | NM_0013300 | NRXN1 | 1 |
| hsa-miR-101- | NM_0013300 | NRXN1 | 1 |
| hsa-miR-302b | NM_0013300 | NRXN1 | 1 |
| hsa-miR-370- | NM_0013300 | NRXN1 | 1 |
| hsa-miR-382- | NM_0013300 | NRXN1 | 1 |
| hsa-miR-151a | NM_0013300 | NRXN1 | 1 |
| hsa-miR-133b | NM_0013300 | NRXN1 | 1 |
| hsa-miR-450a | NM_0013300 | NRXN1 | 1 |
| hsa-miR-487a | NM_0013300 | NRXN1 | 1 |
| hsa-miR-491- | NM_0013300 | NRXN1 | 1 |
| hsa-miR-517- | NM_0013300 | NRXN1 | 1 |
| hsa-miR-509- | NM_0013300 | NRXN1 | 1 |
| hsa-miR-487b | NM_0013300 | NRXN1 | 1 |
| hsa-miR-584- | NM_0013300 | NRXN1 | 1 |
| hsa-miR-548b | NM_0013300 | NRXN1 | 1 |
| hsa-miR-605- | NM_0013300 | NRXN1 | 1 |
| hsa-miR-614  | NM_0013300 | NRXN1 | 1 |
| hsa-miR-629- | NM_0013300 | NRXN1 | 1 |
| hsa-miR-644a | NM_0013300 | NRXN1 | 1 |
| hsa-miR-548d | NM_0013300 | NRXN1 | 1 |
| hsa-miR-657  | NM_0013300 | NRXN1 | 1 |
| hsa-miR-542- | NM_0013300 | NRXN1 | 1 |
| hsa-miR-758- | NM_0013300 | NRXN1 | 1 |
| hsa-miR-1301 | NM_0013300 | NRXN1 | 1 |
| hsa-miR-1283 | NM_0013300 | NRXN1 | 1 |
| hsa-miR-761  | NM_0013300 | NRXN1 | 1 |
| hsa-miR-887- | NM_0013300 | NRXN1 | 1 |
| hsa-miR-922  | NM_0013300 | NRXN1 | 1 |
| hsa-miR-922  | NM_0013300 | NRXN1 | 1 |
| hsa-miR-944  | NM_0013300 | NRXN1 | 1 |
| hsa-miR-1208 | NM_0013300 | NRXN1 | 1 |
| hsa-miR-1248 | NM_0013300 | NRXN1 | 1 |
| hsa-miR-125c | NM_0013300 | NRXN1 | 1 |
| hsa-miR-1251 | NM_0013300 | NRXN1 | 1 |
| hsa-miR-548n | NM_0013300 | NRXN1 | 1 |
| hsa-miR-103b | NM_0013300 | NRXN1 | 1 |
| hsa-miR-2681 | NM_0013300 | NRXN1 | 1 |
| hsa-miR-312g | NM_0013300 | NRXN1 | 1 |
| hsa-miR-319c | NM_0013300 | NRXN1 | 1 |
| hsa-miR-430g | NM_0013300 | NRXN1 | 1 |
| hsa-miR-4257 | NM_0013300 | NRXN1 | 1 |
| hsa-miR-4278 | NM_0013300 | NRXN1 | 1 |
| hsa-miR-3612 | NM_0013300 | NRXN1 | 1 |
| hsa-miR-3691 | NM_0013300 | NRXN1 | 1 |
| hsa-miR-3913 | NM_0013300 | NRXN1 | 1 |
| hsa-miR-3926 | NM_0013300 | NRXN1 | 1 |
| hsa-miR-548a | NM_0013300 | NRXN1 | 1 |
| hsa-miR-443c | NM_0013300 | NRXN1 | 1 |
| hsa-miR-548a | NM_0013300 | NRXN1 | 1 |
| hsa-miR-4435 | NM_0013300 | NRXN1 | 1 |
| hsa-miR-4436 | NM_0013300 | NRXN1 | 1 |
| hsa-miR-548a | NM_0013300 | NRXN1 | 1 |
| hsa-miR-548a | NM_0013300 | NRXN1 | 1 |
| hsa-miR-4487 | NM_0013300 | NRXN1 | 1 |
| hsa-miR-452c | NM_0013300 | NRXN1 | 1 |
| hsa-miR-4527 | NM_0013300 | NRXN1 | 1 |
| hsa-miR-219b | NM_0013300 | NRXN1 | 1 |
| hsa-miR-4672 | NM_0013300 | NRXN1 | 1 |
| hsa-miR-469g | NM_0013300 | NRXN1 | 1 |
| hsa-miR-470c | NM_0013300 | NRXN1 | 1 |
| hsa-miR-4718 | NM_0013300 | NRXN1 | 1 |
| hsa-miR-4725 | NM_0013300 | NRXN1 | 1 |
| hsa-miR-4743 | NM_0013300 | NRXN1 | 1 |
| hsa-miR-4751 | NM_0013300 | NRXN1 | 1 |
| hsa-miR-4755 | NM_0013300 | NRXN1 | 1 |
| hsa-miR-4768 | NM_0013300 | NRXN1 | 1 |
| hsa-miR-4796 | NM_0013300 | NRXN1 | 1 |
| hsa-miR-4802 | NM_0013300 | NRXN1 | 1 |
| hsa-miR-500c | NM_0013300 | NRXN1 | 1 |
| hsa-miR-500g | NM_0013300 | NRXN1 | 1 |
| hsa-miR-5197 | NM_0013300 | NRXN1 | 1 |
| hsa-miR-4666 | NM_0013300 | NRXN1 | 1 |
| hsa-miR-6072 | NM_0013300 | NRXN1 | 1 |
| hsa-miR-548a | NM_0013300 | NRXN1 | 1 |
| hsa-miR-548a | NM_0013300 | NRXN1 | 1 |
| hsa-miR-6507 | NM_0013300 | NRXN1 | 1 |
| hsa-miR-6513 | NM_0013300 | NRXN1 | 1 |
| hsa-miR-6722 | NM_0013300 | NRXN1 | 1 |
| hsa-miR-892c | NM_0013300 | NRXN1 | 1 |
| hsa-miR-6755 | NM_0013300 | NRXN1 | 1 |
| hsa-miR-6767 | NM_0013300 | NRXN1 | 1 |
| hsa-miR-6776 | NM_0013300 | NRXN1 | 1 |

|                                |   |
|--------------------------------|---|
| hsa-miR-6788 NM_0013300 NRXN1  | 1 |
| hsa-miR-6798 NM_0013300 NRXN1  | 1 |
| hsa-miR-6800 NM_0013300 NRXN1  | 1 |
| hsa-miR-6805 NM_0013300 NRXN1  | 1 |
| hsa-miR-6818 NM_0013300 NRXN1  | 1 |
| hsa-miR-6833 NM_0013300 NRXN1  | 1 |
| hsa-miR-6835 NM_0013300 NRXN1  | 1 |
| hsa-miR-6864 NM_0013300 NRXN1  | 1 |
| hsa-miR-6873 NM_0013300 NRXN1  | 1 |
| hsa-miR-6882 NM_0013300 NRXN1  | 1 |
| hsa-miR-7106 NM_0013300 NRXN1  | 1 |
| hsa-miR-7851 NM_0013300 NRXN1  | 1 |
| hsa-miR-8060 NM_0013300 NRXN1  | 1 |
| hsa-miR-8063 NM_0013300 NRXN1  | 1 |
| hsa-miR-1212 NM_0013300 NRXN1  | 1 |
| hsa-let-7b-5p NM_0013300 NRXN1 | 1 |
| hsa-let-7c-3p NM_0013300 NRXN1 | 1 |
| hsa-miR-16-5j NM_0013300 NRXN1 | 1 |
| hsa-miR-92a-: NM_0013300 NRXN1 | 1 |
| hsa-miR-101-: NM_0013300 NRXN1 | 1 |
| hsa-miR-198 NM_0013300 NRXN1   | 1 |
| hsa-miR-139-: NM_0013300 NRXN1 | 1 |
| hsa-miR-182-: NM_0013300 NRXN1 | 1 |
| hsa-miR-203a NM_0013300 NRXN1  | 1 |
| hsa-miR-212-: NM_0013300 NRXN1 | 1 |
| hsa-miR-214-: NM_0013300 NRXN1 | 1 |
| hsa-miR-1-3p NM_0013300 NRXN1  | 1 |
| hsa-miR-15b-: NM_0013300 NRXN1 | 1 |
| hsa-miR-124-: NM_0013300 NRXN1 | 1 |
| hsa-miR-133a NM_0013300 NRXN1  | 1 |
| hsa-miR-134-: NM_0013300 NRXN1 | 1 |
| hsa-miR-150-: NM_0013300 NRXN1 | 1 |
| hsa-miR-302b NM_0013300 NRXN1  | 1 |
| hsa-miR-370-: NM_0013300 NRXN1 | 1 |
| hsa-miR-382-: NM_0013300 NRXN1 | 1 |
| hsa-miR-151a NM_0013300 NRXN1  | 1 |
| hsa-miR-133b NM_0013300 NRXN1  | 1 |
| hsa-miR-450a NM_0013300 NRXN1  | 1 |
| hsa-miR-487a NM_0013300 NRXN1  | 1 |
| hsa-miR-491-: NM_0013300 NRXN1 | 1 |
| hsa-miR-517-: NM_0013300 NRXN1 | 1 |
| hsa-miR-509-: NM_0013300 NRXN1 | 1 |
| hsa-miR-455-: NM_0013300 NRXN1 | 1 |
| hsa-miR-487b NM_0013300 NRXN1  | 1 |
| hsa-miR-605-: NM_0013300 NRXN1 | 1 |
| hsa-miR-629-: NM_0013300 NRXN1 | 1 |
| hsa-miR-642a NM_0013300 NRXN1  | 1 |
| hsa-miR-644a NM_0013300 NRXN1  | 1 |
| hsa-miR-548d NM_0013300 NRXN1  | 1 |
| hsa-miR-657 NM_0013300 NRXN1   | 1 |
| hsa-miR-758-: NM_0013300 NRXN1 | 1 |
| hsa-miR-1283 NM_0013300 NRXN1  | 1 |
| hsa-miR-761 NM_0013300 NRXN1   | 1 |
| hsa-miR-761 NM_0013300 NRXN1   | 1 |
| hsa-miR-887-: NM_0013300 NRXN1 | 1 |
| hsa-miR-301b NM_0013300 NRXN1  | 1 |
| hsa-miR-922 NM_0013300 NRXN1   | 1 |
| hsa-miR-922 NM_0013300 NRXN1   | 1 |
| hsa-miR-944 NM_0013300 NRXN1   | 1 |
| hsa-miR-1208 NM_0013300 NRXN1  | 1 |
| hsa-miR-1248 NM_0013300 NRXN1  | 1 |
| hsa-miR-1250 NM_0013300 NRXN1  | 1 |
| hsa-miR-1251 NM_0013300 NRXN1  | 1 |
| hsa-miR-103b NM_0013300 NRXN1  | 1 |
| hsa-miR-3125 NM_0013300 NRXN1  | 1 |
| hsa-miR-3190 NM_0013300 NRXN1  | 1 |
| hsa-miR-4305 NM_0013300 NRXN1  | 1 |
| hsa-miR-4257 NM_0013300 NRXN1  | 1 |
| hsa-miR-4252 NM_0013300 NRXN1  | 1 |
| hsa-miR-4278 NM_0013300 NRXN1  | 1 |
| hsa-miR-3612 NM_0013300 NRXN1  | 1 |
| hsa-miR-3691 NM_0013300 NRXN1  | 1 |
| hsa-miR-3913 NM_0013300 NRXN1  | 1 |
| hsa-miR-374c NM_0013300 NRXN1  | 1 |
| hsa-miR-642b NM_0013300 NRXN1  | 1 |
| hsa-miR-548a NM_0013300 NRXN1  | 1 |
| hsa-miR-4430 NM_0013300 NRXN1  | 1 |
| hsa-miR-4435 NM_0013300 NRXN1  | 1 |
| hsa-miR-4436 NM_0013300 NRXN1  | 1 |
| hsa-miR-4487 NM_0013300 NRXN1  | 1 |
| hsa-miR-4520 NM_0013300 NRXN1  | 1 |
| hsa-miR-4527 NM_0013300 NRXN1  | 1 |
| hsa-miR-219b NM_0013300 NRXN1  | 1 |
| hsa-miR-4672 NM_0013300 NRXN1  | 1 |
| hsa-miR-4700 NM_0013300 NRXN1  | 1 |
| hsa-miR-4718 NM_0013300 NRXN1  | 1 |
| hsa-miR-4725 NM_0013300 NRXN1  | 1 |
| hsa-miR-4725 NM_0013300 NRXN1  | 1 |
| hsa-miR-4743 NM_0013300 NRXN1  | 1 |
| hsa-miR-4751 NM_0013300 NRXN1  | 1 |
| hsa-miR-4755 NM_0013300 NRXN1  | 1 |
| hsa-miR-4768 NM_0013300 NRXN1  | 1 |
| hsa-miR-4796 NM_0013300 NRXN1  | 1 |
| hsa-miR-4802 NM_0013300 NRXN1  | 1 |

|                                |   |
|--------------------------------|---|
| hsa-miR-4802 NM_0013300 NRXN1  | 1 |
| hsa-miR-500C NM_0013300 NRXN1  | 1 |
| hsa-miR-500S NM_0013300 NRXN1  | 1 |
| hsa-miR-5195 NM_0013300 NRXN1  | 1 |
| hsa-miR-5197 NM_0013300 NRXN1  | 1 |
| hsa-miR-5579 NM_0013300 NRXN1  | 1 |
| hsa-miR-558C NM_0013300 NRXN1  | 1 |
| hsa-miR-5691 NM_0013300 NRXN1  | 1 |
| hsa-miR-4666 NM_0013300 NRXN1  | 1 |
| hsa-miR-6072 NM_0013300 NRXN1  | 1 |
| hsa-miR-548a NM_0013300 NRXN1  | 1 |
| hsa-miR-548a NM_0013300 NRXN1  | 1 |
| hsa-miR-6507 NM_0013300 NRXN1  | 1 |
| hsa-miR-6513 NM_0013300 NRXN1  | 1 |
| hsa-miR-6511 NM_0013300 NRXN1  | 1 |
| hsa-miR-6722 NM_0013300 NRXN1  | 1 |
| hsa-miR-892c NM_0013300 NRXN1  | 1 |
| hsa-miR-6747 NM_0013300 NRXN1  | 1 |
| hsa-miR-6755 NM_0013300 NRXN1  | 1 |
| hsa-miR-6758 NM_0013300 NRXN1  | 1 |
| hsa-miR-6767 NM_0013300 NRXN1  | 1 |
| hsa-miR-6776 NM_0013300 NRXN1  | 1 |
| hsa-miR-6788 NM_0013300 NRXN1  | 1 |
| hsa-miR-6798 NM_0013300 NRXN1  | 1 |
| hsa-miR-680C NM_0013300 NRXN1  | 1 |
| hsa-miR-680S NM_0013300 NRXN1  | 1 |
| hsa-miR-6818 NM_0013300 NRXN1  | 1 |
| hsa-miR-6833 NM_0013300 NRXN1  | 1 |
| hsa-miR-683S NM_0013300 NRXN1  | 1 |
| hsa-miR-6873 NM_0013300 NRXN1  | 1 |
| hsa-miR-7106 NM_0013300 NRXN1  | 1 |
| hsa-miR-7851 NM_0013300 NRXN1  | 1 |
| hsa-miR-806C NM_0013300 NRXN1  | 1 |
| hsa-miR-8063 NM_0013300 NRXN1  | 1 |
| hsa-miR-8085 NM_0013300 NRXN1  | 1 |
| hsa-miR-3059 NM_0013300 NRXN1  | 1 |
| hsa-miR-1212 NM_0013300 NRXN1  | 1 |
| hsa-let-7b-5p NM_0011356 NRXN1 | 1 |
| hsa-let-7c-3p NM_0011356 NRXN1 | 1 |
| hsa-miR-92a- NM_0011356 NRXN1  | 1 |
| hsa-miR-139- NM_0011356 NRXN1  | 1 |
| hsa-miR-203a NM_0011356 NRXN1  | 1 |
| hsa-miR-212- NM_0011356 NRXN1  | 1 |
| hsa-miR-214- NM_0011356 NRXN1  | 1 |
| hsa-miR-222- NM_0011356 NRXN1  | 1 |
| hsa-miR-133a NM_0011356 NRXN1  | 1 |
| hsa-miR-138- NM_0011356 NRXN1  | 1 |
| hsa-miR-134- NM_0011356 NRXN1  | 1 |
| hsa-miR-136- NM_0011356 NRXN1  | 1 |
| hsa-miR-382- NM_0011356 NRXN1  | 1 |
| hsa-miR-133b NM_0011356 NRXN1  | 1 |
| hsa-miR-483- NM_0011356 NRXN1  | 1 |
| hsa-miR-487a NM_0011356 NRXN1  | 1 |
| hsa-miR-488- NM_0011356 NRXN1  | 1 |
| hsa-miR-491- NM_0011356 NRXN1  | 1 |
| hsa-miR-517- NM_0011356 NRXN1  | 1 |
| hsa-miR-521 NM_0011356 NRXN1   | 1 |
| hsa-miR-518e NM_0011356 NRXN1  | 1 |
| hsa-miR-518e NM_0011356 NRXN1  | 1 |
| hsa-miR-518a NM_0011356 NRXN1  | 1 |
| hsa-miR-506- NM_0011356 NRXN1  | 1 |
| hsa-miR-487b NM_0011356 NRXN1  | 1 |
| hsa-miR-584- NM_0011356 NRXN1  | 1 |
| hsa-miR-624- NM_0011356 NRXN1  | 1 |
| hsa-miR-629- NM_0011356 NRXN1  | 1 |
| hsa-miR-758- NM_0011356 NRXN1  | 1 |
| hsa-miR-922 NM_0011356 NRXN1   | 1 |
| hsa-miR-125C NM_0011356 NRXN1  | 1 |
| hsa-miR-103b NM_0011356 NRXN1  | 1 |
| hsa-miR-312S NM_0011356 NRXN1  | 1 |
| hsa-miR-3162 NM_0011356 NRXN1  | 1 |
| hsa-miR-318S NM_0011356 NRXN1  | 1 |
| hsa-miR-3202 NM_0011356 NRXN1  | 1 |
| hsa-miR-3606 NM_0011356 NRXN1  | 1 |
| hsa-miR-3667 NM_0011356 NRXN1  | 1 |
| hsa-miR-3691 NM_0011356 NRXN1  | 1 |
| hsa-miR-3913 NM_0011356 NRXN1  | 1 |
| hsa-miR-3915 NM_0011356 NRXN1  | 1 |
| hsa-miR-4435 NM_0011356 NRXN1  | 1 |
| hsa-miR-4455 NM_0011356 NRXN1  | 1 |
| hsa-miR-449C NM_0011356 NRXN1  | 1 |
| hsa-miR-4652 NM_0011356 NRXN1  | 1 |
| hsa-miR-4672 NM_0011356 NRXN1  | 1 |
| hsa-miR-472C NM_0011356 NRXN1  | 1 |
| hsa-miR-4725 NM_0011356 NRXN1  | 1 |
| hsa-miR-4743 NM_0011356 NRXN1  | 1 |
| hsa-miR-4751 NM_0011356 NRXN1  | 1 |
| hsa-miR-4755 NM_0011356 NRXN1  | 1 |
| hsa-miR-4781 NM_0011356 NRXN1  | 1 |
| hsa-miR-4794 NM_0011356 NRXN1  | 1 |
| hsa-miR-4796 NM_0011356 NRXN1  | 1 |
| hsa-miR-500S NM_0011356 NRXN1  | 1 |
| hsa-miR-5584 NM_0011356 NRXN1  | 1 |
| hsa-miR-1295 NM_0011356 NRXN1  | 1 |

|                                |            |
|--------------------------------|------------|
| hsa-miR-4666 NM_0011356 NRXN1  | 1          |
| hsa-miR-6076 NM_0011356 NRXN1  | 1          |
| hsa-miR-6512 NM_0011356 NRXN1  | 1          |
| hsa-miR-6513 NM_0011356 NRXN1  | 1          |
| hsa-miR-892c NM_0011356 NRXN1  | 1          |
| hsa-miR-674C NM_0011356 NRXN1  | 1          |
| hsa-miR-6767 NM_0011356 NRXN1  | 1          |
| hsa-miR-6788 NM_0011356 NRXN1  | 1          |
| hsa-miR-679C NM_0011356 NRXN1  | 1          |
| hsa-miR-6822 NM_0011356 NRXN1  | 1          |
| hsa-miR-6839 NM_0011356 NRXN1  | 1          |
| hsa-miR-6852 NM_0011356 NRXN1  | 1          |
| hsa-miR-6873 NM_0011356 NRXN1  | 1          |
| hsa-miR-7155 NM_0011356 NRXN1  | 1          |
| hsa-miR-7851 NM_0011356 NRXN1  | 1          |
| hsa-miR-7852 NM_0011356 NRXN1  | 1          |
| hsa-miR-7854 NM_0011356 NRXN1  | 1          |
| hsa-miR-806C NM_0011356 NRXN1  | 1          |
| hsa-miR-99b-: NM_0012866 POSTN | 0.96153846 |
| hsa-miR-584-: NM_0012866 POSTN | 0.96153846 |
| hsa-miR-99b-: NM_0012866 POSTN | 0.96153846 |
| hsa-miR-584-: NM_0012866 POSTN | 0.96153846 |
| hsa-miR-99b-: NM_006475 POSTN  | 0.96153846 |
| hsa-miR-584-: NM_006475 POSTN  | 0.96153846 |
| hsa-miR-99b-: NM_0013305 POSTN | 0.96153846 |
| hsa-miR-584-: NM_0013305 POSTN | 0.96153846 |
| hsa-miR-99b-: NM_0011359 POSTN | 0.96153846 |
| hsa-miR-584-: NM_0011359 POSTN | 0.96153846 |
| hsa-miR-99b-: NM_0011359 POSTN | 0.96153846 |
| hsa-miR-584-: NM_0011359 POSTN | 0.96153846 |
| hsa-miR-510-: NM_0012866 POSTN | 0.97435897 |
| hsa-miR-665 NM_0012866 POSTN   | 0.97435897 |
| hsa-miR-665 NM_0012866 POSTN   | 0.97435897 |
| hsa-miR-510-: NM_006475 POSTN  | 0.97435897 |
| hsa-miR-665 NM_006475 POSTN    | 0.97435897 |
| hsa-miR-510-: NM_0013305 POSTN | 0.97435897 |
| hsa-miR-665 NM_0013305 POSTN   | 0.97435897 |
| hsa-miR-510-: NM_0011359 POSTN | 0.97435897 |
| hsa-miR-665 NM_0011359 POSTN   | 0.97435897 |
| hsa-miR-665 NM_0011359 POSTN   | 0.97435897 |
| hsa-let-7b-5p NM_0012866 POSTN | 1          |
| hsa-miR-103a NM_0012866 POSTN  | 1          |
| hsa-miR-103a NM_0012866 POSTN  | 1          |
| hsa-miR-107 NM_0012866 POSTN   | 1          |
| hsa-miR-128-: NM_0012866 POSTN | 1          |
| hsa-miR-127-: NM_0012866 POSTN | 1          |
| hsa-miR-127-: NM_0012866 POSTN | 1          |
| hsa-miR-185-: NM_0012866 POSTN | 1          |
| hsa-miR-329-: NM_0012866 POSTN | 1          |
| hsa-miR-488-: NM_0012866 POSTN | 1          |
| hsa-miR-618 NM_0012866 POSTN   | 1          |
| hsa-miR-647 NM_0012866 POSTN   | 1          |
| hsa-miR-648 NM_0012866 POSTN   | 1          |
| hsa-miR-941 NM_0012866 POSTN   | 1          |
| hsa-miR-1233 NM_0012866 POSTN  | 1          |
| hsa-miR-3127 NM_0012866 POSTN  | 1          |
| hsa-miR-3144 NM_0012866 POSTN  | 1          |
| hsa-miR-3147 NM_0012866 POSTN  | 1          |
| hsa-miR-3155 NM_0012866 POSTN  | 1          |
| hsa-miR-3174 NM_0012866 POSTN  | 1          |
| hsa-miR-4316 NM_0012866 POSTN  | 1          |
| hsa-miR-4445 NM_0012866 POSTN  | 1          |
| hsa-miR-4453 NM_0012866 POSTN  | 1          |
| hsa-miR-4462 NM_0012866 POSTN  | 1          |
| hsa-miR-4516 NM_0012866 POSTN  | 1          |
| hsa-miR-1343 NM_0012866 POSTN  | 1          |
| hsa-miR-4701 NM_0012866 POSTN  | 1          |
| hsa-miR-4704 NM_0012866 POSTN  | 1          |
| hsa-miR-4757 NM_0012866 POSTN  | 1          |
| hsa-miR-5007 NM_0012866 POSTN  | 1          |
| hsa-miR-6131 NM_0012866 POSTN  | 1          |
| hsa-miR-6783 NM_0012866 POSTN  | 1          |
| hsa-miR-6795 NM_0012866 POSTN  | 1          |
| hsa-miR-6817 NM_0012866 POSTN  | 1          |
| hsa-miR-6825 NM_0012866 POSTN  | 1          |
| hsa-miR-6846 NM_0012866 POSTN  | 1          |
| hsa-miR-6885 NM_0012866 POSTN  | 1          |
| hsa-miR-7152 NM_0012866 POSTN  | 1          |
| hsa-miR-7155 NM_0012866 POSTN  | 1          |
| hsa-let-7b-5p NM_0012866 POSTN | 1          |
| hsa-miR-27a-: NM_0012866 POSTN | 1          |
| hsa-miR-103a NM_0012866 POSTN  | 1          |
| hsa-miR-127-: NM_0012866 POSTN | 1          |
| hsa-miR-127-: NM_0012866 POSTN | 1          |
| hsa-miR-188-: NM_0012866 POSTN | 1          |
| hsa-miR-378a NM_0012866 POSTN  | 1          |
| hsa-miR-488-: NM_0012866 POSTN | 1          |
| hsa-miR-618 NM_0012866 POSTN   | 1          |
| hsa-miR-647 NM_0012866 POSTN   | 1          |
| hsa-miR-648 NM_0012866 POSTN   | 1          |
| hsa-miR-941 NM_0012866 POSTN   | 1          |
| hsa-miR-2116 NM_0012866 POSTN  | 1          |
| hsa-miR-3127 NM_0012866 POSTN  | 1          |
| hsa-miR-3147 NM_0012866 POSTN  | 1          |

|                          |       |   |
|--------------------------|-------|---|
| hsa-miR-3944 NM_0012866  | POSTN | 1 |
| hsa-miR-4445 NM_0012866  | POSTN | 1 |
| hsa-miR-4453 NM_0012866  | POSTN | 1 |
| hsa-miR-4462 NM_0012866  | POSTN | 1 |
| hsa-miR-4516 NM_0012866  | POSTN | 1 |
| hsa-miR-1343 NM_0012866  | POSTN | 1 |
| hsa-miR-4701 NM_0012866  | POSTN | 1 |
| hsa-miR-4704 NM_0012866  | POSTN | 1 |
| hsa-miR-4733 NM_0012866  | POSTN | 1 |
| hsa-miR-4757 NM_0012866  | POSTN | 1 |
| hsa-miR-5007 NM_0012866  | POSTN | 1 |
| hsa-miR-5581 NM_0012866  | POSTN | 1 |
| hsa-miR-6131 NM_0012866  | POSTN | 1 |
| hsa-miR-6783 NM_0012866  | POSTN | 1 |
| hsa-miR-6795 NM_0012866  | POSTN | 1 |
| hsa-miR-6817 NM_0012866  | POSTN | 1 |
| hsa-miR-6825 NM_0012866  | POSTN | 1 |
| hsa-miR-6865 NM_0012866  | POSTN | 1 |
| hsa-miR-6885 NM_0012866  | POSTN | 1 |
| hsa-miR-711C NM_0012866  | POSTN | 1 |
| hsa-miR-7152 NM_0012866  | POSTN | 1 |
| hsa-miR-7159 NM_0012866  | POSTN | 1 |
| hsa-miR-1212 NM_0012866  | POSTN | 1 |
| hsa-let-7b-5p NM_006475  | POSTN | 1 |
| hsa-miR-103a NM_006475   | POSTN | 1 |
| hsa-miR-103a NM_006475   | POSTN | 1 |
| hsa-miR-107 NM_006475    | POSTN | 1 |
| hsa-miR-128-: NM_006475  | POSTN | 1 |
| hsa-miR-127-: NM_006475  | POSTN | 1 |
| hsa-miR-127-: NM_006475  | POSTN | 1 |
| hsa-miR-185-: NM_006475  | POSTN | 1 |
| hsa-miR-329-: NM_006475  | POSTN | 1 |
| hsa-miR-488-: NM_006475  | POSTN | 1 |
| hsa-miR-618 NM_006475    | POSTN | 1 |
| hsa-miR-647 NM_006475    | POSTN | 1 |
| hsa-miR-648 NM_006475    | POSTN | 1 |
| hsa-miR-941 NM_006475    | POSTN | 1 |
| hsa-miR-1233 NM_006475   | POSTN | 1 |
| hsa-miR-3127 NM_006475   | POSTN | 1 |
| hsa-miR-3144 NM_006475   | POSTN | 1 |
| hsa-miR-3147 NM_006475   | POSTN | 1 |
| hsa-miR-3155 NM_006475   | POSTN | 1 |
| hsa-miR-3174 NM_006475   | POSTN | 1 |
| hsa-miR-4316 NM_006475   | POSTN | 1 |
| hsa-miR-4445 NM_006475   | POSTN | 1 |
| hsa-miR-4453 NM_006475   | POSTN | 1 |
| hsa-miR-4462 NM_006475   | POSTN | 1 |
| hsa-miR-4516 NM_006475   | POSTN | 1 |
| hsa-miR-1343 NM_006475   | POSTN | 1 |
| hsa-miR-4701 NM_006475   | POSTN | 1 |
| hsa-miR-4704 NM_006475   | POSTN | 1 |
| hsa-miR-4757 NM_006475   | POSTN | 1 |
| hsa-miR-5007 NM_006475   | POSTN | 1 |
| hsa-miR-6131 NM_006475   | POSTN | 1 |
| hsa-miR-6783 NM_006475   | POSTN | 1 |
| hsa-miR-6795 NM_006475   | POSTN | 1 |
| hsa-miR-6817 NM_006475   | POSTN | 1 |
| hsa-miR-6825 NM_006475   | POSTN | 1 |
| hsa-miR-6846 NM_006475   | POSTN | 1 |
| hsa-miR-6885 NM_006475   | POSTN | 1 |
| hsa-miR-711C NM_006475   | POSTN | 1 |
| hsa-miR-7152 NM_006475   | POSTN | 1 |
| hsa-miR-7159 NM_006475   | POSTN | 1 |
| hsa-let-7b-5p NM_0013305 | POSTN | 1 |
| hsa-miR-103a NM_0013305  | POSTN | 1 |
| hsa-miR-103a NM_0013305  | POSTN | 1 |
| hsa-miR-103a NM_0013305  | POSTN | 1 |
| hsa-miR-107 NM_0013305   | POSTN | 1 |
| hsa-miR-128-: NM_0013305 | POSTN | 1 |
| hsa-miR-127-: NM_0013305 | POSTN | 1 |
| hsa-miR-127-: NM_0013305 | POSTN | 1 |
| hsa-miR-185-: NM_0013305 | POSTN | 1 |
| hsa-miR-329-: NM_0013305 | POSTN | 1 |
| hsa-miR-488-: NM_0013305 | POSTN | 1 |
| hsa-miR-618 NM_0013305   | POSTN | 1 |
| hsa-miR-647 NM_0013305   | POSTN | 1 |
| hsa-miR-648 NM_0013305   | POSTN | 1 |
| hsa-miR-941 NM_0013305   | POSTN | 1 |
| hsa-miR-1233 NM_0013305  | POSTN | 1 |
| hsa-miR-3127 NM_0013305  | POSTN | 1 |
| hsa-miR-3144 NM_0013305  | POSTN | 1 |
| hsa-miR-3147 NM_0013305  | POSTN | 1 |
| hsa-miR-3155 NM_0013305  | POSTN | 1 |
| hsa-miR-3174 NM_0013305  | POSTN | 1 |
| hsa-miR-4316 NM_0013305  | POSTN | 1 |
| hsa-miR-4445 NM_0013305  | POSTN | 1 |
| hsa-miR-4453 NM_0013305  | POSTN | 1 |
| hsa-miR-4462 NM_0013305  | POSTN | 1 |
| hsa-miR-4516 NM_0013305  | POSTN | 1 |
| hsa-miR-1343 NM_0013305  | POSTN | 1 |
| hsa-miR-4701 NM_0013305  | POSTN | 1 |
| hsa-miR-4704 NM_0013305  | POSTN | 1 |
| hsa-miR-4757 NM_0013305  | POSTN | 1 |
| hsa-miR-5007 NM_0013305  | POSTN | 1 |

|                                |            |
|--------------------------------|------------|
| hsa-miR-6131 NM_0013305 POSTN  | 1          |
| hsa-miR-6783 NM_0013305 POSTN  | 1          |
| hsa-miR-6799 NM_0013305 POSTN  | 1          |
| hsa-miR-6817 NM_0013305 POSTN  | 1          |
| hsa-miR-6825 NM_0013305 POSTN  | 1          |
| hsa-miR-6846 NM_0013305 POSTN  | 1          |
| hsa-miR-6885 NM_0013305 POSTN  | 1          |
| hsa-miR-7110 NM_0013305 POSTN  | 1          |
| hsa-miR-7152 NM_0013305 POSTN  | 1          |
| hsa-miR-7159 NM_0013305 POSTN  | 1          |
| hsa-let-7b-5p NM_0011359 POSTN | 1          |
| hsa-miR-103a NM_0011359 POSTN  | 1          |
| hsa-miR-103a NM_0011359 POSTN  | 1          |
| hsa-miR-107 NM_0011359 POSTN   | 1          |
| hsa-miR-128- NM_0011359 POSTN  | 1          |
| hsa-miR-127- NM_0011359 POSTN  | 1          |
| hsa-miR-127- NM_0011359 POSTN  | 1          |
| hsa-miR-127- NM_0011359 POSTN  | 1          |
| hsa-miR-185- NM_0011359 POSTN  | 1          |
| hsa-miR-329- NM_0011359 POSTN  | 1          |
| hsa-miR-488- NM_0011359 POSTN  | 1          |
| hsa-miR-618 NM_0011359 POSTN   | 1          |
| hsa-miR-647 NM_0011359 POSTN   | 1          |
| hsa-miR-648 NM_0011359 POSTN   | 1          |
| hsa-miR-941 NM_0011359 POSTN   | 1          |
| hsa-miR-1233 NM_0011359 POSTN  | 1          |
| hsa-miR-3127 NM_0011359 POSTN  | 1          |
| hsa-miR-3144 NM_0011359 POSTN  | 1          |
| hsa-miR-3147 NM_0011359 POSTN  | 1          |
| hsa-miR-3155 NM_0011359 POSTN  | 1          |
| hsa-miR-3174 NM_0011359 POSTN  | 1          |
| hsa-miR-4316 NM_0011359 POSTN  | 1          |
| hsa-miR-4445 NM_0011359 POSTN  | 1          |
| hsa-miR-4453 NM_0011359 POSTN  | 1          |
| hsa-miR-4462 NM_0011359 POSTN  | 1          |
| hsa-miR-4516 NM_0011359 POSTN  | 1          |
| hsa-miR-1343 NM_0011359 POSTN  | 1          |
| hsa-miR-4701 NM_0011359 POSTN  | 1          |
| hsa-miR-4704 NM_0011359 POSTN  | 1          |
| hsa-miR-4757 NM_0011359 POSTN  | 1          |
| hsa-miR-5007 NM_0011359 POSTN  | 1          |
| hsa-miR-6131 NM_0011359 POSTN  | 1          |
| hsa-miR-6783 NM_0011359 POSTN  | 1          |
| hsa-miR-6799 NM_0011359 POSTN  | 1          |
| hsa-miR-6817 NM_0011359 POSTN  | 1          |
| hsa-miR-6825 NM_0011359 POSTN  | 1          |
| hsa-miR-6846 NM_0011359 POSTN  | 1          |
| hsa-miR-6885 NM_0011359 POSTN  | 1          |
| hsa-miR-7110 NM_0011359 POSTN  | 1          |
| hsa-miR-7152 NM_0011359 POSTN  | 1          |
| hsa-miR-7159 NM_0011359 POSTN  | 1          |
| hsa-let-7b-5p NM_0011359 POSTN | 1          |
| hsa-miR-27a- NM_0011359 POSTN  | 1          |
| hsa-miR-103a NM_0011359 POSTN  | 1          |
| hsa-miR-103a NM_0011359 POSTN  | 1          |
| hsa-miR-127- NM_0011359 POSTN  | 1          |
| hsa-miR-127- NM_0011359 POSTN  | 1          |
| hsa-miR-188- NM_0011359 POSTN  | 1          |
| hsa-miR-378a NM_0011359 POSTN  | 1          |
| hsa-miR-488- NM_0011359 POSTN  | 1          |
| hsa-miR-618 NM_0011359 POSTN   | 1          |
| hsa-miR-647 NM_0011359 POSTN   | 1          |
| hsa-miR-648 NM_0011359 POSTN   | 1          |
| hsa-miR-941 NM_0011359 POSTN   | 1          |
| hsa-miR-2116 NM_0011359 POSTN  | 1          |
| hsa-miR-3127 NM_0011359 POSTN  | 1          |
| hsa-miR-3144 NM_0011359 POSTN  | 1          |
| hsa-miR-3147 NM_0011359 POSTN  | 1          |
| hsa-miR-3944 NM_0011359 POSTN  | 1          |
| hsa-miR-4445 NM_0011359 POSTN  | 1          |
| hsa-miR-4453 NM_0011359 POSTN  | 1          |
| hsa-miR-4462 NM_0011359 POSTN  | 1          |
| hsa-miR-4516 NM_0011359 POSTN  | 1          |
| hsa-miR-1343 NM_0011359 POSTN  | 1          |
| hsa-miR-4701 NM_0011359 POSTN  | 1          |
| hsa-miR-4704 NM_0011359 POSTN  | 1          |
| hsa-miR-4733 NM_0011359 POSTN  | 1          |
| hsa-miR-4757 NM_0011359 POSTN  | 1          |
| hsa-miR-5007 NM_0011359 POSTN  | 1          |
| hsa-miR-5581 NM_0011359 POSTN  | 1          |
| hsa-miR-6131 NM_0011359 POSTN  | 1          |
| hsa-miR-6783 NM_0011359 POSTN  | 1          |
| hsa-miR-6799 NM_0011359 POSTN  | 1          |
| hsa-miR-6817 NM_0011359 POSTN  | 1          |
| hsa-miR-6825 NM_0011359 POSTN  | 1          |
| hsa-miR-6869 NM_0011359 POSTN  | 1          |
| hsa-miR-6885 NM_0011359 POSTN  | 1          |
| hsa-miR-7152 NM_0011359 POSTN  | 1          |
| hsa-miR-7159 NM_0011359 POSTN  | 1          |
| hsa-miR-1212 NM_0011359 POSTN  | 1          |
| hsa-miR-6832 NM_001140 ALOX15  | 0.95604396 |
| hsa-miR-219a NM_001140 ALOX15  | 0.96153846 |
| hsa-miR-619- NM_001140 ALOX15  | 0.96153846 |
| hsa-miR-3116 NM_001140 ALOX15  | 0.96153846 |
| hsa-miR-3151 NM_001140 ALOX15  | 0.96153846 |



|               |           |        |            |
|---------------|-----------|--------|------------|
| hsa-miR-4429  | NM_001140 | ALOX15 | 0.96153846 |
| hsa-miR-4482  | NM_001140 | ALOX15 | 0.96153846 |
| hsa-miR-4650  | NM_001140 | ALOX15 | 0.96153846 |
| hsa-miR-6740  | NM_001140 | ALOX15 | 0.96153846 |
| hsa-miR-6860  | NM_001140 | ALOX15 | 0.96153846 |
| hsa-miR-219a  | NM_001140 | ALOX15 | 0.97435897 |
| hsa-miR-1224  | NM_001140 | ALOX15 | 0.97435897 |
| hsa-miR-4327  | NM_001140 | ALOX15 | 0.98076923 |
| hsa-miR-4674  | NM_001140 | ALOX15 | 0.98076923 |
| hsa-miR-8085  | NM_001140 | ALOX15 | 0.98076923 |
| hsa-miR-25-3j | NM_001140 | ALOX15 | 1          |
| hsa-miR-27a-  | NM_001140 | ALOX15 | 1          |
| hsa-miR-92a-  | NM_001140 | ALOX15 | 1          |
| hsa-miR-149-  | NM_001140 | ALOX15 | 1          |
| hsa-miR-193a  | NM_001140 | ALOX15 | 1          |
| hsa-miR-200c  | NM_001140 | ALOX15 | 1          |
| hsa-miR-34b-  | NM_001140 | ALOX15 | 1          |
| hsa-miR-299-  | NM_001140 | ALOX15 | 1          |
| hsa-miR-299-  | NM_001140 | ALOX15 | 1          |
| hsa-miR-367-  | NM_001140 | ALOX15 | 1          |
| hsa-miR-370-  | NM_001140 | ALOX15 | 1          |
| hsa-miR-330-  | NM_001140 | ALOX15 | 1          |
| hsa-miR-331-  | NM_001140 | ALOX15 | 1          |
| hsa-miR-433-  | NM_001140 | ALOX15 | 1          |
| hsa-miR-202-  | NM_001140 | ALOX15 | 1          |
| hsa-miR-493-  | NM_001140 | ALOX15 | 1          |
| hsa-miR-520d  | NM_001140 | ALOX15 | 1          |
| hsa-miR-583   | NM_001140 | ALOX15 | 1          |
| hsa-miR-587   | NM_001140 | ALOX15 | 1          |
| hsa-miR-601   | NM_001140 | ALOX15 | 1          |
| hsa-miR-612   | NM_001140 | ALOX15 | 1          |
| hsa-miR-548d  | NM_001140 | ALOX15 | 1          |
| hsa-miR-656-  | NM_001140 | ALOX15 | 1          |
| hsa-miR-658   | NM_001140 | ALOX15 | 1          |
| hsa-miR-320b  | NM_001140 | ALOX15 | 1          |
| hsa-miR-1296  | NM_001140 | ALOX15 | 1          |
| hsa-miR-1271  | NM_001140 | ALOX15 | 1          |
| hsa-miR-1298  | NM_001140 | ALOX15 | 1          |
| hsa-miR-937-  | NM_001140 | ALOX15 | 1          |
| hsa-miR-1178  | NM_001140 | ALOX15 | 1          |
| hsa-miR-1229  | NM_001140 | ALOX15 | 1          |
| hsa-miR-1237  | NM_001140 | ALOX15 | 1          |
| hsa-miR-1204  | NM_001140 | ALOX15 | 1          |
| hsa-miR-1207  | NM_001140 | ALOX15 | 1          |
| hsa-miR-1285  | NM_001140 | ALOX15 | 1          |
| hsa-miR-1285  | NM_001140 | ALOX15 | 1          |
| hsa-miR-1249  | NM_001140 | ALOX15 | 1          |
| hsa-miR-1249  | NM_001140 | ALOX15 | 1          |
| hsa-miR-1268  | NM_001140 | ALOX15 | 1          |
| hsa-miR-1909  | NM_001140 | ALOX15 | 1          |
| hsa-miR-2115  | NM_001140 | ALOX15 | 1          |
| hsa-miR-3122  | NM_001140 | ALOX15 | 1          |
| hsa-miR-3137  | NM_001140 | ALOX15 | 1          |
| hsa-miR-3157  | NM_001140 | ALOX15 | 1          |
| hsa-miR-3160  | NM_001140 | ALOX15 | 1          |
| hsa-miR-3160  | NM_001140 | ALOX15 | 1          |
| hsa-miR-3185  | NM_001140 | ALOX15 | 1          |
| hsa-miR-3187  | NM_001140 | ALOX15 | 1          |
| hsa-miR-3189  | NM_001140 | ALOX15 | 1          |
| hsa-miR-3620  | NM_001140 | ALOX15 | 1          |
| hsa-miR-3622  | NM_001140 | ALOX15 | 1          |
| hsa-miR-3652  | NM_001140 | ALOX15 | 1          |
| hsa-miR-3664  | NM_001140 | ALOX15 | 1          |
| hsa-miR-3911  | NM_001140 | ALOX15 | 1          |
| hsa-miR-3937  | NM_001140 | ALOX15 | 1          |
| hsa-miR-3937  | NM_001140 | ALOX15 | 1          |
| hsa-miR-1268  | NM_001140 | ALOX15 | 1          |
| hsa-miR-378e  | NM_001140 | ALOX15 | 1          |
| hsa-miR-4433  | NM_001140 | ALOX15 | 1          |
| hsa-miR-4458  | NM_001140 | ALOX15 | 1          |
| hsa-miR-4462  | NM_001140 | ALOX15 | 1          |
| hsa-miR-4463  | NM_001140 | ALOX15 | 1          |
| hsa-miR-4469  | NM_001140 | ALOX15 | 1          |
| hsa-miR-4471  | NM_001140 | ALOX15 | 1          |
| hsa-miR-4472  | NM_001140 | ALOX15 | 1          |
| hsa-miR-4474  | NM_001140 | ALOX15 | 1          |
| hsa-miR-4478  | NM_001140 | ALOX15 | 1          |
| hsa-miR-4497  | NM_001140 | ALOX15 | 1          |
| hsa-miR-4498  | NM_001140 | ALOX15 | 1          |
| hsa-miR-4499  | NM_001140 | ALOX15 | 1          |
| hsa-miR-4505  | NM_001140 | ALOX15 | 1          |
| hsa-miR-4534  | NM_001140 | ALOX15 | 1          |
| hsa-miR-4646  | NM_001140 | ALOX15 | 1          |
| hsa-miR-4646  | NM_001140 | ALOX15 | 1          |
| hsa-miR-4647  | NM_001140 | ALOX15 | 1          |
| hsa-miR-4650  | NM_001140 | ALOX15 | 1          |
| hsa-miR-4656  | NM_001140 | ALOX15 | 1          |
| hsa-miR-4664  | NM_001140 | ALOX15 | 1          |
| hsa-miR-4669  | NM_001140 | ALOX15 | 1          |
| hsa-miR-4675  | NM_001140 | ALOX15 | 1          |
| hsa-miR-1343  | NM_001140 | ALOX15 | 1          |
| hsa-miR-4689  | NM_001140 | ALOX15 | 1          |
| hsa-miR-4690  | NM_001140 | ALOX15 | 1          |
| hsa-miR-4714  | NM_001140 | ALOX15 | 1          |

|               |            |        |            |
|---------------|------------|--------|------------|
| hsa-miR-4716  | NM_001140  | ALOX15 | 1          |
| hsa-miR-4728  | NM_001140  | ALOX15 | 1          |
| hsa-miR-4734  | NM_001140  | ALOX15 | 1          |
| hsa-miR-4735  | NM_001140  | ALOX15 | 1          |
| hsa-miR-4747  | NM_001140  | ALOX15 | 1          |
| hsa-miR-4758  | NM_001140  | ALOX15 | 1          |
| hsa-miR-4765  | NM_001140  | ALOX15 | 1          |
| hsa-miR-5093  | NM_001140  | ALOX15 | 1          |
| hsa-miR-4524  | NM_001140  | ALOX15 | 1          |
| hsa-miR-5571  | NM_001140  | ALOX15 | 1          |
| hsa-miR-5571  | NM_001140  | ALOX15 | 1          |
| hsa-miR-510C  | NM_001140  | ALOX15 | 1          |
| hsa-miR-5584  | NM_001140  | ALOX15 | 1          |
| hsa-miR-5585  | NM_001140  | ALOX15 | 1          |
| hsa-miR-5684  | NM_001140  | ALOX15 | 1          |
| hsa-miR-5787  | NM_001140  | ALOX15 | 1          |
| hsa-miR-6075  | NM_001140  | ALOX15 | 1          |
| hsa-miR-6086  | NM_001140  | ALOX15 | 1          |
| hsa-miR-6127  | NM_001140  | ALOX15 | 1          |
| hsa-miR-6132  | NM_001140  | ALOX15 | 1          |
| hsa-miR-6133  | NM_001140  | ALOX15 | 1          |
| hsa-miR-548a  | NM_001140  | ALOX15 | 1          |
| hsa-miR-6716  | NM_001140  | ALOX15 | 1          |
| hsa-miR-672C  | NM_001140  | ALOX15 | 1          |
| hsa-miR-6726  | NM_001140  | ALOX15 | 1          |
| hsa-miR-6747  | NM_001140  | ALOX15 | 1          |
| hsa-miR-6754  | NM_001140  | ALOX15 | 1          |
| hsa-miR-6757  | NM_001140  | ALOX15 | 1          |
| hsa-miR-6763  | NM_001140  | ALOX15 | 1          |
| hsa-miR-6769  | NM_001140  | ALOX15 | 1          |
| hsa-miR-6771  | NM_001140  | ALOX15 | 1          |
| hsa-miR-6773  | NM_001140  | ALOX15 | 1          |
| hsa-miR-6776  | NM_001140  | ALOX15 | 1          |
| hsa-miR-6776  | NM_001140  | ALOX15 | 1          |
| hsa-miR-6804  | NM_001140  | ALOX15 | 1          |
| hsa-miR-6805  | NM_001140  | ALOX15 | 1          |
| hsa-miR-6807  | NM_001140  | ALOX15 | 1          |
| hsa-miR-6808  | NM_001140  | ALOX15 | 1          |
| hsa-miR-6809  | NM_001140  | ALOX15 | 1          |
| hsa-miR-6813  | NM_001140  | ALOX15 | 1          |
| hsa-miR-6831  | NM_001140  | ALOX15 | 1          |
| hsa-miR-6765  | NM_001140  | ALOX15 | 1          |
| hsa-miR-6861  | NM_001140  | ALOX15 | 1          |
| hsa-miR-6862  | NM_001140  | ALOX15 | 1          |
| hsa-miR-6867  | NM_001140  | ALOX15 | 1          |
| hsa-miR-687C  | NM_001140  | ALOX15 | 1          |
| hsa-miR-6876  | NM_001140  | ALOX15 | 1          |
| hsa-miR-6879  | NM_001140  | ALOX15 | 1          |
| hsa-miR-688C  | NM_001140  | ALOX15 | 1          |
| hsa-miR-6881  | NM_001140  | ALOX15 | 1          |
| hsa-miR-6883  | NM_001140  | ALOX15 | 1          |
| hsa-miR-6891  | NM_001140  | ALOX15 | 1          |
| hsa-miR-7106  | NM_001140  | ALOX15 | 1          |
| hsa-miR-4433  | NM_001140  | ALOX15 | 1          |
| hsa-miR-7855  | NM_001140  | ALOX15 | 1          |
| hsa-miR-8073  | NM_001140  | ALOX15 | 1          |
| hsa-miR-8075  | NM_001140  | ALOX15 | 1          |
| hsa-miR-9718  | NM_001140  | ALOX15 | 1          |
| hsa-miR-1039  | NM_001140  | ALOX15 | 1          |
| hsa-miR-1039  | NM_001140  | ALOX15 | 1          |
| hsa-miR-1052  | NM_001140  | ALOX15 | 1          |
| hsa-miR-1118  | NM_001140  | ALOX15 | 1          |
| hsa-miR-3139  | NM_175569  | XG     | 0.96153846 |
| hsa-miR-4329  | NM_175569  | XG     | 0.96153846 |
| hsa-miR-3614  | NM_175569  | XG     | 0.96153846 |
| hsa-miR-4733  | NM_175569  | XG     | 0.96153846 |
| hsa-miR-6888  | NM_175569  | XG     | 0.96153846 |
| hsa-miR-3139  | XM_0170297 | XG     | 0.96153846 |
| hsa-miR-4329  | XM_0170297 | XG     | 0.96153846 |
| hsa-miR-3614  | XM_0170297 | XG     | 0.96153846 |
| hsa-miR-4733  | XM_0170297 | XG     | 0.96153846 |
| hsa-miR-764   | NM_0011419 | XG     | 0.96153846 |
| hsa-miR-6888  | NM_0011419 | XG     | 0.96153846 |
| hsa-miR-1236  | NM_175569  | XG     | 0.97435897 |
| hsa-miR-4281  | NM_175569  | XG     | 0.97435897 |
| hsa-miR-483-  | NM_0011419 | XG     | 0.97435897 |
| hsa-miR-471C  | NM_0011419 | XG     | 0.98076923 |
| hsa-miR-4474  | NM_175569  | XG     | 0.99145299 |
| hsa-miR-4474  | XM_0170297 | XG     | 0.99145299 |
| hsa-miR-4474  | NM_0011419 | XG     | 0.99145299 |
| hsa-let-7e-5p | NM_175569  | XG     | 1          |
| hsa-miR-17-5j | NM_175569  | XG     | 1          |
| hsa-miR-19b-  | NM_175569  | XG     | 1          |
| hsa-miR-23a-  | NM_175569  | XG     | 1          |
| hsa-miR-24-2- | NM_175569  | XG     | 1          |
| hsa-miR-25-5j | NM_175569  | XG     | 1          |
| hsa-miR-27a-  | NM_175569  | XG     | 1          |
| hsa-miR-28-5j | NM_175569  | XG     | 1          |
| hsa-miR-31-3j | NM_175569  | XG     | 1          |
| hsa-miR-92a-  | NM_175569  | XG     | 1          |
| hsa-miR-93-3j | NM_175569  | XG     | 1          |
| hsa-miR-96-3j | NM_175569  | XG     | 1          |
| hsa-miR-99a-  | NM_175569  | XG     | 1          |
| hsa-miR-100-  | NM_175569  | XG     | 1          |

|               |           |    |   |
|---------------|-----------|----|---|
| hsa-miR-103a  | NM_175569 | XG | 1 |
| hsa-miR-106a  | NM_175569 | XG | 1 |
| hsa-miR-107   | NM_175569 | XG | 1 |
| hsa-miR-208a  | NM_175569 | XG | 1 |
| hsa-miR-208a  | NM_175569 | XG | 1 |
| hsa-miR-30c-1 | NM_175569 | XG | 1 |
| hsa-miR-181c  | NM_175569 | XG | 1 |
| hsa-miR-204-1 | NM_175569 | XG | 1 |
| hsa-miR-210-1 | NM_175569 | XG | 1 |
| hsa-miR-214-1 | NM_175569 | XG | 1 |
| hsa-miR-218-1 | NM_175569 | XG | 1 |
| hsa-let-7i-5p | NM_175569 | XG | 1 |
| hsa-miR-122-1 | NM_175569 | XG | 1 |
| hsa-miR-125b  | NM_175569 | XG | 1 |
| hsa-miR-128-1 | NM_175569 | XG | 1 |
| hsa-miR-133a  | NM_175569 | XG | 1 |
| hsa-miR-142-1 | NM_175569 | XG | 1 |
| hsa-miR-125b  | NM_175569 | XG | 1 |
| hsa-miR-184   | NM_175569 | XG | 1 |
| hsa-miR-188-1 | NM_175569 | XG | 1 |
| hsa-miR-320a  | NM_175569 | XG | 1 |
| hsa-miR-99b-1 | NM_175569 | XG | 1 |
| hsa-miR-99b-1 | NM_175569 | XG | 1 |
| hsa-miR-361-1 | NM_175569 | XG | 1 |
| hsa-miR-361-1 | NM_175569 | XG | 1 |
| hsa-miR-365b  | NM_175569 | XG | 1 |
| hsa-miR-302c  | NM_175569 | XG | 1 |
| hsa-miR-370-1 | NM_175569 | XG | 1 |
| hsa-miR-371a  | NM_175569 | XG | 1 |
| hsa-miR-377-1 | NM_175569 | XG | 1 |
| hsa-miR-377-1 | NM_175569 | XG | 1 |
| hsa-miR-377-1 | NM_175569 | XG | 1 |
| hsa-miR-380-1 | NM_175569 | XG | 1 |
| hsa-miR-381-1 | NM_175569 | XG | 1 |
| hsa-miR-330-1 | NM_175569 | XG | 1 |
| hsa-miR-151a  | NM_175569 | XG | 1 |
| hsa-miR-151a  | NM_175569 | XG | 1 |
| hsa-miR-331-1 | NM_175569 | XG | 1 |
| hsa-miR-324-1 | NM_175569 | XG | 1 |
| hsa-miR-133b  | NM_175569 | XG | 1 |
| hsa-miR-325   | NM_175569 | XG | 1 |
| hsa-miR-345-1 | NM_175569 | XG | 1 |
| hsa-miR-423-1 | NM_175569 | XG | 1 |
| hsa-miR-423-1 | NM_175569 | XG | 1 |
| hsa-miR-409-1 | NM_175569 | XG | 1 |
| hsa-miR-483-1 | NM_175569 | XG | 1 |
| hsa-miR-484   | NM_175569 | XG | 1 |
| hsa-miR-486-1 | NM_175569 | XG | 1 |
| hsa-miR-486-1 | NM_175569 | XG | 1 |
| hsa-miR-490-1 | NM_175569 | XG | 1 |
| hsa-miR-146b  | NM_175569 | XG | 1 |
| hsa-miR-493-1 | NM_175569 | XG | 1 |
| hsa-miR-494-1 | NM_175569 | XG | 1 |
| hsa-miR-193b  | NM_175569 | XG | 1 |
| hsa-miR-498-1 | NM_175569 | XG | 1 |
| hsa-miR-526b  | NM_175569 | XG | 1 |
| hsa-miR-523-1 | NM_175569 | XG | 1 |
| hsa-miR-517-1 | NM_175569 | XG | 1 |
| hsa-miR-500a  | NM_175569 | XG | 1 |
| hsa-miR-501-1 | NM_175569 | XG | 1 |
| hsa-miR-502-1 | NM_175569 | XG | 1 |
| hsa-miR-505-1 | NM_175569 | XG | 1 |
| hsa-miR-508-1 | NM_175569 | XG | 1 |
| hsa-miR-532-1 | NM_175569 | XG | 1 |
| hsa-miR-557   | NM_175569 | XG | 1 |
| hsa-miR-564   | NM_175569 | XG | 1 |
| hsa-miR-571   | NM_175569 | XG | 1 |
| hsa-miR-572   | NM_175569 | XG | 1 |
| hsa-miR-574-1 | NM_175569 | XG | 1 |
| hsa-miR-579-1 | NM_175569 | XG | 1 |
| hsa-miR-589-1 | NM_175569 | XG | 1 |
| hsa-miR-550a  | NM_175569 | XG | 1 |
| hsa-miR-595   | NM_175569 | XG | 1 |
| hsa-miR-597-1 | NM_175569 | XG | 1 |
| hsa-miR-600   | NM_175569 | XG | 1 |
| hsa-miR-610   | NM_175569 | XG | 1 |
| hsa-miR-613   | NM_175569 | XG | 1 |
| hsa-miR-614   | NM_175569 | XG | 1 |
| hsa-miR-616-1 | NM_175569 | XG | 1 |
| hsa-miR-636   | NM_175569 | XG | 1 |
| hsa-miR-642a  | NM_175569 | XG | 1 |
| hsa-miR-649   | NM_175569 | XG | 1 |
| hsa-miR-650   | NM_175569 | XG | 1 |
| hsa-miR-662   | NM_175569 | XG | 1 |
| hsa-miR-654-1 | NM_175569 | XG | 1 |
| hsa-miR-654-1 | NM_175569 | XG | 1 |
| hsa-miR-654-1 | NM_175569 | XG | 1 |
| hsa-miR-659-1 | NM_175569 | XG | 1 |
| hsa-miR-660-1 | NM_175569 | XG | 1 |
| hsa-miR-1264  | NM_175569 | XG | 1 |
| hsa-miR-668-1 | NM_175569 | XG | 1 |
| hsa-miR-550a  | NM_175569 | XG | 1 |
| hsa-miR-1271  | NM_175569 | XG | 1 |
| hsa-miR-1185  | NM_175569 | XG | 1 |
| hsa-miR-769-1 | NM_175569 | XG | 1 |

|                       |           |    |   |
|-----------------------|-----------|----|---|
| hsa-miR-675-NM_175569 | XG        | 1  |   |
| hsa-miR-298           | NM_175569 | XG | 1 |
| hsa-miR-874-NM_175569 | XG        | 1  |   |
| hsa-miR-541-NM_175569 | XG        | 1  |   |
| hsa-miR-744-NM_175569 | XG        | 1  |   |
| hsa-miR-887-NM_175569 | XG        | 1  |   |
| hsa-miR-873-NM_175569 | XG        | 1  |   |
| hsa-miR-921           | NM_175569 | XG | 1 |
| hsa-miR-936           | NM_175569 | XG | 1 |
| hsa-miR-939-NM_175569 | XG        | 1  |   |
| hsa-miR-1178          | NM_175569 | XG | 1 |
| hsa-miR-1178          | NM_175569 | XG | 1 |
| hsa-miR-1178          | NM_175569 | XG | 1 |
| hsa-miR-1225          | NM_175569 | XG | 1 |
| hsa-miR-1226          | NM_175569 | XG | 1 |
| hsa-miR-1236          | NM_175569 | XG | 1 |
| hsa-miR-1203          | NM_175569 | XG | 1 |
| hsa-miR-1205          | NM_175569 | XG | 1 |
| hsa-miR-1285          | NM_175569 | XG | 1 |
| hsa-miR-1286          | NM_175569 | XG | 1 |
| hsa-miR-1287          | NM_175569 | XG | 1 |
| hsa-miR-548k          | NM_175569 | XG | 1 |
| hsa-miR-1293          | NM_175569 | XG | 1 |
| hsa-miR-1295          | NM_175569 | XG | 1 |
| hsa-miR-1303          | NM_175569 | XG | 1 |
| hsa-miR-1247          | NM_175569 | XG | 1 |
| hsa-miR-1248          | NM_175569 | XG | 1 |
| hsa-miR-1249          | NM_175569 | XG | 1 |
| hsa-miR-1251          | NM_175569 | XG | 1 |
| hsa-miR-1251          | NM_175569 | XG | 1 |
| hsa-miR-1275          | NM_175569 | XG | 1 |
| hsa-miR-1288          | NM_175569 | XG | 1 |
| hsa-miR-1537          | NM_175569 | XG | 1 |
| hsa-miR-1915          | NM_175569 | XG | 1 |
| hsa-miR-1976          | NM_175569 | XG | 1 |
| hsa-miR-2114          | NM_175569 | XG | 1 |
| hsa-miR-2115          | NM_175569 | XG | 1 |
| hsa-miR-2116          | NM_175569 | XG | 1 |
| hsa-miR-2276          | NM_175569 | XG | 1 |
| hsa-miR-548s          | NM_175569 | XG | 1 |
| hsa-miR-3136          | NM_175569 | XG | 1 |
| hsa-miR-544t          | NM_175569 | XG | 1 |
| hsa-miR-548v          | NM_175569 | XG | 1 |
| hsa-miR-3150          | NM_175569 | XG | 1 |
| hsa-miR-3074          | NM_175569 | XG | 1 |
| hsa-miR-3157          | NM_175569 | XG | 1 |
| hsa-miR-3158          | NM_175569 | XG | 1 |
| hsa-miR-3158          | NM_175569 | XG | 1 |
| hsa-miR-3180          | NM_175569 | XG | 1 |
| hsa-miR-3180          | NM_175569 | XG | 1 |
| hsa-miR-3192          | NM_175569 | XG | 1 |
| hsa-miR-3193          | NM_175569 | XG | 1 |
| hsa-miR-3194          | NM_175569 | XG | 1 |
| hsa-miR-3195          | NM_175569 | XG | 1 |
| hsa-miR-378c          | NM_175569 | XG | 1 |
| hsa-miR-4316          | NM_175569 | XG | 1 |
| hsa-miR-4319          | NM_175569 | XG | 1 |
| hsa-miR-4322          | NM_175569 | XG | 1 |
| hsa-miR-2355          | NM_175569 | XG | 1 |
| hsa-miR-4268          | NM_175569 | XG | 1 |
| hsa-miR-4274          | NM_175569 | XG | 1 |
| hsa-miR-4274          | NM_175569 | XG | 1 |
| hsa-miR-4286          | NM_175569 | XG | 1 |
| hsa-miR-3615          | NM_175569 | XG | 1 |
| hsa-miR-3616          | NM_175569 | XG | 1 |
| hsa-miR-3620          | NM_175569 | XG | 1 |
| hsa-miR-3622          | NM_175569 | XG | 1 |
| hsa-miR-3622          | NM_175569 | XG | 1 |
| hsa-miR-3655          | NM_175569 | XG | 1 |
| hsa-miR-3664          | NM_175569 | XG | 1 |
| hsa-miR-3667          | NM_175569 | XG | 1 |
| hsa-miR-3667          | NM_175569 | XG | 1 |
| hsa-miR-3670          | NM_175569 | XG | 1 |
| hsa-miR-3677          | NM_175569 | XG | 1 |
| hsa-miR-3678          | NM_175569 | XG | 1 |
| hsa-miR-3678          | NM_175569 | XG | 1 |
| hsa-miR-3679          | NM_175569 | XG | 1 |
| hsa-miR-3680          | NM_175569 | XG | 1 |
| hsa-miR-3685          | NM_175569 | XG | 1 |
| hsa-miR-3688          | NM_175569 | XG | 1 |
| hsa-miR-3689          | NM_175569 | XG | 1 |
| hsa-miR-3692          | NM_175569 | XG | 1 |
| hsa-miR-3714          | NM_175569 | XG | 1 |
| hsa-miR-3689          | NM_175569 | XG | 1 |
| hsa-miR-3917          | NM_175569 | XG | 1 |
| hsa-miR-3918          | NM_175569 | XG | 1 |
| hsa-miR-3928          | NM_175569 | XG | 1 |
| hsa-miR-3944          | NM_175569 | XG | 1 |
| hsa-miR-550t          | NM_175569 | XG | 1 |
| hsa-miR-4425          | NM_175569 | XG | 1 |
| hsa-miR-4431          | NM_175569 | XG | 1 |
| hsa-miR-4435          | NM_175569 | XG | 1 |
| hsa-miR-4446          | NM_175569 | XG | 1 |
| hsa-miR-4447          | NM_175569 | XG | 1 |
| hsa-miR-4471          | NM_175569 | XG | 1 |

|                        |    |   |
|------------------------|----|---|
| hsa-miR-4472 NM_175569 | XG | 1 |
| hsa-miR-4473 NM_175569 | XG | 1 |
| hsa-miR-4474 NM_175569 | XG | 1 |
| hsa-miR-3688 NM_175569 | XG | 1 |
| hsa-miR-3155 NM_175569 | XG | 1 |
| hsa-miR-4489 NM_175569 | XG | 1 |
| hsa-miR-4489 NM_175569 | XG | 1 |
| hsa-miR-4510 NM_175569 | XG | 1 |
| hsa-miR-4518 NM_175569 | XG | 1 |
| hsa-miR-4525 NM_175569 | XG | 1 |
| hsa-miR-4526 NM_175569 | XG | 1 |
| hsa-miR-4534 NM_175569 | XG | 1 |
| hsa-miR-4633 NM_175569 | XG | 1 |
| hsa-miR-4638 NM_175569 | XG | 1 |
| hsa-miR-4640 NM_175569 | XG | 1 |
| hsa-miR-4640 NM_175569 | XG | 1 |
| hsa-miR-4646 NM_175569 | XG | 1 |
| hsa-miR-4650 NM_175569 | XG | 1 |
| hsa-miR-4652 NM_175569 | XG | 1 |
| hsa-miR-4655 NM_175569 | XG | 1 |
| hsa-miR-4663 NM_175569 | XG | 1 |
| hsa-miR-4663 NM_175569 | XG | 1 |
| hsa-miR-4667 NM_175569 | XG | 1 |
| hsa-miR-4671 NM_175569 | XG | 1 |
| hsa-miR-4684 NM_175569 | XG | 1 |
| hsa-miR-4687 NM_175569 | XG | 1 |
| hsa-miR-1343 NM_175569 | XG | 1 |
| hsa-miR-4691 NM_175569 | XG | 1 |
| hsa-miR-4695 NM_175569 | XG | 1 |
| hsa-miR-4707 NM_175569 | XG | 1 |
| hsa-miR-4711 NM_175569 | XG | 1 |
| hsa-miR-4712 NM_175569 | XG | 1 |
| hsa-miR-4714 NM_175569 | XG | 1 |
| hsa-miR-4715 NM_175569 | XG | 1 |
| hsa-miR-4730 NM_175569 | XG | 1 |
| hsa-miR-4747 NM_175569 | XG | 1 |
| hsa-miR-4751 NM_175569 | XG | 1 |
| hsa-miR-4758 NM_175569 | XG | 1 |
| hsa-miR-4761 NM_175569 | XG | 1 |
| hsa-miR-4768 NM_175569 | XG | 1 |
| hsa-miR-4768 NM_175569 | XG | 1 |
| hsa-miR-4436 NM_175569 | XG | 1 |
| hsa-miR-4784 NM_175569 | XG | 1 |
| hsa-miR-4793 NM_175569 | XG | 1 |
| hsa-miR-4796 NM_175569 | XG | 1 |
| hsa-miR-4797 NM_175569 | XG | 1 |
| hsa-miR-4797 NM_175569 | XG | 1 |
| hsa-miR-4797 NM_175569 | XG | 1 |
| hsa-miR-5001 NM_175569 | XG | 1 |
| hsa-miR-5007 NM_175569 | XG | 1 |
| hsa-miR-5010 NM_175569 | XG | 1 |
| hsa-miR-5047 NM_175569 | XG | 1 |
| hsa-miR-5193 NM_175569 | XG | 1 |
| hsa-miR-5571 NM_175569 | XG | 1 |
| hsa-miR-5687 NM_175569 | XG | 1 |
| hsa-miR-5693 NM_175569 | XG | 1 |
| hsa-miR-5705 NM_175569 | XG | 1 |
| hsa-miR-6068 NM_175569 | XG | 1 |
| hsa-miR-6069 NM_175569 | XG | 1 |
| hsa-miR-6086 NM_175569 | XG | 1 |
| hsa-miR-6132 NM_175569 | XG | 1 |
| hsa-miR-6500 NM_175569 | XG | 1 |
| hsa-miR-6503 NM_175569 | XG | 1 |
| hsa-miR-6508 NM_175569 | XG | 1 |
| hsa-miR-6510 NM_175569 | XG | 1 |
| hsa-miR-6515 NM_175569 | XG | 1 |
| hsa-miR-6511 NM_175569 | XG | 1 |
| hsa-miR-6726 NM_175569 | XG | 1 |
| hsa-miR-6731 NM_175569 | XG | 1 |
| hsa-miR-6735 NM_175569 | XG | 1 |
| hsa-miR-6736 NM_175569 | XG | 1 |
| hsa-miR-6738 NM_175569 | XG | 1 |
| hsa-miR-6742 NM_175569 | XG | 1 |
| hsa-miR-6747 NM_175569 | XG | 1 |
| hsa-miR-6747 NM_175569 | XG | 1 |
| hsa-miR-6749 NM_175569 | XG | 1 |
| hsa-miR-6751 NM_175569 | XG | 1 |
| hsa-miR-6756 NM_175569 | XG | 1 |
| hsa-miR-6757 NM_175569 | XG | 1 |
| hsa-miR-6759 NM_175569 | XG | 1 |
| hsa-miR-6760 NM_175569 | XG | 1 |
| hsa-miR-6766 NM_175569 | XG | 1 |
| hsa-miR-6771 NM_175569 | XG | 1 |
| hsa-miR-6772 NM_175569 | XG | 1 |
| hsa-miR-6773 NM_175569 | XG | 1 |
| hsa-miR-6776 NM_175569 | XG | 1 |
| hsa-miR-6777 NM_175569 | XG | 1 |
| hsa-miR-6782 NM_175569 | XG | 1 |
| hsa-miR-6785 NM_175569 | XG | 1 |
| hsa-miR-6789 NM_175569 | XG | 1 |
| hsa-miR-6789 NM_175569 | XG | 1 |
| hsa-miR-6791 NM_175569 | XG | 1 |
| hsa-miR-6794 NM_175569 | XG | 1 |
| hsa-miR-6797 NM_175569 | XG | 1 |

|                          |    |   |
|--------------------------|----|---|
| hsa-miR-6795 NM_175569   | XG | 1 |
| hsa-miR-6800 NM_175569   | XG | 1 |
| hsa-miR-6801 NM_175569   | XG | 1 |
| hsa-miR-6801 NM_175569   | XG | 1 |
| hsa-miR-6804 NM_175569   | XG | 1 |
| hsa-miR-6806 NM_175569   | XG | 1 |
| hsa-miR-6805 NM_175569   | XG | 1 |
| hsa-miR-6815 NM_175569   | XG | 1 |
| hsa-miR-6816 NM_175569   | XG | 1 |
| hsa-miR-6815 NM_175569   | XG | 1 |
| hsa-miR-6820 NM_175569   | XG | 1 |
| hsa-miR-6821 NM_175569   | XG | 1 |
| hsa-miR-6823 NM_175569   | XG | 1 |
| hsa-miR-6827 NM_175569   | XG | 1 |
| hsa-miR-6833 NM_175569   | XG | 1 |
| hsa-miR-6835 NM_175569   | XG | 1 |
| hsa-miR-6836 NM_175569   | XG | 1 |
| hsa-miR-6836 NM_175569   | XG | 1 |
| hsa-miR-6837 NM_175569   | XG | 1 |
| hsa-miR-6837 NM_175569   | XG | 1 |
| hsa-miR-6840 NM_175569   | XG | 1 |
| hsa-miR-6841 NM_175569   | XG | 1 |
| hsa-miR-6845 NM_175569   | XG | 1 |
| hsa-miR-6845 NM_175569   | XG | 1 |
| hsa-miR-6845 NM_175569   | XG | 1 |
| hsa-miR-6852 NM_175569   | XG | 1 |
| hsa-miR-6856 NM_175569   | XG | 1 |
| hsa-miR-6857 NM_175569   | XG | 1 |
| hsa-miR-6861 NM_175569   | XG | 1 |
| hsa-miR-6861 NM_175569   | XG | 1 |
| hsa-miR-6861 NM_175569   | XG | 1 |
| hsa-miR-6862 NM_175569   | XG | 1 |
| hsa-miR-6867 NM_175569   | XG | 1 |
| hsa-miR-6867 NM_175569   | XG | 1 |
| hsa-miR-6867 NM_175569   | XG | 1 |
| hsa-miR-6870 NM_175569   | XG | 1 |
| hsa-miR-6870 NM_175569   | XG | 1 |
| hsa-miR-6870 NM_175569   | XG | 1 |
| hsa-miR-6875 NM_175569   | XG | 1 |
| hsa-miR-6880 NM_175569   | XG | 1 |
| hsa-miR-6884 NM_175569   | XG | 1 |
| hsa-miR-6885 NM_175569   | XG | 1 |
| hsa-miR-6891 NM_175569   | XG | 1 |
| hsa-miR-6892 NM_175569   | XG | 1 |
| hsa-miR-6893 NM_175569   | XG | 1 |
| hsa-miR-6895 NM_175569   | XG | 1 |
| hsa-miR-6895 NM_175569   | XG | 1 |
| hsa-miR-6895 NM_175569   | XG | 1 |
| hsa-miR-7107 NM_175569   | XG | 1 |
| hsa-miR-7105 NM_175569   | XG | 1 |
| hsa-miR-7114 NM_175569   | XG | 1 |
| hsa-miR-7151 NM_175569   | XG | 1 |
| hsa-miR-7154 NM_175569   | XG | 1 |
| hsa-miR-4433 NM_175569   | XG | 1 |
| hsa-miR-1273 NM_175569   | XG | 1 |
| hsa-miR-7846 NM_175569   | XG | 1 |
| hsa-miR-7848 NM_175569   | XG | 1 |
| hsa-miR-7855 NM_175569   | XG | 1 |
| hsa-miR-548t NM_175569   | XG | 1 |
| hsa-miR-8056 NM_175569   | XG | 1 |
| hsa-miR-8087 NM_175569   | XG | 1 |
| hsa-miR-1035 NM_175569   | XG | 1 |
| hsa-miR-1118 NM_175569   | XG | 1 |
| hsa-miR-3085 NM_175569   | XG | 1 |
| hsa-miR-9851 NM_175569   | XG | 1 |
| hsa-miR-1211 NM_175569   | XG | 1 |
| hsa-miR-1212 NM_175569   | XG | 1 |
| hsa-miR-1212 NM_175569   | XG | 1 |
| hsa-let-7e-5p XM_0170297 | XG | 1 |
| hsa-miR-17-5j XM_0170297 | XG | 1 |
| hsa-miR-24-2 XM_0170297  | XG | 1 |
| hsa-miR-27a- XM_0170297  | XG | 1 |
| hsa-miR-28-5j XM_0170297 | XG | 1 |
| hsa-miR-31-3j XM_0170297 | XG | 1 |
| hsa-miR-96-3j XM_0170297 | XG | 1 |
| hsa-miR-99a- XM_0170297  | XG | 1 |
| hsa-miR-100- XM_0170297  | XG | 1 |
| hsa-miR-103a XM_0170297  | XG | 1 |
| hsa-miR-106a XM_0170297  | XG | 1 |
| hsa-miR-107 XM_0170297   | XG | 1 |
| hsa-miR-208a XM_0170297  | XG | 1 |
| hsa-miR-208a XM_0170297  | XG | 1 |
| hsa-miR-181c XM_0170297  | XG | 1 |
| hsa-miR-204- XM_0170297  | XG | 1 |
| hsa-miR-210- XM_0170297  | XG | 1 |
| hsa-miR-214- XM_0170297  | XG | 1 |
| hsa-miR-218- XM_0170297  | XG | 1 |
| hsa-let-7i-5p XM_0170297 | XG | 1 |

|                            |   |
|----------------------------|---|
| hsa-miR-122-XM_0170297 XG  | 1 |
| hsa-miR-125t XM_0170297 XG | 1 |
| hsa-miR-133a XM_0170297 XG | 1 |
| hsa-miR-142-XM_0170297 XG  | 1 |
| hsa-miR-125t XM_0170297 XG | 1 |
| hsa-miR-184 XM_0170297 XG  | 1 |
| hsa-miR-188-XM_0170297 XG  | 1 |
| hsa-miR-320a XM_0170297 XG | 1 |
| hsa-miR-99b-XM_0170297 XG  | 1 |
| hsa-miR-99b-XM_0170297 XG  | 1 |
| hsa-miR-361-XM_0170297 XG  | 1 |
| hsa-miR-361-XM_0170297 XG  | 1 |
| hsa-miR-365t XM_0170297 XG | 1 |
| hsa-miR-302c XM_0170297 XG | 1 |
| hsa-miR-370-XM_0170297 XG  | 1 |
| hsa-miR-371a XM_0170297 XG | 1 |
| hsa-miR-377-XM_0170297 XG  | 1 |
| hsa-miR-377-XM_0170297 XG  | 1 |
| hsa-miR-380-XM_0170297 XG  | 1 |
| hsa-miR-381-XM_0170297 XG  | 1 |
| hsa-miR-151a XM_0170297 XG | 1 |
| hsa-miR-151a XM_0170297 XG | 1 |
| hsa-miR-331-XM_0170297 XG  | 1 |
| hsa-miR-324-XM_0170297 XG  | 1 |
| hsa-miR-133t XM_0170297 XG | 1 |
| hsa-miR-325 XM_0170297 XG  | 1 |
| hsa-miR-345-XM_0170297 XG  | 1 |
| hsa-miR-423-XM_0170297 XG  | 1 |
| hsa-miR-409-XM_0170297 XG  | 1 |
| hsa-miR-483-XM_0170297 XG  | 1 |
| hsa-miR-484 XM_0170297 XG  | 1 |
| hsa-miR-486-XM_0170297 XG  | 1 |
| hsa-miR-490-XM_0170297 XG  | 1 |
| hsa-miR-146t XM_0170297 XG | 1 |
| hsa-miR-493-XM_0170297 XG  | 1 |
| hsa-miR-494-XM_0170297 XG  | 1 |
| hsa-miR-193t XM_0170297 XG | 1 |
| hsa-miR-498-XM_0170297 XG  | 1 |
| hsa-miR-526t XM_0170297 XG | 1 |
| hsa-miR-523-XM_0170297 XG  | 1 |
| hsa-miR-517-XM_0170297 XG  | 1 |
| hsa-miR-501-XM_0170297 XG  | 1 |
| hsa-miR-502-XM_0170297 XG  | 1 |
| hsa-miR-505-XM_0170297 XG  | 1 |
| hsa-miR-508-XM_0170297 XG  | 1 |
| hsa-miR-532-XM_0170297 XG  | 1 |
| hsa-miR-571 XM_0170297 XG  | 1 |
| hsa-miR-572 XM_0170297 XG  | 1 |
| hsa-miR-574-XM_0170297 XG  | 1 |
| hsa-miR-579-XM_0170297 XG  | 1 |
| hsa-miR-589-XM_0170297 XG  | 1 |
| hsa-miR-550a XM_0170297 XG | 1 |
| hsa-miR-595 XM_0170297 XG  | 1 |
| hsa-miR-597-XM_0170297 XG  | 1 |
| hsa-miR-598-XM_0170297 XG  | 1 |
| hsa-miR-600 XM_0170297 XG  | 1 |
| hsa-miR-610 XM_0170297 XG  | 1 |
| hsa-miR-613 XM_0170297 XG  | 1 |
| hsa-miR-616-XM_0170297 XG  | 1 |
| hsa-miR-649 XM_0170297 XG  | 1 |
| hsa-miR-654-XM_0170297 XG  | 1 |
| hsa-miR-654-XM_0170297 XG  | 1 |
| hsa-miR-654-XM_0170297 XG  | 1 |
| hsa-miR-659-XM_0170297 XG  | 1 |
| hsa-miR-660-XM_0170297 XG  | 1 |
| hsa-miR-1264 XM_0170297 XG | 1 |
| hsa-miR-668-XM_0170297 XG  | 1 |
| hsa-miR-550a XM_0170297 XG | 1 |
| hsa-miR-1271 XM_0170297 XG | 1 |
| hsa-miR-1185 XM_0170297 XG | 1 |
| hsa-miR-769-XM_0170297 XG  | 1 |
| hsa-miR-675-XM_0170297 XG  | 1 |
| hsa-miR-298 XM_0170297 XG  | 1 |
| hsa-miR-874-XM_0170297 XG  | 1 |
| hsa-miR-541-XM_0170297 XG  | 1 |
| hsa-miR-744-XM_0170297 XG  | 1 |
| hsa-miR-887-XM_0170297 XG  | 1 |
| hsa-miR-936 XM_0170297 XG  | 1 |
| hsa-miR-1178 XM_0170297 XG | 1 |
| hsa-miR-1178 XM_0170297 XG | 1 |
| hsa-miR-1225 XM_0170297 XG | 1 |
| hsa-miR-1226 XM_0170297 XG | 1 |
| hsa-miR-1203 XM_0170297 XG | 1 |
| hsa-miR-1205 XM_0170297 XG | 1 |
| hsa-miR-1285 XM_0170297 XG | 1 |
| hsa-miR-548k XM_0170297 XG | 1 |
| hsa-miR-1293 XM_0170297 XG | 1 |
| hsa-miR-1295 XM_0170297 XG | 1 |
| hsa-miR-1303 XM_0170297 XG | 1 |
| hsa-miR-1247 XM_0170297 XG | 1 |
| hsa-miR-1248 XM_0170297 XG | 1 |
| hsa-miR-1246 XM_0170297 XG | 1 |
| hsa-miR-1251 XM_0170297 XG | 1 |
| hsa-miR-1251 XM_0170297 XG | 1 |

|                            |   |
|----------------------------|---|
| hsa-miR-1275 XM_0170297 XG | 1 |
| hsa-miR-1537 XM_0170297 XG | 1 |
| hsa-miR-1976 XM_0170297 XG | 1 |
| hsa-miR-2115 XM_0170297 XG | 1 |
| hsa-miR-2116 XM_0170297 XG | 1 |
| hsa-miR-548s XM_0170297 XG | 1 |
| hsa-miR-3136 XM_0170297 XG | 1 |
| hsa-miR-544t XM_0170297 XG | 1 |
| hsa-miR-548v XM_0170297 XG | 1 |
| hsa-miR-3150 XM_0170297 XG | 1 |
| hsa-miR-3074 XM_0170297 XG | 1 |
| hsa-miR-3157 XM_0170297 XG | 1 |
| hsa-miR-3158 XM_0170297 XG | 1 |
| hsa-miR-3180 XM_0170297 XG | 1 |
| hsa-miR-3193 XM_0170297 XG | 1 |
| hsa-miR-3194 XM_0170297 XG | 1 |
| hsa-miR-3195 XM_0170297 XG | 1 |
| hsa-miR-378c XM_0170297 XG | 1 |
| hsa-miR-4316 XM_0170297 XG | 1 |
| hsa-miR-4322 XM_0170297 XG | 1 |
| hsa-miR-4268 XM_0170297 XG | 1 |
| hsa-miR-4274 XM_0170297 XG | 1 |
| hsa-miR-4274 XM_0170297 XG | 1 |
| hsa-miR-4286 XM_0170297 XG | 1 |
| hsa-miR-3615 XM_0170297 XG | 1 |
| hsa-miR-3616 XM_0170297 XG | 1 |
| hsa-miR-3620 XM_0170297 XG | 1 |
| hsa-miR-3622 XM_0170297 XG | 1 |
| hsa-miR-3622 XM_0170297 XG | 1 |
| hsa-miR-3664 XM_0170297 XG | 1 |
| hsa-miR-3667 XM_0170297 XG | 1 |
| hsa-miR-3667 XM_0170297 XG | 1 |
| hsa-miR-3670 XM_0170297 XG | 1 |
| hsa-miR-3678 XM_0170297 XG | 1 |
| hsa-miR-3675 XM_0170297 XG | 1 |
| hsa-miR-3680 XM_0170297 XG | 1 |
| hsa-miR-3685 XM_0170297 XG | 1 |
| hsa-miR-3688 XM_0170297 XG | 1 |
| hsa-miR-3688 XM_0170297 XG | 1 |
| hsa-miR-3692 XM_0170297 XG | 1 |
| hsa-miR-3714 XM_0170297 XG | 1 |
| hsa-miR-3685 XM_0170297 XG | 1 |
| hsa-miR-3917 XM_0170297 XG | 1 |
| hsa-miR-3928 XM_0170297 XG | 1 |
| hsa-miR-550t XM_0170297 XG | 1 |
| hsa-miR-4425 XM_0170297 XG | 1 |
| hsa-miR-4431 XM_0170297 XG | 1 |
| hsa-miR-4433 XM_0170297 XG | 1 |
| hsa-miR-4435 XM_0170297 XG | 1 |
| hsa-miR-4446 XM_0170297 XG | 1 |
| hsa-miR-4447 XM_0170297 XG | 1 |
| hsa-miR-4471 XM_0170297 XG | 1 |
| hsa-miR-4473 XM_0170297 XG | 1 |
| hsa-miR-4474 XM_0170297 XG | 1 |
| hsa-miR-3689 XM_0170297 XG | 1 |
| hsa-miR-3155 XM_0170297 XG | 1 |
| hsa-miR-4485 XM_0170297 XG | 1 |
| hsa-miR-4518 XM_0170297 XG | 1 |
| hsa-miR-4525 XM_0170297 XG | 1 |
| hsa-miR-4526 XM_0170297 XG | 1 |
| hsa-miR-4534 XM_0170297 XG | 1 |
| hsa-miR-4638 XM_0170297 XG | 1 |
| hsa-miR-4640 XM_0170297 XG | 1 |
| hsa-miR-4650 XM_0170297 XG | 1 |
| hsa-miR-4652 XM_0170297 XG | 1 |
| hsa-miR-4655 XM_0170297 XG | 1 |
| hsa-miR-4663 XM_0170297 XG | 1 |
| hsa-miR-4663 XM_0170297 XG | 1 |
| hsa-miR-4667 XM_0170297 XG | 1 |
| hsa-miR-4684 XM_0170297 XG | 1 |
| hsa-miR-4687 XM_0170297 XG | 1 |
| hsa-miR-1343 XM_0170297 XG | 1 |
| hsa-miR-4691 XM_0170297 XG | 1 |
| hsa-miR-4707 XM_0170297 XG | 1 |
| hsa-miR-4712 XM_0170297 XG | 1 |
| hsa-miR-4714 XM_0170297 XG | 1 |
| hsa-miR-4715 XM_0170297 XG | 1 |
| hsa-miR-4730 XM_0170297 XG | 1 |
| hsa-miR-4747 XM_0170297 XG | 1 |
| hsa-miR-4751 XM_0170297 XG | 1 |
| hsa-miR-4758 XM_0170297 XG | 1 |
| hsa-miR-4761 XM_0170297 XG | 1 |
| hsa-miR-4768 XM_0170297 XG | 1 |
| hsa-miR-4768 XM_0170297 XG | 1 |
| hsa-miR-4436 XM_0170297 XG | 1 |
| hsa-miR-2467 XM_0170297 XG | 1 |
| hsa-miR-4793 XM_0170297 XG | 1 |
| hsa-miR-4796 XM_0170297 XG | 1 |
| hsa-miR-4797 XM_0170297 XG | 1 |
| hsa-miR-4797 XM_0170297 XG | 1 |
| hsa-miR-4797 XM_0170297 XG | 1 |
| hsa-miR-5001 XM_0170297 XG | 1 |
| hsa-miR-5010 XM_0170297 XG | 1 |
| hsa-miR-5192 XM_0170297 XG | 1 |



|                            |   |
|----------------------------|---|
| hsa-miR-5193 XM_0170297 XG | 1 |
| hsa-miR-5571 XM_0170297 XG | 1 |
| hsa-miR-5687 XM_0170297 XG | 1 |
| hsa-miR-5693 XM_0170297 XG | 1 |
| hsa-miR-6068 XM_0170297 XG | 1 |
| hsa-miR-6086 XM_0170297 XG | 1 |
| hsa-miR-6132 XM_0170297 XG | 1 |
| hsa-miR-6503 XM_0170297 XG | 1 |
| hsa-miR-6508 XM_0170297 XG | 1 |
| hsa-miR-651C XM_0170297 XG | 1 |
| hsa-miR-6515 XM_0170297 XG | 1 |
| hsa-miR-6511 XM_0170297 XG | 1 |
| hsa-miR-6726 XM_0170297 XG | 1 |
| hsa-miR-6731 XM_0170297 XG | 1 |
| hsa-miR-6735 XM_0170297 XG | 1 |
| hsa-miR-6736 XM_0170297 XG | 1 |
| hsa-miR-6747 XM_0170297 XG | 1 |
| hsa-miR-6747 XM_0170297 XG | 1 |
| hsa-miR-6749 XM_0170297 XG | 1 |
| hsa-miR-6751 XM_0170297 XG | 1 |
| hsa-miR-6756 XM_0170297 XG | 1 |
| hsa-miR-6757 XM_0170297 XG | 1 |
| hsa-miR-6755 XM_0170297 XG | 1 |
| hsa-miR-676C XM_0170297 XG | 1 |
| hsa-miR-6766 XM_0170297 XG | 1 |
| hsa-miR-6771 XM_0170297 XG | 1 |
| hsa-miR-6772 XM_0170297 XG | 1 |
| hsa-miR-6773 XM_0170297 XG | 1 |
| hsa-miR-6776 XM_0170297 XG | 1 |
| hsa-miR-6777 XM_0170297 XG | 1 |
| hsa-miR-6782 XM_0170297 XG | 1 |
| hsa-miR-6785 XM_0170297 XG | 1 |
| hsa-miR-6794 XM_0170297 XG | 1 |
| hsa-miR-6797 XM_0170297 XG | 1 |
| hsa-miR-6795 XM_0170297 XG | 1 |
| hsa-miR-680C XM_0170297 XG | 1 |
| hsa-miR-6801 XM_0170297 XG | 1 |
| hsa-miR-6801 XM_0170297 XG | 1 |
| hsa-miR-6804 XM_0170297 XG | 1 |
| hsa-miR-6806 XM_0170297 XG | 1 |
| hsa-miR-6809 XM_0170297 XG | 1 |
| hsa-miR-6815 XM_0170297 XG | 1 |
| hsa-miR-6816 XM_0170297 XG | 1 |
| hsa-miR-6821 XM_0170297 XG | 1 |
| hsa-miR-6823 XM_0170297 XG | 1 |
| hsa-miR-6823 XM_0170297 XG | 1 |
| hsa-miR-6827 XM_0170297 XG | 1 |
| hsa-miR-6833 XM_0170297 XG | 1 |
| hsa-miR-6835 XM_0170297 XG | 1 |
| hsa-miR-6836 XM_0170297 XG | 1 |
| hsa-miR-6837 XM_0170297 XG | 1 |
| hsa-miR-6837 XM_0170297 XG | 1 |
| hsa-miR-6841 XM_0170297 XG | 1 |
| hsa-miR-6845 XM_0170297 XG | 1 |
| hsa-miR-6845 XM_0170297 XG | 1 |
| hsa-miR-6852 XM_0170297 XG | 1 |
| hsa-miR-6856 XM_0170297 XG | 1 |
| hsa-miR-6857 XM_0170297 XG | 1 |
| hsa-miR-6857 XM_0170297 XG | 1 |
| hsa-miR-6857 XM_0170297 XG | 1 |
| hsa-miR-6861 XM_0170297 XG | 1 |
| hsa-miR-6861 XM_0170297 XG | 1 |
| hsa-miR-6867 XM_0170297 XG | 1 |
| hsa-miR-6867 XM_0170297 XG | 1 |
| hsa-miR-687C XM_0170297 XG | 1 |
| hsa-miR-687C XM_0170297 XG | 1 |
| hsa-miR-6875 XM_0170297 XG | 1 |
| hsa-miR-6875 XM_0170297 XG | 1 |
| hsa-miR-688C XM_0170297 XG | 1 |
| hsa-miR-6884 XM_0170297 XG | 1 |
| hsa-miR-6885 XM_0170297 XG | 1 |
| hsa-miR-6891 XM_0170297 XG | 1 |
| hsa-miR-6892 XM_0170297 XG | 1 |
| hsa-miR-6893 XM_0170297 XG | 1 |
| hsa-miR-7107 XM_0170297 XG | 1 |
| hsa-miR-7114 XM_0170297 XG | 1 |
| hsa-miR-7151 XM_0170297 XG | 1 |
| hsa-miR-7154 XM_0170297 XG | 1 |
| hsa-miR-4433 XM_0170297 XG | 1 |
| hsa-miR-1273 XM_0170297 XG | 1 |
| hsa-miR-7846 XM_0170297 XG | 1 |
| hsa-miR-7848 XM_0170297 XG | 1 |
| hsa-miR-7855 XM_0170297 XG | 1 |
| hsa-miR-548t XM_0170297 XG | 1 |
| hsa-miR-8055 XM_0170297 XG | 1 |
| hsa-miR-8056 XM_0170297 XG | 1 |
| hsa-miR-8087 XM_0170297 XG | 1 |
| hsa-miR-1035 XM_0170297 XG | 1 |
| hsa-miR-1118 XM_0170297 XG | 1 |
| hsa-miR-3085 XM_0170297 XG | 1 |
| hsa-miR-1211 XM_0170297 XG | 1 |

|                             |   |
|-----------------------------|---|
| hsa-miR-1212 XM_0170297 XG  | 1 |
| hsa-let-7e-5p NM_0011419 XG | 1 |
| hsa-miR-24-2 NM_0011419 XG  | 1 |
| hsa-miR-28-5j NM_0011419 XG | 1 |
| hsa-miR-181c NM_0011419 XG  | 1 |
| hsa-miR-210-1 NM_0011419 XG | 1 |
| hsa-miR-122-1 NM_0011419 XG | 1 |
| hsa-miR-125b NM_0011419 XG  | 1 |
| hsa-miR-184 NM_0011419 XG   | 1 |
| hsa-miR-188-1 NM_0011419 XG | 1 |
| hsa-miR-361-1 NM_0011419 XG | 1 |
| hsa-miR-365b NM_0011419 XG  | 1 |
| hsa-miR-377-1 NM_0011419 XG | 1 |
| hsa-miR-423-1 NM_0011419 XG | 1 |
| hsa-miR-423-2 NM_0011419 XG | 1 |
| hsa-miR-423-3 NM_0011419 XG | 1 |
| hsa-miR-409-1 NM_0011419 XG | 1 |
| hsa-miR-486-1 NM_0011419 XG | 1 |
| hsa-miR-146b NM_0011419 XG  | 1 |
| hsa-miR-493-1 NM_0011419 XG | 1 |
| hsa-miR-494-1 NM_0011419 XG | 1 |
| hsa-miR-193b NM_0011419 XG  | 1 |
| hsa-miR-517-1 NM_0011419 XG | 1 |
| hsa-miR-500a NM_0011419 XG  | 1 |
| hsa-miR-501-1 NM_0011419 XG | 1 |
| hsa-miR-505-1 NM_0011419 XG | 1 |
| hsa-miR-508-1 NM_0011419 XG | 1 |
| hsa-miR-574-1 NM_0011419 XG | 1 |
| hsa-miR-589-1 NM_0011419 XG | 1 |
| hsa-miR-597-1 NM_0011419 XG | 1 |
| hsa-miR-649 NM_0011419 XG   | 1 |
| hsa-miR-656-1 NM_0011419 XG | 1 |
| hsa-miR-659-1 NM_0011419 XG | 1 |
| hsa-miR-660-1 NM_0011419 XG | 1 |
| hsa-miR-769-1 NM_0011419 XG | 1 |
| hsa-miR-298 NM_0011419 XG   | 1 |
| hsa-miR-744-1 NM_0011419 XG | 1 |
| hsa-miR-873-1 NM_0011419 XG | 1 |
| hsa-miR-921 NM_0011419 XG   | 1 |
| hsa-miR-936 NM_0011419 XG   | 1 |
| hsa-miR-939-1 NM_0011419 XG | 1 |
| hsa-miR-1178 NM_0011419 XG  | 1 |
| hsa-miR-1178 NM_0011419 XG  | 1 |
| hsa-miR-1225 NM_0011419 XG  | 1 |
| hsa-miR-1203 NM_0011419 XG  | 1 |
| hsa-miR-1248 NM_0011419 XG  | 1 |
| hsa-miR-1915 NM_0011419 XG  | 1 |
| hsa-miR-2116 NM_0011419 XG  | 1 |
| hsa-miR-3150 NM_0011419 XG  | 1 |
| hsa-miR-3155 NM_0011419 XG  | 1 |
| hsa-miR-3158 NM_0011419 XG  | 1 |
| hsa-miR-3180 NM_0011419 XG  | 1 |
| hsa-miR-3192 NM_0011419 XG  | 1 |
| hsa-miR-3195 NM_0011419 XG  | 1 |
| hsa-miR-4316 NM_0011419 XG  | 1 |
| hsa-miR-3620 NM_0011419 XG  | 1 |
| hsa-miR-3622 NM_0011419 XG  | 1 |
| hsa-miR-3655 NM_0011419 XG  | 1 |
| hsa-miR-3664 NM_0011419 XG  | 1 |
| hsa-miR-3667 NM_0011419 XG  | 1 |
| hsa-miR-3670 NM_0011419 XG  | 1 |
| hsa-miR-3677 NM_0011419 XG  | 1 |
| hsa-miR-3679 NM_0011419 XG  | 1 |
| hsa-miR-3688 NM_0011419 XG  | 1 |
| hsa-miR-3692 NM_0011419 XG  | 1 |
| hsa-miR-3714 NM_0011419 XG  | 1 |
| hsa-miR-3913 NM_0011419 XG  | 1 |
| hsa-miR-3944 NM_0011419 XG  | 1 |
| hsa-miR-4431 NM_0011419 XG  | 1 |
| hsa-miR-4433 NM_0011419 XG  | 1 |
| hsa-miR-4435 NM_0011419 XG  | 1 |
| hsa-miR-4447 NM_0011419 XG  | 1 |
| hsa-miR-4472 NM_0011419 XG  | 1 |
| hsa-miR-4474 NM_0011419 XG  | 1 |
| hsa-miR-3155 NM_0011419 XG  | 1 |
| hsa-miR-4534 NM_0011419 XG  | 1 |
| hsa-miR-4638 NM_0011419 XG  | 1 |
| hsa-miR-4640 NM_0011419 XG  | 1 |
| hsa-miR-4655 NM_0011419 XG  | 1 |
| hsa-miR-4663 NM_0011419 XG  | 1 |
| hsa-miR-4667 NM_0011419 XG  | 1 |
| hsa-miR-4695 NM_0011419 XG  | 1 |
| hsa-miR-4700 NM_0011419 XG  | 1 |
| hsa-miR-4711 NM_0011419 XG  | 1 |
| hsa-miR-4714 NM_0011419 XG  | 1 |
| hsa-miR-4715 NM_0011419 XG  | 1 |
| hsa-miR-4730 NM_0011419 XG  | 1 |
| hsa-miR-4733 NM_0011419 XG  | 1 |
| hsa-miR-4747 NM_0011419 XG  | 1 |
| hsa-miR-4751 NM_0011419 XG  | 1 |
| hsa-miR-4768 NM_0011419 XG  | 1 |
| hsa-miR-4772 NM_0011419 XG  | 1 |
| hsa-miR-4793 NM_0011419 XG  | 1 |
| hsa-miR-4796 NM_0011419 XG  | 1 |

|                             |            |
|-----------------------------|------------|
| hsa-miR-4797 NM_0011419 XG  | 1          |
| hsa-miR-5001 NM_0011419 XG  | 1          |
| hsa-miR-5010 NM_0011419 XG  | 1          |
| hsa-miR-5571 NM_0011419 XG  | 1          |
| hsa-miR-5687 NM_0011419 XG  | 1          |
| hsa-miR-5693 NM_0011419 XG  | 1          |
| hsa-miR-6503 NM_0011419 XG  | 1          |
| hsa-miR-6510 NM_0011419 XG  | 1          |
| hsa-miR-6511 NM_0011419 XG  | 1          |
| hsa-miR-6745 NM_0011419 XG  | 1          |
| hsa-miR-6747 NM_0011419 XG  | 1          |
| hsa-miR-6754 NM_0011419 XG  | 1          |
| hsa-miR-6757 NM_0011419 XG  | 1          |
| hsa-miR-6771 NM_0011419 XG  | 1          |
| hsa-miR-6776 NM_0011419 XG  | 1          |
| hsa-miR-6777 NM_0011419 XG  | 1          |
| hsa-miR-6795 NM_0011419 XG  | 1          |
| hsa-miR-6795 NM_0011419 XG  | 1          |
| hsa-miR-6800 NM_0011419 XG  | 1          |
| hsa-miR-6803 NM_0011419 XG  | 1          |
| hsa-miR-6815 NM_0011419 XG  | 1          |
| hsa-miR-6819 NM_0011419 XG  | 1          |
| hsa-miR-6820 NM_0011419 XG  | 1          |
| hsa-miR-6833 NM_0011419 XG  | 1          |
| hsa-miR-6836 NM_0011419 XG  | 1          |
| hsa-miR-6856 NM_0011419 XG  | 1          |
| hsa-miR-6857 NM_0011419 XG  | 1          |
| hsa-miR-6861 NM_0011419 XG  | 1          |
| hsa-miR-6862 NM_0011419 XG  | 1          |
| hsa-miR-6870 NM_0011419 XG  | 1          |
| hsa-miR-6870 NM_0011419 XG  | 1          |
| hsa-miR-687C NM_0011419 XG  | 1          |
| hsa-miR-6880 NM_0011419 XG  | 1          |
| hsa-miR-6892 NM_0011419 XG  | 1          |
| hsa-miR-6893 NM_0011419 XG  | 1          |
| hsa-miR-6895 NM_0011419 XG  | 1          |
| hsa-miR-7107 NM_0011419 XG  | 1          |
| hsa-miR-1273 NM_0011419 XG  | 1          |
| hsa-miR-8055 NM_0011419 XG  | 1          |
| hsa-miR-1035 NM_0011419 XG  | 1          |
| hsa-miR-1035 NM_0011419 XG  | 1          |
| hsa-miR-1118 NM_0011419 XG  | 1          |
| hsa-miR-3085 NM_0011419 XG  | 1          |
| hsa-miR-1211 NM_0011419 XG  | 1          |
| hsa-miR-1211 NM_0011419 XG  | 1          |
| hsa-miR-1211 NM_0011419 XG  | 1          |
| hsa-miR-1212 NM_0011419 XG  | 1          |
| hsa-miR-4715 NM_183380 DST  | 0.95384615 |
| hsa-miR-6516 NM_183380 DST  | 0.95384615 |
| hsa-miR-6516 NM_015548 DST  | 0.95384615 |
| hsa-miR-4715 NM_0013747 DST | 0.95384615 |
| hsa-miR-6516 NM_0013747 DST | 0.95384615 |
| hsa-miR-4715 NM_0013747 DST | 0.95384615 |
| hsa-miR-6516 NM_0013747 DST | 0.95384615 |
| hsa-miR-6516 NM_0011447 DST | 0.95384615 |
| hsa-miR-648 NM_183380 DST   | 0.96153846 |
| hsa-miR-130a NM_015548 DST  | 0.96153846 |
| hsa-miR-548c NM_015548 DST  | 0.96153846 |
| hsa-miR-4498 NM_015548 DST  | 0.96153846 |
| hsa-miR-2467 NM_015548 DST  | 0.96153846 |
| hsa-miR-648 NM_0013747 DST  | 0.96153846 |
| hsa-miR-648 NM_0013747 DST  | 0.96153846 |
| hsa-miR-1295 NM_001723 DST  | 0.96153846 |
| hsa-miR-4742 NM_001723 DST  | 0.96153846 |
| hsa-miR-6505 NM_001723 DST  | 0.96153846 |
| hsa-miR-6514 NM_001723 DST  | 0.96153846 |
| hsa-miR-6762 NM_001723 DST  | 0.96153846 |
| hsa-miR-6892 NM_001723 DST  | 0.96153846 |
| hsa-miR-7110 NM_001723 DST  | 0.96153846 |
| hsa-miR-1180 NM_0011447 DST | 0.96153846 |
| hsa-miR-548c NM_0011447 DST | 0.96153846 |
| hsa-miR-4498 NM_0011447 DST | 0.96153846 |
| hsa-miR-2467 NM_0011447 DST | 0.96153846 |
| hsa-miR-7113 NM_001723 DST  | 0.96923077 |
| hsa-miR-4443 NM_001723 DST  | 0.97435897 |
| hsa-miR-6828 NM_001723 DST  | 0.97435897 |
| hsa-miR-7843 NM_001723 DST  | 0.97435897 |
| hsa-miR-15a- NM_183380 DST  | 1          |
| hsa-miR-92a- NM_183380 DST  | 1          |
| hsa-miR-182- NM_183380 DST  | 1          |
| hsa-miR-221- NM_183380 DST  | 1          |
| hsa-miR-130a NM_183380 DST  | 1          |
| hsa-miR-372- NM_183380 DST  | 1          |
| hsa-miR-148b NM_183380 DST  | 1          |
| hsa-miR-493- NM_183380 DST  | 1          |
| hsa-miR-632 NM_183380 DST   | 1          |
| hsa-miR-640 NM_183380 DST   | 1          |
| hsa-miR-1207 NM_183380 DST  | 1          |
| hsa-miR-1208 NM_183380 DST  | 1          |
| hsa-miR-548c NM_183380 DST  | 1          |
| hsa-miR-3125 NM_183380 DST  | 1          |
| hsa-miR-3132 NM_183380 DST  | 1          |
| hsa-miR-3166 NM_183380 DST  | 1          |
| hsa-miR-4318 NM_183380 DST  | 1          |
| hsa-miR-4263 NM_183380 DST  | 1          |

|                          |     |   |
|--------------------------|-----|---|
| hsa-miR-3682 NM_183380   | DST | 1 |
| hsa-miR-4669 NM_183380   | DST | 1 |
| hsa-miR-4726 NM_183380   | DST | 1 |
| hsa-miR-4742 NM_183380   | DST | 1 |
| hsa-miR-4747 NM_183380   | DST | 1 |
| hsa-miR-2467 NM_183380   | DST | 1 |
| hsa-miR-4789 NM_183380   | DST | 1 |
| hsa-miR-5693 NM_183380   | DST | 1 |
| hsa-miR-6501 NM_183380   | DST | 1 |
| hsa-miR-807C NM_183380   | DST | 1 |
| hsa-miR-8085 NM_183380   | DST | 1 |
| hsa-miR-1052 NM_183380   | DST | 1 |
| hsa-miR-1212 NM_183380   | DST | 1 |
| hsa-miR-1212 NM_183380   | DST | 1 |
| hsa-miR-32-3j NM_015548  | DST | 1 |
| hsa-miR-218-; NM_015548  | DST | 1 |
| hsa-miR-135a NM_015548   | DST | 1 |
| hsa-miR-134-; NM_015548  | DST | 1 |
| hsa-miR-302a NM_015548   | DST | 1 |
| hsa-miR-302c NM_015548   | DST | 1 |
| hsa-miR-323a NM_015548   | DST | 1 |
| hsa-miR-148b NM_015548   | DST | 1 |
| hsa-miR-632 NM_015548    | DST | 1 |
| hsa-miR-640 NM_015548    | DST | 1 |
| hsa-miR-648 NM_015548    | DST | 1 |
| hsa-miR-1205 NM_015548   | DST | 1 |
| hsa-miR-3132 NM_015548   | DST | 1 |
| hsa-miR-3137 NM_015548   | DST | 1 |
| hsa-miR-3147 NM_015548   | DST | 1 |
| hsa-miR-3169 NM_015548   | DST | 1 |
| hsa-miR-3186 NM_015548   | DST | 1 |
| hsa-miR-4266 NM_015548   | DST | 1 |
| hsa-miR-3671 NM_015548   | DST | 1 |
| hsa-miR-3682 NM_015548   | DST | 1 |
| hsa-miR-3908 NM_015548   | DST | 1 |
| hsa-miR-4455 NM_015548   | DST | 1 |
| hsa-miR-4457 NM_015548   | DST | 1 |
| hsa-miR-4474 NM_015548   | DST | 1 |
| hsa-miR-4489 NM_015548   | DST | 1 |
| hsa-miR-4489 NM_015548   | DST | 1 |
| hsa-miR-4669 NM_015548   | DST | 1 |
| hsa-miR-4687 NM_015548   | DST | 1 |
| hsa-miR-4726 NM_015548   | DST | 1 |
| hsa-miR-4745 NM_015548   | DST | 1 |
| hsa-miR-4747 NM_015548   | DST | 1 |
| hsa-miR-371b NM_015548   | DST | 1 |
| hsa-miR-4999 NM_015548   | DST | 1 |
| hsa-miR-5011 NM_015548   | DST | 1 |
| hsa-miR-5693 NM_015548   | DST | 1 |
| hsa-miR-6126 NM_015548   | DST | 1 |
| hsa-miR-6131 NM_015548   | DST | 1 |
| hsa-miR-6134 NM_015548   | DST | 1 |
| hsa-miR-6501 NM_015548   | DST | 1 |
| hsa-miR-6717 NM_015548   | DST | 1 |
| hsa-miR-7845 NM_015548   | DST | 1 |
| hsa-miR-7973 NM_015548   | DST | 1 |
| hsa-miR-8053 NM_015548   | DST | 1 |
| hsa-miR-8085 NM_015548   | DST | 1 |
| hsa-miR-1052 NM_015548   | DST | 1 |
| hsa-miR-1212 NM_015548   | DST | 1 |
| hsa-miR-92a-; NM_0013747 | DST | 1 |
| hsa-miR-221-; NM_0013747 | DST | 1 |
| hsa-miR-130a NM_0013747  | DST | 1 |
| hsa-miR-372-; NM_0013747 | DST | 1 |
| hsa-miR-148b NM_0013747  | DST | 1 |
| hsa-miR-493-; NM_0013747 | DST | 1 |
| hsa-miR-640 NM_0013747   | DST | 1 |
| hsa-miR-1207 NM_0013747  | DST | 1 |
| hsa-miR-1208 NM_0013747  | DST | 1 |
| hsa-miR-548g NM_0013747  | DST | 1 |
| hsa-miR-3132 NM_0013747  | DST | 1 |
| hsa-miR-3166 NM_0013747  | DST | 1 |
| hsa-miR-4318 NM_0013747  | DST | 1 |
| hsa-miR-4263 NM_0013747  | DST | 1 |
| hsa-miR-3682 NM_0013747  | DST | 1 |
| hsa-miR-4669 NM_0013747  | DST | 1 |
| hsa-miR-4726 NM_0013747  | DST | 1 |
| hsa-miR-4742 NM_0013747  | DST | 1 |
| hsa-miR-4747 NM_0013747  | DST | 1 |
| hsa-miR-2467 NM_0013747  | DST | 1 |
| hsa-miR-4789 NM_0013747  | DST | 1 |
| hsa-miR-5693 NM_0013747  | DST | 1 |
| hsa-miR-6501 NM_0013747  | DST | 1 |
| hsa-miR-807C NM_0013747  | DST | 1 |
| hsa-miR-8085 NM_0013747  | DST | 1 |
| hsa-miR-1212 NM_0013747  | DST | 1 |
| hsa-miR-1212 NM_0013747  | DST | 1 |
| hsa-miR-15a-; NM_0013747 | DST | 1 |
| hsa-miR-92a-; NM_0013747 | DST | 1 |
| hsa-miR-182-; NM_0013747 | DST | 1 |
| hsa-miR-221-; NM_0013747 | DST | 1 |
| hsa-miR-130a NM_0013747  | DST | 1 |
| hsa-miR-372-; NM_0013747 | DST | 1 |
| hsa-miR-148b NM_0013747  | DST | 1 |

|                              |   |
|------------------------------|---|
| hsa-miR-493- NM_0013747 DST  | 1 |
| hsa-miR-632 NM_0013747 DST   | 1 |
| hsa-miR-640 NM_0013747 DST   | 1 |
| hsa-miR-1207 NM_0013747 DST  | 1 |
| hsa-miR-1208 NM_0013747 DST  | 1 |
| hsa-miR-548q NM_0013747 DST  | 1 |
| hsa-miR-3125 NM_0013747 DST  | 1 |
| hsa-miR-3132 NM_0013747 DST  | 1 |
| hsa-miR-3166 NM_0013747 DST  | 1 |
| hsa-miR-4318 NM_0013747 DST  | 1 |
| hsa-miR-4263 NM_0013747 DST  | 1 |
| hsa-miR-3682 NM_0013747 DST  | 1 |
| hsa-miR-4665 NM_0013747 DST  | 1 |
| hsa-miR-4726 NM_0013747 DST  | 1 |
| hsa-miR-4742 NM_0013747 DST  | 1 |
| hsa-miR-4747 NM_0013747 DST  | 1 |
| hsa-miR-2467 NM_0013747 DST  | 1 |
| hsa-miR-4785 NM_0013747 DST  | 1 |
| hsa-miR-5693 NM_0013747 DST  | 1 |
| hsa-miR-6501 NM_0013747 DST  | 1 |
| hsa-miR-807C NM_0013747 DST  | 1 |
| hsa-miR-8085 NM_0013747 DST  | 1 |
| hsa-miR-1052 NM_0013747 DST  | 1 |
| hsa-miR-1212 NM_0013747 DST  | 1 |
| hsa-miR-1212 NM_0013747 DST  | 1 |
| hsa-let-7a-2-3 NM_001723 DST | 1 |
| hsa-let-7c-3p NM_001723 DST  | 1 |
| hsa-let-7e-3p NM_001723 DST  | 1 |
| hsa-miR-103a NM_001723 DST   | 1 |
| hsa-miR-125b NM_001723 DST   | 1 |
| hsa-miR-133a NM_001723 DST   | 1 |
| hsa-miR-150-1 NM_001723 DST  | 1 |
| hsa-miR-302a NM_001723 DST   | 1 |
| hsa-miR-302a NM_001723 DST   | 1 |
| hsa-miR-299-1 NM_001723 DST  | 1 |
| hsa-miR-302c NM_001723 DST   | 1 |
| hsa-miR-483- NM_001723 DST   | 1 |
| hsa-miR-493- NM_001723 DST   | 1 |
| hsa-miR-493- NM_001723 DST   | 1 |
| hsa-miR-521 NM_001723 DST    | 1 |
| hsa-miR-521 NM_001723 DST    | 1 |
| hsa-miR-520g NM_001723 DST   | 1 |
| hsa-miR-552-1 NM_001723 DST  | 1 |
| hsa-miR-639 NM_001723 DST    | 1 |
| hsa-miR-656-1 NM_001723 DST  | 1 |
| hsa-miR-671-1 NM_001723 DST  | 1 |
| hsa-miR-1298 NM_001723 DST   | 1 |
| hsa-miR-875-1 NM_001723 DST  | 1 |
| hsa-miR-877-1 NM_001723 DST  | 1 |
| hsa-miR-543 NM_001723 DST    | 1 |
| hsa-miR-933 NM_001723 DST    | 1 |
| hsa-miR-1225 NM_001723 DST   | 1 |
| hsa-miR-1294 NM_001723 DST   | 1 |
| hsa-miR-1266 NM_001723 DST   | 1 |
| hsa-miR-1255 NM_001723 DST   | 1 |
| hsa-miR-1306 NM_001723 DST   | 1 |
| hsa-miR-1539 NM_001723 DST   | 1 |
| hsa-miR-3116 NM_001723 DST   | 1 |
| hsa-miR-3125 NM_001723 DST   | 1 |
| hsa-miR-3162 NM_001723 DST   | 1 |
| hsa-miR-3178 NM_001723 DST   | 1 |
| hsa-miR-3185 NM_001723 DST   | 1 |
| hsa-miR-3192 NM_001723 DST   | 1 |
| hsa-miR-3198 NM_001723 DST   | 1 |
| hsa-miR-3667 NM_001723 DST   | 1 |
| hsa-miR-3680 NM_001723 DST   | 1 |
| hsa-miR-3691 NM_001723 DST   | 1 |
| hsa-miR-3689 NM_001723 DST   | 1 |
| hsa-miR-3936 NM_001723 DST   | 1 |
| hsa-miR-374c NM_001723 DST   | 1 |
| hsa-miR-3689 NM_001723 DST   | 1 |
| hsa-miR-4515 NM_001723 DST   | 1 |
| hsa-miR-4646 NM_001723 DST   | 1 |
| hsa-miR-4657 NM_001723 DST   | 1 |
| hsa-miR-4664 NM_001723 DST   | 1 |
| hsa-miR-4667 NM_001723 DST   | 1 |
| hsa-miR-4695 NM_001723 DST   | 1 |
| hsa-miR-4723 NM_001723 DST   | 1 |
| hsa-miR-4747 NM_001723 DST   | 1 |
| hsa-miR-4747 NM_001723 DST   | 1 |
| hsa-miR-4785 NM_001723 DST   | 1 |
| hsa-miR-664b NM_001723 DST   | 1 |
| hsa-miR-5581 NM_001723 DST   | 1 |
| hsa-miR-5584 NM_001723 DST   | 1 |
| hsa-miR-5587 NM_001723 DST   | 1 |
| hsa-miR-5687 NM_001723 DST   | 1 |
| hsa-miR-6085 NM_001723 DST   | 1 |
| hsa-miR-6514 NM_001723 DST   | 1 |
| hsa-miR-6717 NM_001723 DST   | 1 |
| hsa-miR-892c NM_001723 DST   | 1 |
| hsa-miR-6727 NM_001723 DST   | 1 |
| hsa-miR-674C NM_001723 DST   | 1 |
| hsa-miR-6746 NM_001723 DST   | 1 |
| hsa-miR-6753 NM_001723 DST   | 1 |

|                         |      |            |
|-------------------------|------|------------|
| hsa-miR-6754 NM_001723  | DST  | 1          |
| hsa-miR-6757 NM_001723  | DST  | 1          |
| hsa-miR-6760 NM_001723  | DST  | 1          |
| hsa-miR-6796 NM_001723  | DST  | 1          |
| hsa-miR-6800 NM_001723  | DST  | 1          |
| hsa-miR-6809 NM_001723  | DST  | 1          |
| hsa-miR-6811 NM_001723  | DST  | 1          |
| hsa-miR-6817 NM_001723  | DST  | 1          |
| hsa-miR-6846 NM_001723  | DST  | 1          |
| hsa-miR-6861 NM_001723  | DST  | 1          |
| hsa-miR-6887 NM_001723  | DST  | 1          |
| hsa-miR-8052 NM_001723  | DST  | 1          |
| hsa-miR-9898 NM_001723  | DST  | 1          |
| hsa-miR-1039 NM_001723  | DST  | 1          |
| hsa-miR-3085 NM_001723  | DST  | 1          |
| hsa-miR-1211 NM_001723  | DST  | 1          |
| hsa-miR-15a- NM_0011447 | DST  | 1          |
| hsa-miR-218- NM_0011447 | DST  | 1          |
| hsa-miR-127- NM_0011447 | DST  | 1          |
| hsa-miR-640 NM_0011447  | DST  | 1          |
| hsa-miR-3186 NM_0011447 | DST  | 1          |
| hsa-miR-4318 NM_0011447 | DST  | 1          |
| hsa-miR-4266 NM_0011447 | DST  | 1          |
| hsa-miR-3671 NM_0011447 | DST  | 1          |
| hsa-miR-4458 NM_0011447 | DST  | 1          |
| hsa-miR-4522 NM_0011447 | DST  | 1          |
| hsa-miR-4669 NM_0011447 | DST  | 1          |
| hsa-miR-4726 NM_0011447 | DST  | 1          |
| hsa-miR-4745 NM_0011447 | DST  | 1          |
| hsa-miR-4747 NM_0011447 | DST  | 1          |
| hsa-miR-5693 NM_0011447 | DST  | 1          |
| hsa-miR-6501 NM_0011447 | DST  | 1          |
| hsa-miR-8070 NM_0011447 | DST  | 1          |
| hsa-miR-8085 NM_0011447 | DST  | 1          |
| hsa-miR-1052 NM_0011447 | DST  | 1          |
| hsa-miR-512- NM_002658  | PLAU | 0.96153846 |
| hsa-miR-4800 NM_002658  | PLAU | 0.96153846 |
| hsa-miR-512- NM_0011450 | PLAU | 0.96153846 |
| hsa-miR-3692 NM_0011450 | PLAU | 0.96153846 |
| hsa-miR-4800 NM_0011450 | PLAU | 0.96153846 |
| hsa-miR-1179 NM_002658  | PLAU | 0.96923077 |
| hsa-miR-1179 NM_0011450 | PLAU | 0.96923077 |
| hsa-miR-455- NM_002658  | PLAU | 0.97435897 |
| hsa-miR-1234 NM_002658  | PLAU | 0.97435897 |
| hsa-miR-3124 NM_002658  | PLAU | 0.97435897 |
| hsa-miR-6848 NM_002658  | PLAU | 0.97435897 |
| hsa-miR-6769 NM_002658  | PLAU | 0.97435897 |
| hsa-miR-6884 NM_002658  | PLAU | 0.97435897 |
| hsa-miR-4433 NM_002658  | PLAU | 0.97435897 |
| hsa-miR-455- NM_0011450 | PLAU | 0.97435897 |
| hsa-miR-1234 NM_0011450 | PLAU | 0.97435897 |
| hsa-miR-3124 NM_0011450 | PLAU | 0.97435897 |
| hsa-miR-6848 NM_0011450 | PLAU | 0.97435897 |
| hsa-miR-6884 NM_0011450 | PLAU | 0.97435897 |
| hsa-miR-4433 NM_0011450 | PLAU | 0.97435897 |
| hsa-miR-4746 NM_002658  | PLAU | 0.97435897 |
| hsa-miR-4746 NM_0011450 | PLAU | 0.97435897 |
| hsa-miR-7106 NM_002658  | PLAU | 0.98076923 |
| hsa-miR-7106 NM_0011450 | PLAU | 0.98076923 |
| hsa-miR-17-5j NM_002658 | PLAU | 1          |
| hsa-miR-19b- NM_002658  | PLAU | 1          |
| hsa-miR-24-1- NM_002658 | PLAU | 1          |
| hsa-miR-26b- NM_002658  | PLAU | 1          |
| hsa-miR-27a- NM_002658  | PLAU | 1          |
| hsa-miR-28-5j NM_002658 | PLAU | 1          |
| hsa-miR-31-5j NM_002658 | PLAU | 1          |
| hsa-miR-31-5j NM_002658 | PLAU | 1          |
| hsa-miR-93-5j NM_002658 | PLAU | 1          |
| hsa-miR-106a NM_002658  | PLAU | 1          |
| hsa-miR-192- NM_002658  | PLAU | 1          |
| hsa-miR-198 NM_002658   | PLAU | 1          |
| hsa-miR-7-1-3 NM_002658 | PLAU | 1          |
| hsa-miR-7-1-3 NM_002658 | PLAU | 1          |
| hsa-miR-187- NM_002658  | PLAU | 1          |
| hsa-miR-203a NM_002658  | PLAU | 1          |
| hsa-miR-216a NM_002658  | PLAU | 1          |
| hsa-miR-219a NM_002658  | PLAU | 1          |
| hsa-miR-27b- NM_002658  | PLAU | 1          |
| hsa-miR-27b- NM_002658  | PLAU | 1          |
| hsa-miR-125t NM_002658  | PLAU | 1          |
| hsa-miR-130a NM_002658  | PLAU | 1          |
| hsa-miR-130a NM_002658  | PLAU | 1          |
| hsa-miR-127- NM_002658  | PLAU | 1          |
| hsa-miR-149- NM_002658  | PLAU | 1          |
| hsa-miR-185- NM_002658  | PLAU | 1          |
| hsa-miR-188- NM_002658  | PLAU | 1          |
| hsa-miR-195- NM_002658  | PLAU | 1          |
| hsa-miR-206 NM_002658   | PLAU | 1          |
| hsa-miR-34c- NM_002658  | PLAU | 1          |
| hsa-miR-296- NM_002658  | PLAU | 1          |
| hsa-miR-296- NM_002658  | PLAU | 1          |
| hsa-miR-363- NM_002658  | PLAU | 1          |
| hsa-miR-370- NM_002658  | PLAU | 1          |
| hsa-miR-371a NM_002658  | PLAU | 1          |

|              |           |      |   |
|--------------|-----------|------|---|
| hsa-miR-378a | NM_002658 | PLAU | 1 |
| hsa-miR-379- | NM_002658 | PLAU | 1 |
| hsa-miR-382- | NM_002658 | PLAU | 1 |
| hsa-miR-382- | NM_002658 | PLAU | 1 |
| hsa-miR-151a | NM_002658 | PLAU | 1 |
| hsa-miR-148b | NM_002658 | PLAU | 1 |
| hsa-miR-423- | NM_002658 | PLAU | 1 |
| hsa-miR-425- | NM_002658 | PLAU | 1 |
| hsa-miR-18b- | NM_002658 | PLAU | 1 |
| hsa-miR-486- | NM_002658 | PLAU | 1 |
| hsa-miR-511- | NM_002658 | PLAU | 1 |
| hsa-miR-511- | NM_002658 | PLAU | 1 |
| hsa-miR-146b | NM_002658 | PLAU | 1 |
| hsa-miR-432- | NM_002658 | PLAU | 1 |
| hsa-miR-520a | NM_002658 | PLAU | 1 |
| hsa-miR-525- | NM_002658 | PLAU | 1 |
| hsa-miR-518f | NM_002658 | PLAU | 1 |
| hsa-miR-508- | NM_002658 | PLAU | 1 |
| hsa-miR-509- | NM_002658 | PLAU | 1 |
| hsa-miR-514a | NM_002658 | PLAU | 1 |
| hsa-miR-558  | NM_002658 | PLAU | 1 |
| hsa-miR-575  | NM_002658 | PLAU | 1 |
| hsa-miR-548b | NM_002658 | PLAU | 1 |
| hsa-miR-591  | NM_002658 | PLAU | 1 |
| hsa-miR-600  | NM_002658 | PLAU | 1 |
| hsa-miR-619- | NM_002658 | PLAU | 1 |
| hsa-miR-632  | NM_002658 | PLAU | 1 |
| hsa-miR-648  | NM_002658 | PLAU | 1 |
| hsa-miR-648  | NM_002658 | PLAU | 1 |
| hsa-miR-652- | NM_002658 | PLAU | 1 |
| hsa-miR-660- | NM_002658 | PLAU | 1 |
| hsa-miR-550a | NM_002658 | PLAU | 1 |
| hsa-miR-1224 | NM_002658 | PLAU | 1 |
| hsa-miR-766- | NM_002658 | PLAU | 1 |
| hsa-miR-378d | NM_002658 | PLAU | 1 |
| hsa-miR-670- | NM_002658 | PLAU | 1 |
| hsa-miR-675- | NM_002658 | PLAU | 1 |
| hsa-miR-298  | NM_002658 | PLAU | 1 |
| hsa-miR-450b | NM_002658 | PLAU | 1 |
| hsa-miR-892b | NM_002658 | PLAU | 1 |
| hsa-miR-875- | NM_002658 | PLAU | 1 |
| hsa-miR-708- | NM_002658 | PLAU | 1 |
| hsa-miR-887- | NM_002658 | PLAU | 1 |
| hsa-miR-543  | NM_002658 | PLAU | 1 |
| hsa-miR-543  | NM_002658 | PLAU | 1 |
| hsa-miR-301b | NM_002658 | PLAU | 1 |
| hsa-miR-216b | NM_002658 | PLAU | 1 |
| hsa-miR-921  | NM_002658 | PLAU | 1 |
| hsa-miR-933  | NM_002658 | PLAU | 1 |
| hsa-miR-939- | NM_002658 | PLAU | 1 |
| hsa-miR-942- | NM_002658 | PLAU | 1 |
| hsa-miR-1181 | NM_002658 | PLAU | 1 |
| hsa-miR-1225 | NM_002658 | PLAU | 1 |
| hsa-miR-1231 | NM_002658 | PLAU | 1 |
| hsa-miR-1287 | NM_002658 | PLAU | 1 |
| hsa-miR-1295 | NM_002658 | PLAU | 1 |
| hsa-miR-1295 | NM_002658 | PLAU | 1 |
| hsa-miR-1303 | NM_002658 | PLAU | 1 |
| hsa-miR-1245 | NM_002658 | PLAU | 1 |
| hsa-miR-125c | NM_002658 | PLAU | 1 |
| hsa-miR-1265 | NM_002658 | PLAU | 1 |
| hsa-miR-1276 | NM_002658 | PLAU | 1 |
| hsa-miR-1276 | NM_002658 | PLAU | 1 |
| hsa-miR-664a | NM_002658 | PLAU | 1 |
| hsa-miR-513b | NM_002658 | PLAU | 1 |
| hsa-miR-1321 | NM_002658 | PLAU | 1 |
| hsa-miR-147c | NM_002658 | PLAU | 1 |
| hsa-miR-1905 | NM_002658 | PLAU | 1 |
| hsa-miR-191c | NM_002658 | PLAU | 1 |
| hsa-miR-2277 | NM_002658 | PLAU | 1 |
| hsa-miR-2682 | NM_002658 | PLAU | 1 |
| hsa-miR-3127 | NM_002658 | PLAU | 1 |
| hsa-miR-313c | NM_002658 | PLAU | 1 |
| hsa-miR-315c | NM_002658 | PLAU | 1 |
| hsa-miR-3162 | NM_002658 | PLAU | 1 |
| hsa-miR-3162 | NM_002658 | PLAU | 1 |
| hsa-miR-3173 | NM_002658 | PLAU | 1 |
| hsa-miR-3191 | NM_002658 | PLAU | 1 |
| hsa-miR-320c | NM_002658 | PLAU | 1 |
| hsa-miR-430c | NM_002658 | PLAU | 1 |
| hsa-miR-4255 | NM_002658 | PLAU | 1 |
| hsa-miR-4326 | NM_002658 | PLAU | 1 |
| hsa-miR-4265 | NM_002658 | PLAU | 1 |
| hsa-miR-427c | NM_002658 | PLAU | 1 |
| hsa-miR-433c | NM_002658 | PLAU | 1 |
| hsa-miR-500b | NM_002658 | PLAU | 1 |
| hsa-miR-3615 | NM_002658 | PLAU | 1 |
| hsa-miR-3615 | NM_002658 | PLAU | 1 |
| hsa-miR-3664 | NM_002658 | PLAU | 1 |
| hsa-miR-3675 | NM_002658 | PLAU | 1 |
| hsa-miR-3678 | NM_002658 | PLAU | 1 |
| hsa-miR-368c | NM_002658 | PLAU | 1 |
| hsa-miR-3692 | NM_002658 | PLAU | 1 |
| hsa-miR-676- | NM_002658 | PLAU | 1 |
| hsa-miR-3934 | NM_002658 | PLAU | 1 |

|              |           |      |   |
|--------------|-----------|------|---|
| hsa-miR-3943 | NM_002658 | PLAU | 1 |
| hsa-miR-550b | NM_002658 | PLAU | 1 |
| hsa-miR-4421 | NM_002658 | PLAU | 1 |
| hsa-miR-4423 | NM_002658 | PLAU | 1 |
| hsa-miR-4425 | NM_002658 | PLAU | 1 |
| hsa-miR-4429 | NM_002658 | PLAU | 1 |
| hsa-miR-4433 | NM_002658 | PLAU | 1 |
| hsa-miR-4474 | NM_002658 | PLAU | 1 |
| hsa-miR-4475 | NM_002658 | PLAU | 1 |
| hsa-miR-4482 | NM_002658 | PLAU | 1 |
| hsa-miR-4482 | NM_002658 | PLAU | 1 |
| hsa-miR-4484 | NM_002658 | PLAU | 1 |
| hsa-miR-4487 | NM_002658 | PLAU | 1 |
| hsa-miR-4489 | NM_002658 | PLAU | 1 |
| hsa-miR-4499 | NM_002658 | PLAU | 1 |
| hsa-miR-4499 | NM_002658 | PLAU | 1 |
| hsa-miR-4506 | NM_002658 | PLAU | 1 |
| hsa-miR-4511 | NM_002658 | PLAU | 1 |
| hsa-miR-4520 | NM_002658 | PLAU | 1 |
| hsa-miR-4522 | NM_002658 | PLAU | 1 |
| hsa-miR-4522 | NM_002658 | PLAU | 1 |
| hsa-miR-4523 | NM_002658 | PLAU | 1 |
| hsa-miR-4524 | NM_002658 | PLAU | 1 |
| hsa-miR-4529 | NM_002658 | PLAU | 1 |
| hsa-miR-4530 | NM_002658 | PLAU | 1 |
| hsa-miR-4538 | NM_002658 | PLAU | 1 |
| hsa-miR-4540 | NM_002658 | PLAU | 1 |
| hsa-miR-4540 | NM_002658 | PLAU | 1 |
| hsa-miR-4639 | NM_002658 | PLAU | 1 |
| hsa-miR-4645 | NM_002658 | PLAU | 1 |
| hsa-miR-4652 | NM_002658 | PLAU | 1 |
| hsa-miR-4654 | NM_002658 | PLAU | 1 |
| hsa-miR-4657 | NM_002658 | PLAU | 1 |
| hsa-miR-4665 | NM_002658 | PLAU | 1 |
| hsa-miR-219b | NM_002658 | PLAU | 1 |
| hsa-miR-4680 | NM_002658 | PLAU | 1 |
| hsa-miR-4685 | NM_002658 | PLAU | 1 |
| hsa-miR-4687 | NM_002658 | PLAU | 1 |
| hsa-miR-1343 | NM_002658 | PLAU | 1 |
| hsa-miR-4692 | NM_002658 | PLAU | 1 |
| hsa-miR-4695 | NM_002658 | PLAU | 1 |
| hsa-miR-4699 | NM_002658 | PLAU | 1 |
| hsa-miR-4700 | NM_002658 | PLAU | 1 |
| hsa-miR-4711 | NM_002658 | PLAU | 1 |
| hsa-miR-4712 | NM_002658 | PLAU | 1 |
| hsa-miR-4723 | NM_002658 | PLAU | 1 |
| hsa-miR-4727 | NM_002658 | PLAU | 1 |
| hsa-miR-4742 | NM_002658 | PLAU | 1 |
| hsa-miR-4743 | NM_002658 | PLAU | 1 |
| hsa-miR-4745 | NM_002658 | PLAU | 1 |
| hsa-miR-4746 | NM_002658 | PLAU | 1 |
| hsa-miR-4748 | NM_002658 | PLAU | 1 |
| hsa-miR-4750 | NM_002658 | PLAU | 1 |
| hsa-miR-4757 | NM_002658 | PLAU | 1 |
| hsa-miR-4768 | NM_002658 | PLAU | 1 |
| hsa-miR-4768 | NM_002658 | PLAU | 1 |
| hsa-miR-4776 | NM_002658 | PLAU | 1 |
| hsa-miR-4799 | NM_002658 | PLAU | 1 |
| hsa-miR-4804 | NM_002658 | PLAU | 1 |
| hsa-miR-4999 | NM_002658 | PLAU | 1 |
| hsa-miR-5004 | NM_002658 | PLAU | 1 |
| hsa-miR-5194 | NM_002658 | PLAU | 1 |
| hsa-miR-4524 | NM_002658 | PLAU | 1 |
| hsa-miR-664b | NM_002658 | PLAU | 1 |
| hsa-miR-664b | NM_002658 | PLAU | 1 |
| hsa-miR-5587 | NM_002658 | PLAU | 1 |
| hsa-miR-5591 | NM_002658 | PLAU | 1 |
| hsa-miR-5681 | NM_002658 | PLAU | 1 |
| hsa-miR-5699 | NM_002658 | PLAU | 1 |
| hsa-miR-1199 | NM_002658 | PLAU | 1 |
| hsa-miR-6124 | NM_002658 | PLAU | 1 |
| hsa-miR-6499 | NM_002658 | PLAU | 1 |
| hsa-miR-6502 | NM_002658 | PLAU | 1 |
| hsa-miR-6504 | NM_002658 | PLAU | 1 |
| hsa-miR-6513 | NM_002658 | PLAU | 1 |
| hsa-miR-6514 | NM_002658 | PLAU | 1 |
| hsa-miR-6715 | NM_002658 | PLAU | 1 |
| hsa-miR-6721 | NM_002658 | PLAU | 1 |
| hsa-miR-6722 | NM_002658 | PLAU | 1 |
| hsa-miR-6726 | NM_002658 | PLAU | 1 |
| hsa-miR-6728 | NM_002658 | PLAU | 1 |
| hsa-miR-6734 | NM_002658 | PLAU | 1 |
| hsa-miR-6737 | NM_002658 | PLAU | 1 |
| hsa-miR-6739 | NM_002658 | PLAU | 1 |
| hsa-miR-6743 | NM_002658 | PLAU | 1 |
| hsa-miR-6747 | NM_002658 | PLAU | 1 |
| hsa-miR-6751 | NM_002658 | PLAU | 1 |
| hsa-miR-6757 | NM_002658 | PLAU | 1 |
| hsa-miR-6757 | NM_002658 | PLAU | 1 |
| hsa-miR-6759 | NM_002658 | PLAU | 1 |
| hsa-miR-6759 | NM_002658 | PLAU | 1 |
| hsa-miR-6762 | NM_002658 | PLAU | 1 |
| hsa-miR-6769 | NM_002658 | PLAU | 1 |
| hsa-miR-6774 | NM_002658 | PLAU | 1 |
| hsa-miR-6775 | NM_002658 | PLAU | 1 |



|               |            |      |   |
|---------------|------------|------|---|
| hsa-miR-6775  | NM_002658  | PLAU | 1 |
| hsa-miR-6781  | NM_002658  | PLAU | 1 |
| hsa-miR-6782  | NM_002658  | PLAU | 1 |
| hsa-miR-6786  | NM_002658  | PLAU | 1 |
| hsa-miR-6787  | NM_002658  | PLAU | 1 |
| hsa-miR-6790  | NM_002658  | PLAU | 1 |
| hsa-miR-6792  | NM_002658  | PLAU | 1 |
| hsa-miR-6796  | NM_002658  | PLAU | 1 |
| hsa-miR-6796  | NM_002658  | PLAU | 1 |
| hsa-miR-6796  | NM_002658  | PLAU | 1 |
| hsa-miR-6797  | NM_002658  | PLAU | 1 |
| hsa-miR-6798  | NM_002658  | PLAU | 1 |
| hsa-miR-6800  | NM_002658  | PLAU | 1 |
| hsa-miR-6802  | NM_002658  | PLAU | 1 |
| hsa-miR-6802  | NM_002658  | PLAU | 1 |
| hsa-miR-6803  | NM_002658  | PLAU | 1 |
| hsa-miR-6810  | NM_002658  | PLAU | 1 |
| hsa-miR-6813  | NM_002658  | PLAU | 1 |
| hsa-miR-6814  | NM_002658  | PLAU | 1 |
| hsa-miR-6818  | NM_002658  | PLAU | 1 |
| hsa-miR-6820  | NM_002658  | PLAU | 1 |
| hsa-miR-6827  | NM_002658  | PLAU | 1 |
| hsa-miR-6828  | NM_002658  | PLAU | 1 |
| hsa-miR-6837  | NM_002658  | PLAU | 1 |
| hsa-miR-6838  | NM_002658  | PLAU | 1 |
| hsa-miR-6839  | NM_002658  | PLAU | 1 |
| hsa-miR-6840  | NM_002658  | PLAU | 1 |
| hsa-miR-6841  | NM_002658  | PLAU | 1 |
| hsa-miR-6842  | NM_002658  | PLAU | 1 |
| hsa-miR-6852  | NM_002658  | PLAU | 1 |
| hsa-miR-6856  | NM_002658  | PLAU | 1 |
| hsa-miR-6858  | NM_002658  | PLAU | 1 |
| hsa-miR-6769  | NM_002658  | PLAU | 1 |
| hsa-miR-6871  | NM_002658  | PLAU | 1 |
| hsa-miR-6875  | NM_002658  | PLAU | 1 |
| hsa-miR-6876  | NM_002658  | PLAU | 1 |
| hsa-miR-6877  | NM_002658  | PLAU | 1 |
| hsa-miR-6882  | NM_002658  | PLAU | 1 |
| hsa-miR-6884  | NM_002658  | PLAU | 1 |
| hsa-miR-6884  | NM_002658  | PLAU | 1 |
| hsa-miR-6885  | NM_002658  | PLAU | 1 |
| hsa-miR-6888  | NM_002658  | PLAU | 1 |
| hsa-miR-6893  | NM_002658  | PLAU | 1 |
| hsa-miR-6895  | NM_002658  | PLAU | 1 |
| hsa-miR-7107  | NM_002658  | PLAU | 1 |
| hsa-miR-7110  | NM_002658  | PLAU | 1 |
| hsa-miR-7154  | NM_002658  | PLAU | 1 |
| hsa-miR-7161  | NM_002658  | PLAU | 1 |
| hsa-miR-4433  | NM_002658  | PLAU | 1 |
| hsa-miR-7848  | NM_002658  | PLAU | 1 |
| hsa-miR-7851  | NM_002658  | PLAU | 1 |
| hsa-miR-7974  | NM_002658  | PLAU | 1 |
| hsa-miR-7976  | NM_002658  | PLAU | 1 |
| hsa-miR-8078  | NM_002658  | PLAU | 1 |
| hsa-miR-9899  | NM_002658  | PLAU | 1 |
| hsa-miR-9900  | NM_002658  | PLAU | 1 |
| hsa-miR-9985  | NM_002658  | PLAU | 1 |
| hsa-miR-1843  | NM_002658  | PLAU | 1 |
| hsa-miR-1039  | NM_002658  | PLAU | 1 |
| hsa-miR-1052  | NM_002658  | PLAU | 1 |
| hsa-miR-9851  | NM_002658  | PLAU | 1 |
| hsa-miR-9851  | NM_002658  | PLAU | 1 |
| hsa-miR-1211  | NM_002658  | PLAU | 1 |
| hsa-miR-1212  | NM_002658  | PLAU | 1 |
| hsa-miR-17-5j | NM_0011450 | PLAU | 1 |
| hsa-miR-19b-  | NM_0011450 | PLAU | 1 |
| hsa-miR-24-1- | NM_0011450 | PLAU | 1 |
| hsa-miR-26b-  | NM_0011450 | PLAU | 1 |
| hsa-miR-27a-  | NM_0011450 | PLAU | 1 |
| hsa-miR-28-5j | NM_0011450 | PLAU | 1 |
| hsa-miR-31-5j | NM_0011450 | PLAU | 1 |
| hsa-miR-31-5j | NM_0011450 | PLAU | 1 |
| hsa-miR-93-5j | NM_0011450 | PLAU | 1 |
| hsa-miR-106a  | NM_0011450 | PLAU | 1 |
| hsa-miR-192-  | NM_0011450 | PLAU | 1 |
| hsa-miR-198   | NM_0011450 | PLAU | 1 |
| hsa-miR-7-1-3 | NM_0011450 | PLAU | 1 |
| hsa-miR-7-1-3 | NM_0011450 | PLAU | 1 |
| hsa-miR-203a  | NM_0011450 | PLAU | 1 |
| hsa-miR-216a  | NM_0011450 | PLAU | 1 |
| hsa-miR-219a  | NM_0011450 | PLAU | 1 |
| hsa-miR-27b-  | NM_0011450 | PLAU | 1 |
| hsa-miR-27b-  | NM_0011450 | PLAU | 1 |
| hsa-miR-125b  | NM_0011450 | PLAU | 1 |
| hsa-miR-130a  | NM_0011450 | PLAU | 1 |
| hsa-miR-130a  | NM_0011450 | PLAU | 1 |
| hsa-miR-127-  | NM_0011450 | PLAU | 1 |
| hsa-miR-185-  | NM_0011450 | PLAU | 1 |
| hsa-miR-188-  | NM_0011450 | PLAU | 1 |
| hsa-miR-195-  | NM_0011450 | PLAU | 1 |
| hsa-miR-206   | NM_0011450 | PLAU | 1 |
| hsa-miR-34c-  | NM_0011450 | PLAU | 1 |
| hsa-miR-296-  | NM_0011450 | PLAU | 1 |
| hsa-miR-296-  | NM_0011450 | PLAU | 1 |

|              |            |      |   |
|--------------|------------|------|---|
| hsa-miR-363- | NM_0011450 | PLAU | 1 |
| hsa-miR-378a | NM_0011450 | PLAU | 1 |
| hsa-miR-379- | NM_0011450 | PLAU | 1 |
| hsa-miR-381- | NM_0011450 | PLAU | 1 |
| hsa-miR-382- | NM_0011450 | PLAU | 1 |
| hsa-miR-382- | NM_0011450 | PLAU | 1 |
| hsa-miR-151a | NM_0011450 | PLAU | 1 |
| hsa-miR-148b | NM_0011450 | PLAU | 1 |
| hsa-miR-423- | NM_0011450 | PLAU | 1 |
| hsa-miR-425- | NM_0011450 | PLAU | 1 |
| hsa-miR-18b- | NM_0011450 | PLAU | 1 |
| hsa-miR-486- | NM_0011450 | PLAU | 1 |
| hsa-miR-511- | NM_0011450 | PLAU | 1 |
| hsa-miR-511- | NM_0011450 | PLAU | 1 |
| hsa-miR-432- | NM_0011450 | PLAU | 1 |
| hsa-miR-520a | NM_0011450 | PLAU | 1 |
| hsa-miR-525- | NM_0011450 | PLAU | 1 |
| hsa-miR-518f | NM_0011450 | PLAU | 1 |
| hsa-miR-508- | NM_0011450 | PLAU | 1 |
| hsa-miR-509- | NM_0011450 | PLAU | 1 |
| hsa-miR-514a | NM_0011450 | PLAU | 1 |
| hsa-miR-558  | NM_0011450 | PLAU | 1 |
| hsa-miR-575  | NM_0011450 | PLAU | 1 |
| hsa-miR-548b | NM_0011450 | PLAU | 1 |
| hsa-miR-591  | NM_0011450 | PLAU | 1 |
| hsa-miR-600  | NM_0011450 | PLAU | 1 |
| hsa-miR-619- | NM_0011450 | PLAU | 1 |
| hsa-miR-648  | NM_0011450 | PLAU | 1 |
| hsa-miR-652- | NM_0011450 | PLAU | 1 |
| hsa-miR-660- | NM_0011450 | PLAU | 1 |
| hsa-miR-550a | NM_0011450 | PLAU | 1 |
| hsa-miR-1224 | NM_0011450 | PLAU | 1 |
| hsa-miR-378d | NM_0011450 | PLAU | 1 |
| hsa-miR-670- | NM_0011450 | PLAU | 1 |
| hsa-miR-675- | NM_0011450 | PLAU | 1 |
| hsa-miR-298  | NM_0011450 | PLAU | 1 |
| hsa-miR-450b | NM_0011450 | PLAU | 1 |
| hsa-miR-892b | NM_0011450 | PLAU | 1 |
| hsa-miR-875- | NM_0011450 | PLAU | 1 |
| hsa-miR-708- | NM_0011450 | PLAU | 1 |
| hsa-miR-887- | NM_0011450 | PLAU | 1 |
| hsa-miR-543  | NM_0011450 | PLAU | 1 |
| hsa-miR-543  | NM_0011450 | PLAU | 1 |
| hsa-miR-301b | NM_0011450 | PLAU | 1 |
| hsa-miR-216b | NM_0011450 | PLAU | 1 |
| hsa-miR-921  | NM_0011450 | PLAU | 1 |
| hsa-miR-933  | NM_0011450 | PLAU | 1 |
| hsa-miR-939- | NM_0011450 | PLAU | 1 |
| hsa-miR-939- | NM_0011450 | PLAU | 1 |
| hsa-miR-942- | NM_0011450 | PLAU | 1 |
| hsa-miR-1181 | NM_0011450 | PLAU | 1 |
| hsa-miR-1229 | NM_0011450 | PLAU | 1 |
| hsa-miR-1231 | NM_0011450 | PLAU | 1 |
| hsa-miR-1287 | NM_0011450 | PLAU | 1 |
| hsa-miR-1299 | NM_0011450 | PLAU | 1 |
| hsa-miR-1303 | NM_0011450 | PLAU | 1 |
| hsa-miR-1249 | NM_0011450 | PLAU | 1 |
| hsa-miR-1250 | NM_0011450 | PLAU | 1 |
| hsa-miR-1269 | NM_0011450 | PLAU | 1 |
| hsa-miR-1276 | NM_0011450 | PLAU | 1 |
| hsa-miR-1276 | NM_0011450 | PLAU | 1 |
| hsa-miR-664a | NM_0011450 | PLAU | 1 |
| hsa-miR-513b | NM_0011450 | PLAU | 1 |
| hsa-miR-1321 | NM_0011450 | PLAU | 1 |
| hsa-miR-1470 | NM_0011450 | PLAU | 1 |
| hsa-miR-1909 | NM_0011450 | PLAU | 1 |
| hsa-miR-2277 | NM_0011450 | PLAU | 1 |
| hsa-miR-2682 | NM_0011450 | PLAU | 1 |
| hsa-miR-3127 | NM_0011450 | PLAU | 1 |
| hsa-miR-3130 | NM_0011450 | PLAU | 1 |
| hsa-miR-3150 | NM_0011450 | PLAU | 1 |
| hsa-miR-3173 | NM_0011450 | PLAU | 1 |
| hsa-miR-3191 | NM_0011450 | PLAU | 1 |
| hsa-miR-3200 | NM_0011450 | PLAU | 1 |
| hsa-miR-4300 | NM_0011450 | PLAU | 1 |
| hsa-miR-4259 | NM_0011450 | PLAU | 1 |
| hsa-miR-4326 | NM_0011450 | PLAU | 1 |
| hsa-miR-4265 | NM_0011450 | PLAU | 1 |
| hsa-miR-4270 | NM_0011450 | PLAU | 1 |
| hsa-miR-4330 | NM_0011450 | PLAU | 1 |
| hsa-miR-500b | NM_0011450 | PLAU | 1 |
| hsa-miR-3615 | NM_0011450 | PLAU | 1 |
| hsa-miR-3619 | NM_0011450 | PLAU | 1 |
| hsa-miR-3664 | NM_0011450 | PLAU | 1 |
| hsa-miR-3675 | NM_0011450 | PLAU | 1 |
| hsa-miR-3678 | NM_0011450 | PLAU | 1 |
| hsa-miR-3680 | NM_0011450 | PLAU | 1 |
| hsa-miR-3692 | NM_0011450 | PLAU | 1 |
| hsa-miR-676- | NM_0011450 | PLAU | 1 |
| hsa-miR-3934 | NM_0011450 | PLAU | 1 |
| hsa-miR-3943 | NM_0011450 | PLAU | 1 |
| hsa-miR-550b | NM_0011450 | PLAU | 1 |
| hsa-miR-4425 | NM_0011450 | PLAU | 1 |
| hsa-miR-4429 | NM_0011450 | PLAU | 1 |

|                              |   |
|------------------------------|---|
| hsa-miR-4433 NM_0011450 PLAU | 1 |
| hsa-miR-4474 NM_0011450 PLAU | 1 |
| hsa-miR-4475 NM_0011450 PLAU | 1 |
| hsa-miR-4482 NM_0011450 PLAU | 1 |
| hsa-miR-4482 NM_0011450 PLAU | 1 |
| hsa-miR-4484 NM_0011450 PLAU | 1 |
| hsa-miR-4485 NM_0011450 PLAU | 1 |
| hsa-miR-4499 NM_0011450 PLAU | 1 |
| hsa-miR-4506 NM_0011450 PLAU | 1 |
| hsa-miR-4511 NM_0011450 PLAU | 1 |
| hsa-miR-4520 NM_0011450 PLAU | 1 |
| hsa-miR-4522 NM_0011450 PLAU | 1 |
| hsa-miR-4523 NM_0011450 PLAU | 1 |
| hsa-miR-4524 NM_0011450 PLAU | 1 |
| hsa-miR-4525 NM_0011450 PLAU | 1 |
| hsa-miR-4538 NM_0011450 PLAU | 1 |
| hsa-miR-4540 NM_0011450 PLAU | 1 |
| hsa-miR-4540 NM_0011450 PLAU | 1 |
| hsa-miR-4540 NM_0011450 PLAU | 1 |
| hsa-miR-4639 NM_0011450 PLAU | 1 |
| hsa-miR-4645 NM_0011450 PLAU | 1 |
| hsa-miR-4652 NM_0011450 PLAU | 1 |
| hsa-miR-4654 NM_0011450 PLAU | 1 |
| hsa-miR-4657 NM_0011450 PLAU | 1 |
| hsa-miR-4665 NM_0011450 PLAU | 1 |
| hsa-miR-4680 NM_0011450 PLAU | 1 |
| hsa-miR-4685 NM_0011450 PLAU | 1 |
| hsa-miR-4687 NM_0011450 PLAU | 1 |
| hsa-miR-4692 NM_0011450 PLAU | 1 |
| hsa-miR-4695 NM_0011450 PLAU | 1 |
| hsa-miR-4700 NM_0011450 PLAU | 1 |
| hsa-miR-4711 NM_0011450 PLAU | 1 |
| hsa-miR-4712 NM_0011450 PLAU | 1 |
| hsa-miR-4723 NM_0011450 PLAU | 1 |
| hsa-miR-4727 NM_0011450 PLAU | 1 |
| hsa-miR-4742 NM_0011450 PLAU | 1 |
| hsa-miR-4743 NM_0011450 PLAU | 1 |
| hsa-miR-4745 NM_0011450 PLAU | 1 |
| hsa-miR-4746 NM_0011450 PLAU | 1 |
| hsa-miR-4748 NM_0011450 PLAU | 1 |
| hsa-miR-4750 NM_0011450 PLAU | 1 |
| hsa-miR-4757 NM_0011450 PLAU | 1 |
| hsa-miR-4768 NM_0011450 PLAU | 1 |
| hsa-miR-4768 NM_0011450 PLAU | 1 |
| hsa-miR-4795 NM_0011450 PLAU | 1 |
| hsa-miR-4804 NM_0011450 PLAU | 1 |
| hsa-miR-4995 NM_0011450 PLAU | 1 |
| hsa-miR-5004 NM_0011450 PLAU | 1 |
| hsa-miR-5194 NM_0011450 PLAU | 1 |
| hsa-miR-4524 NM_0011450 PLAU | 1 |
| hsa-miR-664b NM_0011450 PLAU | 1 |
| hsa-miR-664b NM_0011450 PLAU | 1 |
| hsa-miR-5587 NM_0011450 PLAU | 1 |
| hsa-miR-5591 NM_0011450 PLAU | 1 |
| hsa-miR-5681 NM_0011450 PLAU | 1 |
| hsa-miR-5695 NM_0011450 PLAU | 1 |
| hsa-miR-1195 NM_0011450 PLAU | 1 |
| hsa-miR-6124 NM_0011450 PLAU | 1 |
| hsa-miR-6495 NM_0011450 PLAU | 1 |
| hsa-miR-6502 NM_0011450 PLAU | 1 |
| hsa-miR-6504 NM_0011450 PLAU | 1 |
| hsa-miR-6513 NM_0011450 PLAU | 1 |
| hsa-miR-6514 NM_0011450 PLAU | 1 |
| hsa-miR-6715 NM_0011450 PLAU | 1 |
| hsa-miR-6722 NM_0011450 PLAU | 1 |
| hsa-miR-6726 NM_0011450 PLAU | 1 |
| hsa-miR-6728 NM_0011450 PLAU | 1 |
| hsa-miR-6734 NM_0011450 PLAU | 1 |
| hsa-miR-6737 NM_0011450 PLAU | 1 |
| hsa-miR-6739 NM_0011450 PLAU | 1 |
| hsa-miR-6747 NM_0011450 PLAU | 1 |
| hsa-miR-6751 NM_0011450 PLAU | 1 |
| hsa-miR-6757 NM_0011450 PLAU | 1 |
| hsa-miR-6757 NM_0011450 PLAU | 1 |
| hsa-miR-6759 NM_0011450 PLAU | 1 |
| hsa-miR-6762 NM_0011450 PLAU | 1 |
| hsa-miR-6765 NM_0011450 PLAU | 1 |
| hsa-miR-6774 NM_0011450 PLAU | 1 |
| hsa-miR-6775 NM_0011450 PLAU | 1 |
| hsa-miR-6775 NM_0011450 PLAU | 1 |
| hsa-miR-6781 NM_0011450 PLAU | 1 |
| hsa-miR-6782 NM_0011450 PLAU | 1 |
| hsa-miR-6786 NM_0011450 PLAU | 1 |
| hsa-miR-6792 NM_0011450 PLAU | 1 |
| hsa-miR-6796 NM_0011450 PLAU | 1 |
| hsa-miR-6796 NM_0011450 PLAU | 1 |
| hsa-miR-6796 NM_0011450 PLAU | 1 |
| hsa-miR-6797 NM_0011450 PLAU | 1 |
| hsa-miR-6798 NM_0011450 PLAU | 1 |
| hsa-miR-6800 NM_0011450 PLAU | 1 |
| hsa-miR-6802 NM_0011450 PLAU | 1 |
| hsa-miR-6802 NM_0011450 PLAU | 1 |
| hsa-miR-6810 NM_0011450 PLAU | 1 |
| hsa-miR-6813 NM_0011450 PLAU | 1 |
| hsa-miR-6814 NM_0011450 PLAU | 1 |

|                               |            |
|-------------------------------|------------|
| hsa-miR-6818 NM_0011450 PLAU  | 1          |
| hsa-miR-6827 NM_0011450 PLAU  | 1          |
| hsa-miR-6828 NM_0011450 PLAU  | 1          |
| hsa-miR-6837 NM_0011450 PLAU  | 1          |
| hsa-miR-6838 NM_0011450 PLAU  | 1          |
| hsa-miR-6839 NM_0011450 PLAU  | 1          |
| hsa-miR-6840 NM_0011450 PLAU  | 1          |
| hsa-miR-6841 NM_0011450 PLAU  | 1          |
| hsa-miR-6852 NM_0011450 PLAU  | 1          |
| hsa-miR-6856 NM_0011450 PLAU  | 1          |
| hsa-miR-6769 NM_0011450 PLAU  | 1          |
| hsa-miR-6871 NM_0011450 PLAU  | 1          |
| hsa-miR-6875 NM_0011450 PLAU  | 1          |
| hsa-miR-6876 NM_0011450 PLAU  | 1          |
| hsa-miR-6884 NM_0011450 PLAU  | 1          |
| hsa-miR-6885 NM_0011450 PLAU  | 1          |
| hsa-miR-6888 NM_0011450 PLAU  | 1          |
| hsa-miR-6893 NM_0011450 PLAU  | 1          |
| hsa-miR-7107 NM_0011450 PLAU  | 1          |
| hsa-miR-7110 NM_0011450 PLAU  | 1          |
| hsa-miR-7154 NM_0011450 PLAU  | 1          |
| hsa-miR-7161 NM_0011450 PLAU  | 1          |
| hsa-miR-4433 NM_0011450 PLAU  | 1          |
| hsa-miR-7851 NM_0011450 PLAU  | 1          |
| hsa-miR-7976 NM_0011450 PLAU  | 1          |
| hsa-miR-8078 NM_0011450 PLAU  | 1          |
| hsa-miR-9899 NM_0011450 PLAU  | 1          |
| hsa-miR-9900 NM_0011450 PLAU  | 1          |
| hsa-miR-9985 NM_0011450 PLAU  | 1          |
| hsa-miR-1843 NM_0011450 PLAU  | 1          |
| hsa-miR-1039 NM_0011450 PLAU  | 1          |
| hsa-miR-1052 NM_0011450 PLAU  | 1          |
| hsa-miR-9851 NM_0011450 PLAU  | 1          |
| hsa-miR-9851 NM_0011450 PLAU  | 1          |
| hsa-miR-1211 NM_0011450 PLAU  | 1          |
| hsa-miR-1212 NM_0011450 PLAU  | 1          |
| hsa-miR-6825 NM_006017 PROM1  | 0.95384615 |
| hsa-miR-3178 NM_0013714 PROM1 | 0.95384615 |
| hsa-miR-6825 NM_0013714 PROM1 | 0.95384615 |
| hsa-miR-3178 NM_0011458 PROM1 | 0.95384615 |
| hsa-miR-6825 NM_0011458 PROM1 | 0.95384615 |
| hsa-miR-3178 NM_0011458 PROM1 | 0.95384615 |
| hsa-miR-6165 NM_0011458 PROM1 | 0.95384615 |
| hsa-miR-3178 NM_0011458 PROM1 | 0.95384615 |
| hsa-miR-6825 NM_0011458 PROM1 | 0.95384615 |
| hsa-miR-3178 NM_0011458 PROM1 | 0.95384615 |
| hsa-miR-1299 XM_0115138 PROM1 | 0.96153846 |
| hsa-miR-6500 XM_0115138 PROM1 | 0.96153846 |
| hsa-miR-1040 XM_0115138 PROM1 | 0.96153846 |
| hsa-miR-1299 NM_006017 PROM1  | 0.96153846 |
| hsa-miR-3682 NM_006017 PROM1  | 0.96153846 |
| hsa-miR-4786 NM_006017 PROM1  | 0.96153846 |
| hsa-miR-4800 NM_006017 PROM1  | 0.96153846 |
| hsa-miR-6500 NM_006017 PROM1  | 0.96153846 |
| hsa-miR-1040 NM_006017 PROM1  | 0.96153846 |
| hsa-miR-1299 NM_0013714 PROM1 | 0.96153846 |
| hsa-miR-1040 NM_0013714 PROM1 | 0.96153846 |
| hsa-miR-3202 NM_0011458 PROM1 | 0.96153846 |
| hsa-miR-3682 NM_0011458 PROM1 | 0.96153846 |
| hsa-miR-1040 NM_0011458 PROM1 | 0.96153846 |
| hsa-miR-1299 NM_0011458 PROM1 | 0.96153846 |
| hsa-miR-3202 NM_0011458 PROM1 | 0.96153846 |
| hsa-miR-3682 NM_0011458 PROM1 | 0.96153846 |
| hsa-miR-4786 NM_0011458 PROM1 | 0.96153846 |
| hsa-miR-4800 NM_0011458 PROM1 | 0.96153846 |
| hsa-miR-1040 NM_0011458 PROM1 | 0.96153846 |
| hsa-miR-6500 NM_0011458 PROM1 | 0.96153846 |
| hsa-miR-1040 NM_0011458 PROM1 | 0.96153846 |
| hsa-miR-3202 NM_0011458 PROM1 | 0.96153846 |
| hsa-miR-1040 NM_0011458 PROM1 | 0.96153846 |
| hsa-miR-6500 NM_0011458 PROM1 | 0.96153846 |
| hsa-miR-1040 NM_0011458 PROM1 | 0.96153846 |
| hsa-miR-609 NM_006017 PROM1   | 0.96923077 |
| hsa-miR-609 NM_0013714 PROM1  | 0.96923077 |
| hsa-miR-663t NM_0013714 PROM1 | 0.96923077 |
| hsa-miR-609 NM_0011458 PROM1  | 0.96923077 |
| hsa-miR-609 NM_0011458 PROM1  | 0.96923077 |
| hsa-miR-609 NM_0011458 PROM1  | 0.96923077 |
| hsa-miR-609 NM_0011458 PROM1  | 0.96923077 |
| hsa-miR-609 NM_0011458 PROM1  | 0.96923077 |
| hsa-miR-609 NM_0011458 PROM1  | 0.96923077 |
| hsa-miR-640 XM_0115138 PROM1  | 0.97435897 |
| hsa-miR-4534 NM_006017 PROM1  | 0.97435897 |
| hsa-miR-4748 NM_006017 PROM1  | 0.97435897 |
| hsa-miR-3176 NM_0013714 PROM1 | 0.97435897 |
| hsa-miR-6799 NM_0013714 PROM1 | 0.97435897 |
| hsa-miR-4748 NM_0011458 PROM1 | 0.97435897 |
| hsa-miR-5100 NM_0011458 PROM1 | 0.97435897 |
| hsa-miR-6799 NM_0011458 PROM1 | 0.97435897 |
| hsa-miR-4263 NM_0011458 PROM1 | 0.97435897 |
| hsa-miR-6799 NM_0011458 PROM1 | 0.97435897 |
| hsa-miR-1040 NM_006017 PROM1  | 0.97435897 |
| hsa-miR-1040 NM_0013714 PROM1 | 0.97435897 |
| hsa-miR-1040 NM_0011458 PROM1 | 0.97435897 |
| hsa-miR-196a XM_0115138 PROM1 | 0.98076923 |

|              |            |       |            |
|--------------|------------|-------|------------|
| hsa-miR-196a | NM_006017  | PROM1 | 0.98076923 |
| hsa-miR-640  | NM_0013714 | PROM1 | 0.98076923 |
| hsa-miR-640  | NM_0011458 | PROM1 | 0.98076923 |
| hsa-miR-196a | NM_0011458 | PROM1 | 0.98076923 |
| hsa-miR-770  | NM_0011458 | PROM1 | 0.98076923 |
| hsa-miR-640  | NM_0011458 | PROM1 | 0.98076923 |
| hsa-miR-33a  | XM_0115138 | PROM1 | 1          |
| hsa-miR-199a | XM_0115138 | PROM1 | 1          |
| hsa-miR-199b | XM_0115138 | PROM1 | 1          |
| hsa-miR-30b  | XM_0115138 | PROM1 | 1          |
| hsa-miR-146a | XM_0115138 | PROM1 | 1          |
| hsa-miR-29c  | XM_0115138 | PROM1 | 1          |
| hsa-miR-30c  | XM_0115138 | PROM1 | 1          |
| hsa-miR-219a | XM_0115138 | PROM1 | 1          |
| hsa-miR-369  | XM_0115138 | PROM1 | 1          |
| hsa-miR-151a | XM_0115138 | PROM1 | 1          |
| hsa-miR-346  | XM_0115138 | PROM1 | 1          |
| hsa-miR-424  | XM_0115138 | PROM1 | 1          |
| hsa-miR-483  | XM_0115138 | PROM1 | 1          |
| hsa-miR-506  | XM_0115138 | PROM1 | 1          |
| hsa-miR-625  | XM_0115138 | PROM1 | 1          |
| hsa-miR-625  | XM_0115138 | PROM1 | 1          |
| hsa-miR-625  | XM_0115138 | PROM1 | 1          |
| hsa-miR-646  | XM_0115138 | PROM1 | 1          |
| hsa-miR-647  | XM_0115138 | PROM1 | 1          |
| hsa-miR-653  | XM_0115138 | PROM1 | 1          |
| hsa-miR-656  | XM_0115138 | PROM1 | 1          |
| hsa-miR-550a | XM_0115138 | PROM1 | 1          |
| hsa-miR-1271 | XM_0115138 | PROM1 | 1          |
| hsa-miR-449c | XM_0115138 | PROM1 | 1          |
| hsa-miR-891a | XM_0115138 | PROM1 | 1          |
| hsa-miR-892a | XM_0115138 | PROM1 | 1          |
| hsa-miR-942  | XM_0115138 | PROM1 | 1          |
| hsa-miR-1238 | XM_0115138 | PROM1 | 1          |
| hsa-miR-1288 | XM_0115138 | PROM1 | 1          |
| hsa-miR-1288 | XM_0115138 | PROM1 | 1          |
| hsa-miR-1905 | XM_0115138 | PROM1 | 1          |
| hsa-miR-1912 | XM_0115138 | PROM1 | 1          |
| hsa-miR-313C | XM_0115138 | PROM1 | 1          |
| hsa-miR-544b | XM_0115138 | PROM1 | 1          |
| hsa-miR-3138 | XM_0115138 | PROM1 | 1          |
| hsa-miR-3144 | XM_0115138 | PROM1 | 1          |
| hsa-miR-3065 | XM_0115138 | PROM1 | 1          |
| hsa-miR-320C | XM_0115138 | PROM1 | 1          |
| hsa-miR-4298 | XM_0115138 | PROM1 | 1          |
| hsa-miR-3622 | XM_0115138 | PROM1 | 1          |
| hsa-miR-3681 | XM_0115138 | PROM1 | 1          |
| hsa-miR-3682 | XM_0115138 | PROM1 | 1          |
| hsa-miR-3691 | XM_0115138 | PROM1 | 1          |
| hsa-miR-4428 | XM_0115138 | PROM1 | 1          |
| hsa-miR-4455 | XM_0115138 | PROM1 | 1          |
| hsa-miR-4475 | XM_0115138 | PROM1 | 1          |
| hsa-miR-4482 | XM_0115138 | PROM1 | 1          |
| hsa-miR-4491 | XM_0115138 | PROM1 | 1          |
| hsa-miR-4518 | XM_0115138 | PROM1 | 1          |
| hsa-miR-4521 | XM_0115138 | PROM1 | 1          |
| hsa-miR-4525 | XM_0115138 | PROM1 | 1          |
| hsa-miR-4534 | XM_0115138 | PROM1 | 1          |
| hsa-miR-454C | XM_0115138 | PROM1 | 1          |
| hsa-miR-454C | XM_0115138 | PROM1 | 1          |
| hsa-miR-4647 | XM_0115138 | PROM1 | 1          |
| hsa-miR-4748 | XM_0115138 | PROM1 | 1          |
| hsa-miR-4764 | XM_0115138 | PROM1 | 1          |
| hsa-miR-4776 | XM_0115138 | PROM1 | 1          |
| hsa-miR-5004 | XM_0115138 | PROM1 | 1          |
| hsa-miR-5575 | XM_0115138 | PROM1 | 1          |
| hsa-miR-6074 | XM_0115138 | PROM1 | 1          |
| hsa-miR-6751 | XM_0115138 | PROM1 | 1          |
| hsa-miR-6757 | XM_0115138 | PROM1 | 1          |
| hsa-miR-678C | XM_0115138 | PROM1 | 1          |
| hsa-miR-6783 | XM_0115138 | PROM1 | 1          |
| hsa-miR-6785 | XM_0115138 | PROM1 | 1          |
| hsa-miR-6855 | XM_0115138 | PROM1 | 1          |
| hsa-miR-6864 | XM_0115138 | PROM1 | 1          |
| hsa-miR-6873 | XM_0115138 | PROM1 | 1          |
| hsa-miR-6875 | XM_0115138 | PROM1 | 1          |
| hsa-miR-7105 | XM_0115138 | PROM1 | 1          |
| hsa-miR-7113 | XM_0115138 | PROM1 | 1          |
| hsa-miR-8052 | XM_0115138 | PROM1 | 1          |
| hsa-miR-8055 | XM_0115138 | PROM1 | 1          |
| hsa-miR-8055 | XM_0115138 | PROM1 | 1          |
| hsa-miR-8086 | XM_0115138 | PROM1 | 1          |
| hsa-miR-1035 | XM_0115138 | PROM1 | 1          |
| hsa-miR-1035 | XM_0115138 | PROM1 | 1          |
| hsa-miR-1052 | XM_0115138 | PROM1 | 1          |
| hsa-miR-1211 | XM_0115138 | PROM1 | 1          |
| hsa-miR-1212 | XM_0115138 | PROM1 | 1          |
| hsa-miR-18a  | NM_006017  | PROM1 | 1          |
| hsa-miR-33a  | NM_006017  | PROM1 | 1          |
| hsa-miR-199a | NM_006017  | PROM1 | 1          |
| hsa-miR-199b | NM_006017  | PROM1 | 1          |
| hsa-miR-214  | NM_006017  | PROM1 | 1          |
| hsa-miR-30b  | NM_006017  | PROM1 | 1          |
| hsa-miR-127  | NM_006017  | PROM1 | 1          |

|              |           |       |   |
|--------------|-----------|-------|---|
| hsa-miR-149- | NM_006017 | PROM1 | 1 |
| hsa-miR-29c- | NM_006017 | PROM1 | 1 |
| hsa-miR-219a | NM_006017 | PROM1 | 1 |
| hsa-miR-369- | NM_006017 | PROM1 | 1 |
| hsa-miR-370- | NM_006017 | PROM1 | 1 |
| hsa-miR-372- | NM_006017 | PROM1 | 1 |
| hsa-miR-151a | NM_006017 | PROM1 | 1 |
| hsa-miR-331- | NM_006017 | PROM1 | 1 |
| hsa-miR-346  | NM_006017 | PROM1 | 1 |
| hsa-miR-449a | NM_006017 | PROM1 | 1 |
| hsa-miR-412- | NM_006017 | PROM1 | 1 |
| hsa-miR-483- | NM_006017 | PROM1 | 1 |
| hsa-miR-518d | NM_006017 | PROM1 | 1 |
| hsa-miR-574- | NM_006017 | PROM1 | 1 |
| hsa-miR-583  | NM_006017 | PROM1 | 1 |
| hsa-miR-597- | NM_006017 | PROM1 | 1 |
| hsa-miR-601  | NM_006017 | PROM1 | 1 |
| hsa-miR-625- | NM_006017 | PROM1 | 1 |
| hsa-miR-630  | NM_006017 | PROM1 | 1 |
| hsa-miR-640  | NM_006017 | PROM1 | 1 |
| hsa-miR-647  | NM_006017 | PROM1 | 1 |
| hsa-miR-652- | NM_006017 | PROM1 | 1 |
| hsa-miR-661  | NM_006017 | PROM1 | 1 |
| hsa-miR-449b | NM_006017 | PROM1 | 1 |
| hsa-miR-549a | NM_006017 | PROM1 | 1 |
| hsa-miR-1468 | NM_006017 | PROM1 | 1 |
| hsa-miR-449c | NM_006017 | PROM1 | 1 |
| hsa-miR-892a | NM_006017 | PROM1 | 1 |
| hsa-miR-892b | NM_006017 | PROM1 | 1 |
| hsa-miR-877- | NM_006017 | PROM1 | 1 |
| hsa-miR-216b | NM_006017 | PROM1 | 1 |
| hsa-miR-509- | NM_006017 | PROM1 | 1 |
| hsa-miR-663b | NM_006017 | PROM1 | 1 |
| hsa-miR-1207 | NM_006017 | PROM1 | 1 |
| hsa-miR-1288 | NM_006017 | PROM1 | 1 |
| hsa-miR-1288 | NM_006017 | PROM1 | 1 |
| hsa-miR-1197 | NM_006017 | PROM1 | 1 |
| hsa-miR-1909 | NM_006017 | PROM1 | 1 |
| hsa-miR-191C | NM_006017 | PROM1 | 1 |
| hsa-miR-2278 | NM_006017 | PROM1 | 1 |
| hsa-miR-313C | NM_006017 | PROM1 | 1 |
| hsa-miR-313C | NM_006017 | PROM1 | 1 |
| hsa-miR-3138 | NM_006017 | PROM1 | 1 |
| hsa-miR-3144 | NM_006017 | PROM1 | 1 |
| hsa-miR-3161 | NM_006017 | PROM1 | 1 |
| hsa-miR-3176 | NM_006017 | PROM1 | 1 |
| hsa-miR-3198 | NM_006017 | PROM1 | 1 |
| hsa-miR-3202 | NM_006017 | PROM1 | 1 |
| hsa-miR-4298 | NM_006017 | PROM1 | 1 |
| hsa-miR-4263 | NM_006017 | PROM1 | 1 |
| hsa-miR-3661 | NM_006017 | PROM1 | 1 |
| hsa-miR-3663 | NM_006017 | PROM1 | 1 |
| hsa-miR-3663 | NM_006017 | PROM1 | 1 |
| hsa-miR-3681 | NM_006017 | PROM1 | 1 |
| hsa-miR-3689 | NM_006017 | PROM1 | 1 |
| hsa-miR-3691 | NM_006017 | PROM1 | 1 |
| hsa-miR-642b | NM_006017 | PROM1 | 1 |
| hsa-miR-4428 | NM_006017 | PROM1 | 1 |
| hsa-miR-4433 | NM_006017 | PROM1 | 1 |
| hsa-miR-4443 | NM_006017 | PROM1 | 1 |
| hsa-miR-4453 | NM_006017 | PROM1 | 1 |
| hsa-miR-4454 | NM_006017 | PROM1 | 1 |
| hsa-miR-4455 | NM_006017 | PROM1 | 1 |
| hsa-miR-4463 | NM_006017 | PROM1 | 1 |
| hsa-miR-4475 | NM_006017 | PROM1 | 1 |
| hsa-miR-4476 | NM_006017 | PROM1 | 1 |
| hsa-miR-3689 | NM_006017 | PROM1 | 1 |
| hsa-miR-4482 | NM_006017 | PROM1 | 1 |
| hsa-miR-4482 | NM_006017 | PROM1 | 1 |
| hsa-miR-4491 | NM_006017 | PROM1 | 1 |
| hsa-miR-4518 | NM_006017 | PROM1 | 1 |
| hsa-miR-4521 | NM_006017 | PROM1 | 1 |
| hsa-miR-4525 | NM_006017 | PROM1 | 1 |
| hsa-miR-454C | NM_006017 | PROM1 | 1 |
| hsa-miR-454C | NM_006017 | PROM1 | 1 |
| hsa-miR-4647 | NM_006017 | PROM1 | 1 |
| hsa-miR-4666 | NM_006017 | PROM1 | 1 |
| hsa-miR-4676 | NM_006017 | PROM1 | 1 |
| hsa-miR-4692 | NM_006017 | PROM1 | 1 |
| hsa-miR-4694 | NM_006017 | PROM1 | 1 |
| hsa-miR-4727 | NM_006017 | PROM1 | 1 |
| hsa-miR-3064 | NM_006017 | PROM1 | 1 |
| hsa-miR-4755 | NM_006017 | PROM1 | 1 |
| hsa-miR-4764 | NM_006017 | PROM1 | 1 |
| hsa-miR-2467 | NM_006017 | PROM1 | 1 |
| hsa-miR-5004 | NM_006017 | PROM1 | 1 |
| hsa-miR-5007 | NM_006017 | PROM1 | 1 |
| hsa-miR-5009 | NM_006017 | PROM1 | 1 |
| hsa-miR-5197 | NM_006017 | PROM1 | 1 |
| hsa-miR-510C | NM_006017 | PROM1 | 1 |
| hsa-miR-6074 | NM_006017 | PROM1 | 1 |
| hsa-miR-6127 | NM_006017 | PROM1 | 1 |
| hsa-miR-651C | NM_006017 | PROM1 | 1 |
| hsa-miR-6717 | NM_006017 | PROM1 | 1 |

|              |            |       |   |
|--------------|------------|-------|---|
| hsa-miR-6726 | NM_006017  | PROM1 | 1 |
| hsa-miR-6744 | NM_006017  | PROM1 | 1 |
| hsa-miR-6751 | NM_006017  | PROM1 | 1 |
| hsa-miR-6757 | NM_006017  | PROM1 | 1 |
| hsa-miR-6777 | NM_006017  | PROM1 | 1 |
| hsa-miR-6780 | NM_006017  | PROM1 | 1 |
| hsa-miR-6783 | NM_006017  | PROM1 | 1 |
| hsa-miR-6790 | NM_006017  | PROM1 | 1 |
| hsa-miR-6808 | NM_006017  | PROM1 | 1 |
| hsa-miR-6826 | NM_006017  | PROM1 | 1 |
| hsa-miR-6847 | NM_006017  | PROM1 | 1 |
| hsa-miR-6856 | NM_006017  | PROM1 | 1 |
| hsa-miR-6864 | NM_006017  | PROM1 | 1 |
| hsa-miR-6874 | NM_006017  | PROM1 | 1 |
| hsa-miR-7105 | NM_006017  | PROM1 | 1 |
| hsa-miR-8055 | NM_006017  | PROM1 | 1 |
| hsa-miR-8086 | NM_006017  | PROM1 | 1 |
| hsa-miR-9718 | NM_006017  | PROM1 | 1 |
| hsa-miR-1039 | NM_006017  | PROM1 | 1 |
| hsa-miR-1140 | NM_006017  | PROM1 | 1 |
| hsa-miR-1211 | NM_006017  | PROM1 | 1 |
| hsa-miR-1212 | NM_006017  | PROM1 | 1 |
| hsa-miR-18a- | NM_0013714 | PROM1 | 1 |
| hsa-miR-33a- | NM_0013714 | PROM1 | 1 |
| hsa-miR-29b- | NM_0013714 | PROM1 | 1 |
| hsa-miR-30b- | NM_0013714 | PROM1 | 1 |
| hsa-miR-152- | NM_0013714 | PROM1 | 1 |
| hsa-miR-153- | NM_0013714 | PROM1 | 1 |
| hsa-miR-127- | NM_0013714 | PROM1 | 1 |
| hsa-miR-149- | NM_0013714 | PROM1 | 1 |
| hsa-miR-188- | NM_0013714 | PROM1 | 1 |
| hsa-miR-29c- | NM_0013714 | PROM1 | 1 |
| hsa-miR-365b | NM_0013714 | PROM1 | 1 |
| hsa-miR-331- | NM_0013714 | PROM1 | 1 |
| hsa-miR-346  | NM_0013714 | PROM1 | 1 |
| hsa-miR-424- | NM_0013714 | PROM1 | 1 |
| hsa-miR-449a | NM_0013714 | PROM1 | 1 |
| hsa-miR-412- | NM_0013714 | PROM1 | 1 |
| hsa-miR-483- | NM_0013714 | PROM1 | 1 |
| hsa-miR-526a | NM_0013714 | PROM1 | 1 |
| hsa-miR-518e | NM_0013714 | PROM1 | 1 |
| hsa-miR-574- | NM_0013714 | PROM1 | 1 |
| hsa-miR-583  | NM_0013714 | PROM1 | 1 |
| hsa-miR-601  | NM_0013714 | PROM1 | 1 |
| hsa-miR-625- | NM_0013714 | PROM1 | 1 |
| hsa-miR-630  | NM_0013714 | PROM1 | 1 |
| hsa-miR-646  | NM_0013714 | PROM1 | 1 |
| hsa-miR-652- | NM_0013714 | PROM1 | 1 |
| hsa-miR-661  | NM_0013714 | PROM1 | 1 |
| hsa-miR-449b | NM_0013714 | PROM1 | 1 |
| hsa-miR-653- | NM_0013714 | PROM1 | 1 |
| hsa-miR-549a | NM_0013714 | PROM1 | 1 |
| hsa-miR-449c | NM_0013714 | PROM1 | 1 |
| hsa-miR-892a | NM_0013714 | PROM1 | 1 |
| hsa-miR-216b | NM_0013714 | PROM1 | 1 |
| hsa-miR-509- | NM_0013714 | PROM1 | 1 |
| hsa-miR-1207 | NM_0013714 | PROM1 | 1 |
| hsa-miR-1288 | NM_0013714 | PROM1 | 1 |
| hsa-miR-1288 | NM_0013714 | PROM1 | 1 |
| hsa-miR-1197 | NM_0013714 | PROM1 | 1 |
| hsa-miR-1905 | NM_0013714 | PROM1 | 1 |
| hsa-miR-1910 | NM_0013714 | PROM1 | 1 |
| hsa-miR-1912 | NM_0013714 | PROM1 | 1 |
| hsa-miR-2278 | NM_0013714 | PROM1 | 1 |
| hsa-miR-3120 | NM_0013714 | PROM1 | 1 |
| hsa-miR-3130 | NM_0013714 | PROM1 | 1 |
| hsa-miR-3130 | NM_0013714 | PROM1 | 1 |
| hsa-miR-544b | NM_0013714 | PROM1 | 1 |
| hsa-miR-3138 | NM_0013714 | PROM1 | 1 |
| hsa-miR-3144 | NM_0013714 | PROM1 | 1 |
| hsa-miR-3161 | NM_0013714 | PROM1 | 1 |
| hsa-miR-1193 | NM_0013714 | PROM1 | 1 |
| hsa-miR-4298 | NM_0013714 | PROM1 | 1 |
| hsa-miR-4254 | NM_0013714 | PROM1 | 1 |
| hsa-miR-4263 | NM_0013714 | PROM1 | 1 |
| hsa-miR-4292 | NM_0013714 | PROM1 | 1 |
| hsa-miR-3622 | NM_0013714 | PROM1 | 1 |
| hsa-miR-3645 | NM_0013714 | PROM1 | 1 |
| hsa-miR-3661 | NM_0013714 | PROM1 | 1 |
| hsa-miR-3663 | NM_0013714 | PROM1 | 1 |
| hsa-miR-3663 | NM_0013714 | PROM1 | 1 |
| hsa-miR-3681 | NM_0013714 | PROM1 | 1 |
| hsa-miR-3691 | NM_0013714 | PROM1 | 1 |
| hsa-miR-4428 | NM_0013714 | PROM1 | 1 |
| hsa-miR-4437 | NM_0013714 | PROM1 | 1 |
| hsa-miR-4443 | NM_0013714 | PROM1 | 1 |
| hsa-miR-4455 | NM_0013714 | PROM1 | 1 |
| hsa-miR-4463 | NM_0013714 | PROM1 | 1 |
| hsa-miR-3685 | NM_0013714 | PROM1 | 1 |
| hsa-miR-4482 | NM_0013714 | PROM1 | 1 |
| hsa-miR-4482 | NM_0013714 | PROM1 | 1 |
| hsa-miR-4491 | NM_0013714 | PROM1 | 1 |
| hsa-miR-4495 | NM_0013714 | PROM1 | 1 |
| hsa-miR-4510 | NM_0013714 | PROM1 | 1 |

|                                |   |
|--------------------------------|---|
| hsa-miR-4518 NM_0013714 PROM1  | 1 |
| hsa-miR-4525 NM_0013714 PROM1  | 1 |
| hsa-miR-4534 NM_0013714 PROM1  | 1 |
| hsa-miR-454C NM_0013714 PROM1  | 1 |
| hsa-miR-454C NM_0013714 PROM1  | 1 |
| hsa-miR-4633 NM_0013714 PROM1  | 1 |
| hsa-miR-4647 NM_0013714 PROM1  | 1 |
| hsa-miR-4676 NM_0013714 PROM1  | 1 |
| hsa-miR-4683 NM_0013714 PROM1  | 1 |
| hsa-miR-4694 NM_0013714 PROM1  | 1 |
| hsa-miR-4722 NM_0013714 PROM1  | 1 |
| hsa-miR-4752 NM_0013714 PROM1  | 1 |
| hsa-miR-4755 NM_0013714 PROM1  | 1 |
| hsa-miR-4764 NM_0013714 PROM1  | 1 |
| hsa-miR-4776 NM_0013714 PROM1  | 1 |
| hsa-miR-2467 NM_0013714 PROM1  | 1 |
| hsa-miR-5004 NM_0013714 PROM1  | 1 |
| hsa-miR-5007 NM_0013714 PROM1  | 1 |
| hsa-miR-5009 NM_0013714 PROM1  | 1 |
| hsa-miR-510C NM_0013714 PROM1  | 1 |
| hsa-miR-6074 NM_0013714 PROM1  | 1 |
| hsa-miR-6081 NM_0013714 PROM1  | 1 |
| hsa-miR-378j NM_0013714 PROM1  | 1 |
| hsa-miR-650C NM_0013714 PROM1  | 1 |
| hsa-miR-651C NM_0013714 PROM1  | 1 |
| hsa-miR-6717 NM_0013714 PROM1  | 1 |
| hsa-miR-6751 NM_0013714 PROM1  | 1 |
| hsa-miR-6757 NM_0013714 PROM1  | 1 |
| hsa-miR-6775 NM_0013714 PROM1  | 1 |
| hsa-miR-683C NM_0013714 PROM1  | 1 |
| hsa-miR-6845 NM_0013714 PROM1  | 1 |
| hsa-miR-6847 NM_0013714 PROM1  | 1 |
| hsa-miR-6855 NM_0013714 PROM1  | 1 |
| hsa-miR-6856 NM_0013714 PROM1  | 1 |
| hsa-miR-6861 NM_0013714 PROM1  | 1 |
| hsa-miR-6864 NM_0013714 PROM1  | 1 |
| hsa-miR-6875 NM_0013714 PROM1  | 1 |
| hsa-miR-6892 NM_0013714 PROM1  | 1 |
| hsa-miR-7105 NM_0013714 PROM1  | 1 |
| hsa-miR-7113 NM_0013714 PROM1  | 1 |
| hsa-miR-7158 NM_0013714 PROM1  | 1 |
| hsa-miR-8064 NM_0013714 PROM1  | 1 |
| hsa-miR-1035 NM_0013714 PROM1  | 1 |
| hsa-miR-1035 NM_0013714 PROM1  | 1 |
| hsa-miR-1035 NM_0013714 PROM1  | 1 |
| hsa-miR-1211 NM_0013714 PROM1  | 1 |
| hsa-miR-1212 NM_0013714 PROM1  | 1 |
| hsa-miR-18a- NM_0011458 PROM1  | 1 |
| hsa-miR-19b- NM_0011458 PROM1  | 1 |
| hsa-miR-28-3j NM_0011458 PROM1 | 1 |
| hsa-miR-33a- NM_0011458 PROM1  | 1 |
| hsa-miR-214- NM_0011458 PROM1  | 1 |
| hsa-miR-30b- NM_0011458 PROM1  | 1 |
| hsa-miR-135a NM_0011458 PROM1  | 1 |
| hsa-miR-149- NM_0011458 PROM1  | 1 |
| hsa-miR-188- NM_0011458 PROM1  | 1 |
| hsa-miR-29c- NM_0011458 PROM1  | 1 |
| hsa-miR-30c- NM_0011458 PROM1  | 1 |
| hsa-miR-365t NM_0011458 PROM1  | 1 |
| hsa-miR-369- NM_0011458 PROM1  | 1 |
| hsa-miR-370- NM_0011458 PROM1  | 1 |
| hsa-miR-372- NM_0011458 PROM1  | 1 |
| hsa-miR-331- NM_0011458 PROM1  | 1 |
| hsa-miR-346 NM_0011458 PROM1   | 1 |
| hsa-miR-449a NM_0011458 PROM1  | 1 |
| hsa-miR-412- NM_0011458 PROM1  | 1 |
| hsa-miR-483- NM_0011458 PROM1  | 1 |
| hsa-miR-574- NM_0011458 PROM1  | 1 |
| hsa-miR-583 NM_0011458 PROM1   | 1 |
| hsa-miR-597- NM_0011458 PROM1  | 1 |
| hsa-miR-601 NM_0011458 PROM1   | 1 |
| hsa-miR-625- NM_0011458 PROM1  | 1 |
| hsa-miR-625- NM_0011458 PROM1  | 1 |
| hsa-miR-625- NM_0011458 PROM1  | 1 |
| hsa-miR-646 NM_0011458 PROM1   | 1 |
| hsa-miR-647 NM_0011458 PROM1   | 1 |
| hsa-miR-652- NM_0011458 PROM1  | 1 |
| hsa-miR-449t NM_0011458 PROM1  | 1 |
| hsa-miR-653- NM_0011458 PROM1  | 1 |
| hsa-miR-549a NM_0011458 PROM1  | 1 |
| hsa-miR-1468 NM_0011458 PROM1  | 1 |
| hsa-miR-449c NM_0011458 PROM1  | 1 |
| hsa-miR-892t NM_0011458 PROM1  | 1 |
| hsa-miR-216t NM_0011458 PROM1  | 1 |
| hsa-miR-509- NM_0011458 PROM1  | 1 |
| hsa-miR-663t NM_0011458 PROM1  | 1 |
| hsa-miR-1207 NM_0011458 PROM1  | 1 |
| hsa-miR-1267 NM_0011458 PROM1  | 1 |
| hsa-miR-1288 NM_0011458 PROM1  | 1 |
| hsa-miR-1288 NM_0011458 PROM1  | 1 |
| hsa-miR-1197 NM_0011458 PROM1  | 1 |
| hsa-miR-1197 NM_0011458 PROM1  | 1 |
| hsa-miR-1909 NM_0011458 PROM1  | 1 |
| hsa-miR-1912 NM_0011458 PROM1  | 1 |



|                                |   |
|--------------------------------|---|
| hsa-miR-1915 NM_0011458 PROM1  | 1 |
| hsa-miR-2278 NM_0011458 PROM1  | 1 |
| hsa-miR-3120 NM_0011458 PROM1  | 1 |
| hsa-miR-3130 NM_0011458 PROM1  | 1 |
| hsa-miR-3138 NM_0011458 PROM1  | 1 |
| hsa-miR-3144 NM_0011458 PROM1  | 1 |
| hsa-miR-3161 NM_0011458 PROM1  | 1 |
| hsa-miR-3176 NM_0011458 PROM1  | 1 |
| hsa-miR-3065 NM_0011458 PROM1  | 1 |
| hsa-miR-4298 NM_0011458 PROM1  | 1 |
| hsa-miR-4254 NM_0011458 PROM1  | 1 |
| hsa-miR-4292 NM_0011458 PROM1  | 1 |
| hsa-miR-3645 NM_0011458 PROM1  | 1 |
| hsa-miR-3663 NM_0011458 PROM1  | 1 |
| hsa-miR-3663 NM_0011458 PROM1  | 1 |
| hsa-miR-3681 NM_0011458 PROM1  | 1 |
| hsa-miR-3691 NM_0011458 PROM1  | 1 |
| hsa-miR-642b NM_0011458 PROM1  | 1 |
| hsa-miR-4428 NM_0011458 PROM1  | 1 |
| hsa-miR-4433 NM_0011458 PROM1  | 1 |
| hsa-miR-4437 NM_0011458 PROM1  | 1 |
| hsa-miR-4455 NM_0011458 PROM1  | 1 |
| hsa-miR-3685 NM_0011458 PROM1  | 1 |
| hsa-miR-4482 NM_0011458 PROM1  | 1 |
| hsa-miR-4482 NM_0011458 PROM1  | 1 |
| hsa-miR-4491 NM_0011458 PROM1  | 1 |
| hsa-miR-4518 NM_0011458 PROM1  | 1 |
| hsa-miR-4525 NM_0011458 PROM1  | 1 |
| hsa-miR-4534 NM_0011458 PROM1  | 1 |
| hsa-miR-4540 NM_0011458 PROM1  | 1 |
| hsa-miR-4540 NM_0011458 PROM1  | 1 |
| hsa-miR-454C NM_0011458 PROM1  | 1 |
| hsa-miR-4676 NM_0011458 PROM1  | 1 |
| hsa-miR-4694 NM_0011458 PROM1  | 1 |
| hsa-miR-4727 NM_0011458 PROM1  | 1 |
| hsa-miR-3064 NM_0011458 PROM1  | 1 |
| hsa-miR-122b NM_0011458 PROM1  | 1 |
| hsa-miR-2467 NM_0011458 PROM1  | 1 |
| hsa-miR-5004 NM_0011458 PROM1  | 1 |
| hsa-miR-5007 NM_0011458 PROM1  | 1 |
| hsa-miR-5005 NM_0011458 PROM1  | 1 |
| hsa-miR-5197 NM_0011458 PROM1  | 1 |
| hsa-miR-6074 NM_0011458 PROM1  | 1 |
| hsa-miR-6127 NM_0011458 PROM1  | 1 |
| hsa-miR-6510 NM_0011458 PROM1  | 1 |
| hsa-miR-6717 NM_0011458 PROM1  | 1 |
| hsa-miR-6751 NM_0011458 PROM1  | 1 |
| hsa-miR-6757 NM_0011458 PROM1  | 1 |
| hsa-miR-6777 NM_0011458 PROM1  | 1 |
| hsa-miR-6779 NM_0011458 PROM1  | 1 |
| hsa-miR-6780 NM_0011458 PROM1  | 1 |
| hsa-miR-6783 NM_0011458 PROM1  | 1 |
| hsa-miR-6855 NM_0011458 PROM1  | 1 |
| hsa-miR-6856 NM_0011458 PROM1  | 1 |
| hsa-miR-6864 NM_0011458 PROM1  | 1 |
| hsa-miR-6874 NM_0011458 PROM1  | 1 |
| hsa-miR-6892 NM_0011458 PROM1  | 1 |
| hsa-miR-7106 NM_0011458 PROM1  | 1 |
| hsa-miR-7105 NM_0011458 PROM1  | 1 |
| hsa-miR-7158 NM_0011458 PROM1  | 1 |
| hsa-miR-8086 NM_0011458 PROM1  | 1 |
| hsa-miR-1035 NM_0011458 PROM1  | 1 |
| hsa-miR-1035 NM_0011458 PROM1  | 1 |
| hsa-miR-1211 NM_0011458 PROM1  | 1 |
| hsa-miR-1212 NM_0011458 PROM1  | 1 |
| hsa-miR-18a-1 NM_0011458 PROM1 | 1 |
| hsa-miR-28-3j NM_0011458 PROM1 | 1 |
| hsa-miR-33a-1 NM_0011458 PROM1 | 1 |
| hsa-miR-199a NM_0011458 PROM1  | 1 |
| hsa-miR-199b NM_0011458 PROM1  | 1 |
| hsa-miR-30b-1 NM_0011458 PROM1 | 1 |
| hsa-miR-127-1 NM_0011458 PROM1 | 1 |
| hsa-miR-149-1 NM_0011458 PROM1 | 1 |
| hsa-miR-29c-1 NM_0011458 PROM1 | 1 |
| hsa-miR-219a NM_0011458 PROM1  | 1 |
| hsa-miR-369-1 NM_0011458 PROM1 | 1 |
| hsa-miR-151a NM_0011458 PROM1  | 1 |
| hsa-miR-331-1 NM_0011458 PROM1 | 1 |
| hsa-miR-346 NM_0011458 PROM1   | 1 |
| hsa-miR-449a NM_0011458 PROM1  | 1 |
| hsa-miR-412-1 NM_0011458 PROM1 | 1 |
| hsa-miR-483-1 NM_0011458 PROM1 | 1 |
| hsa-miR-518b NM_0011458 PROM1  | 1 |
| hsa-miR-526a NM_0011458 PROM1  | 1 |
| hsa-miR-518e NM_0011458 PROM1  | 1 |
| hsa-miR-518d NM_0011458 PROM1  | 1 |
| hsa-miR-583 NM_0011458 PROM1   | 1 |
| hsa-miR-601 NM_0011458 PROM1   | 1 |
| hsa-miR-625-1 NM_0011458 PROM1 | 1 |
| hsa-miR-630 NM_0011458 PROM1   | 1 |
| hsa-miR-640 NM_0011458 PROM1   | 1 |
| hsa-miR-647 NM_0011458 PROM1   | 1 |
| hsa-miR-652-1 NM_0011458 PROM1 | 1 |
| hsa-miR-661 NM_0011458 PROM1   | 1 |
| hsa-miR-449b NM_0011458 PROM1  | 1 |

|                                |   |
|--------------------------------|---|
| hsa-miR-549a NM_0011458 PROM1  | 1 |
| hsa-miR-1468 NM_0011458 PROM1  | 1 |
| hsa-miR-449c NM_0011458 PROM1  | 1 |
| hsa-miR-892a NM_0011458 PROM1  | 1 |
| hsa-miR-892b NM_0011458 PROM1  | 1 |
| hsa-miR-877-1 NM_0011458 PROM1 | 1 |
| hsa-miR-509-1 NM_0011458 PROM1 | 1 |
| hsa-miR-663b NM_0011458 PROM1  | 1 |
| hsa-miR-1207 NM_0011458 PROM1  | 1 |
| hsa-miR-1288 NM_0011458 PROM1  | 1 |
| hsa-miR-1288 NM_0011458 PROM1  | 1 |
| hsa-miR-1197 NM_0011458 PROM1  | 1 |
| hsa-miR-1197 NM_0011458 PROM1  | 1 |
| hsa-miR-1908 NM_0011458 PROM1  | 1 |
| hsa-miR-1912 NM_0011458 PROM1  | 1 |
| hsa-miR-1915 NM_0011458 PROM1  | 1 |
| hsa-miR-2278 NM_0011458 PROM1  | 1 |
| hsa-miR-313C NM_0011458 PROM1  | 1 |
| hsa-miR-313C NM_0011458 PROM1  | 1 |
| hsa-miR-3144 NM_0011458 PROM1  | 1 |
| hsa-miR-3176 NM_0011458 PROM1  | 1 |
| hsa-miR-3198 NM_0011458 PROM1  | 1 |
| hsa-miR-4298 NM_0011458 PROM1  | 1 |
| hsa-miR-4254 NM_0011458 PROM1  | 1 |
| hsa-miR-4263 NM_0011458 PROM1  | 1 |
| hsa-miR-4292 NM_0011458 PROM1  | 1 |
| hsa-miR-3622 NM_0011458 PROM1  | 1 |
| hsa-miR-3661 NM_0011458 PROM1  | 1 |
| hsa-miR-3663 NM_0011458 PROM1  | 1 |
| hsa-miR-3663 NM_0011458 PROM1  | 1 |
| hsa-miR-3688 NM_0011458 PROM1  | 1 |
| hsa-miR-3688 NM_0011458 PROM1  | 1 |
| hsa-miR-3691 NM_0011458 PROM1  | 1 |
| hsa-miR-642b NM_0011458 PROM1  | 1 |
| hsa-miR-4428 NM_0011458 PROM1  | 1 |
| hsa-miR-4433 NM_0011458 PROM1  | 1 |
| hsa-miR-4437 NM_0011458 PROM1  | 1 |
| hsa-miR-4443 NM_0011458 PROM1  | 1 |
| hsa-miR-4454 NM_0011458 PROM1  | 1 |
| hsa-miR-4455 NM_0011458 PROM1  | 1 |
| hsa-miR-4463 NM_0011458 PROM1  | 1 |
| hsa-miR-4475 NM_0011458 PROM1  | 1 |
| hsa-miR-3688 NM_0011458 PROM1  | 1 |
| hsa-miR-4482 NM_0011458 PROM1  | 1 |
| hsa-miR-4482 NM_0011458 PROM1  | 1 |
| hsa-miR-4491 NM_0011458 PROM1  | 1 |
| hsa-miR-4495 NM_0011458 PROM1  | 1 |
| hsa-miR-451C NM_0011458 PROM1  | 1 |
| hsa-miR-4518 NM_0011458 PROM1  | 1 |
| hsa-miR-4525 NM_0011458 PROM1  | 1 |
| hsa-miR-4534 NM_0011458 PROM1  | 1 |
| hsa-miR-454C NM_0011458 PROM1  | 1 |
| hsa-miR-454C NM_0011458 PROM1  | 1 |
| hsa-miR-4633 NM_0011458 PROM1  | 1 |
| hsa-miR-4647 NM_0011458 PROM1  | 1 |
| hsa-miR-4666 NM_0011458 PROM1  | 1 |
| hsa-miR-4676 NM_0011458 PROM1  | 1 |
| hsa-miR-4683 NM_0011458 PROM1  | 1 |
| hsa-miR-4694 NM_0011458 PROM1  | 1 |
| hsa-miR-4722 NM_0011458 PROM1  | 1 |
| hsa-miR-4727 NM_0011458 PROM1  | 1 |
| hsa-miR-4755 NM_0011458 PROM1  | 1 |
| hsa-miR-4764 NM_0011458 PROM1  | 1 |
| hsa-miR-4776 NM_0011458 PROM1  | 1 |
| hsa-miR-2467 NM_0011458 PROM1  | 1 |
| hsa-miR-5004 NM_0011458 PROM1  | 1 |
| hsa-miR-5007 NM_0011458 PROM1  | 1 |
| hsa-miR-5008 NM_0011458 PROM1  | 1 |
| hsa-miR-6074 NM_0011458 PROM1  | 1 |
| hsa-miR-6127 NM_0011458 PROM1  | 1 |
| hsa-miR-378j NM_0011458 PROM1  | 1 |
| hsa-miR-650C NM_0011458 PROM1  | 1 |
| hsa-miR-651C NM_0011458 PROM1  | 1 |
| hsa-miR-6717 NM_0011458 PROM1  | 1 |
| hsa-miR-6726 NM_0011458 PROM1  | 1 |
| hsa-miR-6744 NM_0011458 PROM1  | 1 |
| hsa-miR-6751 NM_0011458 PROM1  | 1 |
| hsa-miR-6757 NM_0011458 PROM1  | 1 |
| hsa-miR-678C NM_0011458 PROM1  | 1 |
| hsa-miR-6783 NM_0011458 PROM1  | 1 |
| hsa-miR-679C NM_0011458 PROM1  | 1 |
| hsa-miR-6791 NM_0011458 PROM1  | 1 |
| hsa-miR-6847 NM_0011458 PROM1  | 1 |
| hsa-miR-6856 NM_0011458 PROM1  | 1 |
| hsa-miR-6864 NM_0011458 PROM1  | 1 |
| hsa-miR-6874 NM_0011458 PROM1  | 1 |
| hsa-miR-6878 NM_0011458 PROM1  | 1 |
| hsa-miR-7108 NM_0011458 PROM1  | 1 |
| hsa-miR-7158 NM_0011458 PROM1  | 1 |
| hsa-miR-8058 NM_0011458 PROM1  | 1 |
| hsa-miR-8086 NM_0011458 PROM1  | 1 |
| hsa-miR-9718 NM_0011458 PROM1  | 1 |
| hsa-miR-1038 NM_0011458 PROM1  | 1 |
| hsa-miR-114C NM_0011458 PROM1  | 1 |
| hsa-miR-1211 NM_0011458 PROM1  | 1 |

|                                |   |
|--------------------------------|---|
| hsa-miR-1212 NM_0011458 PROM1  | 1 |
| hsa-miR-18a-1 NM_0011458 PROM1 | 1 |
| hsa-miR-19b-1 NM_0011458 PROM1 | 1 |
| hsa-miR-33a-1 NM_0011458 PROM1 | 1 |
| hsa-miR-29b-1 NM_0011458 PROM1 | 1 |
| hsa-miR-214-1 NM_0011458 PROM1 | 1 |
| hsa-miR-30b-1 NM_0011458 PROM1 | 1 |
| hsa-miR-135a NM_0011458 PROM1  | 1 |
| hsa-miR-153-1 NM_0011458 PROM1 | 1 |
| hsa-miR-127-1 NM_0011458 PROM1 | 1 |
| hsa-miR-146a NM_0011458 PROM1  | 1 |
| hsa-miR-149-1 NM_0011458 PROM1 | 1 |
| hsa-miR-188-1 NM_0011458 PROM1 | 1 |
| hsa-miR-219a NM_0011458 PROM1  | 1 |
| hsa-miR-365t NM_0011458 PROM1  | 1 |
| hsa-miR-369-1 NM_0011458 PROM1 | 1 |
| hsa-miR-370-1 NM_0011458 PROM1 | 1 |
| hsa-miR-371a NM_0011458 PROM1  | 1 |
| hsa-miR-331-1 NM_0011458 PROM1 | 1 |
| hsa-miR-346 NM_0011458 PROM1   | 1 |
| hsa-miR-424-1 NM_0011458 PROM1 | 1 |
| hsa-miR-449a NM_0011458 PROM1  | 1 |
| hsa-miR-412-1 NM_0011458 PROM1 | 1 |
| hsa-miR-526a NM_0011458 PROM1  | 1 |
| hsa-miR-518e NM_0011458 PROM1  | 1 |
| hsa-miR-518d NM_0011458 PROM1  | 1 |
| hsa-miR-583 NM_0011458 PROM1   | 1 |
| hsa-miR-625-1 NM_0011458 PROM1 | 1 |
| hsa-miR-625-2 NM_0011458 PROM1 | 1 |
| hsa-miR-640 NM_0011458 PROM1   | 1 |
| hsa-miR-647 NM_0011458 PROM1   | 1 |
| hsa-miR-661 NM_0011458 PROM1   | 1 |
| hsa-miR-449t NM_0011458 PROM1  | 1 |
| hsa-miR-653-1 NM_0011458 PROM1 | 1 |
| hsa-miR-1468 NM_0011458 PROM1  | 1 |
| hsa-miR-449c NM_0011458 PROM1  | 1 |
| hsa-miR-216t NM_0011458 PROM1  | 1 |
| hsa-miR-509-1 NM_0011458 PROM1 | 1 |
| hsa-miR-1207 NM_0011458 PROM1  | 1 |
| hsa-miR-1288 NM_0011458 PROM1  | 1 |
| hsa-miR-1288 NM_0011458 PROM1  | 1 |
| hsa-miR-1197 NM_0011458 PROM1  | 1 |
| hsa-miR-1905 NM_0011458 PROM1  | 1 |
| hsa-miR-191c NM_0011458 PROM1  | 1 |
| hsa-miR-1912 NM_0011458 PROM1  | 1 |
| hsa-miR-2278 NM_0011458 PROM1  | 1 |
| hsa-miR-312c NM_0011458 PROM1  | 1 |
| hsa-miR-313c NM_0011458 PROM1  | 1 |
| hsa-miR-313c NM_0011458 PROM1  | 1 |
| hsa-miR-544t NM_0011458 PROM1  | 1 |
| hsa-miR-3138 NM_0011458 PROM1  | 1 |
| hsa-miR-3144 NM_0011458 PROM1  | 1 |
| hsa-miR-1193 NM_0011458 PROM1  | 1 |
| hsa-miR-3176 NM_0011458 PROM1  | 1 |
| hsa-miR-3195 NM_0011458 PROM1  | 1 |
| hsa-miR-4298 NM_0011458 PROM1  | 1 |
| hsa-miR-4254 NM_0011458 PROM1  | 1 |
| hsa-miR-4292 NM_0011458 PROM1  | 1 |
| hsa-miR-3622 NM_0011458 PROM1  | 1 |
| hsa-miR-3661 NM_0011458 PROM1  | 1 |
| hsa-miR-3663 NM_0011458 PROM1  | 1 |
| hsa-miR-3663 NM_0011458 PROM1  | 1 |
| hsa-miR-3681 NM_0011458 PROM1  | 1 |
| hsa-miR-3691 NM_0011458 PROM1  | 1 |
| hsa-miR-3713 NM_0011458 PROM1  | 1 |
| hsa-miR-4428 NM_0011458 PROM1  | 1 |
| hsa-miR-4433 NM_0011458 PROM1  | 1 |
| hsa-miR-4437 NM_0011458 PROM1  | 1 |
| hsa-miR-4453 NM_0011458 PROM1  | 1 |
| hsa-miR-4455 NM_0011458 PROM1  | 1 |
| hsa-miR-4463 NM_0011458 PROM1  | 1 |
| hsa-miR-4475 NM_0011458 PROM1  | 1 |
| hsa-miR-3685 NM_0011458 PROM1  | 1 |
| hsa-miR-4482 NM_0011458 PROM1  | 1 |
| hsa-miR-4482 NM_0011458 PROM1  | 1 |
| hsa-miR-4491 NM_0011458 PROM1  | 1 |
| hsa-miR-4522 NM_0011458 PROM1  | 1 |
| hsa-miR-4525 NM_0011458 PROM1  | 1 |
| hsa-miR-454c NM_0011458 PROM1  | 1 |
| hsa-miR-4633 NM_0011458 PROM1  | 1 |
| hsa-miR-4647 NM_0011458 PROM1  | 1 |
| hsa-miR-1343 NM_0011458 PROM1  | 1 |
| hsa-miR-4727 NM_0011458 PROM1  | 1 |
| hsa-miR-4742 NM_0011458 PROM1  | 1 |
| hsa-miR-122t NM_0011458 PROM1  | 1 |
| hsa-miR-4752 NM_0011458 PROM1  | 1 |
| hsa-miR-4776 NM_0011458 PROM1  | 1 |
| hsa-miR-4781 NM_0011458 PROM1  | 1 |
| hsa-miR-2467 NM_0011458 PROM1  | 1 |
| hsa-miR-4786 NM_0011458 PROM1  | 1 |
| hsa-miR-5004 NM_0011458 PROM1  | 1 |
| hsa-miR-5007 NM_0011458 PROM1  | 1 |
| hsa-miR-5008 NM_0011458 PROM1  | 1 |
| hsa-miR-5009 NM_0011458 PROM1  | 1 |

|                                |   |
|--------------------------------|---|
| hsa-miR-510c NM_0011458 PROM1  | 1 |
| hsa-miR-5683 NM_0011458 PROM1  | 1 |
| hsa-miR-6074 NM_0011458 PROM1  | 1 |
| hsa-miR-6127 NM_0011458 PROM1  | 1 |
| hsa-miR-6501 NM_0011458 PROM1  | 1 |
| hsa-miR-6717 NM_0011458 PROM1  | 1 |
| hsa-miR-6726 NM_0011458 PROM1  | 1 |
| hsa-miR-6744 NM_0011458 PROM1  | 1 |
| hsa-miR-6751 NM_0011458 PROM1  | 1 |
| hsa-miR-6757 NM_0011458 PROM1  | 1 |
| hsa-miR-6783 NM_0011458 PROM1  | 1 |
| hsa-miR-683c NM_0011458 PROM1  | 1 |
| hsa-miR-6845 NM_0011458 PROM1  | 1 |
| hsa-miR-6856 NM_0011458 PROM1  | 1 |
| hsa-miR-6864 NM_0011458 PROM1  | 1 |
| hsa-miR-6879 NM_0011458 PROM1  | 1 |
| hsa-miR-6892 NM_0011458 PROM1  | 1 |
| hsa-miR-7109 NM_0011458 PROM1  | 1 |
| hsa-miR-7113 NM_0011458 PROM1  | 1 |
| hsa-miR-8055 NM_0011458 PROM1  | 1 |
| hsa-miR-8064 NM_0011458 PROM1  | 1 |
| hsa-miR-8086 NM_0011458 PROM1  | 1 |
| hsa-miR-1039 NM_0011458 PROM1  | 1 |
| hsa-miR-1039 NM_0011458 PROM1  | 1 |
| hsa-miR-114c NM_0011458 PROM1  | 1 |
| hsa-miR-1211 NM_0011458 PROM1  | 1 |
| hsa-miR-1212 NM_0011458 PROM1  | 1 |
| hsa-miR-18a- NM_0011458 PROM1  | 1 |
| hsa-miR-28-3j NM_0011458 PROM1 | 1 |
| hsa-miR-33a- NM_0011458 PROM1  | 1 |
| hsa-miR-214- NM_0011458 PROM1  | 1 |
| hsa-miR-30b- NM_0011458 PROM1  | 1 |
| hsa-miR-135a NM_0011458 PROM1  | 1 |
| hsa-miR-152- NM_0011458 PROM1  | 1 |
| hsa-miR-153- NM_0011458 PROM1  | 1 |
| hsa-miR-127- NM_0011458 PROM1  | 1 |
| hsa-miR-149- NM_0011458 PROM1  | 1 |
| hsa-miR-29c- NM_0011458 PROM1  | 1 |
| hsa-miR-365b NM_0011458 PROM1  | 1 |
| hsa-miR-370- NM_0011458 PROM1  | 1 |
| hsa-miR-331- NM_0011458 PROM1  | 1 |
| hsa-miR-346 NM_0011458 PROM1   | 1 |
| hsa-miR-449a NM_0011458 PROM1  | 1 |
| hsa-miR-412- NM_0011458 PROM1  | 1 |
| hsa-miR-483- NM_0011458 PROM1  | 1 |
| hsa-miR-574- NM_0011458 PROM1  | 1 |
| hsa-miR-583 NM_0011458 PROM1   | 1 |
| hsa-miR-597- NM_0011458 PROM1  | 1 |
| hsa-miR-601 NM_0011458 PROM1   | 1 |
| hsa-miR-625- NM_0011458 PROM1  | 1 |
| hsa-miR-630 NM_0011458 PROM1   | 1 |
| hsa-miR-652- NM_0011458 PROM1  | 1 |
| hsa-miR-661 NM_0011458 PROM1   | 1 |
| hsa-miR-449b NM_0011458 PROM1  | 1 |
| hsa-miR-653- NM_0011458 PROM1  | 1 |
| hsa-miR-549a NM_0011458 PROM1  | 1 |
| hsa-miR-449c NM_0011458 PROM1  | 1 |
| hsa-miR-892a NM_0011458 PROM1  | 1 |
| hsa-miR-892b NM_0011458 PROM1  | 1 |
| hsa-miR-216b NM_0011458 PROM1  | 1 |
| hsa-miR-509- NM_0011458 PROM1  | 1 |
| hsa-miR-663b NM_0011458 PROM1  | 1 |
| hsa-miR-1207 NM_0011458 PROM1  | 1 |
| hsa-miR-1288 NM_0011458 PROM1  | 1 |
| hsa-miR-1288 NM_0011458 PROM1  | 1 |
| hsa-miR-1197 NM_0011458 PROM1  | 1 |
| hsa-miR-1909 NM_0011458 PROM1  | 1 |
| hsa-miR-191c NM_0011458 PROM1  | 1 |
| hsa-miR-1912 NM_0011458 PROM1  | 1 |
| hsa-miR-1915 NM_0011458 PROM1  | 1 |
| hsa-miR-2278 NM_0011458 PROM1  | 1 |
| hsa-miR-312c NM_0011458 PROM1  | 1 |
| hsa-miR-313c NM_0011458 PROM1  | 1 |
| hsa-miR-544b NM_0011458 PROM1  | 1 |
| hsa-miR-3138 NM_0011458 PROM1  | 1 |
| hsa-miR-3144 NM_0011458 PROM1  | 1 |
| hsa-miR-3176 NM_0011458 PROM1  | 1 |
| hsa-miR-3065 NM_0011458 PROM1  | 1 |
| hsa-miR-4254 NM_0011458 PROM1  | 1 |
| hsa-miR-4263 NM_0011458 PROM1  | 1 |
| hsa-miR-4292 NM_0011458 PROM1  | 1 |
| hsa-miR-3649 NM_0011458 PROM1  | 1 |
| hsa-miR-3661 NM_0011458 PROM1  | 1 |
| hsa-miR-3663 NM_0011458 PROM1  | 1 |
| hsa-miR-3663 NM_0011458 PROM1  | 1 |
| hsa-miR-3681 NM_0011458 PROM1  | 1 |
| hsa-miR-3691 NM_0011458 PROM1  | 1 |
| hsa-miR-642b NM_0011458 PROM1  | 1 |
| hsa-miR-4428 NM_0011458 PROM1  | 1 |
| hsa-miR-4433 NM_0011458 PROM1  | 1 |
| hsa-miR-4437 NM_0011458 PROM1  | 1 |
| hsa-miR-4443 NM_0011458 PROM1  | 1 |
| hsa-miR-4455 NM_0011458 PROM1  | 1 |
| hsa-miR-4463 NM_0011458 PROM1  | 1 |

|                               |   |
|-------------------------------|---|
| hsa-miR-3689 NM_0011458 PROM1 | 1 |
| hsa-miR-4482 NM_0011458 PROM1 | 1 |
| hsa-miR-4482 NM_0011458 PROM1 | 1 |
| hsa-miR-4491 NM_0011458 PROM1 | 1 |
| hsa-miR-4518 NM_0011458 PROM1 | 1 |
| hsa-miR-4525 NM_0011458 PROM1 | 1 |
| hsa-miR-4534 NM_0011458 PROM1 | 1 |
| hsa-miR-4540 NM_0011458 PROM1 | 1 |
| hsa-miR-4540 NM_0011458 PROM1 | 1 |
| hsa-miR-4647 NM_0011458 PROM1 | 1 |
| hsa-miR-4676 NM_0011458 PROM1 | 1 |
| hsa-miR-4679 NM_0011458 PROM1 | 1 |
| hsa-miR-1343 NM_0011458 PROM1 | 1 |
| hsa-miR-4694 NM_0011458 PROM1 | 1 |
| hsa-miR-3064 NM_0011458 PROM1 | 1 |
| hsa-miR-4752 NM_0011458 PROM1 | 1 |
| hsa-miR-4755 NM_0011458 PROM1 | 1 |
| hsa-miR-2467 NM_0011458 PROM1 | 1 |
| hsa-miR-5004 NM_0011458 PROM1 | 1 |
| hsa-miR-5007 NM_0011458 PROM1 | 1 |
| hsa-miR-5009 NM_0011458 PROM1 | 1 |
| hsa-miR-5197 NM_0011458 PROM1 | 1 |
| hsa-miR-5100 NM_0011458 PROM1 | 1 |
| hsa-miR-6074 NM_0011458 PROM1 | 1 |
| hsa-miR-6127 NM_0011458 PROM1 | 1 |
| hsa-miR-6510 NM_0011458 PROM1 | 1 |
| hsa-miR-6717 NM_0011458 PROM1 | 1 |
| hsa-miR-6746 NM_0011458 PROM1 | 1 |
| hsa-miR-6751 NM_0011458 PROM1 | 1 |
| hsa-miR-6757 NM_0011458 PROM1 | 1 |
| hsa-miR-6777 NM_0011458 PROM1 | 1 |
| hsa-miR-6779 NM_0011458 PROM1 | 1 |
| hsa-miR-6783 NM_0011458 PROM1 | 1 |
| hsa-miR-6830 NM_0011458 PROM1 | 1 |
| hsa-miR-6845 NM_0011458 PROM1 | 1 |
| hsa-miR-6847 NM_0011458 PROM1 | 1 |
| hsa-miR-6855 NM_0011458 PROM1 | 1 |
| hsa-miR-6856 NM_0011458 PROM1 | 1 |
| hsa-miR-6864 NM_0011458 PROM1 | 1 |
| hsa-miR-6879 NM_0011458 PROM1 | 1 |
| hsa-miR-6892 NM_0011458 PROM1 | 1 |
| hsa-miR-7106 NM_0011458 PROM1 | 1 |
| hsa-miR-7109 NM_0011458 PROM1 | 1 |
| hsa-miR-7158 NM_0011458 PROM1 | 1 |
| hsa-miR-8064 NM_0011458 PROM1 | 1 |
| hsa-miR-1039 NM_0011458 PROM1 | 1 |
| hsa-miR-1039 NM_0011458 PROM1 | 1 |
| hsa-miR-1211 NM_0011458 PROM1 | 1 |
| hsa-miR-1212 NM_0011458 PROM1 | 1 |
| hsa-miR-18a- NM_0011458 PROM1 | 1 |
| hsa-miR-19b- NM_0011458 PROM1 | 1 |
| hsa-miR-33a- NM_0011458 PROM1 | 1 |
| hsa-miR-29b- NM_0011458 PROM1 | 1 |
| hsa-miR-214- NM_0011458 PROM1 | 1 |
| hsa-miR-30b- NM_0011458 PROM1 | 1 |
| hsa-miR-135a NM_0011458 PROM1 | 1 |
| hsa-miR-153- NM_0011458 PROM1 | 1 |
| hsa-miR-127- NM_0011458 PROM1 | 1 |
| hsa-miR-146a NM_0011458 PROM1 | 1 |
| hsa-miR-188- NM_0011458 PROM1 | 1 |
| hsa-miR-29c- NM_0011458 PROM1 | 1 |
| hsa-miR-219a NM_0011458 PROM1 | 1 |
| hsa-miR-365b NM_0011458 PROM1 | 1 |
| hsa-miR-369- NM_0011458 PROM1 | 1 |
| hsa-miR-331- NM_0011458 PROM1 | 1 |
| hsa-miR-424- NM_0011458 PROM1 | 1 |
| hsa-miR-449a NM_0011458 PROM1 | 1 |
| hsa-miR-412- NM_0011458 PROM1 | 1 |
| hsa-miR-526a NM_0011458 PROM1 | 1 |
| hsa-miR-518e NM_0011458 PROM1 | 1 |
| hsa-miR-518d NM_0011458 PROM1 | 1 |
| hsa-miR-574- NM_0011458 PROM1 | 1 |
| hsa-miR-625- NM_0011458 PROM1 | 1 |
| hsa-miR-625- NM_0011458 PROM1 | 1 |
| hsa-miR-640 NM_0011458 PROM1  | 1 |
| hsa-miR-646 NM_0011458 PROM1  | 1 |
| hsa-miR-647 NM_0011458 PROM1  | 1 |
| hsa-miR-661 NM_0011458 PROM1  | 1 |
| hsa-miR-449b NM_0011458 PROM1 | 1 |
| hsa-miR-653- NM_0011458 PROM1 | 1 |
| hsa-miR-1468 NM_0011458 PROM1 | 1 |
| hsa-miR-449c NM_0011458 PROM1 | 1 |
| hsa-miR-892a NM_0011458 PROM1 | 1 |
| hsa-miR-892b NM_0011458 PROM1 | 1 |
| hsa-miR-509- NM_0011458 PROM1 | 1 |
| hsa-miR-1207 NM_0011458 PROM1 | 1 |
| hsa-miR-1288 NM_0011458 PROM1 | 1 |
| hsa-miR-1288 NM_0011458 PROM1 | 1 |
| hsa-miR-1909 NM_0011458 PROM1 | 1 |
| hsa-miR-1910 NM_0011458 PROM1 | 1 |
| hsa-miR-1912 NM_0011458 PROM1 | 1 |
| hsa-miR-2278 NM_0011458 PROM1 | 1 |
| hsa-miR-3120 NM_0011458 PROM1 | 1 |
| hsa-miR-3120 NM_0011458 PROM1 | 1 |

|                               |            |
|-------------------------------|------------|
| hsa-miR-313c NM_0011458 PROM1 | 1          |
| hsa-miR-544b NM_0011458 PROM1 | 1          |
| hsa-miR-3138 NM_0011458 PROM1 | 1          |
| hsa-miR-3144 NM_0011458 PROM1 | 1          |
| hsa-miR-1193 NM_0011458 PROM1 | 1          |
| hsa-miR-3176 NM_0011458 PROM1 | 1          |
| hsa-miR-3065 NM_0011458 PROM1 | 1          |
| hsa-miR-3199 NM_0011458 PROM1 | 1          |
| hsa-miR-3202 NM_0011458 PROM1 | 1          |
| hsa-miR-4254 NM_0011458 PROM1 | 1          |
| hsa-miR-3661 NM_0011458 PROM1 | 1          |
| hsa-miR-3663 NM_0011458 PROM1 | 1          |
| hsa-miR-3681 NM_0011458 PROM1 | 1          |
| hsa-miR-3691 NM_0011458 PROM1 | 1          |
| hsa-miR-642b NM_0011458 PROM1 | 1          |
| hsa-miR-4453 NM_0011458 PROM1 | 1          |
| hsa-miR-4454 NM_0011458 PROM1 | 1          |
| hsa-miR-4455 NM_0011458 PROM1 | 1          |
| hsa-miR-4463 NM_0011458 PROM1 | 1          |
| hsa-miR-4475 NM_0011458 PROM1 | 1          |
| hsa-miR-3689 NM_0011458 PROM1 | 1          |
| hsa-miR-4491 NM_0011458 PROM1 | 1          |
| hsa-miR-451c NM_0011458 PROM1 | 1          |
| hsa-miR-4518 NM_0011458 PROM1 | 1          |
| hsa-miR-4521 NM_0011458 PROM1 | 1          |
| hsa-miR-4522 NM_0011458 PROM1 | 1          |
| hsa-miR-4525 NM_0011458 PROM1 | 1          |
| hsa-miR-4534 NM_0011458 PROM1 | 1          |
| hsa-miR-454c NM_0011458 PROM1 | 1          |
| hsa-miR-4647 NM_0011458 PROM1 | 1          |
| hsa-miR-4659 NM_0011458 PROM1 | 1          |
| hsa-miR-4676 NM_0011458 PROM1 | 1          |
| hsa-miR-4694 NM_0011458 PROM1 | 1          |
| hsa-miR-4742 NM_0011458 PROM1 | 1          |
| hsa-miR-122b NM_0011458 PROM1 | 1          |
| hsa-miR-4752 NM_0011458 PROM1 | 1          |
| hsa-miR-4764 NM_0011458 PROM1 | 1          |
| hsa-miR-4776 NM_0011458 PROM1 | 1          |
| hsa-miR-4786 NM_0011458 PROM1 | 1          |
| hsa-miR-4799 NM_0011458 PROM1 | 1          |
| hsa-miR-5004 NM_0011458 PROM1 | 1          |
| hsa-miR-5007 NM_0011458 PROM1 | 1          |
| hsa-miR-5008 NM_0011458 PROM1 | 1          |
| hsa-miR-5009 NM_0011458 PROM1 | 1          |
| hsa-miR-5197 NM_0011458 PROM1 | 1          |
| hsa-miR-510c NM_0011458 PROM1 | 1          |
| hsa-miR-5683 NM_0011458 PROM1 | 1          |
| hsa-miR-6074 NM_0011458 PROM1 | 1          |
| hsa-miR-651c NM_0011458 PROM1 | 1          |
| hsa-miR-6717 NM_0011458 PROM1 | 1          |
| hsa-miR-6726 NM_0011458 PROM1 | 1          |
| hsa-miR-6744 NM_0011458 PROM1 | 1          |
| hsa-miR-6751 NM_0011458 PROM1 | 1          |
| hsa-miR-6751 NM_0011458 PROM1 | 1          |
| hsa-miR-6757 NM_0011458 PROM1 | 1          |
| hsa-miR-6785 NM_0011458 PROM1 | 1          |
| hsa-miR-683c NM_0011458 PROM1 | 1          |
| hsa-miR-6845 NM_0011458 PROM1 | 1          |
| hsa-miR-6864 NM_0011458 PROM1 | 1          |
| hsa-miR-6892 NM_0011458 PROM1 | 1          |
| hsa-miR-7106 NM_0011458 PROM1 | 1          |
| hsa-miR-7109 NM_0011458 PROM1 | 1          |
| hsa-miR-7158 NM_0011458 PROM1 | 1          |
| hsa-miR-8055 NM_0011458 PROM1 | 1          |
| hsa-miR-8064 NM_0011458 PROM1 | 1          |
| hsa-miR-8086 NM_0011458 PROM1 | 1          |
| hsa-miR-1039 NM_0011458 PROM1 | 1          |
| hsa-miR-1039 NM_0011458 PROM1 | 1          |
| hsa-miR-1039 NM_0011458 PROM1 | 1          |
| hsa-miR-1211 NM_0011458 PROM1 | 1          |
| hsa-miR-1212 NM_0011458 PROM1 | 1          |
| hsa-miR-4644 NM_002421 MMP1   | 0.96153846 |
| hsa-miR-6835 NM_002421 MMP1   | 0.96153846 |
| hsa-miR-185- NM_002421 MMP1   | 0.98461539 |
| hsa-miR-22-5j NM_002421 MMP1  | 1          |
| hsa-miR-25-5j NM_002421 MMP1  | 1          |
| hsa-miR-105- NM_002421 MMP1   | 1          |
| hsa-miR-211- NM_002421 MMP1   | 1          |
| hsa-miR-214- NM_002421 MMP1   | 1          |
| hsa-miR-138- NM_002421 MMP1   | 1          |
| hsa-miR-143- NM_002421 MMP1   | 1          |
| hsa-miR-127- NM_002421 MMP1   | 1          |
| hsa-miR-149- NM_002421 MMP1   | 1          |
| hsa-miR-185- NM_002421 MMP1   | 1          |
| hsa-miR-188- NM_002421 MMP1   | 1          |
| hsa-miR-193a NM_002421 MMP1   | 1          |
| hsa-miR-370- NM_002421 MMP1   | 1          |
| hsa-miR-337- NM_002421 MMP1   | 1          |
| hsa-miR-486- NM_002421 MMP1   | 1          |
| hsa-miR-511- NM_002421 MMP1   | 1          |
| hsa-miR-520f NM_002421 MMP1   | 1          |
| hsa-miR-526b NM_002421 MMP1   | 1          |
| hsa-miR-520b NM_002421 MMP1   | 1          |
| hsa-miR-518c NM_002421 MMP1   | 1          |

|                         |         |            |
|-------------------------|---------|------------|
| hsa-miR-520g NM_002421  | MMP1    | 1          |
| hsa-miR-519a NM_002421  | MMP1    | 1          |
| hsa-miR-500a NM_002421  | MMP1    | 1          |
| hsa-miR-487b NM_002421  | MMP1    | 1          |
| hsa-miR-558 NM_002421   | MMP1    | 1          |
| hsa-miR-613 NM_002421   | MMP1    | 1          |
| hsa-miR-627- NM_002421  | MMP1    | 1          |
| hsa-miR-646 NM_002421   | MMP1    | 1          |
| hsa-miR-542- NM_002421  | MMP1    | 1          |
| hsa-miR-675- NM_002421  | MMP1    | 1          |
| hsa-miR-888- NM_002421  | MMP1    | 1          |
| hsa-miR-1236 NM_002421  | MMP1    | 1          |
| hsa-miR-1295 NM_002421  | MMP1    | 1          |
| hsa-miR-1255 NM_002421  | MMP1    | 1          |
| hsa-miR-1915 NM_002421  | MMP1    | 1          |
| hsa-miR-3117 NM_002421  | MMP1    | 1          |
| hsa-miR-3118 NM_002421  | MMP1    | 1          |
| hsa-miR-3121 NM_002421  | MMP1    | 1          |
| hsa-miR-3164 NM_002421  | MMP1    | 1          |
| hsa-miR-3173 NM_002421  | MMP1    | 1          |
| hsa-miR-1193 NM_002421  | MMP1    | 1          |
| hsa-miR-4314 NM_002421  | MMP1    | 1          |
| hsa-miR-4276 NM_002421  | MMP1    | 1          |
| hsa-miR-4284 NM_002421  | MMP1    | 1          |
| hsa-miR-3605 NM_002421  | MMP1    | 1          |
| hsa-miR-3655 NM_002421  | MMP1    | 1          |
| hsa-miR-3688 NM_002421  | MMP1    | 1          |
| hsa-miR-3925 NM_002421  | MMP1    | 1          |
| hsa-miR-550b NM_002421  | MMP1    | 1          |
| hsa-miR-442c NM_002421  | MMP1    | 1          |
| hsa-miR-449c NM_002421  | MMP1    | 1          |
| hsa-miR-466c NM_002421  | MMP1    | 1          |
| hsa-miR-4713 NM_002421  | MMP1    | 1          |
| hsa-miR-4772 NM_002421  | MMP1    | 1          |
| hsa-miR-5693 NM_002421  | MMP1    | 1          |
| hsa-miR-5698 NM_002421  | MMP1    | 1          |
| hsa-miR-5705 NM_002421  | MMP1    | 1          |
| hsa-miR-6715 NM_002421  | MMP1    | 1          |
| hsa-miR-6715 NM_002421  | MMP1    | 1          |
| hsa-miR-6744 NM_002421  | MMP1    | 1          |
| hsa-miR-6748 NM_002421  | MMP1    | 1          |
| hsa-miR-6815 NM_002421  | MMP1    | 1          |
| hsa-miR-6818 NM_002421  | MMP1    | 1          |
| hsa-miR-6826 NM_002421  | MMP1    | 1          |
| hsa-miR-684c NM_002421  | MMP1    | 1          |
| hsa-miR-6843 NM_002421  | MMP1    | 1          |
| hsa-miR-6866 NM_002421  | MMP1    | 1          |
| hsa-miR-6873 NM_002421  | MMP1    | 1          |
| hsa-miR-1035 NM_002421  | MMP1    | 1          |
| hsa-miR-3055 NM_002421  | MMP1    | 1          |
| hsa-miR-6881 NM_032257  | ZMYND12 | 0.95384615 |
| hsa-miR-7154 NM_032257  | ZMYND12 | 0.95384615 |
| hsa-miR-103a NM_032257  | ZMYND12 | 0.96153846 |
| hsa-miR-107 NM_032257   | ZMYND12 | 0.96153846 |
| hsa-miR-664a NM_032257  | ZMYND12 | 0.96153846 |
| hsa-miR-4723 NM_032257  | ZMYND12 | 0.96153846 |
| hsa-miR-4742 NM_032257  | ZMYND12 | 0.96153846 |
| hsa-miR-4765 NM_032257  | ZMYND12 | 0.96153846 |
| hsa-miR-5584 NM_032257  | ZMYND12 | 0.96153846 |
| hsa-miR-6728 NM_032257  | ZMYND12 | 0.96153846 |
| hsa-miR-6754 NM_032257  | ZMYND12 | 0.96153846 |
| hsa-miR-676c NM_032257  | ZMYND12 | 0.96153846 |
| hsa-miR-7111 NM_032257  | ZMYND12 | 0.96153846 |
| hsa-miR-6825 NM_032257  | ZMYND12 | 0.97435897 |
| hsa-let-7d-3p NM_032257 | ZMYND12 | 1          |
| hsa-miR-22-5j NM_032257 | ZMYND12 | 1          |
| hsa-miR-25-5j NM_032257 | ZMYND12 | 1          |
| hsa-miR-92a- NM_032257  | ZMYND12 | 1          |
| hsa-miR-197- NM_032257  | ZMYND12 | 1          |
| hsa-miR-199a NM_032257  | ZMYND12 | 1          |
| hsa-miR-129- NM_032257  | ZMYND12 | 1          |
| hsa-miR-30c- NM_032257  | ZMYND12 | 1          |
| hsa-miR-7-5p NM_032257  | ZMYND12 | 1          |
| hsa-miR-199b NM_032257  | ZMYND12 | 1          |
| hsa-miR-222- NM_032257  | ZMYND12 | 1          |
| hsa-miR-135a NM_032257  | ZMYND12 | 1          |
| hsa-miR-129- NM_032257  | ZMYND12 | 1          |
| hsa-miR-320a NM_032257  | ZMYND12 | 1          |
| hsa-miR-30c- NM_032257  | ZMYND12 | 1          |
| hsa-miR-296- NM_032257  | ZMYND12 | 1          |
| hsa-miR-365a NM_032257  | ZMYND12 | 1          |
| hsa-miR-328- NM_032257  | ZMYND12 | 1          |
| hsa-miR-326 NM_032257   | ZMYND12 | 1          |
| hsa-miR-135b NM_032257  | ZMYND12 | 1          |
| hsa-miR-135b NM_032257  | ZMYND12 | 1          |
| hsa-miR-331- NM_032257  | ZMYND12 | 1          |
| hsa-miR-487a NM_032257  | ZMYND12 | 1          |
| hsa-miR-520f NM_032257  | ZMYND12 | 1          |
| hsa-miR-520a NM_032257  | ZMYND12 | 1          |
| hsa-miR-519b NM_032257  | ZMYND12 | 1          |
| hsa-miR-520c NM_032257  | ZMYND12 | 1          |
| hsa-miR-519d NM_032257  | ZMYND12 | 1          |
| hsa-miR-455- NM_032257  | ZMYND12 | 1          |
| hsa-miR-487b NM_032257  | ZMYND12 | 1          |

|              |           |         |   |
|--------------|-----------|---------|---|
| hsa-miR-487b | NM_032257 | ZMYND12 | 1 |
| hsa-miR-550a | NM_032257 | ZMYND12 | 1 |
| hsa-miR-610  | NM_032257 | ZMYND12 | 1 |
| hsa-miR-623  | NM_032257 | ZMYND12 | 1 |
| hsa-miR-33b- | NM_032257 | ZMYND12 | 1 |
| hsa-miR-648  | NM_032257 | ZMYND12 | 1 |
| hsa-miR-1224 | NM_032257 | ZMYND12 | 1 |
| hsa-miR-1301 | NM_032257 | ZMYND12 | 1 |
| hsa-miR-1185 | NM_032257 | ZMYND12 | 1 |
| hsa-miR-877- | NM_032257 | ZMYND12 | 1 |
| hsa-miR-920  | NM_032257 | ZMYND12 | 1 |
| hsa-miR-297  | NM_032257 | ZMYND12 | 1 |
| hsa-miR-1227 | NM_032257 | ZMYND12 | 1 |
| hsa-miR-1229 | NM_032257 | ZMYND12 | 1 |
| hsa-miR-1236 | NM_032257 | ZMYND12 | 1 |
| hsa-miR-1238 | NM_032257 | ZMYND12 | 1 |
| hsa-miR-126C | NM_032257 | ZMYND12 | 1 |
| hsa-miR-1266 | NM_032257 | ZMYND12 | 1 |
| hsa-miR-1825 | NM_032257 | ZMYND12 | 1 |
| hsa-miR-1912 | NM_032257 | ZMYND12 | 1 |
| hsa-miR-1913 | NM_032257 | ZMYND12 | 1 |
| hsa-miR-1915 | NM_032257 | ZMYND12 | 1 |
| hsa-miR-1976 | NM_032257 | ZMYND12 | 1 |
| hsa-miR-2116 | NM_032257 | ZMYND12 | 1 |
| hsa-miR-2276 | NM_032257 | ZMYND12 | 1 |
| hsa-miR-2278 | NM_032257 | ZMYND12 | 1 |
| hsa-miR-711  | NM_032257 | ZMYND12 | 1 |
| hsa-miR-3121 | NM_032257 | ZMYND12 | 1 |
| hsa-miR-3127 | NM_032257 | ZMYND12 | 1 |
| hsa-miR-3162 | NM_032257 | ZMYND12 | 1 |
| hsa-miR-3162 | NM_032257 | ZMYND12 | 1 |
| hsa-miR-3164 | NM_032257 | ZMYND12 | 1 |
| hsa-miR-3173 | NM_032257 | ZMYND12 | 1 |
| hsa-miR-3185 | NM_032257 | ZMYND12 | 1 |
| hsa-miR-3198 | NM_032257 | ZMYND12 | 1 |
| hsa-miR-4298 | NM_032257 | ZMYND12 | 1 |
| hsa-miR-4313 | NM_032257 | ZMYND12 | 1 |
| hsa-miR-4313 | NM_032257 | ZMYND12 | 1 |
| hsa-miR-4314 | NM_032257 | ZMYND12 | 1 |
| hsa-miR-4253 | NM_032257 | ZMYND12 | 1 |
| hsa-miR-4254 | NM_032257 | ZMYND12 | 1 |
| hsa-miR-4326 | NM_032257 | ZMYND12 | 1 |
| hsa-miR-427C | NM_032257 | ZMYND12 | 1 |
| hsa-miR-4271 | NM_032257 | ZMYND12 | 1 |
| hsa-miR-4289 | NM_032257 | ZMYND12 | 1 |
| hsa-miR-362C | NM_032257 | ZMYND12 | 1 |
| hsa-miR-3665 | NM_032257 | ZMYND12 | 1 |
| hsa-miR-318C | NM_032257 | ZMYND12 | 1 |
| hsa-miR-3689 | NM_032257 | ZMYND12 | 1 |
| hsa-miR-3911 | NM_032257 | ZMYND12 | 1 |
| hsa-miR-3928 | NM_032257 | ZMYND12 | 1 |
| hsa-miR-3934 | NM_032257 | ZMYND12 | 1 |
| hsa-miR-3936 | NM_032257 | ZMYND12 | 1 |
| hsa-miR-550b | NM_032257 | ZMYND12 | 1 |
| hsa-miR-4433 | NM_032257 | ZMYND12 | 1 |
| hsa-miR-4433 | NM_032257 | ZMYND12 | 1 |
| hsa-miR-4458 | NM_032257 | ZMYND12 | 1 |
| hsa-miR-4462 | NM_032257 | ZMYND12 | 1 |
| hsa-miR-4465 | NM_032257 | ZMYND12 | 1 |
| hsa-miR-3689 | NM_032257 | ZMYND12 | 1 |
| hsa-miR-4506 | NM_032257 | ZMYND12 | 1 |
| hsa-miR-4534 | NM_032257 | ZMYND12 | 1 |
| hsa-miR-464C | NM_032257 | ZMYND12 | 1 |
| hsa-miR-4646 | NM_032257 | ZMYND12 | 1 |
| hsa-miR-4655 | NM_032257 | ZMYND12 | 1 |
| hsa-miR-4658 | NM_032257 | ZMYND12 | 1 |
| hsa-miR-4685 | NM_032257 | ZMYND12 | 1 |
| hsa-miR-4687 | NM_032257 | ZMYND12 | 1 |
| hsa-miR-4689 | NM_032257 | ZMYND12 | 1 |
| hsa-miR-469C | NM_032257 | ZMYND12 | 1 |
| hsa-miR-4695 | NM_032257 | ZMYND12 | 1 |
| hsa-miR-4697 | NM_032257 | ZMYND12 | 1 |
| hsa-miR-4701 | NM_032257 | ZMYND12 | 1 |
| hsa-miR-4713 | NM_032257 | ZMYND12 | 1 |
| hsa-miR-4716 | NM_032257 | ZMYND12 | 1 |
| hsa-miR-4728 | NM_032257 | ZMYND12 | 1 |
| hsa-miR-4731 | NM_032257 | ZMYND12 | 1 |
| hsa-miR-4746 | NM_032257 | ZMYND12 | 1 |
| hsa-miR-4753 | NM_032257 | ZMYND12 | 1 |
| hsa-miR-4763 | NM_032257 | ZMYND12 | 1 |
| hsa-miR-4778 | NM_032257 | ZMYND12 | 1 |
| hsa-miR-4804 | NM_032257 | ZMYND12 | 1 |
| hsa-miR-5004 | NM_032257 | ZMYND12 | 1 |
| hsa-miR-5008 | NM_032257 | ZMYND12 | 1 |
| hsa-miR-501C | NM_032257 | ZMYND12 | 1 |
| hsa-miR-509C | NM_032257 | ZMYND12 | 1 |
| hsa-miR-5193 | NM_032257 | ZMYND12 | 1 |
| hsa-miR-5196 | NM_032257 | ZMYND12 | 1 |
| hsa-miR-5693 | NM_032257 | ZMYND12 | 1 |
| hsa-miR-607C | NM_032257 | ZMYND12 | 1 |
| hsa-miR-6086 | NM_032257 | ZMYND12 | 1 |
| hsa-miR-6124 | NM_032257 | ZMYND12 | 1 |
| hsa-miR-6127 | NM_032257 | ZMYND12 | 1 |
| hsa-miR-6511 | NM_032257 | ZMYND12 | 1 |



|                         |         |            |
|-------------------------|---------|------------|
| hsa-miR-6514 NM_032257  | ZMYND12 | 1          |
| hsa-miR-6716 NM_032257  | ZMYND12 | 1          |
| hsa-miR-6722 NM_032257  | ZMYND12 | 1          |
| hsa-miR-6727 NM_032257  | ZMYND12 | 1          |
| hsa-miR-6727 NM_032257  | ZMYND12 | 1          |
| hsa-miR-6730 NM_032257  | ZMYND12 | 1          |
| hsa-miR-6731 NM_032257  | ZMYND12 | 1          |
| hsa-miR-6732 NM_032257  | ZMYND12 | 1          |
| hsa-miR-6733 NM_032257  | ZMYND12 | 1          |
| hsa-miR-6734 NM_032257  | ZMYND12 | 1          |
| hsa-miR-6734 NM_032257  | ZMYND12 | 1          |
| hsa-miR-6737 NM_032257  | ZMYND12 | 1          |
| hsa-miR-6738 NM_032257  | ZMYND12 | 1          |
| hsa-miR-6739 NM_032257  | ZMYND12 | 1          |
| hsa-miR-6740 NM_032257  | ZMYND12 | 1          |
| hsa-miR-6741 NM_032257  | ZMYND12 | 1          |
| hsa-miR-6742 NM_032257  | ZMYND12 | 1          |
| hsa-miR-6747 NM_032257  | ZMYND12 | 1          |
| hsa-miR-6747 NM_032257  | ZMYND12 | 1          |
| hsa-miR-6750 NM_032257  | ZMYND12 | 1          |
| hsa-miR-6752 NM_032257  | ZMYND12 | 1          |
| hsa-miR-6753 NM_032257  | ZMYND12 | 1          |
| hsa-miR-6756 NM_032257  | ZMYND12 | 1          |
| hsa-miR-6760 NM_032257  | ZMYND12 | 1          |
| hsa-miR-6762 NM_032257  | ZMYND12 | 1          |
| hsa-miR-6764 NM_032257  | ZMYND12 | 1          |
| hsa-miR-6780 NM_032257  | ZMYND12 | 1          |
| hsa-miR-6781 NM_032257  | ZMYND12 | 1          |
| hsa-miR-6794 NM_032257  | ZMYND12 | 1          |
| hsa-miR-6796 NM_032257  | ZMYND12 | 1          |
| hsa-miR-6797 NM_032257  | ZMYND12 | 1          |
| hsa-miR-6798 NM_032257  | ZMYND12 | 1          |
| hsa-miR-6799 NM_032257  | ZMYND12 | 1          |
| hsa-miR-6803 NM_032257  | ZMYND12 | 1          |
| hsa-miR-6805 NM_032257  | ZMYND12 | 1          |
| hsa-miR-6809 NM_032257  | ZMYND12 | 1          |
| hsa-miR-6812 NM_032257  | ZMYND12 | 1          |
| hsa-miR-6813 NM_032257  | ZMYND12 | 1          |
| hsa-miR-6814 NM_032257  | ZMYND12 | 1          |
| hsa-miR-6822 NM_032257  | ZMYND12 | 1          |
| hsa-miR-6826 NM_032257  | ZMYND12 | 1          |
| hsa-miR-6827 NM_032257  | ZMYND12 | 1          |
| hsa-miR-6831 NM_032257  | ZMYND12 | 1          |
| hsa-miR-6831 NM_032257  | ZMYND12 | 1          |
| hsa-miR-6834 NM_032257  | ZMYND12 | 1          |
| hsa-miR-6840 NM_032257  | ZMYND12 | 1          |
| hsa-miR-6841 NM_032257  | ZMYND12 | 1          |
| hsa-miR-6851 NM_032257  | ZMYND12 | 1          |
| hsa-miR-6865 NM_032257  | ZMYND12 | 1          |
| hsa-miR-6866 NM_032257  | ZMYND12 | 1          |
| hsa-miR-6866 NM_032257  | ZMYND12 | 1          |
| hsa-miR-6867 NM_032257  | ZMYND12 | 1          |
| hsa-miR-6867 NM_032257  | ZMYND12 | 1          |
| hsa-miR-6870 NM_032257  | ZMYND12 | 1          |
| hsa-miR-6872 NM_032257  | ZMYND12 | 1          |
| hsa-miR-6873 NM_032257  | ZMYND12 | 1          |
| hsa-miR-6873 NM_032257  | ZMYND12 | 1          |
| hsa-miR-6876 NM_032257  | ZMYND12 | 1          |
| hsa-miR-6877 NM_032257  | ZMYND12 | 1          |
| hsa-miR-6878 NM_032257  | ZMYND12 | 1          |
| hsa-miR-6879 NM_032257  | ZMYND12 | 1          |
| hsa-miR-6880 NM_032257  | ZMYND12 | 1          |
| hsa-miR-6884 NM_032257  | ZMYND12 | 1          |
| hsa-miR-6885 NM_032257  | ZMYND12 | 1          |
| hsa-miR-6891 NM_032257  | ZMYND12 | 1          |
| hsa-miR-6893 NM_032257  | ZMYND12 | 1          |
| hsa-miR-6893 NM_032257  | ZMYND12 | 1          |
| hsa-miR-6894 NM_032257  | ZMYND12 | 1          |
| hsa-miR-7106 NM_032257  | ZMYND12 | 1          |
| hsa-miR-7107 NM_032257  | ZMYND12 | 1          |
| hsa-miR-7108 NM_032257  | ZMYND12 | 1          |
| hsa-miR-7109 NM_032257  | ZMYND12 | 1          |
| hsa-miR-7111 NM_032257  | ZMYND12 | 1          |
| hsa-miR-7113 NM_032257  | ZMYND12 | 1          |
| hsa-miR-7150 NM_032257  | ZMYND12 | 1          |
| hsa-miR-7515 NM_032257  | ZMYND12 | 1          |
| hsa-miR-7703 NM_032257  | ZMYND12 | 1          |
| hsa-miR-4433 NM_032257  | ZMYND12 | 1          |
| hsa-miR-4433 NM_032257  | ZMYND12 | 1          |
| hsa-miR-7848 NM_032257  | ZMYND12 | 1          |
| hsa-miR-7851 NM_032257  | ZMYND12 | 1          |
| hsa-miR-7974 NM_032257  | ZMYND12 | 1          |
| hsa-miR-8087 NM_032257  | ZMYND12 | 1          |
| hsa-miR-9500 NM_032257  | ZMYND12 | 1          |
| hsa-miR-1022 NM_032257  | ZMYND12 | 1          |
| hsa-miR-1022 NM_032257  | ZMYND12 | 1          |
| hsa-miR-1039 NM_032257  | ZMYND12 | 1          |
| hsa-miR-1039 NM_032257  | ZMYND12 | 1          |
| hsa-miR-1118 NM_032257  | ZMYND12 | 1          |
| hsa-miR-3059 NM_032257  | ZMYND12 | 1          |
| hsa-miR-1211 NM_032257  | ZMYND12 | 1          |
| hsa-miR-518a NM_018100  | EFHC1   | 0.95384615 |
| hsa-miR-6165 NM_018100  | EFHC1   | 0.95384615 |
| hsa-miR-518a NM_0011724 | EFHC1   | 0.95384615 |

|                                |            |
|--------------------------------|------------|
| hsa-miR-6165 NM_0011724 EFHC1  | 0.95384615 |
| hsa-miR-6133 NM_018100 EFHC1   | 0.95512821 |
| hsa-miR-6133 NM_0011724 EFHC1  | 0.95512821 |
| hsa-miR-18a- NM_018100 EFHC1   | 0.96153846 |
| hsa-miR-222- NM_018100 EFHC1   | 0.96153846 |
| hsa-let-7g-3p NM_018100 EFHC1  | 0.96153846 |
| hsa-miR-302a NM_018100 EFHC1   | 0.96153846 |
| hsa-miR-323a NM_018100 EFHC1   | 0.96153846 |
| hsa-miR-339- NM_018100 EFHC1   | 0.96153846 |
| hsa-miR-512- NM_018100 EFHC1   | 0.96153846 |
| hsa-miR-520e NM_018100 EFHC1   | 0.96153846 |
| hsa-miR-596 NM_018100 EFHC1    | 0.96153846 |
| hsa-miR-646 NM_018100 EFHC1    | 0.96153846 |
| hsa-miR-885- NM_018100 EFHC1   | 0.96153846 |
| hsa-miR-3137 NM_018100 EFHC1   | 0.96153846 |
| hsa-miR-3158 NM_018100 EFHC1   | 0.96153846 |
| hsa-miR-3197 NM_018100 EFHC1   | 0.96153846 |
| hsa-miR-4281 NM_018100 EFHC1   | 0.96153846 |
| hsa-miR-4278 NM_018100 EFHC1   | 0.96153846 |
| hsa-miR-362C NM_018100 EFHC1   | 0.96153846 |
| hsa-miR-3663 NM_018100 EFHC1   | 0.96153846 |
| hsa-miR-4436 NM_018100 EFHC1   | 0.96153846 |
| hsa-miR-4715 NM_018100 EFHC1   | 0.96153846 |
| hsa-miR-4746 NM_018100 EFHC1   | 0.96153846 |
| hsa-miR-480C NM_018100 EFHC1   | 0.96153846 |
| hsa-miR-5708 NM_018100 EFHC1   | 0.96153846 |
| hsa-miR-6759 NM_018100 EFHC1   | 0.96153846 |
| hsa-miR-6806 NM_018100 EFHC1   | 0.96153846 |
| hsa-miR-6809 NM_018100 EFHC1   | 0.96153846 |
| hsa-miR-7856 NM_018100 EFHC1   | 0.96153846 |
| hsa-miR-8052 NM_018100 EFHC1   | 0.96153846 |
| hsa-miR-18a- NM_0011724 EFHC1  | 0.96153846 |
| hsa-miR-222- NM_0011724 EFHC1  | 0.96153846 |
| hsa-let-7g-3p NM_0011724 EFHC1 | 0.96153846 |
| hsa-miR-302a NM_0011724 EFHC1  | 0.96153846 |
| hsa-miR-323a NM_0011724 EFHC1  | 0.96153846 |
| hsa-miR-339- NM_0011724 EFHC1  | 0.96153846 |
| hsa-miR-512- NM_0011724 EFHC1  | 0.96153846 |
| hsa-miR-520e NM_0011724 EFHC1  | 0.96153846 |
| hsa-miR-596 NM_0011724 EFHC1   | 0.96153846 |
| hsa-miR-646 NM_0011724 EFHC1   | 0.96153846 |
| hsa-miR-885- NM_0011724 EFHC1  | 0.96153846 |
| hsa-miR-3137 NM_0011724 EFHC1  | 0.96153846 |
| hsa-miR-3158 NM_0011724 EFHC1  | 0.96153846 |
| hsa-miR-3197 NM_0011724 EFHC1  | 0.96153846 |
| hsa-miR-4281 NM_0011724 EFHC1  | 0.96153846 |
| hsa-miR-4278 NM_0011724 EFHC1  | 0.96153846 |
| hsa-miR-362C NM_0011724 EFHC1  | 0.96153846 |
| hsa-miR-3663 NM_0011724 EFHC1  | 0.96153846 |
| hsa-miR-4436 NM_0011724 EFHC1  | 0.96153846 |
| hsa-miR-4715 NM_0011724 EFHC1  | 0.96153846 |
| hsa-miR-4746 NM_0011724 EFHC1  | 0.96153846 |
| hsa-miR-480C NM_0011724 EFHC1  | 0.96153846 |
| hsa-miR-5708 NM_0011724 EFHC1  | 0.96153846 |
| hsa-miR-6759 NM_0011724 EFHC1  | 0.96153846 |
| hsa-miR-6806 NM_0011724 EFHC1  | 0.96153846 |
| hsa-miR-6809 NM_0011724 EFHC1  | 0.96153846 |
| hsa-miR-7856 NM_0011724 EFHC1  | 0.96153846 |
| hsa-miR-8052 NM_0011724 EFHC1  | 0.96153846 |
| hsa-miR-4418 NM_018100 EFHC1   | 0.96923077 |
| hsa-miR-4418 NM_0011724 EFHC1  | 0.96923077 |
| hsa-miR-330- NM_018100 EFHC1   | 0.97435897 |
| hsa-miR-501- NM_018100 EFHC1   | 0.97435897 |
| hsa-miR-550a NM_018100 EFHC1   | 0.97435897 |
| hsa-miR-3173 NM_018100 EFHC1   | 0.97435897 |
| hsa-miR-7159 NM_018100 EFHC1   | 0.97435897 |
| hsa-miR-6516 NM_018100 EFHC1   | 0.97435897 |
| hsa-miR-197- NM_0011724 EFHC1  | 0.97435897 |
| hsa-miR-330- NM_0011724 EFHC1  | 0.97435897 |
| hsa-miR-501- NM_0011724 EFHC1  | 0.97435897 |
| hsa-miR-550a NM_0011724 EFHC1  | 0.97435897 |
| hsa-miR-1181 NM_0011724 EFHC1  | 0.97435897 |
| hsa-miR-3173 NM_0011724 EFHC1  | 0.97435897 |
| hsa-miR-6751 NM_0011724 EFHC1  | 0.97435897 |
| hsa-miR-6516 NM_0011724 EFHC1  | 0.97435897 |
| hsa-miR-4309 NM_018100 EFHC1   | 0.97435897 |
| hsa-miR-4309 NM_0011724 EFHC1  | 0.97435897 |
| hsa-miR-4787 NM_0011724 EFHC1  | 0.97435897 |
| hsa-miR-29b- NM_018100 EFHC1   | 0.98076923 |
| hsa-miR-623 NM_018100 EFHC1    | 0.98076923 |
| hsa-miR-3176 NM_018100 EFHC1   | 0.98076923 |
| hsa-miR-4505 NM_018100 EFHC1   | 0.98076923 |
| hsa-miR-4646 NM_018100 EFHC1   | 0.98076923 |
| hsa-miR-4674 NM_018100 EFHC1   | 0.98076923 |
| hsa-miR-4687 NM_018100 EFHC1   | 0.98076923 |
| hsa-miR-4713 NM_018100 EFHC1   | 0.98076923 |
| hsa-miR-5739 NM_018100 EFHC1   | 0.98076923 |
| hsa-miR-6862 NM_018100 EFHC1   | 0.98076923 |
| hsa-miR-7162 NM_018100 EFHC1   | 0.98076923 |
| hsa-miR-7704 NM_018100 EFHC1   | 0.98076923 |
| hsa-miR-29b- NM_0011724 EFHC1  | 0.98076923 |
| hsa-miR-623 NM_0011724 EFHC1   | 0.98076923 |
| hsa-miR-3176 NM_0011724 EFHC1  | 0.98076923 |
| hsa-miR-4505 NM_0011724 EFHC1  | 0.98076923 |

|                               |            |
|-------------------------------|------------|
| hsa-miR-4646 NM_0011724 EFHC1 | 0.98076923 |
| hsa-miR-4674 NM_0011724 EFHC1 | 0.98076923 |
| hsa-miR-4687 NM_0011724 EFHC1 | 0.98076923 |
| hsa-miR-4713 NM_0011724 EFHC1 | 0.98076923 |
| hsa-miR-5735 NM_0011724 EFHC1 | 0.98076923 |
| hsa-miR-7162 NM_0011724 EFHC1 | 0.98076923 |
| hsa-miR-7704 NM_0011724 EFHC1 | 0.98076923 |
| hsa-miR-133b NM_018100 EFHC1  | 0.98717949 |
| hsa-miR-133c NM_0011724 EFHC1 | 0.98717949 |
| hsa-let-7d-5p NM_018100 EFHC1 | 1          |
| hsa-miR-15a-1 NM_018100 EFHC1 | 1          |
| hsa-miR-23a-1 NM_018100 EFHC1 | 1          |
| hsa-miR-27a-1 NM_018100 EFHC1 | 1          |
| hsa-miR-28-5j NM_018100 EFHC1 | 1          |
| hsa-miR-28-5j NM_018100 EFHC1 | 1          |
| hsa-miR-31-5j NM_018100 EFHC1 | 1          |
| hsa-miR-31-5j NM_018100 EFHC1 | 1          |
| hsa-miR-92a-1 NM_018100 EFHC1 | 1          |
| hsa-miR-101-1 NM_018100 EFHC1 | 1          |
| hsa-miR-29b-1 NM_018100 EFHC1 | 1          |
| hsa-miR-103a NM_018100 EFHC1  | 1          |
| hsa-miR-105-1 NM_018100 EFHC1 | 1          |
| hsa-miR-208a NM_018100 EFHC1  | 1          |
| hsa-miR-30c-1 NM_018100 EFHC1 | 1          |
| hsa-miR-30c-1 NM_018100 EFHC1 | 1          |
| hsa-miR-139-1 NM_018100 EFHC1 | 1          |
| hsa-miR-196a NM_018100 EFHC1  | 1          |
| hsa-miR-199b NM_018100 EFHC1  | 1          |
| hsa-miR-203a NM_018100 EFHC1  | 1          |
| hsa-miR-204-1 NM_018100 EFHC1 | 1          |
| hsa-miR-204-1 NM_018100 EFHC1 | 1          |
| hsa-miR-211-1 NM_018100 EFHC1 | 1          |
| hsa-miR-214-1 NM_018100 EFHC1 | 1          |
| hsa-miR-217-1 NM_018100 EFHC1 | 1          |
| hsa-miR-23b-1 NM_018100 EFHC1 | 1          |
| hsa-miR-23b-1 NM_018100 EFHC1 | 1          |
| hsa-miR-122-1 NM_018100 EFHC1 | 1          |
| hsa-miR-124-1 NM_018100 EFHC1 | 1          |
| hsa-miR-124-1 NM_018100 EFHC1 | 1          |
| hsa-miR-125b NM_018100 EFHC1  | 1          |
| hsa-miR-137-1 NM_018100 EFHC1 | 1          |
| hsa-miR-140-1 NM_018100 EFHC1 | 1          |
| hsa-miR-143-1 NM_018100 EFHC1 | 1          |
| hsa-miR-191-1 NM_018100 EFHC1 | 1          |
| hsa-miR-9-5p NM_018100 EFHC1  | 1          |
| hsa-miR-125a NM_018100 EFHC1  | 1          |
| hsa-miR-125b NM_018100 EFHC1  | 1          |
| hsa-miR-127-1 NM_018100 EFHC1 | 1          |
| hsa-miR-134-1 NM_018100 EFHC1 | 1          |
| hsa-miR-149-1 NM_018100 EFHC1 | 1          |
| hsa-miR-149-1 NM_018100 EFHC1 | 1          |
| hsa-miR-150-1 NM_018100 EFHC1 | 1          |
| hsa-miR-188-1 NM_018100 EFHC1 | 1          |
| hsa-miR-188-1 NM_018100 EFHC1 | 1          |
| hsa-miR-193a NM_018100 EFHC1  | 1          |
| hsa-miR-320a NM_018100 EFHC1  | 1          |
| hsa-miR-320a NM_018100 EFHC1  | 1          |
| hsa-miR-302a NM_018100 EFHC1  | 1          |
| hsa-miR-296-1 NM_018100 EFHC1 | 1          |
| hsa-miR-296-1 NM_018100 EFHC1 | 1          |
| hsa-miR-363-1 NM_018100 EFHC1 | 1          |
| hsa-miR-365a NM_018100 EFHC1  | 1          |
| hsa-miR-365b NM_018100 EFHC1  | 1          |
| hsa-miR-365c NM_018100 EFHC1  | 1          |
| hsa-miR-302c NM_018100 EFHC1  | 1          |
| hsa-miR-302d NM_018100 EFHC1  | 1          |
| hsa-miR-378a NM_018100 EFHC1  | 1          |
| hsa-miR-383-1 NM_018100 EFHC1 | 1          |
| hsa-miR-328-1 NM_018100 EFHC1 | 1          |
| hsa-miR-328-1 NM_018100 EFHC1 | 1          |
| hsa-miR-342-1 NM_018100 EFHC1 | 1          |
| hsa-miR-326 NM_018100 EFHC1   | 1          |
| hsa-miR-151a NM_018100 EFHC1  | 1          |
| hsa-miR-148b NM_018100 EFHC1  | 1          |
| hsa-miR-331-1 NM_018100 EFHC1 | 1          |
| hsa-miR-331-1 NM_018100 EFHC1 | 1          |
| hsa-miR-345-1 NM_018100 EFHC1 | 1          |
| hsa-miR-345-1 NM_018100 EFHC1 | 1          |
| hsa-miR-346 NM_018100 EFHC1   | 1          |
| hsa-miR-196b NM_018100 EFHC1  | 1          |
| hsa-miR-423-1 NM_018100 EFHC1 | 1          |
| hsa-miR-423-1 NM_018100 EFHC1 | 1          |
| hsa-miR-423-1 NM_018100 EFHC1 | 1          |
| hsa-miR-423-1 NM_018100 EFHC1 | 1          |
| hsa-miR-431-1 NM_018100 EFHC1 | 1          |
| hsa-miR-329-1 NM_018100 EFHC1 | 1          |
| hsa-miR-410-1 NM_018100 EFHC1 | 1          |
| hsa-miR-485-1 NM_018100 EFHC1 | 1          |
| hsa-miR-486-1 NM_018100 EFHC1 | 1          |
| hsa-miR-486-1 NM_018100 EFHC1 | 1          |
| hsa-miR-491-1 NM_018100 EFHC1 | 1          |
| hsa-miR-491-1 NM_018100 EFHC1 | 1          |
| hsa-miR-511-1 NM_018100 EFHC1 | 1          |
| hsa-miR-146b NM_018100 EFHC1  | 1          |

|              |           |       |   |
|--------------|-----------|-------|---|
| hsa-miR-146b | NM_018100 | EFHC1 | 1 |
| hsa-miR-202  | NM_018100 | EFHC1 | 1 |
| hsa-miR-432  | NM_018100 | EFHC1 | 1 |
| hsa-miR-496  | NM_018100 | EFHC1 | 1 |
| hsa-miR-193b | NM_018100 | EFHC1 | 1 |
| hsa-miR-193b | NM_018100 | EFHC1 | 1 |
| hsa-miR-193b | NM_018100 | EFHC1 | 1 |
| hsa-miR-512  | NM_018100 | EFHC1 | 1 |
| hsa-miR-498  | NM_018100 | EFHC1 | 1 |
| hsa-miR-520f | NM_018100 | EFHC1 | 1 |
| hsa-miR-525  | NM_018100 | EFHC1 | 1 |
| hsa-miR-525  | NM_018100 | EFHC1 | 1 |
| hsa-miR-525  | NM_018100 | EFHC1 | 1 |
| hsa-miR-526a | NM_018100 | EFHC1 | 1 |
| hsa-miR-517  | NM_018100 | EFHC1 | 1 |
| hsa-miR-519d | NM_018100 | EFHC1 | 1 |
| hsa-miR-519d | NM_018100 | EFHC1 | 1 |
| hsa-miR-520d | NM_018100 | EFHC1 | 1 |
| hsa-miR-520d | NM_018100 | EFHC1 | 1 |
| hsa-miR-518a | NM_018100 | EFHC1 | 1 |
| hsa-miR-527  | NM_018100 | EFHC1 | 1 |
| hsa-miR-501  | NM_018100 | EFHC1 | 1 |
| hsa-miR-502  | NM_018100 | EFHC1 | 1 |
| hsa-miR-502  | NM_018100 | EFHC1 | 1 |
| hsa-miR-503  | NM_018100 | EFHC1 | 1 |
| hsa-miR-504  | NM_018100 | EFHC1 | 1 |
| hsa-miR-504  | NM_018100 | EFHC1 | 1 |
| hsa-miR-508  | NM_018100 | EFHC1 | 1 |
| hsa-miR-509  | NM_018100 | EFHC1 | 1 |
| hsa-miR-510  | NM_018100 | EFHC1 | 1 |
| hsa-miR-455  | NM_018100 | EFHC1 | 1 |
| hsa-miR-92b  | NM_018100 | EFHC1 | 1 |
| hsa-miR-564  | NM_018100 | EFHC1 | 1 |
| hsa-miR-570  | NM_018100 | EFHC1 | 1 |
| hsa-miR-572  | NM_018100 | EFHC1 | 1 |
| hsa-miR-574  | NM_018100 | EFHC1 | 1 |
| hsa-miR-575  | NM_018100 | EFHC1 | 1 |
| hsa-miR-584  | NM_018100 | EFHC1 | 1 |
| hsa-miR-588  | NM_018100 | EFHC1 | 1 |
| hsa-miR-593  | NM_018100 | EFHC1 | 1 |
| hsa-miR-593  | NM_018100 | EFHC1 | 1 |
| hsa-miR-593  | NM_018100 | EFHC1 | 1 |
| hsa-miR-597  | NM_018100 | EFHC1 | 1 |
| hsa-miR-597  | NM_018100 | EFHC1 | 1 |
| hsa-miR-598  | NM_018100 | EFHC1 | 1 |
| hsa-miR-602  | NM_018100 | EFHC1 | 1 |
| hsa-miR-604  | NM_018100 | EFHC1 | 1 |
| hsa-miR-610  | NM_018100 | EFHC1 | 1 |
| hsa-miR-612  | NM_018100 | EFHC1 | 1 |
| hsa-miR-615  | NM_018100 | EFHC1 | 1 |
| hsa-miR-615  | NM_018100 | EFHC1 | 1 |
| hsa-miR-619  | NM_018100 | EFHC1 | 1 |
| hsa-miR-619  | NM_018100 | EFHC1 | 1 |
| hsa-miR-621  | NM_018100 | EFHC1 | 1 |
| hsa-miR-621  | NM_018100 | EFHC1 | 1 |
| hsa-miR-623  | NM_018100 | EFHC1 | 1 |
| hsa-miR-623  | NM_018100 | EFHC1 | 1 |
| hsa-miR-629  | NM_018100 | EFHC1 | 1 |
| hsa-miR-631  | NM_018100 | EFHC1 | 1 |
| hsa-miR-631  | NM_018100 | EFHC1 | 1 |
| hsa-miR-33b  | NM_018100 | EFHC1 | 1 |
| hsa-miR-632  | NM_018100 | EFHC1 | 1 |
| hsa-miR-632  | NM_018100 | EFHC1 | 1 |
| hsa-miR-637  | NM_018100 | EFHC1 | 1 |
| hsa-miR-640  | NM_018100 | EFHC1 | 1 |
| hsa-miR-646  | NM_018100 | EFHC1 | 1 |
| hsa-miR-646  | NM_018100 | EFHC1 | 1 |
| hsa-miR-647  | NM_018100 | EFHC1 | 1 |
| hsa-miR-647  | NM_018100 | EFHC1 | 1 |
| hsa-miR-650  | NM_018100 | EFHC1 | 1 |
| hsa-miR-652  | NM_018100 | EFHC1 | 1 |
| hsa-miR-661  | NM_018100 | EFHC1 | 1 |
| hsa-miR-654  | NM_018100 | EFHC1 | 1 |
| hsa-miR-549a | NM_018100 | EFHC1 | 1 |
| hsa-miR-657  | NM_018100 | EFHC1 | 1 |
| hsa-miR-658  | NM_018100 | EFHC1 | 1 |
| hsa-miR-660  | NM_018100 | EFHC1 | 1 |
| hsa-miR-660  | NM_018100 | EFHC1 | 1 |
| hsa-miR-671  | NM_018100 | EFHC1 | 1 |
| hsa-miR-767  | NM_018100 | EFHC1 | 1 |
| hsa-miR-320b | NM_018100 | EFHC1 | 1 |
| hsa-miR-320c | NM_018100 | EFHC1 | 1 |
| hsa-miR-1296 | NM_018100 | EFHC1 | 1 |
| hsa-miR-1271 | NM_018100 | EFHC1 | 1 |
| hsa-miR-1271 | NM_018100 | EFHC1 | 1 |
| hsa-miR-1301 | NM_018100 | EFHC1 | 1 |
| hsa-miR-1301 | NM_018100 | EFHC1 | 1 |
| hsa-miR-454  | NM_018100 | EFHC1 | 1 |
| hsa-miR-449c | NM_018100 | EFHC1 | 1 |
| hsa-miR-769  | NM_018100 | EFHC1 | 1 |
| hsa-miR-769  | NM_018100 | EFHC1 | 1 |
| hsa-miR-762  | NM_018100 | EFHC1 | 1 |
| hsa-miR-762  | NM_018100 | EFHC1 | 1 |
| hsa-miR-670  | NM_018100 | EFHC1 | 1 |

|              |           |       |   |
|--------------|-----------|-------|---|
| hsa-miR-1298 | NM_018100 | EFHC1 | 1 |
| hsa-miR-2113 | NM_018100 | EFHC1 | 1 |
| hsa-miR-761  | NM_018100 | EFHC1 | 1 |
| hsa-miR-761  | NM_018100 | EFHC1 | 1 |
| hsa-miR-765  | NM_018100 | EFHC1 | 1 |
| hsa-miR-675- | NM_018100 | EFHC1 | 1 |
| hsa-miR-891a | NM_018100 | EFHC1 | 1 |
| hsa-miR-891a | NM_018100 | EFHC1 | 1 |
| hsa-miR-891a | NM_018100 | EFHC1 | 1 |
| hsa-miR-890  | NM_018100 | EFHC1 | 1 |
| hsa-miR-888- | NM_018100 | EFHC1 | 1 |
| hsa-miR-892b | NM_018100 | EFHC1 | 1 |
| hsa-miR-541- | NM_018100 | EFHC1 | 1 |
| hsa-miR-876- | NM_018100 | EFHC1 | 1 |
| hsa-miR-885- | NM_018100 | EFHC1 | 1 |
| hsa-miR-885- | NM_018100 | EFHC1 | 1 |
| hsa-miR-887- | NM_018100 | EFHC1 | 1 |
| hsa-miR-665  | NM_018100 | EFHC1 | 1 |
| hsa-miR-760  | NM_018100 | EFHC1 | 1 |
| hsa-miR-922  | NM_018100 | EFHC1 | 1 |
| hsa-miR-509- | NM_018100 | EFHC1 | 1 |
| hsa-miR-509- | NM_018100 | EFHC1 | 1 |
| hsa-miR-935  | NM_018100 | EFHC1 | 1 |
| hsa-miR-939- | NM_018100 | EFHC1 | 1 |
| hsa-miR-940  | NM_018100 | EFHC1 | 1 |
| hsa-miR-941  | NM_018100 | EFHC1 | 1 |
| hsa-miR-297  | NM_018100 | EFHC1 | 1 |
| hsa-miR-1178 | NM_018100 | EFHC1 | 1 |
| hsa-miR-118C | NM_018100 | EFHC1 | 1 |
| hsa-miR-1182 | NM_018100 | EFHC1 | 1 |
| hsa-miR-1225 | NM_018100 | EFHC1 | 1 |
| hsa-miR-1226 | NM_018100 | EFHC1 | 1 |
| hsa-miR-1226 | NM_018100 | EFHC1 | 1 |
| hsa-miR-1225 | NM_018100 | EFHC1 | 1 |
| hsa-miR-1236 | NM_018100 | EFHC1 | 1 |
| hsa-miR-1236 | NM_018100 | EFHC1 | 1 |
| hsa-miR-1238 | NM_018100 | EFHC1 | 1 |
| hsa-miR-120C | NM_018100 | EFHC1 | 1 |
| hsa-miR-120C | NM_018100 | EFHC1 | 1 |
| hsa-miR-1203 | NM_018100 | EFHC1 | 1 |
| hsa-miR-1205 | NM_018100 | EFHC1 | 1 |
| hsa-miR-1285 | NM_018100 | EFHC1 | 1 |
| hsa-miR-1286 | NM_018100 | EFHC1 | 1 |
| hsa-miR-1287 | NM_018100 | EFHC1 | 1 |
| hsa-miR-1289 | NM_018100 | EFHC1 | 1 |
| hsa-miR-1295 | NM_018100 | EFHC1 | 1 |
| hsa-miR-1295 | NM_018100 | EFHC1 | 1 |
| hsa-miR-1247 | NM_018100 | EFHC1 | 1 |
| hsa-miR-1247 | NM_018100 | EFHC1 | 1 |
| hsa-miR-1251 | NM_018100 | EFHC1 | 1 |
| hsa-miR-1251 | NM_018100 | EFHC1 | 1 |
| hsa-miR-1266 | NM_018100 | EFHC1 | 1 |
| hsa-miR-1272 | NM_018100 | EFHC1 | 1 |
| hsa-miR-1292 | NM_018100 | EFHC1 | 1 |
| hsa-miR-1307 | NM_018100 | EFHC1 | 1 |
| hsa-miR-1537 | NM_018100 | EFHC1 | 1 |
| hsa-miR-1908 | NM_018100 | EFHC1 | 1 |
| hsa-miR-191C | NM_018100 | EFHC1 | 1 |
| hsa-miR-1913 | NM_018100 | EFHC1 | 1 |
| hsa-miR-211C | NM_018100 | EFHC1 | 1 |
| hsa-miR-2114 | NM_018100 | EFHC1 | 1 |
| hsa-miR-2114 | NM_018100 | EFHC1 | 1 |
| hsa-miR-2116 | NM_018100 | EFHC1 | 1 |
| hsa-miR-2276 | NM_018100 | EFHC1 | 1 |
| hsa-miR-711  | NM_018100 | EFHC1 | 1 |
| hsa-miR-711  | NM_018100 | EFHC1 | 1 |
| hsa-miR-2909 | NM_018100 | EFHC1 | 1 |
| hsa-miR-3116 | NM_018100 | EFHC1 | 1 |
| hsa-miR-3117 | NM_018100 | EFHC1 | 1 |
| hsa-miR-3127 | NM_018100 | EFHC1 | 1 |
| hsa-miR-313C | NM_018100 | EFHC1 | 1 |
| hsa-miR-378b | NM_018100 | EFHC1 | 1 |
| hsa-miR-3135 | NM_018100 | EFHC1 | 1 |
| hsa-miR-3136 | NM_018100 | EFHC1 | 1 |
| hsa-miR-3139 | NM_018100 | EFHC1 | 1 |
| hsa-miR-3142 | NM_018100 | EFHC1 | 1 |
| hsa-miR-3146 | NM_018100 | EFHC1 | 1 |
| hsa-miR-548v | NM_018100 | EFHC1 | 1 |
| hsa-miR-3148 | NM_018100 | EFHC1 | 1 |
| hsa-miR-315C | NM_018100 | EFHC1 | 1 |
| hsa-miR-315C | NM_018100 | EFHC1 | 1 |
| hsa-miR-3074 | NM_018100 | EFHC1 | 1 |
| hsa-miR-3155 | NM_018100 | EFHC1 | 1 |
| hsa-miR-3161 | NM_018100 | EFHC1 | 1 |
| hsa-miR-3161 | NM_018100 | EFHC1 | 1 |
| hsa-miR-3162 | NM_018100 | EFHC1 | 1 |
| hsa-miR-3162 | NM_018100 | EFHC1 | 1 |
| hsa-miR-3164 | NM_018100 | EFHC1 | 1 |
| hsa-miR-317C | NM_018100 | EFHC1 | 1 |
| hsa-miR-323b | NM_018100 | EFHC1 | 1 |
| hsa-miR-3174 | NM_018100 | EFHC1 | 1 |
| hsa-miR-3177 | NM_018100 | EFHC1 | 1 |
| hsa-miR-3183 | NM_018100 | EFHC1 | 1 |
| hsa-miR-3183 | NM_018100 | EFHC1 | 1 |

|              |           |       |   |
|--------------|-----------|-------|---|
| hsa-miR-3065 | NM_018100 | EFHC1 | 1 |
| hsa-miR-3187 | NM_018100 | EFHC1 | 1 |
| hsa-miR-3189 | NM_018100 | EFHC1 | 1 |
| hsa-miR-320e | NM_018100 | EFHC1 | 1 |
| hsa-miR-3196 | NM_018100 | EFHC1 | 1 |
| hsa-miR-3197 | NM_018100 | EFHC1 | 1 |
| hsa-miR-3195 | NM_018100 | EFHC1 | 1 |
| hsa-miR-320c | NM_018100 | EFHC1 | 1 |
| hsa-miR-378c | NM_018100 | EFHC1 | 1 |
| hsa-miR-4295 | NM_018100 | EFHC1 | 1 |
| hsa-miR-4299 | NM_018100 | EFHC1 | 1 |
| hsa-miR-430c | NM_018100 | EFHC1 | 1 |
| hsa-miR-4303 | NM_018100 | EFHC1 | 1 |
| hsa-miR-4312 | NM_018100 | EFHC1 | 1 |
| hsa-miR-4314 | NM_018100 | EFHC1 | 1 |
| hsa-miR-4324 | NM_018100 | EFHC1 | 1 |
| hsa-miR-4259 | NM_018100 | EFHC1 | 1 |
| hsa-miR-4326 | NM_018100 | EFHC1 | 1 |
| hsa-miR-4266 | NM_018100 | EFHC1 | 1 |
| hsa-miR-2355 | NM_018100 | EFHC1 | 1 |
| hsa-miR-2355 | NM_018100 | EFHC1 | 1 |
| hsa-miR-4281 | NM_018100 | EFHC1 | 1 |
| hsa-miR-4277 | NM_018100 | EFHC1 | 1 |
| hsa-miR-428c | NM_018100 | EFHC1 | 1 |
| hsa-miR-4283 | NM_018100 | EFHC1 | 1 |
| hsa-miR-4292 | NM_018100 | EFHC1 | 1 |
| hsa-miR-4329 | NM_018100 | EFHC1 | 1 |
| hsa-miR-500b | NM_018100 | EFHC1 | 1 |
| hsa-miR-3614 | NM_018100 | EFHC1 | 1 |
| hsa-miR-3614 | NM_018100 | EFHC1 | 1 |
| hsa-miR-3615 | NM_018100 | EFHC1 | 1 |
| hsa-miR-362c | NM_018100 | EFHC1 | 1 |
| hsa-miR-3622 | NM_018100 | EFHC1 | 1 |
| hsa-miR-3648 | NM_018100 | EFHC1 | 1 |
| hsa-miR-3652 | NM_018100 | EFHC1 | 1 |
| hsa-miR-3652 | NM_018100 | EFHC1 | 1 |
| hsa-miR-366c | NM_018100 | EFHC1 | 1 |
| hsa-miR-3664 | NM_018100 | EFHC1 | 1 |
| hsa-miR-3667 | NM_018100 | EFHC1 | 1 |
| hsa-miR-3667 | NM_018100 | EFHC1 | 1 |
| hsa-miR-3671 | NM_018100 | EFHC1 | 1 |
| hsa-miR-3682 | NM_018100 | EFHC1 | 1 |
| hsa-miR-3685 | NM_018100 | EFHC1 | 1 |
| hsa-miR-3688 | NM_018100 | EFHC1 | 1 |
| hsa-miR-318c | NM_018100 | EFHC1 | 1 |
| hsa-miR-3907 | NM_018100 | EFHC1 | 1 |
| hsa-miR-3909 | NM_018100 | EFHC1 | 1 |
| hsa-miR-3911 | NM_018100 | EFHC1 | 1 |
| hsa-miR-3917 | NM_018100 | EFHC1 | 1 |
| hsa-miR-315c | NM_018100 | EFHC1 | 1 |
| hsa-miR-3926 | NM_018100 | EFHC1 | 1 |
| hsa-miR-676- | NM_018100 | EFHC1 | 1 |
| hsa-miR-3944 | NM_018100 | EFHC1 | 1 |
| hsa-miR-642b | NM_018100 | EFHC1 | 1 |
| hsa-miR-1268 | NM_018100 | EFHC1 | 1 |
| hsa-miR-4421 | NM_018100 | EFHC1 | 1 |
| hsa-miR-378g | NM_018100 | EFHC1 | 1 |
| hsa-miR-4425 | NM_018100 | EFHC1 | 1 |
| hsa-miR-4428 | NM_018100 | EFHC1 | 1 |
| hsa-miR-4429 | NM_018100 | EFHC1 | 1 |
| hsa-miR-4433 | NM_018100 | EFHC1 | 1 |
| hsa-miR-4435 | NM_018100 | EFHC1 | 1 |
| hsa-miR-4437 | NM_018100 | EFHC1 | 1 |
| hsa-miR-4437 | NM_018100 | EFHC1 | 1 |
| hsa-miR-444c | NM_018100 | EFHC1 | 1 |
| hsa-miR-444c | NM_018100 | EFHC1 | 1 |
| hsa-miR-4444 | NM_018100 | EFHC1 | 1 |
| hsa-miR-4446 | NM_018100 | EFHC1 | 1 |
| hsa-miR-4446 | NM_018100 | EFHC1 | 1 |
| hsa-miR-4446 | NM_018100 | EFHC1 | 1 |
| hsa-miR-4447 | NM_018100 | EFHC1 | 1 |
| hsa-miR-4447 | NM_018100 | EFHC1 | 1 |
| hsa-miR-4449 | NM_018100 | EFHC1 | 1 |
| hsa-miR-4453 | NM_018100 | EFHC1 | 1 |
| hsa-miR-4456 | NM_018100 | EFHC1 | 1 |
| hsa-miR-378h | NM_018100 | EFHC1 | 1 |
| hsa-miR-3135 | NM_018100 | EFHC1 | 1 |
| hsa-miR-548a | NM_018100 | EFHC1 | 1 |
| hsa-miR-4465 | NM_018100 | EFHC1 | 1 |
| hsa-miR-4474 | NM_018100 | EFHC1 | 1 |
| hsa-miR-4474 | NM_018100 | EFHC1 | 1 |
| hsa-miR-3689 | NM_018100 | EFHC1 | 1 |
| hsa-miR-3689 | NM_018100 | EFHC1 | 1 |
| hsa-miR-3155 | NM_018100 | EFHC1 | 1 |
| hsa-miR-3155 | NM_018100 | EFHC1 | 1 |
| hsa-miR-448c | NM_018100 | EFHC1 | 1 |
| hsa-miR-448c | NM_018100 | EFHC1 | 1 |
| hsa-miR-4481 | NM_018100 | EFHC1 | 1 |
| hsa-miR-4482 | NM_018100 | EFHC1 | 1 |
| hsa-miR-4482 | NM_018100 | EFHC1 | 1 |
| hsa-miR-4483 | NM_018100 | EFHC1 | 1 |
| hsa-miR-4486 | NM_018100 | EFHC1 | 1 |
| hsa-miR-4489 | NM_018100 | EFHC1 | 1 |
| hsa-miR-4489 | NM_018100 | EFHC1 | 1 |









|               |            |       |   |
|---------------|------------|-------|---|
| hsa-miR-6863  | NM_018100  | EFHC1 | 1 |
| hsa-miR-6865  | NM_018100  | EFHC1 | 1 |
| hsa-miR-6867  | NM_018100  | EFHC1 | 1 |
| hsa-miR-6868  | NM_018100  | EFHC1 | 1 |
| hsa-miR-6872  | NM_018100  | EFHC1 | 1 |
| hsa-miR-6873  | NM_018100  | EFHC1 | 1 |
| hsa-miR-6873  | NM_018100  | EFHC1 | 1 |
| hsa-miR-6875  | NM_018100  | EFHC1 | 1 |
| hsa-miR-6875  | NM_018100  | EFHC1 | 1 |
| hsa-miR-6877  | NM_018100  | EFHC1 | 1 |
| hsa-miR-6877  | NM_018100  | EFHC1 | 1 |
| hsa-miR-6879  | NM_018100  | EFHC1 | 1 |
| hsa-miR-6881  | NM_018100  | EFHC1 | 1 |
| hsa-miR-6883  | NM_018100  | EFHC1 | 1 |
| hsa-miR-6883  | NM_018100  | EFHC1 | 1 |
| hsa-miR-6884  | NM_018100  | EFHC1 | 1 |
| hsa-miR-6885  | NM_018100  | EFHC1 | 1 |
| hsa-miR-6888  | NM_018100  | EFHC1 | 1 |
| hsa-miR-6888  | NM_018100  | EFHC1 | 1 |
| hsa-miR-6889  | NM_018100  | EFHC1 | 1 |
| hsa-miR-6889  | NM_018100  | EFHC1 | 1 |
| hsa-miR-6894  | NM_018100  | EFHC1 | 1 |
| hsa-miR-6894  | NM_018100  | EFHC1 | 1 |
| hsa-miR-6895  | NM_018100  | EFHC1 | 1 |
| hsa-miR-7106  | NM_018100  | EFHC1 | 1 |
| hsa-miR-7107  | NM_018100  | EFHC1 | 1 |
| hsa-miR-7108  | NM_018100  | EFHC1 | 1 |
| hsa-miR-7108  | NM_018100  | EFHC1 | 1 |
| hsa-miR-7109  | NM_018100  | EFHC1 | 1 |
| hsa-miR-7110  | NM_018100  | EFHC1 | 1 |
| hsa-miR-7110  | NM_018100  | EFHC1 | 1 |
| hsa-miR-7111  | NM_018100  | EFHC1 | 1 |
| hsa-miR-7112  | NM_018100  | EFHC1 | 1 |
| hsa-miR-7113  | NM_018100  | EFHC1 | 1 |
| hsa-miR-7114  | NM_018100  | EFHC1 | 1 |
| hsa-miR-7151  | NM_018100  | EFHC1 | 1 |
| hsa-miR-7154  | NM_018100  | EFHC1 | 1 |
| hsa-miR-7155  | NM_018100  | EFHC1 | 1 |
| hsa-miR-7158  | NM_018100  | EFHC1 | 1 |
| hsa-miR-7162  | NM_018100  | EFHC1 | 1 |
| hsa-miR-7704  | NM_018100  | EFHC1 | 1 |
| hsa-miR-7704  | NM_018100  | EFHC1 | 1 |
| hsa-miR-7843  | NM_018100  | EFHC1 | 1 |
| hsa-miR-4433  | NM_018100  | EFHC1 | 1 |
| hsa-miR-1273  | NM_018100  | EFHC1 | 1 |
| hsa-miR-1273  | NM_018100  | EFHC1 | 1 |
| hsa-miR-7845  | NM_018100  | EFHC1 | 1 |
| hsa-miR-7854  | NM_018100  | EFHC1 | 1 |
| hsa-miR-548t  | NM_018100  | EFHC1 | 1 |
| hsa-miR-8052  | NM_018100  | EFHC1 | 1 |
| hsa-miR-8055  | NM_018100  | EFHC1 | 1 |
| hsa-miR-8063  | NM_018100  | EFHC1 | 1 |
| hsa-miR-8064  | NM_018100  | EFHC1 | 1 |
| hsa-miR-8065  | NM_018100  | EFHC1 | 1 |
| hsa-miR-8065  | NM_018100  | EFHC1 | 1 |
| hsa-miR-8075  | NM_018100  | EFHC1 | 1 |
| hsa-miR-8077  | NM_018100  | EFHC1 | 1 |
| hsa-miR-8082  | NM_018100  | EFHC1 | 1 |
| hsa-miR-8089  | NM_018100  | EFHC1 | 1 |
| hsa-miR-9718  | NM_018100  | EFHC1 | 1 |
| hsa-miR-9899  | NM_018100  | EFHC1 | 1 |
| hsa-miR-9899  | NM_018100  | EFHC1 | 1 |
| hsa-miR-9902  | NM_018100  | EFHC1 | 1 |
| hsa-miR-1022  | NM_018100  | EFHC1 | 1 |
| hsa-miR-1022  | NM_018100  | EFHC1 | 1 |
| hsa-miR-1039  | NM_018100  | EFHC1 | 1 |
| hsa-miR-1039  | NM_018100  | EFHC1 | 1 |
| hsa-miR-1040  | NM_018100  | EFHC1 | 1 |
| hsa-miR-1040  | NM_018100  | EFHC1 | 1 |
| hsa-miR-1040  | NM_018100  | EFHC1 | 1 |
| hsa-miR-1039  | NM_018100  | EFHC1 | 1 |
| hsa-miR-1052  | NM_018100  | EFHC1 | 1 |
| hsa-miR-1139  | NM_018100  | EFHC1 | 1 |
| hsa-miR-1140  | NM_018100  | EFHC1 | 1 |
| hsa-miR-1140  | NM_018100  | EFHC1 | 1 |
| hsa-miR-3059  | NM_018100  | EFHC1 | 1 |
| hsa-miR-9851  | NM_018100  | EFHC1 | 1 |
| hsa-miR-1211  | NM_018100  | EFHC1 | 1 |
| hsa-miR-1211  | NM_018100  | EFHC1 | 1 |
| hsa-miR-1211  | NM_018100  | EFHC1 | 1 |
| hsa-miR-1212  | NM_018100  | EFHC1 | 1 |
| hsa-miR-1212  | NM_018100  | EFHC1 | 1 |
| hsa-let-7d-5p | NM_0011724 | EFHC1 | 1 |
| hsa-miR-15a-  | NM_0011724 | EFHC1 | 1 |
| hsa-miR-23a-  | NM_0011724 | EFHC1 | 1 |
| hsa-miR-27a-  | NM_0011724 | EFHC1 | 1 |
| hsa-miR-28-5j | NM_0011724 | EFHC1 | 1 |
| hsa-miR-28-5j | NM_0011724 | EFHC1 | 1 |
| hsa-miR-31-5j | NM_0011724 | EFHC1 | 1 |
| hsa-miR-31-5j | NM_0011724 | EFHC1 | 1 |
| hsa-miR-92a-  | NM_0011724 | EFHC1 | 1 |
| hsa-miR-101-  | NM_0011724 | EFHC1 | 1 |
| hsa-miR-29b-  | NM_0011724 | EFHC1 | 1 |
| hsa-miR-103a  | NM_0011724 | EFHC1 | 1 |
| hsa-miR-105-  | NM_0011724 | EFHC1 | 1 |

|               |            |       |   |
|---------------|------------|-------|---|
| hsa-miR-208a  | NM_0011724 | EFHC1 | 1 |
| hsa-miR-30c-4 | NM_0011724 | EFHC1 | 1 |
| hsa-miR-30c-7 | NM_0011724 | EFHC1 | 1 |
| hsa-miR-139-  | NM_0011724 | EFHC1 | 1 |
| hsa-miR-182-  | NM_0011724 | EFHC1 | 1 |
| hsa-miR-187-  | NM_0011724 | EFHC1 | 1 |
| hsa-miR-196a  | NM_0011724 | EFHC1 | 1 |
| hsa-miR-203a  | NM_0011724 | EFHC1 | 1 |
| hsa-miR-204-  | NM_0011724 | EFHC1 | 1 |
| hsa-miR-204-  | NM_0011724 | EFHC1 | 1 |
| hsa-miR-211-  | NM_0011724 | EFHC1 | 1 |
| hsa-miR-214-  | NM_0011724 | EFHC1 | 1 |
| hsa-miR-217-  | NM_0011724 | EFHC1 | 1 |
| hsa-miR-23b-  | NM_0011724 | EFHC1 | 1 |
| hsa-miR-23b-  | NM_0011724 | EFHC1 | 1 |
| hsa-miR-122-  | NM_0011724 | EFHC1 | 1 |
| hsa-miR-124-  | NM_0011724 | EFHC1 | 1 |
| hsa-miR-124-  | NM_0011724 | EFHC1 | 1 |
| hsa-miR-125b  | NM_0011724 | EFHC1 | 1 |
| hsa-miR-137-  | NM_0011724 | EFHC1 | 1 |
| hsa-miR-140-  | NM_0011724 | EFHC1 | 1 |
| hsa-miR-143-  | NM_0011724 | EFHC1 | 1 |
| hsa-miR-143-  | NM_0011724 | EFHC1 | 1 |
| hsa-miR-191-  | NM_0011724 | EFHC1 | 1 |
| hsa-miR-9-5p  | NM_0011724 | EFHC1 | 1 |
| hsa-miR-125a  | NM_0011724 | EFHC1 | 1 |
| hsa-miR-125b  | NM_0011724 | EFHC1 | 1 |
| hsa-miR-127-  | NM_0011724 | EFHC1 | 1 |
| hsa-miR-134-  | NM_0011724 | EFHC1 | 1 |
| hsa-miR-134-  | NM_0011724 | EFHC1 | 1 |
| hsa-miR-149-  | NM_0011724 | EFHC1 | 1 |
| hsa-miR-149-  | NM_0011724 | EFHC1 | 1 |
| hsa-miR-150-  | NM_0011724 | EFHC1 | 1 |
| hsa-miR-188-  | NM_0011724 | EFHC1 | 1 |
| hsa-miR-188-  | NM_0011724 | EFHC1 | 1 |
| hsa-miR-193a  | NM_0011724 | EFHC1 | 1 |
| hsa-miR-320a  | NM_0011724 | EFHC1 | 1 |
| hsa-miR-320a  | NM_0011724 | EFHC1 | 1 |
| hsa-miR-106b  | NM_0011724 | EFHC1 | 1 |
| hsa-miR-302a  | NM_0011724 | EFHC1 | 1 |
| hsa-miR-296-  | NM_0011724 | EFHC1 | 1 |
| hsa-miR-363-  | NM_0011724 | EFHC1 | 1 |
| hsa-miR-365a  | NM_0011724 | EFHC1 | 1 |
| hsa-miR-365b  | NM_0011724 | EFHC1 | 1 |
| hsa-miR-302c  | NM_0011724 | EFHC1 | 1 |
| hsa-miR-302d  | NM_0011724 | EFHC1 | 1 |
| hsa-miR-378a  | NM_0011724 | EFHC1 | 1 |
| hsa-miR-383-  | NM_0011724 | EFHC1 | 1 |
| hsa-miR-328-  | NM_0011724 | EFHC1 | 1 |
| hsa-miR-328-  | NM_0011724 | EFHC1 | 1 |
| hsa-miR-342-  | NM_0011724 | EFHC1 | 1 |
| hsa-miR-326   | NM_0011724 | EFHC1 | 1 |
| hsa-miR-151a  | NM_0011724 | EFHC1 | 1 |
| hsa-miR-148b  | NM_0011724 | EFHC1 | 1 |
| hsa-miR-331-  | NM_0011724 | EFHC1 | 1 |
| hsa-miR-331-  | NM_0011724 | EFHC1 | 1 |
| hsa-miR-345-  | NM_0011724 | EFHC1 | 1 |
| hsa-miR-345-  | NM_0011724 | EFHC1 | 1 |
| hsa-miR-346   | NM_0011724 | EFHC1 | 1 |
| hsa-miR-196b  | NM_0011724 | EFHC1 | 1 |
| hsa-miR-423-  | NM_0011724 | EFHC1 | 1 |
| hsa-miR-423-  | NM_0011724 | EFHC1 | 1 |
| hsa-miR-423-  | NM_0011724 | EFHC1 | 1 |
| hsa-miR-431-  | NM_0011724 | EFHC1 | 1 |
| hsa-miR-329-  | NM_0011724 | EFHC1 | 1 |
| hsa-miR-410-  | NM_0011724 | EFHC1 | 1 |
| hsa-miR-486-  | NM_0011724 | EFHC1 | 1 |
| hsa-miR-486-  | NM_0011724 | EFHC1 | 1 |
| hsa-miR-491-  | NM_0011724 | EFHC1 | 1 |
| hsa-miR-491-  | NM_0011724 | EFHC1 | 1 |
| hsa-miR-511-  | NM_0011724 | EFHC1 | 1 |
| hsa-miR-146b  | NM_0011724 | EFHC1 | 1 |
| hsa-miR-146b  | NM_0011724 | EFHC1 | 1 |
| hsa-miR-202-  | NM_0011724 | EFHC1 | 1 |
| hsa-miR-432-  | NM_0011724 | EFHC1 | 1 |
| hsa-miR-496   | NM_0011724 | EFHC1 | 1 |
| hsa-miR-193b  | NM_0011724 | EFHC1 | 1 |
| hsa-miR-193b  | NM_0011724 | EFHC1 | 1 |
| hsa-miR-193b  | NM_0011724 | EFHC1 | 1 |
| hsa-miR-512-  | NM_0011724 | EFHC1 | 1 |
| hsa-miR-498-  | NM_0011724 | EFHC1 | 1 |
| hsa-miR-520f  | NM_0011724 | EFHC1 | 1 |
| hsa-miR-525-  | NM_0011724 | EFHC1 | 1 |
| hsa-miR-525-  | NM_0011724 | EFHC1 | 1 |
| hsa-miR-525-  | NM_0011724 | EFHC1 | 1 |
| hsa-miR-526a  | NM_0011724 | EFHC1 | 1 |
| hsa-miR-517-  | NM_0011724 | EFHC1 | 1 |
| hsa-miR-519d  | NM_0011724 | EFHC1 | 1 |
| hsa-miR-519d  | NM_0011724 | EFHC1 | 1 |
| hsa-miR-520d  | NM_0011724 | EFHC1 | 1 |
| hsa-miR-520d  | NM_0011724 | EFHC1 | 1 |
| hsa-miR-518a  | NM_0011724 | EFHC1 | 1 |
| hsa-miR-527   | NM_0011724 | EFHC1 | 1 |
| hsa-miR-501-  | NM_0011724 | EFHC1 | 1 |

|                               |   |
|-------------------------------|---|
| hsa-miR-502-NM_0011724 EFHC1  | 1 |
| hsa-miR-502-NM_0011724 EFHC1  | 1 |
| hsa-miR-503-NM_0011724 EFHC1  | 1 |
| hsa-miR-504-NM_0011724 EFHC1  | 1 |
| hsa-miR-504-NM_0011724 EFHC1  | 1 |
| hsa-miR-508-NM_0011724 EFHC1  | 1 |
| hsa-miR-509-NM_0011724 EFHC1  | 1 |
| hsa-miR-510-NM_0011724 EFHC1  | 1 |
| hsa-miR-455-NM_0011724 EFHC1  | 1 |
| hsa-miR-92b-NM_0011724 EFHC1  | 1 |
| hsa-miR-564 NM_0011724 EFHC1  | 1 |
| hsa-miR-570-NM_0011724 EFHC1  | 1 |
| hsa-miR-572 NM_0011724 EFHC1  | 1 |
| hsa-miR-574-NM_0011724 EFHC1  | 1 |
| hsa-miR-575 NM_0011724 EFHC1  | 1 |
| hsa-miR-584-NM_0011724 EFHC1  | 1 |
| hsa-miR-588 NM_0011724 EFHC1  | 1 |
| hsa-miR-593-NM_0011724 EFHC1  | 1 |
| hsa-miR-593-NM_0011724 EFHC1  | 1 |
| hsa-miR-593-NM_0011724 EFHC1  | 1 |
| hsa-miR-597-NM_0011724 EFHC1  | 1 |
| hsa-miR-597-NM_0011724 EFHC1  | 1 |
| hsa-miR-598-NM_0011724 EFHC1  | 1 |
| hsa-miR-602 NM_0011724 EFHC1  | 1 |
| hsa-miR-604 NM_0011724 EFHC1  | 1 |
| hsa-miR-610 NM_0011724 EFHC1  | 1 |
| hsa-miR-612 NM_0011724 EFHC1  | 1 |
| hsa-miR-615-NM_0011724 EFHC1  | 1 |
| hsa-miR-615-NM_0011724 EFHC1  | 1 |
| hsa-miR-619-NM_0011724 EFHC1  | 1 |
| hsa-miR-619-NM_0011724 EFHC1  | 1 |
| hsa-miR-621 NM_0011724 EFHC1  | 1 |
| hsa-miR-621 NM_0011724 EFHC1  | 1 |
| hsa-miR-623 NM_0011724 EFHC1  | 1 |
| hsa-miR-623 NM_0011724 EFHC1  | 1 |
| hsa-miR-629-NM_0011724 EFHC1  | 1 |
| hsa-miR-631 NM_0011724 EFHC1  | 1 |
| hsa-miR-631 NM_0011724 EFHC1  | 1 |
| hsa-miR-33b-NM_0011724 EFHC1  | 1 |
| hsa-miR-632 NM_0011724 EFHC1  | 1 |
| hsa-miR-632 NM_0011724 EFHC1  | 1 |
| hsa-miR-637 NM_0011724 EFHC1  | 1 |
| hsa-miR-640 NM_0011724 EFHC1  | 1 |
| hsa-miR-646 NM_0011724 EFHC1  | 1 |
| hsa-miR-646 NM_0011724 EFHC1  | 1 |
| hsa-miR-647 NM_0011724 EFHC1  | 1 |
| hsa-miR-647 NM_0011724 EFHC1  | 1 |
| hsa-miR-650 NM_0011724 EFHC1  | 1 |
| hsa-miR-652-NM_0011724 EFHC1  | 1 |
| hsa-miR-661 NM_0011724 EFHC1  | 1 |
| hsa-miR-663a NM_0011724 EFHC1 | 1 |
| hsa-miR-654-NM_0011724 EFHC1  | 1 |
| hsa-miR-549a NM_0011724 EFHC1 | 1 |
| hsa-miR-657 NM_0011724 EFHC1  | 1 |
| hsa-miR-660-NM_0011724 EFHC1  | 1 |
| hsa-miR-660-NM_0011724 EFHC1  | 1 |
| hsa-miR-671-NM_0011724 EFHC1  | 1 |
| hsa-miR-767-NM_0011724 EFHC1  | 1 |
| hsa-miR-320b NM_0011724 EFHC1 | 1 |
| hsa-miR-320c NM_0011724 EFHC1 | 1 |
| hsa-miR-1296 NM_0011724 EFHC1 | 1 |
| hsa-miR-1271 NM_0011724 EFHC1 | 1 |
| hsa-miR-1271 NM_0011724 EFHC1 | 1 |
| hsa-miR-1301 NM_0011724 EFHC1 | 1 |
| hsa-miR-1301 NM_0011724 EFHC1 | 1 |
| hsa-miR-454-NM_0011724 EFHC1  | 1 |
| hsa-miR-449c NM_0011724 EFHC1 | 1 |
| hsa-miR-769-NM_0011724 EFHC1  | 1 |
| hsa-miR-769-NM_0011724 EFHC1  | 1 |
| hsa-miR-762 NM_0011724 EFHC1  | 1 |
| hsa-miR-762 NM_0011724 EFHC1  | 1 |
| hsa-miR-670-NM_0011724 EFHC1  | 1 |
| hsa-miR-1298 NM_0011724 EFHC1 | 1 |
| hsa-miR-2113 NM_0011724 EFHC1 | 1 |
| hsa-miR-761 NM_0011724 EFHC1  | 1 |
| hsa-miR-761 NM_0011724 EFHC1  | 1 |
| hsa-miR-765 NM_0011724 EFHC1  | 1 |
| hsa-miR-675-NM_0011724 EFHC1  | 1 |
| hsa-miR-891a NM_0011724 EFHC1 | 1 |
| hsa-miR-891a NM_0011724 EFHC1 | 1 |
| hsa-miR-891a NM_0011724 EFHC1 | 1 |
| hsa-miR-890 NM_0011724 EFHC1  | 1 |
| hsa-miR-888-NM_0011724 EFHC1  | 1 |
| hsa-miR-892b NM_0011724 EFHC1 | 1 |
| hsa-miR-541-NM_0011724 EFHC1  | 1 |
| hsa-miR-876-NM_0011724 EFHC1  | 1 |
| hsa-miR-885-NM_0011724 EFHC1  | 1 |
| hsa-miR-885-NM_0011724 EFHC1  | 1 |
| hsa-miR-887-NM_0011724 EFHC1  | 1 |
| hsa-miR-665 NM_0011724 EFHC1  | 1 |
| hsa-miR-760 NM_0011724 EFHC1  | 1 |
| hsa-miR-922 NM_0011724 EFHC1  | 1 |
| hsa-miR-509-NM_0011724 EFHC1  | 1 |
| hsa-miR-509-NM_0011724 EFHC1  | 1 |

|              |            |       |   |
|--------------|------------|-------|---|
| hsa-miR-935  | NM_0011724 | EFHC1 | 1 |
| hsa-miR-939  | NM_0011724 | EFHC1 | 1 |
| hsa-miR-940  | NM_0011724 | EFHC1 | 1 |
| hsa-miR-941  | NM_0011724 | EFHC1 | 1 |
| hsa-miR-297  | NM_0011724 | EFHC1 | 1 |
| hsa-miR-1178 | NM_0011724 | EFHC1 | 1 |
| hsa-miR-1180 | NM_0011724 | EFHC1 | 1 |
| hsa-miR-1182 | NM_0011724 | EFHC1 | 1 |
| hsa-miR-1225 | NM_0011724 | EFHC1 | 1 |
| hsa-miR-1226 | NM_0011724 | EFHC1 | 1 |
| hsa-miR-1226 | NM_0011724 | EFHC1 | 1 |
| hsa-miR-1229 | NM_0011724 | EFHC1 | 1 |
| hsa-miR-1236 | NM_0011724 | EFHC1 | 1 |
| hsa-miR-1236 | NM_0011724 | EFHC1 | 1 |
| hsa-miR-1200 | NM_0011724 | EFHC1 | 1 |
| hsa-miR-1200 | NM_0011724 | EFHC1 | 1 |
| hsa-miR-1203 | NM_0011724 | EFHC1 | 1 |
| hsa-miR-1205 | NM_0011724 | EFHC1 | 1 |
| hsa-miR-1285 | NM_0011724 | EFHC1 | 1 |
| hsa-miR-1286 | NM_0011724 | EFHC1 | 1 |
| hsa-miR-1287 | NM_0011724 | EFHC1 | 1 |
| hsa-miR-1289 | NM_0011724 | EFHC1 | 1 |
| hsa-miR-1295 | NM_0011724 | EFHC1 | 1 |
| hsa-miR-1295 | NM_0011724 | EFHC1 | 1 |
| hsa-miR-1251 | NM_0011724 | EFHC1 | 1 |
| hsa-miR-1251 | NM_0011724 | EFHC1 | 1 |
| hsa-miR-1266 | NM_0011724 | EFHC1 | 1 |
| hsa-miR-1272 | NM_0011724 | EFHC1 | 1 |
| hsa-miR-1292 | NM_0011724 | EFHC1 | 1 |
| hsa-miR-1307 | NM_0011724 | EFHC1 | 1 |
| hsa-miR-1537 | NM_0011724 | EFHC1 | 1 |
| hsa-miR-1908 | NM_0011724 | EFHC1 | 1 |
| hsa-miR-1910 | NM_0011724 | EFHC1 | 1 |
| hsa-miR-1913 | NM_0011724 | EFHC1 | 1 |
| hsa-miR-2110 | NM_0011724 | EFHC1 | 1 |
| hsa-miR-2114 | NM_0011724 | EFHC1 | 1 |
| hsa-miR-2114 | NM_0011724 | EFHC1 | 1 |
| hsa-miR-2116 | NM_0011724 | EFHC1 | 1 |
| hsa-miR-2276 | NM_0011724 | EFHC1 | 1 |
| hsa-miR-711  | NM_0011724 | EFHC1 | 1 |
| hsa-miR-711  | NM_0011724 | EFHC1 | 1 |
| hsa-miR-2909 | NM_0011724 | EFHC1 | 1 |
| hsa-miR-3116 | NM_0011724 | EFHC1 | 1 |
| hsa-miR-3117 | NM_0011724 | EFHC1 | 1 |
| hsa-miR-3127 | NM_0011724 | EFHC1 | 1 |
| hsa-miR-3130 | NM_0011724 | EFHC1 | 1 |
| hsa-miR-378b | NM_0011724 | EFHC1 | 1 |
| hsa-miR-3135 | NM_0011724 | EFHC1 | 1 |
| hsa-miR-3136 | NM_0011724 | EFHC1 | 1 |
| hsa-miR-3139 | NM_0011724 | EFHC1 | 1 |
| hsa-miR-3142 | NM_0011724 | EFHC1 | 1 |
| hsa-miR-3146 | NM_0011724 | EFHC1 | 1 |
| hsa-miR-548v | NM_0011724 | EFHC1 | 1 |
| hsa-miR-3148 | NM_0011724 | EFHC1 | 1 |
| hsa-miR-3150 | NM_0011724 | EFHC1 | 1 |
| hsa-miR-3150 | NM_0011724 | EFHC1 | 1 |
| hsa-miR-3074 | NM_0011724 | EFHC1 | 1 |
| hsa-miR-3155 | NM_0011724 | EFHC1 | 1 |
| hsa-miR-3161 | NM_0011724 | EFHC1 | 1 |
| hsa-miR-3161 | NM_0011724 | EFHC1 | 1 |
| hsa-miR-3162 | NM_0011724 | EFHC1 | 1 |
| hsa-miR-3162 | NM_0011724 | EFHC1 | 1 |
| hsa-miR-3164 | NM_0011724 | EFHC1 | 1 |
| hsa-miR-3170 | NM_0011724 | EFHC1 | 1 |
| hsa-miR-3171 | NM_0011724 | EFHC1 | 1 |
| hsa-miR-323b | NM_0011724 | EFHC1 | 1 |
| hsa-miR-3174 | NM_0011724 | EFHC1 | 1 |
| hsa-miR-3177 | NM_0011724 | EFHC1 | 1 |
| hsa-miR-3183 | NM_0011724 | EFHC1 | 1 |
| hsa-miR-3183 | NM_0011724 | EFHC1 | 1 |
| hsa-miR-3065 | NM_0011724 | EFHC1 | 1 |
| hsa-miR-3187 | NM_0011724 | EFHC1 | 1 |
| hsa-miR-3189 | NM_0011724 | EFHC1 | 1 |
| hsa-miR-320e | NM_0011724 | EFHC1 | 1 |
| hsa-miR-3196 | NM_0011724 | EFHC1 | 1 |
| hsa-miR-3197 | NM_0011724 | EFHC1 | 1 |
| hsa-miR-3199 | NM_0011724 | EFHC1 | 1 |
| hsa-miR-3200 | NM_0011724 | EFHC1 | 1 |
| hsa-miR-378c | NM_0011724 | EFHC1 | 1 |
| hsa-miR-4295 | NM_0011724 | EFHC1 | 1 |
| hsa-miR-4295 | NM_0011724 | EFHC1 | 1 |
| hsa-miR-4300 | NM_0011724 | EFHC1 | 1 |
| hsa-miR-4303 | NM_0011724 | EFHC1 | 1 |
| hsa-miR-4312 | NM_0011724 | EFHC1 | 1 |
| hsa-miR-4314 | NM_0011724 | EFHC1 | 1 |
| hsa-miR-4324 | NM_0011724 | EFHC1 | 1 |
| hsa-miR-4259 | NM_0011724 | EFHC1 | 1 |
| hsa-miR-4326 | NM_0011724 | EFHC1 | 1 |
| hsa-miR-4266 | NM_0011724 | EFHC1 | 1 |
| hsa-miR-2355 | NM_0011724 | EFHC1 | 1 |
| hsa-miR-2355 | NM_0011724 | EFHC1 | 1 |
| hsa-miR-4281 | NM_0011724 | EFHC1 | 1 |
| hsa-miR-4277 | NM_0011724 | EFHC1 | 1 |
| hsa-miR-4280 | NM_0011724 | EFHC1 | 1 |

|                                |   |
|--------------------------------|---|
| hsa-miR-4283 NM_0011724 EFHC1  | 1 |
| hsa-miR-4292 NM_0011724 EFHC1  | 1 |
| hsa-miR-4329 NM_0011724 EFHC1  | 1 |
| hsa-miR-500e NM_0011724 EFHC1  | 1 |
| hsa-miR-3605 NM_0011724 EFHC1  | 1 |
| hsa-miR-3605 NM_0011724 EFHC1  | 1 |
| hsa-miR-3614 NM_0011724 EFHC1  | 1 |
| hsa-miR-3614 NM_0011724 EFHC1  | 1 |
| hsa-miR-3615 NM_0011724 EFHC1  | 1 |
| hsa-miR-3620 NM_0011724 EFHC1  | 1 |
| hsa-miR-3622 NM_0011724 EFHC1  | 1 |
| hsa-miR-3648 NM_0011724 EFHC1  | 1 |
| hsa-miR-3652 NM_0011724 EFHC1  | 1 |
| hsa-miR-3652 NM_0011724 EFHC1  | 1 |
| hsa-miR-3660 NM_0011724 EFHC1  | 1 |
| hsa-miR-3664 NM_0011724 EFHC1  | 1 |
| hsa-miR-3667 NM_0011724 EFHC1  | 1 |
| hsa-miR-3667 NM_0011724 EFHC1  | 1 |
| hsa-miR-3671 NM_0011724 EFHC1  | 1 |
| hsa-miR-3682 NM_0011724 EFHC1  | 1 |
| hsa-miR-3685 NM_0011724 EFHC1  | 1 |
| hsa-miR-3688 NM_0011724 EFHC1  | 1 |
| hsa-miR-3180 NM_0011724 EFHC1  | 1 |
| hsa-miR-3907 NM_0011724 EFHC1  | 1 |
| hsa-miR-3909 NM_0011724 EFHC1  | 1 |
| hsa-miR-3911 NM_0011724 EFHC1  | 1 |
| hsa-miR-3917 NM_0011724 EFHC1  | 1 |
| hsa-miR-3150 NM_0011724 EFHC1  | 1 |
| hsa-miR-3926 NM_0011724 EFHC1  | 1 |
| hsa-miR-676-1 NM_0011724 EFHC1 | 1 |
| hsa-miR-3944 NM_0011724 EFHC1  | 1 |
| hsa-miR-642b NM_0011724 EFHC1  | 1 |
| hsa-miR-1268 NM_0011724 EFHC1  | 1 |
| hsa-miR-4421 NM_0011724 EFHC1  | 1 |
| hsa-miR-378g NM_0011724 EFHC1  | 1 |
| hsa-miR-4425 NM_0011724 EFHC1  | 1 |
| hsa-miR-4428 NM_0011724 EFHC1  | 1 |
| hsa-miR-4429 NM_0011724 EFHC1  | 1 |
| hsa-miR-4433 NM_0011724 EFHC1  | 1 |
| hsa-miR-4435 NM_0011724 EFHC1  | 1 |
| hsa-miR-4437 NM_0011724 EFHC1  | 1 |
| hsa-miR-4437 NM_0011724 EFHC1  | 1 |
| hsa-miR-4440 NM_0011724 EFHC1  | 1 |
| hsa-miR-4440 NM_0011724 EFHC1  | 1 |
| hsa-miR-4444 NM_0011724 EFHC1  | 1 |
| hsa-miR-4446 NM_0011724 EFHC1  | 1 |
| hsa-miR-4446 NM_0011724 EFHC1  | 1 |
| hsa-miR-4446 NM_0011724 EFHC1  | 1 |
| hsa-miR-4447 NM_0011724 EFHC1  | 1 |
| hsa-miR-4447 NM_0011724 EFHC1  | 1 |
| hsa-miR-4449 NM_0011724 EFHC1  | 1 |
| hsa-miR-4453 NM_0011724 EFHC1  | 1 |
| hsa-miR-4456 NM_0011724 EFHC1  | 1 |
| hsa-miR-378h NM_0011724 EFHC1  | 1 |
| hsa-miR-3135 NM_0011724 EFHC1  | 1 |
| hsa-miR-548a NM_0011724 EFHC1  | 1 |
| hsa-miR-4465 NM_0011724 EFHC1  | 1 |
| hsa-miR-4474 NM_0011724 EFHC1  | 1 |
| hsa-miR-3689 NM_0011724 EFHC1  | 1 |
| hsa-miR-3689 NM_0011724 EFHC1  | 1 |
| hsa-miR-3155 NM_0011724 EFHC1  | 1 |
| hsa-miR-3155 NM_0011724 EFHC1  | 1 |
| hsa-miR-4480 NM_0011724 EFHC1  | 1 |
| hsa-miR-4480 NM_0011724 EFHC1  | 1 |
| hsa-miR-4481 NM_0011724 EFHC1  | 1 |
| hsa-miR-4482 NM_0011724 EFHC1  | 1 |
| hsa-miR-4482 NM_0011724 EFHC1  | 1 |
| hsa-miR-4483 NM_0011724 EFHC1  | 1 |
| hsa-miR-4489 NM_0011724 EFHC1  | 1 |
| hsa-miR-4489 NM_0011724 EFHC1  | 1 |
| hsa-miR-4489 NM_0011724 EFHC1  | 1 |
| hsa-miR-4490 NM_0011724 EFHC1  | 1 |
| hsa-miR-4492 NM_0011724 EFHC1  | 1 |
| hsa-miR-4502 NM_0011724 EFHC1  | 1 |
| hsa-miR-2392 NM_0011724 EFHC1  | 1 |
| hsa-miR-2392 NM_0011724 EFHC1  | 1 |
| hsa-miR-4512 NM_0011724 EFHC1  | 1 |
| hsa-miR-4513 NM_0011724 EFHC1  | 1 |
| hsa-miR-4518 NM_0011724 EFHC1  | 1 |
| hsa-miR-4520 NM_0011724 EFHC1  | 1 |
| hsa-miR-4524 NM_0011724 EFHC1  | 1 |
| hsa-miR-4530 NM_0011724 EFHC1  | 1 |
| hsa-miR-4530 NM_0011724 EFHC1  | 1 |
| hsa-miR-4530 NM_0011724 EFHC1  | 1 |
| hsa-miR-4533 NM_0011724 EFHC1  | 1 |
| hsa-miR-1587 NM_0011724 EFHC1  | 1 |
| hsa-miR-4539 NM_0011724 EFHC1  | 1 |
| hsa-miR-4540 NM_0011724 EFHC1  | 1 |
| hsa-miR-4632 NM_0011724 EFHC1  | 1 |
| hsa-miR-4633 NM_0011724 EFHC1  | 1 |
| hsa-miR-4634 NM_0011724 EFHC1  | 1 |
| hsa-miR-4638 NM_0011724 EFHC1  | 1 |
| hsa-miR-4640 NM_0011724 EFHC1  | 1 |
| hsa-miR-4642 NM_0011724 EFHC1  | 1 |
| hsa-miR-4644 NM_0011724 EFHC1  | 1 |









|                                 |            |
|---------------------------------|------------|
| hsa-miR-711C NM_0011724 EFHC1   | 1          |
| hsa-miR-711C NM_0011724 EFHC1   | 1          |
| hsa-miR-7111 NM_0011724 EFHC1   | 1          |
| hsa-miR-7112 NM_0011724 EFHC1   | 1          |
| hsa-miR-7113 NM_0011724 EFHC1   | 1          |
| hsa-miR-7114 NM_0011724 EFHC1   | 1          |
| hsa-miR-7151 NM_0011724 EFHC1   | 1          |
| hsa-miR-7154 NM_0011724 EFHC1   | 1          |
| hsa-miR-7155 NM_0011724 EFHC1   | 1          |
| hsa-miR-7158 NM_0011724 EFHC1   | 1          |
| hsa-miR-7162 NM_0011724 EFHC1   | 1          |
| hsa-miR-7704 NM_0011724 EFHC1   | 1          |
| hsa-miR-7704 NM_0011724 EFHC1   | 1          |
| hsa-miR-7843 NM_0011724 EFHC1   | 1          |
| hsa-miR-1273 NM_0011724 EFHC1   | 1          |
| hsa-miR-7845 NM_0011724 EFHC1   | 1          |
| hsa-miR-7854 NM_0011724 EFHC1   | 1          |
| hsa-miR-548t NM_0011724 EFHC1   | 1          |
| hsa-miR-8052 NM_0011724 EFHC1   | 1          |
| hsa-miR-8055 NM_0011724 EFHC1   | 1          |
| hsa-miR-8063 NM_0011724 EFHC1   | 1          |
| hsa-miR-8064 NM_0011724 EFHC1   | 1          |
| hsa-miR-8065 NM_0011724 EFHC1   | 1          |
| hsa-miR-8065 NM_0011724 EFHC1   | 1          |
| hsa-miR-8075 NM_0011724 EFHC1   | 1          |
| hsa-miR-8077 NM_0011724 EFHC1   | 1          |
| hsa-miR-8082 NM_0011724 EFHC1   | 1          |
| hsa-miR-8085 NM_0011724 EFHC1   | 1          |
| hsa-miR-9718 NM_0011724 EFHC1   | 1          |
| hsa-miR-9895 NM_0011724 EFHC1   | 1          |
| hsa-miR-9895 NM_0011724 EFHC1   | 1          |
| hsa-miR-9902 NM_0011724 EFHC1   | 1          |
| hsa-miR-1022 NM_0011724 EFHC1   | 1          |
| hsa-miR-1022 NM_0011724 EFHC1   | 1          |
| hsa-miR-1035 NM_0011724 EFHC1   | 1          |
| hsa-miR-1035 NM_0011724 EFHC1   | 1          |
| hsa-miR-104C NM_0011724 EFHC1   | 1          |
| hsa-miR-1035 NM_0011724 EFHC1   | 1          |
| hsa-miR-1052 NM_0011724 EFHC1   | 1          |
| hsa-miR-1135 NM_0011724 EFHC1   | 1          |
| hsa-miR-114C NM_0011724 EFHC1   | 1          |
| hsa-miR-114C NM_0011724 EFHC1   | 1          |
| hsa-miR-3055 NM_0011724 EFHC1   | 1          |
| hsa-miR-9851 NM_0011724 EFHC1   | 1          |
| hsa-miR-1211 NM_0011724 EFHC1   | 1          |
| hsa-miR-1211 NM_0011724 EFHC1   | 1          |
| hsa-miR-1211 NM_0011724 EFHC1   | 1          |
| hsa-miR-1212 NM_0011724 EFHC1   | 1          |
| hsa-miR-548t NM_017784 OSBPL10  | 0.95384615 |
| hsa-miR-548a NM_017784 OSBPL10  | 0.95384615 |
| hsa-miR-4693 NM_017784 OSBPL10  | 0.95384615 |
| hsa-miR-8085 NM_017784 OSBPL10  | 0.95384615 |
| hsa-miR-1304 NM_0011740 OSBPL10 | 0.95384615 |
| hsa-miR-8085 NM_0011740 OSBPL10 | 0.95384615 |
| hsa-miR-135t NM_017784 OSBPL10  | 0.96153846 |
| hsa-miR-520t NM_017784 OSBPL10  | 0.96153846 |
| hsa-miR-519a NM_017784 OSBPL10  | 0.96153846 |
| hsa-miR-320t NM_017784 OSBPL10  | 0.96153846 |
| hsa-miR-4514 NM_017784 OSBPL10  | 0.96153846 |
| hsa-miR-674C NM_017784 OSBPL10  | 0.96153846 |
| hsa-miR-6857 NM_017784 OSBPL10  | 0.96153846 |
| hsa-miR-135t NM_0011740 OSBPL10 | 0.96153846 |
| hsa-miR-520t NM_0011740 OSBPL10 | 0.96153846 |
| hsa-miR-519a NM_0011740 OSBPL10 | 0.96153846 |
| hsa-miR-320t NM_0011740 OSBPL10 | 0.96153846 |
| hsa-miR-513t NM_0011740 OSBPL10 | 0.96153846 |
| hsa-miR-3685 NM_0011740 OSBPL10 | 0.96153846 |
| hsa-miR-4756 NM_0011740 OSBPL10 | 0.96153846 |
| hsa-miR-674C NM_0011740 OSBPL10 | 0.96153846 |
| hsa-miR-6857 NM_0011740 OSBPL10 | 0.96153846 |
| hsa-miR-4287 NM_017784 OSBPL10  | 0.97435897 |
| hsa-miR-6793 NM_017784 OSBPL10  | 0.98076923 |
| hsa-miR-513t NM_0011740 OSBPL10 | 0.98076923 |
| hsa-miR-24-3j NM_017784 OSBPL10 | 1          |
| hsa-miR-93-3j NM_017784 OSBPL10 | 1          |
| hsa-miR-96-3j NM_017784 OSBPL10 | 1          |
| hsa-miR-103a NM_017784 OSBPL10  | 1          |
| hsa-miR-215- NM_017784 OSBPL10  | 1          |
| hsa-miR-124- NM_017784 OSBPL10  | 1          |
| hsa-miR-152- NM_017784 OSBPL10  | 1          |
| hsa-miR-134- NM_017784 OSBPL10  | 1          |
| hsa-miR-134- NM_017784 OSBPL10  | 1          |
| hsa-miR-320a NM_017784 OSBPL10  | 1          |
| hsa-miR-301a NM_017784 OSBPL10  | 1          |
| hsa-miR-302t NM_017784 OSBPL10  | 1          |
| hsa-miR-338- NM_017784 OSBPL10  | 1          |
| hsa-miR-485- NM_017784 OSBPL10  | 1          |
| hsa-miR-493- NM_017784 OSBPL10  | 1          |
| hsa-miR-432- NM_017784 OSBPL10  | 1          |
| hsa-miR-520a NM_017784 OSBPL10  | 1          |

|                        |         |   |
|------------------------|---------|---|
| hsa-miR-502-NM_017784  | OSBPL10 | 1 |
| hsa-miR-514a NM_017784 | OSBPL10 | 1 |
| hsa-miR-557 NM_017784  | OSBPL10 | 1 |
| hsa-miR-574-NM_017784  | OSBPL10 | 1 |
| hsa-miR-587 NM_017784  | OSBPL10 | 1 |
| hsa-miR-758-NM_017784  | OSBPL10 | 1 |
| hsa-miR-320b NM_017784 | OSBPL10 | 1 |
| hsa-miR-769-NM_017784  | OSBPL10 | 1 |
| hsa-miR-1185 NM_017784 | OSBPL10 | 1 |
| hsa-miR-1298 NM_017784 | OSBPL10 | 1 |
| hsa-miR-675-NM_017784  | OSBPL10 | 1 |
| hsa-miR-921 NM_017784  | OSBPL10 | 1 |
| hsa-miR-936 NM_017784  | OSBPL10 | 1 |
| hsa-miR-942-NM_017784  | OSBPL10 | 1 |
| hsa-miR-1303 NM_017784 | OSBPL10 | 1 |
| hsa-miR-1321 NM_017784 | OSBPL10 | 1 |
| hsa-miR-1321 NM_017784 | OSBPL10 | 1 |
| hsa-miR-103b NM_017784 | OSBPL10 | 1 |
| hsa-miR-2116 NM_017784 | OSBPL10 | 1 |
| hsa-miR-3131 NM_017784 | OSBPL10 | 1 |
| hsa-miR-544b NM_017784 | OSBPL10 | 1 |
| hsa-miR-3141 NM_017784 | OSBPL10 | 1 |
| hsa-miR-3156 NM_017784 | OSBPL10 | 1 |
| hsa-miR-3165 NM_017784 | OSBPL10 | 1 |
| hsa-miR-3065 NM_017784 | OSBPL10 | 1 |
| hsa-miR-4296 NM_017784 | OSBPL10 | 1 |
| hsa-miR-4323 NM_017784 | OSBPL10 | 1 |
| hsa-miR-4291 NM_017784 | OSBPL10 | 1 |
| hsa-miR-3688 NM_017784 | OSBPL10 | 1 |
| hsa-miR-3689 NM_017784 | OSBPL10 | 1 |
| hsa-miR-3916 NM_017784 | OSBPL10 | 1 |
| hsa-miR-3929 NM_017784 | OSBPL10 | 1 |
| hsa-miR-4436 NM_017784 | OSBPL10 | 1 |
| hsa-miR-4462 NM_017784 | OSBPL10 | 1 |
| hsa-miR-4472 NM_017784 | OSBPL10 | 1 |
| hsa-miR-4475 NM_017784 | OSBPL10 | 1 |
| hsa-miR-3689 NM_017784 | OSBPL10 | 1 |
| hsa-miR-3689 NM_017784 | OSBPL10 | 1 |
| hsa-miR-4491 NM_017784 | OSBPL10 | 1 |
| hsa-miR-4521 NM_017784 | OSBPL10 | 1 |
| hsa-miR-4530 NM_017784 | OSBPL10 | 1 |
| hsa-miR-4534 NM_017784 | OSBPL10 | 1 |
| hsa-miR-3977 NM_017784 | OSBPL10 | 1 |
| hsa-miR-4647 NM_017784 | OSBPL10 | 1 |
| hsa-miR-4647 NM_017784 | OSBPL10 | 1 |
| hsa-miR-4713 NM_017784 | OSBPL10 | 1 |
| hsa-miR-4722 NM_017784 | OSBPL10 | 1 |
| hsa-miR-4742 NM_017784 | OSBPL10 | 1 |
| hsa-miR-4748 NM_017784 | OSBPL10 | 1 |
| hsa-miR-499b NM_017784 | OSBPL10 | 1 |
| hsa-miR-4761 NM_017784 | OSBPL10 | 1 |
| hsa-miR-4764 NM_017784 | OSBPL10 | 1 |
| hsa-miR-4778 NM_017784 | OSBPL10 | 1 |
| hsa-miR-4779 NM_017784 | OSBPL10 | 1 |
| hsa-miR-2467 NM_017784 | OSBPL10 | 1 |
| hsa-miR-4797 NM_017784 | OSBPL10 | 1 |
| hsa-miR-4804 NM_017784 | OSBPL10 | 1 |
| hsa-miR-5094 NM_017784 | OSBPL10 | 1 |
| hsa-miR-5189 NM_017784 | OSBPL10 | 1 |
| hsa-miR-5689 NM_017784 | OSBPL10 | 1 |
| hsa-miR-6076 NM_017784 | OSBPL10 | 1 |
| hsa-miR-6127 NM_017784 | OSBPL10 | 1 |
| hsa-miR-6132 NM_017784 | OSBPL10 | 1 |
| hsa-miR-6508 NM_017784 | OSBPL10 | 1 |
| hsa-miR-6716 NM_017784 | OSBPL10 | 1 |
| hsa-miR-6740 NM_017784 | OSBPL10 | 1 |
| hsa-miR-6754 NM_017784 | OSBPL10 | 1 |
| hsa-miR-6755 NM_017784 | OSBPL10 | 1 |
| hsa-miR-6767 NM_017784 | OSBPL10 | 1 |
| hsa-miR-6771 NM_017784 | OSBPL10 | 1 |
| hsa-miR-6782 NM_017784 | OSBPL10 | 1 |
| hsa-miR-6809 NM_017784 | OSBPL10 | 1 |
| hsa-miR-6816 NM_017784 | OSBPL10 | 1 |
| hsa-miR-6818 NM_017784 | OSBPL10 | 1 |
| hsa-miR-6821 NM_017784 | OSBPL10 | 1 |
| hsa-miR-6825 NM_017784 | OSBPL10 | 1 |
| hsa-miR-6828 NM_017784 | OSBPL10 | 1 |
| hsa-miR-6831 NM_017784 | OSBPL10 | 1 |
| hsa-miR-6833 NM_017784 | OSBPL10 | 1 |
| hsa-miR-6837 NM_017784 | OSBPL10 | 1 |
| hsa-miR-6838 NM_017784 | OSBPL10 | 1 |
| hsa-miR-6856 NM_017784 | OSBPL10 | 1 |
| hsa-miR-6862 NM_017784 | OSBPL10 | 1 |
| hsa-miR-6868 NM_017784 | OSBPL10 | 1 |
| hsa-miR-6877 NM_017784 | OSBPL10 | 1 |
| hsa-miR-6879 NM_017784 | OSBPL10 | 1 |
| hsa-miR-6884 NM_017784 | OSBPL10 | 1 |
| hsa-miR-6891 NM_017784 | OSBPL10 | 1 |
| hsa-miR-6894 NM_017784 | OSBPL10 | 1 |
| hsa-miR-7108 NM_017784 | OSBPL10 | 1 |
| hsa-miR-7849 NM_017784 | OSBPL10 | 1 |
| hsa-miR-8071 NM_017784 | OSBPL10 | 1 |
| hsa-miR-1118 NM_017784 | OSBPL10 | 1 |
| hsa-miR-1212 NM_017784 | OSBPL10 | 1 |

|                          |         |            |
|--------------------------|---------|------------|
| hsa-miR-1213 NM_017784   | OSBPL10 | 1          |
| hsa-miR-18a- NM_0011740  | OSBPL10 | 1          |
| hsa-miR-93-3j NM_0011740 | OSBPL10 | 1          |
| hsa-miR-96-3j NM_0011740 | OSBPL10 | 1          |
| hsa-miR-215- NM_0011740  | OSBPL10 | 1          |
| hsa-miR-135a NM_0011740  | OSBPL10 | 1          |
| hsa-miR-134- NM_0011740  | OSBPL10 | 1          |
| hsa-miR-134- NM_0011740  | OSBPL10 | 1          |
| hsa-miR-320a NM_0011740  | OSBPL10 | 1          |
| hsa-miR-30e- NM_0011740  | OSBPL10 | 1          |
| hsa-miR-302b NM_0011740  | OSBPL10 | 1          |
| hsa-miR-383- NM_0011740  | OSBPL10 | 1          |
| hsa-miR-483- NM_0011740  | OSBPL10 | 1          |
| hsa-miR-432- NM_0011740  | OSBPL10 | 1          |
| hsa-miR-518f NM_0011740  | OSBPL10 | 1          |
| hsa-miR-557 NM_0011740   | OSBPL10 | 1          |
| hsa-miR-587 NM_0011740   | OSBPL10 | 1          |
| hsa-miR-758- NM_0011740  | OSBPL10 | 1          |
| hsa-miR-320b NM_0011740  | OSBPL10 | 1          |
| hsa-miR-1185 NM_0011740  | OSBPL10 | 1          |
| hsa-miR-1298 NM_0011740  | OSBPL10 | 1          |
| hsa-miR-2113 NM_0011740  | OSBPL10 | 1          |
| hsa-miR-675- NM_0011740  | OSBPL10 | 1          |
| hsa-miR-744- NM_0011740  | OSBPL10 | 1          |
| hsa-miR-942- NM_0011740  | OSBPL10 | 1          |
| hsa-miR-1225 NM_0011740  | OSBPL10 | 1          |
| hsa-miR-1303 NM_0011740  | OSBPL10 | 1          |
| hsa-miR-1261 NM_0011740  | OSBPL10 | 1          |
| hsa-miR-1321 NM_0011740  | OSBPL10 | 1          |
| hsa-miR-1912 NM_0011740  | OSBPL10 | 1          |
| hsa-miR-3131 NM_0011740  | OSBPL10 | 1          |
| hsa-miR-3156 NM_0011740  | OSBPL10 | 1          |
| hsa-miR-4296 NM_0011740  | OSBPL10 | 1          |
| hsa-miR-4291 NM_0011740  | OSBPL10 | 1          |
| hsa-miR-3612 NM_0011740  | OSBPL10 | 1          |
| hsa-miR-3688 NM_0011740  | OSBPL10 | 1          |
| hsa-miR-3685 NM_0011740  | OSBPL10 | 1          |
| hsa-miR-3916 NM_0011740  | OSBPL10 | 1          |
| hsa-miR-4455 NM_0011740  | OSBPL10 | 1          |
| hsa-miR-4462 NM_0011740  | OSBPL10 | 1          |
| hsa-miR-4472 NM_0011740  | OSBPL10 | 1          |
| hsa-miR-4475 NM_0011740  | OSBPL10 | 1          |
| hsa-miR-4491 NM_0011740  | OSBPL10 | 1          |
| hsa-miR-3977 NM_0011740  | OSBPL10 | 1          |
| hsa-miR-4647 NM_0011740  | OSBPL10 | 1          |
| hsa-miR-4676 NM_0011740  | OSBPL10 | 1          |
| hsa-miR-4713 NM_0011740  | OSBPL10 | 1          |
| hsa-miR-4731 NM_0011740  | OSBPL10 | 1          |
| hsa-miR-4742 NM_0011740  | OSBPL10 | 1          |
| hsa-miR-499b NM_0011740  | OSBPL10 | 1          |
| hsa-miR-4764 NM_0011740  | OSBPL10 | 1          |
| hsa-miR-4778 NM_0011740  | OSBPL10 | 1          |
| hsa-miR-4775 NM_0011740  | OSBPL10 | 1          |
| hsa-miR-2467 NM_0011740  | OSBPL10 | 1          |
| hsa-miR-664b NM_0011740  | OSBPL10 | 1          |
| hsa-miR-5685 NM_0011740  | OSBPL10 | 1          |
| hsa-miR-5693 NM_0011740  | OSBPL10 | 1          |
| hsa-miR-5698 NM_0011740  | OSBPL10 | 1          |
| hsa-miR-6127 NM_0011740  | OSBPL10 | 1          |
| hsa-miR-6716 NM_0011740  | OSBPL10 | 1          |
| hsa-miR-674C NM_0011740  | OSBPL10 | 1          |
| hsa-miR-6754 NM_0011740  | OSBPL10 | 1          |
| hsa-miR-6767 NM_0011740  | OSBPL10 | 1          |
| hsa-miR-679C NM_0011740  | OSBPL10 | 1          |
| hsa-miR-6805 NM_0011740  | OSBPL10 | 1          |
| hsa-miR-6818 NM_0011740  | OSBPL10 | 1          |
| hsa-miR-6821 NM_0011740  | OSBPL10 | 1          |
| hsa-miR-6831 NM_0011740  | OSBPL10 | 1          |
| hsa-miR-6838 NM_0011740  | OSBPL10 | 1          |
| hsa-miR-6856 NM_0011740  | OSBPL10 | 1          |
| hsa-miR-6873 NM_0011740  | OSBPL10 | 1          |
| hsa-miR-6884 NM_0011740  | OSBPL10 | 1          |
| hsa-miR-6894 NM_0011740  | OSBPL10 | 1          |
| hsa-miR-7108 NM_0011740  | OSBPL10 | 1          |
| hsa-miR-7845 NM_0011740  | OSBPL10 | 1          |
| hsa-miR-8071 NM_0011740  | OSBPL10 | 1          |
| hsa-miR-1022 NM_0011740  | OSBPL10 | 1          |
| hsa-miR-1212 NM_0011740  | OSBPL10 | 1          |
| hsa-miR-1213 NM_0011740  | OSBPL10 | 1          |
| hsa-miR-4781 NM_005823   | MSLN    | 1          |
| hsa-miR-6726 NM_005823   | MSLN    | 1          |
| hsa-miR-6755 NM_005823   | MSLN    | 1          |
| hsa-miR-20b- NM_013404   | MSLN    | 1          |
| hsa-miR-1205 NM_013404   | MSLN    | 1          |
| hsa-miR-4781 NM_013404   | MSLN    | 1          |
| hsa-miR-6726 NM_013404   | MSLN    | 1          |
| hsa-miR-4781 NM_0011773  | MSLN    | 1          |
| hsa-miR-6726 NM_0011773  | MSLN    | 1          |
| hsa-miR-6755 NM_0011773  | MSLN    | 1          |
| hsa-miR-3907 NM_001770   | CD19    | 0.96153846 |
| hsa-miR-3907 NM_0011780  | CD19    | 0.96153846 |
| hsa-miR-107 NM_001770    | CD19    | 1          |
| hsa-miR-200b NM_001770   | CD19    | 1          |
| hsa-miR-520a NM_001770   | CD19    | 1          |

|               |            |        |            |
|---------------|------------|--------|------------|
| hsa-miR-525-  | NM_001770  | CD19   | 1          |
| hsa-miR-518f  | NM_001770  | CD19   | 1          |
| hsa-miR-508-  | NM_001770  | CD19   | 1          |
| hsa-miR-589-  | NM_001770  | CD19   | 1          |
| hsa-miR-1294  | NM_001770  | CD19   | 1          |
| hsa-miR-211c  | NM_001770  | CD19   | 1          |
| hsa-miR-2276  | NM_001770  | CD19   | 1          |
| hsa-miR-544b  | NM_001770  | CD19   | 1          |
| hsa-miR-3144  | NM_001770  | CD19   | 1          |
| hsa-miR-4298  | NM_001770  | CD19   | 1          |
| hsa-miR-3684  | NM_001770  | CD19   | 1          |
| hsa-miR-4437  | NM_001770  | CD19   | 1          |
| hsa-miR-445c  | NM_001770  | CD19   | 1          |
| hsa-miR-4458  | NM_001770  | CD19   | 1          |
| hsa-miR-3135  | NM_001770  | CD19   | 1          |
| hsa-miR-4474  | NM_001770  | CD19   | 1          |
| hsa-miR-4526  | NM_001770  | CD19   | 1          |
| hsa-miR-4652  | NM_001770  | CD19   | 1          |
| hsa-miR-4667  | NM_001770  | CD19   | 1          |
| hsa-miR-4697  | NM_001770  | CD19   | 1          |
| hsa-miR-4736  | NM_001770  | CD19   | 1          |
| hsa-miR-4768  | NM_001770  | CD19   | 1          |
| hsa-miR-5187  | NM_001770  | CD19   | 1          |
| hsa-miR-6074  | NM_001770  | CD19   | 1          |
| hsa-miR-6506  | NM_001770  | CD19   | 1          |
| hsa-miR-6796  | NM_001770  | CD19   | 1          |
| hsa-miR-6857  | NM_001770  | CD19   | 1          |
| hsa-miR-6873  | NM_001770  | CD19   | 1          |
| hsa-miR-6888  | NM_001770  | CD19   | 1          |
| hsa-miR-6888  | NM_001770  | CD19   | 1          |
| hsa-miR-7106  | NM_001770  | CD19   | 1          |
| hsa-miR-7109  | NM_001770  | CD19   | 1          |
| hsa-miR-7111  | NM_001770  | CD19   | 1          |
| hsa-miR-716c  | NM_001770  | CD19   | 1          |
| hsa-miR-8071  | NM_001770  | CD19   | 1          |
| hsa-miR-8485  | NM_001770  | CD19   | 1          |
| hsa-miR-1052  | NM_001770  | CD19   | 1          |
| hsa-miR-1212  | NM_001770  | CD19   | 1          |
| hsa-miR-107   | NM_0011780 | CD19   | 1          |
| hsa-miR-200b  | NM_0011780 | CD19   | 1          |
| hsa-miR-520a  | NM_0011780 | CD19   | 1          |
| hsa-miR-525-  | NM_0011780 | CD19   | 1          |
| hsa-miR-518f  | NM_0011780 | CD19   | 1          |
| hsa-miR-508-  | NM_0011780 | CD19   | 1          |
| hsa-miR-589-  | NM_0011780 | CD19   | 1          |
| hsa-miR-1294  | NM_0011780 | CD19   | 1          |
| hsa-miR-211c  | NM_0011780 | CD19   | 1          |
| hsa-miR-2276  | NM_0011780 | CD19   | 1          |
| hsa-miR-544b  | NM_0011780 | CD19   | 1          |
| hsa-miR-3144  | NM_0011780 | CD19   | 1          |
| hsa-miR-4298  | NM_0011780 | CD19   | 1          |
| hsa-miR-3684  | NM_0011780 | CD19   | 1          |
| hsa-miR-4437  | NM_0011780 | CD19   | 1          |
| hsa-miR-445c  | NM_0011780 | CD19   | 1          |
| hsa-miR-4458  | NM_0011780 | CD19   | 1          |
| hsa-miR-3135  | NM_0011780 | CD19   | 1          |
| hsa-miR-4474  | NM_0011780 | CD19   | 1          |
| hsa-miR-4526  | NM_0011780 | CD19   | 1          |
| hsa-miR-4652  | NM_0011780 | CD19   | 1          |
| hsa-miR-4667  | NM_0011780 | CD19   | 1          |
| hsa-miR-4697  | NM_0011780 | CD19   | 1          |
| hsa-miR-4736  | NM_0011780 | CD19   | 1          |
| hsa-miR-4768  | NM_0011780 | CD19   | 1          |
| hsa-miR-5187  | NM_0011780 | CD19   | 1          |
| hsa-miR-6074  | NM_0011780 | CD19   | 1          |
| hsa-miR-6506  | NM_0011780 | CD19   | 1          |
| hsa-miR-6775  | NM_0011780 | CD19   | 1          |
| hsa-miR-6796  | NM_0011780 | CD19   | 1          |
| hsa-miR-6873  | NM_0011780 | CD19   | 1          |
| hsa-miR-6888  | NM_0011780 | CD19   | 1          |
| hsa-miR-6888  | NM_0011780 | CD19   | 1          |
| hsa-miR-7106  | NM_0011780 | CD19   | 1          |
| hsa-miR-7111  | NM_0011780 | CD19   | 1          |
| hsa-miR-716c  | NM_0011780 | CD19   | 1          |
| hsa-miR-8071  | NM_0011780 | CD19   | 1          |
| hsa-miR-8485  | NM_0011780 | CD19   | 1          |
| hsa-miR-1052  | NM_0011780 | CD19   | 1          |
| hsa-miR-1212  | NM_0011780 | CD19   | 1          |
| hsa-miR-216a  | NM_001676  | ATP12A | 0.96153846 |
| hsa-miR-331-  | NM_001676  | ATP12A | 0.96153846 |
| hsa-miR-331-  | NM_0011850 | ATP12A | 0.96153846 |
| hsa-miR-6717  | NM_0011850 | ATP12A | 0.96923077 |
| hsa-miR-1211  | NM_0011850 | ATP12A | 0.96923077 |
| hsa-miR-607c  | NM_001676  | ATP12A | 0.97435897 |
| hsa-miR-607c  | NM_0011850 | ATP12A | 0.97435897 |
| hsa-miR-6501  | NM_0011850 | ATP12A | 0.97435897 |
| hsa-miR-4701  | NM_001676  | ATP12A | 0.98076923 |
| hsa-miR-4701  | NM_0011850 | ATP12A | 0.98076923 |
| hsa-miR-185-  | NM_0011850 | ATP12A | 0.99145299 |
| hsa-let-7d-3p | NM_001676  | ATP12A | 1          |
| hsa-miR-24-3j | NM_001676  | ATP12A | 1          |
| hsa-miR-148a  | NM_001676  | ATP12A | 1          |
| hsa-miR-204-  | NM_001676  | ATP12A | 1          |
| hsa-miR-23b-  | NM_001676  | ATP12A | 1          |

|              |           |        |   |
|--------------|-----------|--------|---|
| hsa-miR-125t | NM_001676 | ATP12A | 1 |
| hsa-miR-125a | NM_001676 | ATP12A | 1 |
| hsa-miR-150- | NM_001676 | ATP12A | 1 |
| hsa-miR-370- | NM_001676 | ATP12A | 1 |
| hsa-miR-371a | NM_001676 | ATP12A | 1 |
| hsa-miR-422a | NM_001676 | ATP12A | 1 |
| hsa-miR-431- | NM_001676 | ATP12A | 1 |
| hsa-miR-431- | NM_001676 | ATP12A | 1 |
| hsa-miR-329- | NM_001676 | ATP12A | 1 |
| hsa-miR-202- | NM_001676 | ATP12A | 1 |
| hsa-miR-432- | NM_001676 | ATP12A | 1 |
| hsa-miR-523- | NM_001676 | ATP12A | 1 |
| hsa-miR-503- | NM_001676 | ATP12A | 1 |
| hsa-miR-513a | NM_001676 | ATP12A | 1 |
| hsa-miR-574- | NM_001676 | ATP12A | 1 |
| hsa-miR-575  | NM_001676 | ATP12A | 1 |
| hsa-miR-596  | NM_001676 | ATP12A | 1 |
| hsa-miR-610  | NM_001676 | ATP12A | 1 |
| hsa-miR-620  | NM_001676 | ATP12A | 1 |
| hsa-miR-623  | NM_001676 | ATP12A | 1 |
| hsa-miR-659- | NM_001676 | ATP12A | 1 |
| hsa-miR-1301 | NM_001676 | ATP12A | 1 |
| hsa-miR-1298 | NM_001676 | ATP12A | 1 |
| hsa-miR-2113 | NM_001676 | ATP12A | 1 |
| hsa-miR-216t | NM_001676 | ATP12A | 1 |
| hsa-miR-208t | NM_001676 | ATP12A | 1 |
| hsa-miR-1178 | NM_001676 | ATP12A | 1 |
| hsa-miR-1178 | NM_001676 | ATP12A | 1 |
| hsa-miR-1182 | NM_001676 | ATP12A | 1 |
| hsa-miR-1238 | NM_001676 | ATP12A | 1 |
| hsa-miR-1207 | NM_001676 | ATP12A | 1 |
| hsa-miR-1304 | NM_001676 | ATP12A | 1 |
| hsa-miR-1263 | NM_001676 | ATP12A | 1 |
| hsa-miR-513t | NM_001676 | ATP12A | 1 |
| hsa-miR-1322 | NM_001676 | ATP12A | 1 |
| hsa-miR-2276 | NM_001676 | ATP12A | 1 |
| hsa-miR-711  | NM_001676 | ATP12A | 1 |
| hsa-miR-3127 | NM_001676 | ATP12A | 1 |
| hsa-miR-544t | NM_001676 | ATP12A | 1 |
| hsa-miR-3142 | NM_001676 | ATP12A | 1 |
| hsa-miR-3158 | NM_001676 | ATP12A | 1 |
| hsa-miR-317C | NM_001676 | ATP12A | 1 |
| hsa-miR-3193 | NM_001676 | ATP12A | 1 |
| hsa-miR-4324 | NM_001676 | ATP12A | 1 |
| hsa-miR-4278 | NM_001676 | ATP12A | 1 |
| hsa-miR-4278 | NM_001676 | ATP12A | 1 |
| hsa-miR-3622 | NM_001676 | ATP12A | 1 |
| hsa-miR-366C | NM_001676 | ATP12A | 1 |
| hsa-miR-3679 | NM_001676 | ATP12A | 1 |
| hsa-miR-368C | NM_001676 | ATP12A | 1 |
| hsa-miR-550t | NM_001676 | ATP12A | 1 |
| hsa-miR-4418 | NM_001676 | ATP12A | 1 |
| hsa-miR-4422 | NM_001676 | ATP12A | 1 |
| hsa-miR-445C | NM_001676 | ATP12A | 1 |
| hsa-miR-4471 | NM_001676 | ATP12A | 1 |
| hsa-miR-4488 | NM_001676 | ATP12A | 1 |
| hsa-miR-4538 | NM_001676 | ATP12A | 1 |
| hsa-miR-4644 | NM_001676 | ATP12A | 1 |
| hsa-miR-4646 | NM_001676 | ATP12A | 1 |
| hsa-miR-4647 | NM_001676 | ATP12A | 1 |
| hsa-miR-465C | NM_001676 | ATP12A | 1 |
| hsa-miR-4651 | NM_001676 | ATP12A | 1 |
| hsa-miR-4653 | NM_001676 | ATP12A | 1 |
| hsa-miR-4655 | NM_001676 | ATP12A | 1 |
| hsa-miR-4662 | NM_001676 | ATP12A | 1 |
| hsa-miR-4689 | NM_001676 | ATP12A | 1 |
| hsa-miR-4717 | NM_001676 | ATP12A | 1 |
| hsa-miR-4754 | NM_001676 | ATP12A | 1 |
| hsa-miR-4764 | NM_001676 | ATP12A | 1 |
| hsa-miR-4779 | NM_001676 | ATP12A | 1 |
| hsa-miR-501C | NM_001676 | ATP12A | 1 |
| hsa-miR-510C | NM_001676 | ATP12A | 1 |
| hsa-miR-5579 | NM_001676 | ATP12A | 1 |
| hsa-miR-5584 | NM_001676 | ATP12A | 1 |
| hsa-miR-5685 | NM_001676 | ATP12A | 1 |
| hsa-miR-6131 | NM_001676 | ATP12A | 1 |
| hsa-miR-6165 | NM_001676 | ATP12A | 1 |
| hsa-miR-6501 | NM_001676 | ATP12A | 1 |
| hsa-miR-6515 | NM_001676 | ATP12A | 1 |
| hsa-miR-6721 | NM_001676 | ATP12A | 1 |
| hsa-miR-6734 | NM_001676 | ATP12A | 1 |
| hsa-miR-6748 | NM_001676 | ATP12A | 1 |
| hsa-miR-6773 | NM_001676 | ATP12A | 1 |
| hsa-miR-6775 | NM_001676 | ATP12A | 1 |
| hsa-miR-6777 | NM_001676 | ATP12A | 1 |
| hsa-miR-6783 | NM_001676 | ATP12A | 1 |
| hsa-miR-6788 | NM_001676 | ATP12A | 1 |
| hsa-miR-6801 | NM_001676 | ATP12A | 1 |
| hsa-miR-6811 | NM_001676 | ATP12A | 1 |
| hsa-miR-6816 | NM_001676 | ATP12A | 1 |
| hsa-miR-6824 | NM_001676 | ATP12A | 1 |
| hsa-miR-6834 | NM_001676 | ATP12A | 1 |
| hsa-miR-6834 | NM_001676 | ATP12A | 1 |
| hsa-miR-678C | NM_001676 | ATP12A | 1 |

|                          |        |   |
|--------------------------|--------|---|
| hsa-miR-6853 NM_001676   | ATP12A | 1 |
| hsa-miR-6863 NM_001676   | ATP12A | 1 |
| hsa-miR-6870 NM_001676   | ATP12A | 1 |
| hsa-miR-6875 NM_001676   | ATP12A | 1 |
| hsa-miR-6882 NM_001676   | ATP12A | 1 |
| hsa-miR-6893 NM_001676   | ATP12A | 1 |
| hsa-miR-711C NM_001676   | ATP12A | 1 |
| hsa-miR-7154 NM_001676   | ATP12A | 1 |
| hsa-miR-4433 NM_001676   | ATP12A | 1 |
| hsa-miR-1273 NM_001676   | ATP12A | 1 |
| hsa-miR-7851 NM_001676   | ATP12A | 1 |
| hsa-miR-8055 NM_001676   | ATP12A | 1 |
| hsa-miR-8088 NM_001676   | ATP12A | 1 |
| hsa-miR-1035 NM_001676   | ATP12A | 1 |
| hsa-miR-1035 NM_001676   | ATP12A | 1 |
| hsa-miR-1035 NM_001676   | ATP12A | 1 |
| hsa-miR-1135 NM_001676   | ATP12A | 1 |
| hsa-miR-6525 NM_001676   | ATP12A | 1 |
| hsa-let-7d-3p NM_0011850 | ATP12A | 1 |
| hsa-miR-197- NM_0011850  | ATP12A | 1 |
| hsa-miR-204- NM_0011850  | ATP12A | 1 |
| hsa-miR-219a NM_0011850  | ATP12A | 1 |
| hsa-miR-23b- NM_0011850  | ATP12A | 1 |
| hsa-miR-125b NM_0011850  | ATP12A | 1 |
| hsa-miR-125a NM_0011850  | ATP12A | 1 |
| hsa-miR-138- NM_0011850  | ATP12A | 1 |
| hsa-miR-302b NM_0011850  | ATP12A | 1 |
| hsa-miR-370- NM_0011850  | ATP12A | 1 |
| hsa-miR-371a NM_0011850  | ATP12A | 1 |
| hsa-miR-422a NM_0011850  | ATP12A | 1 |
| hsa-miR-422a NM_0011850  | ATP12A | 1 |
| hsa-miR-431- NM_0011850  | ATP12A | 1 |
| hsa-miR-431- NM_0011850  | ATP12A | 1 |
| hsa-miR-329- NM_0011850  | ATP12A | 1 |
| hsa-miR-202- NM_0011850  | ATP12A | 1 |
| hsa-miR-432- NM_0011850  | ATP12A | 1 |
| hsa-miR-432- NM_0011850  | ATP12A | 1 |
| hsa-miR-523- NM_0011850  | ATP12A | 1 |
| hsa-miR-503- NM_0011850  | ATP12A | 1 |
| hsa-miR-574- NM_0011850  | ATP12A | 1 |
| hsa-miR-575 NM_0011850   | ATP12A | 1 |
| hsa-miR-596 NM_0011850   | ATP12A | 1 |
| hsa-miR-610 NM_0011850   | ATP12A | 1 |
| hsa-miR-620 NM_0011850   | ATP12A | 1 |
| hsa-miR-623 NM_0011850   | ATP12A | 1 |
| hsa-miR-659- NM_0011850  | ATP12A | 1 |
| hsa-miR-668- NM_0011850  | ATP12A | 1 |
| hsa-miR-1298 NM_0011850  | ATP12A | 1 |
| hsa-miR-765 NM_0011850   | ATP12A | 1 |
| hsa-miR-744- NM_0011850  | ATP12A | 1 |
| hsa-miR-216b NM_0011850  | ATP12A | 1 |
| hsa-miR-208b NM_0011850  | ATP12A | 1 |
| hsa-miR-1178 NM_0011850  | ATP12A | 1 |
| hsa-miR-1178 NM_0011850  | ATP12A | 1 |
| hsa-miR-1182 NM_0011850  | ATP12A | 1 |
| hsa-miR-1182 NM_0011850  | ATP12A | 1 |
| hsa-miR-1238 NM_0011850  | ATP12A | 1 |
| hsa-miR-1295 NM_0011850  | ATP12A | 1 |
| hsa-miR-1258 NM_0011850  | ATP12A | 1 |
| hsa-miR-1263 NM_0011850  | ATP12A | 1 |
| hsa-miR-513b NM_0011850  | ATP12A | 1 |
| hsa-miR-1322 NM_0011850  | ATP12A | 1 |
| hsa-miR-3127 NM_0011850  | ATP12A | 1 |
| hsa-miR-544b NM_0011850  | ATP12A | 1 |
| hsa-miR-3141 NM_0011850  | ATP12A | 1 |
| hsa-miR-3142 NM_0011850  | ATP12A | 1 |
| hsa-miR-3150 NM_0011850  | ATP12A | 1 |
| hsa-miR-3158 NM_0011850  | ATP12A | 1 |
| hsa-miR-3170 NM_0011850  | ATP12A | 1 |
| hsa-miR-4324 NM_0011850  | ATP12A | 1 |
| hsa-miR-4257 NM_0011850  | ATP12A | 1 |
| hsa-miR-4270 NM_0011850  | ATP12A | 1 |
| hsa-miR-4278 NM_0011850  | ATP12A | 1 |
| hsa-miR-4278 NM_0011850  | ATP12A | 1 |
| hsa-miR-3660 NM_0011850  | ATP12A | 1 |
| hsa-miR-3680 NM_0011850  | ATP12A | 1 |
| hsa-miR-3934 NM_0011850  | ATP12A | 1 |
| hsa-miR-550b NM_0011850  | ATP12A | 1 |
| hsa-miR-4418 NM_0011850  | ATP12A | 1 |
| hsa-miR-4422 NM_0011850  | ATP12A | 1 |
| hsa-miR-4450 NM_0011850  | ATP12A | 1 |
| hsa-miR-4462 NM_0011850  | ATP12A | 1 |
| hsa-miR-4488 NM_0011850  | ATP12A | 1 |
| hsa-miR-4491 NM_0011850  | ATP12A | 1 |
| hsa-miR-4513 NM_0011850  | ATP12A | 1 |
| hsa-miR-4538 NM_0011850  | ATP12A | 1 |
| hsa-miR-4644 NM_0011850  | ATP12A | 1 |
| hsa-miR-4646 NM_0011850  | ATP12A | 1 |
| hsa-miR-4647 NM_0011850  | ATP12A | 1 |
| hsa-miR-4651 NM_0011850  | ATP12A | 1 |
| hsa-miR-4655 NM_0011850  | ATP12A | 1 |
| hsa-miR-4662 NM_0011850  | ATP12A | 1 |
| hsa-miR-4667 NM_0011850  | ATP12A | 1 |
| hsa-miR-4667 NM_0011850  | ATP12A | 1 |

|                                |            |
|--------------------------------|------------|
| hsa-miR-4688 NM_0011850 ATP12A | 1          |
| hsa-miR-4698 NM_0011850 ATP12A | 1          |
| hsa-miR-4717 NM_0011850 ATP12A | 1          |
| hsa-miR-4722 NM_0011850 ATP12A | 1          |
| hsa-miR-4754 NM_0011850 ATP12A | 1          |
| hsa-miR-4764 NM_0011850 ATP12A | 1          |
| hsa-miR-4765 NM_0011850 ATP12A | 1          |
| hsa-miR-5010 NM_0011850 ATP12A | 1          |
| hsa-miR-5100 NM_0011850 ATP12A | 1          |
| hsa-miR-5575 NM_0011850 ATP12A | 1          |
| hsa-miR-664b NM_0011850 ATP12A | 1          |
| hsa-miR-5584 NM_0011850 ATP12A | 1          |
| hsa-miR-5591 NM_0011850 ATP12A | 1          |
| hsa-miR-5685 NM_0011850 ATP12A | 1          |
| hsa-miR-6085 NM_0011850 ATP12A | 1          |
| hsa-miR-6131 NM_0011850 ATP12A | 1          |
| hsa-miR-6132 NM_0011850 ATP12A | 1          |
| hsa-miR-6165 NM_0011850 ATP12A | 1          |
| hsa-miR-6501 NM_0011850 ATP12A | 1          |
| hsa-miR-6514 NM_0011850 ATP12A | 1          |
| hsa-miR-6515 NM_0011850 ATP12A | 1          |
| hsa-miR-6719 NM_0011850 ATP12A | 1          |
| hsa-miR-6721 NM_0011850 ATP12A | 1          |
| hsa-miR-6734 NM_0011850 ATP12A | 1          |
| hsa-miR-6737 NM_0011850 ATP12A | 1          |
| hsa-miR-6746 NM_0011850 ATP12A | 1          |
| hsa-miR-6748 NM_0011850 ATP12A | 1          |
| hsa-miR-6754 NM_0011850 ATP12A | 1          |
| hsa-miR-6757 NM_0011850 ATP12A | 1          |
| hsa-miR-6773 NM_0011850 ATP12A | 1          |
| hsa-miR-6775 NM_0011850 ATP12A | 1          |
| hsa-miR-6777 NM_0011850 ATP12A | 1          |
| hsa-miR-6783 NM_0011850 ATP12A | 1          |
| hsa-miR-6785 NM_0011850 ATP12A | 1          |
| hsa-miR-6788 NM_0011850 ATP12A | 1          |
| hsa-miR-6801 NM_0011850 ATP12A | 1          |
| hsa-miR-6811 NM_0011850 ATP12A | 1          |
| hsa-miR-6816 NM_0011850 ATP12A | 1          |
| hsa-miR-6824 NM_0011850 ATP12A | 1          |
| hsa-miR-6834 NM_0011850 ATP12A | 1          |
| hsa-miR-6835 NM_0011850 ATP12A | 1          |
| hsa-miR-6780 NM_0011850 ATP12A | 1          |
| hsa-miR-6853 NM_0011850 ATP12A | 1          |
| hsa-miR-6854 NM_0011850 ATP12A | 1          |
| hsa-miR-6863 NM_0011850 ATP12A | 1          |
| hsa-miR-6863 NM_0011850 ATP12A | 1          |
| hsa-miR-6870 NM_0011850 ATP12A | 1          |
| hsa-miR-6882 NM_0011850 ATP12A | 1          |
| hsa-miR-6883 NM_0011850 ATP12A | 1          |
| hsa-miR-6883 NM_0011850 ATP12A | 1          |
| hsa-miR-6891 NM_0011850 ATP12A | 1          |
| hsa-miR-7110 NM_0011850 ATP12A | 1          |
| hsa-miR-7152 NM_0011850 ATP12A | 1          |
| hsa-miR-7154 NM_0011850 ATP12A | 1          |
| hsa-miR-4433 NM_0011850 ATP12A | 1          |
| hsa-miR-1273 NM_0011850 ATP12A | 1          |
| hsa-miR-7851 NM_0011850 ATP12A | 1          |
| hsa-miR-8059 NM_0011850 ATP12A | 1          |
| hsa-miR-8073 NM_0011850 ATP12A | 1          |
| hsa-miR-8085 NM_0011850 ATP12A | 1          |
| hsa-miR-8088 NM_0011850 ATP12A | 1          |
| hsa-miR-9900 NM_0011850 ATP12A | 1          |
| hsa-miR-1039 NM_0011850 ATP12A | 1          |
| hsa-miR-1039 NM_0011850 ATP12A | 1          |
| hsa-miR-1039 NM_0011850 ATP12A | 1          |
| hsa-miR-1139 NM_0011850 ATP12A | 1          |
| hsa-miR-6529 NM_0011850 ATP12A | 1          |
| hsa-miR-1213 NM_0011850 ATP12A | 1          |
| hsa-miR-4646 NM_0012784 CD22   | 0.95384615 |
| hsa-miR-4646 NM_001771 CD22    | 0.95384615 |
| hsa-miR-4646 NM_0011850 CD22   | 0.95384615 |
| hsa-miR-4646 NM_0011851 CD22   | 0.95384615 |
| hsa-miR-3154 NM_0012784 CD22   | 0.96153846 |
| hsa-miR-4492 NM_0012784 CD22   | 0.96153846 |
| hsa-miR-8060 NM_0012784 CD22   | 0.96153846 |
| hsa-miR-3154 NM_001771 CD22    | 0.96153846 |
| hsa-miR-8060 NM_001771 CD22    | 0.96153846 |
| hsa-miR-3154 NM_0011850 CD22   | 0.96153846 |
| hsa-miR-8060 NM_0011850 CD22   | 0.96153846 |
| hsa-miR-3154 NM_0011851 CD22   | 0.96153846 |
| hsa-miR-8060 NM_0011851 CD22   | 0.96153846 |
| hsa-miR-198 NM_0011851 CD22    | 0.96153846 |
| hsa-miR-365b NM_0011851 CD22   | 0.96153846 |
| hsa-miR-378b NM_0011851 CD22   | 0.96153846 |
| hsa-miR-1212 NM_0011851 CD22   | 0.96153846 |
| hsa-miR-4260 NM_0011851 CD22   | 0.96923077 |
| hsa-miR-6880 NM_0012784 CD22   | 0.97435897 |
| hsa-miR-7154 NM_0012784 CD22   | 0.97435897 |
| hsa-miR-6880 NM_001771 CD22    | 0.97435897 |
| hsa-miR-7154 NM_001771 CD22    | 0.97435897 |
| hsa-miR-4265 NM_0011850 CD22   | 0.97435897 |
| hsa-miR-6880 NM_0011850 CD22   | 0.97435897 |
| hsa-miR-7154 NM_0011850 CD22   | 0.97435897 |
| hsa-miR-377-1 NM_0011851 CD22  | 0.97435897 |



|                              |            |
|------------------------------|------------|
| hsa-miR-688C NM_0011851 CD22 | 0.97435897 |
| hsa-miR-7154 NM_0011851 CD22 | 0.97435897 |
| hsa-miR-4265 NM_0011851 CD22 | 0.97435897 |
| hsa-miR-4466 NM_0011851 CD22 | 0.97435897 |
| hsa-miR-6133 NM_0011851 CD22 | 0.97435897 |
| hsa-miR-688C NM_0011851 CD22 | 0.97435897 |
| hsa-miR-129C NM_0012784 CD22 | 0.98076923 |
| hsa-miR-6763 NM_0012784 CD22 | 0.98076923 |
| hsa-miR-8075 NM_0012784 CD22 | 0.98076923 |
| hsa-miR-129C NM_001771 CD22  | 0.98076923 |
| hsa-miR-6763 NM_001771 CD22  | 0.98076923 |
| hsa-miR-8075 NM_001771 CD22  | 0.98076923 |
| hsa-miR-129C NM_0011850 CD22 | 0.98076923 |
| hsa-miR-6763 NM_0011850 CD22 | 0.98076923 |
| hsa-miR-8075 NM_0011850 CD22 | 0.98076923 |
| hsa-miR-129C NM_0011851 CD22 | 0.98076923 |
| hsa-miR-6515 NM_0011851 CD22 | 0.98076923 |
| hsa-miR-6716 NM_0011851 CD22 | 0.98076923 |
| hsa-miR-6763 NM_0011851 CD22 | 0.98076923 |
| hsa-miR-8075 NM_0011851 CD22 | 0.98076923 |
| hsa-miR-8075 NM_0011851 CD22 | 0.98076923 |
| hsa-miR-33a- NM_0012784 CD22 | 1          |
| hsa-miR-197- NM_0012784 CD22 | 1          |
| hsa-miR-198 NM_0012784 CD22  | 1          |
| hsa-miR-135a NM_0012784 CD22 | 1          |
| hsa-miR-125a NM_0012784 CD22 | 1          |
| hsa-miR-372- NM_0012784 CD22 | 1          |
| hsa-miR-345- NM_0012784 CD22 | 1          |
| hsa-miR-487a NM_0012784 CD22 | 1          |
| hsa-miR-490- NM_0012784 CD22 | 1          |
| hsa-miR-515- NM_0012784 CD22 | 1          |
| hsa-miR-519e NM_0012784 CD22 | 1          |
| hsa-miR-520b NM_0012784 CD22 | 1          |
| hsa-miR-518e NM_0012784 CD22 | 1          |
| hsa-miR-92b- NM_0012784 CD22 | 1          |
| hsa-miR-615- NM_0012784 CD22 | 1          |
| hsa-miR-33b- NM_0012784 CD22 | 1          |
| hsa-miR-638 NM_0012784 CD22  | 1          |
| hsa-miR-647 NM_0012784 CD22  | 1          |
| hsa-miR-659- NM_0012784 CD22 | 1          |
| hsa-miR-769- NM_0012784 CD22 | 1          |
| hsa-miR-378d NM_0012784 CD22 | 1          |
| hsa-miR-941 NM_0012784 CD22  | 1          |
| hsa-miR-1233 NM_0012784 CD22 | 1          |
| hsa-miR-1207 NM_0012784 CD22 | 1          |
| hsa-miR-1293 NM_0012784 CD22 | 1          |
| hsa-miR-1295 NM_0012784 CD22 | 1          |
| hsa-miR-1304 NM_0012784 CD22 | 1          |
| hsa-miR-1249 NM_0012784 CD22 | 1          |
| hsa-miR-1249 NM_0012784 CD22 | 1          |
| hsa-miR-1266 NM_0012784 CD22 | 1          |
| hsa-miR-1288 NM_0012784 CD22 | 1          |
| hsa-miR-1905 NM_0012784 CD22 | 1          |
| hsa-miR-1910 NM_0012784 CD22 | 1          |
| hsa-miR-1972 NM_0012784 CD22 | 1          |
| hsa-miR-1972 NM_0012784 CD22 | 1          |
| hsa-miR-3132 NM_0012784 CD22 | 1          |
| hsa-miR-378b NM_0012784 CD22 | 1          |
| hsa-miR-3152 NM_0012784 CD22 | 1          |
| hsa-miR-3156 NM_0012784 CD22 | 1          |
| hsa-miR-3157 NM_0012784 CD22 | 1          |
| hsa-miR-3162 NM_0012784 CD22 | 1          |
| hsa-miR-3166 NM_0012784 CD22 | 1          |
| hsa-miR-3186 NM_0012784 CD22 | 1          |
| hsa-miR-3197 NM_0012784 CD22 | 1          |
| hsa-miR-3200 NM_0012784 CD22 | 1          |
| hsa-miR-3200 NM_0012784 CD22 | 1          |
| hsa-miR-3202 NM_0012784 CD22 | 1          |
| hsa-miR-4296 NM_0012784 CD22 | 1          |
| hsa-miR-4255 NM_0012784 CD22 | 1          |
| hsa-miR-3622 NM_0012784 CD22 | 1          |
| hsa-miR-3685 NM_0012784 CD22 | 1          |
| hsa-miR-3685 NM_0012784 CD22 | 1          |
| hsa-miR-3692 NM_0012784 CD22 | 1          |
| hsa-miR-3934 NM_0012784 CD22 | 1          |
| hsa-miR-4423 NM_0012784 CD22 | 1          |
| hsa-miR-4437 NM_0012784 CD22 | 1          |
| hsa-miR-4441 NM_0012784 CD22 | 1          |
| hsa-miR-4450 NM_0012784 CD22 | 1          |
| hsa-miR-4466 NM_0012784 CD22 | 1          |
| hsa-miR-3685 NM_0012784 CD22 | 1          |
| hsa-miR-2392 NM_0012784 CD22 | 1          |
| hsa-miR-4522 NM_0012784 CD22 | 1          |
| hsa-miR-4525 NM_0012784 CD22 | 1          |
| hsa-miR-4534 NM_0012784 CD22 | 1          |
| hsa-miR-1587 NM_0012784 CD22 | 1          |
| hsa-miR-4645 NM_0012784 CD22 | 1          |
| hsa-miR-4650 NM_0012784 CD22 | 1          |
| hsa-miR-4653 NM_0012784 CD22 | 1          |
| hsa-miR-4673 NM_0012784 CD22 | 1          |
| hsa-miR-4688 NM_0012784 CD22 | 1          |
| hsa-miR-4690 NM_0012784 CD22 | 1          |
| hsa-miR-4691 NM_0012784 CD22 | 1          |
| hsa-miR-4723 NM_0012784 CD22 | 1          |
| hsa-miR-4726 NM_0012784 CD22 | 1          |

|                              |   |
|------------------------------|---|
| hsa-miR-4743 NM_0012784 CD22 | 1 |
| hsa-miR-4746 NM_0012784 CD22 | 1 |
| hsa-miR-4755 NM_0012784 CD22 | 1 |
| hsa-miR-4768 NM_0012784 CD22 | 1 |
| hsa-miR-4769 NM_0012784 CD22 | 1 |
| hsa-miR-4436 NM_0012784 CD22 | 1 |
| hsa-miR-2467 NM_0012784 CD22 | 1 |
| hsa-miR-5004 NM_0012784 CD22 | 1 |
| hsa-miR-501C NM_0012784 CD22 | 1 |
| hsa-miR-5088 NM_0012784 CD22 | 1 |
| hsa-miR-5192 NM_0012784 CD22 | 1 |
| hsa-miR-664b NM_0012784 CD22 | 1 |
| hsa-miR-5584 NM_0012784 CD22 | 1 |
| hsa-miR-1295 NM_0012784 CD22 | 1 |
| hsa-miR-609C NM_0012784 CD22 | 1 |
| hsa-miR-6124 NM_0012784 CD22 | 1 |
| hsa-miR-378j NM_0012784 CD22 | 1 |
| hsa-miR-6495 NM_0012784 CD22 | 1 |
| hsa-miR-651C NM_0012784 CD22 | 1 |
| hsa-miR-6715 NM_0012784 CD22 | 1 |
| hsa-miR-6727 NM_0012784 CD22 | 1 |
| hsa-miR-6728 NM_0012784 CD22 | 1 |
| hsa-miR-6738 NM_0012784 CD22 | 1 |
| hsa-miR-6739 NM_0012784 CD22 | 1 |
| hsa-miR-6743 NM_0012784 CD22 | 1 |
| hsa-miR-6745 NM_0012784 CD22 | 1 |
| hsa-miR-6748 NM_0012784 CD22 | 1 |
| hsa-miR-6751 NM_0012784 CD22 | 1 |
| hsa-miR-6756 NM_0012784 CD22 | 1 |
| hsa-miR-676C NM_0012784 CD22 | 1 |
| hsa-miR-6765 NM_0012784 CD22 | 1 |
| hsa-miR-6772 NM_0012784 CD22 | 1 |
| hsa-miR-6777 NM_0012784 CD22 | 1 |
| hsa-miR-6791 NM_0012784 CD22 | 1 |
| hsa-miR-6802 NM_0012784 CD22 | 1 |
| hsa-miR-6803 NM_0012784 CD22 | 1 |
| hsa-miR-682C NM_0012784 CD22 | 1 |
| hsa-miR-6824 NM_0012784 CD22 | 1 |
| hsa-miR-6835 NM_0012784 CD22 | 1 |
| hsa-miR-6838 NM_0012784 CD22 | 1 |
| hsa-miR-6839 NM_0012784 CD22 | 1 |
| hsa-miR-6845 NM_0012784 CD22 | 1 |
| hsa-miR-6849 NM_0012784 CD22 | 1 |
| hsa-miR-6857 NM_0012784 CD22 | 1 |
| hsa-miR-6857 NM_0012784 CD22 | 1 |
| hsa-miR-6864 NM_0012784 CD22 | 1 |
| hsa-miR-6872 NM_0012784 CD22 | 1 |
| hsa-miR-6877 NM_0012784 CD22 | 1 |
| hsa-miR-6889 NM_0012784 CD22 | 1 |
| hsa-miR-6891 NM_0012784 CD22 | 1 |
| hsa-miR-6895 NM_0012784 CD22 | 1 |
| hsa-miR-7107 NM_0012784 CD22 | 1 |
| hsa-miR-711C NM_0012784 CD22 | 1 |
| hsa-miR-715C NM_0012784 CD22 | 1 |
| hsa-miR-7847 NM_0012784 CD22 | 1 |
| hsa-miR-8082 NM_0012784 CD22 | 1 |
| hsa-miR-1039 NM_0012784 CD22 | 1 |
| hsa-miR-1039 NM_0012784 CD22 | 1 |
| hsa-miR-1039 NM_0012784 CD22 | 1 |
| hsa-miR-33a- NM_001771 CD22  | 1 |
| hsa-miR-197- NM_001771 CD22  | 1 |
| hsa-miR-198 NM_001771 CD22   | 1 |
| hsa-miR-135a NM_001771 CD22  | 1 |
| hsa-miR-125a NM_001771 CD22  | 1 |
| hsa-miR-372- NM_001771 CD22  | 1 |
| hsa-miR-345- NM_001771 CD22  | 1 |
| hsa-miR-487a NM_001771 CD22  | 1 |
| hsa-miR-490- NM_001771 CD22  | 1 |
| hsa-miR-515- NM_001771 CD22  | 1 |
| hsa-miR-519e NM_001771 CD22  | 1 |
| hsa-miR-520b NM_001771 CD22  | 1 |
| hsa-miR-518e NM_001771 CD22  | 1 |
| hsa-miR-92b- NM_001771 CD22  | 1 |
| hsa-miR-615- NM_001771 CD22  | 1 |
| hsa-miR-33b- NM_001771 CD22  | 1 |
| hsa-miR-638 NM_001771 CD22   | 1 |
| hsa-miR-647 NM_001771 CD22   | 1 |
| hsa-miR-659- NM_001771 CD22  | 1 |
| hsa-miR-769- NM_001771 CD22  | 1 |
| hsa-miR-378d NM_001771 CD22  | 1 |
| hsa-miR-941 NM_001771 CD22   | 1 |
| hsa-miR-1233 NM_001771 CD22  | 1 |
| hsa-miR-1207 NM_001771 CD22  | 1 |
| hsa-miR-1293 NM_001771 CD22  | 1 |
| hsa-miR-1295 NM_001771 CD22  | 1 |
| hsa-miR-1304 NM_001771 CD22  | 1 |
| hsa-miR-1249 NM_001771 CD22  | 1 |
| hsa-miR-1249 NM_001771 CD22  | 1 |
| hsa-miR-1266 NM_001771 CD22  | 1 |
| hsa-miR-1288 NM_001771 CD22  | 1 |
| hsa-miR-191C NM_001771 CD22  | 1 |
| hsa-miR-1972 NM_001771 CD22  | 1 |
| hsa-miR-1972 NM_001771 CD22  | 1 |
| hsa-miR-3132 NM_001771 CD22  | 1 |

|              |            |      |   |
|--------------|------------|------|---|
| hsa-miR-378b | NM_001771  | CD22 | 1 |
| hsa-miR-3152 | NM_001771  | CD22 | 1 |
| hsa-miR-3156 | NM_001771  | CD22 | 1 |
| hsa-miR-3157 | NM_001771  | CD22 | 1 |
| hsa-miR-3162 | NM_001771  | CD22 | 1 |
| hsa-miR-3166 | NM_001771  | CD22 | 1 |
| hsa-miR-3186 | NM_001771  | CD22 | 1 |
| hsa-miR-3197 | NM_001771  | CD22 | 1 |
| hsa-miR-320C | NM_001771  | CD22 | 1 |
| hsa-miR-320C | NM_001771  | CD22 | 1 |
| hsa-miR-3202 | NM_001771  | CD22 | 1 |
| hsa-miR-4296 | NM_001771  | CD22 | 1 |
| hsa-miR-3622 | NM_001771  | CD22 | 1 |
| hsa-miR-3689 | NM_001771  | CD22 | 1 |
| hsa-miR-3692 | NM_001771  | CD22 | 1 |
| hsa-miR-3934 | NM_001771  | CD22 | 1 |
| hsa-miR-4423 | NM_001771  | CD22 | 1 |
| hsa-miR-4437 | NM_001771  | CD22 | 1 |
| hsa-miR-4441 | NM_001771  | CD22 | 1 |
| hsa-miR-4466 | NM_001771  | CD22 | 1 |
| hsa-miR-3689 | NM_001771  | CD22 | 1 |
| hsa-miR-2392 | NM_001771  | CD22 | 1 |
| hsa-miR-4522 | NM_001771  | CD22 | 1 |
| hsa-miR-4525 | NM_001771  | CD22 | 1 |
| hsa-miR-1587 | NM_001771  | CD22 | 1 |
| hsa-miR-4633 | NM_001771  | CD22 | 1 |
| hsa-miR-4649 | NM_001771  | CD22 | 1 |
| hsa-miR-465C | NM_001771  | CD22 | 1 |
| hsa-miR-4653 | NM_001771  | CD22 | 1 |
| hsa-miR-4673 | NM_001771  | CD22 | 1 |
| hsa-miR-4691 | NM_001771  | CD22 | 1 |
| hsa-miR-4723 | NM_001771  | CD22 | 1 |
| hsa-miR-4726 | NM_001771  | CD22 | 1 |
| hsa-miR-4743 | NM_001771  | CD22 | 1 |
| hsa-miR-4746 | NM_001771  | CD22 | 1 |
| hsa-miR-4768 | NM_001771  | CD22 | 1 |
| hsa-miR-4769 | NM_001771  | CD22 | 1 |
| hsa-miR-4436 | NM_001771  | CD22 | 1 |
| hsa-miR-2467 | NM_001771  | CD22 | 1 |
| hsa-miR-5004 | NM_001771  | CD22 | 1 |
| hsa-miR-501C | NM_001771  | CD22 | 1 |
| hsa-miR-5088 | NM_001771  | CD22 | 1 |
| hsa-miR-5192 | NM_001771  | CD22 | 1 |
| hsa-miR-664b | NM_001771  | CD22 | 1 |
| hsa-miR-5584 | NM_001771  | CD22 | 1 |
| hsa-miR-1295 | NM_001771  | CD22 | 1 |
| hsa-miR-6124 | NM_001771  | CD22 | 1 |
| hsa-miR-378j | NM_001771  | CD22 | 1 |
| hsa-miR-6499 | NM_001771  | CD22 | 1 |
| hsa-miR-651C | NM_001771  | CD22 | 1 |
| hsa-miR-6715 | NM_001771  | CD22 | 1 |
| hsa-miR-6728 | NM_001771  | CD22 | 1 |
| hsa-miR-6735 | NM_001771  | CD22 | 1 |
| hsa-miR-6738 | NM_001771  | CD22 | 1 |
| hsa-miR-6739 | NM_001771  | CD22 | 1 |
| hsa-miR-6745 | NM_001771  | CD22 | 1 |
| hsa-miR-6748 | NM_001771  | CD22 | 1 |
| hsa-miR-6756 | NM_001771  | CD22 | 1 |
| hsa-miR-676C | NM_001771  | CD22 | 1 |
| hsa-miR-6765 | NM_001771  | CD22 | 1 |
| hsa-miR-6777 | NM_001771  | CD22 | 1 |
| hsa-miR-6791 | NM_001771  | CD22 | 1 |
| hsa-miR-6802 | NM_001771  | CD22 | 1 |
| hsa-miR-6803 | NM_001771  | CD22 | 1 |
| hsa-miR-6824 | NM_001771  | CD22 | 1 |
| hsa-miR-6835 | NM_001771  | CD22 | 1 |
| hsa-miR-6838 | NM_001771  | CD22 | 1 |
| hsa-miR-6839 | NM_001771  | CD22 | 1 |
| hsa-miR-6845 | NM_001771  | CD22 | 1 |
| hsa-miR-6849 | NM_001771  | CD22 | 1 |
| hsa-miR-6857 | NM_001771  | CD22 | 1 |
| hsa-miR-6857 | NM_001771  | CD22 | 1 |
| hsa-miR-6864 | NM_001771  | CD22 | 1 |
| hsa-miR-6872 | NM_001771  | CD22 | 1 |
| hsa-miR-6889 | NM_001771  | CD22 | 1 |
| hsa-miR-6891 | NM_001771  | CD22 | 1 |
| hsa-miR-6895 | NM_001771  | CD22 | 1 |
| hsa-miR-7107 | NM_001771  | CD22 | 1 |
| hsa-miR-711C | NM_001771  | CD22 | 1 |
| hsa-miR-715C | NM_001771  | CD22 | 1 |
| hsa-miR-7847 | NM_001771  | CD22 | 1 |
| hsa-miR-8082 | NM_001771  | CD22 | 1 |
| hsa-miR-1039 | NM_001771  | CD22 | 1 |
| hsa-miR-1039 | NM_001771  | CD22 | 1 |
| hsa-miR-1039 | NM_001771  | CD22 | 1 |
| hsa-miR-33a- | NM_0011850 | CD22 | 1 |
| hsa-miR-197- | NM_0011850 | CD22 | 1 |
| hsa-miR-198  | NM_0011850 | CD22 | 1 |
| hsa-miR-135a | NM_0011850 | CD22 | 1 |
| hsa-miR-125a | NM_0011850 | CD22 | 1 |
| hsa-miR-149- | NM_0011850 | CD22 | 1 |
| hsa-miR-372- | NM_0011850 | CD22 | 1 |
| hsa-miR-345- | NM_0011850 | CD22 | 1 |
| hsa-miR-487a | NM_0011850 | CD22 | 1 |

|              |            |      |   |
|--------------|------------|------|---|
| hsa-miR-490- | NM_0011850 | CD22 | 1 |
| hsa-miR-515- | NM_0011850 | CD22 | 1 |
| hsa-miR-519e | NM_0011850 | CD22 | 1 |
| hsa-miR-520t | NM_0011850 | CD22 | 1 |
| hsa-miR-518e | NM_0011850 | CD22 | 1 |
| hsa-miR-92b- | NM_0011850 | CD22 | 1 |
| hsa-miR-615- | NM_0011850 | CD22 | 1 |
| hsa-miR-33b- | NM_0011850 | CD22 | 1 |
| hsa-miR-638  | NM_0011850 | CD22 | 1 |
| hsa-miR-647  | NM_0011850 | CD22 | 1 |
| hsa-miR-659- | NM_0011850 | CD22 | 1 |
| hsa-miR-769- | NM_0011850 | CD22 | 1 |
| hsa-miR-378d | NM_0011850 | CD22 | 1 |
| hsa-miR-941  | NM_0011850 | CD22 | 1 |
| hsa-miR-1233 | NM_0011850 | CD22 | 1 |
| hsa-miR-1207 | NM_0011850 | CD22 | 1 |
| hsa-miR-1293 | NM_0011850 | CD22 | 1 |
| hsa-miR-1295 | NM_0011850 | CD22 | 1 |
| hsa-miR-1304 | NM_0011850 | CD22 | 1 |
| hsa-miR-1245 | NM_0011850 | CD22 | 1 |
| hsa-miR-1245 | NM_0011850 | CD22 | 1 |
| hsa-miR-1266 | NM_0011850 | CD22 | 1 |
| hsa-miR-1288 | NM_0011850 | CD22 | 1 |
| hsa-miR-191C | NM_0011850 | CD22 | 1 |
| hsa-miR-1972 | NM_0011850 | CD22 | 1 |
| hsa-miR-1972 | NM_0011850 | CD22 | 1 |
| hsa-miR-3132 | NM_0011850 | CD22 | 1 |
| hsa-miR-378t | NM_0011850 | CD22 | 1 |
| hsa-miR-3152 | NM_0011850 | CD22 | 1 |
| hsa-miR-3156 | NM_0011850 | CD22 | 1 |
| hsa-miR-3157 | NM_0011850 | CD22 | 1 |
| hsa-miR-3162 | NM_0011850 | CD22 | 1 |
| hsa-miR-3166 | NM_0011850 | CD22 | 1 |
| hsa-miR-3186 | NM_0011850 | CD22 | 1 |
| hsa-miR-3197 | NM_0011850 | CD22 | 1 |
| hsa-miR-320C | NM_0011850 | CD22 | 1 |
| hsa-miR-320C | NM_0011850 | CD22 | 1 |
| hsa-miR-3202 | NM_0011850 | CD22 | 1 |
| hsa-miR-4296 | NM_0011850 | CD22 | 1 |
| hsa-miR-3622 | NM_0011850 | CD22 | 1 |
| hsa-miR-3689 | NM_0011850 | CD22 | 1 |
| hsa-miR-3692 | NM_0011850 | CD22 | 1 |
| hsa-miR-3934 | NM_0011850 | CD22 | 1 |
| hsa-miR-4423 | NM_0011850 | CD22 | 1 |
| hsa-miR-4437 | NM_0011850 | CD22 | 1 |
| hsa-miR-4441 | NM_0011850 | CD22 | 1 |
| hsa-miR-4466 | NM_0011850 | CD22 | 1 |
| hsa-miR-3689 | NM_0011850 | CD22 | 1 |
| hsa-miR-2392 | NM_0011850 | CD22 | 1 |
| hsa-miR-4525 | NM_0011850 | CD22 | 1 |
| hsa-miR-1587 | NM_0011850 | CD22 | 1 |
| hsa-miR-4633 | NM_0011850 | CD22 | 1 |
| hsa-miR-4645 | NM_0011850 | CD22 | 1 |
| hsa-miR-465C | NM_0011850 | CD22 | 1 |
| hsa-miR-4653 | NM_0011850 | CD22 | 1 |
| hsa-miR-4673 | NM_0011850 | CD22 | 1 |
| hsa-miR-4688 | NM_0011850 | CD22 | 1 |
| hsa-miR-4691 | NM_0011850 | CD22 | 1 |
| hsa-miR-4723 | NM_0011850 | CD22 | 1 |
| hsa-miR-4726 | NM_0011850 | CD22 | 1 |
| hsa-miR-4743 | NM_0011850 | CD22 | 1 |
| hsa-miR-4745 | NM_0011850 | CD22 | 1 |
| hsa-miR-4746 | NM_0011850 | CD22 | 1 |
| hsa-miR-4768 | NM_0011850 | CD22 | 1 |
| hsa-miR-4769 | NM_0011850 | CD22 | 1 |
| hsa-miR-4436 | NM_0011850 | CD22 | 1 |
| hsa-miR-2467 | NM_0011850 | CD22 | 1 |
| hsa-miR-5001 | NM_0011850 | CD22 | 1 |
| hsa-miR-5004 | NM_0011850 | CD22 | 1 |
| hsa-miR-501C | NM_0011850 | CD22 | 1 |
| hsa-miR-5088 | NM_0011850 | CD22 | 1 |
| hsa-miR-5192 | NM_0011850 | CD22 | 1 |
| hsa-miR-664t | NM_0011850 | CD22 | 1 |
| hsa-miR-5584 | NM_0011850 | CD22 | 1 |
| hsa-miR-1295 | NM_0011850 | CD22 | 1 |
| hsa-miR-6124 | NM_0011850 | CD22 | 1 |
| hsa-miR-378j | NM_0011850 | CD22 | 1 |
| hsa-miR-6495 | NM_0011850 | CD22 | 1 |
| hsa-miR-651C | NM_0011850 | CD22 | 1 |
| hsa-miR-6715 | NM_0011850 | CD22 | 1 |
| hsa-miR-6728 | NM_0011850 | CD22 | 1 |
| hsa-miR-6735 | NM_0011850 | CD22 | 1 |
| hsa-miR-6738 | NM_0011850 | CD22 | 1 |
| hsa-miR-6738 | NM_0011850 | CD22 | 1 |
| hsa-miR-6739 | NM_0011850 | CD22 | 1 |
| hsa-miR-6745 | NM_0011850 | CD22 | 1 |
| hsa-miR-6748 | NM_0011850 | CD22 | 1 |
| hsa-miR-6756 | NM_0011850 | CD22 | 1 |
| hsa-miR-676C | NM_0011850 | CD22 | 1 |
| hsa-miR-6765 | NM_0011850 | CD22 | 1 |
| hsa-miR-6777 | NM_0011850 | CD22 | 1 |
| hsa-miR-6783 | NM_0011850 | CD22 | 1 |
| hsa-miR-679C | NM_0011850 | CD22 | 1 |
| hsa-miR-6791 | NM_0011850 | CD22 | 1 |

|                               |   |
|-------------------------------|---|
| hsa-miR-6802 NM_0011850 CD22  | 1 |
| hsa-miR-6803 NM_0011850 CD22  | 1 |
| hsa-miR-6824 NM_0011850 CD22  | 1 |
| hsa-miR-6835 NM_0011850 CD22  | 1 |
| hsa-miR-6838 NM_0011850 CD22  | 1 |
| hsa-miR-6839 NM_0011850 CD22  | 1 |
| hsa-miR-6845 NM_0011850 CD22  | 1 |
| hsa-miR-6849 NM_0011850 CD22  | 1 |
| hsa-miR-6857 NM_0011850 CD22  | 1 |
| hsa-miR-6857 NM_0011850 CD22  | 1 |
| hsa-miR-6864 NM_0011850 CD22  | 1 |
| hsa-miR-6872 NM_0011850 CD22  | 1 |
| hsa-miR-6889 NM_0011850 CD22  | 1 |
| hsa-miR-6891 NM_0011850 CD22  | 1 |
| hsa-miR-6895 NM_0011850 CD22  | 1 |
| hsa-miR-7107 NM_0011850 CD22  | 1 |
| hsa-miR-711C NM_0011850 CD22  | 1 |
| hsa-miR-715C NM_0011850 CD22  | 1 |
| hsa-miR-7847 NM_0011850 CD22  | 1 |
| hsa-miR-8082 NM_0011850 CD22  | 1 |
| hsa-miR-1039 NM_0011850 CD22  | 1 |
| hsa-miR-1039 NM_0011850 CD22  | 1 |
| hsa-miR-1039 NM_0011850 CD22  | 1 |
| hsa-miR-19a-1 NM_0011851 CD22 | 1 |
| hsa-miR-33a-1 NM_0011851 CD22 | 1 |
| hsa-miR-197-1 NM_0011851 CD22 | 1 |
| hsa-miR-198 NM_0011851 CD22   | 1 |
| hsa-miR-135a NM_0011851 CD22  | 1 |
| hsa-miR-125a NM_0011851 CD22  | 1 |
| hsa-miR-372-1 NM_0011851 CD22 | 1 |
| hsa-miR-323a NM_0011851 CD22  | 1 |
| hsa-miR-345-1 NM_0011851 CD22 | 1 |
| hsa-miR-485-1 NM_0011851 CD22 | 1 |
| hsa-miR-487a NM_0011851 CD22  | 1 |
| hsa-miR-490-1 NM_0011851 CD22 | 1 |
| hsa-miR-495-1 NM_0011851 CD22 | 1 |
| hsa-miR-515-1 NM_0011851 CD22 | 1 |
| hsa-miR-519e NM_0011851 CD22  | 1 |
| hsa-miR-520b NM_0011851 CD22  | 1 |
| hsa-miR-518e NM_0011851 CD22  | 1 |
| hsa-miR-92b-1 NM_0011851 CD22 | 1 |
| hsa-miR-578 NM_0011851 CD22   | 1 |
| hsa-miR-584-1 NM_0011851 CD22 | 1 |
| hsa-miR-596 NM_0011851 CD22   | 1 |
| hsa-miR-615-1 NM_0011851 CD22 | 1 |
| hsa-miR-33b-1 NM_0011851 CD22 | 1 |
| hsa-miR-638 NM_0011851 CD22   | 1 |
| hsa-miR-647 NM_0011851 CD22   | 1 |
| hsa-miR-549a NM_0011851 CD22  | 1 |
| hsa-miR-659-1 NM_0011851 CD22 | 1 |
| hsa-miR-550a NM_0011851 CD22  | 1 |
| hsa-miR-1224 NM_0011851 CD22  | 1 |
| hsa-miR-769-1 NM_0011851 CD22 | 1 |
| hsa-miR-378d NM_0011851 CD22  | 1 |
| hsa-miR-941 NM_0011851 CD22   | 1 |
| hsa-miR-1233 NM_0011851 CD22  | 1 |
| hsa-miR-1207 NM_0011851 CD22  | 1 |
| hsa-miR-1293 NM_0011851 CD22  | 1 |
| hsa-miR-1295 NM_0011851 CD22  | 1 |
| hsa-miR-1304 NM_0011851 CD22  | 1 |
| hsa-miR-1249 NM_0011851 CD22  | 1 |
| hsa-miR-1249 NM_0011851 CD22  | 1 |
| hsa-miR-1250 NM_0011851 CD22  | 1 |
| hsa-miR-1266 NM_0011851 CD22  | 1 |
| hsa-miR-1288 NM_0011851 CD22  | 1 |
| hsa-miR-1470 NM_0011851 CD22  | 1 |
| hsa-miR-191C NM_0011851 CD22  | 1 |
| hsa-miR-191C NM_0011851 CD22  | 1 |
| hsa-miR-1972 NM_0011851 CD22  | 1 |
| hsa-miR-1972 NM_0011851 CD22  | 1 |
| hsa-miR-2115 NM_0011851 CD22  | 1 |
| hsa-miR-3132 NM_0011851 CD22  | 1 |
| hsa-miR-378b NM_0011851 CD22  | 1 |
| hsa-miR-3152 NM_0011851 CD22  | 1 |
| hsa-miR-3156 NM_0011851 CD22  | 1 |
| hsa-miR-3157 NM_0011851 CD22  | 1 |
| hsa-miR-3162 NM_0011851 CD22  | 1 |
| hsa-miR-3166 NM_0011851 CD22  | 1 |
| hsa-miR-3182 NM_0011851 CD22  | 1 |
| hsa-miR-3186 NM_0011851 CD22  | 1 |
| hsa-miR-3187 NM_0011851 CD22  | 1 |
| hsa-miR-3197 NM_0011851 CD22  | 1 |
| hsa-miR-320C NM_0011851 CD22  | 1 |
| hsa-miR-320C NM_0011851 CD22  | 1 |
| hsa-miR-3202 NM_0011851 CD22  | 1 |
| hsa-miR-4296 NM_0011851 CD22  | 1 |
| hsa-miR-4315 NM_0011851 CD22  | 1 |
| hsa-miR-3614 NM_0011851 CD22  | 1 |
| hsa-miR-3622 NM_0011851 CD22  | 1 |
| hsa-miR-3655 NM_0011851 CD22  | 1 |
| hsa-miR-3689 NM_0011851 CD22  | 1 |
| hsa-miR-3692 NM_0011851 CD22  | 1 |
| hsa-miR-3915 NM_0011851 CD22  | 1 |
| hsa-miR-3934 NM_0011851 CD22  | 1 |

|                              |   |
|------------------------------|---|
| hsa-miR-550t NM_0011851 CD22 | 1 |
| hsa-miR-4423 NM_0011851 CD22 | 1 |
| hsa-miR-4437 NM_0011851 CD22 | 1 |
| hsa-miR-4441 NM_0011851 CD22 | 1 |
| hsa-miR-4466 NM_0011851 CD22 | 1 |
| hsa-miR-3689 NM_0011851 CD22 | 1 |
| hsa-miR-2392 NM_0011851 CD22 | 1 |
| hsa-miR-4522 NM_0011851 CD22 | 1 |
| hsa-miR-4525 NM_0011851 CD22 | 1 |
| hsa-miR-4534 NM_0011851 CD22 | 1 |
| hsa-miR-1587 NM_0011851 CD22 | 1 |
| hsa-miR-454C NM_0011851 CD22 | 1 |
| hsa-miR-4633 NM_0011851 CD22 | 1 |
| hsa-miR-4649 NM_0011851 CD22 | 1 |
| hsa-miR-465C NM_0011851 CD22 | 1 |
| hsa-miR-4653 NM_0011851 CD22 | 1 |
| hsa-miR-467C NM_0011851 CD22 | 1 |
| hsa-miR-4673 NM_0011851 CD22 | 1 |
| hsa-miR-4691 NM_0011851 CD22 | 1 |
| hsa-miR-4704 NM_0011851 CD22 | 1 |
| hsa-miR-4723 NM_0011851 CD22 | 1 |
| hsa-miR-4726 NM_0011851 CD22 | 1 |
| hsa-miR-4743 NM_0011851 CD22 | 1 |
| hsa-miR-4746 NM_0011851 CD22 | 1 |
| hsa-miR-4768 NM_0011851 CD22 | 1 |
| hsa-miR-4769 NM_0011851 CD22 | 1 |
| hsa-miR-4436 NM_0011851 CD22 | 1 |
| hsa-miR-5004 NM_0011851 CD22 | 1 |
| hsa-miR-501C NM_0011851 CD22 | 1 |
| hsa-miR-501C NM_0011851 CD22 | 1 |
| hsa-miR-5088 NM_0011851 CD22 | 1 |
| hsa-miR-5192 NM_0011851 CD22 | 1 |
| hsa-miR-664t NM_0011851 CD22 | 1 |
| hsa-miR-5584 NM_0011851 CD22 | 1 |
| hsa-miR-1295 NM_0011851 CD22 | 1 |
| hsa-miR-6071 NM_0011851 CD22 | 1 |
| hsa-miR-608C NM_0011851 CD22 | 1 |
| hsa-miR-609C NM_0011851 CD22 | 1 |
| hsa-miR-6124 NM_0011851 CD22 | 1 |
| hsa-miR-378j NM_0011851 CD22 | 1 |
| hsa-miR-6499 NM_0011851 CD22 | 1 |
| hsa-miR-651C NM_0011851 CD22 | 1 |
| hsa-miR-6514 NM_0011851 CD22 | 1 |
| hsa-miR-6715 NM_0011851 CD22 | 1 |
| hsa-miR-6728 NM_0011851 CD22 | 1 |
| hsa-miR-6735 NM_0011851 CD22 | 1 |
| hsa-miR-6738 NM_0011851 CD22 | 1 |
| hsa-miR-6739 NM_0011851 CD22 | 1 |
| hsa-miR-6743 NM_0011851 CD22 | 1 |
| hsa-miR-6745 NM_0011851 CD22 | 1 |
| hsa-miR-6748 NM_0011851 CD22 | 1 |
| hsa-miR-6756 NM_0011851 CD22 | 1 |
| hsa-miR-676C NM_0011851 CD22 | 1 |
| hsa-miR-6762 NM_0011851 CD22 | 1 |
| hsa-miR-6765 NM_0011851 CD22 | 1 |
| hsa-miR-6777 NM_0011851 CD22 | 1 |
| hsa-miR-6781 NM_0011851 CD22 | 1 |
| hsa-miR-6782 NM_0011851 CD22 | 1 |
| hsa-miR-6787 NM_0011851 CD22 | 1 |
| hsa-miR-6791 NM_0011851 CD22 | 1 |
| hsa-miR-6802 NM_0011851 CD22 | 1 |
| hsa-miR-6803 NM_0011851 CD22 | 1 |
| hsa-miR-6819 NM_0011851 CD22 | 1 |
| hsa-miR-6824 NM_0011851 CD22 | 1 |
| hsa-miR-6835 NM_0011851 CD22 | 1 |
| hsa-miR-6836 NM_0011851 CD22 | 1 |
| hsa-miR-6838 NM_0011851 CD22 | 1 |
| hsa-miR-6839 NM_0011851 CD22 | 1 |
| hsa-miR-6845 NM_0011851 CD22 | 1 |
| hsa-miR-6849 NM_0011851 CD22 | 1 |
| hsa-miR-6857 NM_0011851 CD22 | 1 |
| hsa-miR-6857 NM_0011851 CD22 | 1 |
| hsa-miR-6859 NM_0011851 CD22 | 1 |
| hsa-miR-6862 NM_0011851 CD22 | 1 |
| hsa-miR-6864 NM_0011851 CD22 | 1 |
| hsa-miR-6872 NM_0011851 CD22 | 1 |
| hsa-miR-6875 NM_0011851 CD22 | 1 |
| hsa-miR-6879 NM_0011851 CD22 | 1 |
| hsa-miR-6889 NM_0011851 CD22 | 1 |
| hsa-miR-6891 NM_0011851 CD22 | 1 |
| hsa-miR-6895 NM_0011851 CD22 | 1 |
| hsa-miR-7107 NM_0011851 CD22 | 1 |
| hsa-miR-715C NM_0011851 CD22 | 1 |
| hsa-miR-7843 NM_0011851 CD22 | 1 |
| hsa-miR-7847 NM_0011851 CD22 | 1 |
| hsa-miR-7978 NM_0011851 CD22 | 1 |
| hsa-miR-8082 NM_0011851 CD22 | 1 |
| hsa-miR-1039 NM_0011851 CD22 | 1 |
| hsa-miR-1039 NM_0011851 CD22 | 1 |
| hsa-miR-104C NM_0011851 CD22 | 1 |
| hsa-miR-1039 NM_0011851 CD22 | 1 |
| hsa-miR-1212 NM_0011851 CD22 | 1 |
| hsa-miR-33a- NM_0011851 CD22 | 1 |
| hsa-miR-197- NM_0011851 CD22 | 1 |

|              |            |      |   |
|--------------|------------|------|---|
| hsa-miR-137- | NM_0011851 | CD22 | 1 |
| hsa-miR-149- | NM_0011851 | CD22 | 1 |
| hsa-miR-320a | NM_0011851 | CD22 | 1 |
| hsa-miR-372- | NM_0011851 | CD22 | 1 |
| hsa-miR-377- | NM_0011851 | CD22 | 1 |
| hsa-miR-490- | NM_0011851 | CD22 | 1 |
| hsa-miR-193b | NM_0011851 | CD22 | 1 |
| hsa-miR-519e | NM_0011851 | CD22 | 1 |
| hsa-miR-520f | NM_0011851 | CD22 | 1 |
| hsa-miR-526b | NM_0011851 | CD22 | 1 |
| hsa-miR-520b | NM_0011851 | CD22 | 1 |
| hsa-miR-520c | NM_0011851 | CD22 | 1 |
| hsa-miR-520d | NM_0011851 | CD22 | 1 |
| hsa-miR-518e | NM_0011851 | CD22 | 1 |
| hsa-miR-608  | NM_0011851 | CD22 | 1 |
| hsa-miR-612  | NM_0011851 | CD22 | 1 |
| hsa-miR-615- | NM_0011851 | CD22 | 1 |
| hsa-miR-638  | NM_0011851 | CD22 | 1 |
| hsa-miR-648  | NM_0011851 | CD22 | 1 |
| hsa-miR-659- | NM_0011851 | CD22 | 1 |
| hsa-miR-320b | NM_0011851 | CD22 | 1 |
| hsa-miR-1468 | NM_0011851 | CD22 | 1 |
| hsa-miR-449c | NM_0011851 | CD22 | 1 |
| hsa-miR-769- | NM_0011851 | CD22 | 1 |
| hsa-miR-378d | NM_0011851 | CD22 | 1 |
| hsa-miR-541- | NM_0011851 | CD22 | 1 |
| hsa-miR-665  | NM_0011851 | CD22 | 1 |
| hsa-miR-941  | NM_0011851 | CD22 | 1 |
| hsa-miR-1233 | NM_0011851 | CD22 | 1 |
| hsa-miR-1203 | NM_0011851 | CD22 | 1 |
| hsa-miR-1207 | NM_0011851 | CD22 | 1 |
| hsa-miR-1293 | NM_0011851 | CD22 | 1 |
| hsa-miR-1249 | NM_0011851 | CD22 | 1 |
| hsa-miR-1249 | NM_0011851 | CD22 | 1 |
| hsa-miR-1249 | NM_0011851 | CD22 | 1 |
| hsa-miR-1972 | NM_0011851 | CD22 | 1 |
| hsa-miR-1972 | NM_0011851 | CD22 | 1 |
| hsa-miR-3141 | NM_0011851 | CD22 | 1 |
| hsa-miR-3152 | NM_0011851 | CD22 | 1 |
| hsa-miR-3154 | NM_0011851 | CD22 | 1 |
| hsa-miR-3158 | NM_0011851 | CD22 | 1 |
| hsa-miR-3162 | NM_0011851 | CD22 | 1 |
| hsa-miR-323b | NM_0011851 | CD22 | 1 |
| hsa-miR-3183 | NM_0011851 | CD22 | 1 |
| hsa-miR-3192 | NM_0011851 | CD22 | 1 |
| hsa-miR-3197 | NM_0011851 | CD22 | 1 |
| hsa-miR-320c | NM_0011851 | CD22 | 1 |
| hsa-miR-320c | NM_0011851 | CD22 | 1 |
| hsa-miR-4296 | NM_0011851 | CD22 | 1 |
| hsa-miR-4304 | NM_0011851 | CD22 | 1 |
| hsa-miR-4257 | NM_0011851 | CD22 | 1 |
| hsa-miR-3615 | NM_0011851 | CD22 | 1 |
| hsa-miR-3619 | NM_0011851 | CD22 | 1 |
| hsa-miR-362c | NM_0011851 | CD22 | 1 |
| hsa-miR-3622 | NM_0011851 | CD22 | 1 |
| hsa-miR-3689 | NM_0011851 | CD22 | 1 |
| hsa-miR-3692 | NM_0011851 | CD22 | 1 |
| hsa-miR-3934 | NM_0011851 | CD22 | 1 |
| hsa-miR-394c | NM_0011851 | CD22 | 1 |
| hsa-miR-4423 | NM_0011851 | CD22 | 1 |
| hsa-miR-4437 | NM_0011851 | CD22 | 1 |
| hsa-miR-4441 | NM_0011851 | CD22 | 1 |
| hsa-miR-3689 | NM_0011851 | CD22 | 1 |
| hsa-miR-4481 | NM_0011851 | CD22 | 1 |
| hsa-miR-4505 | NM_0011851 | CD22 | 1 |
| hsa-miR-4512 | NM_0011851 | CD22 | 1 |
| hsa-miR-4525 | NM_0011851 | CD22 | 1 |
| hsa-miR-4525 | NM_0011851 | CD22 | 1 |
| hsa-miR-378i | NM_0011851 | CD22 | 1 |
| hsa-miR-1587 | NM_0011851 | CD22 | 1 |
| hsa-miR-4649 | NM_0011851 | CD22 | 1 |
| hsa-miR-465c | NM_0011851 | CD22 | 1 |
| hsa-miR-4667 | NM_0011851 | CD22 | 1 |
| hsa-miR-4669 | NM_0011851 | CD22 | 1 |
| hsa-miR-4688 | NM_0011851 | CD22 | 1 |
| hsa-miR-469c | NM_0011851 | CD22 | 1 |
| hsa-miR-4691 | NM_0011851 | CD22 | 1 |
| hsa-miR-4694 | NM_0011851 | CD22 | 1 |
| hsa-miR-4723 | NM_0011851 | CD22 | 1 |
| hsa-miR-4726 | NM_0011851 | CD22 | 1 |
| hsa-miR-4743 | NM_0011851 | CD22 | 1 |
| hsa-miR-4746 | NM_0011851 | CD22 | 1 |
| hsa-miR-4748 | NM_0011851 | CD22 | 1 |
| hsa-miR-4768 | NM_0011851 | CD22 | 1 |
| hsa-miR-4769 | NM_0011851 | CD22 | 1 |
| hsa-miR-4779 | NM_0011851 | CD22 | 1 |
| hsa-miR-2467 | NM_0011851 | CD22 | 1 |
| hsa-miR-2467 | NM_0011851 | CD22 | 1 |
| hsa-miR-4804 | NM_0011851 | CD22 | 1 |
| hsa-miR-5004 | NM_0011851 | CD22 | 1 |
| hsa-miR-5088 | NM_0011851 | CD22 | 1 |
| hsa-miR-5584 | NM_0011851 | CD22 | 1 |
| hsa-miR-1295 | NM_0011851 | CD22 | 1 |
| hsa-miR-1295 | NM_0011851 | CD22 | 1 |
| hsa-miR-1295 | NM_0011851 | CD22 | 1 |

|                              |            |
|------------------------------|------------|
| hsa-miR-5591 NM_0011851 CD22 | 1          |
| hsa-miR-5703 NM_0011851 CD22 | 1          |
| hsa-miR-6084 NM_0011851 CD22 | 1          |
| hsa-miR-6124 NM_0011851 CD22 | 1          |
| hsa-miR-378j NM_0011851 CD22 | 1          |
| hsa-miR-6495 NM_0011851 CD22 | 1          |
| hsa-miR-651C NM_0011851 CD22 | 1          |
| hsa-miR-6715 NM_0011851 CD22 | 1          |
| hsa-miR-6722 NM_0011851 CD22 | 1          |
| hsa-miR-6738 NM_0011851 CD22 | 1          |
| hsa-miR-6738 NM_0011851 CD22 | 1          |
| hsa-miR-6735 NM_0011851 CD22 | 1          |
| hsa-miR-6747 NM_0011851 CD22 | 1          |
| hsa-miR-6745 NM_0011851 CD22 | 1          |
| hsa-miR-676C NM_0011851 CD22 | 1          |
| hsa-miR-6765 NM_0011851 CD22 | 1          |
| hsa-miR-6777 NM_0011851 CD22 | 1          |
| hsa-miR-679C NM_0011851 CD22 | 1          |
| hsa-miR-679C NM_0011851 CD22 | 1          |
| hsa-miR-6802 NM_0011851 CD22 | 1          |
| hsa-miR-6803 NM_0011851 CD22 | 1          |
| hsa-miR-6808 NM_0011851 CD22 | 1          |
| hsa-miR-682C NM_0011851 CD22 | 1          |
| hsa-miR-6835 NM_0011851 CD22 | 1          |
| hsa-miR-6838 NM_0011851 CD22 | 1          |
| hsa-miR-6845 NM_0011851 CD22 | 1          |
| hsa-miR-685C NM_0011851 CD22 | 1          |
| hsa-miR-6851 NM_0011851 CD22 | 1          |
| hsa-miR-6853 NM_0011851 CD22 | 1          |
| hsa-miR-6857 NM_0011851 CD22 | 1          |
| hsa-miR-6857 NM_0011851 CD22 | 1          |
| hsa-miR-6858 NM_0011851 CD22 | 1          |
| hsa-miR-6864 NM_0011851 CD22 | 1          |
| hsa-miR-6872 NM_0011851 CD22 | 1          |
| hsa-miR-6873 NM_0011851 CD22 | 1          |
| hsa-miR-6888 NM_0011851 CD22 | 1          |
| hsa-miR-6895 NM_0011851 CD22 | 1          |
| hsa-miR-711C NM_0011851 CD22 | 1          |
| hsa-miR-7155 NM_0011851 CD22 | 1          |
| hsa-miR-7847 NM_0011851 CD22 | 1          |
| hsa-miR-806C NM_0011851 CD22 | 1          |
| hsa-miR-8082 NM_0011851 CD22 | 1          |
| hsa-miR-1035 NM_0011851 CD22 | 1          |
| hsa-miR-185- NM_002343 LTF   | 0.95384615 |
| hsa-miR-5681 NM_002343 LTF   | 0.95384615 |
| hsa-miR-185- NM_0013211 LTF  | 0.95384615 |
| hsa-miR-5681 NM_0013211 LTF  | 0.95384615 |
| hsa-miR-2276 NM_002343 LTF   | 0.96153846 |
| hsa-miR-3154 NM_002343 LTF   | 0.96153846 |
| hsa-miR-4705 NM_002343 LTF   | 0.96153846 |
| hsa-miR-2276 NM_0013211 LTF  | 0.96153846 |
| hsa-miR-3154 NM_0013211 LTF  | 0.96153846 |
| hsa-miR-4705 NM_0013211 LTF  | 0.96153846 |
| hsa-miR-483- NM_0013211 LTF  | 0.96153846 |
| hsa-miR-3154 NM_0013211 LTF  | 0.96153846 |
| hsa-miR-3177 NM_0013211 LTF  | 0.96153846 |
| hsa-miR-483- NM_0011991 LTF  | 0.96153846 |
| hsa-miR-3154 NM_0011991 LTF  | 0.96153846 |
| hsa-miR-3177 NM_0011991 LTF  | 0.96153846 |
| hsa-miR-4481 NM_0011991 LTF  | 0.96153846 |
| hsa-miR-454C NM_0011991 LTF  | 0.96153846 |
| hsa-miR-6748 NM_0011991 LTF  | 0.96153846 |
| hsa-miR-3615 NM_002343 LTF   | 0.97435897 |
| hsa-miR-4433 NM_002343 LTF   | 0.97435897 |
| hsa-miR-4738 NM_002343 LTF   | 0.97435897 |
| hsa-miR-3615 NM_0013211 LTF  | 0.97435897 |
| hsa-miR-4433 NM_0013211 LTF  | 0.97435897 |
| hsa-miR-4738 NM_0013211 LTF  | 0.97435897 |
| hsa-miR-24-3j NM_0013211 LTF | 0.97435897 |
| hsa-miR-4524 NM_0013211 LTF  | 0.97435897 |
| hsa-miR-6846 NM_0013211 LTF  | 0.97435897 |
| hsa-miR-3615 NM_0011991 LTF  | 0.97435897 |
| hsa-miR-6846 NM_0011991 LTF  | 0.97435897 |
| hsa-miR-6735 NM_002343 LTF   | 0.98076923 |
| hsa-miR-6785 NM_002343 LTF   | 0.98076923 |
| hsa-miR-6735 NM_0013211 LTF  | 0.98076923 |
| hsa-miR-6785 NM_0013211 LTF  | 0.98076923 |
| hsa-miR-874- NM_0013211 LTF  | 0.98076923 |
| hsa-miR-3936 NM_0013211 LTF  | 0.98076923 |
| hsa-miR-30c- NM_002343 LTF   | 1          |
| hsa-miR-205- NM_002343 LTF   | 1          |
| hsa-miR-212- NM_002343 LTF   | 1          |
| hsa-miR-223- NM_002343 LTF   | 1          |
| hsa-miR-125b NM_002343 LTF   | 1          |
| hsa-miR-320a NM_002343 LTF   | 1          |
| hsa-miR-296- NM_002343 LTF   | 1          |
| hsa-miR-365a NM_002343 LTF   | 1          |
| hsa-miR-378a NM_002343 LTF   | 1          |
| hsa-miR-425- NM_002343 LTF   | 1          |
| hsa-miR-483- NM_002343 LTF   | 1          |
| hsa-miR-490- NM_002343 LTF   | 1          |
| hsa-miR-502- NM_002343 LTF   | 1          |
| hsa-miR-544a NM_002343 LTF   | 1          |
| hsa-miR-487b NM_002343 LTF   | 1          |



|              |           |     |   |
|--------------|-----------|-----|---|
| hsa-miR-554  | NM_002343 | LTF | 1 |
| hsa-miR-573  | NM_002343 | LTF | 1 |
| hsa-miR-574  | NM_002343 | LTF | 1 |
| hsa-miR-550a | NM_002343 | LTF | 1 |
| hsa-miR-550a | NM_002343 | LTF | 1 |
| hsa-miR-647  | NM_002343 | LTF | 1 |
| hsa-miR-550a | NM_002343 | LTF | 1 |
| hsa-miR-1296 | NM_002343 | LTF | 1 |
| hsa-miR-1185 | NM_002343 | LTF | 1 |
| hsa-miR-874  | NM_002343 | LTF | 1 |
| hsa-miR-543  | NM_002343 | LTF | 1 |
| hsa-miR-920  | NM_002343 | LTF | 1 |
| hsa-miR-920  | NM_002343 | LTF | 1 |
| hsa-miR-936  | NM_002343 | LTF | 1 |
| hsa-miR-1183 | NM_002343 | LTF | 1 |
| hsa-miR-1228 | NM_002343 | LTF | 1 |
| hsa-miR-1233 | NM_002343 | LTF | 1 |
| hsa-miR-1285 | NM_002343 | LTF | 1 |
| hsa-miR-1244 | NM_002343 | LTF | 1 |
| hsa-miR-1245 | NM_002343 | LTF | 1 |
| hsa-miR-1250 | NM_002343 | LTF | 1 |
| hsa-miR-1251 | NM_002343 | LTF | 1 |
| hsa-miR-1266 | NM_002343 | LTF | 1 |
| hsa-miR-1266 | NM_002343 | LTF | 1 |
| hsa-miR-1275 | NM_002343 | LTF | 1 |
| hsa-miR-1282 | NM_002343 | LTF | 1 |
| hsa-miR-1465 | NM_002343 | LTF | 1 |
| hsa-miR-1908 | NM_002343 | LTF | 1 |
| hsa-miR-1976 | NM_002343 | LTF | 1 |
| hsa-miR-2278 | NM_002343 | LTF | 1 |
| hsa-miR-718  | NM_002343 | LTF | 1 |
| hsa-miR-3120 | NM_002343 | LTF | 1 |
| hsa-miR-3127 | NM_002343 | LTF | 1 |
| hsa-miR-3131 | NM_002343 | LTF | 1 |
| hsa-miR-3147 | NM_002343 | LTF | 1 |
| hsa-miR-3154 | NM_002343 | LTF | 1 |
| hsa-miR-3156 | NM_002343 | LTF | 1 |
| hsa-miR-3162 | NM_002343 | LTF | 1 |
| hsa-miR-3162 | NM_002343 | LTF | 1 |
| hsa-miR-3173 | NM_002343 | LTF | 1 |
| hsa-miR-3177 | NM_002343 | LTF | 1 |
| hsa-miR-3192 | NM_002343 | LTF | 1 |
| hsa-miR-4300 | NM_002343 | LTF | 1 |
| hsa-miR-4316 | NM_002343 | LTF | 1 |
| hsa-miR-4266 | NM_002343 | LTF | 1 |
| hsa-miR-4270 | NM_002343 | LTF | 1 |
| hsa-miR-3605 | NM_002343 | LTF | 1 |
| hsa-miR-3620 | NM_002343 | LTF | 1 |
| hsa-miR-3665 | NM_002343 | LTF | 1 |
| hsa-miR-3675 | NM_002343 | LTF | 1 |
| hsa-miR-3917 | NM_002343 | LTF | 1 |
| hsa-miR-3922 | NM_002343 | LTF | 1 |
| hsa-miR-550b | NM_002343 | LTF | 1 |
| hsa-miR-4425 | NM_002343 | LTF | 1 |
| hsa-miR-4432 | NM_002343 | LTF | 1 |
| hsa-miR-4445 | NM_002343 | LTF | 1 |
| hsa-miR-3155 | NM_002343 | LTF | 1 |
| hsa-miR-4481 | NM_002343 | LTF | 1 |
| hsa-miR-4487 | NM_002343 | LTF | 1 |
| hsa-miR-4505 | NM_002343 | LTF | 1 |
| hsa-miR-4507 | NM_002343 | LTF | 1 |
| hsa-miR-4516 | NM_002343 | LTF | 1 |
| hsa-miR-4520 | NM_002343 | LTF | 1 |
| hsa-miR-4524 | NM_002343 | LTF | 1 |
| hsa-miR-4525 | NM_002343 | LTF | 1 |
| hsa-miR-4538 | NM_002343 | LTF | 1 |
| hsa-miR-4540 | NM_002343 | LTF | 1 |
| hsa-miR-4632 | NM_002343 | LTF | 1 |
| hsa-miR-4648 | NM_002343 | LTF | 1 |
| hsa-miR-4652 | NM_002343 | LTF | 1 |
| hsa-miR-4664 | NM_002343 | LTF | 1 |
| hsa-miR-4665 | NM_002343 | LTF | 1 |
| hsa-miR-4685 | NM_002343 | LTF | 1 |
| hsa-miR-4687 | NM_002343 | LTF | 1 |
| hsa-miR-4707 | NM_002343 | LTF | 1 |
| hsa-miR-4709 | NM_002343 | LTF | 1 |
| hsa-miR-4718 | NM_002343 | LTF | 1 |
| hsa-miR-4720 | NM_002343 | LTF | 1 |
| hsa-miR-4728 | NM_002343 | LTF | 1 |
| hsa-miR-4735 | NM_002343 | LTF | 1 |
| hsa-miR-4735 | NM_002343 | LTF | 1 |
| hsa-miR-4746 | NM_002343 | LTF | 1 |
| hsa-miR-4748 | NM_002343 | LTF | 1 |
| hsa-miR-4749 | NM_002343 | LTF | 1 |
| hsa-miR-4753 | NM_002343 | LTF | 1 |
| hsa-miR-4754 | NM_002343 | LTF | 1 |
| hsa-miR-4775 | NM_002343 | LTF | 1 |
| hsa-miR-4436 | NM_002343 | LTF | 1 |
| hsa-miR-4783 | NM_002343 | LTF | 1 |
| hsa-miR-4784 | NM_002343 | LTF | 1 |
| hsa-miR-4995 | NM_002343 | LTF | 1 |
| hsa-miR-5093 | NM_002343 | LTF | 1 |
| hsa-miR-5584 | NM_002343 | LTF | 1 |
| hsa-miR-5695 | NM_002343 | LTF | 1 |

|                          |     |   |
|--------------------------|-----|---|
| hsa-miR-5708 NM_002343   | LTF | 1 |
| hsa-miR-5787 NM_002343   | LTF | 1 |
| hsa-miR-6077 NM_002343   | LTF | 1 |
| hsa-miR-6085 NM_002343   | LTF | 1 |
| hsa-miR-6088 NM_002343   | LTF | 1 |
| hsa-miR-6088 NM_002343   | LTF | 1 |
| hsa-miR-6089 NM_002343   | LTF | 1 |
| hsa-miR-6090 NM_002343   | LTF | 1 |
| hsa-miR-6125 NM_002343   | LTF | 1 |
| hsa-miR-6125 NM_002343   | LTF | 1 |
| hsa-miR-6133 NM_002343   | LTF | 1 |
| hsa-miR-6500 NM_002343   | LTF | 1 |
| hsa-miR-6503 NM_002343   | LTF | 1 |
| hsa-miR-6507 NM_002343   | LTF | 1 |
| hsa-miR-6512 NM_002343   | LTF | 1 |
| hsa-miR-6515 NM_002343   | LTF | 1 |
| hsa-miR-6724 NM_002343   | LTF | 1 |
| hsa-miR-6726 NM_002343   | LTF | 1 |
| hsa-miR-6731 NM_002343   | LTF | 1 |
| hsa-miR-6738 NM_002343   | LTF | 1 |
| hsa-miR-6743 NM_002343   | LTF | 1 |
| hsa-miR-6748 NM_002343   | LTF | 1 |
| hsa-miR-6748 NM_002343   | LTF | 1 |
| hsa-miR-6748 NM_002343   | LTF | 1 |
| hsa-miR-6749 NM_002343   | LTF | 1 |
| hsa-miR-6752 NM_002343   | LTF | 1 |
| hsa-miR-6753 NM_002343   | LTF | 1 |
| hsa-miR-6754 NM_002343   | LTF | 1 |
| hsa-miR-6754 NM_002343   | LTF | 1 |
| hsa-miR-6756 NM_002343   | LTF | 1 |
| hsa-miR-6756 NM_002343   | LTF | 1 |
| hsa-miR-6759 NM_002343   | LTF | 1 |
| hsa-miR-6760 NM_002343   | LTF | 1 |
| hsa-miR-6771 NM_002343   | LTF | 1 |
| hsa-miR-6772 NM_002343   | LTF | 1 |
| hsa-miR-6774 NM_002343   | LTF | 1 |
| hsa-miR-6775 NM_002343   | LTF | 1 |
| hsa-miR-6776 NM_002343   | LTF | 1 |
| hsa-miR-6777 NM_002343   | LTF | 1 |
| hsa-miR-6779 NM_002343   | LTF | 1 |
| hsa-miR-6780 NM_002343   | LTF | 1 |
| hsa-miR-6786 NM_002343   | LTF | 1 |
| hsa-miR-6788 NM_002343   | LTF | 1 |
| hsa-miR-6790 NM_002343   | LTF | 1 |
| hsa-miR-6797 NM_002343   | LTF | 1 |
| hsa-miR-6798 NM_002343   | LTF | 1 |
| hsa-miR-6799 NM_002343   | LTF | 1 |
| hsa-miR-6799 NM_002343   | LTF | 1 |
| hsa-miR-6803 NM_002343   | LTF | 1 |
| hsa-miR-6804 NM_002343   | LTF | 1 |
| hsa-miR-6808 NM_002343   | LTF | 1 |
| hsa-miR-6809 NM_002343   | LTF | 1 |
| hsa-miR-6812 NM_002343   | LTF | 1 |
| hsa-miR-6813 NM_002343   | LTF | 1 |
| hsa-miR-6820 NM_002343   | LTF | 1 |
| hsa-miR-6822 NM_002343   | LTF | 1 |
| hsa-miR-6824 NM_002343   | LTF | 1 |
| hsa-miR-6825 NM_002343   | LTF | 1 |
| hsa-miR-6828 NM_002343   | LTF | 1 |
| hsa-miR-6830 NM_002343   | LTF | 1 |
| hsa-miR-6780 NM_002343   | LTF | 1 |
| hsa-miR-6842 NM_002343   | LTF | 1 |
| hsa-miR-6847 NM_002343   | LTF | 1 |
| hsa-miR-6850 NM_002343   | LTF | 1 |
| hsa-miR-6858 NM_002343   | LTF | 1 |
| hsa-miR-6861 NM_002343   | LTF | 1 |
| hsa-miR-6870 NM_002343   | LTF | 1 |
| hsa-miR-6875 NM_002343   | LTF | 1 |
| hsa-miR-6885 NM_002343   | LTF | 1 |
| hsa-miR-6885 NM_002343   | LTF | 1 |
| hsa-miR-6894 NM_002343   | LTF | 1 |
| hsa-miR-7106 NM_002343   | LTF | 1 |
| hsa-miR-7107 NM_002343   | LTF | 1 |
| hsa-miR-7109 NM_002343   | LTF | 1 |
| hsa-miR-7152 NM_002343   | LTF | 1 |
| hsa-miR-7155 NM_002343   | LTF | 1 |
| hsa-miR-7160 NM_002343   | LTF | 1 |
| hsa-miR-7160 NM_002343   | LTF | 1 |
| hsa-miR-7160 NM_002343   | LTF | 1 |
| hsa-miR-7515 NM_002343   | LTF | 1 |
| hsa-miR-1273 NM_002343   | LTF | 1 |
| hsa-miR-1273 NM_002343   | LTF | 1 |
| hsa-miR-7845 NM_002343   | LTF | 1 |
| hsa-miR-7974 NM_002343   | LTF | 1 |
| hsa-miR-8054 NM_002343   | LTF | 1 |
| hsa-miR-8072 NM_002343   | LTF | 1 |
| hsa-miR-1039 NM_002343   | LTF | 1 |
| hsa-miR-1039 NM_002343   | LTF | 1 |
| hsa-miR-1039 NM_002343   | LTF | 1 |
| hsa-miR-1118 NM_002343   | LTF | 1 |
| hsa-miR-1139 NM_002343   | LTF | 1 |
| hsa-miR-1211 NM_002343   | LTF | 1 |
| hsa-miR-1211 NM_002343   | LTF | 1 |
| hsa-miR-30c-1 NM_0013211 | LTF | 1 |
| hsa-miR-205-1 NM_0013211 | LTF | 1 |

|                        |            |     |   |
|------------------------|------------|-----|---|
| hsa-miR-212-NM_0013211 | LTF        | 1   |   |
| hsa-miR-223-NM_0013211 | LTF        | 1   |   |
| hsa-miR-125b           | NM_0013211 | LTF | 1 |
| hsa-miR-320a           | NM_0013211 | LTF | 1 |
| hsa-miR-296-NM_0013211 | LTF        | 1   |   |
| hsa-miR-365a           | NM_0013211 | LTF | 1 |
| hsa-miR-378a           | NM_0013211 | LTF | 1 |
| hsa-miR-425-NM_0013211 | LTF        | 1   |   |
| hsa-miR-483-NM_0013211 | LTF        | 1   |   |
| hsa-miR-490-NM_0013211 | LTF        | 1   |   |
| hsa-miR-502-NM_0013211 | LTF        | 1   |   |
| hsa-miR-544a           | NM_0013211 | LTF | 1 |
| hsa-miR-487b           | NM_0013211 | LTF | 1 |
| hsa-miR-554            | NM_0013211 | LTF | 1 |
| hsa-miR-573            | NM_0013211 | LTF | 1 |
| hsa-miR-574-NM_0013211 | LTF        | 1   |   |
| hsa-miR-550a           | NM_0013211 | LTF | 1 |
| hsa-miR-550a           | NM_0013211 | LTF | 1 |
| hsa-miR-647            | NM_0013211 | LTF | 1 |
| hsa-miR-550a           | NM_0013211 | LTF | 1 |
| hsa-miR-1296           | NM_0013211 | LTF | 1 |
| hsa-miR-1185           | NM_0013211 | LTF | 1 |
| hsa-miR-874-NM_0013211 | LTF        | 1   |   |
| hsa-miR-543            | NM_0013211 | LTF | 1 |
| hsa-miR-920            | NM_0013211 | LTF | 1 |
| hsa-miR-920            | NM_0013211 | LTF | 1 |
| hsa-miR-936            | NM_0013211 | LTF | 1 |
| hsa-miR-1183           | NM_0013211 | LTF | 1 |
| hsa-miR-1228           | NM_0013211 | LTF | 1 |
| hsa-miR-1233           | NM_0013211 | LTF | 1 |
| hsa-miR-1289           | NM_0013211 | LTF | 1 |
| hsa-miR-1289           | NM_0013211 | LTF | 1 |
| hsa-miR-1244           | NM_0013211 | LTF | 1 |
| hsa-miR-1249           | NM_0013211 | LTF | 1 |
| hsa-miR-1250           | NM_0013211 | LTF | 1 |
| hsa-miR-1250           | NM_0013211 | LTF | 1 |
| hsa-miR-1251           | NM_0013211 | LTF | 1 |
| hsa-miR-1266           | NM_0013211 | LTF | 1 |
| hsa-miR-1266           | NM_0013211 | LTF | 1 |
| hsa-miR-1275           | NM_0013211 | LTF | 1 |
| hsa-miR-1282           | NM_0013211 | LTF | 1 |
| hsa-miR-1469           | NM_0013211 | LTF | 1 |
| hsa-miR-1908           | NM_0013211 | LTF | 1 |
| hsa-miR-1976           | NM_0013211 | LTF | 1 |
| hsa-miR-2278           | NM_0013211 | LTF | 1 |
| hsa-miR-718            | NM_0013211 | LTF | 1 |
| hsa-miR-3120           | NM_0013211 | LTF | 1 |
| hsa-miR-3127           | NM_0013211 | LTF | 1 |
| hsa-miR-3131           | NM_0013211 | LTF | 1 |
| hsa-miR-3147           | NM_0013211 | LTF | 1 |
| hsa-miR-3154           | NM_0013211 | LTF | 1 |
| hsa-miR-3156           | NM_0013211 | LTF | 1 |
| hsa-miR-3162           | NM_0013211 | LTF | 1 |
| hsa-miR-3162           | NM_0013211 | LTF | 1 |
| hsa-miR-3173           | NM_0013211 | LTF | 1 |
| hsa-miR-3177           | NM_0013211 | LTF | 1 |
| hsa-miR-3192           | NM_0013211 | LTF | 1 |
| hsa-miR-4300           | NM_0013211 | LTF | 1 |
| hsa-miR-4316           | NM_0013211 | LTF | 1 |
| hsa-miR-4266           | NM_0013211 | LTF | 1 |
| hsa-miR-4270           | NM_0013211 | LTF | 1 |
| hsa-miR-3609           | NM_0013211 | LTF | 1 |
| hsa-miR-3620           | NM_0013211 | LTF | 1 |
| hsa-miR-3665           | NM_0013211 | LTF | 1 |
| hsa-miR-3675           | NM_0013211 | LTF | 1 |
| hsa-miR-3917           | NM_0013211 | LTF | 1 |
| hsa-miR-3922           | NM_0013211 | LTF | 1 |
| hsa-miR-550b           | NM_0013211 | LTF | 1 |
| hsa-miR-4425           | NM_0013211 | LTF | 1 |
| hsa-miR-4432           | NM_0013211 | LTF | 1 |
| hsa-miR-4445           | NM_0013211 | LTF | 1 |
| hsa-miR-3155           | NM_0013211 | LTF | 1 |
| hsa-miR-4481           | NM_0013211 | LTF | 1 |
| hsa-miR-4487           | NM_0013211 | LTF | 1 |
| hsa-miR-4505           | NM_0013211 | LTF | 1 |
| hsa-miR-4507           | NM_0013211 | LTF | 1 |
| hsa-miR-4516           | NM_0013211 | LTF | 1 |
| hsa-miR-4520           | NM_0013211 | LTF | 1 |
| hsa-miR-4524           | NM_0013211 | LTF | 1 |
| hsa-miR-4525           | NM_0013211 | LTF | 1 |
| hsa-miR-4538           | NM_0013211 | LTF | 1 |
| hsa-miR-4540           | NM_0013211 | LTF | 1 |
| hsa-miR-4632           | NM_0013211 | LTF | 1 |
| hsa-miR-4648           | NM_0013211 | LTF | 1 |
| hsa-miR-4652           | NM_0013211 | LTF | 1 |
| hsa-miR-4664           | NM_0013211 | LTF | 1 |
| hsa-miR-4665           | NM_0013211 | LTF | 1 |
| hsa-miR-4685           | NM_0013211 | LTF | 1 |
| hsa-miR-4687           | NM_0013211 | LTF | 1 |
| hsa-miR-4707           | NM_0013211 | LTF | 1 |
| hsa-miR-4709           | NM_0013211 | LTF | 1 |
| hsa-miR-4718           | NM_0013211 | LTF | 1 |
| hsa-miR-4720           | NM_0013211 | LTF | 1 |
| hsa-miR-4728           | NM_0013211 | LTF | 1 |
| hsa-miR-4739           | NM_0013211 | LTF | 1 |
| hsa-miR-4739           | NM_0013211 | LTF | 1 |

|                             |   |
|-----------------------------|---|
| hsa-miR-4746 NM_0013211 LTF | 1 |
| hsa-miR-4748 NM_0013211 LTF | 1 |
| hsa-miR-4749 NM_0013211 LTF | 1 |
| hsa-miR-4753 NM_0013211 LTF | 1 |
| hsa-miR-4754 NM_0013211 LTF | 1 |
| hsa-miR-4779 NM_0013211 LTF | 1 |
| hsa-miR-4436 NM_0013211 LTF | 1 |
| hsa-miR-4783 NM_0013211 LTF | 1 |
| hsa-miR-4784 NM_0013211 LTF | 1 |
| hsa-miR-4995 NM_0013211 LTF | 1 |
| hsa-miR-5093 NM_0013211 LTF | 1 |
| hsa-miR-5584 NM_0013211 LTF | 1 |
| hsa-miR-5695 NM_0013211 LTF | 1 |
| hsa-miR-5708 NM_0013211 LTF | 1 |
| hsa-miR-5787 NM_0013211 LTF | 1 |
| hsa-miR-6077 NM_0013211 LTF | 1 |
| hsa-miR-6085 NM_0013211 LTF | 1 |
| hsa-miR-6088 NM_0013211 LTF | 1 |
| hsa-miR-6088 NM_0013211 LTF | 1 |
| hsa-miR-6085 NM_0013211 LTF | 1 |
| hsa-miR-609C NM_0013211 LTF | 1 |
| hsa-miR-6125 NM_0013211 LTF | 1 |
| hsa-miR-6125 NM_0013211 LTF | 1 |
| hsa-miR-6133 NM_0013211 LTF | 1 |
| hsa-miR-650C NM_0013211 LTF | 1 |
| hsa-miR-6503 NM_0013211 LTF | 1 |
| hsa-miR-6507 NM_0013211 LTF | 1 |
| hsa-miR-6512 NM_0013211 LTF | 1 |
| hsa-miR-6515 NM_0013211 LTF | 1 |
| hsa-miR-6724 NM_0013211 LTF | 1 |
| hsa-miR-6726 NM_0013211 LTF | 1 |
| hsa-miR-6731 NM_0013211 LTF | 1 |
| hsa-miR-6738 NM_0013211 LTF | 1 |
| hsa-miR-6743 NM_0013211 LTF | 1 |
| hsa-miR-6748 NM_0013211 LTF | 1 |
| hsa-miR-6748 NM_0013211 LTF | 1 |
| hsa-miR-6749 NM_0013211 LTF | 1 |
| hsa-miR-6752 NM_0013211 LTF | 1 |
| hsa-miR-6753 NM_0013211 LTF | 1 |
| hsa-miR-6754 NM_0013211 LTF | 1 |
| hsa-miR-6754 NM_0013211 LTF | 1 |
| hsa-miR-6756 NM_0013211 LTF | 1 |
| hsa-miR-6756 NM_0013211 LTF | 1 |
| hsa-miR-6759 NM_0013211 LTF | 1 |
| hsa-miR-676C NM_0013211 LTF | 1 |
| hsa-miR-6771 NM_0013211 LTF | 1 |
| hsa-miR-6772 NM_0013211 LTF | 1 |
| hsa-miR-6774 NM_0013211 LTF | 1 |
| hsa-miR-6775 NM_0013211 LTF | 1 |
| hsa-miR-6776 NM_0013211 LTF | 1 |
| hsa-miR-6777 NM_0013211 LTF | 1 |
| hsa-miR-6779 NM_0013211 LTF | 1 |
| hsa-miR-678C NM_0013211 LTF | 1 |
| hsa-miR-6786 NM_0013211 LTF | 1 |
| hsa-miR-6788 NM_0013211 LTF | 1 |
| hsa-miR-679C NM_0013211 LTF | 1 |
| hsa-miR-6797 NM_0013211 LTF | 1 |
| hsa-miR-6798 NM_0013211 LTF | 1 |
| hsa-miR-6799 NM_0013211 LTF | 1 |
| hsa-miR-6799 NM_0013211 LTF | 1 |
| hsa-miR-6803 NM_0013211 LTF | 1 |
| hsa-miR-6804 NM_0013211 LTF | 1 |
| hsa-miR-6808 NM_0013211 LTF | 1 |
| hsa-miR-6809 NM_0013211 LTF | 1 |
| hsa-miR-6812 NM_0013211 LTF | 1 |
| hsa-miR-6813 NM_0013211 LTF | 1 |
| hsa-miR-682C NM_0013211 LTF | 1 |
| hsa-miR-6822 NM_0013211 LTF | 1 |
| hsa-miR-6824 NM_0013211 LTF | 1 |
| hsa-miR-6825 NM_0013211 LTF | 1 |
| hsa-miR-6828 NM_0013211 LTF | 1 |
| hsa-miR-683C NM_0013211 LTF | 1 |
| hsa-miR-678C NM_0013211 LTF | 1 |
| hsa-miR-6842 NM_0013211 LTF | 1 |
| hsa-miR-6847 NM_0013211 LTF | 1 |
| hsa-miR-685C NM_0013211 LTF | 1 |
| hsa-miR-6858 NM_0013211 LTF | 1 |
| hsa-miR-6861 NM_0013211 LTF | 1 |
| hsa-miR-687C NM_0013211 LTF | 1 |
| hsa-miR-6875 NM_0013211 LTF | 1 |
| hsa-miR-6885 NM_0013211 LTF | 1 |
| hsa-miR-6885 NM_0013211 LTF | 1 |
| hsa-miR-6894 NM_0013211 LTF | 1 |
| hsa-miR-7106 NM_0013211 LTF | 1 |
| hsa-miR-7107 NM_0013211 LTF | 1 |
| hsa-miR-7109 NM_0013211 LTF | 1 |
| hsa-miR-7152 NM_0013211 LTF | 1 |
| hsa-miR-7155 NM_0013211 LTF | 1 |
| hsa-miR-716C NM_0013211 LTF | 1 |
| hsa-miR-716C NM_0013211 LTF | 1 |
| hsa-miR-716C NM_0013211 LTF | 1 |
| hsa-miR-7515 NM_0013211 LTF | 1 |
| hsa-miR-1273 NM_0013211 LTF | 1 |
| hsa-miR-1273 NM_0013211 LTF | 1 |

|                              |   |
|------------------------------|---|
| hsa-miR-7845 NM_0013211 LTF  | 1 |
| hsa-miR-7974 NM_0013211 LTF  | 1 |
| hsa-miR-8054 NM_0013211 LTF  | 1 |
| hsa-miR-8072 NM_0013211 LTF  | 1 |
| hsa-miR-1039 NM_0013211 LTF  | 1 |
| hsa-miR-1039 NM_0013211 LTF  | 1 |
| hsa-miR-1039 NM_0013211 LTF  | 1 |
| hsa-miR-1118 NM_0013211 LTF  | 1 |
| hsa-miR-1139 NM_0013211 LTF  | 1 |
| hsa-miR-1211 NM_0013211 LTF  | 1 |
| hsa-miR-1211 NM_0013211 LTF  | 1 |
| hsa-miR-25-5j NM_0013211 LTF | 1 |
| hsa-miR-30c-1 NM_0013211 LTF | 1 |
| hsa-miR-205-1 NM_0013211 LTF | 1 |
| hsa-miR-212-1 NM_0013211 LTF | 1 |
| hsa-miR-223-1 NM_0013211 LTF | 1 |
| hsa-miR-149-1 NM_0013211 LTF | 1 |
| hsa-miR-320a NM_0013211 LTF  | 1 |
| hsa-miR-365a NM_0013211 LTF  | 1 |
| hsa-miR-378a NM_0013211 LTF  | 1 |
| hsa-miR-324-1 NM_0013211 LTF | 1 |
| hsa-miR-425-1 NM_0013211 LTF | 1 |
| hsa-miR-329-1 NM_0013211 LTF | 1 |
| hsa-miR-520a NM_0013211 LTF  | 1 |
| hsa-miR-502-1 NM_0013211 LTF | 1 |
| hsa-miR-450a NM_0013211 LTF  | 1 |
| hsa-miR-532-1 NM_0013211 LTF | 1 |
| hsa-miR-532-1 NM_0013211 LTF | 1 |
| hsa-miR-487b NM_0013211 LTF  | 1 |
| hsa-miR-574-1 NM_0013211 LTF | 1 |
| hsa-miR-550a NM_0013211 LTF  | 1 |
| hsa-miR-550a NM_0013211 LTF  | 1 |
| hsa-miR-601 NM_0013211 LTF   | 1 |
| hsa-miR-647 NM_0013211 LTF   | 1 |
| hsa-miR-1185 NM_0013211 LTF  | 1 |
| hsa-miR-1185 NM_0013211 LTF  | 1 |
| hsa-miR-543 NM_0013211 LTF   | 1 |
| hsa-miR-920 NM_0013211 LTF   | 1 |
| hsa-miR-936 NM_0013211 LTF   | 1 |
| hsa-miR-942-1 NM_0013211 LTF | 1 |
| hsa-miR-297 NM_0013211 LTF   | 1 |
| hsa-miR-1228 NM_0013211 LTF  | 1 |
| hsa-miR-1233 NM_0013211 LTF  | 1 |
| hsa-miR-663b NM_0013211 LTF  | 1 |
| hsa-miR-1249 NM_0013211 LTF  | 1 |
| hsa-miR-1250 NM_0013211 LTF  | 1 |
| hsa-miR-1251 NM_0013211 LTF  | 1 |
| hsa-miR-1266 NM_0013211 LTF  | 1 |
| hsa-miR-1266 NM_0013211 LTF  | 1 |
| hsa-miR-1275 NM_0013211 LTF  | 1 |
| hsa-miR-1275 NM_0013211 LTF  | 1 |
| hsa-miR-1976 NM_0013211 LTF  | 1 |
| hsa-miR-2909 NM_0013211 LTF  | 1 |
| hsa-miR-3131 NM_0013211 LTF  | 1 |
| hsa-miR-3169 NM_0013211 LTF  | 1 |
| hsa-miR-3173 NM_0013211 LTF  | 1 |
| hsa-miR-3177 NM_0013211 LTF  | 1 |
| hsa-miR-3177 NM_0013211 LTF  | 1 |
| hsa-miR-4298 NM_0013211 LTF  | 1 |
| hsa-miR-4300 NM_0013211 LTF  | 1 |
| hsa-miR-4313 NM_0013211 LTF  | 1 |
| hsa-miR-4270 NM_0013211 LTF  | 1 |
| hsa-miR-3609 NM_0013211 LTF  | 1 |
| hsa-miR-3665 NM_0013211 LTF  | 1 |
| hsa-miR-3922 NM_0013211 LTF  | 1 |
| hsa-miR-550b NM_0013211 LTF  | 1 |
| hsa-miR-4425 NM_0013211 LTF  | 1 |
| hsa-miR-4432 NM_0013211 LTF  | 1 |
| hsa-miR-4433 NM_0013211 LTF  | 1 |
| hsa-miR-4445 NM_0013211 LTF  | 1 |
| hsa-miR-4446 NM_0013211 LTF  | 1 |
| hsa-miR-4463 NM_0013211 LTF  | 1 |
| hsa-miR-3155 NM_0013211 LTF  | 1 |
| hsa-miR-4481 NM_0013211 LTF  | 1 |
| hsa-miR-4481 NM_0013211 LTF  | 1 |
| hsa-miR-4486 NM_0013211 LTF  | 1 |
| hsa-miR-4487 NM_0013211 LTF  | 1 |
| hsa-miR-4488 NM_0013211 LTF  | 1 |
| hsa-miR-4506 NM_0013211 LTF  | 1 |
| hsa-miR-4507 NM_0013211 LTF  | 1 |
| hsa-miR-4516 NM_0013211 LTF  | 1 |
| hsa-miR-4525 NM_0013211 LTF  | 1 |
| hsa-miR-4526 NM_0013211 LTF  | 1 |
| hsa-miR-4538 NM_0013211 LTF  | 1 |
| hsa-miR-4540 NM_0013211 LTF  | 1 |
| hsa-miR-4654 NM_0013211 LTF  | 1 |
| hsa-miR-4655 NM_0013211 LTF  | 1 |
| hsa-miR-4657 NM_0013211 LTF  | 1 |
| hsa-miR-4665 NM_0013211 LTF  | 1 |
| hsa-miR-4685 NM_0013211 LTF  | 1 |
| hsa-miR-4686 NM_0013211 LTF  | 1 |
| hsa-miR-4709 NM_0013211 LTF  | 1 |
| hsa-miR-4738 NM_0013211 LTF  | 1 |
| hsa-miR-4739 NM_0013211 LTF  | 1 |

|                              |   |
|------------------------------|---|
| hsa-miR-4746 NM_0013211 LTF  | 1 |
| hsa-miR-4748 NM_0013211 LTF  | 1 |
| hsa-miR-4749 NM_0013211 LTF  | 1 |
| hsa-miR-4750 NM_0013211 LTF  | 1 |
| hsa-miR-4753 NM_0013211 LTF  | 1 |
| hsa-miR-4755 NM_0013211 LTF  | 1 |
| hsa-miR-4436 NM_0013211 LTF  | 1 |
| hsa-miR-4783 NM_0013211 LTF  | 1 |
| hsa-miR-4784 NM_0013211 LTF  | 1 |
| hsa-miR-4786 NM_0013211 LTF  | 1 |
| hsa-miR-5000 NM_0013211 LTF  | 1 |
| hsa-miR-5194 NM_0013211 LTF  | 1 |
| hsa-miR-5584 NM_0013211 LTF  | 1 |
| hsa-miR-5695 NM_0013211 LTF  | 1 |
| hsa-miR-5787 NM_0013211 LTF  | 1 |
| hsa-miR-6077 NM_0013211 LTF  | 1 |
| hsa-miR-6078 NM_0013211 LTF  | 1 |
| hsa-miR-6085 NM_0013211 LTF  | 1 |
| hsa-miR-6088 NM_0013211 LTF  | 1 |
| hsa-miR-6088 NM_0013211 LTF  | 1 |
| hsa-miR-6090 NM_0013211 LTF  | 1 |
| hsa-miR-6125 NM_0013211 LTF  | 1 |
| hsa-miR-6127 NM_0013211 LTF  | 1 |
| hsa-miR-6129 NM_0013211 LTF  | 1 |
| hsa-miR-6130 NM_0013211 LTF  | 1 |
| hsa-miR-6133 NM_0013211 LTF  | 1 |
| hsa-miR-6500 NM_0013211 LTF  | 1 |
| hsa-miR-6507 NM_0013211 LTF  | 1 |
| hsa-miR-6512 NM_0013211 LTF  | 1 |
| hsa-miR-6515 NM_0013211 LTF  | 1 |
| hsa-miR-6726 NM_0013211 LTF  | 1 |
| hsa-miR-6730 NM_0013211 LTF  | 1 |
| hsa-miR-6731 NM_0013211 LTF  | 1 |
| hsa-miR-6731 NM_0013211 LTF  | 1 |
| hsa-miR-6738 NM_0013211 LTF  | 1 |
| hsa-miR-6739 NM_0013211 LTF  | 1 |
| hsa-miR-6743 NM_0013211 LTF  | 1 |
| hsa-miR-6748 NM_0013211 LTF  | 1 |
| hsa-miR-6753 NM_0013211 LTF  | 1 |
| hsa-miR-6754 NM_0013211 LTF  | 1 |
| hsa-miR-6757 NM_0013211 LTF  | 1 |
| hsa-miR-6771 NM_0013211 LTF  | 1 |
| hsa-miR-6776 NM_0013211 LTF  | 1 |
| hsa-miR-6779 NM_0013211 LTF  | 1 |
| hsa-miR-6780 NM_0013211 LTF  | 1 |
| hsa-miR-6780 NM_0013211 LTF  | 1 |
| hsa-miR-6796 NM_0013211 LTF  | 1 |
| hsa-miR-6797 NM_0013211 LTF  | 1 |
| hsa-miR-6799 NM_0013211 LTF  | 1 |
| hsa-miR-6803 NM_0013211 LTF  | 1 |
| hsa-miR-6809 NM_0013211 LTF  | 1 |
| hsa-miR-6820 NM_0013211 LTF  | 1 |
| hsa-miR-6820 NM_0013211 LTF  | 1 |
| hsa-miR-6822 NM_0013211 LTF  | 1 |
| hsa-miR-6824 NM_0013211 LTF  | 1 |
| hsa-miR-6825 NM_0013211 LTF  | 1 |
| hsa-miR-6780 NM_0013211 LTF  | 1 |
| hsa-miR-6856 NM_0013211 LTF  | 1 |
| hsa-miR-6858 NM_0013211 LTF  | 1 |
| hsa-miR-6875 NM_0013211 LTF  | 1 |
| hsa-miR-6885 NM_0013211 LTF  | 1 |
| hsa-miR-6885 NM_0013211 LTF  | 1 |
| hsa-miR-6894 NM_0013211 LTF  | 1 |
| hsa-miR-7106 NM_0013211 LTF  | 1 |
| hsa-miR-7107 NM_0013211 LTF  | 1 |
| hsa-miR-7109 NM_0013211 LTF  | 1 |
| hsa-miR-7152 NM_0013211 LTF  | 1 |
| hsa-miR-7155 NM_0013211 LTF  | 1 |
| hsa-miR-4433 NM_0013211 LTF  | 1 |
| hsa-miR-1273 NM_0013211 LTF  | 1 |
| hsa-miR-7845 NM_0013211 LTF  | 1 |
| hsa-miR-8073 NM_0013211 LTF  | 1 |
| hsa-miR-1039 NM_0013211 LTF  | 1 |
| hsa-miR-1039 NM_0013211 LTF  | 1 |
| hsa-miR-1118 NM_0013211 LTF  | 1 |
| hsa-miR-1211 NM_0013211 LTF  | 1 |
| hsa-miR-1212 NM_0013211 LTF  | 1 |
| hsa-miR-1212 NM_0013211 LTF  | 1 |
| hsa-miR-23a-1 NM_0011991 LTF | 1 |
| hsa-miR-198 NM_0011991 LTF   | 1 |
| hsa-miR-30c-1 NM_0011991 LTF | 1 |
| hsa-miR-212-1 NM_0011991 LTF | 1 |
| hsa-miR-223-1 NM_0011991 LTF | 1 |
| hsa-miR-125b NM_0011991 LTF  | 1 |
| hsa-miR-296-1 NM_0011991 LTF | 1 |
| hsa-miR-324-1 NM_0011991 LTF | 1 |
| hsa-miR-425-1 NM_0011991 LTF | 1 |
| hsa-miR-450a NM_0011991 LTF  | 1 |
| hsa-miR-532-1 NM_0011991 LTF | 1 |
| hsa-miR-544a NM_0011991 LTF  | 1 |
| hsa-miR-487b NM_0011991 LTF  | 1 |
| hsa-miR-573 NM_0011991 LTF   | 1 |
| hsa-miR-574-1 NM_0011991 LTF | 1 |
| hsa-miR-584-1 NM_0011991 LTF | 1 |
| hsa-miR-550a NM_0011991 LTF  | 1 |

|              |            |     |   |
|--------------|------------|-----|---|
| hsa-miR-601  | NM_0011991 | LTF | 1 |
| hsa-miR-647  | NM_0011991 | LTF | 1 |
| hsa-miR-1296 | NM_0011991 | LTF | 1 |
| hsa-miR-1185 | NM_0011991 | LTF | 1 |
| hsa-miR-874- | NM_0011991 | LTF | 1 |
| hsa-miR-936  | NM_0011991 | LTF | 1 |
| hsa-miR-942- | NM_0011991 | LTF | 1 |
| hsa-miR-1182 | NM_0011991 | LTF | 1 |
| hsa-miR-1183 | NM_0011991 | LTF | 1 |
| hsa-miR-1228 | NM_0011991 | LTF | 1 |
| hsa-miR-1233 | NM_0011991 | LTF | 1 |
| hsa-miR-1289 | NM_0011991 | LTF | 1 |
| hsa-miR-1249 | NM_0011991 | LTF | 1 |
| hsa-miR-1250 | NM_0011991 | LTF | 1 |
| hsa-miR-1251 | NM_0011991 | LTF | 1 |
| hsa-miR-1266 | NM_0011991 | LTF | 1 |
| hsa-miR-1266 | NM_0011991 | LTF | 1 |
| hsa-miR-1275 | NM_0011991 | LTF | 1 |
| hsa-miR-1275 | NM_0011991 | LTF | 1 |
| hsa-miR-1282 | NM_0011991 | LTF | 1 |
| hsa-miR-1292 | NM_0011991 | LTF | 1 |
| hsa-miR-1469 | NM_0011991 | LTF | 1 |
| hsa-miR-1908 | NM_0011991 | LTF | 1 |
| hsa-miR-1909 | NM_0011991 | LTF | 1 |
| hsa-miR-1976 | NM_0011991 | LTF | 1 |
| hsa-miR-2276 | NM_0011991 | LTF | 1 |
| hsa-miR-718  | NM_0011991 | LTF | 1 |
| hsa-miR-2909 | NM_0011991 | LTF | 1 |
| hsa-miR-3131 | NM_0011991 | LTF | 1 |
| hsa-miR-3147 | NM_0011991 | LTF | 1 |
| hsa-miR-3154 | NM_0011991 | LTF | 1 |
| hsa-miR-3162 | NM_0011991 | LTF | 1 |
| hsa-miR-3173 | NM_0011991 | LTF | 1 |
| hsa-miR-3177 | NM_0011991 | LTF | 1 |
| hsa-miR-3177 | NM_0011991 | LTF | 1 |
| hsa-miR-4298 | NM_0011991 | LTF | 1 |
| hsa-miR-4313 | NM_0011991 | LTF | 1 |
| hsa-miR-4266 | NM_0011991 | LTF | 1 |
| hsa-miR-4270 | NM_0011991 | LTF | 1 |
| hsa-miR-4281 | NM_0011991 | LTF | 1 |
| hsa-miR-3609 | NM_0011991 | LTF | 1 |
| hsa-miR-3620 | NM_0011991 | LTF | 1 |
| hsa-miR-3665 | NM_0011991 | LTF | 1 |
| hsa-miR-3675 | NM_0011991 | LTF | 1 |
| hsa-miR-3922 | NM_0011991 | LTF | 1 |
| hsa-miR-550b | NM_0011991 | LTF | 1 |
| hsa-miR-4425 | NM_0011991 | LTF | 1 |
| hsa-miR-4432 | NM_0011991 | LTF | 1 |
| hsa-miR-4433 | NM_0011991 | LTF | 1 |
| hsa-miR-4446 | NM_0011991 | LTF | 1 |
| hsa-miR-3155 | NM_0011991 | LTF | 1 |
| hsa-miR-4481 | NM_0011991 | LTF | 1 |
| hsa-miR-4487 | NM_0011991 | LTF | 1 |
| hsa-miR-4507 | NM_0011991 | LTF | 1 |
| hsa-miR-4516 | NM_0011991 | LTF | 1 |
| hsa-miR-4518 | NM_0011991 | LTF | 1 |
| hsa-miR-4525 | NM_0011991 | LTF | 1 |
| hsa-miR-1587 | NM_0011991 | LTF | 1 |
| hsa-miR-4632 | NM_0011991 | LTF | 1 |
| hsa-miR-4648 | NM_0011991 | LTF | 1 |
| hsa-miR-4664 | NM_0011991 | LTF | 1 |
| hsa-miR-4665 | NM_0011991 | LTF | 1 |
| hsa-miR-4685 | NM_0011991 | LTF | 1 |
| hsa-miR-4707 | NM_0011991 | LTF | 1 |
| hsa-miR-4720 | NM_0011991 | LTF | 1 |
| hsa-miR-4725 | NM_0011991 | LTF | 1 |
| hsa-miR-4728 | NM_0011991 | LTF | 1 |
| hsa-miR-4738 | NM_0011991 | LTF | 1 |
| hsa-miR-4739 | NM_0011991 | LTF | 1 |
| hsa-miR-4748 | NM_0011991 | LTF | 1 |
| hsa-miR-4753 | NM_0011991 | LTF | 1 |
| hsa-miR-4779 | NM_0011991 | LTF | 1 |
| hsa-miR-4436 | NM_0011991 | LTF | 1 |
| hsa-miR-4783 | NM_0011991 | LTF | 1 |
| hsa-miR-4787 | NM_0011991 | LTF | 1 |
| hsa-miR-5000 | NM_0011991 | LTF | 1 |
| hsa-miR-5584 | NM_0011991 | LTF | 1 |
| hsa-miR-5681 | NM_0011991 | LTF | 1 |
| hsa-miR-5699 | NM_0011991 | LTF | 1 |
| hsa-miR-5708 | NM_0011991 | LTF | 1 |
| hsa-miR-5787 | NM_0011991 | LTF | 1 |
| hsa-miR-6077 | NM_0011991 | LTF | 1 |
| hsa-miR-6077 | NM_0011991 | LTF | 1 |
| hsa-miR-6078 | NM_0011991 | LTF | 1 |
| hsa-miR-6088 | NM_0011991 | LTF | 1 |
| hsa-miR-6088 | NM_0011991 | LTF | 1 |
| hsa-miR-6127 | NM_0011991 | LTF | 1 |
| hsa-miR-6129 | NM_0011991 | LTF | 1 |
| hsa-miR-6130 | NM_0011991 | LTF | 1 |
| hsa-miR-6133 | NM_0011991 | LTF | 1 |
| hsa-miR-6500 | NM_0011991 | LTF | 1 |
| hsa-miR-6507 | NM_0011991 | LTF | 1 |
| hsa-miR-6512 | NM_0011991 | LTF | 1 |
| hsa-miR-6515 | NM_0011991 | LTF | 1 |

|                              |            |
|------------------------------|------------|
| hsa-miR-6724 NM_0011991 LTF  | 1          |
| hsa-miR-6726 NM_0011991 LTF  | 1          |
| hsa-miR-6727 NM_0011991 LTF  | 1          |
| hsa-miR-6730 NM_0011991 LTF  | 1          |
| hsa-miR-6738 NM_0011991 LTF  | 1          |
| hsa-miR-6743 NM_0011991 LTF  | 1          |
| hsa-miR-6745 NM_0011991 LTF  | 1          |
| hsa-miR-6753 NM_0011991 LTF  | 1          |
| hsa-miR-6754 NM_0011991 LTF  | 1          |
| hsa-miR-6756 NM_0011991 LTF  | 1          |
| hsa-miR-6760 NM_0011991 LTF  | 1          |
| hsa-miR-6772 NM_0011991 LTF  | 1          |
| hsa-miR-6775 NM_0011991 LTF  | 1          |
| hsa-miR-6776 NM_0011991 LTF  | 1          |
| hsa-miR-6775 NM_0011991 LTF  | 1          |
| hsa-miR-6780 NM_0011991 LTF  | 1          |
| hsa-miR-6785 NM_0011991 LTF  | 1          |
| hsa-miR-6787 NM_0011991 LTF  | 1          |
| hsa-miR-6788 NM_0011991 LTF  | 1          |
| hsa-miR-6795 NM_0011991 LTF  | 1          |
| hsa-miR-6795 NM_0011991 LTF  | 1          |
| hsa-miR-6801 NM_0011991 LTF  | 1          |
| hsa-miR-6803 NM_0011991 LTF  | 1          |
| hsa-miR-6804 NM_0011991 LTF  | 1          |
| hsa-miR-6808 NM_0011991 LTF  | 1          |
| hsa-miR-6805 NM_0011991 LTF  | 1          |
| hsa-miR-6813 NM_0011991 LTF  | 1          |
| hsa-miR-6820 NM_0011991 LTF  | 1          |
| hsa-miR-6822 NM_0011991 LTF  | 1          |
| hsa-miR-6824 NM_0011991 LTF  | 1          |
| hsa-miR-6825 NM_0011991 LTF  | 1          |
| hsa-miR-6780 NM_0011991 LTF  | 1          |
| hsa-miR-6837 NM_0011991 LTF  | 1          |
| hsa-miR-6847 NM_0011991 LTF  | 1          |
| hsa-miR-6858 NM_0011991 LTF  | 1          |
| hsa-miR-6861 NM_0011991 LTF  | 1          |
| hsa-miR-6885 NM_0011991 LTF  | 1          |
| hsa-miR-6894 NM_0011991 LTF  | 1          |
| hsa-miR-7106 NM_0011991 LTF  | 1          |
| hsa-miR-7107 NM_0011991 LTF  | 1          |
| hsa-miR-7152 NM_0011991 LTF  | 1          |
| hsa-miR-7160 NM_0011991 LTF  | 1          |
| hsa-miR-7160 NM_0011991 LTF  | 1          |
| hsa-miR-4433 NM_0011991 LTF  | 1          |
| hsa-miR-1273 NM_0011991 LTF  | 1          |
| hsa-miR-8052 NM_0011991 LTF  | 1          |
| hsa-miR-8054 NM_0011991 LTF  | 1          |
| hsa-miR-8072 NM_0011991 LTF  | 1          |
| hsa-miR-1039 NM_0011991 LTF  | 1          |
| hsa-miR-1118 NM_0011991 LTF  | 1          |
| hsa-miR-1211 NM_0011991 LTF  | 1          |
| hsa-miR-1211 NM_0011991 LTF  | 1          |
| hsa-miR-1212 NM_0011991 LTF  | 1          |
| hsa-miR-4695 NM_001200 BMP2  | 0.96153846 |
| hsa-miR-4731 NM_001200 BMP2  | 0.96153846 |
| hsa-miR-3141 NM_001200 BMP2  | 0.98076923 |
| hsa-let-7e-5p NM_001200 BMP2 | 1          |
| hsa-miR-27a- NM_001200 BMP2  | 1          |
| hsa-miR-183- NM_001200 BMP2  | 1          |
| hsa-miR-185- NM_001200 BMP2  | 1          |
| hsa-miR-376c NM_001200 BMP2  | 1          |
| hsa-miR-328- NM_001200 BMP2  | 1          |
| hsa-miR-423- NM_001200 BMP2  | 1          |
| hsa-miR-432- NM_001200 BMP2  | 1          |
| hsa-miR-510- NM_001200 BMP2  | 1          |
| hsa-miR-514a NM_001200 BMP2  | 1          |
| hsa-miR-610 NM_001200 BMP2   | 1          |
| hsa-miR-654- NM_001200 BMP2  | 1          |
| hsa-miR-378d NM_001200 BMP2  | 1          |
| hsa-miR-936 NM_001200 BMP2   | 1          |
| hsa-miR-1286 NM_001200 BMP2  | 1          |
| hsa-miR-1270 NM_001200 BMP2  | 1          |
| hsa-miR-2114 NM_001200 BMP2  | 1          |
| hsa-miR-3138 NM_001200 BMP2  | 1          |
| hsa-miR-3135 NM_001200 BMP2  | 1          |
| hsa-miR-3162 NM_001200 BMP2  | 1          |
| hsa-miR-3175 NM_001200 BMP2  | 1          |
| hsa-miR-4306 NM_001200 BMP2  | 1          |
| hsa-miR-4311 NM_001200 BMP2  | 1          |
| hsa-miR-4251 NM_001200 BMP2  | 1          |
| hsa-miR-4252 NM_001200 BMP2  | 1          |
| hsa-miR-4269 NM_001200 BMP2  | 1          |
| hsa-miR-4330 NM_001200 BMP2  | 1          |
| hsa-miR-3660 NM_001200 BMP2  | 1          |
| hsa-miR-3681 NM_001200 BMP2  | 1          |
| hsa-miR-3918 NM_001200 BMP2  | 1          |
| hsa-miR-3922 NM_001200 BMP2  | 1          |
| hsa-miR-3925 NM_001200 BMP2  | 1          |
| hsa-miR-3941 NM_001200 BMP2  | 1          |
| hsa-miR-3941 NM_001200 BMP2  | 1          |
| hsa-miR-4435 NM_001200 BMP2  | 1          |



|               |            |          |            |
|---------------|------------|----------|------------|
| hsa-miR-4463  | NM_001200  | BMP2     | 1          |
| hsa-miR-4487  | NM_001200  | BMP2     | 1          |
| hsa-miR-2392  | NM_001200  | BMP2     | 1          |
| hsa-miR-4693  | NM_001200  | BMP2     | 1          |
| hsa-miR-4711  | NM_001200  | BMP2     | 1          |
| hsa-miR-4520  | NM_001200  | BMP2     | 1          |
| hsa-miR-4723  | NM_001200  | BMP2     | 1          |
| hsa-miR-4739  | NM_001200  | BMP2     | 1          |
| hsa-miR-4755  | NM_001200  | BMP2     | 1          |
| hsa-miR-4765  | NM_001200  | BMP2     | 1          |
| hsa-miR-1245  | NM_001200  | BMP2     | 1          |
| hsa-miR-5004  | NM_001200  | BMP2     | 1          |
| hsa-miR-5010  | NM_001200  | BMP2     | 1          |
| hsa-miR-664b  | NM_001200  | BMP2     | 1          |
| hsa-miR-6085  | NM_001200  | BMP2     | 1          |
| hsa-miR-6501  | NM_001200  | BMP2     | 1          |
| hsa-miR-6512  | NM_001200  | BMP2     | 1          |
| hsa-miR-6720  | NM_001200  | BMP2     | 1          |
| hsa-miR-6774  | NM_001200  | BMP2     | 1          |
| hsa-miR-6801  | NM_001200  | BMP2     | 1          |
| hsa-miR-6806  | NM_001200  | BMP2     | 1          |
| hsa-miR-6847  | NM_001200  | BMP2     | 1          |
| hsa-miR-6873  | NM_001200  | BMP2     | 1          |
| hsa-miR-6886  | NM_001200  | BMP2     | 1          |
| hsa-miR-6894  | NM_001200  | BMP2     | 1          |
| hsa-miR-8058  | NM_001200  | BMP2     | 1          |
| hsa-miR-8060  | NM_001200  | BMP2     | 1          |
| hsa-miR-1052  | NM_001200  | BMP2     | 1          |
| hsa-miR-1118  | NM_001200  | BMP2     | 1          |
| hsa-miR-758-  | NM_031916  | ROPN1L   | 1          |
| hsa-let-7c-5p | NM_0012014 | ROPN1L   | 1          |
| hsa-miR-758-  | NM_0012014 | ROPN1L   | 1          |
| hsa-miR-6845  | NM_0012014 | ROPN1L   | 1          |
| hsa-miR-365a  | NM_032561  | C22orf23 | 0.95384615 |
| hsa-miR-4323  | NM_032561  | C22orf23 | 0.95384615 |
| hsa-miR-365a  | NM_0012070 | C22orf23 | 0.95384615 |
| hsa-miR-1022  | NM_0012070 | C22orf23 | 0.95384615 |
| hsa-miR-550a  | NM_032561  | C22orf23 | 0.95512821 |
| hsa-miR-550b  | NM_032561  | C22orf23 | 0.95512821 |
| hsa-miR-34c-  | NM_032561  | C22orf23 | 0.96153846 |
| hsa-miR-4647  | NM_032561  | C22orf23 | 0.96153846 |
| hsa-miR-5010  | NM_032561  | C22orf23 | 0.96153846 |
| hsa-miR-6824  | NM_032561  | C22orf23 | 0.96153846 |
| hsa-miR-1538  | NM_0012070 | C22orf23 | 0.96153846 |
| hsa-miR-3620  | NM_0012070 | C22orf23 | 0.96153846 |
| hsa-miR-4448  | NM_0012070 | C22orf23 | 0.96153846 |
| hsa-miR-3960  | NM_0012070 | C22orf23 | 0.96153846 |
| hsa-miR-4647  | NM_0012070 | C22orf23 | 0.96153846 |
| hsa-miR-4800  | NM_0012070 | C22orf23 | 0.96153846 |
| hsa-miR-5010  | NM_0012070 | C22orf23 | 0.96153846 |
| hsa-miR-6803  | NM_0012070 | C22orf23 | 0.96153846 |
| hsa-miR-6824  | NM_0012070 | C22orf23 | 0.96153846 |
| hsa-miR-103a  | NM_0012070 | C22orf23 | 0.97435897 |
| hsa-miR-4497  | NM_0012070 | C22orf23 | 0.97435897 |
| hsa-miR-486-  | NM_032561  | C22orf23 | 0.98076923 |
| hsa-miR-4433  | NM_032561  | C22orf23 | 0.98076923 |
| hsa-miR-1587  | NM_032561  | C22orf23 | 0.98076923 |
| hsa-miR-4665  | NM_032561  | C22orf23 | 0.98076923 |
| hsa-miR-4725  | NM_032561  | C22orf23 | 0.98076923 |
| hsa-miR-6133  | NM_032561  | C22orf23 | 0.98076923 |
| hsa-miR-7114  | NM_032561  | C22orf23 | 0.98076923 |
| hsa-miR-486-  | NM_0012070 | C22orf23 | 0.98076923 |
| hsa-miR-504-  | NM_0012070 | C22orf23 | 0.98076923 |
| hsa-miR-3137  | NM_0012070 | C22orf23 | 0.98076923 |
| hsa-miR-4433  | NM_0012070 | C22orf23 | 0.98076923 |
| hsa-miR-4507  | NM_0012070 | C22orf23 | 0.98076923 |
| hsa-miR-1587  | NM_0012070 | C22orf23 | 0.98076923 |
| hsa-miR-6133  | NM_0012070 | C22orf23 | 0.98076923 |
| hsa-miR-6741  | NM_0012070 | C22orf23 | 0.98076923 |
| hsa-miR-9718  | NM_0012070 | C22orf23 | 0.98076923 |
| hsa-miR-6860  | NM_0012070 | C22orf23 | 0.98461539 |
| hsa-miR-4667  | NM_0012070 | C22orf23 | 0.99145299 |
| hsa-miR-6826  | NM_0012070 | C22orf23 | 0.99145299 |
| hsa-let-7b-5p | NM_032561  | C22orf23 | 1          |
| hsa-let-7e-5p | NM_032561  | C22orf23 | 1          |
| hsa-miR-25-5j | NM_032561  | C22orf23 | 1          |
| hsa-miR-103a  | NM_032561  | C22orf23 | 1          |
| hsa-miR-129-  | NM_032561  | C22orf23 | 1          |
| hsa-miR-129-  | NM_032561  | C22orf23 | 1          |
| hsa-miR-204-  | NM_032561  | C22orf23 | 1          |
| hsa-miR-222-  | NM_032561  | C22orf23 | 1          |
| hsa-miR-224-  | NM_032561  | C22orf23 | 1          |
| hsa-miR-23b-  | NM_032561  | C22orf23 | 1          |
| hsa-miR-124-  | NM_032561  | C22orf23 | 1          |
| hsa-miR-125b  | NM_032561  | C22orf23 | 1          |
| hsa-miR-125b  | NM_032561  | C22orf23 | 1          |
| hsa-miR-133a  | NM_032561  | C22orf23 | 1          |
| hsa-miR-135a  | NM_032561  | C22orf23 | 1          |
| hsa-miR-149-  | NM_032561  | C22orf23 | 1          |
| hsa-miR-149-  | NM_032561  | C22orf23 | 1          |
| hsa-miR-188-  | NM_032561  | C22orf23 | 1          |
| hsa-miR-188-  | NM_032561  | C22orf23 | 1          |
| hsa-miR-200c  | NM_032561  | C22orf23 | 1          |
| hsa-miR-30c-  | NM_032561  | C22orf23 | 1          |

|              |           |          |   |
|--------------|-----------|----------|---|
| hsa-miR-302a | NM_032561 | C22orf23 | 1 |
| hsa-miR-299- | NM_032561 | C22orf23 | 1 |
| hsa-miR-296- | NM_032561 | C22orf23 | 1 |
| hsa-miR-302c | NM_032561 | C22orf23 | 1 |
| hsa-miR-370- | NM_032561 | C22orf23 | 1 |
| hsa-miR-377- | NM_032561 | C22orf23 | 1 |
| hsa-miR-323a | NM_032561 | C22orf23 | 1 |
| hsa-miR-331- | NM_032561 | C22orf23 | 1 |
| hsa-miR-339- | NM_032561 | C22orf23 | 1 |
| hsa-miR-424- | NM_032561 | C22orf23 | 1 |
| hsa-miR-431- | NM_032561 | C22orf23 | 1 |
| hsa-miR-452- | NM_032561 | C22orf23 | 1 |
| hsa-miR-483- | NM_032561 | C22orf23 | 1 |
| hsa-miR-486- | NM_032561 | C22orf23 | 1 |
| hsa-miR-497- | NM_032561 | C22orf23 | 1 |
| hsa-miR-498- | NM_032561 | C22orf23 | 1 |
| hsa-miR-498- | NM_032561 | C22orf23 | 1 |
| hsa-miR-525- | NM_032561 | C22orf23 | 1 |
| hsa-miR-525- | NM_032561 | C22orf23 | 1 |
| hsa-miR-518d | NM_032561 | C22orf23 | 1 |
| hsa-miR-505- | NM_032561 | C22orf23 | 1 |
| hsa-miR-508- | NM_032561 | C22orf23 | 1 |
| hsa-miR-509- | NM_032561 | C22orf23 | 1 |
| hsa-miR-92b- | NM_032561 | C22orf23 | 1 |
| hsa-miR-92b- | NM_032561 | C22orf23 | 1 |
| hsa-miR-561- | NM_032561 | C22orf23 | 1 |
| hsa-miR-588  | NM_032561 | C22orf23 | 1 |
| hsa-miR-550a | NM_032561 | C22orf23 | 1 |
| hsa-miR-550a | NM_032561 | C22orf23 | 1 |
| hsa-miR-597- | NM_032561 | C22orf23 | 1 |
| hsa-miR-612  | NM_032561 | C22orf23 | 1 |
| hsa-miR-614  | NM_032561 | C22orf23 | 1 |
| hsa-miR-618  | NM_032561 | C22orf23 | 1 |
| hsa-miR-627- | NM_032561 | C22orf23 | 1 |
| hsa-miR-33b- | NM_032561 | C22orf23 | 1 |
| hsa-miR-33b- | NM_032561 | C22orf23 | 1 |
| hsa-miR-639  | NM_032561 | C22orf23 | 1 |
| hsa-miR-645  | NM_032561 | C22orf23 | 1 |
| hsa-miR-648  | NM_032561 | C22orf23 | 1 |
| hsa-miR-550a | NM_032561 | C22orf23 | 1 |
| hsa-miR-1296 | NM_032561 | C22orf23 | 1 |
| hsa-miR-1271 | NM_032561 | C22orf23 | 1 |
| hsa-miR-769- | NM_032561 | C22orf23 | 1 |
| hsa-miR-769- | NM_032561 | C22orf23 | 1 |
| hsa-miR-1298 | NM_032561 | C22orf23 | 1 |
| hsa-miR-770- | NM_032561 | C22orf23 | 1 |
| hsa-miR-675- | NM_032561 | C22orf23 | 1 |
| hsa-miR-891a | NM_032561 | C22orf23 | 1 |
| hsa-miR-541- | NM_032561 | C22orf23 | 1 |
| hsa-miR-744- | NM_032561 | C22orf23 | 1 |
| hsa-miR-744- | NM_032561 | C22orf23 | 1 |
| hsa-miR-885- | NM_032561 | C22orf23 | 1 |
| hsa-miR-877- | NM_032561 | C22orf23 | 1 |
| hsa-miR-301b | NM_032561 | C22orf23 | 1 |
| hsa-miR-301b | NM_032561 | C22orf23 | 1 |
| hsa-miR-936  | NM_032561 | C22orf23 | 1 |
| hsa-miR-936  | NM_032561 | C22orf23 | 1 |
| hsa-miR-936  | NM_032561 | C22orf23 | 1 |
| hsa-miR-942- | NM_032561 | C22orf23 | 1 |
| hsa-miR-1225 | NM_032561 | C22orf23 | 1 |
| hsa-miR-1225 | NM_032561 | C22orf23 | 1 |
| hsa-miR-1226 | NM_032561 | C22orf23 | 1 |
| hsa-miR-1228 | NM_032561 | C22orf23 | 1 |
| hsa-miR-1229 | NM_032561 | C22orf23 | 1 |
| hsa-miR-1233 | NM_032561 | C22orf23 | 1 |
| hsa-miR-1236 | NM_032561 | C22orf23 | 1 |
| hsa-miR-1238 | NM_032561 | C22orf23 | 1 |
| hsa-miR-1207 | NM_032561 | C22orf23 | 1 |
| hsa-miR-1295 | NM_032561 | C22orf23 | 1 |
| hsa-miR-1244 | NM_032561 | C22orf23 | 1 |
| hsa-miR-1258 | NM_032561 | C22orf23 | 1 |
| hsa-miR-1275 | NM_032561 | C22orf23 | 1 |
| hsa-miR-1471 | NM_032561 | C22orf23 | 1 |
| hsa-miR-1538 | NM_032561 | C22orf23 | 1 |
| hsa-miR-1909 | NM_032561 | C22orf23 | 1 |
| hsa-miR-1909 | NM_032561 | C22orf23 | 1 |
| hsa-miR-1910 | NM_032561 | C22orf23 | 1 |
| hsa-miR-1910 | NM_032561 | C22orf23 | 1 |
| hsa-miR-2117 | NM_032561 | C22orf23 | 1 |
| hsa-miR-2276 | NM_032561 | C22orf23 | 1 |
| hsa-miR-711  | NM_032561 | C22orf23 | 1 |
| hsa-miR-2909 | NM_032561 | C22orf23 | 1 |
| hsa-miR-3126 | NM_032561 | C22orf23 | 1 |
| hsa-miR-3126 | NM_032561 | C22orf23 | 1 |
| hsa-miR-3137 | NM_032561 | C22orf23 | 1 |
| hsa-miR-3157 | NM_032561 | C22orf23 | 1 |
| hsa-miR-3158 | NM_032561 | C22orf23 | 1 |
| hsa-miR-1193 | NM_032561 | C22orf23 | 1 |
| hsa-miR-3177 | NM_032561 | C22orf23 | 1 |
| hsa-miR-3187 | NM_032561 | C22orf23 | 1 |
| hsa-miR-3188 | NM_032561 | C22orf23 | 1 |
| hsa-miR-3189 | NM_032561 | C22orf23 | 1 |
| hsa-miR-3189 | NM_032561 | C22orf23 | 1 |
| hsa-miR-3190 | NM_032561 | C22orf23 | 1 |

|                        |          |   |
|------------------------|----------|---|
| hsa-miR-3194 NM_032561 | C22orf23 | 1 |
| hsa-miR-3197 NM_032561 | C22orf23 | 1 |
| hsa-miR-3199 NM_032561 | C22orf23 | 1 |
| hsa-miR-4257 NM_032561 | C22orf23 | 1 |
| hsa-miR-4292 NM_032561 | C22orf23 | 1 |
| hsa-miR-500b NM_032561 | C22orf23 | 1 |
| hsa-miR-3617 NM_032561 | C22orf23 | 1 |
| hsa-miR-3621 NM_032561 | C22orf23 | 1 |
| hsa-miR-3621 NM_032561 | C22orf23 | 1 |
| hsa-miR-3622 NM_032561 | C22orf23 | 1 |
| hsa-miR-3651 NM_032561 | C22orf23 | 1 |
| hsa-miR-3662 NM_032561 | C22orf23 | 1 |
| hsa-miR-3663 NM_032561 | C22orf23 | 1 |
| hsa-miR-3666 NM_032561 | C22orf23 | 1 |
| hsa-miR-3677 NM_032561 | C22orf23 | 1 |
| hsa-miR-3682 NM_032561 | C22orf23 | 1 |
| hsa-miR-3907 NM_032561 | C22orf23 | 1 |
| hsa-miR-3936 NM_032561 | C22orf23 | 1 |
| hsa-miR-3936 NM_032561 | C22orf23 | 1 |
| hsa-miR-3937 NM_032561 | C22orf23 | 1 |
| hsa-miR-378g NM_032561 | C22orf23 | 1 |
| hsa-miR-444c NM_032561 | C22orf23 | 1 |
| hsa-miR-4443 NM_032561 | C22orf23 | 1 |
| hsa-miR-4446 NM_032561 | C22orf23 | 1 |
| hsa-miR-4447 NM_032561 | C22orf23 | 1 |
| hsa-miR-4448 NM_032561 | C22orf23 | 1 |
| hsa-miR-4450 NM_032561 | C22orf23 | 1 |
| hsa-miR-4458 NM_032561 | C22orf23 | 1 |
| hsa-miR-4465 NM_032561 | C22orf23 | 1 |
| hsa-miR-4467 NM_032561 | C22orf23 | 1 |
| hsa-miR-4469 NM_032561 | C22orf23 | 1 |
| hsa-miR-4478 NM_032561 | C22orf23 | 1 |
| hsa-miR-3155 NM_032561 | C22orf23 | 1 |
| hsa-miR-4494 NM_032561 | C22orf23 | 1 |
| hsa-miR-2392 NM_032561 | C22orf23 | 1 |
| hsa-miR-4525 NM_032561 | C22orf23 | 1 |
| hsa-miR-4529 NM_032561 | C22orf23 | 1 |
| hsa-miR-4534 NM_032561 | C22orf23 | 1 |
| hsa-miR-4633 NM_032561 | C22orf23 | 1 |
| hsa-miR-464c NM_032561 | C22orf23 | 1 |
| hsa-miR-4647 NM_032561 | C22orf23 | 1 |
| hsa-miR-4658 NM_032561 | C22orf23 | 1 |
| hsa-miR-4676 NM_032561 | C22orf23 | 1 |
| hsa-miR-1343 NM_032561 | C22orf23 | 1 |
| hsa-miR-4691 NM_032561 | C22orf23 | 1 |
| hsa-miR-4693 NM_032561 | C22orf23 | 1 |
| hsa-miR-4694 NM_032561 | C22orf23 | 1 |
| hsa-miR-4701 NM_032561 | C22orf23 | 1 |
| hsa-miR-4701 NM_032561 | C22orf23 | 1 |
| hsa-miR-4708 NM_032561 | C22orf23 | 1 |
| hsa-miR-4723 NM_032561 | C22orf23 | 1 |
| hsa-miR-4727 NM_032561 | C22orf23 | 1 |
| hsa-miR-4733 NM_032561 | C22orf23 | 1 |
| hsa-miR-4734 NM_032561 | C22orf23 | 1 |
| hsa-miR-3064 NM_032561 | C22orf23 | 1 |
| hsa-miR-4745 NM_032561 | C22orf23 | 1 |
| hsa-miR-4747 NM_032561 | C22orf23 | 1 |
| hsa-miR-4749 NM_032561 | C22orf23 | 1 |
| hsa-miR-4751 NM_032561 | C22orf23 | 1 |
| hsa-miR-4757 NM_032561 | C22orf23 | 1 |
| hsa-miR-4758 NM_032561 | C22orf23 | 1 |
| hsa-miR-4769 NM_032561 | C22orf23 | 1 |
| hsa-miR-4436 NM_032561 | C22orf23 | 1 |
| hsa-miR-4783 NM_032561 | C22orf23 | 1 |
| hsa-miR-2467 NM_032561 | C22orf23 | 1 |
| hsa-miR-4999 NM_032561 | C22orf23 | 1 |
| hsa-miR-5087 NM_032561 | C22orf23 | 1 |
| hsa-miR-5189 NM_032561 | C22orf23 | 1 |
| hsa-miR-519c NM_032561 | C22orf23 | 1 |
| hsa-miR-5194 NM_032561 | C22orf23 | 1 |
| hsa-miR-5196 NM_032561 | C22orf23 | 1 |
| hsa-miR-558c NM_032561 | C22orf23 | 1 |
| hsa-miR-5585 NM_032561 | C22orf23 | 1 |
| hsa-miR-1295 NM_032561 | C22orf23 | 1 |
| hsa-miR-5588 NM_032561 | C22orf23 | 1 |
| hsa-miR-5589 NM_032561 | C22orf23 | 1 |
| hsa-miR-5591 NM_032561 | C22orf23 | 1 |
| hsa-miR-5682 NM_032561 | C22orf23 | 1 |
| hsa-miR-5685 NM_032561 | C22orf23 | 1 |
| hsa-miR-5698 NM_032561 | C22orf23 | 1 |
| hsa-miR-6069 NM_032561 | C22orf23 | 1 |
| hsa-miR-6078 NM_032561 | C22orf23 | 1 |
| hsa-miR-6084 NM_032561 | C22orf23 | 1 |
| hsa-miR-6129 NM_032561 | C22orf23 | 1 |
| hsa-miR-6130 NM_032561 | C22orf23 | 1 |
| hsa-miR-6134 NM_032561 | C22orf23 | 1 |
| hsa-miR-6134 NM_032561 | C22orf23 | 1 |
| hsa-miR-6499 NM_032561 | C22orf23 | 1 |
| hsa-miR-650c NM_032561 | C22orf23 | 1 |
| hsa-miR-6501 NM_032561 | C22orf23 | 1 |
| hsa-miR-6508 NM_032561 | C22orf23 | 1 |
| hsa-miR-651c NM_032561 | C22orf23 | 1 |
| hsa-miR-6514 NM_032561 | C22orf23 | 1 |
| hsa-miR-6515 NM_032561 | C22orf23 | 1 |



|                                  |   |
|----------------------------------|---|
| hsa-miR-92a- NM_0012070 C22orf23 | 1 |
| hsa-miR-199a NM_0012070 C22orf23 | 1 |
| hsa-miR-129- NM_0012070 C22orf23 | 1 |
| hsa-miR-199b NM_0012070 C22orf23 | 1 |
| hsa-miR-204- NM_0012070 C22orf23 | 1 |
| hsa-miR-210- NM_0012070 C22orf23 | 1 |
| hsa-miR-210- NM_0012070 C22orf23 | 1 |
| hsa-miR-214- NM_0012070 C22orf23 | 1 |
| hsa-miR-216a NM_0012070 C22orf23 | 1 |
| hsa-miR-224- NM_0012070 C22orf23 | 1 |
| hsa-miR-23b- NM_0012070 C22orf23 | 1 |
| hsa-miR-125b NM_0012070 C22orf23 | 1 |
| hsa-miR-135a NM_0012070 C22orf23 | 1 |
| hsa-miR-135a NM_0012070 C22orf23 | 1 |
| hsa-miR-125a NM_0012070 C22orf23 | 1 |
| hsa-miR-127- NM_0012070 C22orf23 | 1 |
| hsa-miR-149- NM_0012070 C22orf23 | 1 |
| hsa-miR-149- NM_0012070 C22orf23 | 1 |
| hsa-miR-154- NM_0012070 C22orf23 | 1 |
| hsa-miR-188- NM_0012070 C22orf23 | 1 |
| hsa-miR-188- NM_0012070 C22orf23 | 1 |
| hsa-miR-200c NM_0012070 C22orf23 | 1 |
| hsa-miR-30c- NM_0012070 C22orf23 | 1 |
| hsa-miR-299- NM_0012070 C22orf23 | 1 |
| hsa-miR-296- NM_0012070 C22orf23 | 1 |
| hsa-miR-361- NM_0012070 C22orf23 | 1 |
| hsa-miR-365b NM_0012070 C22orf23 | 1 |
| hsa-miR-302d NM_0012070 C22orf23 | 1 |
| hsa-miR-370- NM_0012070 C22orf23 | 1 |
| hsa-miR-377- NM_0012070 C22orf23 | 1 |
| hsa-miR-383- NM_0012070 C22orf23 | 1 |
| hsa-miR-324- NM_0012070 C22orf23 | 1 |
| hsa-miR-339- NM_0012070 C22orf23 | 1 |
| hsa-miR-325 NM_0012070 C22orf23  | 1 |
| hsa-miR-424- NM_0012070 C22orf23 | 1 |
| hsa-miR-448 NM_0012070 C22orf23  | 1 |
| hsa-miR-452- NM_0012070 C22orf23 | 1 |
| hsa-miR-452- NM_0012070 C22orf23 | 1 |
| hsa-miR-483- NM_0012070 C22orf23 | 1 |
| hsa-miR-490- NM_0012070 C22orf23 | 1 |
| hsa-miR-146b NM_0012070 C22orf23 | 1 |
| hsa-miR-497- NM_0012070 C22orf23 | 1 |
| hsa-miR-512- NM_0012070 C22orf23 | 1 |
| hsa-miR-498- NM_0012070 C22orf23 | 1 |
| hsa-miR-525- NM_0012070 C22orf23 | 1 |
| hsa-miR-520g NM_0012070 C22orf23 | 1 |
| hsa-miR-505- NM_0012070 C22orf23 | 1 |
| hsa-miR-509- NM_0012070 C22orf23 | 1 |
| hsa-miR-455- NM_0012070 C22orf23 | 1 |
| hsa-miR-555 NM_0012070 C22orf23  | 1 |
| hsa-miR-557 NM_0012070 C22orf23  | 1 |
| hsa-miR-571 NM_0012070 C22orf23  | 1 |
| hsa-miR-579- NM_0012070 C22orf23 | 1 |
| hsa-miR-588 NM_0012070 C22orf23  | 1 |
| hsa-miR-550a NM_0012070 C22orf23 | 1 |
| hsa-miR-550a NM_0012070 C22orf23 | 1 |
| hsa-miR-596 NM_0012070 C22orf23  | 1 |
| hsa-miR-604 NM_0012070 C22orf23  | 1 |
| hsa-miR-612 NM_0012070 C22orf23  | 1 |
| hsa-miR-615- NM_0012070 C22orf23 | 1 |
| hsa-miR-627- NM_0012070 C22orf23 | 1 |
| hsa-miR-33b- NM_0012070 C22orf23 | 1 |
| hsa-miR-33b- NM_0012070 C22orf23 | 1 |
| hsa-miR-638 NM_0012070 C22orf23  | 1 |
| hsa-miR-638 NM_0012070 C22orf23  | 1 |
| hsa-miR-639 NM_0012070 C22orf23  | 1 |
| hsa-miR-648 NM_0012070 C22orf23  | 1 |
| hsa-miR-650 NM_0012070 C22orf23  | 1 |
| hsa-miR-663a NM_0012070 C22orf23 | 1 |
| hsa-miR-550a NM_0012070 C22orf23 | 1 |
| hsa-miR-550a NM_0012070 C22orf23 | 1 |
| hsa-miR-769- NM_0012070 C22orf23 | 1 |
| hsa-miR-769- NM_0012070 C22orf23 | 1 |
| hsa-miR-1298 NM_0012070 C22orf23 | 1 |
| hsa-miR-765 NM_0012070 C22orf23  | 1 |
| hsa-miR-770- NM_0012070 C22orf23 | 1 |
| hsa-miR-675- NM_0012070 C22orf23 | 1 |
| hsa-miR-298 NM_0012070 C22orf23  | 1 |
| hsa-miR-744- NM_0012070 C22orf23 | 1 |
| hsa-miR-744- NM_0012070 C22orf23 | 1 |
| hsa-miR-885- NM_0012070 C22orf23 | 1 |
| hsa-miR-877- NM_0012070 C22orf23 | 1 |
| hsa-miR-873- NM_0012070 C22orf23 | 1 |
| hsa-miR-301b NM_0012070 C22orf23 | 1 |
| hsa-miR-301b NM_0012070 C22orf23 | 1 |
| hsa-miR-942- NM_0012070 C22orf23 | 1 |
| hsa-miR-1182 NM_0012070 C22orf23 | 1 |
| hsa-miR-1184 NM_0012070 C22orf23 | 1 |
| hsa-miR-1226 NM_0012070 C22orf23 | 1 |
| hsa-miR-1227 NM_0012070 C22orf23 | 1 |
| hsa-miR-1228 NM_0012070 C22orf23 | 1 |
| hsa-miR-1228 NM_0012070 C22orf23 | 1 |
| hsa-miR-1231 NM_0012070 C22orf23 | 1 |
| hsa-miR-1233 NM_0012070 C22orf23 | 1 |





|                                  |            |
|----------------------------------|------------|
| hsa-miR-681C NM_0012070 C22orf23 | 1          |
| hsa-miR-6811 NM_0012070 C22orf23 | 1          |
| hsa-miR-6812 NM_0012070 C22orf23 | 1          |
| hsa-miR-6817 NM_0012070 C22orf23 | 1          |
| hsa-miR-6819 NM_0012070 C22orf23 | 1          |
| hsa-miR-682C NM_0012070 C22orf23 | 1          |
| hsa-miR-6821 NM_0012070 C22orf23 | 1          |
| hsa-miR-6823 NM_0012070 C22orf23 | 1          |
| hsa-miR-6823 NM_0012070 C22orf23 | 1          |
| hsa-miR-6827 NM_0012070 C22orf23 | 1          |
| hsa-miR-6828 NM_0012070 C22orf23 | 1          |
| hsa-miR-6829 NM_0012070 C22orf23 | 1          |
| hsa-miR-6831 NM_0012070 C22orf23 | 1          |
| hsa-miR-6834 NM_0012070 C22orf23 | 1          |
| hsa-miR-6842 NM_0012070 C22orf23 | 1          |
| hsa-miR-6845 NM_0012070 C22orf23 | 1          |
| hsa-miR-6847 NM_0012070 C22orf23 | 1          |
| hsa-miR-6848 NM_0012070 C22orf23 | 1          |
| hsa-miR-6849 NM_0012070 C22orf23 | 1          |
| hsa-miR-6853 NM_0012070 C22orf23 | 1          |
| hsa-miR-6855 NM_0012070 C22orf23 | 1          |
| hsa-miR-6857 NM_0012070 C22orf23 | 1          |
| hsa-miR-6861 NM_0012070 C22orf23 | 1          |
| hsa-miR-6863 NM_0012070 C22orf23 | 1          |
| hsa-miR-6864 NM_0012070 C22orf23 | 1          |
| hsa-miR-6867 NM_0012070 C22orf23 | 1          |
| hsa-miR-6867 NM_0012070 C22orf23 | 1          |
| hsa-miR-6869 NM_0012070 C22orf23 | 1          |
| hsa-miR-687C NM_0012070 C22orf23 | 1          |
| hsa-miR-687C NM_0012070 C22orf23 | 1          |
| hsa-miR-6873 NM_0012070 C22orf23 | 1          |
| hsa-miR-6875 NM_0012070 C22orf23 | 1          |
| hsa-miR-6876 NM_0012070 C22orf23 | 1          |
| hsa-miR-6877 NM_0012070 C22orf23 | 1          |
| hsa-miR-6879 NM_0012070 C22orf23 | 1          |
| hsa-miR-688C NM_0012070 C22orf23 | 1          |
| hsa-miR-6882 NM_0012070 C22orf23 | 1          |
| hsa-miR-6883 NM_0012070 C22orf23 | 1          |
| hsa-miR-6886 NM_0012070 C22orf23 | 1          |
| hsa-miR-6886 NM_0012070 C22orf23 | 1          |
| hsa-miR-6888 NM_0012070 C22orf23 | 1          |
| hsa-miR-6888 NM_0012070 C22orf23 | 1          |
| hsa-miR-6891 NM_0012070 C22orf23 | 1          |
| hsa-miR-6892 NM_0012070 C22orf23 | 1          |
| hsa-miR-7108 NM_0012070 C22orf23 | 1          |
| hsa-miR-711C NM_0012070 C22orf23 | 1          |
| hsa-miR-711C NM_0012070 C22orf23 | 1          |
| hsa-miR-7114 NM_0012070 C22orf23 | 1          |
| hsa-miR-7114 NM_0012070 C22orf23 | 1          |
| hsa-miR-715C NM_0012070 C22orf23 | 1          |
| hsa-miR-7152 NM_0012070 C22orf23 | 1          |
| hsa-miR-7155 NM_0012070 C22orf23 | 1          |
| hsa-miR-7157 NM_0012070 C22orf23 | 1          |
| hsa-miR-7706 NM_0012070 C22orf23 | 1          |
| hsa-miR-7843 NM_0012070 C22orf23 | 1          |
| hsa-miR-1273 NM_0012070 C22orf23 | 1          |
| hsa-miR-1273 NM_0012070 C22orf23 | 1          |
| hsa-miR-1273 NM_0012070 C22orf23 | 1          |
| hsa-miR-7976 NM_0012070 C22orf23 | 1          |
| hsa-miR-8071 NM_0012070 C22orf23 | 1          |
| hsa-miR-8072 NM_0012070 C22orf23 | 1          |
| hsa-miR-8073 NM_0012070 C22orf23 | 1          |
| hsa-miR-8078 NM_0012070 C22orf23 | 1          |
| hsa-miR-808C NM_0012070 C22orf23 | 1          |
| hsa-miR-8082 NM_0012070 C22orf23 | 1          |
| hsa-miR-9901 NM_0012070 C22orf23 | 1          |
| hsa-miR-9985 NM_0012070 C22orf23 | 1          |
| hsa-miR-1039 NM_0012070 C22orf23 | 1          |
| hsa-miR-1039 NM_0012070 C22orf23 | 1          |
| hsa-miR-104C NM_0012070 C22orf23 | 1          |
| hsa-miR-104C NM_0012070 C22orf23 | 1          |
| hsa-miR-104C NM_0012070 C22orf23 | 1          |
| hsa-miR-1118 NM_0012070 C22orf23 | 1          |
| hsa-miR-1139 NM_0012070 C22orf23 | 1          |
| hsa-miR-3059 NM_0012070 C22orf23 | 1          |
| hsa-miR-9851 NM_0012070 C22orf23 | 1          |
| hsa-miR-1211 NM_0012070 C22orf23 | 1          |
| hsa-miR-1211 NM_0012070 C22orf23 | 1          |
| hsa-miR-1212 NM_0012070 C22orf23 | 1          |
| hsa-miR-1212 NM_0012070 C22orf23 | 1          |
| hsa-miR-1212 NM_0012070 C22orf23 | 1          |
| hsa-miR-4441 NM_001211 BUB1B     | 0.96153846 |
| hsa-miR-4648 NM_001211 BUB1B     | 0.96153846 |
| hsa-let-7b-5p NM_001211 BUB1B    | 1          |
| hsa-let-7c-5p NM_001211 BUB1B    | 1          |
| hsa-miR-182-1 NM_001211 BUB1B    | 1          |
| hsa-miR-211-1 NM_001211 BUB1B    | 1          |
| hsa-miR-365a NM_001211 BUB1B     | 1          |
| hsa-miR-381-1 NM_001211 BUB1B    | 1          |
| hsa-miR-483-1 NM_001211 BUB1B    | 1          |
| hsa-miR-33b-1 NM_001211 BUB1B    | 1          |
| hsa-miR-650 NM_001211 BUB1B      | 1          |
| hsa-miR-454-1 NM_001211 BUB1B    | 1          |



|                          |       |            |
|--------------------------|-------|------------|
| hsa-miR-1236 NM_001211   | BUB1B | 1          |
| hsa-miR-1293 NM_001211   | BUB1B | 1          |
| hsa-miR-1261 NM_001211   | BUB1B | 1          |
| hsa-miR-2278 NM_001211   | BUB1B | 1          |
| hsa-miR-3120 NM_001211   | BUB1B | 1          |
| hsa-miR-3153 NM_001211   | BUB1B | 1          |
| hsa-miR-4295 NM_001211   | BUB1B | 1          |
| hsa-miR-4728 NM_001211   | BUB1B | 1          |
| hsa-miR-4738 NM_001211   | BUB1B | 1          |
| hsa-miR-5003 NM_001211   | BUB1B | 1          |
| hsa-miR-5187 NM_001211   | BUB1B | 1          |
| hsa-miR-5196 NM_001211   | BUB1B | 1          |
| hsa-miR-6731 NM_001211   | BUB1B | 1          |
| hsa-miR-6777 NM_001211   | BUB1B | 1          |
| hsa-miR-6801 NM_001211   | BUB1B | 1          |
| hsa-miR-6808 NM_001211   | BUB1B | 1          |
| hsa-miR-6780 NM_001211   | BUB1B | 1          |
| hsa-miR-6856 NM_001211   | BUB1B | 1          |
| hsa-miR-7849 NM_001211   | BUB1B | 1          |
| hsa-miR-509C NM_0012538  | SPAG6 | 0.96153846 |
| hsa-miR-921 NM_172242    | SPAG6 | 0.96153846 |
| hsa-miR-451a NM_0012538  | SPAG6 | 0.97435897 |
| hsa-miR-4253 NM_0012538  | SPAG6 | 0.97435897 |
| hsa-miR-451a NM_172242   | SPAG6 | 0.97435897 |
| hsa-miR-451a NM_012443   | SPAG6 | 0.97435897 |
| hsa-miR-616- NM_0012538  | SPAG6 | 0.98076923 |
| hsa-miR-6133 NM_0012538  | SPAG6 | 0.98076923 |
| hsa-miR-6828 NM_0012538  | SPAG6 | 0.98076923 |
| hsa-miR-616- NM_172242   | SPAG6 | 0.98076923 |
| hsa-miR-616- NM_012443   | SPAG6 | 0.98076923 |
| hsa-miR-197- NM_0012538  | SPAG6 | 1          |
| hsa-miR-210- NM_0012538  | SPAG6 | 1          |
| hsa-let-7g-3p NM_0012538 | SPAG6 | 1          |
| hsa-miR-125a NM_0012538  | SPAG6 | 1          |
| hsa-miR-185- NM_0012538  | SPAG6 | 1          |
| hsa-miR-330- NM_0012538  | SPAG6 | 1          |
| hsa-miR-326 NM_0012538   | SPAG6 | 1          |
| hsa-miR-450a NM_0012538  | SPAG6 | 1          |
| hsa-miR-412- NM_0012538  | SPAG6 | 1          |
| hsa-miR-376b NM_0012538  | SPAG6 | 1          |
| hsa-miR-520g NM_0012538  | SPAG6 | 1          |
| hsa-miR-520h NM_0012538  | SPAG6 | 1          |
| hsa-miR-574- NM_0012538  | SPAG6 | 1          |
| hsa-miR-574- NM_0012538  | SPAG6 | 1          |
| hsa-miR-608 NM_0012538   | SPAG6 | 1          |
| hsa-miR-610 NM_0012538   | SPAG6 | 1          |
| hsa-miR-320c NM_0012538  | SPAG6 | 1          |
| hsa-miR-1185 NM_0012538  | SPAG6 | 1          |
| hsa-miR-874- NM_0012538  | SPAG6 | 1          |
| hsa-miR-744- NM_0012538  | SPAG6 | 1          |
| hsa-miR-887- NM_0012538  | SPAG6 | 1          |
| hsa-miR-760 NM_0012538   | SPAG6 | 1          |
| hsa-miR-301b NM_0012538  | SPAG6 | 1          |
| hsa-miR-297 NM_0012538   | SPAG6 | 1          |
| hsa-miR-1270 NM_0012538  | SPAG6 | 1          |
| hsa-miR-1288 NM_0012538  | SPAG6 | 1          |
| hsa-miR-1255 NM_0012538  | SPAG6 | 1          |
| hsa-miR-513c NM_0012538  | SPAG6 | 1          |
| hsa-miR-147C NM_0012538  | SPAG6 | 1          |
| hsa-miR-3122 NM_0012538  | SPAG6 | 1          |
| hsa-miR-3149 NM_0012538  | SPAG6 | 1          |
| hsa-miR-316C NM_0012538  | SPAG6 | 1          |
| hsa-miR-3162 NM_0012538  | SPAG6 | 1          |
| hsa-miR-3166 NM_0012538  | SPAG6 | 1          |
| hsa-miR-3185 NM_0012538  | SPAG6 | 1          |
| hsa-miR-514b NM_0012538  | SPAG6 | 1          |
| hsa-miR-4295 NM_0012538  | SPAG6 | 1          |
| hsa-miR-4316 NM_0012538  | SPAG6 | 1          |
| hsa-miR-4256 NM_0012538  | SPAG6 | 1          |
| hsa-miR-4253 NM_0012538  | SPAG6 | 1          |
| hsa-miR-4280 NM_0012538  | SPAG6 | 1          |
| hsa-miR-362C NM_0012538  | SPAG6 | 1          |
| hsa-miR-4425 NM_0012538  | SPAG6 | 1          |
| hsa-miR-4485 NM_0012538  | SPAG6 | 1          |
| hsa-miR-4508 NM_0012538  | SPAG6 | 1          |
| hsa-miR-4640 NM_0012538  | SPAG6 | 1          |
| hsa-miR-4655 NM_0012538  | SPAG6 | 1          |
| hsa-miR-4690 NM_0012538  | SPAG6 | 1          |
| hsa-miR-4704 NM_0012538  | SPAG6 | 1          |
| hsa-miR-4723 NM_0012538  | SPAG6 | 1          |
| hsa-miR-4731 NM_0012538  | SPAG6 | 1          |
| hsa-miR-4732 NM_0012538  | SPAG6 | 1          |
| hsa-miR-4747 NM_0012538  | SPAG6 | 1          |
| hsa-miR-4755 NM_0012538  | SPAG6 | 1          |
| hsa-miR-4761 NM_0012538  | SPAG6 | 1          |
| hsa-miR-4781 NM_0012538  | SPAG6 | 1          |
| hsa-miR-5196 NM_0012538  | SPAG6 | 1          |
| hsa-miR-5735 NM_0012538  | SPAG6 | 1          |
| hsa-miR-6513 NM_0012538  | SPAG6 | 1          |
| hsa-miR-6515 NM_0012538  | SPAG6 | 1          |
| hsa-miR-6715 NM_0012538  | SPAG6 | 1          |
| hsa-miR-6724 NM_0012538  | SPAG6 | 1          |
| hsa-miR-6738 NM_0012538  | SPAG6 | 1          |
| hsa-miR-6740 NM_0012538  | SPAG6 | 1          |

|                                |   |
|--------------------------------|---|
| hsa-miR-6749 NM_0012538 SPAG6  | 1 |
| hsa-miR-6749 NM_0012538 SPAG6  | 1 |
| hsa-miR-6753 NM_0012538 SPAG6  | 1 |
| hsa-miR-6754 NM_0012538 SPAG6  | 1 |
| hsa-miR-6758 NM_0012538 SPAG6  | 1 |
| hsa-miR-6760 NM_0012538 SPAG6  | 1 |
| hsa-miR-6771 NM_0012538 SPAG6  | 1 |
| hsa-miR-6773 NM_0012538 SPAG6  | 1 |
| hsa-miR-6810 NM_0012538 SPAG6  | 1 |
| hsa-miR-6827 NM_0012538 SPAG6  | 1 |
| hsa-miR-6828 NM_0012538 SPAG6  | 1 |
| hsa-miR-6837 NM_0012538 SPAG6  | 1 |
| hsa-miR-6845 NM_0012538 SPAG6  | 1 |
| hsa-miR-6853 NM_0012538 SPAG6  | 1 |
| hsa-miR-6862 NM_0012538 SPAG6  | 1 |
| hsa-miR-6865 NM_0012538 SPAG6  | 1 |
| hsa-miR-6867 NM_0012538 SPAG6  | 1 |
| hsa-miR-6875 NM_0012538 SPAG6  | 1 |
| hsa-miR-6884 NM_0012538 SPAG6  | 1 |
| hsa-miR-6890 NM_0012538 SPAG6  | 1 |
| hsa-miR-6891 NM_0012538 SPAG6  | 1 |
| hsa-miR-7110 NM_0012538 SPAG6  | 1 |
| hsa-miR-7845 NM_0012538 SPAG6  | 1 |
| hsa-miR-7846 NM_0012538 SPAG6  | 1 |
| hsa-miR-9986 NM_0012538 SPAG6  | 1 |
| hsa-miR-1022 NM_0012538 SPAG6  | 1 |
| hsa-miR-30c-1 NM_0012538 SPAG6 | 1 |
| hsa-miR-10a-1 NM_0012538 SPAG6 | 1 |
| hsa-miR-203a NM_0012538 SPAG6  | 1 |
| hsa-miR-210-1 NM_0012538 SPAG6 | 1 |
| hsa-miR-30b-1 NM_0012538 SPAG6 | 1 |
| hsa-miR-140-1 NM_0012538 SPAG6 | 1 |
| hsa-miR-125a NM_0012538 SPAG6  | 1 |
| hsa-miR-185-1 NM_0012538 SPAG6 | 1 |
| hsa-miR-30c-1 NM_0012538 SPAG6 | 1 |
| hsa-miR-219a NM_0012538 SPAG6  | 1 |
| hsa-miR-330-1 NM_0012538 SPAG6 | 1 |
| hsa-miR-452-1 NM_0012538 SPAG6 | 1 |
| hsa-miR-181d NM_0012538 SPAG6  | 1 |
| hsa-miR-519e NM_0012538 SPAG6  | 1 |
| hsa-miR-518a NM_0012538 SPAG6  | 1 |
| hsa-miR-500a NM_0012538 SPAG6  | 1 |
| hsa-miR-595 NM_0012538 SPAG6   | 1 |
| hsa-miR-608 NM_0012538 SPAG6   | 1 |
| hsa-miR-1185 NM_0012538 SPAG6  | 1 |
| hsa-miR-874-1 NM_0012538 SPAG6 | 1 |
| hsa-miR-541-1 NM_0012538 SPAG6 | 1 |
| hsa-miR-887-1 NM_0012538 SPAG6 | 1 |
| hsa-miR-760 NM_0012538 SPAG6   | 1 |
| hsa-miR-934 NM_0012538 SPAG6   | 1 |
| hsa-miR-297 NM_0012538 SPAG6   | 1 |
| hsa-miR-1182 NM_0012538 SPAG6  | 1 |
| hsa-miR-1236 NM_0012538 SPAG6  | 1 |
| hsa-miR-1294 NM_0012538 SPAG6  | 1 |
| hsa-miR-1288 NM_0012538 SPAG6  | 1 |
| hsa-miR-513c NM_0012538 SPAG6  | 1 |
| hsa-miR-3120 NM_0012538 SPAG6  | 1 |
| hsa-miR-3122 NM_0012538 SPAG6  | 1 |
| hsa-miR-3127 NM_0012538 SPAG6  | 1 |
| hsa-miR-3149 NM_0012538 SPAG6  | 1 |
| hsa-miR-3160 NM_0012538 SPAG6  | 1 |
| hsa-miR-3173 NM_0012538 SPAG6  | 1 |
| hsa-miR-3189 NM_0012538 SPAG6  | 1 |
| hsa-miR-514b NM_0012538 SPAG6  | 1 |
| hsa-miR-4295 NM_0012538 SPAG6  | 1 |
| hsa-miR-4316 NM_0012538 SPAG6  | 1 |
| hsa-miR-4256 NM_0012538 SPAG6  | 1 |
| hsa-miR-4259 NM_0012538 SPAG6  | 1 |
| hsa-miR-4253 NM_0012538 SPAG6  | 1 |
| hsa-miR-3670 NM_0012538 SPAG6  | 1 |
| hsa-miR-3689 NM_0012538 SPAG6  | 1 |
| hsa-miR-3692 NM_0012538 SPAG6  | 1 |
| hsa-miR-3922 NM_0012538 SPAG6  | 1 |
| hsa-miR-4429 NM_0012538 SPAG6  | 1 |
| hsa-miR-4430 NM_0012538 SPAG6  | 1 |
| hsa-miR-4437 NM_0012538 SPAG6  | 1 |
| hsa-miR-4450 NM_0012538 SPAG6  | 1 |
| hsa-miR-4505 NM_0012538 SPAG6  | 1 |
| hsa-miR-4508 NM_0012538 SPAG6  | 1 |
| hsa-miR-4640 NM_0012538 SPAG6  | 1 |
| hsa-miR-4655 NM_0012538 SPAG6  | 1 |
| hsa-miR-4661 NM_0012538 SPAG6  | 1 |
| hsa-miR-4690 NM_0012538 SPAG6  | 1 |
| hsa-miR-4693 NM_0012538 SPAG6  | 1 |
| hsa-miR-4701 NM_0012538 SPAG6  | 1 |
| hsa-miR-4704 NM_0012538 SPAG6  | 1 |
| hsa-miR-4709 NM_0012538 SPAG6  | 1 |
| hsa-miR-4753 NM_0012538 SPAG6  | 1 |
| hsa-miR-4755 NM_0012538 SPAG6  | 1 |
| hsa-miR-4761 NM_0012538 SPAG6  | 1 |
| hsa-miR-4769 NM_0012538 SPAG6  | 1 |
| hsa-miR-4778 NM_0012538 SPAG6  | 1 |
| hsa-miR-5584 NM_0012538 SPAG6  | 1 |
| hsa-miR-5684 NM_0012538 SPAG6  | 1 |

|                               |   |
|-------------------------------|---|
| hsa-miR-5695 NM_0012538 SPAG6 | 1 |
| hsa-miR-6132 NM_0012538 SPAG6 | 1 |
| hsa-miR-6133 NM_0012538 SPAG6 | 1 |
| hsa-miR-6165 NM_0012538 SPAG6 | 1 |
| hsa-miR-6513 NM_0012538 SPAG6 | 1 |
| hsa-miR-6515 NM_0012538 SPAG6 | 1 |
| hsa-miR-6733 NM_0012538 SPAG6 | 1 |
| hsa-miR-6738 NM_0012538 SPAG6 | 1 |
| hsa-miR-6753 NM_0012538 SPAG6 | 1 |
| hsa-miR-6754 NM_0012538 SPAG6 | 1 |
| hsa-miR-6771 NM_0012538 SPAG6 | 1 |
| hsa-miR-6773 NM_0012538 SPAG6 | 1 |
| hsa-miR-6777 NM_0012538 SPAG6 | 1 |
| hsa-miR-6778 NM_0012538 SPAG6 | 1 |
| hsa-miR-6785 NM_0012538 SPAG6 | 1 |
| hsa-miR-6787 NM_0012538 SPAG6 | 1 |
| hsa-miR-6810 NM_0012538 SPAG6 | 1 |
| hsa-miR-6815 NM_0012538 SPAG6 | 1 |
| hsa-miR-6822 NM_0012538 SPAG6 | 1 |
| hsa-miR-6827 NM_0012538 SPAG6 | 1 |
| hsa-miR-6831 NM_0012538 SPAG6 | 1 |
| hsa-miR-6833 NM_0012538 SPAG6 | 1 |
| hsa-miR-6845 NM_0012538 SPAG6 | 1 |
| hsa-miR-6846 NM_0012538 SPAG6 | 1 |
| hsa-miR-6853 NM_0012538 SPAG6 | 1 |
| hsa-miR-6860 NM_0012538 SPAG6 | 1 |
| hsa-miR-6865 NM_0012538 SPAG6 | 1 |
| hsa-miR-6867 NM_0012538 SPAG6 | 1 |
| hsa-miR-6875 NM_0012538 SPAG6 | 1 |
| hsa-miR-7110 NM_0012538 SPAG6 | 1 |
| hsa-miR-7845 NM_0012538 SPAG6 | 1 |
| hsa-miR-9986 NM_0012538 SPAG6 | 1 |
| hsa-miR-1022 NM_0012538 SPAG6 | 1 |
| hsa-miR-197- NM_172242 SPAG6  | 1 |
| hsa-miR-210- NM_172242 SPAG6  | 1 |
| hsa-miR-125a NM_172242 SPAG6  | 1 |
| hsa-miR-185- NM_172242 SPAG6  | 1 |
| hsa-miR-330- NM_172242 SPAG6  | 1 |
| hsa-miR-326 NM_172242 SPAG6   | 1 |
| hsa-miR-423- NM_172242 SPAG6  | 1 |
| hsa-miR-450a NM_172242 SPAG6  | 1 |
| hsa-miR-412- NM_172242 SPAG6  | 1 |
| hsa-miR-376b NM_172242 SPAG6  | 1 |
| hsa-miR-520g NM_172242 SPAG6  | 1 |
| hsa-miR-520h NM_172242 SPAG6  | 1 |
| hsa-miR-500a NM_172242 SPAG6  | 1 |
| hsa-miR-574- NM_172242 SPAG6  | 1 |
| hsa-miR-574- NM_172242 SPAG6  | 1 |
| hsa-miR-608 NM_172242 SPAG6   | 1 |
| hsa-miR-610 NM_172242 SPAG6   | 1 |
| hsa-miR-320c NM_172242 SPAG6  | 1 |
| hsa-miR-1185 NM_172242 SPAG6  | 1 |
| hsa-miR-874- NM_172242 SPAG6  | 1 |
| hsa-miR-744- NM_172242 SPAG6  | 1 |
| hsa-miR-887- NM_172242 SPAG6  | 1 |
| hsa-miR-760 NM_172242 SPAG6   | 1 |
| hsa-miR-301b NM_172242 SPAG6  | 1 |
| hsa-miR-297 NM_172242 SPAG6   | 1 |
| hsa-miR-1207 NM_172242 SPAG6  | 1 |
| hsa-miR-1270 NM_172242 SPAG6  | 1 |
| hsa-miR-1288 NM_172242 SPAG6  | 1 |
| hsa-miR-1255 NM_172242 SPAG6  | 1 |
| hsa-miR-513c NM_172242 SPAG6  | 1 |
| hsa-miR-1470 NM_172242 SPAG6  | 1 |
| hsa-miR-3122 NM_172242 SPAG6  | 1 |
| hsa-miR-3145 NM_172242 SPAG6  | 1 |
| hsa-miR-3160 NM_172242 SPAG6  | 1 |
| hsa-miR-3162 NM_172242 SPAG6  | 1 |
| hsa-miR-3166 NM_172242 SPAG6  | 1 |
| hsa-miR-3185 NM_172242 SPAG6  | 1 |
| hsa-miR-514b NM_172242 SPAG6  | 1 |
| hsa-miR-4295 NM_172242 SPAG6  | 1 |
| hsa-miR-4316 NM_172242 SPAG6  | 1 |
| hsa-miR-4256 NM_172242 SPAG6  | 1 |
| hsa-miR-4253 NM_172242 SPAG6  | 1 |
| hsa-miR-4280 NM_172242 SPAG6  | 1 |
| hsa-miR-3620 NM_172242 SPAG6  | 1 |
| hsa-miR-3922 NM_172242 SPAG6  | 1 |
| hsa-miR-4425 NM_172242 SPAG6  | 1 |
| hsa-miR-4451 NM_172242 SPAG6  | 1 |
| hsa-miR-4485 NM_172242 SPAG6  | 1 |
| hsa-miR-4508 NM_172242 SPAG6  | 1 |
| hsa-miR-4632 NM_172242 SPAG6  | 1 |
| hsa-miR-4640 NM_172242 SPAG6  | 1 |
| hsa-miR-4655 NM_172242 SPAG6  | 1 |
| hsa-miR-4667 NM_172242 SPAG6  | 1 |
| hsa-miR-4690 NM_172242 SPAG6  | 1 |
| hsa-miR-4704 NM_172242 SPAG6  | 1 |
| hsa-miR-4723 NM_172242 SPAG6  | 1 |
| hsa-miR-4731 NM_172242 SPAG6  | 1 |
| hsa-miR-4747 NM_172242 SPAG6  | 1 |
| hsa-miR-4755 NM_172242 SPAG6  | 1 |
| hsa-miR-4781 NM_172242 SPAG6  | 1 |
| hsa-miR-5196 NM_172242 SPAG6  | 1 |

|              |           |       |   |
|--------------|-----------|-------|---|
| hsa-miR-664t | NM_172242 | SPAG6 | 1 |
| hsa-miR-5684 | NM_172242 | SPAG6 | 1 |
| hsa-miR-5739 | NM_172242 | SPAG6 | 1 |
| hsa-miR-6513 | NM_172242 | SPAG6 | 1 |
| hsa-miR-6515 | NM_172242 | SPAG6 | 1 |
| hsa-miR-6719 | NM_172242 | SPAG6 | 1 |
| hsa-miR-6724 | NM_172242 | SPAG6 | 1 |
| hsa-miR-6731 | NM_172242 | SPAG6 | 1 |
| hsa-miR-6738 | NM_172242 | SPAG6 | 1 |
| hsa-miR-6749 | NM_172242 | SPAG6 | 1 |
| hsa-miR-6749 | NM_172242 | SPAG6 | 1 |
| hsa-miR-6753 | NM_172242 | SPAG6 | 1 |
| hsa-miR-6754 | NM_172242 | SPAG6 | 1 |
| hsa-miR-6758 | NM_172242 | SPAG6 | 1 |
| hsa-miR-6760 | NM_172242 | SPAG6 | 1 |
| hsa-miR-6771 | NM_172242 | SPAG6 | 1 |
| hsa-miR-6773 | NM_172242 | SPAG6 | 1 |
| hsa-miR-6778 | NM_172242 | SPAG6 | 1 |
| hsa-miR-6781 | NM_172242 | SPAG6 | 1 |
| hsa-miR-6784 | NM_172242 | SPAG6 | 1 |
| hsa-miR-6797 | NM_172242 | SPAG6 | 1 |
| hsa-miR-6810 | NM_172242 | SPAG6 | 1 |
| hsa-miR-6819 | NM_172242 | SPAG6 | 1 |
| hsa-miR-6827 | NM_172242 | SPAG6 | 1 |
| hsa-miR-6828 | NM_172242 | SPAG6 | 1 |
| hsa-miR-6837 | NM_172242 | SPAG6 | 1 |
| hsa-miR-6845 | NM_172242 | SPAG6 | 1 |
| hsa-miR-6846 | NM_172242 | SPAG6 | 1 |
| hsa-miR-6853 | NM_172242 | SPAG6 | 1 |
| hsa-miR-6769 | NM_172242 | SPAG6 | 1 |
| hsa-miR-6860 | NM_172242 | SPAG6 | 1 |
| hsa-miR-6862 | NM_172242 | SPAG6 | 1 |
| hsa-miR-6865 | NM_172242 | SPAG6 | 1 |
| hsa-miR-6865 | NM_172242 | SPAG6 | 1 |
| hsa-miR-6867 | NM_172242 | SPAG6 | 1 |
| hsa-miR-6875 | NM_172242 | SPAG6 | 1 |
| hsa-miR-6879 | NM_172242 | SPAG6 | 1 |
| hsa-miR-6883 | NM_172242 | SPAG6 | 1 |
| hsa-miR-6884 | NM_172242 | SPAG6 | 1 |
| hsa-miR-6890 | NM_172242 | SPAG6 | 1 |
| hsa-miR-6891 | NM_172242 | SPAG6 | 1 |
| hsa-miR-7107 | NM_172242 | SPAG6 | 1 |
| hsa-miR-7110 | NM_172242 | SPAG6 | 1 |
| hsa-miR-7845 | NM_172242 | SPAG6 | 1 |
| hsa-miR-7846 | NM_172242 | SPAG6 | 1 |
| hsa-miR-9986 | NM_172242 | SPAG6 | 1 |
| hsa-miR-1022 | NM_172242 | SPAG6 | 1 |
| hsa-miR-197- | NM_012443 | SPAG6 | 1 |
| hsa-miR-210- | NM_012443 | SPAG6 | 1 |
| hsa-miR-125a | NM_012443 | SPAG6 | 1 |
| hsa-miR-185- | NM_012443 | SPAG6 | 1 |
| hsa-miR-330- | NM_012443 | SPAG6 | 1 |
| hsa-miR-326  | NM_012443 | SPAG6 | 1 |
| hsa-miR-423- | NM_012443 | SPAG6 | 1 |
| hsa-miR-450a | NM_012443 | SPAG6 | 1 |
| hsa-miR-412- | NM_012443 | SPAG6 | 1 |
| hsa-miR-376t | NM_012443 | SPAG6 | 1 |
| hsa-miR-520g | NM_012443 | SPAG6 | 1 |
| hsa-miR-520h | NM_012443 | SPAG6 | 1 |
| hsa-miR-500a | NM_012443 | SPAG6 | 1 |
| hsa-miR-574- | NM_012443 | SPAG6 | 1 |
| hsa-miR-574- | NM_012443 | SPAG6 | 1 |
| hsa-miR-608  | NM_012443 | SPAG6 | 1 |
| hsa-miR-610  | NM_012443 | SPAG6 | 1 |
| hsa-miR-320c | NM_012443 | SPAG6 | 1 |
| hsa-miR-1185 | NM_012443 | SPAG6 | 1 |
| hsa-miR-874- | NM_012443 | SPAG6 | 1 |
| hsa-miR-744- | NM_012443 | SPAG6 | 1 |
| hsa-miR-887- | NM_012443 | SPAG6 | 1 |
| hsa-miR-760  | NM_012443 | SPAG6 | 1 |
| hsa-miR-301t | NM_012443 | SPAG6 | 1 |
| hsa-miR-297  | NM_012443 | SPAG6 | 1 |
| hsa-miR-1207 | NM_012443 | SPAG6 | 1 |
| hsa-miR-1270 | NM_012443 | SPAG6 | 1 |
| hsa-miR-1288 | NM_012443 | SPAG6 | 1 |
| hsa-miR-1255 | NM_012443 | SPAG6 | 1 |
| hsa-miR-513c | NM_012443 | SPAG6 | 1 |
| hsa-miR-1470 | NM_012443 | SPAG6 | 1 |
| hsa-miR-3122 | NM_012443 | SPAG6 | 1 |
| hsa-miR-3149 | NM_012443 | SPAG6 | 1 |
| hsa-miR-3160 | NM_012443 | SPAG6 | 1 |
| hsa-miR-3162 | NM_012443 | SPAG6 | 1 |
| hsa-miR-3166 | NM_012443 | SPAG6 | 1 |
| hsa-miR-3189 | NM_012443 | SPAG6 | 1 |
| hsa-miR-514t | NM_012443 | SPAG6 | 1 |
| hsa-miR-4299 | NM_012443 | SPAG6 | 1 |
| hsa-miR-4316 | NM_012443 | SPAG6 | 1 |
| hsa-miR-4256 | NM_012443 | SPAG6 | 1 |
| hsa-miR-4253 | NM_012443 | SPAG6 | 1 |
| hsa-miR-4280 | NM_012443 | SPAG6 | 1 |
| hsa-miR-3620 | NM_012443 | SPAG6 | 1 |
| hsa-miR-3922 | NM_012443 | SPAG6 | 1 |
| hsa-miR-4429 | NM_012443 | SPAG6 | 1 |
| hsa-miR-4451 | NM_012443 | SPAG6 | 1 |

|                |            |       |            |
|----------------|------------|-------|------------|
| hsa-miR-4489   | NM_012443  | SPAG6 | 1          |
| hsa-miR-4508   | NM_012443  | SPAG6 | 1          |
| hsa-miR-4632   | NM_012443  | SPAG6 | 1          |
| hsa-miR-464C   | NM_012443  | SPAG6 | 1          |
| hsa-miR-4655   | NM_012443  | SPAG6 | 1          |
| hsa-miR-469C   | NM_012443  | SPAG6 | 1          |
| hsa-miR-4704   | NM_012443  | SPAG6 | 1          |
| hsa-miR-4723   | NM_012443  | SPAG6 | 1          |
| hsa-miR-4731   | NM_012443  | SPAG6 | 1          |
| hsa-miR-4747   | NM_012443  | SPAG6 | 1          |
| hsa-miR-4755   | NM_012443  | SPAG6 | 1          |
| hsa-miR-4781   | NM_012443  | SPAG6 | 1          |
| hsa-miR-5196   | NM_012443  | SPAG6 | 1          |
| hsa-miR-664b   | NM_012443  | SPAG6 | 1          |
| hsa-miR-5684   | NM_012443  | SPAG6 | 1          |
| hsa-miR-5735   | NM_012443  | SPAG6 | 1          |
| hsa-miR-6513   | NM_012443  | SPAG6 | 1          |
| hsa-miR-6515   | NM_012443  | SPAG6 | 1          |
| hsa-miR-6719   | NM_012443  | SPAG6 | 1          |
| hsa-miR-6724   | NM_012443  | SPAG6 | 1          |
| hsa-miR-6731   | NM_012443  | SPAG6 | 1          |
| hsa-miR-6738   | NM_012443  | SPAG6 | 1          |
| hsa-miR-6745   | NM_012443  | SPAG6 | 1          |
| hsa-miR-6745   | NM_012443  | SPAG6 | 1          |
| hsa-miR-6753   | NM_012443  | SPAG6 | 1          |
| hsa-miR-6754   | NM_012443  | SPAG6 | 1          |
| hsa-miR-6758   | NM_012443  | SPAG6 | 1          |
| hsa-miR-676C   | NM_012443  | SPAG6 | 1          |
| hsa-miR-6771   | NM_012443  | SPAG6 | 1          |
| hsa-miR-6773   | NM_012443  | SPAG6 | 1          |
| hsa-miR-6778   | NM_012443  | SPAG6 | 1          |
| hsa-miR-6781   | NM_012443  | SPAG6 | 1          |
| hsa-miR-6784   | NM_012443  | SPAG6 | 1          |
| hsa-miR-6797   | NM_012443  | SPAG6 | 1          |
| hsa-miR-681C   | NM_012443  | SPAG6 | 1          |
| hsa-miR-6819   | NM_012443  | SPAG6 | 1          |
| hsa-miR-6827   | NM_012443  | SPAG6 | 1          |
| hsa-miR-6828   | NM_012443  | SPAG6 | 1          |
| hsa-miR-6837   | NM_012443  | SPAG6 | 1          |
| hsa-miR-6845   | NM_012443  | SPAG6 | 1          |
| hsa-miR-6846   | NM_012443  | SPAG6 | 1          |
| hsa-miR-6853   | NM_012443  | SPAG6 | 1          |
| hsa-miR-6765   | NM_012443  | SPAG6 | 1          |
| hsa-miR-686C   | NM_012443  | SPAG6 | 1          |
| hsa-miR-6862   | NM_012443  | SPAG6 | 1          |
| hsa-miR-6865   | NM_012443  | SPAG6 | 1          |
| hsa-miR-6865   | NM_012443  | SPAG6 | 1          |
| hsa-miR-6867   | NM_012443  | SPAG6 | 1          |
| hsa-miR-6875   | NM_012443  | SPAG6 | 1          |
| hsa-miR-6875   | NM_012443  | SPAG6 | 1          |
| hsa-miR-6883   | NM_012443  | SPAG6 | 1          |
| hsa-miR-6884   | NM_012443  | SPAG6 | 1          |
| hsa-miR-689C   | NM_012443  | SPAG6 | 1          |
| hsa-miR-6891   | NM_012443  | SPAG6 | 1          |
| hsa-miR-7107   | NM_012443  | SPAG6 | 1          |
| hsa-miR-711C   | NM_012443  | SPAG6 | 1          |
| hsa-miR-7845   | NM_012443  | SPAG6 | 1          |
| hsa-miR-7846   | NM_012443  | SPAG6 | 1          |
| hsa-miR-9986   | NM_012443  | SPAG6 | 1          |
| hsa-miR-1022   | NM_012443  | SPAG6 | 1          |
| hsa-miR-3918   | NM_0012563 | CHST9 | 0.95       |
| hsa-miR-502-   | NM_0012563 | CHST9 | 0.95384615 |
| hsa-miR-584-   | NM_0012563 | CHST9 | 0.95384615 |
| hsa-miR-3074   | NM_0012563 | CHST9 | 0.95384615 |
| hsa-miR-4265   | NM_0012563 | CHST9 | 0.95384615 |
| hsa-miR-6716   | NM_0012563 | CHST9 | 0.95384615 |
| hsa-miR-7856   | NM_0012563 | CHST9 | 0.95384615 |
| hsa-miR-502-   | NM_031422  | CHST9 | 0.95384615 |
| hsa-miR-3074   | NM_031422  | CHST9 | 0.95384615 |
| hsa-miR-4265   | NM_031422  | CHST9 | 0.95384615 |
| hsa-miR-6823   | NM_031422  | CHST9 | 0.95384615 |
| hsa-miR-7856   | NM_031422  | CHST9 | 0.95384615 |
| hsa-miR-4265   | XM_0170260 | CHST9 | 0.95384615 |
| hsa-miR-4495   | XM_0170260 | CHST9 | 0.95384615 |
| hsa-miR-6872   | XM_0170260 | CHST9 | 0.95384615 |
| hsa-miR-650C   | NM_0012563 | CHST9 | 0.95512821 |
| hsa-miR-650C   | NM_031422  | CHST9 | 0.95512821 |
| hsa-miR-1972   | NM_0012563 | CHST9 | 0.95512821 |
| hsa-miR-1972   | NM_031422  | CHST9 | 0.95512821 |
| hsa-miR-6797   | NM_0012563 | CHST9 | 0.95604396 |
| hsa-miR-8085   | NM_0012563 | CHST9 | 0.95604396 |
| hsa-miR-6797   | NM_031422  | CHST9 | 0.95604396 |
| hsa-miR-8085   | NM_031422  | CHST9 | 0.95604396 |
| hsa-let-7a-2-3 | NM_0012563 | CHST9 | 0.96153846 |
| hsa-miR-30d-   | NM_0012563 | CHST9 | 0.96153846 |
| hsa-miR-27b-   | NM_0012563 | CHST9 | 0.96153846 |
| hsa-miR-133a   | NM_0012563 | CHST9 | 0.96153846 |
| hsa-miR-134-   | NM_0012563 | CHST9 | 0.96153846 |
| hsa-miR-370-   | NM_0012563 | CHST9 | 0.96153846 |
| hsa-miR-378a   | NM_0012563 | CHST9 | 0.96153846 |
| hsa-miR-133b   | NM_0012563 | CHST9 | 0.96153846 |
| hsa-miR-483-   | NM_0012563 | CHST9 | 0.96153846 |
| hsa-miR-432-   | NM_0012563 | CHST9 | 0.96153846 |
| hsa-miR-181d   | NM_0012563 | CHST9 | 0.96153846 |

|                               |            |
|-------------------------------|------------|
| hsa-miR-514a NM_0012563 CHST9 | 0.96153846 |
| hsa-miR-587 NM_0012563 CHST9  | 0.96153846 |
| hsa-miR-1224 NM_0012563 CHST9 | 0.96153846 |
| hsa-miR-670- NM_0012563 CHST9 | 0.96153846 |
| hsa-miR-670- NM_0012563 CHST9 | 0.96153846 |
| hsa-miR-1262 NM_0012563 CHST9 | 0.96153846 |
| hsa-miR-1272 NM_0012563 CHST9 | 0.96153846 |
| hsa-miR-3158 NM_0012563 CHST9 | 0.96153846 |
| hsa-miR-3176 NM_0012563 CHST9 | 0.96153846 |
| hsa-miR-4255 NM_0012563 CHST9 | 0.96153846 |
| hsa-miR-3619 NM_0012563 CHST9 | 0.96153846 |
| hsa-miR-3689 NM_0012563 CHST9 | 0.96153846 |
| hsa-miR-4463 NM_0012563 CHST9 | 0.96153846 |
| hsa-miR-450C NM_0012563 CHST9 | 0.96153846 |
| hsa-miR-4657 NM_0012563 CHST9 | 0.96153846 |
| hsa-miR-4697 NM_0012563 CHST9 | 0.96153846 |
| hsa-miR-4784 NM_0012563 CHST9 | 0.96153846 |
| hsa-miR-4793 NM_0012563 CHST9 | 0.96153846 |
| hsa-miR-5089 NM_0012563 CHST9 | 0.96153846 |
| hsa-miR-5698 NM_0012563 CHST9 | 0.96153846 |
| hsa-miR-6726 NM_0012563 CHST9 | 0.96153846 |
| hsa-miR-6736 NM_0012563 CHST9 | 0.96153846 |
| hsa-miR-6778 NM_0012563 CHST9 | 0.96153846 |
| hsa-miR-6824 NM_0012563 CHST9 | 0.96153846 |
| hsa-miR-6838 NM_0012563 CHST9 | 0.96153846 |
| hsa-miR-6877 NM_0012563 CHST9 | 0.96153846 |
| hsa-miR-6881 NM_0012563 CHST9 | 0.96153846 |
| hsa-miR-7114 NM_0012563 CHST9 | 0.96153846 |
| hsa-miR-7154 NM_0012563 CHST9 | 0.96153846 |
| hsa-miR-7161 NM_0012563 CHST9 | 0.96153846 |
| hsa-miR-1039 NM_0012563 CHST9 | 0.96153846 |
| hsa-miR-30d- NM_031422 CHST9  | 0.96153846 |
| hsa-miR-134- NM_031422 CHST9  | 0.96153846 |
| hsa-miR-370- NM_031422 CHST9  | 0.96153846 |
| hsa-miR-181d NM_031422 CHST9  | 0.96153846 |
| hsa-miR-516t NM_031422 CHST9  | 0.96153846 |
| hsa-miR-514a NM_031422 CHST9  | 0.96153846 |
| hsa-miR-587 NM_031422 CHST9   | 0.96153846 |
| hsa-miR-33b- NM_031422 CHST9  | 0.96153846 |
| hsa-miR-659- NM_031422 CHST9  | 0.96153846 |
| hsa-miR-670- NM_031422 CHST9  | 0.96153846 |
| hsa-miR-1304 NM_031422 CHST9  | 0.96153846 |
| hsa-miR-1262 NM_031422 CHST9  | 0.96153846 |
| hsa-miR-2861 NM_031422 CHST9  | 0.96153846 |
| hsa-miR-4255 NM_031422 CHST9  | 0.96153846 |
| hsa-miR-3619 NM_031422 CHST9  | 0.96153846 |
| hsa-miR-3689 NM_031422 CHST9  | 0.96153846 |
| hsa-miR-4436 NM_031422 CHST9  | 0.96153846 |
| hsa-miR-4463 NM_031422 CHST9  | 0.96153846 |
| hsa-miR-450C NM_031422 CHST9  | 0.96153846 |
| hsa-miR-4502 NM_031422 CHST9  | 0.96153846 |
| hsa-miR-4657 NM_031422 CHST9  | 0.96153846 |
| hsa-miR-4697 NM_031422 CHST9  | 0.96153846 |
| hsa-miR-4784 NM_031422 CHST9  | 0.96153846 |
| hsa-miR-4793 NM_031422 CHST9  | 0.96153846 |
| hsa-miR-5089 NM_031422 CHST9  | 0.96153846 |
| hsa-miR-6726 NM_031422 CHST9  | 0.96153846 |
| hsa-miR-6736 NM_031422 CHST9  | 0.96153846 |
| hsa-miR-6742 NM_031422 CHST9  | 0.96153846 |
| hsa-miR-6817 NM_031422 CHST9  | 0.96153846 |
| hsa-miR-6824 NM_031422 CHST9  | 0.96153846 |
| hsa-miR-6877 NM_031422 CHST9  | 0.96153846 |
| hsa-miR-7114 NM_031422 CHST9  | 0.96153846 |
| hsa-miR-7161 NM_031422 CHST9  | 0.96153846 |
| hsa-miR-1039 NM_031422 CHST9  | 0.96153846 |
| hsa-miR-29b- XM_0170260 CHST9 | 0.96153846 |
| hsa-miR-370- XM_0170260 CHST9 | 0.96153846 |
| hsa-miR-181c XM_0170260 CHST9 | 0.96153846 |
| hsa-miR-585- XM_0170260 CHST9 | 0.96153846 |
| hsa-miR-587 XM_0170260 CHST9  | 0.96153846 |
| hsa-miR-601 XM_0170260 CHST9  | 0.96153846 |
| hsa-miR-4327 XM_0170260 CHST9 | 0.96153846 |
| hsa-miR-4436 XM_0170260 CHST9 | 0.96153846 |
| hsa-miR-4463 XM_0170260 CHST9 | 0.96153846 |
| hsa-miR-4633 XM_0170260 CHST9 | 0.96153846 |
| hsa-miR-4657 XM_0170260 CHST9 | 0.96153846 |
| hsa-miR-4768 XM_0170260 CHST9 | 0.96153846 |
| hsa-miR-4784 XM_0170260 CHST9 | 0.96153846 |
| hsa-miR-5739 XM_0170260 CHST9 | 0.96153846 |
| hsa-miR-6722 XM_0170260 CHST9 | 0.96153846 |
| hsa-miR-6727 XM_0170260 CHST9 | 0.96153846 |
| hsa-miR-6729 XM_0170260 CHST9 | 0.96153846 |
| hsa-miR-6748 XM_0170260 CHST9 | 0.96153846 |
| hsa-miR-6881 XM_0170260 CHST9 | 0.96153846 |
| hsa-miR-6883 XM_0170260 CHST9 | 0.96153846 |
| hsa-miR-7109 XM_0170260 CHST9 | 0.96153846 |
| hsa-miR-7114 XM_0170260 CHST9 | 0.96153846 |
| hsa-miR-7154 XM_0170260 CHST9 | 0.96153846 |
| hsa-miR-8071 XM_0170260 CHST9 | 0.96153846 |
| hsa-miR-548v NM_0012563 CHST9 | 0.96923077 |
| hsa-miR-6823 NM_0012563 CHST9 | 0.96923077 |
| hsa-miR-1304 NM_031422 CHST9  | 0.96923077 |
| hsa-miR-548v NM_031422 CHST9  | 0.96923077 |
| hsa-miR-6823 NM_031422 CHST9  | 0.96923077 |

|                                |            |
|--------------------------------|------------|
| hsa-miR-1304 XM_0170260 CHST9  | 0.96923077 |
| hsa-miR-548v XM_0170260 CHST9  | 0.96923077 |
| hsa-miR-29c-1 NM_0012563 CHST9 | 0.97435897 |
| hsa-miR-361-1 NM_0012563 CHST9 | 0.97435897 |
| hsa-miR-379-1 NM_0012563 CHST9 | 0.97435897 |
| hsa-miR-20b-1 NM_0012563 CHST9 | 0.97435897 |
| hsa-miR-181d NM_0012563 CHST9  | 0.97435897 |
| hsa-miR-449b NM_0012563 CHST9  | 0.97435897 |
| hsa-miR-378d NM_0012563 CHST9  | 0.97435897 |
| hsa-miR-4294 NM_0012563 CHST9  | 0.97435897 |
| hsa-miR-4292 NM_0012563 CHST9  | 0.97435897 |
| hsa-miR-3677 NM_0012563 CHST9  | 0.97435897 |
| hsa-miR-3713 NM_0012563 CHST9  | 0.97435897 |
| hsa-miR-642b NM_0012563 CHST9  | 0.97435897 |
| hsa-miR-4462 NM_0012563 CHST9  | 0.97435897 |
| hsa-miR-4725 NM_0012563 CHST9  | 0.97435897 |
| hsa-miR-4756 NM_0012563 CHST9  | 0.97435897 |
| hsa-miR-4756 NM_0012563 CHST9  | 0.97435897 |
| hsa-miR-6788 NM_0012563 CHST9  | 0.97435897 |
| hsa-miR-6885 NM_0012563 CHST9  | 0.97435897 |
| hsa-miR-8052 NM_0012563 CHST9  | 0.97435897 |
| hsa-miR-29c-1 NM_031422 CHST9  | 0.97435897 |
| hsa-miR-379-1 NM_031422 CHST9  | 0.97435897 |
| hsa-miR-20b-1 NM_031422 CHST9  | 0.97435897 |
| hsa-miR-642a NM_031422 CHST9   | 0.97435897 |
| hsa-miR-378d NM_031422 CHST9   | 0.97435897 |
| hsa-miR-4292 NM_031422 CHST9   | 0.97435897 |
| hsa-miR-3713 NM_031422 CHST9   | 0.97435897 |
| hsa-miR-642b NM_031422 CHST9   | 0.97435897 |
| hsa-miR-4644 NM_031422 CHST9   | 0.97435897 |
| hsa-miR-4725 NM_031422 CHST9   | 0.97435897 |
| hsa-miR-478c NM_031422 CHST9   | 0.97435897 |
| hsa-miR-6788 NM_031422 CHST9   | 0.97435897 |
| hsa-miR-6885 NM_031422 CHST9   | 0.97435897 |
| hsa-miR-326 XM_0170260 CHST9   | 0.97435897 |
| hsa-miR-181d XM_0170260 CHST9  | 0.97435897 |
| hsa-miR-642a XM_0170260 CHST9  | 0.97435897 |
| hsa-miR-1178 XM_0170260 CHST9  | 0.97435897 |
| hsa-miR-3155 XM_0170260 CHST9  | 0.97435897 |
| hsa-miR-4292 XM_0170260 CHST9  | 0.97435897 |
| hsa-miR-3943 XM_0170260 CHST9  | 0.97435897 |
| hsa-miR-642b XM_0170260 CHST9  | 0.97435897 |
| hsa-miR-3155 XM_0170260 CHST9  | 0.97435897 |
| hsa-miR-4725 XM_0170260 CHST9  | 0.97435897 |
| hsa-miR-6745 XM_0170260 CHST9  | 0.97435897 |
| hsa-miR-6878 XM_0170260 CHST9  | 0.97435897 |
| hsa-miR-6885 XM_0170260 CHST9  | 0.97435897 |
| hsa-miR-808c XM_0170260 CHST9  | 0.97435897 |
| hsa-miR-520e NM_0012563 CHST9  | 0.97435897 |
| hsa-miR-679c NM_0012563 CHST9  | 0.97435897 |
| hsa-miR-6865 NM_0012563 CHST9  | 0.97435897 |
| hsa-miR-6865 NM_031422 CHST9   | 0.97435897 |
| hsa-miR-520e XM_0170260 CHST9  | 0.97435897 |
| hsa-miR-494-1 NM_0012563 CHST9 | 0.98076923 |
| hsa-miR-1303 NM_0012563 CHST9  | 0.98076923 |
| hsa-miR-3131 NM_0012563 CHST9  | 0.98076923 |
| hsa-miR-3622 NM_0012563 CHST9  | 0.98076923 |
| hsa-miR-3622 NM_0012563 CHST9  | 0.98076923 |
| hsa-miR-5006 NM_0012563 CHST9  | 0.98076923 |
| hsa-miR-5572 NM_0012563 CHST9  | 0.98076923 |
| hsa-miR-6134 NM_0012563 CHST9  | 0.98076923 |
| hsa-miR-6757 NM_0012563 CHST9  | 0.98076923 |
| hsa-miR-6784 NM_0012563 CHST9  | 0.98076923 |
| hsa-miR-680c NM_0012563 CHST9  | 0.98076923 |
| hsa-miR-6812 NM_0012563 CHST9  | 0.98076923 |
| hsa-miR-494-1 NM_031422 CHST9  | 0.98076923 |
| hsa-miR-1236 NM_031422 CHST9   | 0.98076923 |
| hsa-miR-1303 NM_031422 CHST9   | 0.98076923 |
| hsa-miR-126c NM_031422 CHST9   | 0.98076923 |
| hsa-miR-3141 NM_031422 CHST9   | 0.98076923 |
| hsa-miR-3622 NM_031422 CHST9   | 0.98076923 |
| hsa-miR-3918 NM_031422 CHST9   | 0.98076923 |
| hsa-miR-3926 NM_031422 CHST9   | 0.98076923 |
| hsa-miR-4436 NM_031422 CHST9   | 0.98076923 |
| hsa-miR-5572 NM_031422 CHST9   | 0.98076923 |
| hsa-miR-5735 NM_031422 CHST9   | 0.98076923 |
| hsa-miR-680c NM_031422 CHST9   | 0.98076923 |
| hsa-miR-6812 NM_031422 CHST9   | 0.98076923 |
| hsa-miR-1035 NM_031422 CHST9   | 0.98076923 |
| hsa-miR-197-1 XM_0170260 CHST9 | 0.98076923 |
| hsa-miR-877-1 XM_0170260 CHST9 | 0.98076923 |
| hsa-miR-1303 XM_0170260 CHST9  | 0.98076923 |
| hsa-miR-126c XM_0170260 CHST9  | 0.98076923 |
| hsa-miR-1538 XM_0170260 CHST9  | 0.98076923 |
| hsa-miR-426c XM_0170260 CHST9  | 0.98076923 |
| hsa-miR-4281 XM_0170260 CHST9  | 0.98076923 |
| hsa-miR-3622 XM_0170260 CHST9  | 0.98076923 |
| hsa-miR-3918 XM_0170260 CHST9  | 0.98076923 |
| hsa-miR-471c XM_0170260 CHST9  | 0.98076923 |
| hsa-miR-4741 XM_0170260 CHST9  | 0.98076923 |
| hsa-miR-5196 XM_0170260 CHST9  | 0.98076923 |
| hsa-miR-5572 XM_0170260 CHST9  | 0.98076923 |
| hsa-miR-6777 XM_0170260 CHST9  | 0.98076923 |
| hsa-miR-6851 XM_0170260 CHST9  | 0.98076923 |
| hsa-miR-6852 XM_0170260 CHST9  | 0.98076923 |

|                                |            |
|--------------------------------|------------|
| hsa-miR-689c XM_0170260 CHST9  | 0.98076923 |
| hsa-miR-6798 NM_031422 CHST9   | 0.98461539 |
| hsa-miR-129-1 NM_0012563 CHST9 | 0.98717949 |
| hsa-miR-129-2 NM_031422 CHST9  | 0.98717949 |
| hsa-miR-1245 XM_0170260 CHST9  | 0.99145299 |
| hsa-miR-1276 XM_0170260 CHST9  | 0.99145299 |
| hsa-miR-4672 XM_0170260 CHST9  | 0.99145299 |
| hsa-let-7a-5p NM_0012563 CHST9 | 1          |
| hsa-let-7b-5p NM_0012563 CHST9 | 1          |
| hsa-let-7c-5p NM_0012563 CHST9 | 1          |
| hsa-let-7d-5p NM_0012563 CHST9 | 1          |
| hsa-let-7e-5p NM_0012563 CHST9 | 1          |
| hsa-let-7e-5p NM_0012563 CHST9 | 1          |
| hsa-let-7f-5p NM_0012563 CHST9 | 1          |
| hsa-miR-15a-1 NM_0012563 CHST9 | 1          |
| hsa-miR-15a-2 NM_0012563 CHST9 | 1          |
| hsa-miR-17-5j NM_0012563 CHST9 | 1          |
| hsa-miR-20a-1 NM_0012563 CHST9 | 1          |
| hsa-miR-24-1 NM_0012563 CHST9  | 1          |
| hsa-miR-24-3j NM_0012563 CHST9 | 1          |
| hsa-miR-24-2 NM_0012563 CHST9  | 1          |
| hsa-miR-26a-1 NM_0012563 CHST9 | 1          |
| hsa-miR-27a-1 NM_0012563 CHST9 | 1          |
| hsa-miR-28-5j NM_0012563 CHST9 | 1          |
| hsa-miR-29a-1 NM_0012563 CHST9 | 1          |
| hsa-miR-30a-1 NM_0012563 CHST9 | 1          |
| hsa-miR-31-5j NM_0012563 CHST9 | 1          |
| hsa-miR-31-3j NM_0012563 CHST9 | 1          |
| hsa-miR-31-3j NM_0012563 CHST9 | 1          |
| hsa-miR-92a-1 NM_0012563 CHST9 | 1          |
| hsa-miR-93-5j NM_0012563 CHST9 | 1          |
| hsa-miR-101-1 NM_0012563 CHST9 | 1          |
| hsa-miR-103a NM_0012563 CHST9  | 1          |
| hsa-miR-103a NM_0012563 CHST9  | 1          |
| hsa-miR-103a NM_0012563 CHST9  | 1          |
| hsa-miR-103a NM_0012563 CHST9  | 1          |
| hsa-miR-105-1 NM_0012563 CHST9 | 1          |
| hsa-miR-106a NM_0012563 CHST9  | 1          |
| hsa-miR-106a NM_0012563 CHST9  | 1          |
| hsa-miR-196a NM_0012563 CHST9  | 1          |
| hsa-miR-197-1 NM_0012563 CHST9 | 1          |
| hsa-miR-197-2 NM_0012563 CHST9 | 1          |
| hsa-miR-198 NM_0012563 CHST9   | 1          |
| hsa-miR-199a NM_0012563 CHST9  | 1          |
| hsa-miR-199a NM_0012563 CHST9  | 1          |
| hsa-miR-30c-1 NM_0012563 CHST9 | 1          |
| hsa-miR-10a-1 NM_0012563 CHST9 | 1          |
| hsa-miR-34a-1 NM_0012563 CHST9 | 1          |
| hsa-miR-181a NM_0012563 CHST9  | 1          |
| hsa-miR-183-1 NM_0012563 CHST9 | 1          |
| hsa-miR-183-2 NM_0012563 CHST9 | 1          |
| hsa-miR-187-1 NM_0012563 CHST9 | 1          |
| hsa-miR-187-2 NM_0012563 CHST9 | 1          |
| hsa-miR-199b NM_0012563 CHST9  | 1          |
| hsa-miR-199b NM_0012563 CHST9  | 1          |
| hsa-miR-204-1 NM_0012563 CHST9 | 1          |
| hsa-miR-205-1 NM_0012563 CHST9 | 1          |
| hsa-miR-205-2 NM_0012563 CHST9 | 1          |
| hsa-miR-210-1 NM_0012563 CHST9 | 1          |
| hsa-miR-215-1 NM_0012563 CHST9 | 1          |
| hsa-miR-216a NM_0012563 CHST9  | 1          |
| hsa-miR-219a NM_0012563 CHST9  | 1          |
| hsa-miR-221-1 NM_0012563 CHST9 | 1          |
| hsa-miR-224-1 NM_0012563 CHST9 | 1          |
| hsa-miR-224-2 NM_0012563 CHST9 | 1          |
| hsa-let-7g-5p NM_0012563 CHST9 | 1          |
| hsa-let-7i-5p NM_0012563 CHST9 | 1          |
| hsa-let-7i-3p NM_0012563 CHST9 | 1          |
| hsa-miR-27b-1 NM_0012563 CHST9 | 1          |
| hsa-miR-30b-1 NM_0012563 CHST9 | 1          |
| hsa-miR-30b-2 NM_0012563 CHST9 | 1          |
| hsa-miR-124-1 NM_0012563 CHST9 | 1          |
| hsa-miR-124-2 NM_0012563 CHST9 | 1          |
| hsa-miR-135a NM_0012563 CHST9  | 1          |
| hsa-miR-138-1 NM_0012563 CHST9 | 1          |
| hsa-miR-143-1 NM_0012563 CHST9 | 1          |
| hsa-miR-145-1 NM_0012563 CHST9 | 1          |
| hsa-miR-145-2 NM_0012563 CHST9 | 1          |
| hsa-miR-125a NM_0012563 CHST9  | 1          |
| hsa-miR-125b NM_0012563 CHST9  | 1          |
| hsa-miR-125c NM_0012563 CHST9  | 1          |
| hsa-miR-127-1 NM_0012563 CHST9 | 1          |
| hsa-miR-134-1 NM_0012563 CHST9 | 1          |
| hsa-miR-138-2 NM_0012563 CHST9 | 1          |
| hsa-miR-146a NM_0012563 CHST9  | 1          |
| hsa-miR-149-1 NM_0012563 CHST9 | 1          |
| hsa-miR-149-2 NM_0012563 CHST9 | 1          |
| hsa-miR-150-1 NM_0012563 CHST9 | 1          |
| hsa-miR-150-2 NM_0012563 CHST9 | 1          |
| hsa-miR-185-1 NM_0012563 CHST9 | 1          |
| hsa-miR-185-2 NM_0012563 CHST9 | 1          |
| hsa-miR-188-1 NM_0012563 CHST9 | 1          |
| hsa-miR-193a NM_0012563 CHST9  | 1          |
| hsa-miR-320a NM_0012563 CHST9  | 1          |



|                                |   |
|--------------------------------|---|
| hsa-miR-128-: NM_0012563 CHST9 | 1 |
| hsa-miR-106t NM_0012563 CHST9  | 1 |
| hsa-miR-30c- NM_0012563 CHST9  | 1 |
| hsa-miR-219a NM_0012563 CHST9  | 1 |
| hsa-miR-219a NM_0012563 CHST9  | 1 |
| hsa-miR-34b-: NM_0012563 CHST9 | 1 |
| hsa-miR-301a NM_0012563 CHST9  | 1 |
| hsa-miR-99b-: NM_0012563 CHST9 | 1 |
| hsa-miR-99b-: NM_0012563 CHST9 | 1 |
| hsa-miR-296-: NM_0012563 CHST9 | 1 |
| hsa-miR-296-: NM_0012563 CHST9 | 1 |
| hsa-miR-130t NM_0012563 CHST9  | 1 |
| hsa-miR-30e-: NM_0012563 CHST9 | 1 |
| hsa-miR-361-: NM_0012563 CHST9 | 1 |
| hsa-miR-363-: NM_0012563 CHST9 | 1 |
| hsa-miR-365a NM_0012563 CHST9  | 1 |
| hsa-miR-302c NM_0012563 CHST9  | 1 |
| hsa-miR-376c NM_0012563 CHST9  | 1 |
| hsa-miR-375-: NM_0012563 CHST9 | 1 |
| hsa-miR-377-: NM_0012563 CHST9 | 1 |
| hsa-miR-380-: NM_0012563 CHST9 | 1 |
| hsa-miR-381-: NM_0012563 CHST9 | 1 |
| hsa-miR-381-: NM_0012563 CHST9 | 1 |
| hsa-miR-381-: NM_0012563 CHST9 | 1 |
| hsa-miR-328-: NM_0012563 CHST9 | 1 |
| hsa-miR-342-: NM_0012563 CHST9 | 1 |
| hsa-miR-323a NM_0012563 CHST9  | 1 |
| hsa-miR-323a NM_0012563 CHST9  | 1 |
| hsa-miR-151a NM_0012563 CHST9  | 1 |
| hsa-miR-151a NM_0012563 CHST9  | 1 |
| hsa-miR-331-: NM_0012563 CHST9 | 1 |
| hsa-miR-339-: NM_0012563 CHST9 | 1 |
| hsa-miR-325 NM_0012563 CHST9   | 1 |
| hsa-miR-422a NM_0012563 CHST9  | 1 |
| hsa-miR-425-: NM_0012563 CHST9 | 1 |
| hsa-miR-449a NM_0012563 CHST9  | 1 |
| hsa-miR-433-: NM_0012563 CHST9 | 1 |
| hsa-miR-329-: NM_0012563 CHST9 | 1 |
| hsa-miR-329-: NM_0012563 CHST9 | 1 |
| hsa-miR-412-: NM_0012563 CHST9 | 1 |
| hsa-miR-483-: NM_0012563 CHST9 | 1 |
| hsa-miR-485-: NM_0012563 CHST9 | 1 |
| hsa-miR-486-: NM_0012563 CHST9 | 1 |
| hsa-miR-487a NM_0012563 CHST9  | 1 |
| hsa-miR-487a NM_0012563 CHST9  | 1 |
| hsa-miR-487a NM_0012563 CHST9  | 1 |
| hsa-miR-488-: NM_0012563 CHST9 | 1 |
| hsa-miR-489-: NM_0012563 CHST9 | 1 |
| hsa-miR-489-: NM_0012563 CHST9 | 1 |
| hsa-miR-490-: NM_0012563 CHST9 | 1 |
| hsa-miR-490-: NM_0012563 CHST9 | 1 |
| hsa-miR-491-: NM_0012563 CHST9 | 1 |
| hsa-miR-511-: NM_0012563 CHST9 | 1 |
| hsa-miR-492 NM_0012563 CHST9   | 1 |
| hsa-miR-493-: NM_0012563 CHST9 | 1 |
| hsa-miR-193t NM_0012563 CHST9  | 1 |
| hsa-miR-193t NM_0012563 CHST9  | 1 |
| hsa-miR-498-: NM_0012563 CHST9 | 1 |
| hsa-miR-498-: NM_0012563 CHST9 | 1 |
| hsa-miR-498-: NM_0012563 CHST9 | 1 |
| hsa-miR-520e NM_0012563 CHST9  | 1 |
| hsa-miR-520f NM_0012563 CHST9  | 1 |
| hsa-miR-520a NM_0012563 CHST9  | 1 |
| hsa-miR-526t NM_0012563 CHST9  | 1 |
| hsa-miR-525-: NM_0012563 CHST9 | 1 |
| hsa-miR-525-: NM_0012563 CHST9 | 1 |
| hsa-miR-523-: NM_0012563 CHST9 | 1 |
| hsa-miR-520c NM_0012563 CHST9  | 1 |
| hsa-miR-520c NM_0012563 CHST9  | 1 |
| hsa-miR-518c NM_0012563 CHST9  | 1 |
| hsa-miR-517-: NM_0012563 CHST9 | 1 |
| hsa-miR-519d NM_0012563 CHST9  | 1 |
| hsa-miR-520d NM_0012563 CHST9  | 1 |
| hsa-miR-520g NM_0012563 CHST9  | 1 |
| hsa-miR-520g NM_0012563 CHST9  | 1 |
| hsa-miR-516t NM_0012563 CHST9  | 1 |
| hsa-miR-518a NM_0012563 CHST9  | 1 |
| hsa-miR-520h NM_0012563 CHST9  | 1 |
| hsa-miR-500a NM_0012563 CHST9  | 1 |
| hsa-miR-500a NM_0012563 CHST9  | 1 |
| hsa-miR-502-: NM_0012563 CHST9 | 1 |
| hsa-miR-502-: NM_0012563 CHST9 | 1 |
| hsa-miR-450a NM_0012563 CHST9  | 1 |
| hsa-miR-503-: NM_0012563 CHST9 | 1 |
| hsa-miR-505-: NM_0012563 CHST9 | 1 |
| hsa-miR-513a NM_0012563 CHST9  | 1 |
| hsa-miR-513a NM_0012563 CHST9  | 1 |
| hsa-miR-513a NM_0012563 CHST9  | 1 |
| hsa-miR-508-: NM_0012563 CHST9 | 1 |
| hsa-miR-508-: NM_0012563 CHST9 | 1 |
| hsa-miR-509-: NM_0012563 CHST9 | 1 |
| hsa-miR-510-: NM_0012563 CHST9 | 1 |

|              |            |       |   |
|--------------|------------|-------|---|
| hsa-miR-510- | NM_0012563 | CHST9 | 1 |
| hsa-miR-532- | NM_0012563 | CHST9 | 1 |
| hsa-miR-532- | NM_0012563 | CHST9 | 1 |
| hsa-miR-455- | NM_0012563 | CHST9 | 1 |
| hsa-miR-554  | NM_0012563 | CHST9 | 1 |
| hsa-miR-92b- | NM_0012563 | CHST9 | 1 |
| hsa-miR-555  | NM_0012563 | CHST9 | 1 |
| hsa-miR-555  | NM_0012563 | CHST9 | 1 |
| hsa-miR-556- | NM_0012563 | CHST9 | 1 |
| hsa-miR-557  | NM_0012563 | CHST9 | 1 |
| hsa-miR-576- | NM_0012563 | CHST9 | 1 |
| hsa-miR-584- | NM_0012563 | CHST9 | 1 |
| hsa-miR-548t | NM_0012563 | CHST9 | 1 |
| hsa-miR-588  | NM_0012563 | CHST9 | 1 |
| hsa-miR-589- | NM_0012563 | CHST9 | 1 |
| hsa-miR-589- | NM_0012563 | CHST9 | 1 |
| hsa-miR-589- | NM_0012563 | CHST9 | 1 |
| hsa-miR-550a | NM_0012563 | CHST9 | 1 |
| hsa-miR-593- | NM_0012563 | CHST9 | 1 |
| hsa-miR-596  | NM_0012563 | CHST9 | 1 |
| hsa-miR-597- | NM_0012563 | CHST9 | 1 |
| hsa-miR-601  | NM_0012563 | CHST9 | 1 |
| hsa-miR-602  | NM_0012563 | CHST9 | 1 |
| hsa-miR-604  | NM_0012563 | CHST9 | 1 |
| hsa-miR-604  | NM_0012563 | CHST9 | 1 |
| hsa-miR-612  | NM_0012563 | CHST9 | 1 |
| hsa-miR-612  | NM_0012563 | CHST9 | 1 |
| hsa-miR-615- | NM_0012563 | CHST9 | 1 |
| hsa-miR-615- | NM_0012563 | CHST9 | 1 |
| hsa-miR-619- | NM_0012563 | CHST9 | 1 |
| hsa-miR-623  | NM_0012563 | CHST9 | 1 |
| hsa-miR-624- | NM_0012563 | CHST9 | 1 |
| hsa-miR-629- | NM_0012563 | CHST9 | 1 |
| hsa-miR-33b- | NM_0012563 | CHST9 | 1 |
| hsa-miR-638  | NM_0012563 | CHST9 | 1 |
| hsa-miR-642a | NM_0012563 | CHST9 | 1 |
| hsa-miR-644a | NM_0012563 | CHST9 | 1 |
| hsa-miR-648  | NM_0012563 | CHST9 | 1 |
| hsa-miR-651- | NM_0012563 | CHST9 | 1 |
| hsa-miR-662  | NM_0012563 | CHST9 | 1 |
| hsa-miR-449t | NM_0012563 | CHST9 | 1 |
| hsa-miR-653- | NM_0012563 | CHST9 | 1 |
| hsa-miR-654- | NM_0012563 | CHST9 | 1 |
| hsa-miR-654- | NM_0012563 | CHST9 | 1 |
| hsa-miR-656- | NM_0012563 | CHST9 | 1 |
| hsa-miR-549a | NM_0012563 | CHST9 | 1 |
| hsa-miR-658  | NM_0012563 | CHST9 | 1 |
| hsa-miR-660- | NM_0012563 | CHST9 | 1 |
| hsa-miR-542- | NM_0012563 | CHST9 | 1 |
| hsa-miR-758- | NM_0012563 | CHST9 | 1 |
| hsa-miR-758- | NM_0012563 | CHST9 | 1 |
| hsa-miR-668- | NM_0012563 | CHST9 | 1 |
| hsa-miR-767- | NM_0012563 | CHST9 | 1 |
| hsa-miR-1224 | NM_0012563 | CHST9 | 1 |
| hsa-miR-1224 | NM_0012563 | CHST9 | 1 |
| hsa-miR-1224 | NM_0012563 | CHST9 | 1 |
| hsa-miR-151t | NM_0012563 | CHST9 | 1 |
| hsa-miR-320t | NM_0012563 | CHST9 | 1 |
| hsa-miR-1468 | NM_0012563 | CHST9 | 1 |
| hsa-miR-1468 | NM_0012563 | CHST9 | 1 |
| hsa-miR-1271 | NM_0012563 | CHST9 | 1 |
| hsa-miR-1301 | NM_0012563 | CHST9 | 1 |
| hsa-miR-1301 | NM_0012563 | CHST9 | 1 |
| hsa-miR-1185 | NM_0012563 | CHST9 | 1 |
| hsa-miR-449c | NM_0012563 | CHST9 | 1 |
| hsa-miR-449c | NM_0012563 | CHST9 | 1 |
| hsa-miR-769- | NM_0012563 | CHST9 | 1 |
| hsa-miR-769- | NM_0012563 | CHST9 | 1 |
| hsa-miR-1185 | NM_0012563 | CHST9 | 1 |
| hsa-miR-1298 | NM_0012563 | CHST9 | 1 |
| hsa-miR-2113 | NM_0012563 | CHST9 | 1 |
| hsa-miR-675- | NM_0012563 | CHST9 | 1 |
| hsa-miR-675- | NM_0012563 | CHST9 | 1 |
| hsa-miR-298  | NM_0012563 | CHST9 | 1 |
| hsa-miR-891a | NM_0012563 | CHST9 | 1 |
| hsa-miR-450t | NM_0012563 | CHST9 | 1 |
| hsa-miR-450t | NM_0012563 | CHST9 | 1 |
| hsa-miR-891t | NM_0012563 | CHST9 | 1 |
| hsa-miR-888- | NM_0012563 | CHST9 | 1 |
| hsa-miR-888- | NM_0012563 | CHST9 | 1 |
| hsa-miR-888- | NM_0012563 | CHST9 | 1 |
| hsa-miR-541- | NM_0012563 | CHST9 | 1 |
| hsa-miR-541- | NM_0012563 | CHST9 | 1 |
| hsa-miR-541- | NM_0012563 | CHST9 | 1 |
| hsa-miR-889- | NM_0012563 | CHST9 | 1 |
| hsa-miR-708- | NM_0012563 | CHST9 | 1 |
| hsa-miR-885- | NM_0012563 | CHST9 | 1 |
| hsa-miR-877- | NM_0012563 | CHST9 | 1 |
| hsa-miR-877- | NM_0012563 | CHST9 | 1 |
| hsa-miR-665  | NM_0012563 | CHST9 | 1 |
| hsa-miR-301t | NM_0012563 | CHST9 | 1 |
| hsa-miR-301t | NM_0012563 | CHST9 | 1 |
| hsa-miR-920  | NM_0012563 | CHST9 | 1 |
| hsa-miR-936  | NM_0012563 | CHST9 | 1 |





















|               |           |       |   |
|---------------|-----------|-------|---|
| hsa-let-7b-5p | NM_031422 | CHST9 | 1 |
| hsa-let-7b-5p | NM_031422 | CHST9 | 1 |
| hsa-let-7c-5p | NM_031422 | CHST9 | 1 |
| hsa-let-7d-5p | NM_031422 | CHST9 | 1 |
| hsa-let-7e-5p | NM_031422 | CHST9 | 1 |
| hsa-let-7e-5p | NM_031422 | CHST9 | 1 |
| hsa-let-7f-5p | NM_031422 | CHST9 | 1 |
| hsa-miR-15a-  | NM_031422 | CHST9 | 1 |
| hsa-miR-17-5j | NM_031422 | CHST9 | 1 |
| hsa-miR-20a-  | NM_031422 | CHST9 | 1 |
| hsa-miR-24-1  | NM_031422 | CHST9 | 1 |
| hsa-miR-24-2  | NM_031422 | CHST9 | 1 |
| hsa-miR-26a-  | NM_031422 | CHST9 | 1 |
| hsa-miR-27a-  | NM_031422 | CHST9 | 1 |
| hsa-miR-28-5j | NM_031422 | CHST9 | 1 |
| hsa-miR-30a-  | NM_031422 | CHST9 | 1 |
| hsa-miR-31-5j | NM_031422 | CHST9 | 1 |
| hsa-miR-31-3j | NM_031422 | CHST9 | 1 |
| hsa-miR-92a-  | NM_031422 | CHST9 | 1 |
| hsa-miR-93-5j | NM_031422 | CHST9 | 1 |
| hsa-miR-29b-  | NM_031422 | CHST9 | 1 |
| hsa-miR-29b-  | NM_031422 | CHST9 | 1 |
| hsa-miR-106a  | NM_031422 | CHST9 | 1 |
| hsa-miR-106a  | NM_031422 | CHST9 | 1 |
| hsa-miR-197-  | NM_031422 | CHST9 | 1 |
| hsa-miR-197-  | NM_031422 | CHST9 | 1 |
| hsa-miR-197-  | NM_031422 | CHST9 | 1 |
| hsa-miR-199a  | NM_031422 | CHST9 | 1 |
| hsa-miR-199a  | NM_031422 | CHST9 | 1 |
| hsa-miR-208a  | NM_031422 | CHST9 | 1 |
| hsa-miR-30c-  | NM_031422 | CHST9 | 1 |
| hsa-miR-30c-  | NM_031422 | CHST9 | 1 |
| hsa-miR-7-5p  | NM_031422 | CHST9 | 1 |
| hsa-miR-10a-  | NM_031422 | CHST9 | 1 |
| hsa-miR-34a-  | NM_031422 | CHST9 | 1 |
| hsa-miR-181a  | NM_031422 | CHST9 | 1 |
| hsa-miR-181b  | NM_031422 | CHST9 | 1 |
| hsa-miR-181c  | NM_031422 | CHST9 | 1 |
| hsa-miR-183-  | NM_031422 | CHST9 | 1 |
| hsa-miR-187-  | NM_031422 | CHST9 | 1 |
| hsa-miR-187-  | NM_031422 | CHST9 | 1 |
| hsa-miR-199t  | NM_031422 | CHST9 | 1 |
| hsa-miR-199t  | NM_031422 | CHST9 | 1 |
| hsa-miR-204-  | NM_031422 | CHST9 | 1 |
| hsa-miR-205-  | NM_031422 | CHST9 | 1 |
| hsa-miR-214-  | NM_031422 | CHST9 | 1 |
| hsa-miR-216a  | NM_031422 | CHST9 | 1 |
| hsa-miR-217-  | NM_031422 | CHST9 | 1 |
| hsa-miR-219a  | NM_031422 | CHST9 | 1 |
| hsa-miR-221-  | NM_031422 | CHST9 | 1 |
| hsa-let-7g-5p | NM_031422 | CHST9 | 1 |
| hsa-let-7i-5p | NM_031422 | CHST9 | 1 |
| hsa-let-7i-3p | NM_031422 | CHST9 | 1 |
| hsa-miR-27b-  | NM_031422 | CHST9 | 1 |
| hsa-miR-30b-  | NM_031422 | CHST9 | 1 |
| hsa-miR-124-  | NM_031422 | CHST9 | 1 |
| hsa-miR-124-  | NM_031422 | CHST9 | 1 |
| hsa-miR-135a  | NM_031422 | CHST9 | 1 |
| hsa-miR-135a  | NM_031422 | CHST9 | 1 |
| hsa-miR-138-  | NM_031422 | CHST9 | 1 |
| hsa-miR-140-  | NM_031422 | CHST9 | 1 |
| hsa-miR-145-  | NM_031422 | CHST9 | 1 |
| hsa-miR-145-  | NM_031422 | CHST9 | 1 |
| hsa-miR-125a  | NM_031422 | CHST9 | 1 |
| hsa-miR-125t  | NM_031422 | CHST9 | 1 |
| hsa-miR-125t  | NM_031422 | CHST9 | 1 |
| hsa-miR-127-  | NM_031422 | CHST9 | 1 |
| hsa-miR-134-  | NM_031422 | CHST9 | 1 |
| hsa-miR-134-  | NM_031422 | CHST9 | 1 |
| hsa-miR-134-  | NM_031422 | CHST9 | 1 |
| hsa-miR-138-  | NM_031422 | CHST9 | 1 |
| hsa-miR-149-  | NM_031422 | CHST9 | 1 |
| hsa-miR-149-  | NM_031422 | CHST9 | 1 |
| hsa-miR-150-  | NM_031422 | CHST9 | 1 |
| hsa-miR-150-  | NM_031422 | CHST9 | 1 |
| hsa-miR-184   | NM_031422 | CHST9 | 1 |
| hsa-miR-185-  | NM_031422 | CHST9 | 1 |
| hsa-miR-185-  | NM_031422 | CHST9 | 1 |
| hsa-miR-188-  | NM_031422 | CHST9 | 1 |
| hsa-miR-188-  | NM_031422 | CHST9 | 1 |
| hsa-miR-188-  | NM_031422 | CHST9 | 1 |
| hsa-miR-193a  | NM_031422 | CHST9 | 1 |
| hsa-miR-320a  | NM_031422 | CHST9 | 1 |
| hsa-miR-320a  | NM_031422 | CHST9 | 1 |
| hsa-miR-194-  | NM_031422 | CHST9 | 1 |
| hsa-miR-106t  | NM_031422 | CHST9 | 1 |
| hsa-miR-30c-  | NM_031422 | CHST9 | 1 |
| hsa-miR-219a  | NM_031422 | CHST9 | 1 |
| hsa-miR-34b-  | NM_031422 | CHST9 | 1 |
| hsa-miR-299-  | NM_031422 | CHST9 | 1 |
| hsa-miR-99b-  | NM_031422 | CHST9 | 1 |
| hsa-miR-99b-  | NM_031422 | CHST9 | 1 |
| hsa-miR-296-  | NM_031422 | CHST9 | 1 |
| hsa-miR-130t  | NM_031422 | CHST9 | 1 |

|              |           |       |   |
|--------------|-----------|-------|---|
| hsa-miR-130t | NM_031422 | CHST9 | 1 |
| hsa-miR-30e- | NM_031422 | CHST9 | 1 |
| hsa-miR-361- | NM_031422 | CHST9 | 1 |
| hsa-miR-363- | NM_031422 | CHST9 | 1 |
| hsa-miR-302b | NM_031422 | CHST9 | 1 |
| hsa-miR-375- | NM_031422 | CHST9 | 1 |
| hsa-miR-377- | NM_031422 | CHST9 | 1 |
| hsa-miR-378a | NM_031422 | CHST9 | 1 |
| hsa-miR-381- | NM_031422 | CHST9 | 1 |
| hsa-miR-381- | NM_031422 | CHST9 | 1 |
| hsa-miR-383- | NM_031422 | CHST9 | 1 |
| hsa-miR-328- | NM_031422 | CHST9 | 1 |
| hsa-miR-342- | NM_031422 | CHST9 | 1 |
| hsa-miR-337- | NM_031422 | CHST9 | 1 |
| hsa-miR-323a | NM_031422 | CHST9 | 1 |
| hsa-miR-323a | NM_031422 | CHST9 | 1 |
| hsa-miR-151a | NM_031422 | CHST9 | 1 |
| hsa-miR-151a | NM_031422 | CHST9 | 1 |
| hsa-miR-135b | NM_031422 | CHST9 | 1 |
| hsa-miR-331- | NM_031422 | CHST9 | 1 |
| hsa-miR-339- | NM_031422 | CHST9 | 1 |
| hsa-miR-325  | NM_031422 | CHST9 | 1 |
| hsa-miR-345- | NM_031422 | CHST9 | 1 |
| hsa-miR-346  | NM_031422 | CHST9 | 1 |
| hsa-miR-346  | NM_031422 | CHST9 | 1 |
| hsa-miR-422a | NM_031422 | CHST9 | 1 |
| hsa-miR-423- | NM_031422 | CHST9 | 1 |
| hsa-miR-425- | NM_031422 | CHST9 | 1 |
| hsa-miR-449a | NM_031422 | CHST9 | 1 |
| hsa-miR-433- | NM_031422 | CHST9 | 1 |
| hsa-miR-329- | NM_031422 | CHST9 | 1 |
| hsa-miR-329- | NM_031422 | CHST9 | 1 |
| hsa-miR-412- | NM_031422 | CHST9 | 1 |
| hsa-miR-410- | NM_031422 | CHST9 | 1 |
| hsa-miR-483- | NM_031422 | CHST9 | 1 |
| hsa-miR-483- | NM_031422 | CHST9 | 1 |
| hsa-miR-483- | NM_031422 | CHST9 | 1 |
| hsa-miR-485- | NM_031422 | CHST9 | 1 |
| hsa-miR-486- | NM_031422 | CHST9 | 1 |
| hsa-miR-487a | NM_031422 | CHST9 | 1 |
| hsa-miR-487a | NM_031422 | CHST9 | 1 |
| hsa-miR-487a | NM_031422 | CHST9 | 1 |
| hsa-miR-487a | NM_031422 | CHST9 | 1 |
| hsa-miR-488- | NM_031422 | CHST9 | 1 |
| hsa-miR-489- | NM_031422 | CHST9 | 1 |
| hsa-miR-489- | NM_031422 | CHST9 | 1 |
| hsa-miR-489- | NM_031422 | CHST9 | 1 |
| hsa-miR-511- | NM_031422 | CHST9 | 1 |
| hsa-miR-493- | NM_031422 | CHST9 | 1 |
| hsa-miR-432- | NM_031422 | CHST9 | 1 |
| hsa-miR-193b | NM_031422 | CHST9 | 1 |
| hsa-miR-193b | NM_031422 | CHST9 | 1 |
| hsa-miR-498- | NM_031422 | CHST9 | 1 |
| hsa-miR-498- | NM_031422 | CHST9 | 1 |
| hsa-miR-520e | NM_031422 | CHST9 | 1 |
| hsa-miR-520e | NM_031422 | CHST9 | 1 |
| hsa-miR-525- | NM_031422 | CHST9 | 1 |
| hsa-miR-525- | NM_031422 | CHST9 | 1 |
| hsa-miR-523- | NM_031422 | CHST9 | 1 |
| hsa-miR-520c | NM_031422 | CHST9 | 1 |
| hsa-miR-520c | NM_031422 | CHST9 | 1 |
| hsa-miR-517- | NM_031422 | CHST9 | 1 |
| hsa-miR-519d | NM_031422 | CHST9 | 1 |
| hsa-miR-520g | NM_031422 | CHST9 | 1 |
| hsa-miR-518a | NM_031422 | CHST9 | 1 |
| hsa-miR-520h | NM_031422 | CHST9 | 1 |
| hsa-miR-500a | NM_031422 | CHST9 | 1 |
| hsa-miR-501- | NM_031422 | CHST9 | 1 |
| hsa-miR-502- | NM_031422 | CHST9 | 1 |
| hsa-miR-502- | NM_031422 | CHST9 | 1 |
| hsa-miR-450a | NM_031422 | CHST9 | 1 |
| hsa-miR-503- | NM_031422 | CHST9 | 1 |
| hsa-miR-505- | NM_031422 | CHST9 | 1 |
| hsa-miR-513a | NM_031422 | CHST9 | 1 |
| hsa-miR-513a | NM_031422 | CHST9 | 1 |
| hsa-miR-513a | NM_031422 | CHST9 | 1 |
| hsa-miR-508- | NM_031422 | CHST9 | 1 |
| hsa-miR-509- | NM_031422 | CHST9 | 1 |
| hsa-miR-510- | NM_031422 | CHST9 | 1 |
| hsa-miR-510- | NM_031422 | CHST9 | 1 |
| hsa-miR-514a | NM_031422 | CHST9 | 1 |
| hsa-miR-532- | NM_031422 | CHST9 | 1 |
| hsa-miR-455- | NM_031422 | CHST9 | 1 |
| hsa-miR-455- | NM_031422 | CHST9 | 1 |
| hsa-miR-487b | NM_031422 | CHST9 | 1 |
| hsa-miR-552- | NM_031422 | CHST9 | 1 |
| hsa-miR-552- | NM_031422 | CHST9 | 1 |
| hsa-miR-554  | NM_031422 | CHST9 | 1 |
| hsa-miR-92b- | NM_031422 | CHST9 | 1 |
| hsa-miR-555  | NM_031422 | CHST9 | 1 |
| hsa-miR-557  | NM_031422 | CHST9 | 1 |
| hsa-miR-576- | NM_031422 | CHST9 | 1 |
| hsa-miR-584- | NM_031422 | CHST9 | 1 |
| hsa-miR-548b | NM_031422 | CHST9 | 1 |
| hsa-miR-589- | NM_031422 | CHST9 | 1 |

|              |           |       |   |
|--------------|-----------|-------|---|
| hsa-miR-589- | NM_031422 | CHST9 | 1 |
| hsa-miR-550a | NM_031422 | CHST9 | 1 |
| hsa-miR-593- | NM_031422 | CHST9 | 1 |
| hsa-miR-596  | NM_031422 | CHST9 | 1 |
| hsa-miR-597- | NM_031422 | CHST9 | 1 |
| hsa-miR-601  | NM_031422 | CHST9 | 1 |
| hsa-miR-601  | NM_031422 | CHST9 | 1 |
| hsa-miR-602  | NM_031422 | CHST9 | 1 |
| hsa-miR-604  | NM_031422 | CHST9 | 1 |
| hsa-miR-604  | NM_031422 | CHST9 | 1 |
| hsa-miR-612  | NM_031422 | CHST9 | 1 |
| hsa-miR-612  | NM_031422 | CHST9 | 1 |
| hsa-miR-615- | NM_031422 | CHST9 | 1 |
| hsa-miR-618  | NM_031422 | CHST9 | 1 |
| hsa-miR-624- | NM_031422 | CHST9 | 1 |
| hsa-miR-628- | NM_031422 | CHST9 | 1 |
| hsa-miR-629- | NM_031422 | CHST9 | 1 |
| hsa-miR-33b- | NM_031422 | CHST9 | 1 |
| hsa-miR-632  | NM_031422 | CHST9 | 1 |
| hsa-miR-646  | NM_031422 | CHST9 | 1 |
| hsa-miR-648  | NM_031422 | CHST9 | 1 |
| hsa-miR-652- | NM_031422 | CHST9 | 1 |
| hsa-miR-662  | NM_031422 | CHST9 | 1 |
| hsa-miR-449t | NM_031422 | CHST9 | 1 |
| hsa-miR-449t | NM_031422 | CHST9 | 1 |
| hsa-miR-653- | NM_031422 | CHST9 | 1 |
| hsa-miR-656- | NM_031422 | CHST9 | 1 |
| hsa-miR-549a | NM_031422 | CHST9 | 1 |
| hsa-miR-658  | NM_031422 | CHST9 | 1 |
| hsa-miR-421  | NM_031422 | CHST9 | 1 |
| hsa-miR-542- | NM_031422 | CHST9 | 1 |
| hsa-miR-758- | NM_031422 | CHST9 | 1 |
| hsa-miR-758- | NM_031422 | CHST9 | 1 |
| hsa-miR-668- | NM_031422 | CHST9 | 1 |
| hsa-miR-550a | NM_031422 | CHST9 | 1 |
| hsa-miR-767- | NM_031422 | CHST9 | 1 |
| hsa-miR-767- | NM_031422 | CHST9 | 1 |
| hsa-miR-1224 | NM_031422 | CHST9 | 1 |
| hsa-miR-1224 | NM_031422 | CHST9 | 1 |
| hsa-miR-1224 | NM_031422 | CHST9 | 1 |
| hsa-miR-1224 | NM_031422 | CHST9 | 1 |
| hsa-miR-151t | NM_031422 | CHST9 | 1 |
| hsa-miR-320t | NM_031422 | CHST9 | 1 |
| hsa-miR-1468 | NM_031422 | CHST9 | 1 |
| hsa-miR-1301 | NM_031422 | CHST9 | 1 |
| hsa-miR-1185 | NM_031422 | CHST9 | 1 |
| hsa-miR-449c | NM_031422 | CHST9 | 1 |
| hsa-miR-449c | NM_031422 | CHST9 | 1 |
| hsa-miR-769- | NM_031422 | CHST9 | 1 |
| hsa-miR-769- | NM_031422 | CHST9 | 1 |
| hsa-miR-1185 | NM_031422 | CHST9 | 1 |
| hsa-miR-670- | NM_031422 | CHST9 | 1 |
| hsa-miR-670- | NM_031422 | CHST9 | 1 |
| hsa-miR-1298 | NM_031422 | CHST9 | 1 |
| hsa-miR-2113 | NM_031422 | CHST9 | 1 |
| hsa-miR-675- | NM_031422 | CHST9 | 1 |
| hsa-miR-675- | NM_031422 | CHST9 | 1 |
| hsa-miR-298  | NM_031422 | CHST9 | 1 |
| hsa-miR-891a | NM_031422 | CHST9 | 1 |
| hsa-miR-450t | NM_031422 | CHST9 | 1 |
| hsa-miR-891t | NM_031422 | CHST9 | 1 |
| hsa-miR-888- | NM_031422 | CHST9 | 1 |
| hsa-miR-541- | NM_031422 | CHST9 | 1 |
| hsa-miR-541- | NM_031422 | CHST9 | 1 |
| hsa-miR-541- | NM_031422 | CHST9 | 1 |
| hsa-miR-889- | NM_031422 | CHST9 | 1 |
| hsa-miR-885- | NM_031422 | CHST9 | 1 |
| hsa-miR-877- | NM_031422 | CHST9 | 1 |
| hsa-miR-877- | NM_031422 | CHST9 | 1 |
| hsa-miR-873- | NM_031422 | CHST9 | 1 |
| hsa-miR-301t | NM_031422 | CHST9 | 1 |
| hsa-miR-920  | NM_031422 | CHST9 | 1 |
| hsa-miR-936  | NM_031422 | CHST9 | 1 |
| hsa-miR-937- | NM_031422 | CHST9 | 1 |
| hsa-miR-937- | NM_031422 | CHST9 | 1 |
| hsa-miR-937- | NM_031422 | CHST9 | 1 |
| hsa-miR-939- | NM_031422 | CHST9 | 1 |
| hsa-miR-943  | NM_031422 | CHST9 | 1 |
| hsa-miR-1180 | NM_031422 | CHST9 | 1 |
| hsa-miR-1225 | NM_031422 | CHST9 | 1 |
| hsa-miR-1225 | NM_031422 | CHST9 | 1 |
| hsa-miR-1228 | NM_031422 | CHST9 | 1 |
| hsa-miR-1228 | NM_031422 | CHST9 | 1 |
| hsa-miR-1225 | NM_031422 | CHST9 | 1 |
| hsa-miR-1234 | NM_031422 | CHST9 | 1 |
| hsa-miR-1236 | NM_031422 | CHST9 | 1 |
| hsa-miR-1237 | NM_031422 | CHST9 | 1 |
| hsa-miR-1237 | NM_031422 | CHST9 | 1 |
| hsa-miR-1238 | NM_031422 | CHST9 | 1 |
| hsa-miR-663t | NM_031422 | CHST9 | 1 |
| hsa-miR-1204 | NM_031422 | CHST9 | 1 |
| hsa-miR-1208 | NM_031422 | CHST9 | 1 |
| hsa-miR-1285 | NM_031422 | CHST9 | 1 |
| hsa-miR-1285 | NM_031422 | CHST9 | 1 |

|                        |       |   |
|------------------------|-------|---|
| hsa-miR-1293 NM_031422 | CHST9 | 1 |
| hsa-miR-1303 NM_031422 | CHST9 | 1 |
| hsa-miR-1304 NM_031422 | CHST9 | 1 |
| hsa-miR-1245 NM_031422 | CHST9 | 1 |
| hsa-miR-1247 NM_031422 | CHST9 | 1 |
| hsa-miR-1247 NM_031422 | CHST9 | 1 |
| hsa-miR-1245 NM_031422 | CHST9 | 1 |
| hsa-miR-1249 NM_031422 | CHST9 | 1 |
| hsa-miR-1251 NM_031422 | CHST9 | 1 |
| hsa-miR-1257 NM_031422 | CHST9 | 1 |
| hsa-miR-1263 NM_031422 | CHST9 | 1 |
| hsa-miR-548n NM_031422 | CHST9 | 1 |
| hsa-miR-1268 NM_031422 | CHST9 | 1 |
| hsa-miR-1270 NM_031422 | CHST9 | 1 |
| hsa-miR-1272 NM_031422 | CHST9 | 1 |
| hsa-miR-1275 NM_031422 | CHST9 | 1 |
| hsa-miR-1275 NM_031422 | CHST9 | 1 |
| hsa-miR-1276 NM_031422 | CHST9 | 1 |
| hsa-miR-1288 NM_031422 | CHST9 | 1 |
| hsa-miR-1292 NM_031422 | CHST9 | 1 |
| hsa-miR-1255 NM_031422 | CHST9 | 1 |
| hsa-miR-1255 NM_031422 | CHST9 | 1 |
| hsa-miR-664a NM_031422 | CHST9 | 1 |
| hsa-miR-664a NM_031422 | CHST9 | 1 |
| hsa-miR-513b NM_031422 | CHST9 | 1 |
| hsa-miR-513c NM_031422 | CHST9 | 1 |
| hsa-miR-1322 NM_031422 | CHST9 | 1 |
| hsa-miR-1197 NM_031422 | CHST9 | 1 |
| hsa-miR-320d NM_031422 | CHST9 | 1 |
| hsa-miR-1825 NM_031422 | CHST9 | 1 |
| hsa-miR-1905 NM_031422 | CHST9 | 1 |
| hsa-miR-1910 NM_031422 | CHST9 | 1 |
| hsa-miR-1911 NM_031422 | CHST9 | 1 |
| hsa-miR-1912 NM_031422 | CHST9 | 1 |
| hsa-miR-1912 NM_031422 | CHST9 | 1 |
| hsa-miR-1913 NM_031422 | CHST9 | 1 |
| hsa-miR-1913 NM_031422 | CHST9 | 1 |
| hsa-miR-1915 NM_031422 | CHST9 | 1 |
| hsa-miR-1976 NM_031422 | CHST9 | 1 |
| hsa-miR-2110 NM_031422 | CHST9 | 1 |
| hsa-miR-2110 NM_031422 | CHST9 | 1 |
| hsa-miR-2114 NM_031422 | CHST9 | 1 |
| hsa-miR-2116 NM_031422 | CHST9 | 1 |
| hsa-miR-2116 NM_031422 | CHST9 | 1 |
| hsa-miR-2276 NM_031422 | CHST9 | 1 |
| hsa-miR-2276 NM_031422 | CHST9 | 1 |
| hsa-miR-2277 NM_031422 | CHST9 | 1 |
| hsa-miR-2277 NM_031422 | CHST9 | 1 |
| hsa-miR-2682 NM_031422 | CHST9 | 1 |
| hsa-miR-2682 NM_031422 | CHST9 | 1 |
| hsa-miR-2905 NM_031422 | CHST9 | 1 |
| hsa-miR-3116 NM_031422 | CHST9 | 1 |
| hsa-miR-3121 NM_031422 | CHST9 | 1 |
| hsa-miR-3122 NM_031422 | CHST9 | 1 |
| hsa-miR-3125 NM_031422 | CHST9 | 1 |
| hsa-miR-3126 NM_031422 | CHST9 | 1 |
| hsa-miR-3129 NM_031422 | CHST9 | 1 |
| hsa-miR-3129 NM_031422 | CHST9 | 1 |
| hsa-miR-3131 NM_031422 | CHST9 | 1 |
| hsa-miR-3131 NM_031422 | CHST9 | 1 |
| hsa-miR-3131 NM_031422 | CHST9 | 1 |
| hsa-miR-378t NM_031422 | CHST9 | 1 |
| hsa-miR-378t NM_031422 | CHST9 | 1 |
| hsa-miR-3135 NM_031422 | CHST9 | 1 |
| hsa-miR-3137 NM_031422 | CHST9 | 1 |
| hsa-miR-3140 NM_031422 | CHST9 | 1 |
| hsa-miR-548t NM_031422 | CHST9 | 1 |
| hsa-miR-1273 NM_031422 | CHST9 | 1 |
| hsa-miR-3146 NM_031422 | CHST9 | 1 |
| hsa-miR-3147 NM_031422 | CHST9 | 1 |
| hsa-miR-3151 NM_031422 | CHST9 | 1 |
| hsa-miR-3152 NM_031422 | CHST9 | 1 |
| hsa-miR-3074 NM_031422 | CHST9 | 1 |
| hsa-miR-3074 NM_031422 | CHST9 | 1 |
| hsa-miR-3154 NM_031422 | CHST9 | 1 |
| hsa-miR-3154 NM_031422 | CHST9 | 1 |
| hsa-miR-3156 NM_031422 | CHST9 | 1 |
| hsa-miR-3157 NM_031422 | CHST9 | 1 |
| hsa-miR-3158 NM_031422 | CHST9 | 1 |
| hsa-miR-3159 NM_031422 | CHST9 | 1 |
| hsa-miR-3160 NM_031422 | CHST9 | 1 |
| hsa-miR-3160 NM_031422 | CHST9 | 1 |
| hsa-miR-3165 NM_031422 | CHST9 | 1 |
| hsa-miR-3165 NM_031422 | CHST9 | 1 |
| hsa-miR-1260 NM_031422 | CHST9 | 1 |
| hsa-miR-3169 NM_031422 | CHST9 | 1 |
| hsa-miR-3170 NM_031422 | CHST9 | 1 |
| hsa-miR-3173 NM_031422 | CHST9 | 1 |
| hsa-miR-3173 NM_031422 | CHST9 | 1 |
| hsa-miR-323b NM_031422 | CHST9 | 1 |
| hsa-miR-3176 NM_031422 | CHST9 | 1 |
| hsa-miR-3177 NM_031422 | CHST9 | 1 |
| hsa-miR-3177 NM_031422 | CHST9 | 1 |
| hsa-miR-3178 NM_031422 | CHST9 | 1 |
| hsa-miR-3184 NM_031422 | CHST9 | 1 |

















|                          |       |   |
|--------------------------|-------|---|
| hsa-miR-8052 NM_031422   | CHST9 | 1 |
| hsa-miR-8056 NM_031422   | CHST9 | 1 |
| hsa-miR-8058 NM_031422   | CHST9 | 1 |
| hsa-miR-8065 NM_031422   | CHST9 | 1 |
| hsa-miR-8072 NM_031422   | CHST9 | 1 |
| hsa-miR-8074 NM_031422   | CHST9 | 1 |
| hsa-miR-8075 NM_031422   | CHST9 | 1 |
| hsa-miR-8078 NM_031422   | CHST9 | 1 |
| hsa-miR-8080 NM_031422   | CHST9 | 1 |
| hsa-miR-8082 NM_031422   | CHST9 | 1 |
| hsa-miR-8082 NM_031422   | CHST9 | 1 |
| hsa-miR-950C NM_031422   | CHST9 | 1 |
| hsa-miR-9718 NM_031422   | CHST9 | 1 |
| hsa-miR-9902 NM_031422   | CHST9 | 1 |
| hsa-miR-1843 NM_031422   | CHST9 | 1 |
| hsa-miR-9986 NM_031422   | CHST9 | 1 |
| hsa-miR-9986 NM_031422   | CHST9 | 1 |
| hsa-miR-1022 NM_031422   | CHST9 | 1 |
| hsa-miR-1039 NM_031422   | CHST9 | 1 |
| hsa-miR-104C NM_031422   | CHST9 | 1 |
| hsa-miR-104C NM_031422   | CHST9 | 1 |
| hsa-miR-1039 NM_031422   | CHST9 | 1 |
| hsa-miR-1052 NM_031422   | CHST9 | 1 |
| hsa-miR-1052 NM_031422   | CHST9 | 1 |
| hsa-miR-1139 NM_031422   | CHST9 | 1 |
| hsa-miR-1139 NM_031422   | CHST9 | 1 |
| hsa-miR-1140 NM_031422   | CHST9 | 1 |
| hsa-miR-3059 NM_031422   | CHST9 | 1 |
| hsa-miR-3059 NM_031422   | CHST9 | 1 |
| hsa-miR-3085 NM_031422   | CHST9 | 1 |
| hsa-miR-6529 NM_031422   | CHST9 | 1 |
| hsa-miR-1211 NM_031422   | CHST9 | 1 |
| hsa-miR-1212 NM_031422   | CHST9 | 1 |
| hsa-miR-1213 NM_031422   | CHST9 | 1 |
| hsa-let-7d-5p XM_0170260 | CHST9 | 1 |
| hsa-let-7d-3p XM_0170260 | CHST9 | 1 |
| hsa-let-7e-5p XM_0170260 | CHST9 | 1 |
| hsa-let-7e-5p XM_0170260 | CHST9 | 1 |
| hsa-let-7f-5p XM_0170260 | CHST9 | 1 |
| hsa-miR-17-5j XM_0170260 | CHST9 | 1 |
| hsa-miR-18a- XM_0170260  | CHST9 | 1 |
| hsa-miR-23a- XM_0170260  | CHST9 | 1 |
| hsa-miR-24-3j XM_0170260 | CHST9 | 1 |
| hsa-miR-25-5j XM_0170260 | CHST9 | 1 |
| hsa-miR-26a- XM_0170260  | CHST9 | 1 |
| hsa-miR-26a- XM_0170260  | CHST9 | 1 |
| hsa-miR-26b- XM_0170260  | CHST9 | 1 |
| hsa-miR-27a- XM_0170260  | CHST9 | 1 |
| hsa-miR-27a- XM_0170260  | CHST9 | 1 |
| hsa-miR-28-5j XM_0170260 | CHST9 | 1 |
| hsa-miR-29a- XM_0170260  | CHST9 | 1 |
| hsa-miR-31-5j XM_0170260 | CHST9 | 1 |
| hsa-miR-31-3j XM_0170260 | CHST9 | 1 |
| hsa-miR-31-3j XM_0170260 | CHST9 | 1 |
| hsa-miR-32-3j XM_0170260 | CHST9 | 1 |
| hsa-miR-92a- XM_0170260  | CHST9 | 1 |
| hsa-miR-92a- XM_0170260  | CHST9 | 1 |
| hsa-miR-92a- XM_0170260  | CHST9 | 1 |
| hsa-miR-92a- XM_0170260  | CHST9 | 1 |
| hsa-miR-93-5j XM_0170260 | CHST9 | 1 |
| hsa-miR-103a XM_0170260  | CHST9 | 1 |
| hsa-miR-106a XM_0170260  | CHST9 | 1 |
| hsa-miR-107 XM_0170260   | CHST9 | 1 |
| hsa-miR-197- XM_0170260  | CHST9 | 1 |
| hsa-miR-197- XM_0170260  | CHST9 | 1 |
| hsa-miR-197- XM_0170260  | CHST9 | 1 |
| hsa-miR-30c- XM_0170260  | CHST9 | 1 |
| hsa-miR-30c- XM_0170260  | CHST9 | 1 |
| hsa-miR-139- XM_0170260  | CHST9 | 1 |
| hsa-miR-7-5p XM_0170260  | CHST9 | 1 |
| hsa-miR-7-2-3 XM_0170260 | CHST9 | 1 |
| hsa-miR-10b- XM_0170260  | CHST9 | 1 |
| hsa-miR-181a XM_0170260  | CHST9 | 1 |
| hsa-miR-183- XM_0170260  | CHST9 | 1 |
| hsa-miR-199t XM_0170260  | CHST9 | 1 |
| hsa-miR-203a XM_0170260  | CHST9 | 1 |
| hsa-miR-204- XM_0170260  | CHST9 | 1 |
| hsa-miR-205- XM_0170260  | CHST9 | 1 |
| hsa-miR-210- XM_0170260  | CHST9 | 1 |
| hsa-miR-211- XM_0170260  | CHST9 | 1 |
| hsa-miR-211- XM_0170260  | CHST9 | 1 |
| hsa-miR-212- XM_0170260  | CHST9 | 1 |

|                        |            |       |   |
|------------------------|------------|-------|---|
| hsa-miR-215-XM_0170260 | CHST9      | 1     |   |
| hsa-miR-216a           | XM_0170260 | CHST9 | 1 |
| hsa-miR-217-XM_0170260 | CHST9      | 1     |   |
| hsa-miR-219a           | XM_0170260 | CHST9 | 1 |
| hsa-miR-222-XM_0170260 | CHST9      | 1     |   |
| hsa-let-7g-5p          | XM_0170260 | CHST9 | 1 |
| hsa-let-7i-5p          | XM_0170260 | CHST9 | 1 |
| hsa-let-7i-3p          | XM_0170260 | CHST9 | 1 |
| hsa-miR-23b-XM_0170260 | CHST9      | 1     |   |
| hsa-miR-27b-XM_0170260 | CHST9      | 1     |   |
| hsa-miR-30b-XM_0170260 | CHST9      | 1     |   |
| hsa-miR-30b-XM_0170260 | CHST9      | 1     |   |
| hsa-miR-124-XM_0170260 | CHST9      | 1     |   |
| hsa-miR-125t           | XM_0170260 | CHST9 | 1 |
| hsa-miR-125t           | XM_0170260 | CHST9 | 1 |
| hsa-miR-135a           | XM_0170260 | CHST9 | 1 |
| hsa-miR-137-XM_0170260 | CHST9      | 1     |   |
| hsa-miR-138-XM_0170260 | CHST9      | 1     |   |
| hsa-miR-138-XM_0170260 | CHST9      | 1     |   |
| hsa-miR-140-XM_0170260 | CHST9      | 1     |   |
| hsa-miR-142-XM_0170260 | CHST9      | 1     |   |
| hsa-miR-145-XM_0170260 | CHST9      | 1     |   |
| hsa-miR-191-XM_0170260 | CHST9      | 1     |   |
| hsa-miR-125a           | XM_0170260 | CHST9 | 1 |
| hsa-miR-125a           | XM_0170260 | CHST9 | 1 |
| hsa-miR-125a           | XM_0170260 | CHST9 | 1 |
| hsa-miR-125a           | XM_0170260 | CHST9 | 1 |
| hsa-miR-125t           | XM_0170260 | CHST9 | 1 |
| hsa-miR-134-XM_0170260 | CHST9      | 1     |   |
| hsa-miR-138-XM_0170260 | CHST9      | 1     |   |
| hsa-miR-149-XM_0170260 | CHST9      | 1     |   |
| hsa-miR-149-XM_0170260 | CHST9      | 1     |   |
| hsa-miR-150-XM_0170260 | CHST9      | 1     |   |
| hsa-miR-184            | XM_0170260 | CHST9 | 1 |
| hsa-miR-185-XM_0170260 | CHST9      | 1     |   |
| hsa-miR-186-XM_0170260 | CHST9      | 1     |   |
| hsa-miR-188-XM_0170260 | CHST9      | 1     |   |
| hsa-miR-193a           | XM_0170260 | CHST9 | 1 |
| hsa-miR-320a           | XM_0170260 | CHST9 | 1 |
| hsa-miR-30c-XM_0170260 | CHST9      | 1     |   |
| hsa-miR-219a           | XM_0170260 | CHST9 | 1 |
| hsa-miR-219a           | XM_0170260 | CHST9 | 1 |
| hsa-miR-299-XM_0170260 | CHST9      | 1     |   |
| hsa-miR-301a           | XM_0170260 | CHST9 | 1 |
| hsa-miR-99b-XM_0170260 | CHST9      | 1     |   |
| hsa-miR-296-XM_0170260 | CHST9      | 1     |   |
| hsa-miR-30e-XM_0170260 | CHST9      | 1     |   |
| hsa-miR-365a           | XM_0170260 | CHST9 | 1 |
| hsa-miR-376c           | XM_0170260 | CHST9 | 1 |
| hsa-miR-370-XM_0170260 | CHST9      | 1     |   |
| hsa-miR-371a           | XM_0170260 | CHST9 | 1 |
| hsa-miR-377-XM_0170260 | CHST9      | 1     |   |
| hsa-miR-379-XM_0170260 | CHST9      | 1     |   |
| hsa-miR-380-XM_0170260 | CHST9      | 1     |   |
| hsa-miR-381-XM_0170260 | CHST9      | 1     |   |
| hsa-miR-383-XM_0170260 | CHST9      | 1     |   |
| hsa-miR-340-XM_0170260 | CHST9      | 1     |   |
| hsa-miR-330-XM_0170260 | CHST9      | 1     |   |
| hsa-miR-330-XM_0170260 | CHST9      | 1     |   |
| hsa-miR-328-XM_0170260 | CHST9      | 1     |   |
| hsa-miR-328-XM_0170260 | CHST9      | 1     |   |
| hsa-miR-342-XM_0170260 | CHST9      | 1     |   |
| hsa-miR-323a           | XM_0170260 | CHST9 | 1 |
| hsa-miR-323a           | XM_0170260 | CHST9 | 1 |
| hsa-miR-326            | XM_0170260 | CHST9 | 1 |
| hsa-miR-151a           | XM_0170260 | CHST9 | 1 |
| hsa-miR-135t           | XM_0170260 | CHST9 | 1 |
| hsa-miR-331-XM_0170260 | CHST9      | 1     |   |
| hsa-miR-339-XM_0170260 | CHST9      | 1     |   |
| hsa-miR-325            | XM_0170260 | CHST9 | 1 |
| hsa-miR-346            | XM_0170260 | CHST9 | 1 |
| hsa-miR-422a           | XM_0170260 | CHST9 | 1 |
| hsa-miR-423-XM_0170260 | CHST9      | 1     |   |
| hsa-miR-425-XM_0170260 | CHST9      | 1     |   |
| hsa-miR-20b-XM_0170260 | CHST9      | 1     |   |
| hsa-miR-412-XM_0170260 | CHST9      | 1     |   |
| hsa-miR-483-XM_0170260 | CHST9      | 1     |   |
| hsa-miR-483-XM_0170260 | CHST9      | 1     |   |
| hsa-miR-484            | XM_0170260 | CHST9 | 1 |
| hsa-miR-485-XM_0170260 | CHST9      | 1     |   |
| hsa-miR-487a           | XM_0170260 | CHST9 | 1 |
| hsa-miR-487a           | XM_0170260 | CHST9 | 1 |
| hsa-miR-488-XM_0170260 | CHST9      | 1     |   |
| hsa-miR-489-XM_0170260 | CHST9      | 1     |   |
| hsa-miR-490-XM_0170260 | CHST9      | 1     |   |
| hsa-miR-146t           | XM_0170260 | CHST9 | 1 |
| hsa-miR-146t           | XM_0170260 | CHST9 | 1 |
| hsa-miR-492            | XM_0170260 | CHST9 | 1 |
| hsa-miR-493-XM_0170260 | CHST9      | 1     |   |
| hsa-miR-193t           | XM_0170260 | CHST9 | 1 |
| hsa-miR-512-XM_0170260 | CHST9      | 1     |   |
| hsa-miR-519e           | XM_0170260 | CHST9 | 1 |
| hsa-miR-520f           | XM_0170260 | CHST9 | 1 |
| hsa-miR-519c           | XM_0170260 | CHST9 | 1 |



|              |            |       |   |
|--------------|------------|-------|---|
| hsa-miR-519t | XM_0170260 | CHST9 | 1 |
| hsa-miR-523- | XM_0170260 | CHST9 | 1 |
| hsa-miR-520c | XM_0170260 | CHST9 | 1 |
| hsa-miR-518c | XM_0170260 | CHST9 | 1 |
| hsa-miR-518c | XM_0170260 | CHST9 | 1 |
| hsa-miR-517- | XM_0170260 | CHST9 | 1 |
| hsa-miR-516t | XM_0170260 | CHST9 | 1 |
| hsa-miR-516t | XM_0170260 | CHST9 | 1 |
| hsa-miR-518e | XM_0170260 | CHST9 | 1 |
| hsa-miR-518e | XM_0170260 | CHST9 | 1 |
| hsa-miR-518a | XM_0170260 | CHST9 | 1 |
| hsa-miR-518a | XM_0170260 | CHST9 | 1 |
| hsa-miR-522- | XM_0170260 | CHST9 | 1 |
| hsa-miR-519a | XM_0170260 | CHST9 | 1 |
| hsa-miR-516a | XM_0170260 | CHST9 | 1 |
| hsa-miR-500a | XM_0170260 | CHST9 | 1 |
| hsa-miR-500a | XM_0170260 | CHST9 | 1 |
| hsa-miR-502- | XM_0170260 | CHST9 | 1 |
| hsa-miR-502- | XM_0170260 | CHST9 | 1 |
| hsa-miR-503- | XM_0170260 | CHST9 | 1 |
| hsa-miR-504- | XM_0170260 | CHST9 | 1 |
| hsa-miR-504- | XM_0170260 | CHST9 | 1 |
| hsa-miR-504- | XM_0170260 | CHST9 | 1 |
| hsa-miR-504- | XM_0170260 | CHST9 | 1 |
| hsa-miR-505- | XM_0170260 | CHST9 | 1 |
| hsa-miR-513a | XM_0170260 | CHST9 | 1 |
| hsa-miR-513a | XM_0170260 | CHST9 | 1 |
| hsa-miR-508- | XM_0170260 | CHST9 | 1 |
| hsa-miR-509- | XM_0170260 | CHST9 | 1 |
| hsa-miR-532- | XM_0170260 | CHST9 | 1 |
| hsa-miR-532- | XM_0170260 | CHST9 | 1 |
| hsa-miR-532- | XM_0170260 | CHST9 | 1 |
| hsa-miR-455- | XM_0170260 | CHST9 | 1 |
| hsa-miR-552- | XM_0170260 | CHST9 | 1 |
| hsa-miR-552- | XM_0170260 | CHST9 | 1 |
| hsa-miR-92b- | XM_0170260 | CHST9 | 1 |
| hsa-miR-92b- | XM_0170260 | CHST9 | 1 |
| hsa-miR-556- | XM_0170260 | CHST9 | 1 |
| hsa-miR-557  | XM_0170260 | CHST9 | 1 |
| hsa-miR-564  | XM_0170260 | CHST9 | 1 |
| hsa-miR-576- | XM_0170260 | CHST9 | 1 |
| hsa-miR-583  | XM_0170260 | CHST9 | 1 |
| hsa-miR-548t | XM_0170260 | CHST9 | 1 |
| hsa-miR-548t | XM_0170260 | CHST9 | 1 |
| hsa-miR-588  | XM_0170260 | CHST9 | 1 |
| hsa-miR-588  | XM_0170260 | CHST9 | 1 |
| hsa-miR-589- | XM_0170260 | CHST9 | 1 |
| hsa-miR-550a | XM_0170260 | CHST9 | 1 |
| hsa-miR-593- | XM_0170260 | CHST9 | 1 |
| hsa-miR-593- | XM_0170260 | CHST9 | 1 |
| hsa-miR-604  | XM_0170260 | CHST9 | 1 |
| hsa-miR-605- | XM_0170260 | CHST9 | 1 |
| hsa-miR-614  | XM_0170260 | CHST9 | 1 |
| hsa-miR-614  | XM_0170260 | CHST9 | 1 |
| hsa-miR-618  | XM_0170260 | CHST9 | 1 |
| hsa-miR-619- | XM_0170260 | CHST9 | 1 |
| hsa-miR-624- | XM_0170260 | CHST9 | 1 |
| hsa-miR-625- | XM_0170260 | CHST9 | 1 |
| hsa-miR-628- | XM_0170260 | CHST9 | 1 |
| hsa-miR-632  | XM_0170260 | CHST9 | 1 |
| hsa-miR-637  | XM_0170260 | CHST9 | 1 |
| hsa-miR-639  | XM_0170260 | CHST9 | 1 |
| hsa-miR-642a | XM_0170260 | CHST9 | 1 |
| hsa-miR-646  | XM_0170260 | CHST9 | 1 |
| hsa-miR-647  | XM_0170260 | CHST9 | 1 |
| hsa-miR-650  | XM_0170260 | CHST9 | 1 |
| hsa-miR-661  | XM_0170260 | CHST9 | 1 |
| hsa-miR-661  | XM_0170260 | CHST9 | 1 |
| hsa-miR-663a | XM_0170260 | CHST9 | 1 |
| hsa-miR-449t | XM_0170260 | CHST9 | 1 |
| hsa-miR-449t | XM_0170260 | CHST9 | 1 |
| hsa-miR-656- | XM_0170260 | CHST9 | 1 |
| hsa-miR-659- | XM_0170260 | CHST9 | 1 |
| hsa-miR-660- | XM_0170260 | CHST9 | 1 |
| hsa-miR-758- | XM_0170260 | CHST9 | 1 |
| hsa-miR-550a | XM_0170260 | CHST9 | 1 |
| hsa-miR-767- | XM_0170260 | CHST9 | 1 |
| hsa-miR-1224 | XM_0170260 | CHST9 | 1 |
| hsa-miR-320t | XM_0170260 | CHST9 | 1 |
| hsa-miR-1271 | XM_0170260 | CHST9 | 1 |
| hsa-miR-1271 | XM_0170260 | CHST9 | 1 |
| hsa-miR-1301 | XM_0170260 | CHST9 | 1 |
| hsa-miR-1301 | XM_0170260 | CHST9 | 1 |
| hsa-miR-1301 | XM_0170260 | CHST9 | 1 |
| hsa-miR-1185 | XM_0170260 | CHST9 | 1 |
| hsa-miR-766- | XM_0170260 | CHST9 | 1 |
| hsa-miR-1185 | XM_0170260 | CHST9 | 1 |
| hsa-miR-762  | XM_0170260 | CHST9 | 1 |
| hsa-miR-1298 | XM_0170260 | CHST9 | 1 |
| hsa-miR-2113 | XM_0170260 | CHST9 | 1 |
| hsa-miR-2113 | XM_0170260 | CHST9 | 1 |
| hsa-miR-761  | XM_0170260 | CHST9 | 1 |
| hsa-miR-765  | XM_0170260 | CHST9 | 1 |
| hsa-miR-765  | XM_0170260 | CHST9 | 1 |
| hsa-miR-675- | XM_0170260 | CHST9 | 1 |





















|                               |            |
|-------------------------------|------------|
| hsa-miR-1035 XM_0170260 CHST9 | 1          |
| hsa-miR-1035 XM_0170260 CHST9 | 1          |
| hsa-miR-104C XM_0170260 CHST9 | 1          |
| hsa-miR-1035 XM_0170260 CHST9 | 1          |
| hsa-miR-1035 XM_0170260 CHST9 | 1          |
| hsa-miR-1052 XM_0170260 CHST9 | 1          |
| hsa-miR-1052 XM_0170260 CHST9 | 1          |
| hsa-miR-1052 XM_0170260 CHST9 | 1          |
| hsa-miR-1135 XM_0170260 CHST9 | 1          |
| hsa-miR-114C XM_0170260 CHST9 | 1          |
| hsa-miR-114C XM_0170260 CHST9 | 1          |
| hsa-miR-114C XM_0170260 CHST9 | 1          |
| hsa-miR-3055 XM_0170260 CHST9 | 1          |
| hsa-miR-3055 XM_0170260 CHST9 | 1          |
| hsa-miR-9851 XM_0170260 CHST9 | 1          |
| hsa-miR-1211 XM_0170260 CHST9 | 1          |
| hsa-miR-1211 XM_0170260 CHST9 | 1          |
| hsa-miR-1211 XM_0170260 CHST9 | 1          |
| hsa-miR-1212 XM_0170260 CHST9 | 1          |
| hsa-miR-1212 XM_0170260 CHST9 | 1          |
| hsa-miR-1212 XM_0170260 CHST9 | 1          |
| hsa-miR-1213 XM_0170260 CHST9 | 1          |
| hsa-miR-652- NM_0012675 PRC1  | 0.95384615 |
| hsa-miR-3151 NM_0012675 PRC1  | 0.95384615 |
| hsa-miR-3908 NM_0012675 PRC1  | 0.95384615 |
| hsa-miR-6788 NM_0012675 PRC1  | 0.95384615 |
| hsa-miR-512- NM_199413 PRC1   | 0.95384615 |
| hsa-miR-3151 NM_199413 PRC1   | 0.95384615 |
| hsa-miR-3908 NM_199413 PRC1   | 0.95384615 |
| hsa-miR-6788 NM_199413 PRC1   | 0.95384615 |
| hsa-miR-512- NM_003981 PRC1   | 0.95384615 |
| hsa-miR-3151 NM_003981 PRC1   | 0.95384615 |
| hsa-miR-3908 NM_003981 PRC1   | 0.95384615 |
| hsa-miR-6788 NM_003981 PRC1   | 0.95384615 |
| hsa-miR-140- NM_0012675 PRC1  | 0.96153846 |
| hsa-miR-520c NM_0012675 PRC1  | 0.96153846 |
| hsa-miR-520h NM_0012675 PRC1  | 0.96153846 |
| hsa-miR-617 NM_0012675 PRC1   | 0.96153846 |
| hsa-miR-4302 NM_0012675 PRC1  | 0.96153846 |
| hsa-miR-427C NM_0012675 PRC1  | 0.96153846 |
| hsa-miR-3937 NM_0012675 PRC1  | 0.96153846 |
| hsa-miR-1587 NM_0012675 PRC1  | 0.96153846 |
| hsa-miR-4684 NM_0012675 PRC1  | 0.96153846 |
| hsa-miR-6776 NM_0012675 PRC1  | 0.96153846 |
| hsa-miR-6846 NM_0012675 PRC1  | 0.96153846 |
| hsa-miR-31-5j NM_199413 PRC1  | 0.96153846 |
| hsa-miR-140- NM_199413 PRC1   | 0.96153846 |
| hsa-miR-520c NM_199413 PRC1   | 0.96153846 |
| hsa-miR-520h NM_199413 PRC1   | 0.96153846 |
| hsa-miR-617 NM_199413 PRC1    | 0.96153846 |
| hsa-miR-4302 NM_199413 PRC1   | 0.96153846 |
| hsa-miR-427C NM_199413 PRC1   | 0.96153846 |
| hsa-miR-464C NM_199413 PRC1   | 0.96153846 |
| hsa-miR-4684 NM_199413 PRC1   | 0.96153846 |
| hsa-miR-6088 NM_199413 PRC1   | 0.96153846 |
| hsa-miR-6776 NM_199413 PRC1   | 0.96153846 |
| hsa-miR-6893 NM_199413 PRC1   | 0.96153846 |
| hsa-miR-31-5j NM_003981 PRC1  | 0.96153846 |
| hsa-miR-140- NM_003981 PRC1   | 0.96153846 |
| hsa-miR-520c NM_003981 PRC1   | 0.96153846 |
| hsa-miR-520h NM_003981 PRC1   | 0.96153846 |
| hsa-miR-617 NM_003981 PRC1    | 0.96153846 |
| hsa-miR-4302 NM_003981 PRC1   | 0.96153846 |
| hsa-miR-427C NM_003981 PRC1   | 0.96153846 |
| hsa-miR-464C NM_003981 PRC1   | 0.96153846 |
| hsa-miR-4684 NM_003981 PRC1   | 0.96153846 |
| hsa-miR-6088 NM_003981 PRC1   | 0.96153846 |
| hsa-miR-6776 NM_003981 PRC1   | 0.96153846 |
| hsa-miR-6893 NM_003981 PRC1   | 0.96153846 |
| hsa-miR-373- NM_0012675 PRC1  | 0.96923077 |
| hsa-miR-520d NM_0012675 PRC1  | 0.96923077 |
| hsa-miR-504- NM_0012675 PRC1  | 0.96923077 |
| hsa-miR-7113 NM_0012675 PRC1  | 0.96923077 |
| hsa-miR-373- NM_199413 PRC1   | 0.96923077 |
| hsa-miR-373- NM_003981 PRC1   | 0.96923077 |
| hsa-miR-1247 NM_0012675 PRC1  | 0.97435897 |
| hsa-miR-7843 NM_0012675 PRC1  | 0.97435897 |
| hsa-miR-8065 NM_0012675 PRC1  | 0.97435897 |
| hsa-miR-1247 NM_199413 PRC1   | 0.97435897 |
| hsa-miR-1972 NM_199413 PRC1   | 0.97435897 |
| hsa-miR-1247 NM_003981 PRC1   | 0.97435897 |
| hsa-miR-1972 NM_003981 PRC1   | 0.97435897 |
| hsa-miR-4794 NM_0012675 PRC1  | 0.98076923 |
| hsa-miR-6081 NM_0012675 PRC1  | 0.98076923 |
| hsa-miR-6834 NM_0012675 PRC1  | 0.98076923 |
| hsa-miR-148a NM_199413 PRC1   | 0.98076923 |
| hsa-miR-148a NM_003981 PRC1   | 0.98076923 |
| hsa-miR-30c-1 NM_0012675 PRC1 | 0.98461539 |
| hsa-miR-6891 NM_0012675 PRC1  | 0.98461539 |

|                        |            |            |   |
|------------------------|------------|------------|---|
| hsa-miR-6891 NM_199413 | PRC1       | 0.98461539 |   |
| hsa-miR-6891 NM_003981 | PRC1       | 0.98461539 |   |
| hsa-let-7b-5p          | NM_0012675 | PRC1       | 1 |
| hsa-let-7d-5p          | NM_0012675 | PRC1       | 1 |
| hsa-let-7e-3p          | NM_0012675 | PRC1       | 1 |
| hsa-miR-15a-           | NM_0012675 | PRC1       | 1 |
| hsa-miR-16-1-          | NM_0012675 | PRC1       | 1 |
| hsa-miR-19b-           | NM_0012675 | PRC1       | 1 |
| hsa-miR-22-5j          | NM_0012675 | PRC1       | 1 |
| hsa-miR-22-3j          | NM_0012675 | PRC1       | 1 |
| hsa-miR-23a-           | NM_0012675 | PRC1       | 1 |
| hsa-miR-24-3j          | NM_0012675 | PRC1       | 1 |
| hsa-miR-25-5j          | NM_0012675 | PRC1       | 1 |
| hsa-miR-92a-           | NM_0012675 | PRC1       | 1 |
| hsa-miR-93-3j          | NM_0012675 | PRC1       | 1 |
| hsa-miR-192-           | NM_0012675 | PRC1       | 1 |
| hsa-miR-197-           | NM_0012675 | PRC1       | 1 |
| hsa-miR-208a           | NM_0012675 | PRC1       | 1 |
| hsa-miR-148a           | NM_0012675 | PRC1       | 1 |
| hsa-miR-7-2-3          | NM_0012675 | PRC1       | 1 |
| hsa-miR-182-           | NM_0012675 | PRC1       | 1 |
| hsa-miR-203a           | NM_0012675 | PRC1       | 1 |
| hsa-miR-204-           | NM_0012675 | PRC1       | 1 |
| hsa-miR-210-           | NM_0012675 | PRC1       | 1 |
| hsa-miR-211-           | NM_0012675 | PRC1       | 1 |
| hsa-miR-214-           | NM_0012675 | PRC1       | 1 |
| hsa-miR-216a           | NM_0012675 | PRC1       | 1 |
| hsa-miR-224-           | NM_0012675 | PRC1       | 1 |
| hsa-miR-27b-           | NM_0012675 | PRC1       | 1 |
| hsa-miR-124-           | NM_0012675 | PRC1       | 1 |
| hsa-miR-125t           | NM_0012675 | PRC1       | 1 |
| hsa-miR-125t           | NM_0012675 | PRC1       | 1 |
| hsa-miR-125t           | NM_0012675 | PRC1       | 1 |
| hsa-miR-125t           | NM_0012675 | PRC1       | 1 |
| hsa-miR-132-           | NM_0012675 | PRC1       | 1 |
| hsa-miR-145-           | NM_0012675 | PRC1       | 1 |
| hsa-miR-153-           | NM_0012675 | PRC1       | 1 |
| hsa-miR-191-           | NM_0012675 | PRC1       | 1 |
| hsa-miR-125a           | NM_0012675 | PRC1       | 1 |
| hsa-miR-125a           | NM_0012675 | PRC1       | 1 |
| hsa-miR-125t           | NM_0012675 | PRC1       | 1 |
| hsa-miR-138-           | NM_0012675 | PRC1       | 1 |
| hsa-miR-149-           | NM_0012675 | PRC1       | 1 |
| hsa-miR-188-           | NM_0012675 | PRC1       | 1 |
| hsa-miR-193a           | NM_0012675 | PRC1       | 1 |
| hsa-miR-320a           | NM_0012675 | PRC1       | 1 |
| hsa-miR-194-           | NM_0012675 | PRC1       | 1 |
| hsa-miR-194-           | NM_0012675 | PRC1       | 1 |
| hsa-miR-106b           | NM_0012675 | PRC1       | 1 |
| hsa-miR-29c-           | NM_0012675 | PRC1       | 1 |
| hsa-miR-30c-           | NM_0012675 | PRC1       | 1 |
| hsa-miR-219a           | NM_0012675 | PRC1       | 1 |
| hsa-miR-365a           | NM_0012675 | PRC1       | 1 |
| hsa-miR-370-           | NM_0012675 | PRC1       | 1 |
| hsa-miR-370-           | NM_0012675 | PRC1       | 1 |
| hsa-miR-328-           | NM_0012675 | PRC1       | 1 |
| hsa-miR-135t           | NM_0012675 | PRC1       | 1 |
| hsa-miR-331-           | NM_0012675 | PRC1       | 1 |
| hsa-miR-345-           | NM_0012675 | PRC1       | 1 |
| hsa-miR-423-           | NM_0012675 | PRC1       | 1 |
| hsa-miR-423-           | NM_0012675 | PRC1       | 1 |
| hsa-miR-449a           | NM_0012675 | PRC1       | 1 |
| hsa-miR-412-           | NM_0012675 | PRC1       | 1 |
| hsa-miR-202-           | NM_0012675 | PRC1       | 1 |
| hsa-miR-193b           | NM_0012675 | PRC1       | 1 |
| hsa-miR-181d           | NM_0012675 | PRC1       | 1 |
| hsa-miR-512-           | NM_0012675 | PRC1       | 1 |
| hsa-miR-523-           | NM_0012675 | PRC1       | 1 |
| hsa-miR-524-           | NM_0012675 | PRC1       | 1 |
| hsa-miR-521            | NM_0012675 | PRC1       | 1 |
| hsa-miR-520g           | NM_0012675 | PRC1       | 1 |
| hsa-miR-520g           | NM_0012675 | PRC1       | 1 |
| hsa-miR-518a           | NM_0012675 | PRC1       | 1 |
| hsa-miR-501-           | NM_0012675 | PRC1       | 1 |
| hsa-miR-450a           | NM_0012675 | PRC1       | 1 |
| hsa-miR-503-           | NM_0012675 | PRC1       | 1 |
| hsa-miR-504-           | NM_0012675 | PRC1       | 1 |
| hsa-miR-509-           | NM_0012675 | PRC1       | 1 |
| hsa-miR-557            | NM_0012675 | PRC1       | 1 |
| hsa-miR-574-           | NM_0012675 | PRC1       | 1 |
| hsa-miR-575            | NM_0012675 | PRC1       | 1 |
| hsa-miR-575            | NM_0012675 | PRC1       | 1 |
| hsa-miR-576-           | NM_0012675 | PRC1       | 1 |
| hsa-miR-583            | NM_0012675 | PRC1       | 1 |
| hsa-miR-589-           | NM_0012675 | PRC1       | 1 |
| hsa-miR-589-           | NM_0012675 | PRC1       | 1 |
| hsa-miR-602            | NM_0012675 | PRC1       | 1 |
| hsa-miR-629-           | NM_0012675 | PRC1       | 1 |
| hsa-miR-641            | NM_0012675 | PRC1       | 1 |
| hsa-miR-650            | NM_0012675 | PRC1       | 1 |
| hsa-miR-652-           | NM_0012675 | PRC1       | 1 |
| hsa-miR-449t           | NM_0012675 | PRC1       | 1 |
| hsa-miR-656-           | NM_0012675 | PRC1       | 1 |
| hsa-miR-657            | NM_0012675 | PRC1       | 1 |
| hsa-miR-658            | NM_0012675 | PRC1       | 1 |

|                         |            |      |   |
|-------------------------|------------|------|---|
| hsa-miR-660:-NM_0012675 | PRC1       | 1    |   |
| hsa-miR-671:-NM_0012675 | PRC1       | 1    |   |
| hsa-miR-1224            | NM_0012675 | PRC1 | 1 |
| hsa-miR-320t            | NM_0012675 | PRC1 | 1 |
| hsa-miR-320b            | NM_0012675 | PRC1 | 1 |
| hsa-miR-320c            | NM_0012675 | PRC1 | 1 |
| hsa-miR-449c            | NM_0012675 | PRC1 | 1 |
| hsa-miR-1298            | NM_0012675 | PRC1 | 1 |
| hsa-miR-765             | NM_0012675 | PRC1 | 1 |
| hsa-miR-675:-NM_0012675 | PRC1       | 1    |   |
| hsa-miR-675:-NM_0012675 | PRC1       | 1    |   |
| hsa-miR-744:-NM_0012675 | PRC1       | 1    |   |
| hsa-miR-885:-NM_0012675 | PRC1       | 1    |   |
| hsa-miR-877:-NM_0012675 | PRC1       | 1    |   |
| hsa-miR-877:-NM_0012675 | PRC1       | 1    |   |
| hsa-miR-665             | NM_0012675 | PRC1 | 1 |
| hsa-miR-760             | NM_0012675 | PRC1 | 1 |
| hsa-miR-920             | NM_0012675 | PRC1 | 1 |
| hsa-miR-937:-NM_0012675 | PRC1       | 1    |   |
| hsa-miR-939:-NM_0012675 | PRC1       | 1    |   |
| hsa-miR-941             | NM_0012675 | PRC1 | 1 |
| hsa-miR-297             | NM_0012675 | PRC1 | 1 |
| hsa-miR-1182            | NM_0012675 | PRC1 | 1 |
| hsa-miR-1225            | NM_0012675 | PRC1 | 1 |
| hsa-miR-1227            | NM_0012675 | PRC1 | 1 |
| hsa-miR-1227            | NM_0012675 | PRC1 | 1 |
| hsa-miR-1228            | NM_0012675 | PRC1 | 1 |
| hsa-miR-1229            | NM_0012675 | PRC1 | 1 |
| hsa-miR-1231            | NM_0012675 | PRC1 | 1 |
| hsa-miR-1233            | NM_0012675 | PRC1 | 1 |
| hsa-miR-1237            | NM_0012675 | PRC1 | 1 |
| hsa-miR-1237            | NM_0012675 | PRC1 | 1 |
| hsa-miR-1237            | NM_0012675 | PRC1 | 1 |
| hsa-miR-1238            | NM_0012675 | PRC1 | 1 |
| hsa-miR-1203            | NM_0012675 | PRC1 | 1 |
| hsa-miR-663t            | NM_0012675 | PRC1 | 1 |
| hsa-miR-1204            | NM_0012675 | PRC1 | 1 |
| hsa-miR-1208            | NM_0012675 | PRC1 | 1 |
| hsa-miR-1246            | NM_0012675 | PRC1 | 1 |
| hsa-miR-1258            | NM_0012675 | PRC1 | 1 |
| hsa-miR-1261            | NM_0012675 | PRC1 | 1 |
| hsa-miR-1266            | NM_0012675 | PRC1 | 1 |
| hsa-miR-1268            | NM_0012675 | PRC1 | 1 |
| hsa-miR-1275            | NM_0012675 | PRC1 | 1 |
| hsa-miR-548i            | NM_0012675 | PRC1 | 1 |
| hsa-miR-1306            | NM_0012675 | PRC1 | 1 |
| hsa-miR-513t            | NM_0012675 | PRC1 | 1 |
| hsa-miR-1321            | NM_0012675 | PRC1 | 1 |
| hsa-miR-1908            | NM_0012675 | PRC1 | 1 |
| hsa-miR-2114            | NM_0012675 | PRC1 | 1 |
| hsa-miR-2115            | NM_0012675 | PRC1 | 1 |
| hsa-miR-2116            | NM_0012675 | PRC1 | 1 |
| hsa-miR-711             | NM_0012675 | PRC1 | 1 |
| hsa-miR-2861            | NM_0012675 | PRC1 | 1 |
| hsa-miR-2861            | NM_0012675 | PRC1 | 1 |
| hsa-miR-2861            | NM_0012675 | PRC1 | 1 |
| hsa-miR-2909            | NM_0012675 | PRC1 | 1 |
| hsa-miR-312C            | NM_0012675 | PRC1 | 1 |
| hsa-miR-3126            | NM_0012675 | PRC1 | 1 |
| hsa-miR-3127            | NM_0012675 | PRC1 | 1 |
| hsa-miR-313C            | NM_0012675 | PRC1 | 1 |
| hsa-miR-3132            | NM_0012675 | PRC1 | 1 |
| hsa-miR-3135            | NM_0012675 | PRC1 | 1 |
| hsa-miR-3142            | NM_0012675 | PRC1 | 1 |
| hsa-miR-315C            | NM_0012675 | PRC1 | 1 |
| hsa-miR-3173            | NM_0012675 | PRC1 | 1 |
| hsa-miR-323t            | NM_0012675 | PRC1 | 1 |
| hsa-miR-3176            | NM_0012675 | PRC1 | 1 |
| hsa-miR-548v            | NM_0012675 | PRC1 | 1 |
| hsa-miR-3187            | NM_0012675 | PRC1 | 1 |
| hsa-miR-319C            | NM_0012675 | PRC1 | 1 |
| hsa-miR-3191            | NM_0012675 | PRC1 | 1 |
| hsa-miR-3194            | NM_0012675 | PRC1 | 1 |
| hsa-miR-3198            | NM_0012675 | PRC1 | 1 |
| hsa-miR-3199            | NM_0012675 | PRC1 | 1 |
| hsa-miR-3202            | NM_0012675 | PRC1 | 1 |
| hsa-miR-4296            | NM_0012675 | PRC1 | 1 |
| hsa-miR-4296            | NM_0012675 | PRC1 | 1 |
| hsa-miR-4294            | NM_0012675 | PRC1 | 1 |
| hsa-miR-4294            | NM_0012675 | PRC1 | 1 |
| hsa-miR-4295            | NM_0012675 | PRC1 | 1 |
| hsa-miR-4302            | NM_0012675 | PRC1 | 1 |
| hsa-miR-4259            | NM_0012675 | PRC1 | 1 |
| hsa-miR-4266            | NM_0012675 | PRC1 | 1 |
| hsa-miR-4269            | NM_0012675 | PRC1 | 1 |
| hsa-miR-4271            | NM_0012675 | PRC1 | 1 |
| hsa-miR-4281            | NM_0012675 | PRC1 | 1 |
| hsa-miR-4281            | NM_0012675 | PRC1 | 1 |
| hsa-miR-4289            | NM_0012675 | PRC1 | 1 |
| hsa-miR-3605            | NM_0012675 | PRC1 | 1 |
| hsa-miR-3619            | NM_0012675 | PRC1 | 1 |
| hsa-miR-3622            | NM_0012675 | PRC1 | 1 |
| hsa-miR-3648            | NM_0012675 | PRC1 | 1 |
| hsa-miR-3664            | NM_0012675 | PRC1 | 1 |
| hsa-miR-3665            | NM_0012675 | PRC1 | 1 |
| hsa-miR-3677            | NM_0012675 | PRC1 | 1 |
| hsa-miR-3911            | NM_0012675 | PRC1 | 1 |

|                              |   |
|------------------------------|---|
| hsa-miR-3916 NM_0012675 PRC1 | 1 |
| hsa-miR-3915 NM_0012675 PRC1 | 1 |
| hsa-miR-3150 NM_0012675 PRC1 | 1 |
| hsa-miR-3926 NM_0012675 PRC1 | 1 |
| hsa-miR-3926 NM_0012675 PRC1 | 1 |
| hsa-miR-3934 NM_0012675 PRC1 | 1 |
| hsa-miR-3945 NM_0012675 PRC1 | 1 |
| hsa-miR-1268 NM_0012675 PRC1 | 1 |
| hsa-miR-4430 NM_0012675 PRC1 | 1 |
| hsa-miR-4433 NM_0012675 PRC1 | 1 |
| hsa-miR-4437 NM_0012675 PRC1 | 1 |
| hsa-miR-4440 NM_0012675 PRC1 | 1 |
| hsa-miR-4446 NM_0012675 PRC1 | 1 |
| hsa-miR-4446 NM_0012675 PRC1 | 1 |
| hsa-miR-548a NM_0012675 PRC1 | 1 |
| hsa-miR-4458 NM_0012675 PRC1 | 1 |
| hsa-miR-4472 NM_0012675 PRC1 | 1 |
| hsa-miR-4474 NM_0012675 PRC1 | 1 |
| hsa-miR-4478 NM_0012675 PRC1 | 1 |
| hsa-miR-548a NM_0012675 PRC1 | 1 |
| hsa-miR-4482 NM_0012675 PRC1 | 1 |
| hsa-miR-4488 NM_0012675 PRC1 | 1 |
| hsa-miR-4490 NM_0012675 PRC1 | 1 |
| hsa-miR-4497 NM_0012675 PRC1 | 1 |
| hsa-miR-4498 NM_0012675 PRC1 | 1 |
| hsa-miR-4499 NM_0012675 PRC1 | 1 |
| hsa-miR-4502 NM_0012675 PRC1 | 1 |
| hsa-miR-4508 NM_0012675 PRC1 | 1 |
| hsa-miR-4510 NM_0012675 PRC1 | 1 |
| hsa-miR-4513 NM_0012675 PRC1 | 1 |
| hsa-miR-4515 NM_0012675 PRC1 | 1 |
| hsa-miR-4519 NM_0012675 PRC1 | 1 |
| hsa-miR-4535 NM_0012675 PRC1 | 1 |
| hsa-miR-4538 NM_0012675 PRC1 | 1 |
| hsa-miR-4540 NM_0012675 PRC1 | 1 |
| hsa-miR-3960 NM_0012675 PRC1 | 1 |
| hsa-miR-3976 NM_0012675 PRC1 | 1 |
| hsa-miR-3977 NM_0012675 PRC1 | 1 |
| hsa-miR-4635 NM_0012675 PRC1 | 1 |
| hsa-miR-4638 NM_0012675 PRC1 | 1 |
| hsa-miR-4642 NM_0012675 PRC1 | 1 |
| hsa-miR-4646 NM_0012675 PRC1 | 1 |
| hsa-miR-4649 NM_0012675 PRC1 | 1 |
| hsa-miR-4649 NM_0012675 PRC1 | 1 |
| hsa-miR-4651 NM_0012675 PRC1 | 1 |
| hsa-miR-4651 NM_0012675 PRC1 | 1 |
| hsa-miR-4653 NM_0012675 PRC1 | 1 |
| hsa-miR-4654 NM_0012675 PRC1 | 1 |
| hsa-miR-4656 NM_0012675 PRC1 | 1 |
| hsa-miR-4656 NM_0012675 PRC1 | 1 |
| hsa-miR-4666 NM_0012675 PRC1 | 1 |
| hsa-miR-4667 NM_0012675 PRC1 | 1 |
| hsa-miR-4687 NM_0012675 PRC1 | 1 |
| hsa-miR-1343 NM_0012675 PRC1 | 1 |
| hsa-miR-4690 NM_0012675 PRC1 | 1 |
| hsa-miR-4691 NM_0012675 PRC1 | 1 |
| hsa-miR-4697 NM_0012675 PRC1 | 1 |
| hsa-miR-4700 NM_0012675 PRC1 | 1 |
| hsa-miR-4701 NM_0012675 PRC1 | 1 |
| hsa-miR-4707 NM_0012675 PRC1 | 1 |
| hsa-miR-4707 NM_0012675 PRC1 | 1 |
| hsa-miR-4710 NM_0012675 PRC1 | 1 |
| hsa-miR-3529 NM_0012675 PRC1 | 1 |
| hsa-miR-4723 NM_0012675 PRC1 | 1 |
| hsa-miR-4733 NM_0012675 PRC1 | 1 |
| hsa-miR-4736 NM_0012675 PRC1 | 1 |
| hsa-miR-4741 NM_0012675 PRC1 | 1 |
| hsa-miR-4743 NM_0012675 PRC1 | 1 |
| hsa-miR-4745 NM_0012675 PRC1 | 1 |
| hsa-miR-4761 NM_0012675 PRC1 | 1 |
| hsa-miR-4436 NM_0012675 PRC1 | 1 |
| hsa-miR-2467 NM_0012675 PRC1 | 1 |
| hsa-miR-4787 NM_0012675 PRC1 | 1 |
| hsa-miR-4799 NM_0012675 PRC1 | 1 |
| hsa-miR-4802 NM_0012675 PRC1 | 1 |
| hsa-miR-5004 NM_0012675 PRC1 | 1 |
| hsa-miR-5004 NM_0012675 PRC1 | 1 |
| hsa-miR-5006 NM_0012675 PRC1 | 1 |
| hsa-miR-5010 NM_0012675 PRC1 | 1 |
| hsa-miR-5010 NM_0012675 PRC1 | 1 |
| hsa-miR-5047 NM_0012675 PRC1 | 1 |
| hsa-miR-5088 NM_0012675 PRC1 | 1 |
| hsa-miR-5088 NM_0012675 PRC1 | 1 |
| hsa-miR-5092 NM_0012675 PRC1 | 1 |
| hsa-miR-5189 NM_0012675 PRC1 | 1 |
| hsa-miR-5197 NM_0012675 PRC1 | 1 |
| hsa-miR-5572 NM_0012675 PRC1 | 1 |
| hsa-miR-548a NM_0012675 PRC1 | 1 |
| hsa-miR-664b NM_0012675 PRC1 | 1 |
| hsa-miR-5584 NM_0012675 PRC1 | 1 |
| hsa-miR-5585 NM_0012675 PRC1 | 1 |
| hsa-miR-5587 NM_0012675 PRC1 | 1 |
| hsa-miR-1295 NM_0012675 PRC1 | 1 |



|                         |      |   |
|-------------------------|------|---|
| hsa-miR-6884 NM_0012675 | PRC1 | 1 |
| hsa-miR-6886 NM_0012675 | PRC1 | 1 |
| hsa-miR-6887 NM_0012675 | PRC1 | 1 |
| hsa-miR-6887 NM_0012675 | PRC1 | 1 |
| hsa-miR-6888 NM_0012675 | PRC1 | 1 |
| hsa-miR-6888 NM_0012675 | PRC1 | 1 |
| hsa-miR-6889 NM_0012675 | PRC1 | 1 |
| hsa-miR-6893 NM_0012675 | PRC1 | 1 |
| hsa-miR-6893 NM_0012675 | PRC1 | 1 |
| hsa-miR-6893 NM_0012675 | PRC1 | 1 |
| hsa-miR-6895 NM_0012675 | PRC1 | 1 |
| hsa-miR-7106 NM_0012675 | PRC1 | 1 |
| hsa-miR-7106 NM_0012675 | PRC1 | 1 |
| hsa-miR-7111 NM_0012675 | PRC1 | 1 |
| hsa-miR-7111 NM_0012675 | PRC1 | 1 |
| hsa-miR-7112 NM_0012675 | PRC1 | 1 |
| hsa-miR-7153 NM_0012675 | PRC1 | 1 |
| hsa-miR-7155 NM_0012675 | PRC1 | 1 |
| hsa-miR-7158 NM_0012675 | PRC1 | 1 |
| hsa-miR-7162 NM_0012675 | PRC1 | 1 |
| hsa-miR-7702 NM_0012675 | PRC1 | 1 |
| hsa-miR-1273 NM_0012675 | PRC1 | 1 |
| hsa-miR-1273 NM_0012675 | PRC1 | 1 |
| hsa-miR-6516 NM_0012675 | PRC1 | 1 |
| hsa-miR-7845 NM_0012675 | PRC1 | 1 |
| hsa-miR-7847 NM_0012675 | PRC1 | 1 |
| hsa-miR-7855 NM_0012675 | PRC1 | 1 |
| hsa-miR-548t NM_0012675 | PRC1 | 1 |
| hsa-miR-8053 NM_0012675 | PRC1 | 1 |
| hsa-miR-8063 NM_0012675 | PRC1 | 1 |
| hsa-miR-8072 NM_0012675 | PRC1 | 1 |
| hsa-miR-8075 NM_0012675 | PRC1 | 1 |
| hsa-miR-8077 NM_0012675 | PRC1 | 1 |
| hsa-miR-8083 NM_0012675 | PRC1 | 1 |
| hsa-miR-8085 NM_0012675 | PRC1 | 1 |
| hsa-miR-1035 NM_0012675 | PRC1 | 1 |
| hsa-miR-9851 NM_0012675 | PRC1 | 1 |
| hsa-miR-1211 NM_0012675 | PRC1 | 1 |
| hsa-miR-1211 NM_0012675 | PRC1 | 1 |
| hsa-miR-1211 NM_0012675 | PRC1 | 1 |
| hsa-miR-1212 NM_0012675 | PRC1 | 1 |
| hsa-miR-1212 NM_0012675 | PRC1 | 1 |
| hsa-let-7b-5p NM_199413 | PRC1 | 1 |
| hsa-let-7e-3p NM_199413 | PRC1 | 1 |
| hsa-miR-15a- NM_199413  | PRC1 | 1 |
| hsa-miR-16-1- NM_199413 | PRC1 | 1 |
| hsa-miR-22-5j NM_199413 | PRC1 | 1 |
| hsa-miR-22-3j NM_199413 | PRC1 | 1 |
| hsa-miR-23a- NM_199413  | PRC1 | 1 |
| hsa-miR-25-5j NM_199413 | PRC1 | 1 |
| hsa-miR-92a- NM_199413  | PRC1 | 1 |
| hsa-miR-93-3j NM_199413 | PRC1 | 1 |
| hsa-miR-103a NM_199413  | PRC1 | 1 |
| hsa-miR-107 NM_199413   | PRC1 | 1 |
| hsa-miR-192- NM_199413  | PRC1 | 1 |
| hsa-miR-197- NM_199413  | PRC1 | 1 |
| hsa-miR-208a NM_199413  | PRC1 | 1 |
| hsa-miR-7-2-3 NM_199413 | PRC1 | 1 |
| hsa-miR-204- NM_199413  | PRC1 | 1 |
| hsa-miR-210- NM_199413  | PRC1 | 1 |
| hsa-miR-211- NM_199413  | PRC1 | 1 |
| hsa-miR-214- NM_199413  | PRC1 | 1 |
| hsa-miR-216a NM_199413  | PRC1 | 1 |
| hsa-miR-223- NM_199413  | PRC1 | 1 |
| hsa-miR-224- NM_199413  | PRC1 | 1 |
| hsa-miR-27b- NM_199413  | PRC1 | 1 |
| hsa-miR-124- NM_199413  | PRC1 | 1 |
| hsa-miR-125t NM_199413  | PRC1 | 1 |
| hsa-miR-125t NM_199413  | PRC1 | 1 |
| hsa-miR-125t NM_199413  | PRC1 | 1 |
| hsa-miR-132- NM_199413  | PRC1 | 1 |
| hsa-miR-138- NM_199413  | PRC1 | 1 |
| hsa-miR-145- NM_199413  | PRC1 | 1 |
| hsa-miR-153- NM_199413  | PRC1 | 1 |
| hsa-miR-191- NM_199413  | PRC1 | 1 |
| hsa-miR-125a NM_199413  | PRC1 | 1 |
| hsa-miR-125t NM_199413  | PRC1 | 1 |
| hsa-miR-149- NM_199413  | PRC1 | 1 |
| hsa-miR-188- NM_199413  | PRC1 | 1 |
| hsa-miR-188- NM_199413  | PRC1 | 1 |
| hsa-miR-193a NM_199413  | PRC1 | 1 |
| hsa-miR-194- NM_199413  | PRC1 | 1 |
| hsa-miR-106b NM_199413  | PRC1 | 1 |
| hsa-miR-29c- NM_199413  | PRC1 | 1 |
| hsa-miR-30c- NM_199413  | PRC1 | 1 |
| hsa-miR-219a NM_199413  | PRC1 | 1 |
| hsa-miR-370- NM_199413  | PRC1 | 1 |
| hsa-miR-328- NM_199413  | PRC1 | 1 |
| hsa-miR-331- NM_199413  | PRC1 | 1 |
| hsa-miR-423- NM_199413  | PRC1 | 1 |
| hsa-miR-423- NM_199413  | PRC1 | 1 |
| hsa-miR-449a NM_199413  | PRC1 | 1 |
| hsa-miR-412- NM_199413  | PRC1 | 1 |
| hsa-miR-202- NM_199413  | PRC1 | 1 |
| hsa-miR-432- NM_199413  | PRC1 | 1 |
| hsa-miR-193t NM_199413  | PRC1 | 1 |



|                         |      |   |
|-------------------------|------|---|
| hsa-miR-519c NM_199413  | PRC1 | 1 |
| hsa-miR-519b NM_199413  | PRC1 | 1 |
| hsa-miR-523-1 NM_199413 | PRC1 | 1 |
| hsa-miR-518f NM_199413  | PRC1 | 1 |
| hsa-miR-526a NM_199413  | PRC1 | 1 |
| hsa-miR-520c NM_199413  | PRC1 | 1 |
| hsa-miR-524-1 NM_199413 | PRC1 | 1 |
| hsa-miR-521 NM_199413   | PRC1 | 1 |
| hsa-miR-520d NM_199413  | PRC1 | 1 |
| hsa-miR-520g NM_199413  | PRC1 | 1 |
| hsa-miR-520g NM_199413  | PRC1 | 1 |
| hsa-miR-516b NM_199413  | PRC1 | 1 |
| hsa-miR-518e NM_199413  | PRC1 | 1 |
| hsa-miR-518d NM_199413  | PRC1 | 1 |
| hsa-miR-522-1 NM_199413 | PRC1 | 1 |
| hsa-miR-519a NM_199413  | PRC1 | 1 |
| hsa-miR-516a NM_199413  | PRC1 | 1 |
| hsa-miR-501-1 NM_199413 | PRC1 | 1 |
| hsa-miR-450a NM_199413  | PRC1 | 1 |
| hsa-miR-503-1 NM_199413 | PRC1 | 1 |
| hsa-miR-504-1 NM_199413 | PRC1 | 1 |
| hsa-miR-504-1 NM_199413 | PRC1 | 1 |
| hsa-miR-506-1 NM_199413 | PRC1 | 1 |
| hsa-miR-509-1 NM_199413 | PRC1 | 1 |
| hsa-miR-539-1 NM_199413 | PRC1 | 1 |
| hsa-miR-92b-1 NM_199413 | PRC1 | 1 |
| hsa-miR-557 NM_199413   | PRC1 | 1 |
| hsa-miR-575 NM_199413   | PRC1 | 1 |
| hsa-miR-575 NM_199413   | PRC1 | 1 |
| hsa-miR-576-1 NM_199413 | PRC1 | 1 |
| hsa-miR-583 NM_199413   | PRC1 | 1 |
| hsa-miR-584-1 NM_199413 | PRC1 | 1 |
| hsa-miR-589-1 NM_199413 | PRC1 | 1 |
| hsa-miR-601 NM_199413   | PRC1 | 1 |
| hsa-miR-602 NM_199413   | PRC1 | 1 |
| hsa-miR-610 NM_199413   | PRC1 | 1 |
| hsa-miR-629-1 NM_199413 | PRC1 | 1 |
| hsa-miR-641 NM_199413   | PRC1 | 1 |
| hsa-miR-652-1 NM_199413 | PRC1 | 1 |
| hsa-miR-449b NM_199413  | PRC1 | 1 |
| hsa-miR-656-1 NM_199413 | PRC1 | 1 |
| hsa-miR-658 NM_199413   | PRC1 | 1 |
| hsa-miR-671-1 NM_199413 | PRC1 | 1 |
| hsa-miR-668-1 NM_199413 | PRC1 | 1 |
| hsa-miR-320b NM_199413  | PRC1 | 1 |
| hsa-miR-320b NM_199413  | PRC1 | 1 |
| hsa-miR-320c NM_199413  | PRC1 | 1 |
| hsa-miR-449c NM_199413  | PRC1 | 1 |
| hsa-miR-1298 NM_199413  | PRC1 | 1 |
| hsa-miR-770-1 NM_199413 | PRC1 | 1 |
| hsa-miR-675-1 NM_199413 | PRC1 | 1 |
| hsa-miR-888-1 NM_199413 | PRC1 | 1 |
| hsa-miR-744-1 NM_199413 | PRC1 | 1 |
| hsa-miR-885-1 NM_199413 | PRC1 | 1 |
| hsa-miR-877-1 NM_199413 | PRC1 | 1 |
| hsa-miR-665 NM_199413   | PRC1 | 1 |
| hsa-miR-760 NM_199413   | PRC1 | 1 |
| hsa-miR-301b NM_199413  | PRC1 | 1 |
| hsa-miR-920 NM_199413   | PRC1 | 1 |
| hsa-miR-939-1 NM_199413 | PRC1 | 1 |
| hsa-miR-941 NM_199413   | PRC1 | 1 |
| hsa-miR-1182 NM_199413  | PRC1 | 1 |
| hsa-miR-1225 NM_199413  | PRC1 | 1 |
| hsa-miR-1227 NM_199413  | PRC1 | 1 |
| hsa-miR-1227 NM_199413  | PRC1 | 1 |
| hsa-miR-1228 NM_199413  | PRC1 | 1 |
| hsa-miR-1228 NM_199413  | PRC1 | 1 |
| hsa-miR-1229 NM_199413  | PRC1 | 1 |
| hsa-miR-1231 NM_199413  | PRC1 | 1 |
| hsa-miR-1233 NM_199413  | PRC1 | 1 |
| hsa-miR-1237 NM_199413  | PRC1 | 1 |
| hsa-miR-1238 NM_199413  | PRC1 | 1 |
| hsa-miR-1203 NM_199413  | PRC1 | 1 |
| hsa-miR-663b NM_199413  | PRC1 | 1 |
| hsa-miR-1204 NM_199413  | PRC1 | 1 |
| hsa-miR-1207 NM_199413  | PRC1 | 1 |
| hsa-miR-1208 NM_199413  | PRC1 | 1 |
| hsa-miR-1246 NM_199413  | PRC1 | 1 |
| hsa-miR-1249 NM_199413  | PRC1 | 1 |
| hsa-miR-1258 NM_199413  | PRC1 | 1 |
| hsa-miR-1261 NM_199413  | PRC1 | 1 |
| hsa-miR-1268 NM_199413  | PRC1 | 1 |
| hsa-miR-1275 NM_199413  | PRC1 | 1 |
| hsa-miR-1275 NM_199413  | PRC1 | 1 |
| hsa-miR-548i NM_199413  | PRC1 | 1 |
| hsa-miR-664a NM_199413  | PRC1 | 1 |
| hsa-miR-1306 NM_199413  | PRC1 | 1 |
| hsa-miR-513b NM_199413  | PRC1 | 1 |
| hsa-miR-1321 NM_199413  | PRC1 | 1 |
| hsa-miR-1908 NM_199413  | PRC1 | 1 |
| hsa-miR-1908 NM_199413  | PRC1 | 1 |
| hsa-miR-191c NM_199413  | PRC1 | 1 |
| hsa-miR-2114 NM_199413  | PRC1 | 1 |
| hsa-miR-2115 NM_199413  | PRC1 | 1 |
| hsa-miR-2116 NM_199413  | PRC1 | 1 |

|                        |      |   |
|------------------------|------|---|
| hsa-miR-2861 NM_199413 | PRC1 | 1 |
| hsa-miR-2861 NM_199413 | PRC1 | 1 |
| hsa-miR-2909 NM_199413 | PRC1 | 1 |
| hsa-miR-312C NM_199413 | PRC1 | 1 |
| hsa-miR-3126 NM_199413 | PRC1 | 1 |
| hsa-miR-3127 NM_199413 | PRC1 | 1 |
| hsa-miR-3132 NM_199413 | PRC1 | 1 |
| hsa-miR-3135 NM_199413 | PRC1 | 1 |
| hsa-miR-3135 NM_199413 | PRC1 | 1 |
| hsa-miR-3142 NM_199413 | PRC1 | 1 |
| hsa-miR-3150 NM_199413 | PRC1 | 1 |
| hsa-miR-3176 NM_199413 | PRC1 | 1 |
| hsa-miR-548v NM_199413 | PRC1 | 1 |
| hsa-miR-3187 NM_199413 | PRC1 | 1 |
| hsa-miR-3190 NM_199413 | PRC1 | 1 |
| hsa-miR-3191 NM_199413 | PRC1 | 1 |
| hsa-miR-3198 NM_199413 | PRC1 | 1 |
| hsa-miR-3195 NM_199413 | PRC1 | 1 |
| hsa-miR-514t NM_199413 | PRC1 | 1 |
| hsa-miR-4296 NM_199413 | PRC1 | 1 |
| hsa-miR-4296 NM_199413 | PRC1 | 1 |
| hsa-miR-4298 NM_199413 | PRC1 | 1 |
| hsa-miR-4302 NM_199413 | PRC1 | 1 |
| hsa-miR-4257 NM_199413 | PRC1 | 1 |
| hsa-miR-4259 NM_199413 | PRC1 | 1 |
| hsa-miR-4266 NM_199413 | PRC1 | 1 |
| hsa-miR-4269 NM_199413 | PRC1 | 1 |
| hsa-miR-4271 NM_199413 | PRC1 | 1 |
| hsa-miR-4281 NM_199413 | PRC1 | 1 |
| hsa-miR-4289 NM_199413 | PRC1 | 1 |
| hsa-miR-3619 NM_199413 | PRC1 | 1 |
| hsa-miR-3622 NM_199413 | PRC1 | 1 |
| hsa-miR-3646 NM_199413 | PRC1 | 1 |
| hsa-miR-3648 NM_199413 | PRC1 | 1 |
| hsa-miR-3654 NM_199413 | PRC1 | 1 |
| hsa-miR-3664 NM_199413 | PRC1 | 1 |
| hsa-miR-3665 NM_199413 | PRC1 | 1 |
| hsa-miR-3677 NM_199413 | PRC1 | 1 |
| hsa-miR-3691 NM_199413 | PRC1 | 1 |
| hsa-miR-3714 NM_199413 | PRC1 | 1 |
| hsa-miR-3911 NM_199413 | PRC1 | 1 |
| hsa-miR-3150 NM_199413 | PRC1 | 1 |
| hsa-miR-3150 NM_199413 | PRC1 | 1 |
| hsa-miR-3926 NM_199413 | PRC1 | 1 |
| hsa-miR-3934 NM_199413 | PRC1 | 1 |
| hsa-miR-3934 NM_199413 | PRC1 | 1 |
| hsa-miR-3945 NM_199413 | PRC1 | 1 |
| hsa-miR-1268 NM_199413 | PRC1 | 1 |
| hsa-miR-4430 NM_199413 | PRC1 | 1 |
| hsa-miR-4433 NM_199413 | PRC1 | 1 |
| hsa-miR-4437 NM_199413 | PRC1 | 1 |
| hsa-miR-4440 NM_199413 | PRC1 | 1 |
| hsa-miR-4446 NM_199413 | PRC1 | 1 |
| hsa-miR-548a NM_199413 | PRC1 | 1 |
| hsa-miR-4458 NM_199413 | PRC1 | 1 |
| hsa-miR-447C NM_199413 | PRC1 | 1 |
| hsa-miR-4474 NM_199413 | PRC1 | 1 |
| hsa-miR-4476 NM_199413 | PRC1 | 1 |
| hsa-miR-4478 NM_199413 | PRC1 | 1 |
| hsa-miR-3689 NM_199413 | PRC1 | 1 |
| hsa-miR-548a NM_199413 | PRC1 | 1 |
| hsa-miR-4482 NM_199413 | PRC1 | 1 |
| hsa-miR-4497 NM_199413 | PRC1 | 1 |
| hsa-miR-4498 NM_199413 | PRC1 | 1 |
| hsa-miR-4513 NM_199413 | PRC1 | 1 |
| hsa-miR-4515 NM_199413 | PRC1 | 1 |
| hsa-miR-4518 NM_199413 | PRC1 | 1 |
| hsa-miR-4519 NM_199413 | PRC1 | 1 |
| hsa-miR-4535 NM_199413 | PRC1 | 1 |
| hsa-miR-4538 NM_199413 | PRC1 | 1 |
| hsa-miR-4540 NM_199413 | PRC1 | 1 |
| hsa-miR-396C NM_199413 | PRC1 | 1 |
| hsa-miR-3973 NM_199413 | PRC1 | 1 |
| hsa-miR-3977 NM_199413 | PRC1 | 1 |
| hsa-miR-4635 NM_199413 | PRC1 | 1 |
| hsa-miR-4638 NM_199413 | PRC1 | 1 |
| hsa-miR-4642 NM_199413 | PRC1 | 1 |
| hsa-miR-4646 NM_199413 | PRC1 | 1 |
| hsa-miR-4649 NM_199413 | PRC1 | 1 |
| hsa-miR-4649 NM_199413 | PRC1 | 1 |
| hsa-miR-4651 NM_199413 | PRC1 | 1 |
| hsa-miR-4651 NM_199413 | PRC1 | 1 |
| hsa-miR-4651 NM_199413 | PRC1 | 1 |
| hsa-miR-4654 NM_199413 | PRC1 | 1 |
| hsa-miR-4656 NM_199413 | PRC1 | 1 |
| hsa-miR-4667 NM_199413 | PRC1 | 1 |
| hsa-miR-4687 NM_199413 | PRC1 | 1 |
| hsa-miR-1343 NM_199413 | PRC1 | 1 |
| hsa-miR-4690 NM_199413 | PRC1 | 1 |
| hsa-miR-4691 NM_199413 | PRC1 | 1 |
| hsa-miR-4692 NM_199413 | PRC1 | 1 |
| hsa-miR-4698 NM_199413 | PRC1 | 1 |
| hsa-miR-4701 NM_199413 | PRC1 | 1 |
| hsa-miR-4706 NM_199413 | PRC1 | 1 |

|                        |      |   |
|------------------------|------|---|
| hsa-miR-4707 NM_199413 | PRC1 | 1 |
| hsa-miR-4710 NM_199413 | PRC1 | 1 |
| hsa-miR-3529 NM_199413 | PRC1 | 1 |
| hsa-miR-4723 NM_199413 | PRC1 | 1 |
| hsa-miR-4725 NM_199413 | PRC1 | 1 |
| hsa-miR-4733 NM_199413 | PRC1 | 1 |
| hsa-miR-4734 NM_199413 | PRC1 | 1 |
| hsa-miR-4736 NM_199413 | PRC1 | 1 |
| hsa-miR-4741 NM_199413 | PRC1 | 1 |
| hsa-miR-4743 NM_199413 | PRC1 | 1 |
| hsa-miR-4761 NM_199413 | PRC1 | 1 |
| hsa-miR-4761 NM_199413 | PRC1 | 1 |
| hsa-miR-4436 NM_199413 | PRC1 | 1 |
| hsa-miR-2467 NM_199413 | PRC1 | 1 |
| hsa-miR-4787 NM_199413 | PRC1 | 1 |
| hsa-miR-4794 NM_199413 | PRC1 | 1 |
| hsa-miR-4795 NM_199413 | PRC1 | 1 |
| hsa-miR-4802 NM_199413 | PRC1 | 1 |
| hsa-miR-5004 NM_199413 | PRC1 | 1 |
| hsa-miR-5004 NM_199413 | PRC1 | 1 |
| hsa-miR-5006 NM_199413 | PRC1 | 1 |
| hsa-miR-5010 NM_199413 | PRC1 | 1 |
| hsa-miR-5010 NM_199413 | PRC1 | 1 |
| hsa-miR-5047 NM_199413 | PRC1 | 1 |
| hsa-miR-5088 NM_199413 | PRC1 | 1 |
| hsa-miR-5092 NM_199413 | PRC1 | 1 |
| hsa-miR-548a NM_199413 | PRC1 | 1 |
| hsa-miR-664b NM_199413 | PRC1 | 1 |
| hsa-miR-5584 NM_199413 | PRC1 | 1 |
| hsa-miR-5587 NM_199413 | PRC1 | 1 |
| hsa-miR-1295 NM_199413 | PRC1 | 1 |
| hsa-miR-5585 NM_199413 | PRC1 | 1 |
| hsa-miR-5591 NM_199413 | PRC1 | 1 |
| hsa-miR-5703 NM_199413 | PRC1 | 1 |
| hsa-miR-6081 NM_199413 | PRC1 | 1 |
| hsa-miR-6085 NM_199413 | PRC1 | 1 |
| hsa-miR-6090 NM_199413 | PRC1 | 1 |
| hsa-miR-6124 NM_199413 | PRC1 | 1 |
| hsa-miR-6127 NM_199413 | PRC1 | 1 |
| hsa-miR-6134 NM_199413 | PRC1 | 1 |
| hsa-miR-6165 NM_199413 | PRC1 | 1 |
| hsa-miR-6503 NM_199413 | PRC1 | 1 |
| hsa-miR-6503 NM_199413 | PRC1 | 1 |
| hsa-miR-6506 NM_199413 | PRC1 | 1 |
| hsa-miR-6505 NM_199413 | PRC1 | 1 |
| hsa-miR-6510 NM_199413 | PRC1 | 1 |
| hsa-miR-6510 NM_199413 | PRC1 | 1 |
| hsa-miR-6510 NM_199413 | PRC1 | 1 |
| hsa-miR-6513 NM_199413 | PRC1 | 1 |
| hsa-miR-6514 NM_199413 | PRC1 | 1 |
| hsa-miR-6716 NM_199413 | PRC1 | 1 |
| hsa-miR-6726 NM_199413 | PRC1 | 1 |
| hsa-miR-6730 NM_199413 | PRC1 | 1 |
| hsa-miR-6736 NM_199413 | PRC1 | 1 |
| hsa-miR-6741 NM_199413 | PRC1 | 1 |
| hsa-miR-6742 NM_199413 | PRC1 | 1 |
| hsa-miR-6743 NM_199413 | PRC1 | 1 |
| hsa-miR-6743 NM_199413 | PRC1 | 1 |
| hsa-miR-6745 NM_199413 | PRC1 | 1 |
| hsa-miR-6746 NM_199413 | PRC1 | 1 |
| hsa-miR-6748 NM_199413 | PRC1 | 1 |
| hsa-miR-6745 NM_199413 | PRC1 | 1 |
| hsa-miR-6750 NM_199413 | PRC1 | 1 |
| hsa-miR-6751 NM_199413 | PRC1 | 1 |
| hsa-miR-6755 NM_199413 | PRC1 | 1 |
| hsa-miR-6755 NM_199413 | PRC1 | 1 |
| hsa-miR-6760 NM_199413 | PRC1 | 1 |
| hsa-miR-6762 NM_199413 | PRC1 | 1 |
| hsa-miR-6764 NM_199413 | PRC1 | 1 |
| hsa-miR-6764 NM_199413 | PRC1 | 1 |
| hsa-miR-6766 NM_199413 | PRC1 | 1 |
| hsa-miR-6767 NM_199413 | PRC1 | 1 |
| hsa-miR-6765 NM_199413 | PRC1 | 1 |
| hsa-miR-6765 NM_199413 | PRC1 | 1 |
| hsa-miR-6770 NM_199413 | PRC1 | 1 |
| hsa-miR-6772 NM_199413 | PRC1 | 1 |
| hsa-miR-6773 NM_199413 | PRC1 | 1 |
| hsa-miR-6773 NM_199413 | PRC1 | 1 |
| hsa-miR-6777 NM_199413 | PRC1 | 1 |
| hsa-miR-6777 NM_199413 | PRC1 | 1 |
| hsa-miR-6784 NM_199413 | PRC1 | 1 |
| hsa-miR-6785 NM_199413 | PRC1 | 1 |
| hsa-miR-6786 NM_199413 | PRC1 | 1 |
| hsa-miR-6787 NM_199413 | PRC1 | 1 |
| hsa-miR-6789 NM_199413 | PRC1 | 1 |
| hsa-miR-6789 NM_199413 | PRC1 | 1 |
| hsa-miR-6792 NM_199413 | PRC1 | 1 |
| hsa-miR-6793 NM_199413 | PRC1 | 1 |
| hsa-miR-6794 NM_199413 | PRC1 | 1 |
| hsa-miR-6795 NM_199413 | PRC1 | 1 |
| hsa-miR-6796 NM_199413 | PRC1 | 1 |
| hsa-miR-6798 NM_199413 | PRC1 | 1 |
| hsa-miR-6799 NM_199413 | PRC1 | 1 |
| hsa-miR-6799 NM_199413 | PRC1 | 1 |

|                         |      |   |
|-------------------------|------|---|
| hsa-miR-6800 NM_199413  | PRC1 | 1 |
| hsa-miR-6801 NM_199413  | PRC1 | 1 |
| hsa-miR-6803 NM_199413  | PRC1 | 1 |
| hsa-miR-6810 NM_199413  | PRC1 | 1 |
| hsa-miR-6812 NM_199413  | PRC1 | 1 |
| hsa-miR-6814 NM_199413  | PRC1 | 1 |
| hsa-miR-6818 NM_199413  | PRC1 | 1 |
| hsa-miR-6819 NM_199413  | PRC1 | 1 |
| hsa-miR-6823 NM_199413  | PRC1 | 1 |
| hsa-miR-6825 NM_199413  | PRC1 | 1 |
| hsa-miR-6829 NM_199413  | PRC1 | 1 |
| hsa-miR-6830 NM_199413  | PRC1 | 1 |
| hsa-miR-6831 NM_199413  | PRC1 | 1 |
| hsa-miR-6831 NM_199413  | PRC1 | 1 |
| hsa-miR-6832 NM_199413  | PRC1 | 1 |
| hsa-miR-6832 NM_199413  | PRC1 | 1 |
| hsa-miR-6833 NM_199413  | PRC1 | 1 |
| hsa-miR-6833 NM_199413  | PRC1 | 1 |
| hsa-miR-6834 NM_199413  | PRC1 | 1 |
| hsa-miR-6835 NM_199413  | PRC1 | 1 |
| hsa-miR-6840 NM_199413  | PRC1 | 1 |
| hsa-miR-6842 NM_199413  | PRC1 | 1 |
| hsa-miR-6842 NM_199413  | PRC1 | 1 |
| hsa-miR-6846 NM_199413  | PRC1 | 1 |
| hsa-miR-6847 NM_199413  | PRC1 | 1 |
| hsa-miR-6848 NM_199413  | PRC1 | 1 |
| hsa-miR-6851 NM_199413  | PRC1 | 1 |
| hsa-miR-6857 NM_199413  | PRC1 | 1 |
| hsa-miR-6858 NM_199413  | PRC1 | 1 |
| hsa-miR-6765 NM_199413  | PRC1 | 1 |
| hsa-miR-6860 NM_199413  | PRC1 | 1 |
| hsa-miR-6862 NM_199413  | PRC1 | 1 |
| hsa-miR-6867 NM_199413  | PRC1 | 1 |
| hsa-miR-6870 NM_199413  | PRC1 | 1 |
| hsa-miR-6872 NM_199413  | PRC1 | 1 |
| hsa-miR-6873 NM_199413  | PRC1 | 1 |
| hsa-miR-6879 NM_199413  | PRC1 | 1 |
| hsa-miR-6879 NM_199413  | PRC1 | 1 |
| hsa-miR-6883 NM_199413  | PRC1 | 1 |
| hsa-miR-6883 NM_199413  | PRC1 | 1 |
| hsa-miR-6885 NM_199413  | PRC1 | 1 |
| hsa-miR-6887 NM_199413  | PRC1 | 1 |
| hsa-miR-6888 NM_199413  | PRC1 | 1 |
| hsa-miR-6893 NM_199413  | PRC1 | 1 |
| hsa-miR-6893 NM_199413  | PRC1 | 1 |
| hsa-miR-7106 NM_199413  | PRC1 | 1 |
| hsa-miR-7111 NM_199413  | PRC1 | 1 |
| hsa-miR-7112 NM_199413  | PRC1 | 1 |
| hsa-miR-7114 NM_199413  | PRC1 | 1 |
| hsa-miR-7153 NM_199413  | PRC1 | 1 |
| hsa-miR-7155 NM_199413  | PRC1 | 1 |
| hsa-miR-7158 NM_199413  | PRC1 | 1 |
| hsa-miR-7162 NM_199413  | PRC1 | 1 |
| hsa-miR-7702 NM_199413  | PRC1 | 1 |
| hsa-miR-7843 NM_199413  | PRC1 | 1 |
| hsa-miR-1273 NM_199413  | PRC1 | 1 |
| hsa-miR-1273 NM_199413  | PRC1 | 1 |
| hsa-miR-6516 NM_199413  | PRC1 | 1 |
| hsa-miR-7845 NM_199413  | PRC1 | 1 |
| hsa-miR-7846 NM_199413  | PRC1 | 1 |
| hsa-miR-7847 NM_199413  | PRC1 | 1 |
| hsa-miR-7855 NM_199413  | PRC1 | 1 |
| hsa-miR-548t NM_199413  | PRC1 | 1 |
| hsa-miR-8053 NM_199413  | PRC1 | 1 |
| hsa-miR-8072 NM_199413  | PRC1 | 1 |
| hsa-miR-8075 NM_199413  | PRC1 | 1 |
| hsa-miR-8083 NM_199413  | PRC1 | 1 |
| hsa-miR-8085 NM_199413  | PRC1 | 1 |
| hsa-miR-9718 NM_199413  | PRC1 | 1 |
| hsa-miR-1035 NM_199413  | PRC1 | 1 |
| hsa-miR-3055 NM_199413  | PRC1 | 1 |
| hsa-miR-1211 NM_199413  | PRC1 | 1 |
| hsa-miR-1211 NM_199413  | PRC1 | 1 |
| hsa-miR-1212 NM_199413  | PRC1 | 1 |
| hsa-let-7b-5p NM_003981 | PRC1 | 1 |
| hsa-let-7e-3p NM_003981 | PRC1 | 1 |
| hsa-miR-15a- NM_003981  | PRC1 | 1 |
| hsa-miR-16-1- NM_003981 | PRC1 | 1 |
| hsa-miR-22-5j NM_003981 | PRC1 | 1 |
| hsa-miR-22-3j NM_003981 | PRC1 | 1 |
| hsa-miR-23a- NM_003981  | PRC1 | 1 |
| hsa-miR-25-5j NM_003981 | PRC1 | 1 |
| hsa-miR-92a- NM_003981  | PRC1 | 1 |
| hsa-miR-93-3j NM_003981 | PRC1 | 1 |
| hsa-miR-103a NM_003981  | PRC1 | 1 |
| hsa-miR-107 NM_003981   | PRC1 | 1 |
| hsa-miR-192- NM_003981  | PRC1 | 1 |
| hsa-miR-197- NM_003981  | PRC1 | 1 |
| hsa-miR-208a NM_003981  | PRC1 | 1 |
| hsa-miR-7-2-3 NM_003981 | PRC1 | 1 |
| hsa-miR-204- NM_003981  | PRC1 | 1 |
| hsa-miR-210- NM_003981  | PRC1 | 1 |
| hsa-miR-211- NM_003981  | PRC1 | 1 |
| hsa-miR-214- NM_003981  | PRC1 | 1 |
| hsa-miR-216a NM_003981  | PRC1 | 1 |

|                        |      |   |
|------------------------|------|---|
| hsa-miR-223- NM_003981 | PRC1 | 1 |
| hsa-miR-224- NM_003981 | PRC1 | 1 |
| hsa-miR-27b- NM_003981 | PRC1 | 1 |
| hsa-miR-124- NM_003981 | PRC1 | 1 |
| hsa-miR-125t NM_003981 | PRC1 | 1 |
| hsa-miR-125t NM_003981 | PRC1 | 1 |
| hsa-miR-125t NM_003981 | PRC1 | 1 |
| hsa-miR-132- NM_003981 | PRC1 | 1 |
| hsa-miR-138- NM_003981 | PRC1 | 1 |
| hsa-miR-145- NM_003981 | PRC1 | 1 |
| hsa-miR-153- NM_003981 | PRC1 | 1 |
| hsa-miR-191- NM_003981 | PRC1 | 1 |
| hsa-miR-125a NM_003981 | PRC1 | 1 |
| hsa-miR-125t NM_003981 | PRC1 | 1 |
| hsa-miR-188- NM_003981 | PRC1 | 1 |
| hsa-miR-188- NM_003981 | PRC1 | 1 |
| hsa-miR-193a NM_003981 | PRC1 | 1 |
| hsa-miR-194- NM_003981 | PRC1 | 1 |
| hsa-miR-106b NM_003981 | PRC1 | 1 |
| hsa-miR-29c- NM_003981 | PRC1 | 1 |
| hsa-miR-30c- NM_003981 | PRC1 | 1 |
| hsa-miR-219a NM_003981 | PRC1 | 1 |
| hsa-miR-370- NM_003981 | PRC1 | 1 |
| hsa-miR-328- NM_003981 | PRC1 | 1 |
| hsa-miR-331- NM_003981 | PRC1 | 1 |
| hsa-miR-423- NM_003981 | PRC1 | 1 |
| hsa-miR-423- NM_003981 | PRC1 | 1 |
| hsa-miR-449a NM_003981 | PRC1 | 1 |
| hsa-miR-412- NM_003981 | PRC1 | 1 |
| hsa-miR-202- NM_003981 | PRC1 | 1 |
| hsa-miR-432- NM_003981 | PRC1 | 1 |
| hsa-miR-193b NM_003981 | PRC1 | 1 |
| hsa-miR-519c NM_003981 | PRC1 | 1 |
| hsa-miR-519t NM_003981 | PRC1 | 1 |
| hsa-miR-523- NM_003981 | PRC1 | 1 |
| hsa-miR-518f NM_003981 | PRC1 | 1 |
| hsa-miR-526a NM_003981 | PRC1 | 1 |
| hsa-miR-520c NM_003981 | PRC1 | 1 |
| hsa-miR-524- NM_003981 | PRC1 | 1 |
| hsa-miR-521 NM_003981  | PRC1 | 1 |
| hsa-miR-520d NM_003981 | PRC1 | 1 |
| hsa-miR-520g NM_003981 | PRC1 | 1 |
| hsa-miR-520g NM_003981 | PRC1 | 1 |
| hsa-miR-516t NM_003981 | PRC1 | 1 |
| hsa-miR-518e NM_003981 | PRC1 | 1 |
| hsa-miR-518d NM_003981 | PRC1 | 1 |
| hsa-miR-522- NM_003981 | PRC1 | 1 |
| hsa-miR-519a NM_003981 | PRC1 | 1 |
| hsa-miR-516a NM_003981 | PRC1 | 1 |
| hsa-miR-501- NM_003981 | PRC1 | 1 |
| hsa-miR-450a NM_003981 | PRC1 | 1 |
| hsa-miR-503- NM_003981 | PRC1 | 1 |
| hsa-miR-504- NM_003981 | PRC1 | 1 |
| hsa-miR-504- NM_003981 | PRC1 | 1 |
| hsa-miR-506- NM_003981 | PRC1 | 1 |
| hsa-miR-506- NM_003981 | PRC1 | 1 |
| hsa-miR-509- NM_003981 | PRC1 | 1 |
| hsa-miR-539- NM_003981 | PRC1 | 1 |
| hsa-miR-557 NM_003981  | PRC1 | 1 |
| hsa-miR-575 NM_003981  | PRC1 | 1 |
| hsa-miR-575 NM_003981  | PRC1 | 1 |
| hsa-miR-576- NM_003981 | PRC1 | 1 |
| hsa-miR-583 NM_003981  | PRC1 | 1 |
| hsa-miR-584- NM_003981 | PRC1 | 1 |
| hsa-miR-589- NM_003981 | PRC1 | 1 |
| hsa-miR-601 NM_003981  | PRC1 | 1 |
| hsa-miR-602 NM_003981  | PRC1 | 1 |
| hsa-miR-610 NM_003981  | PRC1 | 1 |
| hsa-miR-629- NM_003981 | PRC1 | 1 |
| hsa-miR-641 NM_003981  | PRC1 | 1 |
| hsa-miR-652- NM_003981 | PRC1 | 1 |
| hsa-miR-449t NM_003981 | PRC1 | 1 |
| hsa-miR-656- NM_003981 | PRC1 | 1 |
| hsa-miR-658 NM_003981  | PRC1 | 1 |
| hsa-miR-671- NM_003981 | PRC1 | 1 |
| hsa-miR-668- NM_003981 | PRC1 | 1 |
| hsa-miR-1224 NM_003981 | PRC1 | 1 |
| hsa-miR-320b NM_003981 | PRC1 | 1 |
| hsa-miR-320b NM_003981 | PRC1 | 1 |
| hsa-miR-320c NM_003981 | PRC1 | 1 |
| hsa-miR-449c NM_003981 | PRC1 | 1 |
| hsa-miR-1298 NM_003981 | PRC1 | 1 |
| hsa-miR-770- NM_003981 | PRC1 | 1 |
| hsa-miR-675- NM_003981 | PRC1 | 1 |
| hsa-miR-888- NM_003981 | PRC1 | 1 |
| hsa-miR-744- NM_003981 | PRC1 | 1 |
| hsa-miR-885- NM_003981 | PRC1 | 1 |
| hsa-miR-877- NM_003981 | PRC1 | 1 |
| hsa-miR-665 NM_003981  | PRC1 | 1 |
| hsa-miR-760 NM_003981  | PRC1 | 1 |
| hsa-miR-301b NM_003981 | PRC1 | 1 |
| hsa-miR-920 NM_003981  | PRC1 | 1 |
| hsa-miR-939- NM_003981 | PRC1 | 1 |
| hsa-miR-941 NM_003981  | PRC1 | 1 |
| hsa-miR-1182 NM_003981 | PRC1 | 1 |

|                        |      |   |
|------------------------|------|---|
| hsa-miR-1225 NM_003981 | PRC1 | 1 |
| hsa-miR-1227 NM_003981 | PRC1 | 1 |
| hsa-miR-1228 NM_003981 | PRC1 | 1 |
| hsa-miR-1225 NM_003981 | PRC1 | 1 |
| hsa-miR-1231 NM_003981 | PRC1 | 1 |
| hsa-miR-1233 NM_003981 | PRC1 | 1 |
| hsa-miR-1237 NM_003981 | PRC1 | 1 |
| hsa-miR-1238 NM_003981 | PRC1 | 1 |
| hsa-miR-1203 NM_003981 | PRC1 | 1 |
| hsa-miR-663b NM_003981 | PRC1 | 1 |
| hsa-miR-1204 NM_003981 | PRC1 | 1 |
| hsa-miR-1207 NM_003981 | PRC1 | 1 |
| hsa-miR-1208 NM_003981 | PRC1 | 1 |
| hsa-miR-1246 NM_003981 | PRC1 | 1 |
| hsa-miR-1245 NM_003981 | PRC1 | 1 |
| hsa-miR-1258 NM_003981 | PRC1 | 1 |
| hsa-miR-1261 NM_003981 | PRC1 | 1 |
| hsa-miR-1268 NM_003981 | PRC1 | 1 |
| hsa-miR-1275 NM_003981 | PRC1 | 1 |
| hsa-miR-1275 NM_003981 | PRC1 | 1 |
| hsa-miR-548i NM_003981 | PRC1 | 1 |
| hsa-miR-664a NM_003981 | PRC1 | 1 |
| hsa-miR-1306 NM_003981 | PRC1 | 1 |
| hsa-miR-513b NM_003981 | PRC1 | 1 |
| hsa-miR-1321 NM_003981 | PRC1 | 1 |
| hsa-miR-1908 NM_003981 | PRC1 | 1 |
| hsa-miR-1908 NM_003981 | PRC1 | 1 |
| hsa-miR-191C NM_003981 | PRC1 | 1 |
| hsa-miR-2114 NM_003981 | PRC1 | 1 |
| hsa-miR-2115 NM_003981 | PRC1 | 1 |
| hsa-miR-2116 NM_003981 | PRC1 | 1 |
| hsa-miR-2861 NM_003981 | PRC1 | 1 |
| hsa-miR-2861 NM_003981 | PRC1 | 1 |
| hsa-miR-2905 NM_003981 | PRC1 | 1 |
| hsa-miR-312C NM_003981 | PRC1 | 1 |
| hsa-miR-3126 NM_003981 | PRC1 | 1 |
| hsa-miR-3127 NM_003981 | PRC1 | 1 |
| hsa-miR-3132 NM_003981 | PRC1 | 1 |
| hsa-miR-3135 NM_003981 | PRC1 | 1 |
| hsa-miR-3135 NM_003981 | PRC1 | 1 |
| hsa-miR-3142 NM_003981 | PRC1 | 1 |
| hsa-miR-3176 NM_003981 | PRC1 | 1 |
| hsa-miR-548v NM_003981 | PRC1 | 1 |
| hsa-miR-3187 NM_003981 | PRC1 | 1 |
| hsa-miR-319C NM_003981 | PRC1 | 1 |
| hsa-miR-3191 NM_003981 | PRC1 | 1 |
| hsa-miR-3198 NM_003981 | PRC1 | 1 |
| hsa-miR-3195 NM_003981 | PRC1 | 1 |
| hsa-miR-514b NM_003981 | PRC1 | 1 |
| hsa-miR-4296 NM_003981 | PRC1 | 1 |
| hsa-miR-4296 NM_003981 | PRC1 | 1 |
| hsa-miR-4298 NM_003981 | PRC1 | 1 |
| hsa-miR-4302 NM_003981 | PRC1 | 1 |
| hsa-miR-4257 NM_003981 | PRC1 | 1 |
| hsa-miR-4259 NM_003981 | PRC1 | 1 |
| hsa-miR-4266 NM_003981 | PRC1 | 1 |
| hsa-miR-4265 NM_003981 | PRC1 | 1 |
| hsa-miR-4271 NM_003981 | PRC1 | 1 |
| hsa-miR-4281 NM_003981 | PRC1 | 1 |
| hsa-miR-4285 NM_003981 | PRC1 | 1 |
| hsa-miR-3615 NM_003981 | PRC1 | 1 |
| hsa-miR-3622 NM_003981 | PRC1 | 1 |
| hsa-miR-3646 NM_003981 | PRC1 | 1 |
| hsa-miR-3648 NM_003981 | PRC1 | 1 |
| hsa-miR-3654 NM_003981 | PRC1 | 1 |
| hsa-miR-3664 NM_003981 | PRC1 | 1 |
| hsa-miR-3665 NM_003981 | PRC1 | 1 |
| hsa-miR-3677 NM_003981 | PRC1 | 1 |
| hsa-miR-3691 NM_003981 | PRC1 | 1 |
| hsa-miR-3714 NM_003981 | PRC1 | 1 |
| hsa-miR-3911 NM_003981 | PRC1 | 1 |
| hsa-miR-315C NM_003981 | PRC1 | 1 |
| hsa-miR-315C NM_003981 | PRC1 | 1 |
| hsa-miR-3926 NM_003981 | PRC1 | 1 |
| hsa-miR-3934 NM_003981 | PRC1 | 1 |
| hsa-miR-3934 NM_003981 | PRC1 | 1 |
| hsa-miR-3945 NM_003981 | PRC1 | 1 |
| hsa-miR-1268 NM_003981 | PRC1 | 1 |
| hsa-miR-443C NM_003981 | PRC1 | 1 |
| hsa-miR-4433 NM_003981 | PRC1 | 1 |
| hsa-miR-4437 NM_003981 | PRC1 | 1 |
| hsa-miR-444C NM_003981 | PRC1 | 1 |
| hsa-miR-4446 NM_003981 | PRC1 | 1 |
| hsa-miR-548a NM_003981 | PRC1 | 1 |
| hsa-miR-4458 NM_003981 | PRC1 | 1 |
| hsa-miR-447C NM_003981 | PRC1 | 1 |
| hsa-miR-4474 NM_003981 | PRC1 | 1 |
| hsa-miR-4476 NM_003981 | PRC1 | 1 |
| hsa-miR-4478 NM_003981 | PRC1 | 1 |
| hsa-miR-3685 NM_003981 | PRC1 | 1 |
| hsa-miR-548a NM_003981 | PRC1 | 1 |
| hsa-miR-4482 NM_003981 | PRC1 | 1 |
| hsa-miR-4497 NM_003981 | PRC1 | 1 |
| hsa-miR-4498 NM_003981 | PRC1 | 1 |

|                        |      |   |
|------------------------|------|---|
| hsa-miR-4513 NM_003981 | PRC1 | 1 |
| hsa-miR-4515 NM_003981 | PRC1 | 1 |
| hsa-miR-4518 NM_003981 | PRC1 | 1 |
| hsa-miR-4519 NM_003981 | PRC1 | 1 |
| hsa-miR-4535 NM_003981 | PRC1 | 1 |
| hsa-miR-4538 NM_003981 | PRC1 | 1 |
| hsa-miR-454C NM_003981 | PRC1 | 1 |
| hsa-miR-396C NM_003981 | PRC1 | 1 |
| hsa-miR-3973 NM_003981 | PRC1 | 1 |
| hsa-miR-3977 NM_003981 | PRC1 | 1 |
| hsa-miR-4635 NM_003981 | PRC1 | 1 |
| hsa-miR-4638 NM_003981 | PRC1 | 1 |
| hsa-miR-4642 NM_003981 | PRC1 | 1 |
| hsa-miR-4646 NM_003981 | PRC1 | 1 |
| hsa-miR-4649 NM_003981 | PRC1 | 1 |
| hsa-miR-4649 NM_003981 | PRC1 | 1 |
| hsa-miR-4651 NM_003981 | PRC1 | 1 |
| hsa-miR-4651 NM_003981 | PRC1 | 1 |
| hsa-miR-4651 NM_003981 | PRC1 | 1 |
| hsa-miR-4654 NM_003981 | PRC1 | 1 |
| hsa-miR-4656 NM_003981 | PRC1 | 1 |
| hsa-miR-4667 NM_003981 | PRC1 | 1 |
| hsa-miR-4687 NM_003981 | PRC1 | 1 |
| hsa-miR-1343 NM_003981 | PRC1 | 1 |
| hsa-miR-469C NM_003981 | PRC1 | 1 |
| hsa-miR-4691 NM_003981 | PRC1 | 1 |
| hsa-miR-4692 NM_003981 | PRC1 | 1 |
| hsa-miR-4698 NM_003981 | PRC1 | 1 |
| hsa-miR-4701 NM_003981 | PRC1 | 1 |
| hsa-miR-4706 NM_003981 | PRC1 | 1 |
| hsa-miR-4707 NM_003981 | PRC1 | 1 |
| hsa-miR-471C NM_003981 | PRC1 | 1 |
| hsa-miR-3529 NM_003981 | PRC1 | 1 |
| hsa-miR-4723 NM_003981 | PRC1 | 1 |
| hsa-miR-4725 NM_003981 | PRC1 | 1 |
| hsa-miR-4733 NM_003981 | PRC1 | 1 |
| hsa-miR-4734 NM_003981 | PRC1 | 1 |
| hsa-miR-4736 NM_003981 | PRC1 | 1 |
| hsa-miR-4741 NM_003981 | PRC1 | 1 |
| hsa-miR-4743 NM_003981 | PRC1 | 1 |
| hsa-miR-4758 NM_003981 | PRC1 | 1 |
| hsa-miR-4761 NM_003981 | PRC1 | 1 |
| hsa-miR-4761 NM_003981 | PRC1 | 1 |
| hsa-miR-4436 NM_003981 | PRC1 | 1 |
| hsa-miR-2467 NM_003981 | PRC1 | 1 |
| hsa-miR-4787 NM_003981 | PRC1 | 1 |
| hsa-miR-4794 NM_003981 | PRC1 | 1 |
| hsa-miR-4795 NM_003981 | PRC1 | 1 |
| hsa-miR-4802 NM_003981 | PRC1 | 1 |
| hsa-miR-5004 NM_003981 | PRC1 | 1 |
| hsa-miR-5004 NM_003981 | PRC1 | 1 |
| hsa-miR-5006 NM_003981 | PRC1 | 1 |
| hsa-miR-501C NM_003981 | PRC1 | 1 |
| hsa-miR-5047 NM_003981 | PRC1 | 1 |
| hsa-miR-5088 NM_003981 | PRC1 | 1 |
| hsa-miR-5092 NM_003981 | PRC1 | 1 |
| hsa-miR-548a NM_003981 | PRC1 | 1 |
| hsa-miR-664b NM_003981 | PRC1 | 1 |
| hsa-miR-5584 NM_003981 | PRC1 | 1 |
| hsa-miR-5587 NM_003981 | PRC1 | 1 |
| hsa-miR-1295 NM_003981 | PRC1 | 1 |
| hsa-miR-5585 NM_003981 | PRC1 | 1 |
| hsa-miR-5591 NM_003981 | PRC1 | 1 |
| hsa-miR-5703 NM_003981 | PRC1 | 1 |
| hsa-miR-6081 NM_003981 | PRC1 | 1 |
| hsa-miR-6085 NM_003981 | PRC1 | 1 |
| hsa-miR-609C NM_003981 | PRC1 | 1 |
| hsa-miR-6124 NM_003981 | PRC1 | 1 |
| hsa-miR-6127 NM_003981 | PRC1 | 1 |
| hsa-miR-6134 NM_003981 | PRC1 | 1 |
| hsa-miR-6165 NM_003981 | PRC1 | 1 |
| hsa-miR-6503 NM_003981 | PRC1 | 1 |
| hsa-miR-6503 NM_003981 | PRC1 | 1 |
| hsa-miR-6506 NM_003981 | PRC1 | 1 |
| hsa-miR-6509 NM_003981 | PRC1 | 1 |
| hsa-miR-651C NM_003981 | PRC1 | 1 |
| hsa-miR-651C NM_003981 | PRC1 | 1 |
| hsa-miR-6513 NM_003981 | PRC1 | 1 |
| hsa-miR-6514 NM_003981 | PRC1 | 1 |
| hsa-miR-6716 NM_003981 | PRC1 | 1 |
| hsa-miR-6726 NM_003981 | PRC1 | 1 |
| hsa-miR-673C NM_003981 | PRC1 | 1 |
| hsa-miR-6736 NM_003981 | PRC1 | 1 |
| hsa-miR-6741 NM_003981 | PRC1 | 1 |
| hsa-miR-6742 NM_003981 | PRC1 | 1 |
| hsa-miR-6743 NM_003981 | PRC1 | 1 |
| hsa-miR-6743 NM_003981 | PRC1 | 1 |
| hsa-miR-6745 NM_003981 | PRC1 | 1 |
| hsa-miR-6746 NM_003981 | PRC1 | 1 |
| hsa-miR-6748 NM_003981 | PRC1 | 1 |
| hsa-miR-6749 NM_003981 | PRC1 | 1 |
| hsa-miR-675C NM_003981 | PRC1 | 1 |
| hsa-miR-6751 NM_003981 | PRC1 | 1 |
| hsa-miR-6759 NM_003981 | PRC1 | 1 |





|              |            |       |            |
|--------------|------------|-------|------------|
| hsa-miR-8089 | NM_003981  | PRC1  | 1          |
| hsa-miR-9718 | NM_003981  | PRC1  | 1          |
| hsa-miR-1039 | NM_003981  | PRC1  | 1          |
| hsa-miR-3059 | NM_003981  | PRC1  | 1          |
| hsa-miR-1211 | NM_003981  | PRC1  | 1          |
| hsa-miR-1211 | NM_003981  | PRC1  | 1          |
| hsa-miR-1212 | NM_003981  | PRC1  | 1          |
| hsa-miR-18b- | NM_138555  | KIF23 | 0.96153846 |
| hsa-miR-3187 | NM_138555  | KIF23 | 0.96153846 |
| hsa-miR-4524 | NM_138555  | KIF23 | 0.96153846 |
| hsa-miR-6756 | NM_138555  | KIF23 | 0.96153846 |
| hsa-miR-18b- | XM_0052547 | KIF23 | 0.96153846 |
| hsa-miR-3187 | XM_0052547 | KIF23 | 0.96153846 |
| hsa-miR-4450 | XM_0052547 | KIF23 | 0.96153846 |
| hsa-miR-4534 | XM_0052547 | KIF23 | 0.96153846 |
| hsa-miR-6756 | XM_0052547 | KIF23 | 0.96153846 |
| hsa-miR-18b- | NM_004856  | KIF23 | 0.96153846 |
| hsa-miR-3187 | NM_004856  | KIF23 | 0.96153846 |
| hsa-miR-4450 | NM_004856  | KIF23 | 0.96153846 |
| hsa-miR-4524 | NM_004856  | KIF23 | 0.96153846 |
| hsa-miR-6756 | NM_004856  | KIF23 | 0.96153846 |
| hsa-miR-4788 | NM_138555  | KIF23 | 0.97435897 |
| hsa-miR-6495 | XM_0052547 | KIF23 | 0.97435897 |
| hsa-miR-4788 | NM_004856  | KIF23 | 0.97435897 |
| hsa-miR-208a | NM_138555  | KIF23 | 1          |
| hsa-miR-147a | NM_138555  | KIF23 | 1          |
| hsa-miR-182- | NM_138555  | KIF23 | 1          |
| hsa-miR-132- | NM_138555  | KIF23 | 1          |
| hsa-miR-150- | NM_138555  | KIF23 | 1          |
| hsa-miR-34c- | NM_138555  | KIF23 | 1          |
| hsa-miR-362- | NM_138555  | KIF23 | 1          |
| hsa-miR-370- | NM_138555  | KIF23 | 1          |
| hsa-miR-449a | NM_138555  | KIF23 | 1          |
| hsa-miR-490- | NM_138555  | KIF23 | 1          |
| hsa-miR-181d | NM_138555  | KIF23 | 1          |
| hsa-miR-591  | NM_138555  | KIF23 | 1          |
| hsa-miR-604  | NM_138555  | KIF23 | 1          |
| hsa-miR-619- | NM_138555  | KIF23 | 1          |
| hsa-miR-642a | NM_138555  | KIF23 | 1          |
| hsa-miR-644a | NM_138555  | KIF23 | 1          |
| hsa-miR-449b | NM_138555  | KIF23 | 1          |
| hsa-miR-542- | NM_138555  | KIF23 | 1          |
| hsa-miR-675- | NM_138555  | KIF23 | 1          |
| hsa-miR-760  | NM_138555  | KIF23 | 1          |
| hsa-miR-937- | NM_138555  | KIF23 | 1          |
| hsa-miR-937- | NM_138555  | KIF23 | 1          |
| hsa-miR-1244 | NM_138555  | KIF23 | 1          |
| hsa-miR-1250 | NM_138555  | KIF23 | 1          |
| hsa-miR-1251 | NM_138555  | KIF23 | 1          |
| hsa-miR-1266 | NM_138555  | KIF23 | 1          |
| hsa-miR-1288 | NM_138555  | KIF23 | 1          |
| hsa-miR-1972 | NM_138555  | KIF23 | 1          |
| hsa-miR-711  | NM_138555  | KIF23 | 1          |
| hsa-miR-3126 | NM_138555  | KIF23 | 1          |
| hsa-miR-3140 | NM_138555  | KIF23 | 1          |
| hsa-miR-3157 | NM_138555  | KIF23 | 1          |
| hsa-miR-3169 | NM_138555  | KIF23 | 1          |
| hsa-miR-3175 | NM_138555  | KIF23 | 1          |
| hsa-miR-3185 | NM_138555  | KIF23 | 1          |
| hsa-miR-3202 | NM_138555  | KIF23 | 1          |
| hsa-miR-3661 | NM_138555  | KIF23 | 1          |
| hsa-miR-3688 | NM_138555  | KIF23 | 1          |
| hsa-miR-3945 | NM_138555  | KIF23 | 1          |
| hsa-miR-4432 | NM_138555  | KIF23 | 1          |
| hsa-miR-4446 | NM_138555  | KIF23 | 1          |
| hsa-miR-4450 | NM_138555  | KIF23 | 1          |
| hsa-miR-3135 | NM_138555  | KIF23 | 1          |
| hsa-miR-4463 | NM_138555  | KIF23 | 1          |
| hsa-miR-4465 | NM_138555  | KIF23 | 1          |
| hsa-miR-4494 | NM_138555  | KIF23 | 1          |
| hsa-miR-4513 | NM_138555  | KIF23 | 1          |
| hsa-miR-4529 | NM_138555  | KIF23 | 1          |
| hsa-miR-4657 | NM_138555  | KIF23 | 1          |
| hsa-miR-4669 | NM_138555  | KIF23 | 1          |
| hsa-miR-4675 | NM_138555  | KIF23 | 1          |
| hsa-miR-4725 | NM_138555  | KIF23 | 1          |
| hsa-miR-4747 | NM_138555  | KIF23 | 1          |
| hsa-miR-4754 | NM_138555  | KIF23 | 1          |
| hsa-miR-4764 | NM_138555  | KIF23 | 1          |
| hsa-miR-4436 | NM_138555  | KIF23 | 1          |
| hsa-miR-4786 | NM_138555  | KIF23 | 1          |
| hsa-miR-4524 | NM_138555  | KIF23 | 1          |
| hsa-miR-5694 | NM_138555  | KIF23 | 1          |
| hsa-miR-5703 | NM_138555  | KIF23 | 1          |
| hsa-miR-6085 | NM_138555  | KIF23 | 1          |
| hsa-miR-378j | NM_138555  | KIF23 | 1          |
| hsa-miR-6499 | NM_138555  | KIF23 | 1          |
| hsa-miR-6501 | NM_138555  | KIF23 | 1          |
| hsa-miR-6510 | NM_138555  | KIF23 | 1          |
| hsa-miR-6511 | NM_138555  | KIF23 | 1          |
| hsa-miR-6730 | NM_138555  | KIF23 | 1          |
| hsa-miR-6740 | NM_138555  | KIF23 | 1          |
| hsa-miR-6746 | NM_138555  | KIF23 | 1          |
| hsa-miR-6749 | NM_138555  | KIF23 | 1          |

|                         |       |   |
|-------------------------|-------|---|
| hsa-miR-6757 NM_138555  | KIF23 | 1 |
| hsa-miR-6763 NM_138555  | KIF23 | 1 |
| hsa-miR-6764 NM_138555  | KIF23 | 1 |
| hsa-miR-6767 NM_138555  | KIF23 | 1 |
| hsa-miR-6772 NM_138555  | KIF23 | 1 |
| hsa-miR-6776 NM_138555  | KIF23 | 1 |
| hsa-miR-6780 NM_138555  | KIF23 | 1 |
| hsa-miR-6784 NM_138555  | KIF23 | 1 |
| hsa-miR-6784 NM_138555  | KIF23 | 1 |
| hsa-miR-6795 NM_138555  | KIF23 | 1 |
| hsa-miR-6807 NM_138555  | KIF23 | 1 |
| hsa-miR-6815 NM_138555  | KIF23 | 1 |
| hsa-miR-6815 NM_138555  | KIF23 | 1 |
| hsa-miR-6820 NM_138555  | KIF23 | 1 |
| hsa-miR-6823 NM_138555  | KIF23 | 1 |
| hsa-miR-6824 NM_138555  | KIF23 | 1 |
| hsa-miR-6829 NM_138555  | KIF23 | 1 |
| hsa-miR-6846 NM_138555  | KIF23 | 1 |
| hsa-miR-6769 NM_138555  | KIF23 | 1 |
| hsa-miR-6875 NM_138555  | KIF23 | 1 |
| hsa-miR-6883 NM_138555  | KIF23 | 1 |
| hsa-miR-7160 NM_138555  | KIF23 | 1 |
| hsa-miR-1139 NM_138555  | KIF23 | 1 |
| hsa-miR-1139 NM_138555  | KIF23 | 1 |
| hsa-miR-1211 NM_138555  | KIF23 | 1 |
| hsa-miR-1212 NM_138555  | KIF23 | 1 |
| hsa-miR-1212 NM_138555  | KIF23 | 1 |
| hsa-miR-208a XM_0052547 | KIF23 | 1 |
| hsa-miR-182 XM_0052547  | KIF23 | 1 |
| hsa-miR-185 XM_0052547  | KIF23 | 1 |
| hsa-miR-320a XM_0052547 | KIF23 | 1 |
| hsa-miR-34c XM_0052547  | KIF23 | 1 |
| hsa-miR-362 XM_0052547  | KIF23 | 1 |
| hsa-miR-370 XM_0052547  | KIF23 | 1 |
| hsa-miR-449a XM_0052547 | KIF23 | 1 |
| hsa-miR-490 XM_0052547  | KIF23 | 1 |
| hsa-miR-181c XM_0052547 | KIF23 | 1 |
| hsa-miR-512 XM_0052547  | KIF23 | 1 |
| hsa-miR-519c XM_0052547 | KIF23 | 1 |
| hsa-miR-591 XM_0052547  | KIF23 | 1 |
| hsa-miR-619 XM_0052547  | KIF23 | 1 |
| hsa-miR-642a XM_0052547 | KIF23 | 1 |
| hsa-miR-644a XM_0052547 | KIF23 | 1 |
| hsa-miR-449b XM_0052547 | KIF23 | 1 |
| hsa-miR-542 XM_0052547  | KIF23 | 1 |
| hsa-miR-760 XM_0052547  | KIF23 | 1 |
| hsa-miR-937 XM_0052547  | KIF23 | 1 |
| hsa-miR-937 XM_0052547  | KIF23 | 1 |
| hsa-miR-1244 XM_0052547 | KIF23 | 1 |
| hsa-miR-125c XM_0052547 | KIF23 | 1 |
| hsa-miR-1251 XM_0052547 | KIF23 | 1 |
| hsa-miR-1266 XM_0052547 | KIF23 | 1 |
| hsa-miR-127c XM_0052547 | KIF23 | 1 |
| hsa-miR-1288 XM_0052547 | KIF23 | 1 |
| hsa-miR-1972 XM_0052547 | KIF23 | 1 |
| hsa-miR-711 XM_0052547  | KIF23 | 1 |
| hsa-miR-3126 XM_0052547 | KIF23 | 1 |
| hsa-miR-314c XM_0052547 | KIF23 | 1 |
| hsa-miR-3169 XM_0052547 | KIF23 | 1 |
| hsa-miR-3185 XM_0052547 | KIF23 | 1 |
| hsa-miR-4298 XM_0052547 | KIF23 | 1 |
| hsa-miR-433c XM_0052547 | KIF23 | 1 |
| hsa-miR-3661 XM_0052547 | KIF23 | 1 |
| hsa-miR-3688 XM_0052547 | KIF23 | 1 |
| hsa-miR-3945 XM_0052547 | KIF23 | 1 |
| hsa-miR-4432 XM_0052547 | KIF23 | 1 |
| hsa-miR-4446 XM_0052547 | KIF23 | 1 |
| hsa-miR-3135 XM_0052547 | KIF23 | 1 |
| hsa-miR-4463 XM_0052547 | KIF23 | 1 |
| hsa-miR-4465 XM_0052547 | KIF23 | 1 |
| hsa-miR-4513 XM_0052547 | KIF23 | 1 |
| hsa-miR-4514 XM_0052547 | KIF23 | 1 |
| hsa-miR-4529 XM_0052547 | KIF23 | 1 |
| hsa-miR-4651 XM_0052547 | KIF23 | 1 |
| hsa-miR-4675 XM_0052547 | KIF23 | 1 |
| hsa-miR-4725 XM_0052547 | KIF23 | 1 |
| hsa-miR-4747 XM_0052547 | KIF23 | 1 |
| hsa-miR-4786 XM_0052547 | KIF23 | 1 |
| hsa-miR-5694 XM_0052547 | KIF23 | 1 |
| hsa-miR-5703 XM_0052547 | KIF23 | 1 |
| hsa-miR-6085 XM_0052547 | KIF23 | 1 |
| hsa-miR-378j XM_0052547 | KIF23 | 1 |
| hsa-miR-6132 XM_0052547 | KIF23 | 1 |
| hsa-miR-6501 XM_0052547 | KIF23 | 1 |
| hsa-miR-6510 XM_0052547 | KIF23 | 1 |
| hsa-miR-6511 XM_0052547 | KIF23 | 1 |
| hsa-miR-673c XM_0052547 | KIF23 | 1 |
| hsa-miR-6749 XM_0052547 | KIF23 | 1 |
| hsa-miR-6757 XM_0052547 | KIF23 | 1 |
| hsa-miR-6758 XM_0052547 | KIF23 | 1 |
| hsa-miR-6763 XM_0052547 | KIF23 | 1 |
| hsa-miR-6764 XM_0052547 | KIF23 | 1 |
| hsa-miR-6769 XM_0052547 | KIF23 | 1 |
| hsa-miR-6784 XM_0052547 | KIF23 | 1 |

|                         |       |   |
|-------------------------|-------|---|
| hsa-miR-6784 XM_0052547 | KIF23 | 1 |
| hsa-miR-6795 XM_0052547 | KIF23 | 1 |
| hsa-miR-6796 XM_0052547 | KIF23 | 1 |
| hsa-miR-6807 XM_0052547 | KIF23 | 1 |
| hsa-miR-6815 XM_0052547 | KIF23 | 1 |
| hsa-miR-682C XM_0052547 | KIF23 | 1 |
| hsa-miR-682C XM_0052547 | KIF23 | 1 |
| hsa-miR-6823 XM_0052547 | KIF23 | 1 |
| hsa-miR-6825 XM_0052547 | KIF23 | 1 |
| hsa-miR-6846 XM_0052547 | KIF23 | 1 |
| hsa-miR-6852 XM_0052547 | KIF23 | 1 |
| hsa-miR-6765 XM_0052547 | KIF23 | 1 |
| hsa-miR-6883 XM_0052547 | KIF23 | 1 |
| hsa-miR-711C XM_0052547 | KIF23 | 1 |
| hsa-miR-716C XM_0052547 | KIF23 | 1 |
| hsa-miR-1135 XM_0052547 | KIF23 | 1 |
| hsa-miR-1135 XM_0052547 | KIF23 | 1 |
| hsa-miR-6525 XM_0052547 | KIF23 | 1 |
| hsa-miR-1211 XM_0052547 | KIF23 | 1 |
| hsa-miR-1212 XM_0052547 | KIF23 | 1 |
| hsa-miR-1212 XM_0052547 | KIF23 | 1 |
| hsa-miR-208a NM_004856  | KIF23 | 1 |
| hsa-miR-147a NM_004856  | KIF23 | 1 |
| hsa-miR-182-1 NM_004856 | KIF23 | 1 |
| hsa-miR-132-1 NM_004856 | KIF23 | 1 |
| hsa-miR-150-1 NM_004856 | KIF23 | 1 |
| hsa-miR-34c-1 NM_004856 | KIF23 | 1 |
| hsa-miR-362-1 NM_004856 | KIF23 | 1 |
| hsa-miR-370-1 NM_004856 | KIF23 | 1 |
| hsa-miR-449a NM_004856  | KIF23 | 1 |
| hsa-miR-490-1 NM_004856 | KIF23 | 1 |
| hsa-miR-181d NM_004856  | KIF23 | 1 |
| hsa-miR-519d NM_004856  | KIF23 | 1 |
| hsa-miR-591 NM_004856   | KIF23 | 1 |
| hsa-miR-604 NM_004856   | KIF23 | 1 |
| hsa-miR-619-1 NM_004856 | KIF23 | 1 |
| hsa-miR-642a NM_004856  | KIF23 | 1 |
| hsa-miR-644a NM_004856  | KIF23 | 1 |
| hsa-miR-449b NM_004856  | KIF23 | 1 |
| hsa-miR-542-1 NM_004856 | KIF23 | 1 |
| hsa-miR-675-1 NM_004856 | KIF23 | 1 |
| hsa-miR-760 NM_004856   | KIF23 | 1 |
| hsa-miR-937-1 NM_004856 | KIF23 | 1 |
| hsa-miR-937-1 NM_004856 | KIF23 | 1 |
| hsa-miR-1244 NM_004856  | KIF23 | 1 |
| hsa-miR-125C NM_004856  | KIF23 | 1 |
| hsa-miR-1251 NM_004856  | KIF23 | 1 |
| hsa-miR-1266 NM_004856  | KIF23 | 1 |
| hsa-miR-1288 NM_004856  | KIF23 | 1 |
| hsa-miR-1972 NM_004856  | KIF23 | 1 |
| hsa-miR-711 NM_004856   | KIF23 | 1 |
| hsa-miR-3126 NM_004856  | KIF23 | 1 |
| hsa-miR-314C NM_004856  | KIF23 | 1 |
| hsa-miR-3157 NM_004856  | KIF23 | 1 |
| hsa-miR-3165 NM_004856  | KIF23 | 1 |
| hsa-miR-3175 NM_004856  | KIF23 | 1 |
| hsa-miR-3185 NM_004856  | KIF23 | 1 |
| hsa-miR-3202 NM_004856  | KIF23 | 1 |
| hsa-miR-4298 NM_004856  | KIF23 | 1 |
| hsa-miR-3661 NM_004856  | KIF23 | 1 |
| hsa-miR-3688 NM_004856  | KIF23 | 1 |
| hsa-miR-3685 NM_004856  | KIF23 | 1 |
| hsa-miR-3945 NM_004856  | KIF23 | 1 |
| hsa-miR-4432 NM_004856  | KIF23 | 1 |
| hsa-miR-4446 NM_004856  | KIF23 | 1 |
| hsa-miR-3135 NM_004856  | KIF23 | 1 |
| hsa-miR-4463 NM_004856  | KIF23 | 1 |
| hsa-miR-4465 NM_004856  | KIF23 | 1 |
| hsa-miR-3685 NM_004856  | KIF23 | 1 |
| hsa-miR-4494 NM_004856  | KIF23 | 1 |
| hsa-miR-4513 NM_004856  | KIF23 | 1 |
| hsa-miR-4525 NM_004856  | KIF23 | 1 |
| hsa-miR-4657 NM_004856  | KIF23 | 1 |
| hsa-miR-4665 NM_004856  | KIF23 | 1 |
| hsa-miR-4675 NM_004856  | KIF23 | 1 |
| hsa-miR-4725 NM_004856  | KIF23 | 1 |
| hsa-miR-4747 NM_004856  | KIF23 | 1 |
| hsa-miR-4754 NM_004856  | KIF23 | 1 |
| hsa-miR-4764 NM_004856  | KIF23 | 1 |
| hsa-miR-4436 NM_004856  | KIF23 | 1 |
| hsa-miR-4786 NM_004856  | KIF23 | 1 |
| hsa-miR-4524 NM_004856  | KIF23 | 1 |
| hsa-miR-5694 NM_004856  | KIF23 | 1 |
| hsa-miR-5703 NM_004856  | KIF23 | 1 |
| hsa-miR-6085 NM_004856  | KIF23 | 1 |
| hsa-miR-378j NM_004856  | KIF23 | 1 |
| hsa-miR-6495 NM_004856  | KIF23 | 1 |
| hsa-miR-6501 NM_004856  | KIF23 | 1 |
| hsa-miR-651C NM_004856  | KIF23 | 1 |
| hsa-miR-6511 NM_004856  | KIF23 | 1 |
| hsa-miR-673C NM_004856  | KIF23 | 1 |
| hsa-miR-674C NM_004856  | KIF23 | 1 |
| hsa-miR-6746 NM_004856  | KIF23 | 1 |
| hsa-miR-6745 NM_004856  | KIF23 | 1 |

|                         |       |            |
|-------------------------|-------|------------|
| hsa-miR-6757 NM_004856  | KIF23 | 1          |
| hsa-miR-6763 NM_004856  | KIF23 | 1          |
| hsa-miR-6764 NM_004856  | KIF23 | 1          |
| hsa-miR-6767 NM_004856  | KIF23 | 1          |
| hsa-miR-6769 NM_004856  | KIF23 | 1          |
| hsa-miR-6772 NM_004856  | KIF23 | 1          |
| hsa-miR-6776 NM_004856  | KIF23 | 1          |
| hsa-miR-6780 NM_004856  | KIF23 | 1          |
| hsa-miR-6784 NM_004856  | KIF23 | 1          |
| hsa-miR-6784 NM_004856  | KIF23 | 1          |
| hsa-miR-6795 NM_004856  | KIF23 | 1          |
| hsa-miR-6796 NM_004856  | KIF23 | 1          |
| hsa-miR-6807 NM_004856  | KIF23 | 1          |
| hsa-miR-6815 NM_004856  | KIF23 | 1          |
| hsa-miR-6815 NM_004856  | KIF23 | 1          |
| hsa-miR-6820 NM_004856  | KIF23 | 1          |
| hsa-miR-6823 NM_004856  | KIF23 | 1          |
| hsa-miR-6824 NM_004856  | KIF23 | 1          |
| hsa-miR-6829 NM_004856  | KIF23 | 1          |
| hsa-miR-6846 NM_004856  | KIF23 | 1          |
| hsa-miR-6769 NM_004856  | KIF23 | 1          |
| hsa-miR-6875 NM_004856  | KIF23 | 1          |
| hsa-miR-6883 NM_004856  | KIF23 | 1          |
| hsa-miR-7160 NM_004856  | KIF23 | 1          |
| hsa-miR-1139 NM_004856  | KIF23 | 1          |
| hsa-miR-1139 NM_004856  | KIF23 | 1          |
| hsa-miR-1211 NM_004856  | KIF23 | 1          |
| hsa-miR-1212 NM_004856  | KIF23 | 1          |
| hsa-miR-1212 NM_004856  | KIF23 | 1          |
| hsa-miR-6744 NM_0012814 | DNAI1 | 0.96153846 |
| hsa-miR-4743 NM_0012814 | DNAI1 | 0.97435897 |
| hsa-miR-3940 NM_0012814 | DNAI1 | 0.98076923 |
| hsa-miR-4486 NM_0012814 | DNAI1 | 0.98076923 |
| hsa-miR-6777 NM_0012814 | DNAI1 | 0.98076923 |
| hsa-miR-211- NM_012144  | DNAI1 | 0.98076923 |
| hsa-miR-23a- NM_0012814 | DNAI1 | 1          |
| hsa-miR-125t NM_0012814 | DNAI1 | 1          |
| hsa-miR-135a NM_0012814 | DNAI1 | 1          |
| hsa-miR-125a NM_0012814 | DNAI1 | 1          |
| hsa-miR-149- NM_0012814 | DNAI1 | 1          |
| hsa-miR-150- NM_0012814 | DNAI1 | 1          |
| hsa-miR-184 NM_0012814  | DNAI1 | 1          |
| hsa-miR-365a NM_0012814 | DNAI1 | 1          |
| hsa-miR-381- NM_0012814 | DNAI1 | 1          |
| hsa-miR-423- NM_0012814 | DNAI1 | 1          |
| hsa-miR-202- NM_0012814 | DNAI1 | 1          |
| hsa-miR-516t NM_0012814 | DNAI1 | 1          |
| hsa-miR-92b- NM_0012814 | DNAI1 | 1          |
| hsa-miR-541- NM_0012814 | DNAI1 | 1          |
| hsa-miR-921 NM_0012814  | DNAI1 | 1          |
| hsa-miR-1183 NM_0012814 | DNAI1 | 1          |
| hsa-miR-1250 NM_0012814 | DNAI1 | 1          |
| hsa-miR-1276 NM_0012814 | DNAI1 | 1          |
| hsa-miR-711 NM_0012814  | DNAI1 | 1          |
| hsa-miR-2861 NM_0012814 | DNAI1 | 1          |
| hsa-miR-3122 NM_0012814 | DNAI1 | 1          |
| hsa-miR-3122 NM_0012814 | DNAI1 | 1          |
| hsa-miR-3126 NM_0012814 | DNAI1 | 1          |
| hsa-miR-3131 NM_0012814 | DNAI1 | 1          |
| hsa-miR-3132 NM_0012814 | DNAI1 | 1          |
| hsa-miR-3151 NM_0012814 | DNAI1 | 1          |
| hsa-miR-3153 NM_0012814 | DNAI1 | 1          |
| hsa-miR-3154 NM_0012814 | DNAI1 | 1          |
| hsa-miR-3162 NM_0012814 | DNAI1 | 1          |
| hsa-miR-3176 NM_0012814 | DNAI1 | 1          |
| hsa-miR-3180 NM_0012814 | DNAI1 | 1          |
| hsa-miR-3191 NM_0012814 | DNAI1 | 1          |
| hsa-miR-378c NM_0012814 | DNAI1 | 1          |
| hsa-miR-4298 NM_0012814 | DNAI1 | 1          |
| hsa-miR-4314 NM_0012814 | DNAI1 | 1          |
| hsa-miR-4322 NM_0012814 | DNAI1 | 1          |
| hsa-miR-3649 NM_0012814 | DNAI1 | 1          |
| hsa-miR-3692 NM_0012814 | DNAI1 | 1          |
| hsa-miR-3934 NM_0012814 | DNAI1 | 1          |
| hsa-miR-3936 NM_0012814 | DNAI1 | 1          |
| hsa-miR-378e NM_0012814 | DNAI1 | 1          |
| hsa-miR-378g NM_0012814 | DNAI1 | 1          |
| hsa-miR-4425 NM_0012814 | DNAI1 | 1          |
| hsa-miR-4433 NM_0012814 | DNAI1 | 1          |
| hsa-miR-4437 NM_0012814 | DNAI1 | 1          |
| hsa-miR-3135 NM_0012814 | DNAI1 | 1          |
| hsa-miR-4463 NM_0012814 | DNAI1 | 1          |
| hsa-miR-4481 NM_0012814 | DNAI1 | 1          |
| hsa-miR-4489 NM_0012814 | DNAI1 | 1          |
| hsa-miR-4498 NM_0012814 | DNAI1 | 1          |
| hsa-miR-4513 NM_0012814 | DNAI1 | 1          |
| hsa-miR-4538 NM_0012814 | DNAI1 | 1          |
| hsa-miR-4667 NM_0012814 | DNAI1 | 1          |
| hsa-miR-4754 NM_0012814 | DNAI1 | 1          |
| hsa-miR-4769 NM_0012814 | DNAI1 | 1          |
| hsa-miR-4784 NM_0012814 | DNAI1 | 1          |
| hsa-miR-4786 NM_0012814 | DNAI1 | 1          |
| hsa-miR-5187 NM_0012814 | DNAI1 | 1          |
| hsa-miR-5194 NM_0012814 | DNAI1 | 1          |

|                               |   |
|-------------------------------|---|
| hsa-miR-5196 NM_0012814 DNAI1 | 1 |
| hsa-miR-6076 NM_0012814 DNAI1 | 1 |
| hsa-miR-6132 NM_0012814 DNAI1 | 1 |
| hsa-miR-6501 NM_0012814 DNAI1 | 1 |
| hsa-miR-6507 NM_0012814 DNAI1 | 1 |
| hsa-miR-6727 NM_0012814 DNAI1 | 1 |
| hsa-miR-6734 NM_0012814 DNAI1 | 1 |
| hsa-miR-6737 NM_0012814 DNAI1 | 1 |
| hsa-miR-6741 NM_0012814 DNAI1 | 1 |
| hsa-miR-6743 NM_0012814 DNAI1 | 1 |
| hsa-miR-6758 NM_0012814 DNAI1 | 1 |
| hsa-miR-6773 NM_0012814 DNAI1 | 1 |
| hsa-miR-6780 NM_0012814 DNAI1 | 1 |
| hsa-miR-6782 NM_0012814 DNAI1 | 1 |
| hsa-miR-6791 NM_0012814 DNAI1 | 1 |
| hsa-miR-6793 NM_0012814 DNAI1 | 1 |
| hsa-miR-6795 NM_0012814 DNAI1 | 1 |
| hsa-miR-6800 NM_0012814 DNAI1 | 1 |
| hsa-miR-6803 NM_0012814 DNAI1 | 1 |
| hsa-miR-6808 NM_0012814 DNAI1 | 1 |
| hsa-miR-6816 NM_0012814 DNAI1 | 1 |
| hsa-miR-6819 NM_0012814 DNAI1 | 1 |
| hsa-miR-6834 NM_0012814 DNAI1 | 1 |
| hsa-miR-6834 NM_0012814 DNAI1 | 1 |
| hsa-miR-6835 NM_0012814 DNAI1 | 1 |
| hsa-miR-6852 NM_0012814 DNAI1 | 1 |
| hsa-miR-6855 NM_0012814 DNAI1 | 1 |
| hsa-miR-6860 NM_0012814 DNAI1 | 1 |
| hsa-miR-6862 NM_0012814 DNAI1 | 1 |
| hsa-miR-6865 NM_0012814 DNAI1 | 1 |
| hsa-miR-6870 NM_0012814 DNAI1 | 1 |
| hsa-miR-6870 NM_0012814 DNAI1 | 1 |
| hsa-miR-6870 NM_0012814 DNAI1 | 1 |
| hsa-miR-6875 NM_0012814 DNAI1 | 1 |
| hsa-miR-6876 NM_0012814 DNAI1 | 1 |
| hsa-miR-6881 NM_0012814 DNAI1 | 1 |
| hsa-miR-6887 NM_0012814 DNAI1 | 1 |
| hsa-miR-7160 NM_0012814 DNAI1 | 1 |
| hsa-miR-8078 NM_0012814 DNAI1 | 1 |
| hsa-miR-1039 NM_0012814 DNAI1 | 1 |
| hsa-miR-1040 NM_0012814 DNAI1 | 1 |
| hsa-miR-1052 NM_0012814 DNAI1 | 1 |
| hsa-miR-6529 NM_0012814 DNAI1 | 1 |
| hsa-miR-1211 NM_0012814 DNAI1 | 1 |
| hsa-miR-1211 NM_0012814 DNAI1 | 1 |
| hsa-miR-1212 NM_0012814 DNAI1 | 1 |
| hsa-miR-135a NM_012144 DNAI1  | 1 |
| hsa-miR-138-1 NM_012144 DNAI1 | 1 |
| hsa-miR-125a NM_012144 DNAI1  | 1 |
| hsa-miR-149-1 NM_012144 DNAI1 | 1 |
| hsa-miR-150-1 NM_012144 DNAI1 | 1 |
| hsa-miR-184 NM_012144 DNAI1   | 1 |
| hsa-miR-365a NM_012144 DNAI1  | 1 |
| hsa-miR-381-1 NM_012144 DNAI1 | 1 |
| hsa-miR-423-1 NM_012144 DNAI1 | 1 |
| hsa-miR-516b NM_012144 DNAI1  | 1 |
| hsa-miR-608 NM_012144 DNAI1   | 1 |
| hsa-miR-541-1 NM_012144 DNAI1 | 1 |
| hsa-miR-744-1 NM_012144 DNAI1 | 1 |
| hsa-miR-921 NM_012144 DNAI1   | 1 |
| hsa-miR-1237 NM_012144 DNAI1  | 1 |
| hsa-miR-1268 NM_012144 DNAI1  | 1 |
| hsa-miR-1275 NM_012144 DNAI1  | 1 |
| hsa-miR-711 NM_012144 DNAI1   | 1 |
| hsa-miR-2861 NM_012144 DNAI1  | 1 |
| hsa-miR-3122 NM_012144 DNAI1  | 1 |
| hsa-miR-3122 NM_012144 DNAI1  | 1 |
| hsa-miR-3126 NM_012144 DNAI1  | 1 |
| hsa-miR-3131 NM_012144 DNAI1  | 1 |
| hsa-miR-3151 NM_012144 DNAI1  | 1 |
| hsa-miR-3153 NM_012144 DNAI1  | 1 |
| hsa-miR-3154 NM_012144 DNAI1  | 1 |
| hsa-miR-3180 NM_012144 DNAI1  | 1 |
| hsa-miR-3191 NM_012144 DNAI1  | 1 |
| hsa-miR-378c NM_012144 DNAI1  | 1 |
| hsa-miR-4298 NM_012144 DNAI1  | 1 |
| hsa-miR-4298 NM_012144 DNAI1  | 1 |
| hsa-miR-4322 NM_012144 DNAI1  | 1 |
| hsa-miR-4259 NM_012144 DNAI1  | 1 |
| hsa-miR-4283 NM_012144 DNAI1  | 1 |
| hsa-miR-3646 NM_012144 DNAI1  | 1 |
| hsa-miR-3649 NM_012144 DNAI1  | 1 |
| hsa-miR-3679 NM_012144 DNAI1  | 1 |
| hsa-miR-3680 NM_012144 DNAI1  | 1 |
| hsa-miR-3691 NM_012144 DNAI1  | 1 |
| hsa-miR-3692 NM_012144 DNAI1  | 1 |
| hsa-miR-378e NM_012144 DNAI1  | 1 |
| hsa-miR-4425 NM_012144 DNAI1  | 1 |
| hsa-miR-4437 NM_012144 DNAI1  | 1 |
| hsa-miR-3135 NM_012144 DNAI1  | 1 |
| hsa-miR-4462 NM_012144 DNAI1  | 1 |
| hsa-miR-4463 NM_012144 DNAI1  | 1 |
| hsa-miR-4489 NM_012144 DNAI1  | 1 |
| hsa-miR-4492 NM_012144 DNAI1  | 1 |
| hsa-miR-4505 NM_012144 DNAI1  | 1 |

|                         |       |            |
|-------------------------|-------|------------|
| hsa-miR-4508 NM_012144  | DNAI1 | 1          |
| hsa-miR-4513 NM_012144  | DNAI1 | 1          |
| hsa-miR-378i NM_012144  | DNAI1 | 1          |
| hsa-miR-1587 NM_012144  | DNAI1 | 1          |
| hsa-miR-4538 NM_012144  | DNAI1 | 1          |
| hsa-miR-4667 NM_012144  | DNAI1 | 1          |
| hsa-miR-3525 NM_012144  | DNAI1 | 1          |
| hsa-miR-4742 NM_012144  | DNAI1 | 1          |
| hsa-miR-4754 NM_012144  | DNAI1 | 1          |
| hsa-miR-4765 NM_012144  | DNAI1 | 1          |
| hsa-miR-4784 NM_012144  | DNAI1 | 1          |
| hsa-miR-4786 NM_012144  | DNAI1 | 1          |
| hsa-miR-5006 NM_012144  | DNAI1 | 1          |
| hsa-miR-5187 NM_012144  | DNAI1 | 1          |
| hsa-miR-5196 NM_012144  | DNAI1 | 1          |
| hsa-miR-5787 NM_012144  | DNAI1 | 1          |
| hsa-miR-6132 NM_012144  | DNAI1 | 1          |
| hsa-miR-6501 NM_012144  | DNAI1 | 1          |
| hsa-miR-6507 NM_012144  | DNAI1 | 1          |
| hsa-miR-6727 NM_012144  | DNAI1 | 1          |
| hsa-miR-6743 NM_012144  | DNAI1 | 1          |
| hsa-miR-6751 NM_012144  | DNAI1 | 1          |
| hsa-miR-6757 NM_012144  | DNAI1 | 1          |
| hsa-miR-6758 NM_012144  | DNAI1 | 1          |
| hsa-miR-6782 NM_012144  | DNAI1 | 1          |
| hsa-miR-6786 NM_012144  | DNAI1 | 1          |
| hsa-miR-6791 NM_012144  | DNAI1 | 1          |
| hsa-miR-6793 NM_012144  | DNAI1 | 1          |
| hsa-miR-6795 NM_012144  | DNAI1 | 1          |
| hsa-miR-6803 NM_012144  | DNAI1 | 1          |
| hsa-miR-6803 NM_012144  | DNAI1 | 1          |
| hsa-miR-6808 NM_012144  | DNAI1 | 1          |
| hsa-miR-6819 NM_012144  | DNAI1 | 1          |
| hsa-miR-6826 NM_012144  | DNAI1 | 1          |
| hsa-miR-6825 NM_012144  | DNAI1 | 1          |
| hsa-miR-6834 NM_012144  | DNAI1 | 1          |
| hsa-miR-6851 NM_012144  | DNAI1 | 1          |
| hsa-miR-6852 NM_012144  | DNAI1 | 1          |
| hsa-miR-686C NM_012144  | DNAI1 | 1          |
| hsa-miR-6862 NM_012144  | DNAI1 | 1          |
| hsa-miR-6867 NM_012144  | DNAI1 | 1          |
| hsa-miR-687C NM_012144  | DNAI1 | 1          |
| hsa-miR-6874 NM_012144  | DNAI1 | 1          |
| hsa-miR-6876 NM_012144  | DNAI1 | 1          |
| hsa-miR-6881 NM_012144  | DNAI1 | 1          |
| hsa-miR-6887 NM_012144  | DNAI1 | 1          |
| hsa-miR-6894 NM_012144  | DNAI1 | 1          |
| hsa-miR-7155 NM_012144  | DNAI1 | 1          |
| hsa-miR-716C NM_012144  | DNAI1 | 1          |
| hsa-miR-8085 NM_012144  | DNAI1 | 1          |
| hsa-miR-950C NM_012144  | DNAI1 | 1          |
| hsa-miR-1052 NM_012144  | DNAI1 | 1          |
| hsa-miR-6525 NM_012144  | DNAI1 | 1          |
| hsa-miR-1211 NM_012144  | DNAI1 | 1          |
| hsa-miR-1211 NM_012144  | DNAI1 | 1          |
| hsa-miR-1212 NM_012144  | DNAI1 | 1          |
| hsa-miR-1972 NM_0012823 | IDH1  | 0.95384615 |
| hsa-miR-3195 NM_0012823 | IDH1  | 0.95384615 |
| hsa-miR-6881 NM_0012823 | IDH1  | 0.95384615 |
| hsa-miR-3154 NM_0012823 | IDH1  | 0.95384615 |
| hsa-miR-3125 NM_005896  | IDH1  | 0.95384615 |
| hsa-miR-3154 NM_005896  | IDH1  | 0.95384615 |
| hsa-miR-3195 NM_005896  | IDH1  | 0.95384615 |
| hsa-miR-4667 NM_005896  | IDH1  | 0.95384615 |
| hsa-miR-6873 NM_005896  | IDH1  | 0.95384615 |
| hsa-miR-6881 NM_005896  | IDH1  | 0.95384615 |
| hsa-miR-660- NM_0012823 | IDH1  | 0.96153846 |
| hsa-miR-873- NM_0012823 | IDH1  | 0.96153846 |
| hsa-miR-3126 NM_0012823 | IDH1  | 0.96153846 |
| hsa-miR-4507 NM_0012823 | IDH1  | 0.96153846 |
| hsa-miR-5192 NM_0012823 | IDH1  | 0.96153846 |
| hsa-miR-1295 NM_0012823 | IDH1  | 0.96153846 |
| hsa-miR-651C NM_0012823 | IDH1  | 0.96153846 |
| hsa-miR-674C NM_0012823 | IDH1  | 0.96153846 |
| hsa-miR-873- NM_0012823 | IDH1  | 0.96153846 |
| hsa-miR-2392 NM_0012823 | IDH1  | 0.96153846 |
| hsa-miR-4507 NM_0012823 | IDH1  | 0.96153846 |
| hsa-miR-651C NM_0012823 | IDH1  | 0.96153846 |
| hsa-miR-6716 NM_0012823 | IDH1  | 0.96153846 |
| hsa-miR-674C NM_0012823 | IDH1  | 0.96153846 |
| hsa-miR-6837 NM_0012823 | IDH1  | 0.96153846 |
| hsa-miR-660- NM_005896  | IDH1  | 0.96153846 |
| hsa-miR-873- NM_005896  | IDH1  | 0.96153846 |
| hsa-miR-3126 NM_005896  | IDH1  | 0.96153846 |
| hsa-miR-4507 NM_005896  | IDH1  | 0.96153846 |
| hsa-miR-1295 NM_005896  | IDH1  | 0.96153846 |
| hsa-miR-651C NM_005896  | IDH1  | 0.96153846 |
| hsa-miR-674C NM_005896  | IDH1  | 0.96153846 |
| hsa-miR-6777 NM_005896  | IDH1  | 0.96153846 |
| hsa-miR-6807 NM_005896  | IDH1  | 0.96153846 |
| hsa-miR-6837 NM_005896  | IDH1  | 0.96153846 |
| hsa-miR-6824 NM_0012823 | IDH1  | 0.96923077 |
| hsa-miR-4466 NM_0012823 | IDH1  | 0.97435897 |
| hsa-miR-1228 NM_005896  | IDH1  | 0.97435897 |

|                               |            |
|-------------------------------|------------|
| hsa-miR-1207 NM_0012823 IDH1  | 0.98076923 |
| hsa-miR-5004 NM_0012823 IDH1  | 0.98076923 |
| hsa-let-7e-5p NM_0012823 IDH1 | 1          |
| hsa-miR-198 NM_0012823 IDH1   | 1          |
| hsa-miR-30c-; NM_0012823 IDH1 | 1          |
| hsa-miR-34a-; NM_0012823 IDH1 | 1          |
| hsa-miR-214-; NM_0012823 IDH1 | 1          |
| hsa-miR-214-; NM_0012823 IDH1 | 1          |
| hsa-miR-124-; NM_0012823 IDH1 | 1          |
| hsa-miR-125b; NM_0012823 IDH1 | 1          |
| hsa-miR-149-; NM_0012823 IDH1 | 1          |
| hsa-miR-320a; NM_0012823 IDH1 | 1          |
| hsa-miR-30c-; NM_0012823 IDH1 | 1          |
| hsa-miR-330-; NM_0012823 IDH1 | 1          |
| hsa-miR-422a; NM_0012823 IDH1 | 1          |
| hsa-miR-20b-; NM_0012823 IDH1 | 1          |
| hsa-miR-450a; NM_0012823 IDH1 | 1          |
| hsa-miR-483-; NM_0012823 IDH1 | 1          |
| hsa-miR-490-; NM_0012823 IDH1 | 1          |
| hsa-miR-450a; NM_0012823 IDH1 | 1          |
| hsa-miR-550a; NM_0012823 IDH1 | 1          |
| hsa-miR-320b; NM_0012823 IDH1 | 1          |
| hsa-miR-320c; NM_0012823 IDH1 | 1          |
| hsa-miR-885-; NM_0012823 IDH1 | 1          |
| hsa-miR-1227; NM_0012823 IDH1 | 1          |
| hsa-miR-1233; NM_0012823 IDH1 | 1          |
| hsa-miR-1202; NM_0012823 IDH1 | 1          |
| hsa-miR-1249; NM_0012823 IDH1 | 1          |
| hsa-miR-320d; NM_0012823 IDH1 | 1          |
| hsa-miR-2116; NM_0012823 IDH1 | 1          |
| hsa-miR-3124; NM_0012823 IDH1 | 1          |
| hsa-miR-3125; NM_0012823 IDH1 | 1          |
| hsa-miR-3135; NM_0012823 IDH1 | 1          |
| hsa-miR-3141; NM_0012823 IDH1 | 1          |
| hsa-miR-3147; NM_0012823 IDH1 | 1          |
| hsa-miR-3155; NM_0012823 IDH1 | 1          |
| hsa-miR-3157; NM_0012823 IDH1 | 1          |
| hsa-miR-3180; NM_0012823 IDH1 | 1          |
| hsa-miR-3197; NM_0012823 IDH1 | 1          |
| hsa-miR-4255; NM_0012823 IDH1 | 1          |
| hsa-miR-4253; NM_0012823 IDH1 | 1          |
| hsa-miR-4253; NM_0012823 IDH1 | 1          |
| hsa-miR-4281; NM_0012823 IDH1 | 1          |
| hsa-miR-4281; NM_0012823 IDH1 | 1          |
| hsa-miR-3666; NM_0012823 IDH1 | 1          |
| hsa-miR-3679; NM_0012823 IDH1 | 1          |
| hsa-miR-3180; NM_0012823 IDH1 | 1          |
| hsa-miR-4429; NM_0012823 IDH1 | 1          |
| hsa-miR-4430; NM_0012823 IDH1 | 1          |
| hsa-miR-4436; NM_0012823 IDH1 | 1          |
| hsa-miR-4450; NM_0012823 IDH1 | 1          |
| hsa-miR-4478; NM_0012823 IDH1 | 1          |
| hsa-miR-4486; NM_0012823 IDH1 | 1          |
| hsa-miR-4505; NM_0012823 IDH1 | 1          |
| hsa-miR-4514; NM_0012823 IDH1 | 1          |
| hsa-miR-4521; NM_0012823 IDH1 | 1          |
| hsa-miR-4522; NM_0012823 IDH1 | 1          |
| hsa-miR-1587; NM_0012823 IDH1 | 1          |
| hsa-miR-219b; NM_0012823 IDH1 | 1          |
| hsa-miR-4671; NM_0012823 IDH1 | 1          |
| hsa-miR-4711; NM_0012823 IDH1 | 1          |
| hsa-miR-4711; NM_0012823 IDH1 | 1          |
| hsa-miR-4716; NM_0012823 IDH1 | 1          |
| hsa-miR-4717; NM_0012823 IDH1 | 1          |
| hsa-miR-4728; NM_0012823 IDH1 | 1          |
| hsa-miR-4739; NM_0012823 IDH1 | 1          |
| hsa-miR-4743; NM_0012823 IDH1 | 1          |
| hsa-miR-4755; NM_0012823 IDH1 | 1          |
| hsa-miR-4773; NM_0012823 IDH1 | 1          |
| hsa-miR-4788; NM_0012823 IDH1 | 1          |
| hsa-miR-4796; NM_0012823 IDH1 | 1          |
| hsa-miR-5093; NM_0012823 IDH1 | 1          |
| hsa-miR-5093; NM_0012823 IDH1 | 1          |
| hsa-miR-5189; NM_0012823 IDH1 | 1          |
| hsa-miR-5681; NM_0012823 IDH1 | 1          |
| hsa-miR-5690; NM_0012823 IDH1 | 1          |
| hsa-miR-5787; NM_0012823 IDH1 | 1          |
| hsa-miR-6068; NM_0012823 IDH1 | 1          |
| hsa-miR-6074; NM_0012823 IDH1 | 1          |
| hsa-miR-6085; NM_0012823 IDH1 | 1          |
| hsa-miR-6507; NM_0012823 IDH1 | 1          |
| hsa-miR-6728; NM_0012823 IDH1 | 1          |
| hsa-miR-6730; NM_0012823 IDH1 | 1          |
| hsa-miR-6734; NM_0012823 IDH1 | 1          |
| hsa-miR-6736; NM_0012823 IDH1 | 1          |
| hsa-miR-6749; NM_0012823 IDH1 | 1          |
| hsa-miR-6754; NM_0012823 IDH1 | 1          |
| hsa-miR-6756; NM_0012823 IDH1 | 1          |
| hsa-miR-6769; NM_0012823 IDH1 | 1          |
| hsa-miR-6778; NM_0012823 IDH1 | 1          |
| hsa-miR-6778; NM_0012823 IDH1 | 1          |
| hsa-miR-6780; NM_0012823 IDH1 | 1          |
| hsa-miR-6800; NM_0012823 IDH1 | 1          |
| hsa-miR-6807; NM_0012823 IDH1 | 1          |

|                                |   |
|--------------------------------|---|
| hsa-miR-6812 NM_0012823 IDH1   | 1 |
| hsa-miR-6828 NM_0012823 IDH1   | 1 |
| hsa-miR-6831 NM_0012823 IDH1   | 1 |
| hsa-miR-6837 NM_0012823 IDH1   | 1 |
| hsa-miR-6837 NM_0012823 IDH1   | 1 |
| hsa-miR-6837 NM_0012823 IDH1   | 1 |
| hsa-miR-6846 NM_0012823 IDH1   | 1 |
| hsa-miR-6859 NM_0012823 IDH1   | 1 |
| hsa-miR-6865 NM_0012823 IDH1   | 1 |
| hsa-miR-6878 NM_0012823 IDH1   | 1 |
| hsa-miR-6879 NM_0012823 IDH1   | 1 |
| hsa-miR-688C NM_0012823 IDH1   | 1 |
| hsa-miR-6893 NM_0012823 IDH1   | 1 |
| hsa-miR-6895 NM_0012823 IDH1   | 1 |
| hsa-miR-7106 NM_0012823 IDH1   | 1 |
| hsa-miR-7107 NM_0012823 IDH1   | 1 |
| hsa-miR-711C NM_0012823 IDH1   | 1 |
| hsa-miR-7111 NM_0012823 IDH1   | 1 |
| hsa-miR-7846 NM_0012823 IDH1   | 1 |
| hsa-miR-7847 NM_0012823 IDH1   | 1 |
| hsa-miR-8072 NM_0012823 IDH1   | 1 |
| hsa-miR-8078 NM_0012823 IDH1   | 1 |
| hsa-miR-8085 NM_0012823 IDH1   | 1 |
| hsa-miR-1039 NM_0012823 IDH1   | 1 |
| hsa-miR-1211 NM_0012823 IDH1   | 1 |
| hsa-miR-1212 NM_0012823 IDH1   | 1 |
| hsa-let-7a-2-3 NM_0012823 IDH1 | 1 |
| hsa-miR-17-3j NM_0012823 IDH1  | 1 |
| hsa-miR-198 NM_0012823 IDH1    | 1 |
| hsa-miR-129-1 NM_0012823 IDH1  | 1 |
| hsa-miR-214-1 NM_0012823 IDH1  | 1 |
| hsa-miR-214-2 NM_0012823 IDH1  | 1 |
| hsa-let-7i-3p NM_0012823 IDH1  | 1 |
| hsa-miR-124-1 NM_0012823 IDH1  | 1 |
| hsa-miR-125b NM_0012823 IDH1   | 1 |
| hsa-miR-134-1 NM_0012823 IDH1  | 1 |
| hsa-miR-149-1 NM_0012823 IDH1  | 1 |
| hsa-miR-150-1 NM_0012823 IDH1  | 1 |
| hsa-miR-330-1 NM_0012823 IDH1  | 1 |
| hsa-miR-325 NM_0012823 IDH1    | 1 |
| hsa-miR-422a NM_0012823 IDH1   | 1 |
| hsa-miR-483-1 NM_0012823 IDH1  | 1 |
| hsa-miR-490-1 NM_0012823 IDH1  | 1 |
| hsa-miR-450a NM_0012823 IDH1   | 1 |
| hsa-miR-514a NM_0012823 IDH1   | 1 |
| hsa-miR-551b NM_0012823 IDH1   | 1 |
| hsa-miR-597-1 NM_0012823 IDH1  | 1 |
| hsa-miR-650 NM_0012823 IDH1    | 1 |
| hsa-miR-1185 NM_0012823 IDH1   | 1 |
| hsa-miR-1185 NM_0012823 IDH1   | 1 |
| hsa-miR-147b NM_0012823 IDH1   | 1 |
| hsa-miR-744-1 NM_0012823 IDH1  | 1 |
| hsa-miR-885-1 NM_0012823 IDH1  | 1 |
| hsa-miR-921 NM_0012823 IDH1    | 1 |
| hsa-miR-1229 NM_0012823 IDH1   | 1 |
| hsa-miR-1236 NM_0012823 IDH1   | 1 |
| hsa-miR-1249 NM_0012823 IDH1   | 1 |
| hsa-miR-548g NM_0012823 IDH1   | 1 |
| hsa-miR-548p NM_0012823 IDH1   | 1 |
| hsa-miR-1972 NM_0012823 IDH1   | 1 |
| hsa-miR-3126 NM_0012823 IDH1   | 1 |
| hsa-miR-3135 NM_0012823 IDH1   | 1 |
| hsa-miR-3141 NM_0012823 IDH1   | 1 |
| hsa-miR-3147 NM_0012823 IDH1   | 1 |
| hsa-miR-3147 NM_0012823 IDH1   | 1 |
| hsa-miR-3157 NM_0012823 IDH1   | 1 |
| hsa-miR-3162 NM_0012823 IDH1   | 1 |
| hsa-miR-319C NM_0012823 IDH1   | 1 |
| hsa-miR-3194 NM_0012823 IDH1   | 1 |
| hsa-miR-3195 NM_0012823 IDH1   | 1 |
| hsa-miR-548x NM_0012823 IDH1   | 1 |
| hsa-miR-3197 NM_0012823 IDH1   | 1 |
| hsa-miR-4253 NM_0012823 IDH1   | 1 |
| hsa-miR-4253 NM_0012823 IDH1   | 1 |
| hsa-miR-4327 NM_0012823 IDH1   | 1 |
| hsa-miR-4281 NM_0012823 IDH1   | 1 |
| hsa-miR-3666 NM_0012823 IDH1   | 1 |
| hsa-miR-3678 NM_0012823 IDH1   | 1 |
| hsa-miR-3679 NM_0012823 IDH1   | 1 |
| hsa-miR-318C NM_0012823 IDH1   | 1 |
| hsa-miR-642b NM_0012823 IDH1   | 1 |
| hsa-miR-443C NM_0012823 IDH1   | 1 |
| hsa-miR-4436 NM_0012823 IDH1   | 1 |
| hsa-miR-548a NM_0012823 IDH1   | 1 |
| hsa-miR-548a NM_0012823 IDH1   | 1 |
| hsa-miR-4471 NM_0012823 IDH1   | 1 |
| hsa-miR-3155 NM_0012823 IDH1   | 1 |
| hsa-miR-4505 NM_0012823 IDH1   | 1 |
| hsa-miR-4522 NM_0012823 IDH1   | 1 |
| hsa-miR-4527 NM_0012823 IDH1   | 1 |
| hsa-miR-4651 NM_0012823 IDH1   | 1 |
| hsa-miR-4671 NM_0012823 IDH1   | 1 |
| hsa-miR-1343 NM_0012823 IDH1   | 1 |
| hsa-miR-469C NM_0012823 IDH1   | 1 |



|                              |   |
|------------------------------|---|
| hsa-miR-4694 NM_0012823 IDH1 | 1 |
| hsa-miR-4698 NM_0012823 IDH1 | 1 |
| hsa-miR-4711 NM_0012823 IDH1 | 1 |
| hsa-miR-4713 NM_0012823 IDH1 | 1 |
| hsa-miR-4716 NM_0012823 IDH1 | 1 |
| hsa-miR-4728 NM_0012823 IDH1 | 1 |
| hsa-miR-4436 NM_0012823 IDH1 | 1 |
| hsa-miR-5093 NM_0012823 IDH1 | 1 |
| hsa-miR-5185 NM_0012823 IDH1 | 1 |
| hsa-miR-1295 NM_0012823 IDH1 | 1 |
| hsa-miR-5690 NM_0012823 IDH1 | 1 |
| hsa-miR-5787 NM_0012823 IDH1 | 1 |
| hsa-miR-6068 NM_0012823 IDH1 | 1 |
| hsa-miR-6085 NM_0012823 IDH1 | 1 |
| hsa-miR-6124 NM_0012823 IDH1 | 1 |
| hsa-miR-6507 NM_0012823 IDH1 | 1 |
| hsa-miR-6511 NM_0012823 IDH1 | 1 |
| hsa-miR-6746 NM_0012823 IDH1 | 1 |
| hsa-miR-6749 NM_0012823 IDH1 | 1 |
| hsa-miR-6756 NM_0012823 IDH1 | 1 |
| hsa-miR-6768 NM_0012823 IDH1 | 1 |
| hsa-miR-6769 NM_0012823 IDH1 | 1 |
| hsa-miR-6777 NM_0012823 IDH1 | 1 |
| hsa-miR-6778 NM_0012823 IDH1 | 1 |
| hsa-miR-6779 NM_0012823 IDH1 | 1 |
| hsa-miR-6780 NM_0012823 IDH1 | 1 |
| hsa-miR-6781 NM_0012823 IDH1 | 1 |
| hsa-miR-6801 NM_0012823 IDH1 | 1 |
| hsa-miR-6807 NM_0012823 IDH1 | 1 |
| hsa-miR-6809 NM_0012823 IDH1 | 1 |
| hsa-miR-6812 NM_0012823 IDH1 | 1 |
| hsa-miR-6815 NM_0012823 IDH1 | 1 |
| hsa-miR-6827 NM_0012823 IDH1 | 1 |
| hsa-miR-6828 NM_0012823 IDH1 | 1 |
| hsa-miR-6831 NM_0012823 IDH1 | 1 |
| hsa-miR-6837 NM_0012823 IDH1 | 1 |
| hsa-miR-6846 NM_0012823 IDH1 | 1 |
| hsa-miR-6859 NM_0012823 IDH1 | 1 |
| hsa-miR-6765 NM_0012823 IDH1 | 1 |
| hsa-miR-6862 NM_0012823 IDH1 | 1 |
| hsa-miR-6865 NM_0012823 IDH1 | 1 |
| hsa-miR-6868 NM_0012823 IDH1 | 1 |
| hsa-miR-6878 NM_0012823 IDH1 | 1 |
| hsa-miR-6881 NM_0012823 IDH1 | 1 |
| hsa-miR-6883 NM_0012823 IDH1 | 1 |
| hsa-miR-6891 NM_0012823 IDH1 | 1 |
| hsa-miR-6893 NM_0012823 IDH1 | 1 |
| hsa-miR-6895 NM_0012823 IDH1 | 1 |
| hsa-miR-7107 NM_0012823 IDH1 | 1 |
| hsa-miR-7109 NM_0012823 IDH1 | 1 |
| hsa-miR-7111 NM_0012823 IDH1 | 1 |
| hsa-miR-7150 NM_0012823 IDH1 | 1 |
| hsa-miR-7515 NM_0012823 IDH1 | 1 |
| hsa-miR-7847 NM_0012823 IDH1 | 1 |
| hsa-miR-7974 NM_0012823 IDH1 | 1 |
| hsa-miR-8072 NM_0012823 IDH1 | 1 |
| hsa-miR-8072 NM_0012823 IDH1 | 1 |
| hsa-miR-8078 NM_0012823 IDH1 | 1 |
| hsa-miR-1035 NM_0012823 IDH1 | 1 |
| hsa-miR-1039 NM_0012823 IDH1 | 1 |
| hsa-miR-9851 NM_0012823 IDH1 | 1 |
| hsa-miR-1212 NM_0012823 IDH1 | 1 |
| hsa-miR-1213 NM_0012823 IDH1 | 1 |
| hsa-let-7e-5p NM_005896 IDH1 | 1 |
| hsa-miR-198 NM_005896 IDH1   | 1 |
| hsa-miR-30c-1 NM_005896 IDH1 | 1 |
| hsa-miR-34a-1 NM_005896 IDH1 | 1 |
| hsa-let-7i-3p NM_005896 IDH1 | 1 |
| hsa-miR-124-1 NM_005896 IDH1 | 1 |
| hsa-miR-125b NM_005896 IDH1  | 1 |
| hsa-miR-149-1 NM_005896 IDH1 | 1 |
| hsa-miR-30c-1 NM_005896 IDH1 | 1 |
| hsa-miR-30c-1 NM_005896 IDH1 | 1 |
| hsa-miR-325 NM_005896 IDH1   | 1 |
| hsa-miR-422a NM_005896 IDH1  | 1 |
| hsa-miR-423-1 NM_005896 IDH1 | 1 |
| hsa-miR-450a NM_005896 IDH1  | 1 |
| hsa-miR-483-1 NM_005896 IDH1 | 1 |
| hsa-miR-485-1 NM_005896 IDH1 | 1 |
| hsa-miR-490-1 NM_005896 IDH1 | 1 |
| hsa-miR-498-1 NM_005896 IDH1 | 1 |
| hsa-miR-450a NM_005896 IDH1  | 1 |
| hsa-miR-514a NM_005896 IDH1  | 1 |
| hsa-miR-638 NM_005896 IDH1   | 1 |
| hsa-miR-769-1 NM_005896 IDH1 | 1 |
| hsa-miR-885-1 NM_005896 IDH1 | 1 |
| hsa-miR-921 NM_005896 IDH1   | 1 |
| hsa-miR-1207 NM_005896 IDH1  | 1 |
| hsa-miR-1245 NM_005896 IDH1  | 1 |
| hsa-miR-1972 NM_005896 IDH1  | 1 |
| hsa-miR-2116 NM_005896 IDH1  | 1 |
| hsa-miR-2682 NM_005896 IDH1  | 1 |
| hsa-miR-3135 NM_005896 IDH1  | 1 |
| hsa-miR-3141 NM_005896 IDH1  | 1 |

|                          |       |            |
|--------------------------|-------|------------|
| hsa-miR-3147 NM_005896   | IDH1  | 1          |
| hsa-miR-3153 NM_005896   | IDH1  | 1          |
| hsa-miR-3155 NM_005896   | IDH1  | 1          |
| hsa-miR-3157 NM_005896   | IDH1  | 1          |
| hsa-miR-3162 NM_005896   | IDH1  | 1          |
| hsa-miR-3190 NM_005896   | IDH1  | 1          |
| hsa-miR-3190 NM_005896   | IDH1  | 1          |
| hsa-miR-3197 NM_005896   | IDH1  | 1          |
| hsa-miR-4253 NM_005896   | IDH1  | 1          |
| hsa-miR-4253 NM_005896   | IDH1  | 1          |
| hsa-miR-4327 NM_005896   | IDH1  | 1          |
| hsa-miR-3613 NM_005896   | IDH1  | 1          |
| hsa-miR-3620 NM_005896   | IDH1  | 1          |
| hsa-miR-3622 NM_005896   | IDH1  | 1          |
| hsa-miR-3180 NM_005896   | IDH1  | 1          |
| hsa-miR-3945 NM_005896   | IDH1  | 1          |
| hsa-miR-642b NM_005896   | IDH1  | 1          |
| hsa-miR-4418 NM_005896   | IDH1  | 1          |
| hsa-miR-4429 NM_005896   | IDH1  | 1          |
| hsa-miR-4430 NM_005896   | IDH1  | 1          |
| hsa-miR-4436 NM_005896   | IDH1  | 1          |
| hsa-miR-4436 NM_005896   | IDH1  | 1          |
| hsa-miR-4486 NM_005896   | IDH1  | 1          |
| hsa-miR-4505 NM_005896   | IDH1  | 1          |
| hsa-miR-4521 NM_005896   | IDH1  | 1          |
| hsa-miR-4522 NM_005896   | IDH1  | 1          |
| hsa-miR-1587 NM_005896   | IDH1  | 1          |
| hsa-miR-4651 NM_005896   | IDH1  | 1          |
| hsa-miR-4671 NM_005896   | IDH1  | 1          |
| hsa-miR-4690 NM_005896   | IDH1  | 1          |
| hsa-miR-4711 NM_005896   | IDH1  | 1          |
| hsa-miR-4713 NM_005896   | IDH1  | 1          |
| hsa-miR-4717 NM_005896   | IDH1  | 1          |
| hsa-miR-4732 NM_005896   | IDH1  | 1          |
| hsa-miR-4735 NM_005896   | IDH1  | 1          |
| hsa-miR-4773 NM_005896   | IDH1  | 1          |
| hsa-miR-4773 NM_005896   | IDH1  | 1          |
| hsa-miR-5088 NM_005896   | IDH1  | 1          |
| hsa-miR-5093 NM_005896   | IDH1  | 1          |
| hsa-miR-5093 NM_005896   | IDH1  | 1          |
| hsa-miR-5185 NM_005896   | IDH1  | 1          |
| hsa-miR-5681 NM_005896   | IDH1  | 1          |
| hsa-miR-5690 NM_005896   | IDH1  | 1          |
| hsa-miR-5690 NM_005896   | IDH1  | 1          |
| hsa-miR-5787 NM_005896   | IDH1  | 1          |
| hsa-miR-6068 NM_005896   | IDH1  | 1          |
| hsa-miR-6074 NM_005896   | IDH1  | 1          |
| hsa-miR-6085 NM_005896   | IDH1  | 1          |
| hsa-miR-6124 NM_005896   | IDH1  | 1          |
| hsa-miR-6507 NM_005896   | IDH1  | 1          |
| hsa-miR-6730 NM_005896   | IDH1  | 1          |
| hsa-miR-6734 NM_005896   | IDH1  | 1          |
| hsa-miR-6736 NM_005896   | IDH1  | 1          |
| hsa-miR-6746 NM_005896   | IDH1  | 1          |
| hsa-miR-6745 NM_005896   | IDH1  | 1          |
| hsa-miR-6756 NM_005896   | IDH1  | 1          |
| hsa-miR-6778 NM_005896   | IDH1  | 1          |
| hsa-miR-6778 NM_005896   | IDH1  | 1          |
| hsa-miR-6779 NM_005896   | IDH1  | 1          |
| hsa-miR-6780 NM_005896   | IDH1  | 1          |
| hsa-miR-6794 NM_005896   | IDH1  | 1          |
| hsa-miR-6801 NM_005896   | IDH1  | 1          |
| hsa-miR-6807 NM_005896   | IDH1  | 1          |
| hsa-miR-6815 NM_005896   | IDH1  | 1          |
| hsa-miR-6831 NM_005896   | IDH1  | 1          |
| hsa-miR-6837 NM_005896   | IDH1  | 1          |
| hsa-miR-6846 NM_005896   | IDH1  | 1          |
| hsa-miR-6769 NM_005896   | IDH1  | 1          |
| hsa-miR-6865 NM_005896   | IDH1  | 1          |
| hsa-miR-6878 NM_005896   | IDH1  | 1          |
| hsa-miR-6879 NM_005896   | IDH1  | 1          |
| hsa-miR-6880 NM_005896   | IDH1  | 1          |
| hsa-miR-6891 NM_005896   | IDH1  | 1          |
| hsa-miR-6895 NM_005896   | IDH1  | 1          |
| hsa-miR-6895 NM_005896   | IDH1  | 1          |
| hsa-miR-7111 NM_005896   | IDH1  | 1          |
| hsa-miR-7703 NM_005896   | IDH1  | 1          |
| hsa-miR-7846 NM_005896   | IDH1  | 1          |
| hsa-miR-7847 NM_005896   | IDH1  | 1          |
| hsa-miR-7974 NM_005896   | IDH1  | 1          |
| hsa-miR-8072 NM_005896   | IDH1  | 1          |
| hsa-miR-8072 NM_005896   | IDH1  | 1          |
| hsa-miR-8078 NM_005896   | IDH1  | 1          |
| hsa-miR-8078 NM_005896   | IDH1  | 1          |
| hsa-miR-8085 NM_005896   | IDH1  | 1          |
| hsa-miR-1118 NM_005896   | IDH1  | 1          |
| hsa-miR-1211 NM_005896   | IDH1  | 1          |
| hsa-miR-99a- NM_0012824  | KRT23 | 0.9512821  |
| hsa-miR-767- NM_0012824  | KRT23 | 0.96153846 |
| hsa-miR-4421 NM_0012824  | KRT23 | 0.96153846 |
| hsa-miR-6777 NM_0012824  | KRT23 | 0.96153846 |
| hsa-miR-1211 NM_0012824  | KRT23 | 0.96153846 |
| hsa-miR-6804 NM_0012824  | KRT23 | 0.98076923 |
| hsa-miR-25-5j NM_0012824 | KRT23 | 1          |
| hsa-miR-28-5j NM_0012824 | KRT23 | 1          |
| hsa-miR-30b- NM_0012824  | KRT23 | 1          |
| hsa-miR-130a NM_0012824  | KRT23 | 1          |
| hsa-miR-365b NM_0012824  | KRT23 | 1          |

|               |            |       |            |
|---------------|------------|-------|------------|
| hsa-miR-410-  | NM_0012824 | KRT23 | 1          |
| hsa-miR-181d  | NM_0012824 | KRT23 | 1          |
| hsa-miR-509-  | NM_0012824 | KRT23 | 1          |
| hsa-miR-590-  | NM_0012824 | KRT23 | 1          |
| hsa-miR-611   | NM_0012824 | KRT23 | 1          |
| hsa-miR-658   | NM_0012824 | KRT23 | 1          |
| hsa-miR-1296  | NM_0012824 | KRT23 | 1          |
| hsa-miR-708-  | NM_0012824 | KRT23 | 1          |
| hsa-miR-760   | NM_0012824 | KRT23 | 1          |
| hsa-miR-937-  | NM_0012824 | KRT23 | 1          |
| hsa-miR-1202  | NM_0012824 | KRT23 | 1          |
| hsa-miR-1295  | NM_0012824 | KRT23 | 1          |
| hsa-miR-1304  | NM_0012824 | KRT23 | 1          |
| hsa-miR-3189  | NM_0012824 | KRT23 | 1          |
| hsa-miR-3197  | NM_0012824 | KRT23 | 1          |
| hsa-miR-4257  | NM_0012824 | KRT23 | 1          |
| hsa-miR-4285  | NM_0012824 | KRT23 | 1          |
| hsa-miR-3614  | NM_0012824 | KRT23 | 1          |
| hsa-miR-3936  | NM_0012824 | KRT23 | 1          |
| hsa-miR-4447  | NM_0012824 | KRT23 | 1          |
| hsa-miR-445C  | NM_0012824 | KRT23 | 1          |
| hsa-miR-4476  | NM_0012824 | KRT23 | 1          |
| hsa-miR-449C  | NM_0012824 | KRT23 | 1          |
| hsa-miR-4527  | NM_0012824 | KRT23 | 1          |
| hsa-miR-453C  | NM_0012824 | KRT23 | 1          |
| hsa-miR-396C  | NM_0012824 | KRT23 | 1          |
| hsa-miR-4654  | NM_0012824 | KRT23 | 1          |
| hsa-miR-4721  | NM_0012824 | KRT23 | 1          |
| hsa-miR-4758  | NM_0012824 | KRT23 | 1          |
| hsa-miR-501C  | NM_0012824 | KRT23 | 1          |
| hsa-miR-5194  | NM_0012824 | KRT23 | 1          |
| hsa-miR-6075  | NM_0012824 | KRT23 | 1          |
| hsa-miR-6086  | NM_0012824 | KRT23 | 1          |
| hsa-miR-6717  | NM_0012824 | KRT23 | 1          |
| hsa-miR-6726  | NM_0012824 | KRT23 | 1          |
| hsa-miR-6764  | NM_0012824 | KRT23 | 1          |
| hsa-miR-6788  | NM_0012824 | KRT23 | 1          |
| hsa-miR-6791  | NM_0012824 | KRT23 | 1          |
| hsa-miR-6795  | NM_0012824 | KRT23 | 1          |
| hsa-miR-6827  | NM_0012824 | KRT23 | 1          |
| hsa-miR-6847  | NM_0012824 | KRT23 | 1          |
| hsa-miR-6866  | NM_0012824 | KRT23 | 1          |
| hsa-miR-6868  | NM_0012824 | KRT23 | 1          |
| hsa-miR-6886  | NM_0012824 | KRT23 | 1          |
| hsa-miR-1273  | NM_0012824 | KRT23 | 1          |
| hsa-miR-8068  | NM_0012824 | KRT23 | 1          |
| hsa-miR-8072  | NM_0012824 | KRT23 | 1          |
| hsa-miR-808C  | NM_0012824 | KRT23 | 1          |
| hsa-miR-1052  | NM_0012824 | KRT23 | 1          |
| hsa-miR-1052  | NM_0012824 | KRT23 | 1          |
| hsa-miR-1211  | NM_0012824 | KRT23 | 1          |
| hsa-miR-99a-  | NM_015515  | KRT23 | 1          |
| hsa-miR-27b-  | NM_015515  | KRT23 | 1          |
| hsa-miR-130a  | NM_015515  | KRT23 | 1          |
| hsa-miR-653-  | NM_015515  | KRT23 | 1          |
| hsa-miR-1296  | NM_015515  | KRT23 | 1          |
| hsa-miR-937-  | NM_015515  | KRT23 | 1          |
| hsa-miR-1202  | NM_015515  | KRT23 | 1          |
| hsa-miR-1304  | NM_015515  | KRT23 | 1          |
| hsa-miR-3129  | NM_015515  | KRT23 | 1          |
| hsa-miR-3155  | NM_015515  | KRT23 | 1          |
| hsa-miR-3614  | NM_015515  | KRT23 | 1          |
| hsa-miR-442C  | NM_015515  | KRT23 | 1          |
| hsa-miR-445C  | NM_015515  | KRT23 | 1          |
| hsa-miR-453C  | NM_015515  | KRT23 | 1          |
| hsa-miR-4638  | NM_015515  | KRT23 | 1          |
| hsa-miR-4647  | NM_015515  | KRT23 | 1          |
| hsa-miR-479C  | NM_015515  | KRT23 | 1          |
| hsa-miR-5009  | NM_015515  | KRT23 | 1          |
| hsa-miR-5194  | NM_015515  | KRT23 | 1          |
| hsa-miR-6734  | NM_015515  | KRT23 | 1          |
| hsa-miR-6776  | NM_015515  | KRT23 | 1          |
| hsa-miR-6788  | NM_015515  | KRT23 | 1          |
| hsa-miR-6866  | NM_015515  | KRT23 | 1          |
| hsa-miR-6868  | NM_015515  | KRT23 | 1          |
| hsa-miR-6873  | NM_015515  | KRT23 | 1          |
| hsa-miR-1273  | NM_015515  | KRT23 | 1          |
| hsa-miR-8068  | NM_015515  | KRT23 | 1          |
| hsa-miR-1052  | NM_015515  | KRT23 | 1          |
| hsa-miR-1275  | NM_0012825 | MUC20 | 0.96153846 |
| hsa-miR-514a  | NM_0012825 | MUC20 | 0.97435897 |
| hsa-miR-7704  | NM_0012825 | MUC20 | 0.97435897 |
| hsa-miR-1225  | NM_0012825 | MUC20 | 0.98076923 |
| hsa-miR-1233  | NM_0012825 | MUC20 | 0.98076923 |
| hsa-miR-1292  | NM_0012825 | MUC20 | 0.98076923 |
| hsa-miR-3665  | NM_0012825 | MUC20 | 0.98076923 |
| hsa-let-7d-3p | NM_0012825 | MUC20 | 1          |
| hsa-miR-24-2  | NM_0012825 | MUC20 | 1          |
| hsa-miR-103a  | NM_0012825 | MUC20 | 1          |
| hsa-miR-210-  | NM_0012825 | MUC20 | 1          |
| hsa-miR-125t  | NM_0012825 | MUC20 | 1          |
| hsa-miR-128-  | NM_0012825 | MUC20 | 1          |
| hsa-miR-299-  | NM_0012825 | MUC20 | 1          |
| hsa-miR-296-  | NM_0012825 | MUC20 | 1          |

|                                |   |
|--------------------------------|---|
| hsa-miR-365t NM_0012825 MUC20  | 1 |
| hsa-miR-365t NM_0012825 MUC20  | 1 |
| hsa-miR-448 NM_0012825 MUC20   | 1 |
| hsa-miR-202- NM_0012825 MUC20  | 1 |
| hsa-miR-181d NM_0012825 MUC20  | 1 |
| hsa-miR-515- NM_0012825 MUC20  | 1 |
| hsa-miR-523- NM_0012825 MUC20  | 1 |
| hsa-miR-518c NM_0012825 MUC20  | 1 |
| hsa-miR-517- NM_0012825 MUC20  | 1 |
| hsa-miR-518a NM_0012825 MUC20  | 1 |
| hsa-miR-527 NM_0012825 MUC20   | 1 |
| hsa-miR-500a NM_0012825 MUC20  | 1 |
| hsa-miR-509- NM_0012825 MUC20  | 1 |
| hsa-miR-455- NM_0012825 MUC20  | 1 |
| hsa-miR-92b- NM_0012825 MUC20  | 1 |
| hsa-miR-588 NM_0012825 MUC20   | 1 |
| hsa-miR-550a NM_0012825 MUC20  | 1 |
| hsa-miR-595 NM_0012825 MUC20   | 1 |
| hsa-miR-619- NM_0012825 MUC20  | 1 |
| hsa-miR-619- NM_0012825 MUC20  | 1 |
| hsa-miR-619- NM_0012825 MUC20  | 1 |
| hsa-miR-33b- NM_0012825 MUC20  | 1 |
| hsa-miR-650 NM_0012825 MUC20   | 1 |
| hsa-miR-744- NM_0012825 MUC20  | 1 |
| hsa-miR-744- NM_0012825 MUC20  | 1 |
| hsa-miR-548j- NM_0012825 MUC20 | 1 |
| hsa-miR-1295 NM_0012825 MUC20  | 1 |
| hsa-miR-147c NM_0012825 MUC20  | 1 |
| hsa-miR-3135 NM_0012825 MUC20  | 1 |
| hsa-miR-3151 NM_0012825 MUC20  | 1 |
| hsa-miR-3158 NM_0012825 MUC20  | 1 |
| hsa-miR-3162 NM_0012825 MUC20  | 1 |
| hsa-miR-514t NM_0012825 MUC20  | 1 |
| hsa-miR-4314 NM_0012825 MUC20  | 1 |
| hsa-miR-427c NM_0012825 MUC20  | 1 |
| hsa-miR-4277 NM_0012825 MUC20  | 1 |
| hsa-miR-3622 NM_0012825 MUC20  | 1 |
| hsa-miR-368c NM_0012825 MUC20  | 1 |
| hsa-miR-3907 NM_0012825 MUC20  | 1 |
| hsa-miR-3912 NM_0012825 MUC20  | 1 |
| hsa-miR-3937 NM_0012825 MUC20  | 1 |
| hsa-miR-4437 NM_0012825 MUC20  | 1 |
| hsa-miR-444c NM_0012825 MUC20  | 1 |
| hsa-miR-4484 NM_0012825 MUC20  | 1 |
| hsa-miR-3978 NM_0012825 MUC20  | 1 |
| hsa-miR-4649 NM_0012825 MUC20  | 1 |
| hsa-miR-4651 NM_0012825 MUC20  | 1 |
| hsa-miR-4653 NM_0012825 MUC20  | 1 |
| hsa-miR-466c NM_0012825 MUC20  | 1 |
| hsa-miR-4673 NM_0012825 MUC20  | 1 |
| hsa-miR-4674 NM_0012825 MUC20  | 1 |
| hsa-miR-4697 NM_0012825 MUC20  | 1 |
| hsa-miR-4704 NM_0012825 MUC20  | 1 |
| hsa-miR-4708 NM_0012825 MUC20  | 1 |
| hsa-miR-4715 NM_0012825 MUC20  | 1 |
| hsa-miR-4721 NM_0012825 MUC20  | 1 |
| hsa-miR-4732 NM_0012825 MUC20  | 1 |
| hsa-miR-3064 NM_0012825 MUC20  | 1 |
| hsa-miR-4761 NM_0012825 MUC20  | 1 |
| hsa-miR-4769 NM_0012825 MUC20  | 1 |
| hsa-miR-4436 NM_0012825 MUC20  | 1 |
| hsa-miR-5007 NM_0012825 MUC20  | 1 |
| hsa-miR-5572 NM_0012825 MUC20  | 1 |
| hsa-miR-5589 NM_0012825 MUC20  | 1 |
| hsa-miR-6075 NM_0012825 MUC20  | 1 |
| hsa-miR-6085 NM_0012825 MUC20  | 1 |
| hsa-miR-609c NM_0012825 MUC20  | 1 |
| hsa-miR-6504 NM_0012825 MUC20  | 1 |
| hsa-miR-6721 NM_0012825 MUC20  | 1 |
| hsa-miR-6734 NM_0012825 MUC20  | 1 |
| hsa-miR-6736 NM_0012825 MUC20  | 1 |
| hsa-miR-6736 NM_0012825 MUC20  | 1 |
| hsa-miR-6743 NM_0012825 MUC20  | 1 |
| hsa-miR-6752 NM_0012825 MUC20  | 1 |
| hsa-miR-676c NM_0012825 MUC20  | 1 |
| hsa-miR-6769 NM_0012825 MUC20  | 1 |
| hsa-miR-6773 NM_0012825 MUC20  | 1 |
| hsa-miR-6776 NM_0012825 MUC20  | 1 |
| hsa-miR-6778 NM_0012825 MUC20  | 1 |
| hsa-miR-6833 NM_0012825 MUC20  | 1 |
| hsa-miR-6846 NM_0012825 MUC20  | 1 |
| hsa-miR-6852 NM_0012825 MUC20  | 1 |
| hsa-miR-6855 NM_0012825 MUC20  | 1 |
| hsa-miR-6857 NM_0012825 MUC20  | 1 |
| hsa-miR-6861 NM_0012825 MUC20  | 1 |
| hsa-miR-6875 NM_0012825 MUC20  | 1 |
| hsa-miR-7112 NM_0012825 MUC20  | 1 |
| hsa-miR-7114 NM_0012825 MUC20  | 1 |
| hsa-miR-7155 NM_0012825 MUC20  | 1 |
| hsa-miR-1022 NM_0012825 MUC20  | 1 |
| hsa-miR-104c NM_0012825 MUC20  | 1 |
| hsa-miR-1139 NM_0012825 MUC20  | 1 |
| hsa-miR-3059 NM_0012825 MUC20  | 1 |
| hsa-miR-9851 NM_0012825 MUC20  | 1 |

|                                |            |
|--------------------------------|------------|
| hsa-miR-6804 NM_0012843 ANLN   | 0.95384615 |
| hsa-miR-6804 NM_018685 ANLN    | 0.95384615 |
| hsa-miR-1225 NM_0012843 ANLN   | 0.96153846 |
| hsa-miR-4636 NM_0012843 ANLN   | 0.96153846 |
| hsa-miR-5694 NM_0012843 ANLN   | 0.96153846 |
| hsa-miR-6895 NM_0012843 ANLN   | 0.96153846 |
| hsa-miR-1225 NM_018685 ANLN    | 0.96153846 |
| hsa-miR-4636 NM_018685 ANLN    | 0.96153846 |
| hsa-miR-5694 NM_018685 ANLN    | 0.96153846 |
| hsa-miR-6895 NM_018685 ANLN    | 0.96153846 |
| hsa-let-7a-2-3 NM_0012843 ANLN | 1          |
| hsa-let-7a-2-3 NM_0012843 ANLN | 1          |
| hsa-let-7e-3p NM_0012843 ANLN  | 1          |
| hsa-miR-15a- NM_0012843 ANLN   | 1          |
| hsa-miR-95-3j NM_0012843 ANLN  | 1          |
| hsa-miR-29b- NM_0012843 ANLN   | 1          |
| hsa-miR-148a NM_0012843 ANLN   | 1          |
| hsa-miR-204- NM_0012843 ANLN   | 1          |
| hsa-miR-215- NM_0012843 ANLN   | 1          |
| hsa-miR-224- NM_0012843 ANLN   | 1          |
| hsa-miR-153- NM_0012843 ANLN   | 1          |
| hsa-miR-154- NM_0012843 ANLN   | 1          |
| hsa-miR-375- NM_0012843 ANLN   | 1          |
| hsa-miR-342- NM_0012843 ANLN   | 1          |
| hsa-miR-339- NM_0012843 ANLN   | 1          |
| hsa-miR-424- NM_0012843 ANLN   | 1          |
| hsa-miR-431- NM_0012843 ANLN   | 1          |
| hsa-miR-492 NM_0012843 ANLN    | 1          |
| hsa-miR-193b NM_0012843 ANLN   | 1          |
| hsa-miR-497- NM_0012843 ANLN   | 1          |
| hsa-miR-508- NM_0012843 ANLN   | 1          |
| hsa-miR-455- NM_0012843 ANLN   | 1          |
| hsa-miR-556- NM_0012843 ANLN   | 1          |
| hsa-miR-622 NM_0012843 ANLN    | 1          |
| hsa-miR-660- NM_0012843 ANLN   | 1          |
| hsa-miR-1264 NM_0012843 ANLN   | 1          |
| hsa-miR-1301 NM_0012843 ANLN   | 1          |
| hsa-miR-764 NM_0012843 ANLN    | 1          |
| hsa-miR-675- NM_0012843 ANLN   | 1          |
| hsa-miR-885- NM_0012843 ANLN   | 1          |
| hsa-miR-885- NM_0012843 ANLN   | 1          |
| hsa-miR-943 NM_0012843 ANLN    | 1          |
| hsa-miR-1228 NM_0012843 ANLN   | 1          |
| hsa-miR-1229 NM_0012843 ANLN   | 1          |
| hsa-miR-1200 NM_0012843 ANLN   | 1          |
| hsa-miR-1285 NM_0012843 ANLN   | 1          |
| hsa-miR-1268 NM_0012843 ANLN   | 1          |
| hsa-miR-1284 NM_0012843 ANLN   | 1          |
| hsa-miR-513b NM_0012843 ANLN   | 1          |
| hsa-miR-3117 NM_0012843 ANLN   | 1          |
| hsa-miR-3132 NM_0012843 ANLN   | 1          |
| hsa-miR-1273 NM_0012843 ANLN   | 1          |
| hsa-miR-3148 NM_0012843 ANLN   | 1          |
| hsa-miR-3152 NM_0012843 ANLN   | 1          |
| hsa-miR-3170 NM_0012843 ANLN   | 1          |
| hsa-miR-3184 NM_0012843 ANLN   | 1          |
| hsa-miR-3614 NM_0012843 ANLN   | 1          |
| hsa-miR-3664 NM_0012843 ANLN   | 1          |
| hsa-miR-3685 NM_0012843 ANLN   | 1          |
| hsa-miR-3691 NM_0012843 ANLN   | 1          |
| hsa-miR-3691 NM_0012843 ANLN   | 1          |
| hsa-miR-3714 NM_0012843 ANLN   | 1          |
| hsa-miR-3689 NM_0012843 ANLN   | 1          |
| hsa-miR-3912 NM_0012843 ANLN   | 1          |
| hsa-miR-3921 NM_0012843 ANLN   | 1          |
| hsa-miR-676- NM_0012843 ANLN   | 1          |
| hsa-miR-3929 NM_0012843 ANLN   | 1          |
| hsa-miR-3943 NM_0012843 ANLN   | 1          |
| hsa-miR-442C NM_0012843 ANLN   | 1          |
| hsa-miR-4443 NM_0012843 ANLN   | 1          |
| hsa-miR-3689 NM_0012843 ANLN   | 1          |
| hsa-miR-4524 NM_0012843 ANLN   | 1          |
| hsa-miR-464C NM_0012843 ANLN   | 1          |
| hsa-miR-4641 NM_0012843 ANLN   | 1          |
| hsa-miR-465C NM_0012843 ANLN   | 1          |
| hsa-miR-4659 NM_0012843 ANLN   | 1          |
| hsa-miR-468C NM_0012843 ANLN   | 1          |
| hsa-miR-4714 NM_0012843 ANLN   | 1          |
| hsa-miR-4715 NM_0012843 ANLN   | 1          |
| hsa-miR-4725 NM_0012843 ANLN   | 1          |
| hsa-miR-4726 NM_0012843 ANLN   | 1          |
| hsa-miR-4733 NM_0012843 ANLN   | 1          |
| hsa-miR-371b NM_0012843 ANLN   | 1          |
| hsa-miR-4757 NM_0012843 ANLN   | 1          |
| hsa-miR-4776 NM_0012843 ANLN   | 1          |
| hsa-miR-5001 NM_0012843 ANLN   | 1          |
| hsa-miR-5002 NM_0012843 ANLN   | 1          |
| hsa-miR-5006 NM_0012843 ANLN   | 1          |
| hsa-miR-5008 NM_0012843 ANLN   | 1          |
| hsa-miR-5010 NM_0012843 ANLN   | 1          |
| hsa-miR-5011 NM_0012843 ANLN   | 1          |
| hsa-miR-5197 NM_0012843 ANLN   | 1          |
| hsa-miR-4524 NM_0012843 ANLN   | 1          |
| hsa-miR-664b NM_0012843 ANLN   | 1          |

|                               |   |
|-------------------------------|---|
| hsa-miR-5705 NM_0012843 ANLN  | 1 |
| hsa-miR-5735 NM_0012843 ANLN  | 1 |
| hsa-miR-6165 NM_0012843 ANLN  | 1 |
| hsa-miR-6735 NM_0012843 ANLN  | 1 |
| hsa-miR-6737 NM_0012843 ANLN  | 1 |
| hsa-miR-6741 NM_0012843 ANLN  | 1 |
| hsa-miR-6753 NM_0012843 ANLN  | 1 |
| hsa-miR-6760 NM_0012843 ANLN  | 1 |
| hsa-miR-6762 NM_0012843 ANLN  | 1 |
| hsa-miR-6767 NM_0012843 ANLN  | 1 |
| hsa-miR-6774 NM_0012843 ANLN  | 1 |
| hsa-miR-6778 NM_0012843 ANLN  | 1 |
| hsa-miR-6781 NM_0012843 ANLN  | 1 |
| hsa-miR-6782 NM_0012843 ANLN  | 1 |
| hsa-miR-6791 NM_0012843 ANLN  | 1 |
| hsa-miR-6793 NM_0012843 ANLN  | 1 |
| hsa-miR-6802 NM_0012843 ANLN  | 1 |
| hsa-miR-6818 NM_0012843 ANLN  | 1 |
| hsa-miR-6827 NM_0012843 ANLN  | 1 |
| hsa-miR-6835 NM_0012843 ANLN  | 1 |
| hsa-miR-6780 NM_0012843 ANLN  | 1 |
| hsa-miR-6836 NM_0012843 ANLN  | 1 |
| hsa-miR-6835 NM_0012843 ANLN  | 1 |
| hsa-miR-6846 NM_0012843 ANLN  | 1 |
| hsa-miR-6847 NM_0012843 ANLN  | 1 |
| hsa-miR-6845 NM_0012843 ANLN  | 1 |
| hsa-miR-6852 NM_0012843 ANLN  | 1 |
| hsa-miR-6855 NM_0012843 ANLN  | 1 |
| hsa-miR-6855 NM_0012843 ANLN  | 1 |
| hsa-miR-6872 NM_0012843 ANLN  | 1 |
| hsa-miR-6893 NM_0012843 ANLN  | 1 |
| hsa-miR-7112 NM_0012843 ANLN  | 1 |
| hsa-miR-7845 NM_0012843 ANLN  | 1 |
| hsa-miR-7855 NM_0012843 ANLN  | 1 |
| hsa-miR-8083 NM_0012843 ANLN  | 1 |
| hsa-let-7a-2-3 NM_018685 ANLN | 1 |
| hsa-let-7a-2-3 NM_018685 ANLN | 1 |
| hsa-let-7e-3p NM_018685 ANLN  | 1 |
| hsa-miR-15a- NM_018685 ANLN   | 1 |
| hsa-miR-95-3j NM_018685 ANLN  | 1 |
| hsa-miR-29b- NM_018685 ANLN   | 1 |
| hsa-miR-148a NM_018685 ANLN   | 1 |
| hsa-miR-204- NM_018685 ANLN   | 1 |
| hsa-miR-215- NM_018685 ANLN   | 1 |
| hsa-miR-224- NM_018685 ANLN   | 1 |
| hsa-miR-153- NM_018685 ANLN   | 1 |
| hsa-miR-154- NM_018685 ANLN   | 1 |
| hsa-miR-375- NM_018685 ANLN   | 1 |
| hsa-miR-342- NM_018685 ANLN   | 1 |
| hsa-miR-339- NM_018685 ANLN   | 1 |
| hsa-miR-424- NM_018685 ANLN   | 1 |
| hsa-miR-431- NM_018685 ANLN   | 1 |
| hsa-miR-492 NM_018685 ANLN    | 1 |
| hsa-miR-193b NM_018685 ANLN   | 1 |
| hsa-miR-497- NM_018685 ANLN   | 1 |
| hsa-miR-508- NM_018685 ANLN   | 1 |
| hsa-miR-455- NM_018685 ANLN   | 1 |
| hsa-miR-556- NM_018685 ANLN   | 1 |
| hsa-miR-622 NM_018685 ANLN    | 1 |
| hsa-miR-660- NM_018685 ANLN   | 1 |
| hsa-miR-1264 NM_018685 ANLN   | 1 |
| hsa-miR-1301 NM_018685 ANLN   | 1 |
| hsa-miR-764 NM_018685 ANLN    | 1 |
| hsa-miR-675- NM_018685 ANLN   | 1 |
| hsa-miR-885- NM_018685 ANLN   | 1 |
| hsa-miR-885- NM_018685 ANLN   | 1 |
| hsa-miR-943 NM_018685 ANLN    | 1 |
| hsa-miR-1228 NM_018685 ANLN   | 1 |
| hsa-miR-1225 NM_018685 ANLN   | 1 |
| hsa-miR-1200 NM_018685 ANLN   | 1 |
| hsa-miR-1285 NM_018685 ANLN   | 1 |
| hsa-miR-1268 NM_018685 ANLN   | 1 |
| hsa-miR-1284 NM_018685 ANLN   | 1 |
| hsa-miR-513b NM_018685 ANLN   | 1 |
| hsa-miR-3117 NM_018685 ANLN   | 1 |
| hsa-miR-3132 NM_018685 ANLN   | 1 |
| hsa-miR-1273 NM_018685 ANLN   | 1 |
| hsa-miR-3148 NM_018685 ANLN   | 1 |
| hsa-miR-3152 NM_018685 ANLN   | 1 |
| hsa-miR-3170 NM_018685 ANLN   | 1 |
| hsa-miR-3184 NM_018685 ANLN   | 1 |
| hsa-miR-3614 NM_018685 ANLN   | 1 |
| hsa-miR-3664 NM_018685 ANLN   | 1 |
| hsa-miR-3685 NM_018685 ANLN   | 1 |
| hsa-miR-3691 NM_018685 ANLN   | 1 |
| hsa-miR-3691 NM_018685 ANLN   | 1 |
| hsa-miR-3714 NM_018685 ANLN   | 1 |
| hsa-miR-3685 NM_018685 ANLN   | 1 |
| hsa-miR-3912 NM_018685 ANLN   | 1 |
| hsa-miR-3921 NM_018685 ANLN   | 1 |
| hsa-miR-676- NM_018685 ANLN   | 1 |
| hsa-miR-3925 NM_018685 ANLN   | 1 |
| hsa-miR-3943 NM_018685 ANLN   | 1 |
| hsa-miR-4420 NM_018685 ANLN   | 1 |

|              |            |         |            |
|--------------|------------|---------|------------|
| hsa-miR-4443 | NM_018685  | ANLN    | 1          |
| hsa-miR-3685 | NM_018685  | ANLN    | 1          |
| hsa-miR-4524 | NM_018685  | ANLN    | 1          |
| hsa-miR-464C | NM_018685  | ANLN    | 1          |
| hsa-miR-4641 | NM_018685  | ANLN    | 1          |
| hsa-miR-465C | NM_018685  | ANLN    | 1          |
| hsa-miR-4655 | NM_018685  | ANLN    | 1          |
| hsa-miR-468C | NM_018685  | ANLN    | 1          |
| hsa-miR-4714 | NM_018685  | ANLN    | 1          |
| hsa-miR-4715 | NM_018685  | ANLN    | 1          |
| hsa-miR-4725 | NM_018685  | ANLN    | 1          |
| hsa-miR-4726 | NM_018685  | ANLN    | 1          |
| hsa-miR-4733 | NM_018685  | ANLN    | 1          |
| hsa-miR-371b | NM_018685  | ANLN    | 1          |
| hsa-miR-4757 | NM_018685  | ANLN    | 1          |
| hsa-miR-4776 | NM_018685  | ANLN    | 1          |
| hsa-miR-5001 | NM_018685  | ANLN    | 1          |
| hsa-miR-5002 | NM_018685  | ANLN    | 1          |
| hsa-miR-5006 | NM_018685  | ANLN    | 1          |
| hsa-miR-5008 | NM_018685  | ANLN    | 1          |
| hsa-miR-501C | NM_018685  | ANLN    | 1          |
| hsa-miR-5011 | NM_018685  | ANLN    | 1          |
| hsa-miR-5197 | NM_018685  | ANLN    | 1          |
| hsa-miR-4524 | NM_018685  | ANLN    | 1          |
| hsa-miR-664b | NM_018685  | ANLN    | 1          |
| hsa-miR-5705 | NM_018685  | ANLN    | 1          |
| hsa-miR-5735 | NM_018685  | ANLN    | 1          |
| hsa-miR-6165 | NM_018685  | ANLN    | 1          |
| hsa-miR-6735 | NM_018685  | ANLN    | 1          |
| hsa-miR-6737 | NM_018685  | ANLN    | 1          |
| hsa-miR-6741 | NM_018685  | ANLN    | 1          |
| hsa-miR-6753 | NM_018685  | ANLN    | 1          |
| hsa-miR-676C | NM_018685  | ANLN    | 1          |
| hsa-miR-6762 | NM_018685  | ANLN    | 1          |
| hsa-miR-6767 | NM_018685  | ANLN    | 1          |
| hsa-miR-6774 | NM_018685  | ANLN    | 1          |
| hsa-miR-6778 | NM_018685  | ANLN    | 1          |
| hsa-miR-6781 | NM_018685  | ANLN    | 1          |
| hsa-miR-6782 | NM_018685  | ANLN    | 1          |
| hsa-miR-6791 | NM_018685  | ANLN    | 1          |
| hsa-miR-6793 | NM_018685  | ANLN    | 1          |
| hsa-miR-6802 | NM_018685  | ANLN    | 1          |
| hsa-miR-6818 | NM_018685  | ANLN    | 1          |
| hsa-miR-6827 | NM_018685  | ANLN    | 1          |
| hsa-miR-6835 | NM_018685  | ANLN    | 1          |
| hsa-miR-678C | NM_018685  | ANLN    | 1          |
| hsa-miR-6836 | NM_018685  | ANLN    | 1          |
| hsa-miR-6835 | NM_018685  | ANLN    | 1          |
| hsa-miR-6846 | NM_018685  | ANLN    | 1          |
| hsa-miR-6847 | NM_018685  | ANLN    | 1          |
| hsa-miR-6845 | NM_018685  | ANLN    | 1          |
| hsa-miR-6852 | NM_018685  | ANLN    | 1          |
| hsa-miR-6855 | NM_018685  | ANLN    | 1          |
| hsa-miR-6855 | NM_018685  | ANLN    | 1          |
| hsa-miR-6872 | NM_018685  | ANLN    | 1          |
| hsa-miR-6893 | NM_018685  | ANLN    | 1          |
| hsa-miR-7112 | NM_018685  | ANLN    | 1          |
| hsa-miR-7845 | NM_018685  | ANLN    | 1          |
| hsa-miR-7855 | NM_018685  | ANLN    | 1          |
| hsa-miR-8083 | NM_018685  | ANLN    | 1          |
| hsa-miR-6504 | NM_0012862 | RALGPS2 | 0.95384615 |
| hsa-miR-645  | NM_152663  | RALGPS2 | 0.95384615 |
| hsa-miR-394C | NM_152663  | RALGPS2 | 0.95384615 |
| hsa-miR-30d- | NM_0012862 | RALGPS2 | 0.96153846 |
| hsa-miR-422a | NM_0012862 | RALGPS2 | 0.96153846 |
| hsa-miR-654- | NM_0012862 | RALGPS2 | 0.96153846 |
| hsa-miR-550a | NM_0012862 | RALGPS2 | 0.96153846 |
| hsa-miR-887- | NM_0012862 | RALGPS2 | 0.96153846 |
| hsa-miR-921  | NM_0012862 | RALGPS2 | 0.96153846 |
| hsa-miR-1281 | NM_0012862 | RALGPS2 | 0.96153846 |
| hsa-miR-3192 | NM_0012862 | RALGPS2 | 0.96153846 |
| hsa-miR-4286 | NM_0012862 | RALGPS2 | 0.96153846 |
| hsa-miR-3605 | NM_0012862 | RALGPS2 | 0.96153846 |
| hsa-miR-3621 | NM_0012862 | RALGPS2 | 0.96153846 |
| hsa-miR-394C | NM_0012862 | RALGPS2 | 0.96153846 |
| hsa-miR-3945 | NM_0012862 | RALGPS2 | 0.96153846 |
| hsa-miR-4437 | NM_0012862 | RALGPS2 | 0.96153846 |
| hsa-miR-4652 | NM_0012862 | RALGPS2 | 0.96153846 |
| hsa-miR-5002 | NM_0012862 | RALGPS2 | 0.96153846 |
| hsa-miR-5187 | NM_0012862 | RALGPS2 | 0.96153846 |
| hsa-miR-6733 | NM_0012862 | RALGPS2 | 0.96153846 |
| hsa-miR-678C | NM_0012862 | RALGPS2 | 0.96153846 |
| hsa-miR-6822 | NM_0012862 | RALGPS2 | 0.96153846 |
| hsa-miR-6883 | NM_0012862 | RALGPS2 | 0.96153846 |
| hsa-miR-1035 | NM_0012862 | RALGPS2 | 0.96153846 |
| hsa-miR-1035 | NM_0012862 | RALGPS2 | 0.96153846 |
| hsa-miR-30d- | NM_152663  | RALGPS2 | 0.96153846 |
| hsa-miR-422a | NM_152663  | RALGPS2 | 0.96153846 |
| hsa-miR-1285 | NM_152663  | RALGPS2 | 0.96153846 |
| hsa-miR-1246 | NM_152663  | RALGPS2 | 0.96153846 |
| hsa-miR-1281 | NM_152663  | RALGPS2 | 0.96153846 |
| hsa-miR-3621 | NM_152663  | RALGPS2 | 0.96153846 |
| hsa-miR-394C | NM_152663  | RALGPS2 | 0.96153846 |
| hsa-miR-3945 | NM_152663  | RALGPS2 | 0.96153846 |

|               |            |         |            |
|---------------|------------|---------|------------|
| hsa-miR-4664  | NM_152663  | RALGPS2 | 0.96153846 |
| hsa-miR-5002  | NM_152663  | RALGPS2 | 0.96153846 |
| hsa-miR-5187  | NM_152663  | RALGPS2 | 0.96153846 |
| hsa-miR-5585  | NM_152663  | RALGPS2 | 0.96153846 |
| hsa-miR-6733  | NM_152663  | RALGPS2 | 0.96153846 |
| hsa-miR-6780  | NM_152663  | RALGPS2 | 0.96153846 |
| hsa-miR-6784  | NM_152663  | RALGPS2 | 0.96153846 |
| hsa-miR-6808  | NM_152663  | RALGPS2 | 0.96153846 |
| hsa-miR-7154  | NM_152663  | RALGPS2 | 0.96153846 |
| hsa-miR-1035  | NM_152663  | RALGPS2 | 0.96153846 |
| hsa-miR-3291  | NM_152663  | RALGPS2 | 0.96923077 |
| hsa-miR-412-  | NM_0012862 | RALGPS2 | 0.97435897 |
| hsa-miR-500b  | NM_0012862 | RALGPS2 | 0.97435897 |
| hsa-miR-6750  | NM_0012862 | RALGPS2 | 0.97435897 |
| hsa-miR-3177  | NM_152663  | RALGPS2 | 0.97435897 |
| hsa-miR-4265  | NM_152663  | RALGPS2 | 0.97435897 |
| hsa-miR-6750  | NM_152663  | RALGPS2 | 0.97435897 |
| hsa-miR-6830  | NM_152663  | RALGPS2 | 0.97435897 |
| hsa-miR-520g  | NM_0012862 | RALGPS2 | 0.97435897 |
| hsa-miR-1260  | NM_0012862 | RALGPS2 | 0.97435897 |
| hsa-miR-520g  | NM_152663  | RALGPS2 | 0.97435897 |
| hsa-miR-4481  | NM_152663  | RALGPS2 | 0.97435897 |
| hsa-miR-921   | NM_0012862 | RALGPS2 | 0.98076923 |
| hsa-miR-1288  | NM_0012862 | RALGPS2 | 0.98076923 |
| hsa-miR-3141  | NM_0012862 | RALGPS2 | 0.98076923 |
| hsa-miR-6746  | NM_0012862 | RALGPS2 | 0.98076923 |
| hsa-miR-9851  | NM_0012862 | RALGPS2 | 0.98076923 |
| hsa-miR-149-  | NM_152663  | RALGPS2 | 0.98076923 |
| hsa-miR-921   | NM_152663  | RALGPS2 | 0.98076923 |
| hsa-miR-4534  | NM_152663  | RALGPS2 | 0.98076923 |
| hsa-miR-6738  | NM_152663  | RALGPS2 | 0.98076923 |
| hsa-miR-9851  | NM_152663  | RALGPS2 | 0.98076923 |
| hsa-miR-6827  | NM_0012862 | RALGPS2 | 0.98717949 |
| hsa-miR-6827  | NM_152663  | RALGPS2 | 0.98717949 |
| hsa-miR-1303  | NM_152663  | RALGPS2 | 0.98717949 |
| hsa-let-7a-5p | NM_0012862 | RALGPS2 | 1          |
| hsa-let-7c-5p | NM_0012862 | RALGPS2 | 1          |
| hsa-let-7c-5p | NM_0012862 | RALGPS2 | 1          |
| hsa-let-7d-5p | NM_0012862 | RALGPS2 | 1          |
| hsa-let-7e-5p | NM_0012862 | RALGPS2 | 1          |
| hsa-let-7e-5p | NM_0012862 | RALGPS2 | 1          |
| hsa-miR-18a-  | NM_0012862 | RALGPS2 | 1          |
| hsa-miR-19b-  | NM_0012862 | RALGPS2 | 1          |
| hsa-miR-21-5j | NM_0012862 | RALGPS2 | 1          |
| hsa-miR-21-3j | NM_0012862 | RALGPS2 | 1          |
| hsa-miR-25-5j | NM_0012862 | RALGPS2 | 1          |
| hsa-miR-26b-  | NM_0012862 | RALGPS2 | 1          |
| hsa-miR-31-5j | NM_0012862 | RALGPS2 | 1          |
| hsa-miR-33a-  | NM_0012862 | RALGPS2 | 1          |
| hsa-miR-33a-  | NM_0012862 | RALGPS2 | 1          |
| hsa-miR-92a-  | NM_0012862 | RALGPS2 | 1          |
| hsa-miR-92a-  | NM_0012862 | RALGPS2 | 1          |
| hsa-miR-96-5j | NM_0012862 | RALGPS2 | 1          |
| hsa-miR-99a-  | NM_0012862 | RALGPS2 | 1          |
| hsa-miR-103a  | NM_0012862 | RALGPS2 | 1          |
| hsa-miR-103a  | NM_0012862 | RALGPS2 | 1          |
| hsa-miR-192-  | NM_0012862 | RALGPS2 | 1          |
| hsa-miR-196a  | NM_0012862 | RALGPS2 | 1          |
| hsa-miR-197-  | NM_0012862 | RALGPS2 | 1          |
| hsa-miR-197-  | NM_0012862 | RALGPS2 | 1          |
| hsa-miR-198   | NM_0012862 | RALGPS2 | 1          |
| hsa-miR-129-  | NM_0012862 | RALGPS2 | 1          |
| hsa-miR-129-  | NM_0012862 | RALGPS2 | 1          |
| hsa-miR-129-  | NM_0012862 | RALGPS2 | 1          |
| hsa-miR-30c-  | NM_0012862 | RALGPS2 | 1          |
| hsa-miR-30c-  | NM_0012862 | RALGPS2 | 1          |
| hsa-miR-7-2-3 | NM_0012862 | RALGPS2 | 1          |
| hsa-miR-10a-  | NM_0012862 | RALGPS2 | 1          |
| hsa-miR-181a  | NM_0012862 | RALGPS2 | 1          |
| hsa-miR-182-  | NM_0012862 | RALGPS2 | 1          |
| hsa-miR-183-  | NM_0012862 | RALGPS2 | 1          |
| hsa-miR-187-  | NM_0012862 | RALGPS2 | 1          |
| hsa-miR-204-  | NM_0012862 | RALGPS2 | 1          |
| hsa-miR-204-  | NM_0012862 | RALGPS2 | 1          |
| hsa-miR-210-  | NM_0012862 | RALGPS2 | 1          |
| hsa-miR-210-  | NM_0012862 | RALGPS2 | 1          |
| hsa-miR-212-  | NM_0012862 | RALGPS2 | 1          |
| hsa-miR-212-  | NM_0012862 | RALGPS2 | 1          |
| hsa-miR-214-  | NM_0012862 | RALGPS2 | 1          |
| hsa-miR-216a  | NM_0012862 | RALGPS2 | 1          |
| hsa-miR-219a  | NM_0012862 | RALGPS2 | 1          |
| hsa-miR-221-  | NM_0012862 | RALGPS2 | 1          |
| hsa-miR-224-  | NM_0012862 | RALGPS2 | 1          |
| hsa-miR-200b  | NM_0012862 | RALGPS2 | 1          |
| hsa-let-7g-5p | NM_0012862 | RALGPS2 | 1          |
| hsa-miR-15b-  | NM_0012862 | RALGPS2 | 1          |
| hsa-miR-23b-  | NM_0012862 | RALGPS2 | 1          |
| hsa-miR-23b-  | NM_0012862 | RALGPS2 | 1          |
| hsa-miR-23b-  | NM_0012862 | RALGPS2 | 1          |
| hsa-miR-30b-  | NM_0012862 | RALGPS2 | 1          |
| hsa-miR-125t  | NM_0012862 | RALGPS2 | 1          |
| hsa-miR-128-  | NM_0012862 | RALGPS2 | 1          |
| hsa-miR-130a  | NM_0012862 | RALGPS2 | 1          |
| hsa-miR-133a  | NM_0012862 | RALGPS2 | 1          |





















|                         |         |   |
|-------------------------|---------|---|
| hsa-miR-25-5j NM_152663 | RALGPS2 | 1 |
| hsa-miR-26b-1 NM_152663 | RALGPS2 | 1 |
| hsa-miR-28-5j NM_152663 | RALGPS2 | 1 |
| hsa-miR-30a-1 NM_152663 | RALGPS2 | 1 |
| hsa-miR-31-5j NM_152663 | RALGPS2 | 1 |
| hsa-miR-32-5j NM_152663 | RALGPS2 | 1 |
| hsa-miR-33a-1 NM_152663 | RALGPS2 | 1 |
| hsa-miR-33a-2 NM_152663 | RALGPS2 | 1 |
| hsa-miR-92a-1 NM_152663 | RALGPS2 | 1 |
| hsa-miR-98-5j NM_152663 | RALGPS2 | 1 |
| hsa-miR-99a-1 NM_152663 | RALGPS2 | 1 |
| hsa-miR-29b-1 NM_152663 | RALGPS2 | 1 |
| hsa-miR-103a NM_152663  | RALGPS2 | 1 |
| hsa-miR-103a NM_152663  | RALGPS2 | 1 |
| hsa-miR-103a NM_152663  | RALGPS2 | 1 |
| hsa-miR-192-1 NM_152663 | RALGPS2 | 1 |
| hsa-miR-197-1 NM_152663 | RALGPS2 | 1 |
| hsa-miR-198 NM_152663   | RALGPS2 | 1 |
| hsa-miR-129-1 NM_152663 | RALGPS2 | 1 |
| hsa-miR-129-2 NM_152663 | RALGPS2 | 1 |
| hsa-miR-30c-1 NM_152663 | RALGPS2 | 1 |
| hsa-miR-30c-2 NM_152663 | RALGPS2 | 1 |
| hsa-miR-7-2-3 NM_152663 | RALGPS2 | 1 |
| hsa-miR-10a-1 NM_152663 | RALGPS2 | 1 |
| hsa-miR-181b NM_152663  | RALGPS2 | 1 |
| hsa-miR-182-1 NM_152663 | RALGPS2 | 1 |
| hsa-miR-183-1 NM_152663 | RALGPS2 | 1 |
| hsa-miR-210-1 NM_152663 | RALGPS2 | 1 |
| hsa-miR-210-2 NM_152663 | RALGPS2 | 1 |
| hsa-miR-212-1 NM_152663 | RALGPS2 | 1 |
| hsa-miR-214-1 NM_152663 | RALGPS2 | 1 |
| hsa-miR-216a NM_152663  | RALGPS2 | 1 |
| hsa-miR-216a NM_152663  | RALGPS2 | 1 |
| hsa-miR-219a NM_152663  | RALGPS2 | 1 |
| hsa-miR-221-1 NM_152663 | RALGPS2 | 1 |
| hsa-miR-224-1 NM_152663 | RALGPS2 | 1 |
| hsa-miR-200b NM_152663  | RALGPS2 | 1 |
| hsa-miR-15b-1 NM_152663 | RALGPS2 | 1 |
| hsa-miR-23b-1 NM_152663 | RALGPS2 | 1 |
| hsa-miR-23b-2 NM_152663 | RALGPS2 | 1 |
| hsa-miR-125b NM_152663  | RALGPS2 | 1 |
| hsa-miR-125b NM_152663  | RALGPS2 | 1 |
| hsa-miR-128-1 NM_152663 | RALGPS2 | 1 |
| hsa-miR-130a NM_152663  | RALGPS2 | 1 |
| hsa-miR-130a NM_152663  | RALGPS2 | 1 |
| hsa-miR-133a NM_152663  | RALGPS2 | 1 |
| hsa-miR-135a NM_152663  | RALGPS2 | 1 |
| hsa-miR-138-1 NM_152663 | RALGPS2 | 1 |
| hsa-miR-140-1 NM_152663 | RALGPS2 | 1 |
| hsa-miR-141-1 NM_152663 | RALGPS2 | 1 |
| hsa-miR-143-1 NM_152663 | RALGPS2 | 1 |
| hsa-miR-144-1 NM_152663 | RALGPS2 | 1 |
| hsa-miR-145-1 NM_152663 | RALGPS2 | 1 |
| hsa-miR-127-1 NM_152663 | RALGPS2 | 1 |
| hsa-miR-129-2 NM_152663 | RALGPS2 | 1 |
| hsa-miR-150-1 NM_152663 | RALGPS2 | 1 |
| hsa-miR-150-2 NM_152663 | RALGPS2 | 1 |
| hsa-miR-186-1 NM_152663 | RALGPS2 | 1 |
| hsa-miR-188-1 NM_152663 | RALGPS2 | 1 |
| hsa-miR-193a NM_152663  | RALGPS2 | 1 |
| hsa-miR-320a NM_152663  | RALGPS2 | 1 |
| hsa-miR-320a NM_152663  | RALGPS2 | 1 |
| hsa-miR-29c-1 NM_152663 | RALGPS2 | 1 |
| hsa-miR-30c-1 NM_152663 | RALGPS2 | 1 |
| hsa-miR-30c-2 NM_152663 | RALGPS2 | 1 |
| hsa-miR-30c-3 NM_152663 | RALGPS2 | 1 |
| hsa-miR-200a NM_152663  | RALGPS2 | 1 |
| hsa-miR-301a NM_152663  | RALGPS2 | 1 |
| hsa-miR-296-1 NM_152663 | RALGPS2 | 1 |
| hsa-miR-296-2 NM_152663 | RALGPS2 | 1 |
| hsa-miR-130b NM_152663  | RALGPS2 | 1 |
| hsa-miR-130b NM_152663  | RALGPS2 | 1 |
| hsa-miR-30e-1 NM_152663 | RALGPS2 | 1 |
| hsa-miR-362-1 NM_152663 | RALGPS2 | 1 |
| hsa-miR-365a NM_152663  | RALGPS2 | 1 |
| hsa-miR-302c NM_152663  | RALGPS2 | 1 |
| hsa-miR-378a NM_152663  | RALGPS2 | 1 |
| hsa-miR-378a NM_152663  | RALGPS2 | 1 |
| hsa-miR-379-1 NM_152663 | RALGPS2 | 1 |
| hsa-miR-380-1 NM_152663 | RALGPS2 | 1 |
| hsa-miR-382-1 NM_152663 | RALGPS2 | 1 |
| hsa-miR-382-2 NM_152663 | RALGPS2 | 1 |
| hsa-miR-383-1 NM_152663 | RALGPS2 | 1 |
| hsa-miR-383-2 NM_152663 | RALGPS2 | 1 |
| hsa-miR-330-1 NM_152663 | RALGPS2 | 1 |
| hsa-miR-330-2 NM_152663 | RALGPS2 | 1 |
| hsa-miR-328-1 NM_152663 | RALGPS2 | 1 |
| hsa-miR-328-2 NM_152663 | RALGPS2 | 1 |
| hsa-miR-326 NM_152663   | RALGPS2 | 1 |
| hsa-miR-151a NM_152663  | RALGPS2 | 1 |
| hsa-miR-151a NM_152663  | RALGPS2 | 1 |
| hsa-miR-151a NM_152663  | RALGPS2 | 1 |
| hsa-miR-135b NM_152663  | RALGPS2 | 1 |
| hsa-miR-331-1 NM_152663 | RALGPS2 | 1 |

|                        |         |   |
|------------------------|---------|---|
| hsa-miR-331-NM_152663  | RALGPS2 | 1 |
| hsa-miR-331-NM_152663  | RALGPS2 | 1 |
| hsa-miR-339-NM_152663  | RALGPS2 | 1 |
| hsa-miR-196t NM_152663 | RALGPS2 | 1 |
| hsa-miR-422a NM_152663 | RALGPS2 | 1 |
| hsa-miR-423-NM_152663  | RALGPS2 | 1 |
| hsa-miR-424-NM_152663  | RALGPS2 | 1 |
| hsa-miR-18b-NM_152663  | RALGPS2 | 1 |
| hsa-miR-18b-NM_152663  | RALGPS2 | 1 |
| hsa-miR-18b-NM_152663  | RALGPS2 | 1 |
| hsa-miR-429 NM_152663  | RALGPS2 | 1 |
| hsa-miR-329-NM_152663  | RALGPS2 | 1 |
| hsa-miR-329-NM_152663  | RALGPS2 | 1 |
| hsa-miR-452-NM_152663  | RALGPS2 | 1 |
| hsa-miR-409-NM_152663  | RALGPS2 | 1 |
| hsa-miR-412-NM_152663  | RALGPS2 | 1 |
| hsa-miR-412-NM_152663  | RALGPS2 | 1 |
| hsa-miR-483-NM_152663  | RALGPS2 | 1 |
| hsa-miR-484 NM_152663  | RALGPS2 | 1 |
| hsa-miR-487a NM_152663 | RALGPS2 | 1 |
| hsa-miR-487a NM_152663 | RALGPS2 | 1 |
| hsa-miR-146t NM_152663 | RALGPS2 | 1 |
| hsa-miR-193t NM_152663 | RALGPS2 | 1 |
| hsa-miR-497-NM_152663  | RALGPS2 | 1 |
| hsa-miR-497-NM_152663  | RALGPS2 | 1 |
| hsa-miR-181d NM_152663 | RALGPS2 | 1 |
| hsa-miR-498-NM_152663  | RALGPS2 | 1 |
| hsa-miR-520e NM_152663 | RALGPS2 | 1 |
| hsa-miR-520f NM_152663 | RALGPS2 | 1 |
| hsa-miR-519c NM_152663 | RALGPS2 | 1 |
| hsa-miR-520a NM_152663 | RALGPS2 | 1 |
| hsa-miR-526t NM_152663 | RALGPS2 | 1 |
| hsa-miR-519t NM_152663 | RALGPS2 | 1 |
| hsa-miR-523-NM_152663  | RALGPS2 | 1 |
| hsa-miR-518f NM_152663 | RALGPS2 | 1 |
| hsa-miR-518f NM_152663 | RALGPS2 | 1 |
| hsa-miR-518f NM_152663 | RALGPS2 | 1 |
| hsa-miR-520t NM_152663 | RALGPS2 | 1 |
| hsa-miR-518t NM_152663 | RALGPS2 | 1 |
| hsa-miR-526a NM_152663 | RALGPS2 | 1 |
| hsa-miR-526a NM_152663 | RALGPS2 | 1 |
| hsa-miR-520c NM_152663 | RALGPS2 | 1 |
| hsa-miR-520c NM_152663 | RALGPS2 | 1 |
| hsa-miR-520c NM_152663 | RALGPS2 | 1 |
| hsa-miR-518c NM_152663 | RALGPS2 | 1 |
| hsa-miR-518c NM_152663 | RALGPS2 | 1 |
| hsa-miR-524-NM_152663  | RALGPS2 | 1 |
| hsa-miR-520g NM_152663 | RALGPS2 | 1 |
| hsa-miR-516t NM_152663 | RALGPS2 | 1 |
| hsa-miR-518e NM_152663 | RALGPS2 | 1 |
| hsa-miR-518d NM_152663 | RALGPS2 | 1 |
| hsa-miR-522-NM_152663  | RALGPS2 | 1 |
| hsa-miR-519a NM_152663 | RALGPS2 | 1 |
| hsa-miR-500a NM_152663 | RALGPS2 | 1 |
| hsa-miR-502-NM_152663  | RALGPS2 | 1 |
| hsa-miR-504-NM_152663  | RALGPS2 | 1 |
| hsa-miR-505-NM_152663  | RALGPS2 | 1 |
| hsa-miR-505-NM_152663  | RALGPS2 | 1 |
| hsa-miR-509-NM_152663  | RALGPS2 | 1 |
| hsa-miR-510-NM_152663  | RALGPS2 | 1 |
| hsa-miR-514a NM_152663 | RALGPS2 | 1 |
| hsa-miR-563 NM_152663  | RALGPS2 | 1 |
| hsa-miR-575 NM_152663  | RALGPS2 | 1 |
| hsa-miR-584-NM_152663  | RALGPS2 | 1 |
| hsa-miR-584-NM_152663  | RALGPS2 | 1 |
| hsa-miR-585-NM_152663  | RALGPS2 | 1 |
| hsa-miR-588 NM_152663  | RALGPS2 | 1 |
| hsa-miR-550a NM_152663 | RALGPS2 | 1 |
| hsa-miR-600 NM_152663  | RALGPS2 | 1 |
| hsa-miR-605-NM_152663  | RALGPS2 | 1 |
| hsa-miR-612 NM_152663  | RALGPS2 | 1 |
| hsa-miR-614 NM_152663  | RALGPS2 | 1 |
| hsa-miR-615-NM_152663  | RALGPS2 | 1 |
| hsa-miR-615-NM_152663  | RALGPS2 | 1 |
| hsa-miR-623 NM_152663  | RALGPS2 | 1 |
| hsa-miR-628-NM_152663  | RALGPS2 | 1 |
| hsa-miR-629-NM_152663  | RALGPS2 | 1 |
| hsa-miR-631 NM_152663  | RALGPS2 | 1 |
| hsa-miR-632 NM_152663  | RALGPS2 | 1 |
| hsa-miR-637 NM_152663  | RALGPS2 | 1 |
| hsa-miR-642a NM_152663 | RALGPS2 | 1 |
| hsa-miR-647 NM_152663  | RALGPS2 | 1 |
| hsa-miR-663a NM_152663 | RALGPS2 | 1 |
| hsa-miR-654-NM_152663  | RALGPS2 | 1 |
| hsa-miR-657 NM_152663  | RALGPS2 | 1 |
| hsa-miR-657 NM_152663  | RALGPS2 | 1 |
| hsa-miR-659-NM_152663  | RALGPS2 | 1 |
| hsa-miR-671-NM_152663  | RALGPS2 | 1 |
| hsa-miR-671-NM_152663  | RALGPS2 | 1 |

|                         |         |   |
|-------------------------|---------|---|
| hsa-miR-1468 NM_152663  | RALGPS2 | 1 |
| hsa-miR-1185 NM_152663  | RALGPS2 | 1 |
| hsa-miR-449c NM_152663  | RALGPS2 | 1 |
| hsa-miR-449c NM_152663  | RALGPS2 | 1 |
| hsa-miR-769-1 NM_152663 | RALGPS2 | 1 |
| hsa-miR-766-1 NM_152663 | RALGPS2 | 1 |
| hsa-miR-766-1 NM_152663 | RALGPS2 | 1 |
| hsa-miR-1185 NM_152663  | RALGPS2 | 1 |
| hsa-miR-761 NM_152663   | RALGPS2 | 1 |
| hsa-miR-764 NM_152663   | RALGPS2 | 1 |
| hsa-miR-675-1 NM_152663 | RALGPS2 | 1 |
| hsa-miR-675-1 NM_152663 | RALGPS2 | 1 |
| hsa-miR-891a NM_152663  | RALGPS2 | 1 |
| hsa-miR-874-1 NM_152663 | RALGPS2 | 1 |
| hsa-miR-892b NM_152663  | RALGPS2 | 1 |
| hsa-miR-876-1 NM_152663 | RALGPS2 | 1 |
| hsa-miR-708-1 NM_152663 | RALGPS2 | 1 |
| hsa-miR-877-1 NM_152663 | RALGPS2 | 1 |
| hsa-miR-877-1 NM_152663 | RALGPS2 | 1 |
| hsa-miR-877-1 NM_152663 | RALGPS2 | 1 |
| hsa-miR-887-1 NM_152663 | RALGPS2 | 1 |
| hsa-miR-873-1 NM_152663 | RALGPS2 | 1 |
| hsa-miR-301b NM_152663  | RALGPS2 | 1 |
| hsa-miR-934 NM_152663   | RALGPS2 | 1 |
| hsa-miR-935 NM_152663   | RALGPS2 | 1 |
| hsa-miR-936 NM_152663   | RALGPS2 | 1 |
| hsa-miR-936 NM_152663   | RALGPS2 | 1 |
| hsa-miR-937-1 NM_152663 | RALGPS2 | 1 |
| hsa-miR-937-1 NM_152663 | RALGPS2 | 1 |
| hsa-miR-937-1 NM_152663 | RALGPS2 | 1 |
| hsa-miR-937-1 NM_152663 | RALGPS2 | 1 |
| hsa-miR-939-1 NM_152663 | RALGPS2 | 1 |
| hsa-miR-939-1 NM_152663 | RALGPS2 | 1 |
| hsa-miR-939-1 NM_152663 | RALGPS2 | 1 |
| hsa-miR-940 NM_152663   | RALGPS2 | 1 |
| hsa-miR-942-1 NM_152663 | RALGPS2 | 1 |
| hsa-miR-942-1 NM_152663 | RALGPS2 | 1 |
| hsa-miR-1180 NM_152663  | RALGPS2 | 1 |
| hsa-miR-1184 NM_152663  | RALGPS2 | 1 |
| hsa-miR-1225 NM_152663  | RALGPS2 | 1 |
| hsa-miR-1226 NM_152663  | RALGPS2 | 1 |
| hsa-miR-1227 NM_152663  | RALGPS2 | 1 |
| hsa-miR-1228 NM_152663  | RALGPS2 | 1 |
| hsa-miR-1229 NM_152663  | RALGPS2 | 1 |
| hsa-miR-1233 NM_152663  | RALGPS2 | 1 |
| hsa-miR-1233 NM_152663  | RALGPS2 | 1 |
| hsa-miR-1234 NM_152663  | RALGPS2 | 1 |
| hsa-miR-1236 NM_152663  | RALGPS2 | 1 |
| hsa-miR-1237 NM_152663  | RALGPS2 | 1 |
| hsa-miR-1237 NM_152663  | RALGPS2 | 1 |
| hsa-miR-1238 NM_152663  | RALGPS2 | 1 |
| hsa-miR-1205 NM_152663  | RALGPS2 | 1 |
| hsa-miR-1287 NM_152663  | RALGPS2 | 1 |
| hsa-miR-1304 NM_152663  | RALGPS2 | 1 |
| hsa-miR-1245 NM_152663  | RALGPS2 | 1 |
| hsa-miR-1245 NM_152663  | RALGPS2 | 1 |
| hsa-miR-1250 NM_152663  | RALGPS2 | 1 |
| hsa-miR-1250 NM_152663  | RALGPS2 | 1 |
| hsa-miR-1251 NM_152663  | RALGPS2 | 1 |
| hsa-miR-1256 NM_152663  | RALGPS2 | 1 |
| hsa-miR-1257 NM_152663  | RALGPS2 | 1 |
| hsa-miR-1257 NM_152663  | RALGPS2 | 1 |
| hsa-miR-1265 NM_152663  | RALGPS2 | 1 |
| hsa-miR-1284 NM_152663  | RALGPS2 | 1 |
| hsa-miR-1288 NM_152663  | RALGPS2 | 1 |
| hsa-miR-1292 NM_152663  | RALGPS2 | 1 |
| hsa-miR-1255 NM_152663  | RALGPS2 | 1 |
| hsa-miR-664a NM_152663  | RALGPS2 | 1 |
| hsa-miR-513c NM_152663  | RALGPS2 | 1 |
| hsa-miR-1197 NM_152663  | RALGPS2 | 1 |
| hsa-miR-1465 NM_152663  | RALGPS2 | 1 |
| hsa-miR-1825 NM_152663  | RALGPS2 | 1 |
| hsa-miR-1911 NM_152663  | RALGPS2 | 1 |
| hsa-miR-1914 NM_152663  | RALGPS2 | 1 |
| hsa-miR-1915 NM_152663  | RALGPS2 | 1 |
| hsa-miR-1972 NM_152663  | RALGPS2 | 1 |
| hsa-miR-1972 NM_152663  | RALGPS2 | 1 |
| hsa-miR-1976 NM_152663  | RALGPS2 | 1 |
| hsa-miR-1976 NM_152663  | RALGPS2 | 1 |
| hsa-miR-2053 NM_152663  | RALGPS2 | 1 |
| hsa-miR-2117 NM_152663  | RALGPS2 | 1 |
| hsa-miR-2276 NM_152663  | RALGPS2 | 1 |
| hsa-miR-2276 NM_152663  | RALGPS2 | 1 |
| hsa-miR-2681 NM_152663  | RALGPS2 | 1 |
| hsa-miR-2682 NM_152663  | RALGPS2 | 1 |
| hsa-miR-3120 NM_152663  | RALGPS2 | 1 |
| hsa-miR-3124 NM_152663  | RALGPS2 | 1 |
| hsa-miR-3125 NM_152663  | RALGPS2 | 1 |
| hsa-miR-3126 NM_152663  | RALGPS2 | 1 |
| hsa-miR-3127 NM_152663  | RALGPS2 | 1 |
| hsa-miR-3130 NM_152663  | RALGPS2 | 1 |
| hsa-miR-3130 NM_152663  | RALGPS2 | 1 |
| hsa-miR-3131 NM_152663  | RALGPS2 | 1 |
| hsa-miR-3132 NM_152663  | RALGPS2 | 1 |
| hsa-miR-3136 NM_152663  | RALGPS2 | 1 |
| hsa-miR-544b NM_152663  | RALGPS2 | 1 |













|                          |         |            |
|--------------------------|---------|------------|
| hsa-miR-8077 NM_152663   | RALGPS2 | 1          |
| hsa-miR-8087 NM_152663   | RALGPS2 | 1          |
| hsa-miR-9898 NM_152663   | RALGPS2 | 1          |
| hsa-miR-9902 NM_152663   | RALGPS2 | 1          |
| hsa-miR-9903 NM_152663   | RALGPS2 | 1          |
| hsa-miR-9986 NM_152663   | RALGPS2 | 1          |
| hsa-miR-1022 NM_152663   | RALGPS2 | 1          |
| hsa-miR-1039 NM_152663   | RALGPS2 | 1          |
| hsa-miR-1039 NM_152663   | RALGPS2 | 1          |
| hsa-miR-1039 NM_152663   | RALGPS2 | 1          |
| hsa-miR-1040 NM_152663   | RALGPS2 | 1          |
| hsa-miR-1040 NM_152663   | RALGPS2 | 1          |
| hsa-miR-1040 NM_152663   | RALGPS2 | 1          |
| hsa-miR-1140 NM_152663   | RALGPS2 | 1          |
| hsa-miR-3059 NM_152663   | RALGPS2 | 1          |
| hsa-miR-6529 NM_152663   | RALGPS2 | 1          |
| hsa-miR-6529 NM_152663   | RALGPS2 | 1          |
| hsa-miR-9851 NM_152663   | RALGPS2 | 1          |
| hsa-miR-1211 NM_152663   | RALGPS2 | 1          |
| hsa-miR-1212 NM_152663   | RALGPS2 | 1          |
| hsa-miR-217-; NM_0013031 | COL4A1  | 0.95384615 |
| hsa-miR-6719 NM_0013031  | COL4A1  | 0.95384615 |
| hsa-miR-17-3j NM_0013031 | COL4A1  | 0.96153846 |
| hsa-miR-28-3j NM_0013031 | COL4A1  | 0.96153846 |
| hsa-miR-194-; NM_0013031 | COL4A1  | 0.96153846 |
| hsa-miR-584-; NM_0013031 | COL4A1  | 0.96153846 |
| hsa-miR-6882 NM_0013031  | COL4A1  | 0.96153846 |
| hsa-miR-548g NM_001845   | COL4A1  | 0.96153846 |
| hsa-miR-548x NM_001845   | COL4A1  | 0.96153846 |
| hsa-miR-548a NM_001845   | COL4A1  | 0.96153846 |
| hsa-miR-8058 NM_001845   | COL4A1  | 0.96153846 |
| hsa-miR-1321 NM_0013031  | COL4A1  | 0.96923077 |
| hsa-miR-6088 NM_0013031  | COL4A1  | 0.97435897 |
| hsa-miR-548v NM_0013031  | COL4A1  | 0.98076923 |
| hsa-miR-3074 NM_0013031  | COL4A1  | 0.98076923 |
| hsa-let-7a-5p NM_0013031 | COL4A1  | 1          |
| hsa-let-7e-5p NM_0013031 | COL4A1  | 1          |
| hsa-miR-24-3j NM_0013031 | COL4A1  | 1          |
| hsa-miR-24-3j NM_0013031 | COL4A1  | 1          |
| hsa-miR-98-5j NM_0013031 | COL4A1  | 1          |
| hsa-miR-107 NM_0013031   | COL4A1  | 1          |
| hsa-miR-219a NM_0013031  | COL4A1  | 1          |
| hsa-miR-222-; NM_0013031 | COL4A1  | 1          |
| hsa-miR-143-; NM_0013031 | COL4A1  | 1          |
| hsa-miR-125a NM_0013031  | COL4A1  | 1          |
| hsa-miR-146a NM_0013031  | COL4A1  | 1          |
| hsa-miR-146a NM_0013031  | COL4A1  | 1          |
| hsa-miR-375-; NM_0013031 | COL4A1  | 1          |
| hsa-miR-151a NM_0013031  | COL4A1  | 1          |
| hsa-miR-324-; NM_0013031 | COL4A1  | 1          |
| hsa-miR-423-; NM_0013031 | COL4A1  | 1          |
| hsa-miR-20b-; NM_0013031 | COL4A1  | 1          |
| hsa-miR-431-; NM_0013031 | COL4A1  | 1          |
| hsa-miR-483-; NM_0013031 | COL4A1  | 1          |
| hsa-miR-483-; NM_0013031 | COL4A1  | 1          |
| hsa-miR-487a NM_0013031  | COL4A1  | 1          |
| hsa-miR-495-; NM_0013031 | COL4A1  | 1          |
| hsa-miR-520b NM_0013031  | COL4A1  | 1          |
| hsa-miR-520b NM_0013031  | COL4A1  | 1          |
| hsa-miR-520g NM_0013031  | COL4A1  | 1          |
| hsa-miR-519a NM_0013031  | COL4A1  | 1          |
| hsa-miR-501-; NM_0013031 | COL4A1  | 1          |
| hsa-miR-509-; NM_0013031 | COL4A1  | 1          |
| hsa-miR-510-; NM_0013031 | COL4A1  | 1          |
| hsa-miR-487b NM_0013031  | COL4A1  | 1          |
| hsa-miR-554 NM_0013031   | COL4A1  | 1          |
| hsa-miR-554 NM_0013031   | COL4A1  | 1          |
| hsa-miR-550a NM_0013031  | COL4A1  | 1          |
| hsa-miR-630 NM_0013031   | COL4A1  | 1          |
| hsa-miR-652-; NM_0013031 | COL4A1  | 1          |
| hsa-miR-891b NM_0013031  | COL4A1  | 1          |
| hsa-miR-541-; NM_0013031 | COL4A1  | 1          |
| hsa-miR-1291 NM_0013031  | COL4A1  | 1          |
| hsa-miR-1296 NM_0013031  | COL4A1  | 1          |
| hsa-miR-1247 NM_0013031  | COL4A1  | 1          |
| hsa-miR-1251 NM_0013031  | COL4A1  | 1          |
| hsa-miR-1255 NM_0013031  | COL4A1  | 1          |
| hsa-miR-1270 NM_0013031  | COL4A1  | 1          |
| hsa-miR-3153 NM_0013031  | COL4A1  | 1          |
| hsa-miR-3194 NM_0013031  | COL4A1  | 1          |
| hsa-miR-4294 NM_0013031  | COL4A1  | 1          |
| hsa-miR-4306 NM_0013031  | COL4A1  | 1          |
| hsa-miR-4267 NM_0013031  | COL4A1  | 1          |
| hsa-miR-4289 NM_0013031  | COL4A1  | 1          |
| hsa-miR-500b NM_0013031  | COL4A1  | 1          |
| hsa-miR-3615 NM_0013031  | COL4A1  | 1          |
| hsa-miR-3943 NM_0013031  | COL4A1  | 1          |
| hsa-miR-3945 NM_0013031  | COL4A1  | 1          |

|                |            |        |   |
|----------------|------------|--------|---|
| hsa-miR-4421   | NM_0013031 | COL4A1 | 1 |
| hsa-miR-4442   | NM_0013031 | COL4A1 | 1 |
| hsa-miR-4451   | NM_0013031 | COL4A1 | 1 |
| hsa-miR-4484   | NM_0013031 | COL4A1 | 1 |
| hsa-miR-4496   | NM_0013031 | COL4A1 | 1 |
| hsa-miR-4510   | NM_0013031 | COL4A1 | 1 |
| hsa-miR-4518   | NM_0013031 | COL4A1 | 1 |
| hsa-miR-4526   | NM_0013031 | COL4A1 | 1 |
| hsa-miR-4646   | NM_0013031 | COL4A1 | 1 |
| hsa-miR-4667   | NM_0013031 | COL4A1 | 1 |
| hsa-miR-4685   | NM_0013031 | COL4A1 | 1 |
| hsa-miR-4705   | NM_0013031 | COL4A1 | 1 |
| hsa-miR-4723   | NM_0013031 | COL4A1 | 1 |
| hsa-miR-4724   | NM_0013031 | COL4A1 | 1 |
| hsa-miR-4727   | NM_0013031 | COL4A1 | 1 |
| hsa-miR-4727   | NM_0013031 | COL4A1 | 1 |
| hsa-miR-4732   | NM_0013031 | COL4A1 | 1 |
| hsa-miR-4732   | NM_0013031 | COL4A1 | 1 |
| hsa-miR-4768   | NM_0013031 | COL4A1 | 1 |
| hsa-miR-4436   | NM_0013031 | COL4A1 | 1 |
| hsa-miR-4781   | NM_0013031 | COL4A1 | 1 |
| hsa-miR-5002   | NM_0013031 | COL4A1 | 1 |
| hsa-miR-5010   | NM_0013031 | COL4A1 | 1 |
| hsa-miR-5187   | NM_0013031 | COL4A1 | 1 |
| hsa-miR-5192   | NM_0013031 | COL4A1 | 1 |
| hsa-miR-4524   | NM_0013031 | COL4A1 | 1 |
| hsa-miR-664b   | NM_0013031 | COL4A1 | 1 |
| hsa-miR-5581   | NM_0013031 | COL4A1 | 1 |
| hsa-miR-5591   | NM_0013031 | COL4A1 | 1 |
| hsa-miR-5694   | NM_0013031 | COL4A1 | 1 |
| hsa-miR-5739   | NM_0013031 | COL4A1 | 1 |
| hsa-miR-6165   | NM_0013031 | COL4A1 | 1 |
| hsa-miR-6507   | NM_0013031 | COL4A1 | 1 |
| hsa-miR-6510   | NM_0013031 | COL4A1 | 1 |
| hsa-miR-6715   | NM_0013031 | COL4A1 | 1 |
| hsa-miR-6716   | NM_0013031 | COL4A1 | 1 |
| hsa-miR-6750   | NM_0013031 | COL4A1 | 1 |
| hsa-miR-6758   | NM_0013031 | COL4A1 | 1 |
| hsa-miR-6788   | NM_0013031 | COL4A1 | 1 |
| hsa-miR-6801   | NM_0013031 | COL4A1 | 1 |
| hsa-miR-6805   | NM_0013031 | COL4A1 | 1 |
| hsa-miR-6818   | NM_0013031 | COL4A1 | 1 |
| hsa-miR-6837   | NM_0013031 | COL4A1 | 1 |
| hsa-miR-6840   | NM_0013031 | COL4A1 | 1 |
| hsa-miR-6853   | NM_0013031 | COL4A1 | 1 |
| hsa-miR-6856   | NM_0013031 | COL4A1 | 1 |
| hsa-miR-6855   | NM_0013031 | COL4A1 | 1 |
| hsa-miR-6864   | NM_0013031 | COL4A1 | 1 |
| hsa-miR-6875   | NM_0013031 | COL4A1 | 1 |
| hsa-miR-6882   | NM_0013031 | COL4A1 | 1 |
| hsa-miR-6884   | NM_0013031 | COL4A1 | 1 |
| hsa-miR-6888   | NM_0013031 | COL4A1 | 1 |
| hsa-miR-6891   | NM_0013031 | COL4A1 | 1 |
| hsa-miR-6893   | NM_0013031 | COL4A1 | 1 |
| hsa-miR-6895   | NM_0013031 | COL4A1 | 1 |
| hsa-miR-7107   | NM_0013031 | COL4A1 | 1 |
| hsa-miR-7157   | NM_0013031 | COL4A1 | 1 |
| hsa-miR-1273   | NM_0013031 | COL4A1 | 1 |
| hsa-miR-7846   | NM_0013031 | COL4A1 | 1 |
| hsa-miR-1022   | NM_0013031 | COL4A1 | 1 |
| hsa-miR-6529   | NM_0013031 | COL4A1 | 1 |
| hsa-let-7a-2-3 | NM_001845  | COL4A1 | 1 |
| hsa-let-7d-5p  | NM_001845  | COL4A1 | 1 |
| hsa-let-7e-3p  | NM_001845  | COL4A1 | 1 |
| hsa-miR-15a-   | NM_001845  | COL4A1 | 1 |
| hsa-miR-16-5j  | NM_001845  | COL4A1 | 1 |
| hsa-miR-18a-   | NM_001845  | COL4A1 | 1 |
| hsa-miR-24-1-  | NM_001845  | COL4A1 | 1 |
| hsa-miR-33a-   | NM_001845  | COL4A1 | 1 |
| hsa-miR-196a   | NM_001845  | COL4A1 | 1 |
| hsa-miR-197-   | NM_001845  | COL4A1 | 1 |
| hsa-miR-129-   | NM_001845  | COL4A1 | 1 |
| hsa-miR-181b   | NM_001845  | COL4A1 | 1 |
| hsa-miR-215-   | NM_001845  | COL4A1 | 1 |
| hsa-miR-223-   | NM_001845  | COL4A1 | 1 |
| hsa-let-7i-5p  | NM_001845  | COL4A1 | 1 |
| hsa-miR-137-   | NM_001845  | COL4A1 | 1 |
| hsa-miR-191-   | NM_001845  | COL4A1 | 1 |
| hsa-miR-379-   | NM_001845  | COL4A1 | 1 |
| hsa-miR-495-   | NM_001845  | COL4A1 | 1 |
| hsa-miR-556-   | NM_001845  | COL4A1 | 1 |
| hsa-miR-562    | NM_001845  | COL4A1 | 1 |
| hsa-miR-574-   | NM_001845  | COL4A1 | 1 |
| hsa-miR-593-   | NM_001845  | COL4A1 | 1 |
| hsa-miR-595    | NM_001845  | COL4A1 | 1 |
| hsa-miR-622    | NM_001845  | COL4A1 | 1 |
| hsa-miR-33b-   | NM_001845  | COL4A1 | 1 |
| hsa-miR-632    | NM_001845  | COL4A1 | 1 |
| hsa-miR-639    | NM_001845  | COL4A1 | 1 |
| hsa-miR-660-   | NM_001845  | COL4A1 | 1 |
| hsa-miR-1271   | NM_001845  | COL4A1 | 1 |
| hsa-miR-450b   | NM_001845  | COL4A1 | 1 |
| hsa-miR-877-   | NM_001845  | COL4A1 | 1 |
| hsa-miR-924    | NM_001845  | COL4A1 | 1 |
| hsa-miR-942-   | NM_001845  | COL4A1 | 1 |

|                        |        |            |
|------------------------|--------|------------|
| hsa-miR-1228 NM_001845 | COL4A1 | 1          |
| hsa-miR-1203 NM_001845 | COL4A1 | 1          |
| hsa-miR-1287 NM_001845 | COL4A1 | 1          |
| hsa-miR-1291 NM_001845 | COL4A1 | 1          |
| hsa-miR-1304 NM_001845 | COL4A1 | 1          |
| hsa-miR-1270 NM_001845 | COL4A1 | 1          |
| hsa-miR-1322 NM_001845 | COL4A1 | 1          |
| hsa-miR-1910 NM_001845 | COL4A1 | 1          |
| hsa-miR-1976 NM_001845 | COL4A1 | 1          |
| hsa-miR-3138 NM_001845 | COL4A1 | 1          |
| hsa-miR-3147 NM_001845 | COL4A1 | 1          |
| hsa-miR-3174 NM_001845 | COL4A1 | 1          |
| hsa-miR-4297 NM_001845 | COL4A1 | 1          |
| hsa-miR-4323 NM_001845 | COL4A1 | 1          |
| hsa-miR-4265 NM_001845 | COL4A1 | 1          |
| hsa-miR-3620 NM_001845 | COL4A1 | 1          |
| hsa-miR-3678 NM_001845 | COL4A1 | 1          |
| hsa-miR-3683 NM_001845 | COL4A1 | 1          |
| hsa-miR-3692 NM_001845 | COL4A1 | 1          |
| hsa-miR-4444 NM_001845 | COL4A1 | 1          |
| hsa-miR-548a NM_001845 | COL4A1 | 1          |
| hsa-miR-4455 NM_001845 | COL4A1 | 1          |
| hsa-miR-446C NM_001845 | COL4A1 | 1          |
| hsa-miR-4502 NM_001845 | COL4A1 | 1          |
| hsa-miR-4523 NM_001845 | COL4A1 | 1          |
| hsa-miR-3973 NM_001845 | COL4A1 | 1          |
| hsa-miR-4657 NM_001845 | COL4A1 | 1          |
| hsa-miR-4672 NM_001845 | COL4A1 | 1          |
| hsa-miR-4691 NM_001845 | COL4A1 | 1          |
| hsa-miR-4701 NM_001845 | COL4A1 | 1          |
| hsa-miR-4704 NM_001845 | COL4A1 | 1          |
| hsa-miR-4711 NM_001845 | COL4A1 | 1          |
| hsa-miR-4742 NM_001845 | COL4A1 | 1          |
| hsa-miR-4743 NM_001845 | COL4A1 | 1          |
| hsa-miR-4756 NM_001845 | COL4A1 | 1          |
| hsa-miR-4758 NM_001845 | COL4A1 | 1          |
| hsa-miR-4764 NM_001845 | COL4A1 | 1          |
| hsa-miR-4776 NM_001845 | COL4A1 | 1          |
| hsa-miR-4789 NM_001845 | COL4A1 | 1          |
| hsa-miR-4804 NM_001845 | COL4A1 | 1          |
| hsa-miR-5092 NM_001845 | COL4A1 | 1          |
| hsa-miR-548a NM_001845 | COL4A1 | 1          |
| hsa-miR-558C NM_001845 | COL4A1 | 1          |
| hsa-miR-5589 NM_001845 | COL4A1 | 1          |
| hsa-miR-559C NM_001845 | COL4A1 | 1          |
| hsa-miR-5681 NM_001845 | COL4A1 | 1          |
| hsa-miR-5681 NM_001845 | COL4A1 | 1          |
| hsa-miR-5694 NM_001845 | COL4A1 | 1          |
| hsa-miR-6134 NM_001845 | COL4A1 | 1          |
| hsa-miR-6503 NM_001845 | COL4A1 | 1          |
| hsa-miR-651C NM_001845 | COL4A1 | 1          |
| hsa-miR-674C NM_001845 | COL4A1 | 1          |
| hsa-miR-6747 NM_001845 | COL4A1 | 1          |
| hsa-miR-675C NM_001845 | COL4A1 | 1          |
| hsa-miR-6753 NM_001845 | COL4A1 | 1          |
| hsa-miR-6777 NM_001845 | COL4A1 | 1          |
| hsa-miR-6789 NM_001845 | COL4A1 | 1          |
| hsa-miR-6796 NM_001845 | COL4A1 | 1          |
| hsa-miR-6804 NM_001845 | COL4A1 | 1          |
| hsa-miR-6809 NM_001845 | COL4A1 | 1          |
| hsa-miR-6811 NM_001845 | COL4A1 | 1          |
| hsa-miR-6826 NM_001845 | COL4A1 | 1          |
| hsa-miR-6828 NM_001845 | COL4A1 | 1          |
| hsa-miR-6835 NM_001845 | COL4A1 | 1          |
| hsa-miR-6838 NM_001845 | COL4A1 | 1          |
| hsa-miR-6847 NM_001845 | COL4A1 | 1          |
| hsa-miR-6868 NM_001845 | COL4A1 | 1          |
| hsa-miR-6872 NM_001845 | COL4A1 | 1          |
| hsa-miR-6878 NM_001845 | COL4A1 | 1          |
| hsa-miR-6882 NM_001845 | COL4A1 | 1          |
| hsa-miR-7114 NM_001845 | COL4A1 | 1          |
| hsa-miR-7154 NM_001845 | COL4A1 | 1          |
| hsa-miR-7159 NM_001845 | COL4A1 | 1          |
| hsa-miR-8081 NM_001845 | COL4A1 | 1          |
| hsa-miR-1139 NM_001845 | COL4A1 | 1          |
| hsa-miR-6529 NM_001845 | COL4A1 | 1          |
| hsa-miR-1213 NM_001845 | COL4A1 | 1          |
| hsa-miR-316C NM_021777 | ADAM28 | 0.96153846 |
| hsa-miR-6785 NM_021777 | ADAM28 | 0.96153846 |
| hsa-miR-4433 NM_021777 | ADAM28 | 0.96153846 |
| hsa-miR-140- NM_014265 | ADAM28 | 0.96153846 |
| hsa-miR-532- NM_014265 | ADAM28 | 0.96153846 |
| hsa-miR-1237 NM_014265 | ADAM28 | 0.96153846 |
| hsa-miR-4765 NM_014265 | ADAM28 | 0.96153846 |
| hsa-miR-5011 NM_014265 | ADAM28 | 0.96153846 |
| hsa-miR-6849 NM_014265 | ADAM28 | 0.96153846 |
| hsa-miR-8059 NM_014265 | ADAM28 | 0.96153846 |
| hsa-miR-1039 NM_014265 | ADAM28 | 0.96153846 |
| hsa-miR-1212 NM_014265 | ADAM28 | 0.96153846 |
| hsa-miR-4687 NM_021777 | ADAM28 | 0.97435897 |
| hsa-miR-6875 NM_021777 | ADAM28 | 0.97435897 |
| hsa-miR-140- NM_014265 | ADAM28 | 0.97435897 |
| hsa-miR-4748 NM_014265 | ADAM28 | 0.97435897 |
| hsa-miR-4756 NM_014265 | ADAM28 | 0.97435897 |

|                         |        |            |
|-------------------------|--------|------------|
| hsa-miR-5001 NM_014265  | ADAM28 | 0.97435897 |
| hsa-miR-6827 NM_014265  | ADAM28 | 0.97435897 |
| hsa-miR-6891 NM_014265  | ADAM28 | 0.97435897 |
| hsa-miR-135t NM_021777  | ADAM28 | 0.98076923 |
| hsa-miR-6501 NM_014265  | ADAM28 | 0.98076923 |
| hsa-miR-6852 NM_014265  | ADAM28 | 0.98076923 |
| hsa-miR-574- NM_021777  | ADAM28 | 0.98461539 |
| hsa-miR-4672 NM_021777  | ADAM28 | 0.99145299 |
| hsa-miR-93-3j NM_021777 | ADAM28 | 1          |
| hsa-miR-204- NM_021777  | ADAM28 | 1          |
| hsa-miR-211- NM_021777  | ADAM28 | 1          |
| hsa-miR-133a NM_021777  | ADAM28 | 1          |
| hsa-miR-150- NM_021777  | ADAM28 | 1          |
| hsa-miR-99b- NM_021777  | ADAM28 | 1          |
| hsa-miR-133t NM_021777  | ADAM28 | 1          |
| hsa-miR-431- NM_021777  | ADAM28 | 1          |
| hsa-miR-329- NM_021777  | ADAM28 | 1          |
| hsa-miR-410- NM_021777  | ADAM28 | 1          |
| hsa-miR-486- NM_021777  | ADAM28 | 1          |
| hsa-miR-605- NM_021777  | ADAM28 | 1          |
| hsa-miR-608 NM_021777   | ADAM28 | 1          |
| hsa-miR-874- NM_021777  | ADAM28 | 1          |
| hsa-miR-147t NM_021777  | ADAM28 | 1          |
| hsa-miR-887- NM_021777  | ADAM28 | 1          |
| hsa-miR-216t NM_021777  | ADAM28 | 1          |
| hsa-miR-1181 NM_021777  | ADAM28 | 1          |
| hsa-miR-1229 NM_021777  | ADAM28 | 1          |
| hsa-miR-1238 NM_021777  | ADAM28 | 1          |
| hsa-miR-126C NM_021777  | ADAM28 | 1          |
| hsa-miR-1322 NM_021777  | ADAM28 | 1          |
| hsa-miR-1197 NM_021777  | ADAM28 | 1          |
| hsa-miR-1909 NM_021777  | ADAM28 | 1          |
| hsa-miR-2114 NM_021777  | ADAM28 | 1          |
| hsa-miR-2276 NM_021777  | ADAM28 | 1          |
| hsa-miR-548v NM_021777  | ADAM28 | 1          |
| hsa-miR-3152 NM_021777  | ADAM28 | 1          |
| hsa-miR-317C NM_021777  | ADAM28 | 1          |
| hsa-miR-3187 NM_021777  | ADAM28 | 1          |
| hsa-miR-319C NM_021777  | ADAM28 | 1          |
| hsa-miR-4301 NM_021777  | ADAM28 | 1          |
| hsa-miR-362C NM_021777  | ADAM28 | 1          |
| hsa-miR-3622 NM_021777  | ADAM28 | 1          |
| hsa-miR-3648 NM_021777  | ADAM28 | 1          |
| hsa-miR-3681 NM_021777  | ADAM28 | 1          |
| hsa-miR-4476 NM_021777  | ADAM28 | 1          |
| hsa-miR-4506 NM_021777  | ADAM28 | 1          |
| hsa-miR-4507 NM_021777  | ADAM28 | 1          |
| hsa-miR-451C NM_021777  | ADAM28 | 1          |
| hsa-miR-4525 NM_021777  | ADAM28 | 1          |
| hsa-miR-4647 NM_021777  | ADAM28 | 1          |
| hsa-miR-469C NM_021777  | ADAM28 | 1          |
| hsa-miR-471C NM_021777  | ADAM28 | 1          |
| hsa-miR-4715 NM_021777  | ADAM28 | 1          |
| hsa-miR-4743 NM_021777  | ADAM28 | 1          |
| hsa-miR-4763 NM_021777  | ADAM28 | 1          |
| hsa-miR-4781 NM_021777  | ADAM28 | 1          |
| hsa-miR-4785 NM_021777  | ADAM28 | 1          |
| hsa-miR-4787 NM_021777  | ADAM28 | 1          |
| hsa-miR-5191 NM_021777  | ADAM28 | 1          |
| hsa-miR-5681 NM_021777  | ADAM28 | 1          |
| hsa-miR-5689 NM_021777  | ADAM28 | 1          |
| hsa-miR-5693 NM_021777  | ADAM28 | 1          |
| hsa-miR-6727 NM_021777  | ADAM28 | 1          |
| hsa-miR-6746 NM_021777  | ADAM28 | 1          |
| hsa-miR-6747 NM_021777  | ADAM28 | 1          |
| hsa-miR-6748 NM_021777  | ADAM28 | 1          |
| hsa-miR-6771 NM_021777  | ADAM28 | 1          |
| hsa-miR-6774 NM_021777  | ADAM28 | 1          |
| hsa-miR-6804 NM_021777  | ADAM28 | 1          |
| hsa-miR-6808 NM_021777  | ADAM28 | 1          |
| hsa-miR-6811 NM_021777  | ADAM28 | 1          |
| hsa-miR-6815 NM_021777  | ADAM28 | 1          |
| hsa-miR-682C NM_021777  | ADAM28 | 1          |
| hsa-miR-6769 NM_021777  | ADAM28 | 1          |
| hsa-miR-6869 NM_021777  | ADAM28 | 1          |
| hsa-miR-6881 NM_021777  | ADAM28 | 1          |
| hsa-miR-6882 NM_021777  | ADAM28 | 1          |
| hsa-miR-6884 NM_021777  | ADAM28 | 1          |
| hsa-miR-6887 NM_021777  | ADAM28 | 1          |
| hsa-miR-689C NM_021777  | ADAM28 | 1          |
| hsa-miR-6893 NM_021777  | ADAM28 | 1          |
| hsa-miR-7111 NM_021777  | ADAM28 | 1          |
| hsa-miR-9899 NM_021777  | ADAM28 | 1          |
| hsa-miR-1211 NM_021777  | ADAM28 | 1          |
| hsa-miR-1212 NM_021777  | ADAM28 | 1          |
| hsa-miR-1212 NM_021777  | ADAM28 | 1          |
| hsa-let-7a-5p NM_014265 | ADAM28 | 1          |
| hsa-let-7c-5p NM_014265 | ADAM28 | 1          |
| hsa-miR-23a- NM_014265  | ADAM28 | 1          |
| hsa-miR-29a- NM_014265  | ADAM28 | 1          |
| hsa-miR-103a NM_014265  | ADAM28 | 1          |
| hsa-miR-107 NM_014265   | ADAM28 | 1          |
| hsa-miR-197- NM_014265  | ADAM28 | 1          |
| hsa-miR-129- NM_014265  | ADAM28 | 1          |

|              |           |        |   |
|--------------|-----------|--------|---|
| hsa-miR-139- | NM_014265 | ADAM28 | 1 |
| hsa-miR-183- | NM_014265 | ADAM28 | 1 |
| hsa-miR-210- | NM_014265 | ADAM28 | 1 |
| hsa-miR-216a | NM_014265 | ADAM28 | 1 |
| hsa-miR-217- | NM_014265 | ADAM28 | 1 |
| hsa-miR-217- | NM_014265 | ADAM28 | 1 |
| hsa-miR-222- | NM_014265 | ADAM28 | 1 |
| hsa-miR-200b | NM_014265 | ADAM28 | 1 |
| hsa-miR-15b- | NM_014265 | ADAM28 | 1 |
| hsa-miR-15b- | NM_014265 | ADAM28 | 1 |
| hsa-miR-23b- | NM_014265 | ADAM28 | 1 |
| hsa-miR-137- | NM_014265 | ADAM28 | 1 |
| hsa-miR-138- | NM_014265 | ADAM28 | 1 |
| hsa-miR-145- | NM_014265 | ADAM28 | 1 |
| hsa-miR-125a | NM_014265 | ADAM28 | 1 |
| hsa-miR-127- | NM_014265 | ADAM28 | 1 |
| hsa-miR-127- | NM_014265 | ADAM28 | 1 |
| hsa-miR-134- | NM_014265 | ADAM28 | 1 |
| hsa-miR-149- | NM_014265 | ADAM28 | 1 |
| hsa-miR-150- | NM_014265 | ADAM28 | 1 |
| hsa-miR-320a | NM_014265 | ADAM28 | 1 |
| hsa-miR-106b | NM_014265 | ADAM28 | 1 |
| hsa-miR-99b- | NM_014265 | ADAM28 | 1 |
| hsa-miR-296- | NM_014265 | ADAM28 | 1 |
| hsa-miR-302c | NM_014265 | ADAM28 | 1 |
| hsa-miR-371a | NM_014265 | ADAM28 | 1 |
| hsa-miR-340- | NM_014265 | ADAM28 | 1 |
| hsa-miR-330- | NM_014265 | ADAM28 | 1 |
| hsa-miR-135b | NM_014265 | ADAM28 | 1 |
| hsa-miR-324- | NM_014265 | ADAM28 | 1 |
| hsa-miR-345- | NM_014265 | ADAM28 | 1 |
| hsa-miR-345- | NM_014265 | ADAM28 | 1 |
| hsa-miR-196b | NM_014265 | ADAM28 | 1 |
| hsa-miR-423- | NM_014265 | ADAM28 | 1 |
| hsa-miR-423- | NM_014265 | ADAM28 | 1 |
| hsa-miR-431- | NM_014265 | ADAM28 | 1 |
| hsa-miR-431- | NM_014265 | ADAM28 | 1 |
| hsa-miR-329- | NM_014265 | ADAM28 | 1 |
| hsa-miR-409- | NM_014265 | ADAM28 | 1 |
| hsa-miR-412- | NM_014265 | ADAM28 | 1 |
| hsa-miR-484  | NM_014265 | ADAM28 | 1 |
| hsa-miR-486- | NM_014265 | ADAM28 | 1 |
| hsa-miR-491- | NM_014265 | ADAM28 | 1 |
| hsa-miR-498- | NM_014265 | ADAM28 | 1 |
| hsa-miR-519b | NM_014265 | ADAM28 | 1 |
| hsa-miR-520b | NM_014265 | ADAM28 | 1 |
| hsa-miR-517a | NM_014265 | ADAM28 | 1 |
| hsa-miR-517b | NM_014265 | ADAM28 | 1 |
| hsa-miR-519a | NM_014265 | ADAM28 | 1 |
| hsa-miR-503- | NM_014265 | ADAM28 | 1 |
| hsa-miR-505- | NM_014265 | ADAM28 | 1 |
| hsa-miR-513a | NM_014265 | ADAM28 | 1 |
| hsa-miR-545- | NM_014265 | ADAM28 | 1 |
| hsa-miR-376a | NM_014265 | ADAM28 | 1 |
| hsa-miR-92b- | NM_014265 | ADAM28 | 1 |
| hsa-miR-579- | NM_014265 | ADAM28 | 1 |
| hsa-miR-550a | NM_014265 | ADAM28 | 1 |
| hsa-miR-601  | NM_014265 | ADAM28 | 1 |
| hsa-miR-617  | NM_014265 | ADAM28 | 1 |
| hsa-miR-33b- | NM_014265 | ADAM28 | 1 |
| hsa-miR-639  | NM_014265 | ADAM28 | 1 |
| hsa-miR-647  | NM_014265 | ADAM28 | 1 |
| hsa-miR-652- | NM_014265 | ADAM28 | 1 |
| hsa-miR-659- | NM_014265 | ADAM28 | 1 |
| hsa-miR-758- | NM_014265 | ADAM28 | 1 |
| hsa-miR-671- | NM_014265 | ADAM28 | 1 |
| hsa-miR-320b | NM_014265 | ADAM28 | 1 |
| hsa-miR-320b | NM_014265 | ADAM28 | 1 |
| hsa-miR-320c | NM_014265 | ADAM28 | 1 |
| hsa-miR-1296 | NM_014265 | ADAM28 | 1 |
| hsa-miR-1301 | NM_014265 | ADAM28 | 1 |
| hsa-miR-454- | NM_014265 | ADAM28 | 1 |
| hsa-miR-449c | NM_014265 | ADAM28 | 1 |
| hsa-miR-1298 | NM_014265 | ADAM28 | 1 |
| hsa-miR-764  | NM_014265 | ADAM28 | 1 |
| hsa-miR-675- | NM_014265 | ADAM28 | 1 |
| hsa-miR-541- | NM_014265 | ADAM28 | 1 |
| hsa-miR-889- | NM_014265 | ADAM28 | 1 |
| hsa-miR-875- | NM_014265 | ADAM28 | 1 |
| hsa-miR-708- | NM_014265 | ADAM28 | 1 |
| hsa-miR-873- | NM_014265 | ADAM28 | 1 |
| hsa-miR-760  | NM_014265 | ADAM28 | 1 |
| hsa-miR-301b | NM_014265 | ADAM28 | 1 |
| hsa-miR-301b | NM_014265 | ADAM28 | 1 |
| hsa-miR-216b | NM_014265 | ADAM28 | 1 |
| hsa-miR-920  | NM_014265 | ADAM28 | 1 |
| hsa-miR-509- | NM_014265 | ADAM28 | 1 |
| hsa-miR-936  | NM_014265 | ADAM28 | 1 |
| hsa-miR-937- | NM_014265 | ADAM28 | 1 |
| hsa-miR-937- | NM_014265 | ADAM28 | 1 |
| hsa-miR-942- | NM_014265 | ADAM28 | 1 |
| hsa-miR-297  | NM_014265 | ADAM28 | 1 |
| hsa-miR-118c | NM_014265 | ADAM28 | 1 |
| hsa-miR-1182 | NM_014265 | ADAM28 | 1 |









|                         |         |            |
|-------------------------|---------|------------|
| hsa-miR-7845 NM_014265  | ADAM28  | 1          |
| hsa-miR-7847 NM_014265  | ADAM28  | 1          |
| hsa-miR-7850 NM_014265  | ADAM28  | 1          |
| hsa-miR-7851 NM_014265  | ADAM28  | 1          |
| hsa-miR-7854 NM_014265  | ADAM28  | 1          |
| hsa-miR-7974 NM_014265  | ADAM28  | 1          |
| hsa-miR-8052 NM_014265  | ADAM28  | 1          |
| hsa-miR-8057 NM_014265  | ADAM28  | 1          |
| hsa-miR-8082 NM_014265  | ADAM28  | 1          |
| hsa-miR-8085 NM_014265  | ADAM28  | 1          |
| hsa-miR-8085 NM_014265  | ADAM28  | 1          |
| hsa-miR-8088 NM_014265  | ADAM28  | 1          |
| hsa-miR-8089 NM_014265  | ADAM28  | 1          |
| hsa-miR-9718 NM_014265  | ADAM28  | 1          |
| hsa-miR-9901 NM_014265  | ADAM28  | 1          |
| hsa-miR-1022 NM_014265  | ADAM28  | 1          |
| hsa-miR-1022 NM_014265  | ADAM28  | 1          |
| hsa-miR-104C NM_014265  | ADAM28  | 1          |
| hsa-miR-1052 NM_014265  | ADAM28  | 1          |
| hsa-miR-1139 NM_014265  | ADAM28  | 1          |
| hsa-miR-3085 NM_014265  | ADAM28  | 1          |
| hsa-miR-9851 NM_014265  | ADAM28  | 1          |
| hsa-miR-7106 XM_0244468 | GALNT11 | 0.96153846 |
| hsa-miR-1266 NM_022087  | GALNT11 | 0.96153846 |
| hsa-miR-7106 NM_022087  | GALNT11 | 0.96153846 |
| hsa-miR-224- NM_0013714 | GALNT11 | 0.96153846 |
| hsa-miR-140- NM_0013714 | GALNT11 | 0.96153846 |
| hsa-miR-504- NM_0013714 | GALNT11 | 0.96153846 |
| hsa-miR-1908 NM_0013714 | GALNT11 | 0.96153846 |
| hsa-miR-4667 NM_0013714 | GALNT11 | 0.96153846 |
| hsa-miR-6802 NM_0013714 | GALNT11 | 0.96153846 |
| hsa-miR-224- NM_0013714 | GALNT11 | 0.96153846 |
| hsa-miR-140- NM_0013714 | GALNT11 | 0.96153846 |
| hsa-miR-504- NM_0013714 | GALNT11 | 0.96153846 |
| hsa-miR-1908 NM_0013714 | GALNT11 | 0.96153846 |
| hsa-miR-4756 NM_0013714 | GALNT11 | 0.96153846 |
| hsa-miR-6802 NM_0013714 | GALNT11 | 0.96153846 |
| hsa-miR-7155 NM_0013714 | GALNT11 | 0.96153846 |
| hsa-miR-7706 NM_0013714 | GALNT11 | 0.96153846 |
| hsa-miR-218- XM_0244468 | GALNT11 | 0.97435897 |
| hsa-miR-6774 XM_0244468 | GALNT11 | 0.97435897 |
| hsa-miR-517- NM_0013714 | GALNT11 | 0.97435897 |
| hsa-miR-4536 NM_0013714 | GALNT11 | 0.97435897 |
| hsa-miR-4686 NM_0013714 | GALNT11 | 0.97435897 |
| hsa-miR-517- NM_0013714 | GALNT11 | 0.97435897 |
| hsa-miR-662 NM_0013714  | GALNT11 | 0.97435897 |
| hsa-miR-4536 NM_0013714 | GALNT11 | 0.97435897 |
| hsa-miR-4686 NM_0013714 | GALNT11 | 0.97435897 |
| hsa-miR-6078 NM_0013714 | GALNT11 | 0.97435897 |
| hsa-miR-6165 NM_0013714 | GALNT11 | 0.97435897 |
| hsa-miR-6165 NM_0013714 | GALNT11 | 0.97435897 |
| hsa-miR-1226 XM_0244468 | GALNT11 | 0.98076923 |
| hsa-miR-1251 NM_022087  | GALNT11 | 0.98076923 |
| hsa-miR-6828 NM_022087  | GALNT11 | 0.98076923 |
| hsa-miR-509C NM_0013714 | GALNT11 | 0.98076923 |
| hsa-miR-509C NM_0013714 | GALNT11 | 0.98076923 |
| hsa-miR-18a- XM_0244468 | GALNT11 | 1          |
| hsa-miR-23a- XM_0244468 | GALNT11 | 1          |
| hsa-miR-187- XM_0244468 | GALNT11 | 1          |
| hsa-miR-214- XM_0244468 | GALNT11 | 1          |
| hsa-miR-218- XM_0244468 | GALNT11 | 1          |
| hsa-miR-134- XM_0244468 | GALNT11 | 1          |
| hsa-miR-149- XM_0244468 | GALNT11 | 1          |
| hsa-miR-184 XM_0244468  | GALNT11 | 1          |
| hsa-miR-106t XM_0244468 | GALNT11 | 1          |
| hsa-miR-106t XM_0244468 | GALNT11 | 1          |
| hsa-miR-376c XM_0244468 | GALNT11 | 1          |
| hsa-miR-376t XM_0244468 | GALNT11 | 1          |
| hsa-miR-490- XM_0244468 | GALNT11 | 1          |
| hsa-miR-146t XM_0244468 | GALNT11 | 1          |
| hsa-miR-146t XM_0244468 | GALNT11 | 1          |
| hsa-miR-494- XM_0244468 | GALNT11 | 1          |
| hsa-miR-524- XM_0244468 | GALNT11 | 1          |
| hsa-miR-518c XM_0244468 | GALNT11 | 1          |
| hsa-miR-501- XM_0244468 | GALNT11 | 1          |
| hsa-miR-514a XM_0244468 | GALNT11 | 1          |
| hsa-miR-647 XM_0244468  | GALNT11 | 1          |
| hsa-miR-660- XM_0244468 | GALNT11 | 1          |
| hsa-miR-660- XM_0244468 | GALNT11 | 1          |
| hsa-miR-671- XM_0244468 | GALNT11 | 1          |
| hsa-miR-1301 XM_0244468 | GALNT11 | 1          |
| hsa-miR-1178 XM_0244468 | GALNT11 | 1          |
| hsa-miR-118C XM_0244468 | GALNT11 | 1          |
| hsa-miR-1233 XM_0244468 | GALNT11 | 1          |
| hsa-miR-1237 XM_0244468 | GALNT11 | 1          |
| hsa-miR-1247 XM_0244468 | GALNT11 | 1          |
| hsa-miR-1251 XM_0244468 | GALNT11 | 1          |
| hsa-miR-1266 XM_0244468 | GALNT11 | 1          |
| hsa-miR-513t XM_0244468 | GALNT11 | 1          |
| hsa-miR-1914 XM_0244468 | GALNT11 | 1          |
| hsa-miR-2115 XM_0244468 | GALNT11 | 1          |
| hsa-miR-2681 XM_0244468 | GALNT11 | 1          |
| hsa-miR-718 XM_0244468  | GALNT11 | 1          |
| hsa-miR-313C XM_0244468 | GALNT11 | 1          |

|                                 |   |
|---------------------------------|---|
| hsa-miR-3135 XM_0244468 GALNT11 | 1 |
| hsa-miR-3152 XM_0244468 GALNT11 | 1 |
| hsa-miR-3155 XM_0244468 GALNT11 | 1 |
| hsa-miR-3187 XM_0244468 GALNT11 | 1 |
| hsa-miR-3195 XM_0244468 GALNT11 | 1 |
| hsa-miR-4305 XM_0244468 GALNT11 | 1 |
| hsa-miR-4253 XM_0244468 GALNT11 | 1 |
| hsa-miR-500t XM_0244468 GALNT11 | 1 |
| hsa-miR-3622 XM_0244468 GALNT11 | 1 |
| hsa-miR-3622 XM_0244468 GALNT11 | 1 |
| hsa-miR-3663 XM_0244468 GALNT11 | 1 |
| hsa-miR-3671 XM_0244468 GALNT11 | 1 |
| hsa-miR-3180 XM_0244468 GALNT11 | 1 |
| hsa-miR-3916 XM_0244468 GALNT11 | 1 |
| hsa-miR-3928 XM_0244468 GALNT11 | 1 |
| hsa-miR-3944 XM_0244468 GALNT11 | 1 |
| hsa-miR-4482 XM_0244468 GALNT11 | 1 |
| hsa-miR-4514 XM_0244468 GALNT11 | 1 |
| hsa-miR-4635 XM_0244468 GALNT11 | 1 |
| hsa-miR-4652 XM_0244468 GALNT11 | 1 |
| hsa-miR-4676 XM_0244468 GALNT11 | 1 |
| hsa-miR-4682 XM_0244468 GALNT11 | 1 |
| hsa-miR-4687 XM_0244468 GALNT11 | 1 |
| hsa-miR-4687 XM_0244468 GALNT11 | 1 |
| hsa-miR-4707 XM_0244468 GALNT11 | 1 |
| hsa-miR-4714 XM_0244468 GALNT11 | 1 |
| hsa-miR-4715 XM_0244468 GALNT11 | 1 |
| hsa-miR-4726 XM_0244468 GALNT11 | 1 |
| hsa-miR-4741 XM_0244468 GALNT11 | 1 |
| hsa-miR-4743 XM_0244468 GALNT11 | 1 |
| hsa-miR-4745 XM_0244468 GALNT11 | 1 |
| hsa-miR-4747 XM_0244468 GALNT11 | 1 |
| hsa-miR-4750 XM_0244468 GALNT11 | 1 |
| hsa-miR-4756 XM_0244468 GALNT11 | 1 |
| hsa-miR-4783 XM_0244468 GALNT11 | 1 |
| hsa-miR-5193 XM_0244468 GALNT11 | 1 |
| hsa-miR-548a XM_0244468 GALNT11 | 1 |
| hsa-miR-6503 XM_0244468 GALNT11 | 1 |
| hsa-miR-6736 XM_0244468 GALNT11 | 1 |
| hsa-miR-6737 XM_0244468 GALNT11 | 1 |
| hsa-miR-6748 XM_0244468 GALNT11 | 1 |
| hsa-miR-6765 XM_0244468 GALNT11 | 1 |
| hsa-miR-6778 XM_0244468 GALNT11 | 1 |
| hsa-miR-6783 XM_0244468 GALNT11 | 1 |
| hsa-miR-6795 XM_0244468 GALNT11 | 1 |
| hsa-miR-6815 XM_0244468 GALNT11 | 1 |
| hsa-miR-6821 XM_0244468 GALNT11 | 1 |
| hsa-miR-6828 XM_0244468 GALNT11 | 1 |
| hsa-miR-6841 XM_0244468 GALNT11 | 1 |
| hsa-miR-6842 XM_0244468 GALNT11 | 1 |
| hsa-miR-6843 XM_0244468 GALNT11 | 1 |
| hsa-miR-6856 XM_0244468 GALNT11 | 1 |
| hsa-miR-6855 XM_0244468 GALNT11 | 1 |
| hsa-miR-6862 XM_0244468 GALNT11 | 1 |
| hsa-miR-6872 XM_0244468 GALNT11 | 1 |
| hsa-miR-6872 XM_0244468 GALNT11 | 1 |
| hsa-miR-6874 XM_0244468 GALNT11 | 1 |
| hsa-miR-6876 XM_0244468 GALNT11 | 1 |
| hsa-miR-6877 XM_0244468 GALNT11 | 1 |
| hsa-miR-6888 XM_0244468 GALNT11 | 1 |
| hsa-miR-7156 XM_0244468 GALNT11 | 1 |
| hsa-miR-7160 XM_0244468 GALNT11 | 1 |
| hsa-miR-1273 XM_0244468 GALNT11 | 1 |
| hsa-miR-7845 XM_0244468 GALNT11 | 1 |
| hsa-miR-7847 XM_0244468 GALNT11 | 1 |
| hsa-miR-1039 XM_0244468 GALNT11 | 1 |
| hsa-miR-1039 XM_0244468 GALNT11 | 1 |
| hsa-miR-1040 XM_0244468 GALNT11 | 1 |
| hsa-miR-1039 XM_0244468 GALNT11 | 1 |
| hsa-miR-1211 XM_0244468 GALNT11 | 1 |
| hsa-miR-18a- NM_022087 GALNT11  | 1 |
| hsa-miR-23a- NM_022087 GALNT11  | 1 |
| hsa-miR-214- NM_022087 GALNT11  | 1 |
| hsa-miR-140- NM_022087 GALNT11  | 1 |
| hsa-miR-185- NM_022087 GALNT11  | 1 |
| hsa-miR-106b NM_022087 GALNT11  | 1 |
| hsa-miR-376c NM_022087 GALNT11  | 1 |
| hsa-miR-371a NM_022087 GALNT11  | 1 |
| hsa-miR-377- NM_022087 GALNT11  | 1 |
| hsa-miR-148b NM_022087 GALNT11  | 1 |
| hsa-miR-410- NM_022087 GALNT11  | 1 |
| hsa-miR-376b NM_022087 GALNT11  | 1 |
| hsa-miR-508- NM_022087 GALNT11  | 1 |
| hsa-miR-552- NM_022087 GALNT11  | 1 |
| hsa-miR-647 NM_022087 GALNT11   | 1 |
| hsa-miR-650 NM_022087 GALNT11   | 1 |
| hsa-miR-660- NM_022087 GALNT11  | 1 |
| hsa-miR-1178 NM_022087 GALNT11  | 1 |
| hsa-miR-513b NM_022087 GALNT11  | 1 |
| hsa-miR-2681 NM_022087 GALNT11  | 1 |
| hsa-miR-3155 NM_022087 GALNT11  | 1 |
| hsa-miR-3187 NM_022087 GALNT11  | 1 |
| hsa-miR-4325 NM_022087 GALNT11  | 1 |
| hsa-miR-4262 NM_022087 GALNT11  | 1 |

|              |            |         |   |
|--------------|------------|---------|---|
| hsa-miR-3916 | NM_022087  | GALNT11 | 1 |
| hsa-miR-3943 | NM_022087  | GALNT11 | 1 |
| hsa-miR-4439 | NM_022087  | GALNT11 | 1 |
| hsa-miR-4497 | NM_022087  | GALNT11 | 1 |
| hsa-miR-4652 | NM_022087  | GALNT11 | 1 |
| hsa-miR-4667 | NM_022087  | GALNT11 | 1 |
| hsa-miR-4676 | NM_022087  | GALNT11 | 1 |
| hsa-miR-4715 | NM_022087  | GALNT11 | 1 |
| hsa-miR-4750 | NM_022087  | GALNT11 | 1 |
| hsa-miR-6086 | NM_022087  | GALNT11 | 1 |
| hsa-miR-6728 | NM_022087  | GALNT11 | 1 |
| hsa-miR-6734 | NM_022087  | GALNT11 | 1 |
| hsa-miR-6742 | NM_022087  | GALNT11 | 1 |
| hsa-miR-6772 | NM_022087  | GALNT11 | 1 |
| hsa-miR-6795 | NM_022087  | GALNT11 | 1 |
| hsa-miR-6805 | NM_022087  | GALNT11 | 1 |
| hsa-miR-6821 | NM_022087  | GALNT11 | 1 |
| hsa-miR-6835 | NM_022087  | GALNT11 | 1 |
| hsa-miR-6780 | NM_022087  | GALNT11 | 1 |
| hsa-miR-6841 | NM_022087  | GALNT11 | 1 |
| hsa-miR-6856 | NM_022087  | GALNT11 | 1 |
| hsa-miR-6874 | NM_022087  | GALNT11 | 1 |
| hsa-miR-6876 | NM_022087  | GALNT11 | 1 |
| hsa-miR-6888 | NM_022087  | GALNT11 | 1 |
| hsa-miR-7156 | NM_022087  | GALNT11 | 1 |
| hsa-miR-7845 | NM_022087  | GALNT11 | 1 |
| hsa-miR-1211 | NM_022087  | GALNT11 | 1 |
| hsa-miR-99a- | NM_0013714 | GALNT11 | 1 |
| hsa-miR-139- | NM_0013714 | GALNT11 | 1 |
| hsa-miR-187- | NM_0013714 | GALNT11 | 1 |
| hsa-miR-221- | NM_0013714 | GALNT11 | 1 |
| hsa-miR-23b- | NM_0013714 | GALNT11 | 1 |
| hsa-miR-23b- | NM_0013714 | GALNT11 | 1 |
| hsa-miR-30b- | NM_0013714 | GALNT11 | 1 |
| hsa-miR-135a | NM_0013714 | GALNT11 | 1 |
| hsa-miR-125a | NM_0013714 | GALNT11 | 1 |
| hsa-miR-125b | NM_0013714 | GALNT11 | 1 |
| hsa-miR-193a | NM_0013714 | GALNT11 | 1 |
| hsa-miR-128- | NM_0013714 | GALNT11 | 1 |
| hsa-miR-128- | NM_0013714 | GALNT11 | 1 |
| hsa-miR-106b | NM_0013714 | GALNT11 | 1 |
| hsa-miR-381- | NM_0013714 | GALNT11 | 1 |
| hsa-miR-423- | NM_0013714 | GALNT11 | 1 |
| hsa-miR-432- | NM_0013714 | GALNT11 | 1 |
| hsa-miR-193b | NM_0013714 | GALNT11 | 1 |
| hsa-miR-508- | NM_0013714 | GALNT11 | 1 |
| hsa-miR-584- | NM_0013714 | GALNT11 | 1 |
| hsa-miR-616- | NM_0013714 | GALNT11 | 1 |
| hsa-miR-616- | NM_0013714 | GALNT11 | 1 |
| hsa-miR-622  | NM_0013714 | GALNT11 | 1 |
| hsa-miR-648  | NM_0013714 | GALNT11 | 1 |
| hsa-miR-650  | NM_0013714 | GALNT11 | 1 |
| hsa-miR-542- | NM_0013714 | GALNT11 | 1 |
| hsa-miR-542- | NM_0013714 | GALNT11 | 1 |
| hsa-miR-1224 | NM_0013714 | GALNT11 | 1 |
| hsa-miR-766- | NM_0013714 | GALNT11 | 1 |
| hsa-miR-298  | NM_0013714 | GALNT11 | 1 |
| hsa-miR-892a | NM_0013714 | GALNT11 | 1 |
| hsa-miR-920  | NM_0013714 | GALNT11 | 1 |
| hsa-miR-937- | NM_0013714 | GALNT11 | 1 |
| hsa-miR-1285 | NM_0013714 | GALNT11 | 1 |
| hsa-miR-1290 | NM_0013714 | GALNT11 | 1 |
| hsa-miR-1293 | NM_0013714 | GALNT11 | 1 |
| hsa-miR-1275 | NM_0013714 | GALNT11 | 1 |
| hsa-miR-1910 | NM_0013714 | GALNT11 | 1 |
| hsa-miR-2115 | NM_0013714 | GALNT11 | 1 |
| hsa-miR-2276 | NM_0013714 | GALNT11 | 1 |
| hsa-miR-3131 | NM_0013714 | GALNT11 | 1 |
| hsa-miR-3132 | NM_0013714 | GALNT11 | 1 |
| hsa-miR-3137 | NM_0013714 | GALNT11 | 1 |
| hsa-miR-3151 | NM_0013714 | GALNT11 | 1 |
| hsa-miR-3154 | NM_0013714 | GALNT11 | 1 |
| hsa-miR-3158 | NM_0013714 | GALNT11 | 1 |
| hsa-miR-3162 | NM_0013714 | GALNT11 | 1 |
| hsa-miR-3170 | NM_0013714 | GALNT11 | 1 |
| hsa-miR-3177 | NM_0013714 | GALNT11 | 1 |
| hsa-miR-3190 | NM_0013714 | GALNT11 | 1 |
| hsa-miR-3196 | NM_0013714 | GALNT11 | 1 |
| hsa-miR-4296 | NM_0013714 | GALNT11 | 1 |
| hsa-miR-4300 | NM_0013714 | GALNT11 | 1 |
| hsa-miR-4304 | NM_0013714 | GALNT11 | 1 |
| hsa-miR-4311 | NM_0013714 | GALNT11 | 1 |
| hsa-miR-4257 | NM_0013714 | GALNT11 | 1 |
| hsa-miR-3667 | NM_0013714 | GALNT11 | 1 |
| hsa-miR-3150 | NM_0013714 | GALNT11 | 1 |
| hsa-miR-3922 | NM_0013714 | GALNT11 | 1 |
| hsa-miR-4421 | NM_0013714 | GALNT11 | 1 |
| hsa-miR-4464 | NM_0013714 | GALNT11 | 1 |
| hsa-miR-4468 | NM_0013714 | GALNT11 | 1 |
| hsa-miR-4478 | NM_0013714 | GALNT11 | 1 |
| hsa-miR-4478 | NM_0013714 | GALNT11 | 1 |
| hsa-miR-4482 | NM_0013714 | GALNT11 | 1 |
| hsa-miR-4491 | NM_0013714 | GALNT11 | 1 |
| hsa-miR-4494 | NM_0013714 | GALNT11 | 1 |

|                                 |   |
|---------------------------------|---|
| hsa-miR-4516 NM_0013714 GALNT11 | 1 |
| hsa-miR-4646 NM_0013714 GALNT11 | 1 |
| hsa-miR-4652 NM_0013714 GALNT11 | 1 |
| hsa-miR-466C NM_0013714 GALNT11 | 1 |
| hsa-miR-466C NM_0013714 GALNT11 | 1 |
| hsa-miR-469C NM_0013714 GALNT11 | 1 |
| hsa-miR-470C NM_0013714 GALNT11 | 1 |
| hsa-miR-4731 NM_0013714 GALNT11 | 1 |
| hsa-miR-4731 NM_0013714 GALNT11 | 1 |
| hsa-miR-4731 NM_0013714 GALNT11 | 1 |
| hsa-miR-4748 NM_0013714 GALNT11 | 1 |
| hsa-miR-4795 NM_0013714 GALNT11 | 1 |
| hsa-miR-5085 NM_0013714 GALNT11 | 1 |
| hsa-miR-5685 NM_0013714 GALNT11 | 1 |
| hsa-miR-4666 NM_0013714 GALNT11 | 1 |
| hsa-miR-5735 NM_0013714 GALNT11 | 1 |
| hsa-miR-5735 NM_0013714 GALNT11 | 1 |
| hsa-miR-6075 NM_0013714 GALNT11 | 1 |
| hsa-miR-6125 NM_0013714 GALNT11 | 1 |
| hsa-miR-6132 NM_0013714 GALNT11 | 1 |
| hsa-miR-6165 NM_0013714 GALNT11 | 1 |
| hsa-miR-6501 NM_0013714 GALNT11 | 1 |
| hsa-miR-6505 NM_0013714 GALNT11 | 1 |
| hsa-miR-6512 NM_0013714 GALNT11 | 1 |
| hsa-miR-6721 NM_0013714 GALNT11 | 1 |
| hsa-miR-6735 NM_0013714 GALNT11 | 1 |
| hsa-miR-676C NM_0013714 GALNT11 | 1 |
| hsa-miR-6772 NM_0013714 GALNT11 | 1 |
| hsa-miR-6778 NM_0013714 GALNT11 | 1 |
| hsa-miR-678C NM_0013714 GALNT11 | 1 |
| hsa-miR-6794 NM_0013714 GALNT11 | 1 |
| hsa-miR-6795 NM_0013714 GALNT11 | 1 |
| hsa-miR-6802 NM_0013714 GALNT11 | 1 |
| hsa-miR-6807 NM_0013714 GALNT11 | 1 |
| hsa-miR-6815 NM_0013714 GALNT11 | 1 |
| hsa-miR-6824 NM_0013714 GALNT11 | 1 |
| hsa-miR-6825 NM_0013714 GALNT11 | 1 |
| hsa-miR-6827 NM_0013714 GALNT11 | 1 |
| hsa-miR-6834 NM_0013714 GALNT11 | 1 |
| hsa-miR-678C NM_0013714 GALNT11 | 1 |
| hsa-miR-6855 NM_0013714 GALNT11 | 1 |
| hsa-miR-6856 NM_0013714 GALNT11 | 1 |
| hsa-miR-6855 NM_0013714 GALNT11 | 1 |
| hsa-miR-6873 NM_0013714 GALNT11 | 1 |
| hsa-miR-688C NM_0013714 GALNT11 | 1 |
| hsa-miR-6885 NM_0013714 GALNT11 | 1 |
| hsa-miR-6894 NM_0013714 GALNT11 | 1 |
| hsa-miR-6895 NM_0013714 GALNT11 | 1 |
| hsa-miR-7106 NM_0013714 GALNT11 | 1 |
| hsa-miR-7154 NM_0013714 GALNT11 | 1 |
| hsa-miR-8075 NM_0013714 GALNT11 | 1 |
| hsa-miR-104C NM_0013714 GALNT11 | 1 |
| hsa-miR-6525 NM_0013714 GALNT11 | 1 |
| hsa-miR-1213 NM_0013714 GALNT11 | 1 |
| hsa-miR-99a- NM_0013714 GALNT11 | 1 |
| hsa-miR-139- NM_0013714 GALNT11 | 1 |
| hsa-miR-221- NM_0013714 GALNT11 | 1 |
| hsa-miR-23b- NM_0013714 GALNT11 | 1 |
| hsa-miR-23b- NM_0013714 GALNT11 | 1 |
| hsa-miR-135a NM_0013714 GALNT11 | 1 |
| hsa-miR-138- NM_0013714 GALNT11 | 1 |
| hsa-miR-125a NM_0013714 GALNT11 | 1 |
| hsa-miR-129- NM_0013714 GALNT11 | 1 |
| hsa-miR-185- NM_0013714 GALNT11 | 1 |
| hsa-miR-193a NM_0013714 GALNT11 | 1 |
| hsa-miR-128- NM_0013714 GALNT11 | 1 |
| hsa-miR-128- NM_0013714 GALNT11 | 1 |
| hsa-miR-106b NM_0013714 GALNT11 | 1 |
| hsa-miR-381- NM_0013714 GALNT11 | 1 |
| hsa-miR-329- NM_0013714 GALNT11 | 1 |
| hsa-miR-193b NM_0013714 GALNT11 | 1 |
| hsa-miR-503- NM_0013714 GALNT11 | 1 |
| hsa-miR-584- NM_0013714 GALNT11 | 1 |
| hsa-miR-615- NM_0013714 GALNT11 | 1 |
| hsa-miR-616- NM_0013714 GALNT11 | 1 |
| hsa-miR-616- NM_0013714 GALNT11 | 1 |
| hsa-miR-622 NM_0013714 GALNT11  | 1 |
| hsa-miR-648 NM_0013714 GALNT11  | 1 |
| hsa-miR-650 NM_0013714 GALNT11  | 1 |
| hsa-miR-654- NM_0013714 GALNT11 | 1 |
| hsa-miR-542- NM_0013714 GALNT11 | 1 |
| hsa-miR-542- NM_0013714 GALNT11 | 1 |
| hsa-miR-1224 NM_0013714 GALNT11 | 1 |
| hsa-miR-766- NM_0013714 GALNT11 | 1 |
| hsa-miR-770- NM_0013714 GALNT11 | 1 |
| hsa-miR-298 NM_0013714 GALNT11  | 1 |
| hsa-miR-892a NM_0013714 GALNT11 | 1 |
| hsa-miR-920 NM_0013714 GALNT11  | 1 |
| hsa-miR-937- NM_0013714 GALNT11 | 1 |
| hsa-miR-1285 NM_0013714 GALNT11 | 1 |
| hsa-miR-129C NM_0013714 GALNT11 | 1 |
| hsa-miR-1293 NM_0013714 GALNT11 | 1 |
| hsa-miR-1535 NM_0013714 GALNT11 | 1 |
| hsa-miR-191C NM_0013714 GALNT11 | 1 |



|                                 |            |
|---------------------------------|------------|
| hsa-miR-678C NM_0013714 GALNT11 | 1          |
| hsa-miR-6856 NM_0013714 GALNT11 | 1          |
| hsa-miR-6869 NM_0013714 GALNT11 | 1          |
| hsa-miR-6873 NM_0013714 GALNT11 | 1          |
| hsa-miR-688C NM_0013714 GALNT11 | 1          |
| hsa-miR-6889 NM_0013714 GALNT11 | 1          |
| hsa-miR-689C NM_0013714 GALNT11 | 1          |
| hsa-miR-6895 NM_0013714 GALNT11 | 1          |
| hsa-miR-7154 NM_0013714 GALNT11 | 1          |
| hsa-miR-8075 NM_0013714 GALNT11 | 1          |
| hsa-miR-1022 NM_0013714 GALNT11 | 1          |
| hsa-miR-104C NM_0013714 GALNT11 | 1          |
| hsa-miR-6529 NM_0013714 GALNT11 | 1          |
| hsa-miR-1213 NM_0013714 GALNT11 | 1          |
| hsa-miR-193a NM_0013061 FN1     | 0.97435897 |
| hsa-miR-193a NM_212474 FN1      | 0.97435897 |
| hsa-miR-193a NM_212476 FN1      | 0.97435897 |
| hsa-miR-193a NM_212478 FN1      | 0.97435897 |
| hsa-miR-193a NM_212482 FN1      | 0.97435897 |
| hsa-miR-193a NM_0013655 FN1     | 0.97435897 |
| hsa-miR-193a NM_002026 FN1      | 0.97435897 |
| hsa-let-7b-5p NM_0013061 FN1    | 1          |
| hsa-miR-214- NM_0013061 FN1     | 1          |
| hsa-miR-125t NM_0013061 FN1     | 1          |
| hsa-miR-127- NM_0013061 FN1     | 1          |
| hsa-miR-551t NM_0013061 FN1     | 1          |
| hsa-miR-1261 NM_0013061 FN1     | 1          |
| hsa-miR-191C NM_0013061 FN1     | 1          |
| hsa-miR-378t NM_0013061 FN1     | 1          |
| hsa-miR-3157 NM_0013061 FN1     | 1          |
| hsa-miR-3188 NM_0013061 FN1     | 1          |
| hsa-miR-4296 NM_0013061 FN1     | 1          |
| hsa-miR-430C NM_0013061 FN1     | 1          |
| hsa-miR-428C NM_0013061 FN1     | 1          |
| hsa-miR-3655 NM_0013061 FN1     | 1          |
| hsa-miR-4436 NM_0013061 FN1     | 1          |
| hsa-miR-449C NM_0013061 FN1     | 1          |
| hsa-miR-4655 NM_0013061 FN1     | 1          |
| hsa-miR-4755 NM_0013061 FN1     | 1          |
| hsa-miR-664t NM_0013061 FN1     | 1          |
| hsa-miR-6511 NM_0013061 FN1     | 1          |
| hsa-miR-675C NM_0013061 FN1     | 1          |
| hsa-miR-6839 NM_0013061 FN1     | 1          |
| hsa-miR-6849 NM_0013061 FN1     | 1          |
| hsa-miR-6895 NM_0013061 FN1     | 1          |
| hsa-miR-7162 NM_0013061 FN1     | 1          |
| hsa-miR-9985 NM_0013061 FN1     | 1          |
| hsa-let-7b-5p NM_0013061 FN1    | 1          |
| hsa-miR-214- NM_0013061 FN1     | 1          |
| hsa-miR-125t NM_0013061 FN1     | 1          |
| hsa-miR-127- NM_0013061 FN1     | 1          |
| hsa-miR-219a NM_0013061 FN1     | 1          |
| hsa-miR-551t NM_0013061 FN1     | 1          |
| hsa-miR-1261 NM_0013061 FN1     | 1          |
| hsa-miR-191C NM_0013061 FN1     | 1          |
| hsa-miR-378t NM_0013061 FN1     | 1          |
| hsa-miR-3157 NM_0013061 FN1     | 1          |
| hsa-miR-3188 NM_0013061 FN1     | 1          |
| hsa-miR-4296 NM_0013061 FN1     | 1          |
| hsa-miR-430C NM_0013061 FN1     | 1          |
| hsa-miR-428C NM_0013061 FN1     | 1          |
| hsa-miR-3655 NM_0013061 FN1     | 1          |
| hsa-miR-4436 NM_0013061 FN1     | 1          |
| hsa-miR-449C NM_0013061 FN1     | 1          |
| hsa-miR-4655 NM_0013061 FN1     | 1          |
| hsa-miR-4755 NM_0013061 FN1     | 1          |
| hsa-miR-664t NM_0013061 FN1     | 1          |
| hsa-miR-6511 NM_0013061 FN1     | 1          |
| hsa-miR-675C NM_0013061 FN1     | 1          |
| hsa-miR-6839 NM_0013061 FN1     | 1          |
| hsa-miR-6849 NM_0013061 FN1     | 1          |
| hsa-miR-6895 NM_0013061 FN1     | 1          |
| hsa-miR-7162 NM_0013061 FN1     | 1          |
| hsa-miR-9985 NM_0013061 FN1     | 1          |
| hsa-let-7b-5p NM_0013061 FN1    | 1          |
| hsa-miR-214- NM_0013061 FN1     | 1          |
| hsa-miR-125t NM_0013061 FN1     | 1          |
| hsa-miR-127- NM_0013061 FN1     | 1          |
| hsa-miR-551t NM_0013061 FN1     | 1          |
| hsa-miR-33b- NM_0013061 FN1     | 1          |
| hsa-miR-1261 NM_0013061 FN1     | 1          |
| hsa-miR-191C NM_0013061 FN1     | 1          |
| hsa-miR-378t NM_0013061 FN1     | 1          |
| hsa-miR-3157 NM_0013061 FN1     | 1          |
| hsa-miR-3188 NM_0013061 FN1     | 1          |
| hsa-miR-4296 NM_0013061 FN1     | 1          |
| hsa-miR-430C NM_0013061 FN1     | 1          |
| hsa-miR-428C NM_0013061 FN1     | 1          |
| hsa-miR-3655 NM_0013061 FN1     | 1          |
| hsa-miR-4436 NM_0013061 FN1     | 1          |
| hsa-miR-449C NM_0013061 FN1     | 1          |

|                              |   |
|------------------------------|---|
| hsa-miR-4655 NM_0013061 FN1  | 1 |
| hsa-miR-4755 NM_0013061 FN1  | 1 |
| hsa-miR-548a NM_0013061 FN1  | 1 |
| hsa-miR-664t NM_0013061 FN1  | 1 |
| hsa-miR-6511 NM_0013061 FN1  | 1 |
| hsa-miR-6750 NM_0013061 FN1  | 1 |
| hsa-miR-6839 NM_0013061 FN1  | 1 |
| hsa-miR-6849 NM_0013061 FN1  | 1 |
| hsa-miR-6895 NM_0013061 FN1  | 1 |
| hsa-miR-7162 NM_0013061 FN1  | 1 |
| hsa-miR-9985 NM_0013061 FN1  | 1 |
| hsa-let-7b-5p NM_0013061 FN1 | 1 |
| hsa-miR-214- NM_0013061 FN1  | 1 |
| hsa-miR-125t NM_0013061 FN1  | 1 |
| hsa-miR-127- NM_0013061 FN1  | 1 |
| hsa-miR-219a NM_0013061 FN1  | 1 |
| hsa-miR-551t NM_0013061 FN1  | 1 |
| hsa-miR-33b- NM_0013061 FN1  | 1 |
| hsa-miR-1261 NM_0013061 FN1  | 1 |
| hsa-miR-1910 NM_0013061 FN1  | 1 |
| hsa-miR-378t NM_0013061 FN1  | 1 |
| hsa-miR-3157 NM_0013061 FN1  | 1 |
| hsa-miR-3188 NM_0013061 FN1  | 1 |
| hsa-miR-4296 NM_0013061 FN1  | 1 |
| hsa-miR-4300 NM_0013061 FN1  | 1 |
| hsa-miR-4280 NM_0013061 FN1  | 1 |
| hsa-miR-3655 NM_0013061 FN1  | 1 |
| hsa-miR-4436 NM_0013061 FN1  | 1 |
| hsa-miR-4490 NM_0013061 FN1  | 1 |
| hsa-miR-4655 NM_0013061 FN1  | 1 |
| hsa-miR-4755 NM_0013061 FN1  | 1 |
| hsa-miR-548a NM_0013061 FN1  | 1 |
| hsa-miR-664t NM_0013061 FN1  | 1 |
| hsa-miR-6511 NM_0013061 FN1  | 1 |
| hsa-miR-6750 NM_0013061 FN1  | 1 |
| hsa-miR-6839 NM_0013061 FN1  | 1 |
| hsa-miR-6849 NM_0013061 FN1  | 1 |
| hsa-miR-6895 NM_0013061 FN1  | 1 |
| hsa-miR-7162 NM_0013061 FN1  | 1 |
| hsa-miR-9985 NM_0013061 FN1  | 1 |
| hsa-miR-204- NM_054034 FN1   | 1 |
| hsa-miR-133a NM_054034 FN1   | 1 |
| hsa-miR-320a NM_054034 FN1   | 1 |
| hsa-miR-629- NM_054034 FN1   | 1 |
| hsa-miR-320b NM_054034 FN1   | 1 |
| hsa-miR-320c NM_054034 FN1   | 1 |
| hsa-miR-320d NM_054034 FN1   | 1 |
| hsa-miR-4429 NM_054034 FN1   | 1 |
| hsa-miR-4448 NM_054034 FN1   | 1 |
| hsa-miR-6718 NM_054034 FN1   | 1 |
| hsa-miR-7848 NM_054034 FN1   | 1 |
| hsa-let-7b-5p NM_212474 FN1  | 1 |
| hsa-miR-214- NM_212474 FN1   | 1 |
| hsa-miR-125t NM_212474 FN1   | 1 |
| hsa-miR-127- NM_212474 FN1   | 1 |
| hsa-miR-219a NM_212474 FN1   | 1 |
| hsa-miR-551t NM_212474 FN1   | 1 |
| hsa-miR-33b- NM_212474 FN1   | 1 |
| hsa-miR-1261 NM_212474 FN1   | 1 |
| hsa-miR-1910 NM_212474 FN1   | 1 |
| hsa-miR-378t NM_212474 FN1   | 1 |
| hsa-miR-3157 NM_212474 FN1   | 1 |
| hsa-miR-3188 NM_212474 FN1   | 1 |
| hsa-miR-4296 NM_212474 FN1   | 1 |
| hsa-miR-4300 NM_212474 FN1   | 1 |
| hsa-miR-4280 NM_212474 FN1   | 1 |
| hsa-miR-3655 NM_212474 FN1   | 1 |
| hsa-miR-4436 NM_212474 FN1   | 1 |
| hsa-miR-4490 NM_212474 FN1   | 1 |
| hsa-miR-4655 NM_212474 FN1   | 1 |
| hsa-miR-4755 NM_212474 FN1   | 1 |
| hsa-miR-548a NM_212474 FN1   | 1 |
| hsa-miR-664t NM_212474 FN1   | 1 |
| hsa-miR-6511 NM_212474 FN1   | 1 |
| hsa-miR-6750 NM_212474 FN1   | 1 |
| hsa-miR-6839 NM_212474 FN1   | 1 |
| hsa-miR-6849 NM_212474 FN1   | 1 |
| hsa-miR-6895 NM_212474 FN1   | 1 |
| hsa-miR-7162 NM_212474 FN1   | 1 |
| hsa-miR-9985 NM_212474 FN1   | 1 |
| hsa-let-7b-5p NM_212476 FN1  | 1 |
| hsa-miR-214- NM_212476 FN1   | 1 |
| hsa-miR-125t NM_212476 FN1   | 1 |
| hsa-miR-127- NM_212476 FN1   | 1 |
| hsa-miR-551t NM_212476 FN1   | 1 |
| hsa-miR-33b- NM_212476 FN1   | 1 |
| hsa-miR-1261 NM_212476 FN1   | 1 |
| hsa-miR-1910 NM_212476 FN1   | 1 |
| hsa-miR-378t NM_212476 FN1   | 1 |
| hsa-miR-3157 NM_212476 FN1   | 1 |
| hsa-miR-3188 NM_212476 FN1   | 1 |
| hsa-miR-4296 NM_212476 FN1   | 1 |
| hsa-miR-4300 NM_212476 FN1   | 1 |
| hsa-miR-4280 NM_212476 FN1   | 1 |

|                          |     |   |
|--------------------------|-----|---|
| hsa-miR-3655 NM_212476   | FN1 | 1 |
| hsa-miR-4436 NM_212476   | FN1 | 1 |
| hsa-miR-4490 NM_212476   | FN1 | 1 |
| hsa-miR-4655 NM_212476   | FN1 | 1 |
| hsa-miR-4755 NM_212476   | FN1 | 1 |
| hsa-miR-548a NM_212476   | FN1 | 1 |
| hsa-miR-664t NM_212476   | FN1 | 1 |
| hsa-miR-6511 NM_212476   | FN1 | 1 |
| hsa-miR-6750 NM_212476   | FN1 | 1 |
| hsa-miR-6839 NM_212476   | FN1 | 1 |
| hsa-miR-6849 NM_212476   | FN1 | 1 |
| hsa-miR-6895 NM_212476   | FN1 | 1 |
| hsa-miR-7162 NM_212476   | FN1 | 1 |
| hsa-miR-9985 NM_212476   | FN1 | 1 |
| hsa-let-7b-5p NM_212478  | FN1 | 1 |
| hsa-miR-214- NM_212478   | FN1 | 1 |
| hsa-miR-125t NM_212478   | FN1 | 1 |
| hsa-miR-127- NM_212478   | FN1 | 1 |
| hsa-miR-219a NM_212478   | FN1 | 1 |
| hsa-miR-551t NM_212478   | FN1 | 1 |
| hsa-miR-33b- NM_212478   | FN1 | 1 |
| hsa-miR-1261 NM_212478   | FN1 | 1 |
| hsa-miR-1910 NM_212478   | FN1 | 1 |
| hsa-miR-378t NM_212478   | FN1 | 1 |
| hsa-miR-3157 NM_212478   | FN1 | 1 |
| hsa-miR-3188 NM_212478   | FN1 | 1 |
| hsa-miR-4296 NM_212478   | FN1 | 1 |
| hsa-miR-4300 NM_212478   | FN1 | 1 |
| hsa-miR-4280 NM_212478   | FN1 | 1 |
| hsa-miR-3655 NM_212478   | FN1 | 1 |
| hsa-miR-4436 NM_212478   | FN1 | 1 |
| hsa-miR-4490 NM_212478   | FN1 | 1 |
| hsa-miR-4655 NM_212478   | FN1 | 1 |
| hsa-miR-4755 NM_212478   | FN1 | 1 |
| hsa-miR-664t NM_212478   | FN1 | 1 |
| hsa-miR-6511 NM_212478   | FN1 | 1 |
| hsa-miR-6750 NM_212478   | FN1 | 1 |
| hsa-miR-6839 NM_212478   | FN1 | 1 |
| hsa-miR-6849 NM_212478   | FN1 | 1 |
| hsa-miR-6895 NM_212478   | FN1 | 1 |
| hsa-miR-7162 NM_212478   | FN1 | 1 |
| hsa-miR-9985 NM_212478   | FN1 | 1 |
| hsa-let-7b-5p NM_212482  | FN1 | 1 |
| hsa-miR-214- NM_212482   | FN1 | 1 |
| hsa-miR-125t NM_212482   | FN1 | 1 |
| hsa-miR-127- NM_212482   | FN1 | 1 |
| hsa-miR-551t NM_212482   | FN1 | 1 |
| hsa-miR-1261 NM_212482   | FN1 | 1 |
| hsa-miR-1910 NM_212482   | FN1 | 1 |
| hsa-miR-378t NM_212482   | FN1 | 1 |
| hsa-miR-3157 NM_212482   | FN1 | 1 |
| hsa-miR-3188 NM_212482   | FN1 | 1 |
| hsa-miR-4296 NM_212482   | FN1 | 1 |
| hsa-miR-4300 NM_212482   | FN1 | 1 |
| hsa-miR-4280 NM_212482   | FN1 | 1 |
| hsa-miR-3655 NM_212482   | FN1 | 1 |
| hsa-miR-4436 NM_212482   | FN1 | 1 |
| hsa-miR-4490 NM_212482   | FN1 | 1 |
| hsa-miR-4655 NM_212482   | FN1 | 1 |
| hsa-miR-4755 NM_212482   | FN1 | 1 |
| hsa-miR-664t NM_212482   | FN1 | 1 |
| hsa-miR-6511 NM_212482   | FN1 | 1 |
| hsa-miR-6750 NM_212482   | FN1 | 1 |
| hsa-miR-6839 NM_212482   | FN1 | 1 |
| hsa-miR-6849 NM_212482   | FN1 | 1 |
| hsa-miR-6895 NM_212482   | FN1 | 1 |
| hsa-miR-7162 NM_212482   | FN1 | 1 |
| hsa-miR-9985 NM_212482   | FN1 | 1 |
| hsa-let-7b-5p NM_0013655 | FN1 | 1 |
| hsa-miR-214- NM_0013655  | FN1 | 1 |
| hsa-miR-125t NM_0013655  | FN1 | 1 |
| hsa-miR-127- NM_0013655  | FN1 | 1 |
| hsa-miR-551t NM_0013655  | FN1 | 1 |
| hsa-miR-33b- NM_0013655  | FN1 | 1 |
| hsa-miR-1261 NM_0013655  | FN1 | 1 |
| hsa-miR-1910 NM_0013655  | FN1 | 1 |
| hsa-miR-378t NM_0013655  | FN1 | 1 |
| hsa-miR-3157 NM_0013655  | FN1 | 1 |
| hsa-miR-3188 NM_0013655  | FN1 | 1 |
| hsa-miR-4296 NM_0013655  | FN1 | 1 |
| hsa-miR-4300 NM_0013655  | FN1 | 1 |
| hsa-miR-4280 NM_0013655  | FN1 | 1 |
| hsa-miR-3655 NM_0013655  | FN1 | 1 |
| hsa-miR-4436 NM_0013655  | FN1 | 1 |
| hsa-miR-4490 NM_0013655  | FN1 | 1 |
| hsa-miR-4655 NM_0013655  | FN1 | 1 |
| hsa-miR-4755 NM_0013655  | FN1 | 1 |
| hsa-miR-664t NM_0013655  | FN1 | 1 |
| hsa-miR-6511 NM_0013655  | FN1 | 1 |
| hsa-miR-6750 NM_0013655  | FN1 | 1 |
| hsa-miR-6839 NM_0013655  | FN1 | 1 |
| hsa-miR-6849 NM_0013655  | FN1 | 1 |
| hsa-miR-6895 NM_0013655  | FN1 | 1 |
| hsa-miR-7162 NM_0013655  | FN1 | 1 |



|                                  |            |
|----------------------------------|------------|
| hsa-miR-9985 NM_0013655 FN1      | 1          |
| hsa-let-7b-5p NM_002026 FN1      | 1          |
| hsa-miR-214- NM_002026 FN1       | 1          |
| hsa-miR-125t NM_002026 FN1       | 1          |
| hsa-miR-127- NM_002026 FN1       | 1          |
| hsa-miR-551t NM_002026 FN1       | 1          |
| hsa-miR-33b- NM_002026 FN1       | 1          |
| hsa-miR-1261 NM_002026 FN1       | 1          |
| hsa-miR-191c NM_002026 FN1       | 1          |
| hsa-miR-378t NM_002026 FN1       | 1          |
| hsa-miR-3157 NM_002026 FN1       | 1          |
| hsa-miR-3188 NM_002026 FN1       | 1          |
| hsa-miR-4296 NM_002026 FN1       | 1          |
| hsa-miR-430c NM_002026 FN1       | 1          |
| hsa-miR-428c NM_002026 FN1       | 1          |
| hsa-miR-3655 NM_002026 FN1       | 1          |
| hsa-miR-4436 NM_002026 FN1       | 1          |
| hsa-miR-449c NM_002026 FN1       | 1          |
| hsa-miR-4655 NM_002026 FN1       | 1          |
| hsa-miR-4755 NM_002026 FN1       | 1          |
| hsa-miR-664t NM_002026 FN1       | 1          |
| hsa-miR-6511 NM_002026 FN1       | 1          |
| hsa-miR-675c NM_002026 FN1       | 1          |
| hsa-miR-6835 NM_002026 FN1       | 1          |
| hsa-miR-6845 NM_002026 FN1       | 1          |
| hsa-miR-6895 NM_002026 FN1       | 1          |
| hsa-miR-7162 NM_002026 FN1       | 1          |
| hsa-miR-9985 NM_002026 FN1       | 1          |
| hsa-miR-140- NM_015896 ZMYND10   | 0.95384615 |
| hsa-miR-8071 NM_0013083 ZMYND10  | 0.96153846 |
| hsa-miR-8071 NM_015896 ZMYND10   | 0.96153846 |
| hsa-miR-651c NM_015896 ZMYND10   | 0.97802198 |
| hsa-miR-4732 NM_0013083 ZMYND10  | 0.98076923 |
| hsa-miR-4732 NM_015896 ZMYND10   | 0.98076923 |
| hsa-miR-15a- NM_0013083 ZMYND10  | 1          |
| hsa-miR-25-5j NM_0013083 ZMYND10 | 1          |
| hsa-miR-30c- NM_0013083 ZMYND10  | 1          |
| hsa-miR-34a- NM_0013083 ZMYND10  | 1          |
| hsa-miR-222- NM_0013083 ZMYND10  | 1          |
| hsa-miR-15b- NM_0013083 ZMYND10  | 1          |
| hsa-miR-23b- NM_0013083 ZMYND10  | 1          |
| hsa-miR-23b- NM_0013083 ZMYND10  | 1          |
| hsa-miR-140- NM_0013083 ZMYND10  | 1          |
| hsa-miR-193a NM_0013083 ZMYND10  | 1          |
| hsa-miR-376c NM_0013083 ZMYND10  | 1          |
| hsa-miR-328- NM_0013083 ZMYND10  | 1          |
| hsa-miR-328- NM_0013083 ZMYND10  | 1          |
| hsa-miR-342- NM_0013083 ZMYND10  | 1          |
| hsa-miR-485- NM_0013083 ZMYND10  | 1          |
| hsa-miR-485- NM_0013083 ZMYND10  | 1          |
| hsa-miR-432- NM_0013083 ZMYND10  | 1          |
| hsa-miR-497- NM_0013083 ZMYND10  | 1          |
| hsa-miR-518c NM_0013083 ZMYND10  | 1          |
| hsa-miR-593- NM_0013083 ZMYND10  | 1          |
| hsa-miR-614 NM_0013083 ZMYND10   | 1          |
| hsa-miR-638 NM_0013083 ZMYND10   | 1          |
| hsa-miR-662 NM_0013083 ZMYND10   | 1          |
| hsa-miR-874- NM_0013083 ZMYND10  | 1          |
| hsa-miR-937- NM_0013083 ZMYND10  | 1          |
| hsa-miR-939- NM_0013083 ZMYND10  | 1          |
| hsa-miR-1233 NM_0013083 ZMYND10  | 1          |
| hsa-miR-1287 NM_0013083 ZMYND10  | 1          |
| hsa-miR-1294 NM_0013083 ZMYND10  | 1          |
| hsa-miR-1295 NM_0013083 ZMYND10  | 1          |
| hsa-miR-1251 NM_0013083 ZMYND10  | 1          |
| hsa-miR-1292 NM_0013083 ZMYND10  | 1          |
| hsa-miR-1307 NM_0013083 ZMYND10  | 1          |
| hsa-miR-3152 NM_0013083 ZMYND10  | 1          |
| hsa-miR-3162 NM_0013083 ZMYND10  | 1          |
| hsa-miR-317c NM_0013083 ZMYND10  | 1          |
| hsa-miR-3173 NM_0013083 ZMYND10  | 1          |
| hsa-miR-4257 NM_0013083 ZMYND10  | 1          |
| hsa-miR-428c NM_0013083 ZMYND10  | 1          |
| hsa-miR-429c NM_0013083 ZMYND10  | 1          |
| hsa-miR-3614 NM_0013083 ZMYND10  | 1          |
| hsa-miR-3691 NM_0013083 ZMYND10  | 1          |
| hsa-miR-3922 NM_0013083 ZMYND10  | 1          |
| hsa-miR-4442 NM_0013083 ZMYND10  | 1          |
| hsa-miR-4446 NM_0013083 ZMYND10  | 1          |
| hsa-miR-4448 NM_0013083 ZMYND10  | 1          |
| hsa-miR-4454 NM_0013083 ZMYND10  | 1          |
| hsa-miR-4463 NM_0013083 ZMYND10  | 1          |
| hsa-miR-4485 NM_0013083 ZMYND10  | 1          |
| hsa-miR-4485 NM_0013083 ZMYND10  | 1          |
| hsa-miR-466c NM_0013083 ZMYND10  | 1          |
| hsa-miR-4687 NM_0013083 ZMYND10  | 1          |
| hsa-miR-4706 NM_0013083 ZMYND10  | 1          |
| hsa-miR-4722 NM_0013083 ZMYND10  | 1          |
| hsa-miR-4736 NM_0013083 ZMYND10  | 1          |
| hsa-miR-4756 NM_0013083 ZMYND10  | 1          |
| hsa-miR-4784 NM_0013083 ZMYND10  | 1          |
| hsa-miR-4785 NM_0013083 ZMYND10  | 1          |
| hsa-miR-480c NM_0013083 ZMYND10  | 1          |
| hsa-miR-5691 NM_0013083 ZMYND10  | 1          |

|                                 |   |
|---------------------------------|---|
| hsa-miR-6086 NM_0013083 ZMYND10 | 1 |
| hsa-miR-6125 NM_0013083 ZMYND10 | 1 |
| hsa-miR-6127 NM_0013083 ZMYND10 | 1 |
| hsa-miR-6127 NM_0013083 ZMYND10 | 1 |
| hsa-miR-6514 NM_0013083 ZMYND10 | 1 |
| hsa-miR-6721 NM_0013083 ZMYND10 | 1 |
| hsa-miR-6728 NM_0013083 ZMYND10 | 1 |
| hsa-miR-6729 NM_0013083 ZMYND10 | 1 |
| hsa-miR-6732 NM_0013083 ZMYND10 | 1 |
| hsa-miR-6736 NM_0013083 ZMYND10 | 1 |
| hsa-miR-6751 NM_0013083 ZMYND10 | 1 |
| hsa-miR-6756 NM_0013083 ZMYND10 | 1 |
| hsa-miR-6756 NM_0013083 ZMYND10 | 1 |
| hsa-miR-6761 NM_0013083 ZMYND10 | 1 |
| hsa-miR-6764 NM_0013083 ZMYND10 | 1 |
| hsa-miR-6766 NM_0013083 ZMYND10 | 1 |
| hsa-miR-6767 NM_0013083 ZMYND10 | 1 |
| hsa-miR-677C NM_0013083 ZMYND10 | 1 |
| hsa-miR-6782 NM_0013083 ZMYND10 | 1 |
| hsa-miR-6789 NM_0013083 ZMYND10 | 1 |
| hsa-miR-6794 NM_0013083 ZMYND10 | 1 |
| hsa-miR-6808 NM_0013083 ZMYND10 | 1 |
| hsa-miR-6812 NM_0013083 ZMYND10 | 1 |
| hsa-miR-6813 NM_0013083 ZMYND10 | 1 |
| hsa-miR-6813 NM_0013083 ZMYND10 | 1 |
| hsa-miR-6814 NM_0013083 ZMYND10 | 1 |
| hsa-miR-6825 NM_0013083 ZMYND10 | 1 |
| hsa-miR-683C NM_0013083 ZMYND10 | 1 |
| hsa-miR-6831 NM_0013083 ZMYND10 | 1 |
| hsa-miR-6834 NM_0013083 ZMYND10 | 1 |
| hsa-miR-6843 NM_0013083 ZMYND10 | 1 |
| hsa-miR-6845 NM_0013083 ZMYND10 | 1 |
| hsa-miR-6845 NM_0013083 ZMYND10 | 1 |
| hsa-miR-6846 NM_0013083 ZMYND10 | 1 |
| hsa-miR-6847 NM_0013083 ZMYND10 | 1 |
| hsa-miR-6848 NM_0013083 ZMYND10 | 1 |
| hsa-miR-6852 NM_0013083 ZMYND10 | 1 |
| hsa-miR-6769 NM_0013083 ZMYND10 | 1 |
| hsa-miR-6878 NM_0013083 ZMYND10 | 1 |
| hsa-miR-688C NM_0013083 ZMYND10 | 1 |
| hsa-miR-6882 NM_0013083 ZMYND10 | 1 |
| hsa-miR-7106 NM_0013083 ZMYND10 | 1 |
| hsa-miR-7108 NM_0013083 ZMYND10 | 1 |
| hsa-miR-7108 NM_0013083 ZMYND10 | 1 |
| hsa-miR-715C NM_0013083 ZMYND10 | 1 |
| hsa-miR-7157 NM_0013083 ZMYND10 | 1 |
| hsa-miR-1273 NM_0013083 ZMYND10 | 1 |
| hsa-miR-7847 NM_0013083 ZMYND10 | 1 |
| hsa-miR-7847 NM_0013083 ZMYND10 | 1 |
| hsa-miR-8058 NM_0013083 ZMYND10 | 1 |
| hsa-miR-104C NM_0013083 ZMYND10 | 1 |
| hsa-miR-1211 NM_0013083 ZMYND10 | 1 |
| hsa-miR-15a- NM_015896 ZMYND10  | 1 |
| hsa-miR-25-5j NM_015896 ZMYND10 | 1 |
| hsa-miR-34a- NM_015896 ZMYND10  | 1 |
| hsa-miR-222- NM_015896 ZMYND10  | 1 |
| hsa-miR-15b- NM_015896 ZMYND10  | 1 |
| hsa-miR-23b- NM_015896 ZMYND10  | 1 |
| hsa-miR-23b- NM_015896 ZMYND10  | 1 |
| hsa-miR-193a NM_015896 ZMYND10  | 1 |
| hsa-miR-376c NM_015896 ZMYND10  | 1 |
| hsa-miR-328- NM_015896 ZMYND10  | 1 |
| hsa-miR-342- NM_015896 ZMYND10  | 1 |
| hsa-miR-485- NM_015896 ZMYND10  | 1 |
| hsa-miR-485- NM_015896 ZMYND10  | 1 |
| hsa-miR-432- NM_015896 ZMYND10  | 1 |
| hsa-miR-497- NM_015896 ZMYND10  | 1 |
| hsa-miR-518c NM_015896 ZMYND10  | 1 |
| hsa-miR-593- NM_015896 ZMYND10  | 1 |
| hsa-miR-614 NM_015896 ZMYND10   | 1 |
| hsa-miR-638 NM_015896 ZMYND10   | 1 |
| hsa-miR-662 NM_015896 ZMYND10   | 1 |
| hsa-miR-874- NM_015896 ZMYND10  | 1 |
| hsa-miR-937- NM_015896 ZMYND10  | 1 |
| hsa-miR-939- NM_015896 ZMYND10  | 1 |
| hsa-miR-1233 NM_015896 ZMYND10  | 1 |
| hsa-miR-1287 NM_015896 ZMYND10  | 1 |
| hsa-miR-1294 NM_015896 ZMYND10  | 1 |
| hsa-miR-1295 NM_015896 ZMYND10  | 1 |
| hsa-miR-1251 NM_015896 ZMYND10  | 1 |
| hsa-miR-1292 NM_015896 ZMYND10  | 1 |
| hsa-miR-1307 NM_015896 ZMYND10  | 1 |
| hsa-miR-3152 NM_015896 ZMYND10  | 1 |
| hsa-miR-3162 NM_015896 ZMYND10  | 1 |
| hsa-miR-317C NM_015896 ZMYND10  | 1 |
| hsa-miR-3173 NM_015896 ZMYND10  | 1 |
| hsa-miR-4257 NM_015896 ZMYND10  | 1 |
| hsa-miR-428C NM_015896 ZMYND10  | 1 |
| hsa-miR-3614 NM_015896 ZMYND10  | 1 |
| hsa-miR-3691 NM_015896 ZMYND10  | 1 |
| hsa-miR-3922 NM_015896 ZMYND10  | 1 |
| hsa-miR-3922 NM_015896 ZMYND10  | 1 |
| hsa-miR-4446 NM_015896 ZMYND10  | 1 |
| hsa-miR-4454 NM_015896 ZMYND10  | 1 |

|                                |            |   |
|--------------------------------|------------|---|
| hsa-miR-4463 NM_015896         | ZMYND10    | 1 |
| hsa-miR-4485 NM_015896         | ZMYND10    | 1 |
| hsa-miR-466C NM_015896         | ZMYND10    | 1 |
| hsa-miR-4687 NM_015896         | ZMYND10    | 1 |
| hsa-miR-4706 NM_015896         | ZMYND10    | 1 |
| hsa-miR-4722 NM_015896         | ZMYND10    | 1 |
| hsa-miR-4736 NM_015896         | ZMYND10    | 1 |
| hsa-miR-4756 NM_015896         | ZMYND10    | 1 |
| hsa-miR-4436 NM_015896         | ZMYND10    | 1 |
| hsa-miR-4784 NM_015896         | ZMYND10    | 1 |
| hsa-miR-4785 NM_015896         | ZMYND10    | 1 |
| hsa-miR-480C NM_015896         | ZMYND10    | 1 |
| hsa-miR-5691 NM_015896         | ZMYND10    | 1 |
| hsa-miR-6086 NM_015896         | ZMYND10    | 1 |
| hsa-miR-6125 NM_015896         | ZMYND10    | 1 |
| hsa-miR-6127 NM_015896         | ZMYND10    | 1 |
| hsa-miR-6127 NM_015896         | ZMYND10    | 1 |
| hsa-miR-6514 NM_015896         | ZMYND10    | 1 |
| hsa-miR-6728 NM_015896         | ZMYND10    | 1 |
| hsa-miR-6729 NM_015896         | ZMYND10    | 1 |
| hsa-miR-6732 NM_015896         | ZMYND10    | 1 |
| hsa-miR-6736 NM_015896         | ZMYND10    | 1 |
| hsa-miR-6751 NM_015896         | ZMYND10    | 1 |
| hsa-miR-6756 NM_015896         | ZMYND10    | 1 |
| hsa-miR-6759 NM_015896         | ZMYND10    | 1 |
| hsa-miR-6761 NM_015896         | ZMYND10    | 1 |
| hsa-miR-6764 NM_015896         | ZMYND10    | 1 |
| hsa-miR-6766 NM_015896         | ZMYND10    | 1 |
| hsa-miR-6767 NM_015896         | ZMYND10    | 1 |
| hsa-miR-677C NM_015896         | ZMYND10    | 1 |
| hsa-miR-6782 NM_015896         | ZMYND10    | 1 |
| hsa-miR-6789 NM_015896         | ZMYND10    | 1 |
| hsa-miR-6794 NM_015896         | ZMYND10    | 1 |
| hsa-miR-6808 NM_015896         | ZMYND10    | 1 |
| hsa-miR-6812 NM_015896         | ZMYND10    | 1 |
| hsa-miR-6813 NM_015896         | ZMYND10    | 1 |
| hsa-miR-6813 NM_015896         | ZMYND10    | 1 |
| hsa-miR-6814 NM_015896         | ZMYND10    | 1 |
| hsa-miR-6825 NM_015896         | ZMYND10    | 1 |
| hsa-miR-683C NM_015896         | ZMYND10    | 1 |
| hsa-miR-6831 NM_015896         | ZMYND10    | 1 |
| hsa-miR-6834 NM_015896         | ZMYND10    | 1 |
| hsa-miR-6843 NM_015896         | ZMYND10    | 1 |
| hsa-miR-6845 NM_015896         | ZMYND10    | 1 |
| hsa-miR-6845 NM_015896         | ZMYND10    | 1 |
| hsa-miR-6846 NM_015896         | ZMYND10    | 1 |
| hsa-miR-6847 NM_015896         | ZMYND10    | 1 |
| hsa-miR-6848 NM_015896         | ZMYND10    | 1 |
| hsa-miR-6852 NM_015896         | ZMYND10    | 1 |
| hsa-miR-6769 NM_015896         | ZMYND10    | 1 |
| hsa-miR-6878 NM_015896         | ZMYND10    | 1 |
| hsa-miR-688C NM_015896         | ZMYND10    | 1 |
| hsa-miR-6882 NM_015896         | ZMYND10    | 1 |
| hsa-miR-7106 NM_015896         | ZMYND10    | 1 |
| hsa-miR-7108 NM_015896         | ZMYND10    | 1 |
| hsa-miR-7108 NM_015896         | ZMYND10    | 1 |
| hsa-miR-715C NM_015896         | ZMYND10    | 1 |
| hsa-miR-7157 NM_015896         | ZMYND10    | 1 |
| hsa-miR-1273 NM_015896         | ZMYND10    | 1 |
| hsa-miR-7847 NM_015896         | ZMYND10    | 1 |
| hsa-miR-7847 NM_015896         | ZMYND10    | 1 |
| hsa-miR-8058 NM_015896         | ZMYND10    | 1 |
| hsa-miR-104C NM_015896         | ZMYND10    | 1 |
| hsa-miR-1211 NM_015896         | ZMYND10    | 1 |
| hsa-miR-1207 NM_0013163 BCAS1  | 0.95384615 |   |
| hsa-miR-1207 NM_003657 BCAS1   | 0.95384615 |   |
| hsa-let-7g-3p NM_0013163 BCAS1 | 0.96153846 |   |
| hsa-miR-125a NM_0013163 BCAS1  | 0.96153846 |   |
| hsa-miR-489- NM_0013163 BCAS1  | 0.96153846 |   |
| hsa-miR-554 NM_0013163 BCAS1   | 0.96153846 |   |
| hsa-miR-642a NM_0013163 BCAS1  | 0.96153846 |   |
| hsa-miR-3677 NM_0013163 BCAS1  | 0.96153846 |   |
| hsa-miR-4494 NM_0013163 BCAS1  | 0.96153846 |   |
| hsa-miR-3529 NM_0013163 BCAS1  | 0.96153846 |   |
| hsa-miR-5009 NM_0013163 BCAS1  | 0.96153846 |   |
| hsa-miR-6887 NM_0013163 BCAS1  | 0.96153846 |   |
| hsa-miR-689C NM_0013163 BCAS1  | 0.96153846 |   |
| hsa-let-7g-3p NM_003657 BCAS1  | 0.96153846 |   |
| hsa-miR-125a NM_003657 BCAS1   | 0.96153846 |   |
| hsa-miR-489- NM_003657 BCAS1   | 0.96153846 |   |
| hsa-miR-554 NM_003657 BCAS1    | 0.96153846 |   |
| hsa-miR-642a NM_003657 BCAS1   | 0.96153846 |   |
| hsa-miR-3677 NM_003657 BCAS1   | 0.96153846 |   |
| hsa-miR-4494 NM_003657 BCAS1   | 0.96153846 |   |
| hsa-miR-3529 NM_003657 BCAS1   | 0.96153846 |   |
| hsa-miR-5009 NM_003657 BCAS1   | 0.96153846 |   |
| hsa-miR-6887 NM_003657 BCAS1   | 0.96153846 |   |
| hsa-miR-689C NM_003657 BCAS1   | 0.96153846 |   |
| hsa-miR-6784 NM_0013163 BCAS1  | 0.96923077 |   |
| hsa-miR-6784 NM_003657 BCAS1   | 0.96923077 |   |
| hsa-miR-571 NM_0013163 BCAS1   | 0.97435897 |   |
| hsa-miR-4761 NM_0013163 BCAS1  | 0.97435897 |   |
| hsa-miR-5685 NM_0013163 BCAS1  | 0.97435897 |   |
| hsa-miR-571 NM_003657 BCAS1    | 0.97435897 |   |

|                                |            |
|--------------------------------|------------|
| hsa-miR-4761 NM_003657 BCAS1   | 0.97435897 |
| hsa-miR-5685 NM_003657 BCAS1   | 0.97435897 |
| hsa-miR-645 NM_0013163 BCAS1   | 0.97435897 |
| hsa-miR-6821 NM_0013163 BCAS1  | 0.97435897 |
| hsa-miR-645 NM_003657 BCAS1    | 0.97435897 |
| hsa-miR-6821 NM_003657 BCAS1   | 0.97435897 |
| hsa-miR-483- NM_0013163 BCAS1  | 0.98076923 |
| hsa-miR-483- NM_003657 BCAS1   | 0.98076923 |
| hsa-miR-23a- NM_0013163 BCAS1  | 1          |
| hsa-miR-24-1- NM_0013163 BCAS1 | 1          |
| hsa-miR-24-2- NM_0013163 BCAS1 | 1          |
| hsa-miR-28-3j NM_0013163 BCAS1 | 1          |
| hsa-miR-92a- NM_0013163 BCAS1  | 1          |
| hsa-miR-92a- NM_0013163 BCAS1  | 1          |
| hsa-miR-196a NM_0013163 BCAS1  | 1          |
| hsa-miR-197- NM_0013163 BCAS1  | 1          |
| hsa-miR-208a NM_0013163 BCAS1  | 1          |
| hsa-miR-129- NM_0013163 BCAS1  | 1          |
| hsa-miR-129- NM_0013163 BCAS1  | 1          |
| hsa-miR-187- NM_0013163 BCAS1  | 1          |
| hsa-miR-187- NM_0013163 BCAS1  | 1          |
| hsa-miR-210- NM_0013163 BCAS1  | 1          |
| hsa-miR-200b NM_0013163 BCAS1  | 1          |
| hsa-miR-23b- NM_0013163 BCAS1  | 1          |
| hsa-miR-122- NM_0013163 BCAS1  | 1          |
| hsa-miR-129- NM_0013163 BCAS1  | 1          |
| hsa-miR-106b NM_0013163 BCAS1  | 1          |
| hsa-miR-34b- NM_0013163 BCAS1  | 1          |
| hsa-miR-373- NM_0013163 BCAS1  | 1          |
| hsa-miR-375- NM_0013163 BCAS1  | 1          |
| hsa-miR-379- NM_0013163 BCAS1  | 1          |
| hsa-miR-326 NM_0013163 BCAS1   | 1          |
| hsa-miR-148b NM_0013163 BCAS1  | 1          |
| hsa-miR-324- NM_0013163 BCAS1  | 1          |
| hsa-miR-339- NM_0013163 BCAS1  | 1          |
| hsa-miR-346 NM_0013163 BCAS1   | 1          |
| hsa-miR-422a NM_0013163 BCAS1  | 1          |
| hsa-miR-20b- NM_0013163 BCAS1  | 1          |
| hsa-miR-431- NM_0013163 BCAS1  | 1          |
| hsa-miR-433- NM_0013163 BCAS1  | 1          |
| hsa-miR-412- NM_0013163 BCAS1  | 1          |
| hsa-miR-512- NM_0013163 BCAS1  | 1          |
| hsa-miR-520a NM_0013163 BCAS1  | 1          |
| hsa-miR-526a NM_0013163 BCAS1  | 1          |
| hsa-miR-518e NM_0013163 BCAS1  | 1          |
| hsa-miR-518d NM_0013163 BCAS1  | 1          |
| hsa-miR-450a NM_0013163 BCAS1  | 1          |
| hsa-miR-539- NM_0013163 BCAS1  | 1          |
| hsa-miR-552- NM_0013163 BCAS1  | 1          |
| hsa-miR-92b- NM_0013163 BCAS1  | 1          |
| hsa-miR-92b- NM_0013163 BCAS1  | 1          |
| hsa-miR-555 NM_0013163 BCAS1   | 1          |
| hsa-miR-558 NM_0013163 BCAS1   | 1          |
| hsa-miR-574- NM_0013163 BCAS1  | 1          |
| hsa-miR-585- NM_0013163 BCAS1  | 1          |
| hsa-miR-588 NM_0013163 BCAS1   | 1          |
| hsa-miR-593- NM_0013163 BCAS1  | 1          |
| hsa-miR-605- NM_0013163 BCAS1  | 1          |
| hsa-miR-611 NM_0013163 BCAS1   | 1          |
| hsa-miR-615- NM_0013163 BCAS1  | 1          |
| hsa-miR-640 NM_0013163 BCAS1   | 1          |
| hsa-miR-641 NM_0013163 BCAS1   | 1          |
| hsa-miR-642a NM_0013163 BCAS1  | 1          |
| hsa-miR-648 NM_0013163 BCAS1   | 1          |
| hsa-miR-650 NM_0013163 BCAS1   | 1          |
| hsa-miR-663a NM_0013163 BCAS1  | 1          |
| hsa-miR-411- NM_0013163 BCAS1  | 1          |
| hsa-miR-654- NM_0013163 BCAS1  | 1          |
| hsa-miR-657 NM_0013163 BCAS1   | 1          |
| hsa-miR-758- NM_0013163 BCAS1  | 1          |
| hsa-miR-1296 NM_0013163 BCAS1  | 1          |
| hsa-miR-1271 NM_0013163 BCAS1  | 1          |
| hsa-miR-766- NM_0013163 BCAS1  | 1          |
| hsa-miR-670- NM_0013163 BCAS1  | 1          |
| hsa-miR-765 NM_0013163 BCAS1   | 1          |
| hsa-miR-874- NM_0013163 BCAS1  | 1          |
| hsa-miR-885- NM_0013163 BCAS1  | 1          |
| hsa-miR-877- NM_0013163 BCAS1  | 1          |
| hsa-miR-877- NM_0013163 BCAS1  | 1          |
| hsa-miR-935 NM_0013163 BCAS1   | 1          |
| hsa-miR-943 NM_0013163 BCAS1   | 1          |
| hsa-miR-1178 NM_0013163 BCAS1  | 1          |
| hsa-miR-1228 NM_0013163 BCAS1  | 1          |
| hsa-miR-1229 NM_0013163 BCAS1  | 1          |
| hsa-miR-1229 NM_0013163 BCAS1  | 1          |
| hsa-miR-1233 NM_0013163 BCAS1  | 1          |
| hsa-miR-1200 NM_0013163 BCAS1  | 1          |
| hsa-miR-1285 NM_0013163 BCAS1  | 1          |
| hsa-miR-1291 NM_0013163 BCAS1  | 1          |
| hsa-miR-1248 NM_0013163 BCAS1  | 1          |
| hsa-miR-1249 NM_0013163 BCAS1  | 1          |
| hsa-miR-1292 NM_0013163 BCAS1  | 1          |
| hsa-miR-1470 NM_0013163 BCAS1  | 1          |
| hsa-miR-1825 NM_0013163 BCAS1  | 1          |





|                                |   |
|--------------------------------|---|
| hsa-miR-6833 NM_0013163 BCAS1  | 1 |
| hsa-miR-6780 NM_0013163 BCAS1  | 1 |
| hsa-miR-6836 NM_0013163 BCAS1  | 1 |
| hsa-miR-6835 NM_0013163 BCAS1  | 1 |
| hsa-miR-6835 NM_0013163 BCAS1  | 1 |
| hsa-miR-6846 NM_0013163 BCAS1  | 1 |
| hsa-miR-6847 NM_0013163 BCAS1  | 1 |
| hsa-miR-6848 NM_0013163 BCAS1  | 1 |
| hsa-miR-6856 NM_0013163 BCAS1  | 1 |
| hsa-miR-6858 NM_0013163 BCAS1  | 1 |
| hsa-miR-6862 NM_0013163 BCAS1  | 1 |
| hsa-miR-6864 NM_0013163 BCAS1  | 1 |
| hsa-miR-6865 NM_0013163 BCAS1  | 1 |
| hsa-miR-6866 NM_0013163 BCAS1  | 1 |
| hsa-miR-6865 NM_0013163 BCAS1  | 1 |
| hsa-miR-6865 NM_0013163 BCAS1  | 1 |
| hsa-miR-6865 NM_0013163 BCAS1  | 1 |
| hsa-miR-687C NM_0013163 BCAS1  | 1 |
| hsa-miR-687C NM_0013163 BCAS1  | 1 |
| hsa-miR-6871 NM_0013163 BCAS1  | 1 |
| hsa-miR-6872 NM_0013163 BCAS1  | 1 |
| hsa-miR-6873 NM_0013163 BCAS1  | 1 |
| hsa-miR-6873 NM_0013163 BCAS1  | 1 |
| hsa-miR-6874 NM_0013163 BCAS1  | 1 |
| hsa-miR-6875 NM_0013163 BCAS1  | 1 |
| hsa-miR-6877 NM_0013163 BCAS1  | 1 |
| hsa-miR-6881 NM_0013163 BCAS1  | 1 |
| hsa-miR-6883 NM_0013163 BCAS1  | 1 |
| hsa-miR-6884 NM_0013163 BCAS1  | 1 |
| hsa-miR-6886 NM_0013163 BCAS1  | 1 |
| hsa-miR-6887 NM_0013163 BCAS1  | 1 |
| hsa-miR-6885 NM_0013163 BCAS1  | 1 |
| hsa-miR-6885 NM_0013163 BCAS1  | 1 |
| hsa-miR-689C NM_0013163 BCAS1  | 1 |
| hsa-miR-6892 NM_0013163 BCAS1  | 1 |
| hsa-miR-6893 NM_0013163 BCAS1  | 1 |
| hsa-miR-7106 NM_0013163 BCAS1  | 1 |
| hsa-miR-7108 NM_0013163 BCAS1  | 1 |
| hsa-miR-7108 NM_0013163 BCAS1  | 1 |
| hsa-miR-7108 NM_0013163 BCAS1  | 1 |
| hsa-miR-711C NM_0013163 BCAS1  | 1 |
| hsa-miR-7111 NM_0013163 BCAS1  | 1 |
| hsa-miR-7112 NM_0013163 BCAS1  | 1 |
| hsa-miR-7151 NM_0013163 BCAS1  | 1 |
| hsa-miR-7152 NM_0013163 BCAS1  | 1 |
| hsa-miR-7153 NM_0013163 BCAS1  | 1 |
| hsa-miR-7156 NM_0013163 BCAS1  | 1 |
| hsa-miR-7158 NM_0013163 BCAS1  | 1 |
| hsa-miR-7158 NM_0013163 BCAS1  | 1 |
| hsa-miR-7162 NM_0013163 BCAS1  | 1 |
| hsa-miR-7706 NM_0013163 BCAS1  | 1 |
| hsa-miR-7843 NM_0013163 BCAS1  | 1 |
| hsa-miR-4433 NM_0013163 BCAS1  | 1 |
| hsa-miR-4433 NM_0013163 BCAS1  | 1 |
| hsa-miR-7846 NM_0013163 BCAS1  | 1 |
| hsa-miR-7855 NM_0013163 BCAS1  | 1 |
| hsa-miR-7976 NM_0013163 BCAS1  | 1 |
| hsa-miR-8076 NM_0013163 BCAS1  | 1 |
| hsa-miR-8085 NM_0013163 BCAS1  | 1 |
| hsa-miR-950C NM_0013163 BCAS1  | 1 |
| hsa-miR-9901 NM_0013163 BCAS1  | 1 |
| hsa-miR-1039 NM_0013163 BCAS1  | 1 |
| hsa-miR-104C NM_0013163 BCAS1  | 1 |
| hsa-miR-104C NM_0013163 BCAS1  | 1 |
| hsa-miR-1052 NM_0013163 BCAS1  | 1 |
| hsa-miR-1118 NM_0013163 BCAS1  | 1 |
| hsa-miR-114C NM_0013163 BCAS1  | 1 |
| hsa-miR-3085 NM_0013163 BCAS1  | 1 |
| hsa-miR-1211 NM_0013163 BCAS1  | 1 |
| hsa-miR-1213 NM_0013163 BCAS1  | 1 |
| hsa-miR-23a- NM_003657 BCAS1   | 1 |
| hsa-miR-24-1- NM_003657 BCAS1  | 1 |
| hsa-miR-24-2- NM_003657 BCAS1  | 1 |
| hsa-miR-28-3j- NM_003657 BCAS1 | 1 |
| hsa-miR-92a- NM_003657 BCAS1   | 1 |
| hsa-miR-92a- NM_003657 BCAS1   | 1 |
| hsa-miR-196a NM_003657 BCAS1   | 1 |
| hsa-miR-197- NM_003657 BCAS1   | 1 |
| hsa-miR-208a NM_003657 BCAS1   | 1 |
| hsa-miR-129- NM_003657 BCAS1   | 1 |
| hsa-miR-129- NM_003657 BCAS1   | 1 |
| hsa-miR-187- NM_003657 BCAS1   | 1 |
| hsa-miR-187- NM_003657 BCAS1   | 1 |
| hsa-miR-210- NM_003657 BCAS1   | 1 |
| hsa-miR-200b NM_003657 BCAS1   | 1 |
| hsa-miR-23b- NM_003657 BCAS1   | 1 |
| hsa-miR-122- NM_003657 BCAS1   | 1 |
| hsa-miR-129- NM_003657 BCAS1   | 1 |
| hsa-miR-106b NM_003657 BCAS1   | 1 |
| hsa-miR-34b- NM_003657 BCAS1   | 1 |
| hsa-miR-373- NM_003657 BCAS1   | 1 |
| hsa-miR-375- NM_003657 BCAS1   | 1 |
| hsa-miR-379- NM_003657 BCAS1   | 1 |
| hsa-miR-326 NM_003657 BCAS1    | 1 |
| hsa-miR-148b NM_003657 BCAS1   | 1 |
| hsa-miR-324- NM_003657 BCAS1   | 1 |

|              |           |       |   |
|--------------|-----------|-------|---|
| hsa-miR-339- | NM_003657 | BCAS1 | 1 |
| hsa-miR-346  | NM_003657 | BCAS1 | 1 |
| hsa-miR-422a | NM_003657 | BCAS1 | 1 |
| hsa-miR-20b- | NM_003657 | BCAS1 | 1 |
| hsa-miR-431- | NM_003657 | BCAS1 | 1 |
| hsa-miR-433- | NM_003657 | BCAS1 | 1 |
| hsa-miR-412- | NM_003657 | BCAS1 | 1 |
| hsa-miR-512- | NM_003657 | BCAS1 | 1 |
| hsa-miR-520e | NM_003657 | BCAS1 | 1 |
| hsa-miR-526a | NM_003657 | BCAS1 | 1 |
| hsa-miR-518e | NM_003657 | BCAS1 | 1 |
| hsa-miR-518d | NM_003657 | BCAS1 | 1 |
| hsa-miR-450a | NM_003657 | BCAS1 | 1 |
| hsa-miR-539- | NM_003657 | BCAS1 | 1 |
| hsa-miR-552- | NM_003657 | BCAS1 | 1 |
| hsa-miR-92b- | NM_003657 | BCAS1 | 1 |
| hsa-miR-92b- | NM_003657 | BCAS1 | 1 |
| hsa-miR-555  | NM_003657 | BCAS1 | 1 |
| hsa-miR-558  | NM_003657 | BCAS1 | 1 |
| hsa-miR-574- | NM_003657 | BCAS1 | 1 |
| hsa-miR-585- | NM_003657 | BCAS1 | 1 |
| hsa-miR-588  | NM_003657 | BCAS1 | 1 |
| hsa-miR-593- | NM_003657 | BCAS1 | 1 |
| hsa-miR-605- | NM_003657 | BCAS1 | 1 |
| hsa-miR-611  | NM_003657 | BCAS1 | 1 |
| hsa-miR-615- | NM_003657 | BCAS1 | 1 |
| hsa-miR-640  | NM_003657 | BCAS1 | 1 |
| hsa-miR-641  | NM_003657 | BCAS1 | 1 |
| hsa-miR-642a | NM_003657 | BCAS1 | 1 |
| hsa-miR-650  | NM_003657 | BCAS1 | 1 |
| hsa-miR-663a | NM_003657 | BCAS1 | 1 |
| hsa-miR-411- | NM_003657 | BCAS1 | 1 |
| hsa-miR-654- | NM_003657 | BCAS1 | 1 |
| hsa-miR-657  | NM_003657 | BCAS1 | 1 |
| hsa-miR-758- | NM_003657 | BCAS1 | 1 |
| hsa-miR-1296 | NM_003657 | BCAS1 | 1 |
| hsa-miR-1271 | NM_003657 | BCAS1 | 1 |
| hsa-miR-766- | NM_003657 | BCAS1 | 1 |
| hsa-miR-670- | NM_003657 | BCAS1 | 1 |
| hsa-miR-765  | NM_003657 | BCAS1 | 1 |
| hsa-miR-874- | NM_003657 | BCAS1 | 1 |
| hsa-miR-885- | NM_003657 | BCAS1 | 1 |
| hsa-miR-877- | NM_003657 | BCAS1 | 1 |
| hsa-miR-935  | NM_003657 | BCAS1 | 1 |
| hsa-miR-943  | NM_003657 | BCAS1 | 1 |
| hsa-miR-1178 | NM_003657 | BCAS1 | 1 |
| hsa-miR-1228 | NM_003657 | BCAS1 | 1 |
| hsa-miR-1229 | NM_003657 | BCAS1 | 1 |
| hsa-miR-1229 | NM_003657 | BCAS1 | 1 |
| hsa-miR-1229 | NM_003657 | BCAS1 | 1 |
| hsa-miR-1233 | NM_003657 | BCAS1 | 1 |
| hsa-miR-1236 | NM_003657 | BCAS1 | 1 |
| hsa-miR-120C | NM_003657 | BCAS1 | 1 |
| hsa-miR-1285 | NM_003657 | BCAS1 | 1 |
| hsa-miR-1291 | NM_003657 | BCAS1 | 1 |
| hsa-miR-1248 | NM_003657 | BCAS1 | 1 |
| hsa-miR-1249 | NM_003657 | BCAS1 | 1 |
| hsa-miR-1292 | NM_003657 | BCAS1 | 1 |
| hsa-miR-147C | NM_003657 | BCAS1 | 1 |
| hsa-miR-1825 | NM_003657 | BCAS1 | 1 |
| hsa-miR-1909 | NM_003657 | BCAS1 | 1 |
| hsa-miR-191C | NM_003657 | BCAS1 | 1 |
| hsa-miR-1972 | NM_003657 | BCAS1 | 1 |
| hsa-miR-2277 | NM_003657 | BCAS1 | 1 |
| hsa-miR-2278 | NM_003657 | BCAS1 | 1 |
| hsa-miR-2681 | NM_003657 | BCAS1 | 1 |
| hsa-miR-3124 | NM_003657 | BCAS1 | 1 |
| hsa-miR-3127 | NM_003657 | BCAS1 | 1 |
| hsa-miR-3131 | NM_003657 | BCAS1 | 1 |
| hsa-miR-3135 | NM_003657 | BCAS1 | 1 |
| hsa-miR-544t | NM_003657 | BCAS1 | 1 |
| hsa-miR-3137 | NM_003657 | BCAS1 | 1 |
| hsa-miR-3141 | NM_003657 | BCAS1 | 1 |
| hsa-miR-3144 | NM_003657 | BCAS1 | 1 |
| hsa-miR-3144 | NM_003657 | BCAS1 | 1 |
| hsa-miR-3152 | NM_003657 | BCAS1 | 1 |
| hsa-miR-3157 | NM_003657 | BCAS1 | 1 |
| hsa-miR-3162 | NM_003657 | BCAS1 | 1 |
| hsa-miR-1193 | NM_003657 | BCAS1 | 1 |
| hsa-miR-3175 | NM_003657 | BCAS1 | 1 |
| hsa-miR-3176 | NM_003657 | BCAS1 | 1 |
| hsa-miR-3181 | NM_003657 | BCAS1 | 1 |
| hsa-miR-319C | NM_003657 | BCAS1 | 1 |
| hsa-miR-319C | NM_003657 | BCAS1 | 1 |
| hsa-miR-3191 | NM_003657 | BCAS1 | 1 |
| hsa-miR-3191 | NM_003657 | BCAS1 | 1 |
| hsa-miR-4296 | NM_003657 | BCAS1 | 1 |
| hsa-miR-4299 | NM_003657 | BCAS1 | 1 |
| hsa-miR-4298 | NM_003657 | BCAS1 | 1 |
| hsa-miR-4316 | NM_003657 | BCAS1 | 1 |
| hsa-miR-4321 | NM_003657 | BCAS1 | 1 |
| hsa-miR-4257 | NM_003657 | BCAS1 | 1 |
| hsa-miR-4258 | NM_003657 | BCAS1 | 1 |
| hsa-miR-426C | NM_003657 | BCAS1 | 1 |



|                        |       |   |
|------------------------|-------|---|
| hsa-miR-4252 NM_003657 | BCAS1 | 1 |
| hsa-miR-4326 NM_003657 | BCAS1 | 1 |
| hsa-miR-4326 NM_003657 | BCAS1 | 1 |
| hsa-miR-4285 NM_003657 | BCAS1 | 1 |
| hsa-miR-4287 NM_003657 | BCAS1 | 1 |
| hsa-miR-4290 NM_003657 | BCAS1 | 1 |
| hsa-miR-4330 NM_003657 | BCAS1 | 1 |
| hsa-miR-3612 NM_003657 | BCAS1 | 1 |
| hsa-miR-3646 NM_003657 | BCAS1 | 1 |
| hsa-miR-3651 NM_003657 | BCAS1 | 1 |
| hsa-miR-3663 NM_003657 | BCAS1 | 1 |
| hsa-miR-3667 NM_003657 | BCAS1 | 1 |
| hsa-miR-3679 NM_003657 | BCAS1 | 1 |
| hsa-miR-3682 NM_003657 | BCAS1 | 1 |
| hsa-miR-3685 NM_003657 | BCAS1 | 1 |
| hsa-miR-3688 NM_003657 | BCAS1 | 1 |
| hsa-miR-3917 NM_003657 | BCAS1 | 1 |
| hsa-miR-3150 NM_003657 | BCAS1 | 1 |
| hsa-miR-4420 NM_003657 | BCAS1 | 1 |
| hsa-miR-4425 NM_003657 | BCAS1 | 1 |
| hsa-miR-4428 NM_003657 | BCAS1 | 1 |
| hsa-miR-4428 NM_003657 | BCAS1 | 1 |
| hsa-miR-4429 NM_003657 | BCAS1 | 1 |
| hsa-miR-4433 NM_003657 | BCAS1 | 1 |
| hsa-miR-4439 NM_003657 | BCAS1 | 1 |
| hsa-miR-4443 NM_003657 | BCAS1 | 1 |
| hsa-miR-4446 NM_003657 | BCAS1 | 1 |
| hsa-miR-378h NM_003657 | BCAS1 | 1 |
| hsa-miR-4466 NM_003657 | BCAS1 | 1 |
| hsa-miR-4476 NM_003657 | BCAS1 | 1 |
| hsa-miR-4488 NM_003657 | BCAS1 | 1 |
| hsa-miR-4505 NM_003657 | BCAS1 | 1 |
| hsa-miR-4515 NM_003657 | BCAS1 | 1 |
| hsa-miR-4522 NM_003657 | BCAS1 | 1 |
| hsa-miR-4526 NM_003657 | BCAS1 | 1 |
| hsa-miR-4529 NM_003657 | BCAS1 | 1 |
| hsa-miR-4535 NM_003657 | BCAS1 | 1 |
| hsa-miR-4538 NM_003657 | BCAS1 | 1 |
| hsa-miR-4633 NM_003657 | BCAS1 | 1 |
| hsa-miR-4647 NM_003657 | BCAS1 | 1 |
| hsa-miR-4649 NM_003657 | BCAS1 | 1 |
| hsa-miR-4651 NM_003657 | BCAS1 | 1 |
| hsa-miR-4667 NM_003657 | BCAS1 | 1 |
| hsa-miR-4685 NM_003657 | BCAS1 | 1 |
| hsa-miR-4685 NM_003657 | BCAS1 | 1 |
| hsa-miR-4687 NM_003657 | BCAS1 | 1 |
| hsa-miR-4689 NM_003657 | BCAS1 | 1 |
| hsa-miR-4689 NM_003657 | BCAS1 | 1 |
| hsa-miR-4695 NM_003657 | BCAS1 | 1 |
| hsa-miR-4707 NM_003657 | BCAS1 | 1 |
| hsa-miR-4707 NM_003657 | BCAS1 | 1 |
| hsa-miR-4709 NM_003657 | BCAS1 | 1 |
| hsa-miR-4715 NM_003657 | BCAS1 | 1 |
| hsa-miR-4717 NM_003657 | BCAS1 | 1 |
| hsa-miR-4724 NM_003657 | BCAS1 | 1 |
| hsa-miR-4726 NM_003657 | BCAS1 | 1 |
| hsa-miR-4728 NM_003657 | BCAS1 | 1 |
| hsa-miR-4737 NM_003657 | BCAS1 | 1 |
| hsa-miR-4742 NM_003657 | BCAS1 | 1 |
| hsa-miR-4743 NM_003657 | BCAS1 | 1 |
| hsa-miR-4745 NM_003657 | BCAS1 | 1 |
| hsa-miR-4747 NM_003657 | BCAS1 | 1 |
| hsa-miR-4748 NM_003657 | BCAS1 | 1 |
| hsa-miR-4748 NM_003657 | BCAS1 | 1 |
| hsa-miR-499b NM_003657 | BCAS1 | 1 |
| hsa-miR-4757 NM_003657 | BCAS1 | 1 |
| hsa-miR-4763 NM_003657 | BCAS1 | 1 |
| hsa-miR-4767 NM_003657 | BCAS1 | 1 |
| hsa-miR-4780 NM_003657 | BCAS1 | 1 |
| hsa-miR-4783 NM_003657 | BCAS1 | 1 |
| hsa-miR-4786 NM_003657 | BCAS1 | 1 |
| hsa-miR-4786 NM_003657 | BCAS1 | 1 |
| hsa-miR-5010 NM_003657 | BCAS1 | 1 |
| hsa-miR-5010 NM_003657 | BCAS1 | 1 |
| hsa-miR-5010 NM_003657 | BCAS1 | 1 |
| hsa-miR-5087 NM_003657 | BCAS1 | 1 |
| hsa-miR-5089 NM_003657 | BCAS1 | 1 |
| hsa-miR-5189 NM_003657 | BCAS1 | 1 |
| hsa-miR-5196 NM_003657 | BCAS1 | 1 |
| hsa-miR-5197 NM_003657 | BCAS1 | 1 |
| hsa-miR-5100 NM_003657 | BCAS1 | 1 |
| hsa-miR-664b NM_003657 | BCAS1 | 1 |
| hsa-miR-1295 NM_003657 | BCAS1 | 1 |
| hsa-miR-5681 NM_003657 | BCAS1 | 1 |
| hsa-miR-5708 NM_003657 | BCAS1 | 1 |
| hsa-miR-5708 NM_003657 | BCAS1 | 1 |
| hsa-miR-6086 NM_003657 | BCAS1 | 1 |
| hsa-miR-6133 NM_003657 | BCAS1 | 1 |
| hsa-miR-6134 NM_003657 | BCAS1 | 1 |
| hsa-miR-6499 NM_003657 | BCAS1 | 1 |
| hsa-miR-6500 NM_003657 | BCAS1 | 1 |
| hsa-miR-6500 NM_003657 | BCAS1 | 1 |
| hsa-miR-6504 NM_003657 | BCAS1 | 1 |
| hsa-miR-6507 NM_003657 | BCAS1 | 1 |



|                            |       |            |
|----------------------------|-------|------------|
| hsa-miR-7108 NM_003657     | BCAS1 | 1          |
| hsa-miR-7108 NM_003657     | BCAS1 | 1          |
| hsa-miR-7110 NM_003657     | BCAS1 | 1          |
| hsa-miR-7111 NM_003657     | BCAS1 | 1          |
| hsa-miR-7112 NM_003657     | BCAS1 | 1          |
| hsa-miR-7151 NM_003657     | BCAS1 | 1          |
| hsa-miR-7152 NM_003657     | BCAS1 | 1          |
| hsa-miR-7153 NM_003657     | BCAS1 | 1          |
| hsa-miR-7154 NM_003657     | BCAS1 | 1          |
| hsa-miR-7156 NM_003657     | BCAS1 | 1          |
| hsa-miR-7158 NM_003657     | BCAS1 | 1          |
| hsa-miR-7158 NM_003657     | BCAS1 | 1          |
| hsa-miR-7162 NM_003657     | BCAS1 | 1          |
| hsa-miR-7706 NM_003657     | BCAS1 | 1          |
| hsa-miR-7843 NM_003657     | BCAS1 | 1          |
| hsa-miR-4433 NM_003657     | BCAS1 | 1          |
| hsa-miR-4433 NM_003657     | BCAS1 | 1          |
| hsa-miR-7846 NM_003657     | BCAS1 | 1          |
| hsa-miR-7855 NM_003657     | BCAS1 | 1          |
| hsa-miR-7976 NM_003657     | BCAS1 | 1          |
| hsa-miR-8076 NM_003657     | BCAS1 | 1          |
| hsa-miR-8085 NM_003657     | BCAS1 | 1          |
| hsa-miR-950C NM_003657     | BCAS1 | 1          |
| hsa-miR-9901 NM_003657     | BCAS1 | 1          |
| hsa-miR-1039 NM_003657     | BCAS1 | 1          |
| hsa-miR-104C NM_003657     | BCAS1 | 1          |
| hsa-miR-104C NM_003657     | BCAS1 | 1          |
| hsa-miR-1052 NM_003657     | BCAS1 | 1          |
| hsa-miR-1118 NM_003657     | BCAS1 | 1          |
| hsa-miR-114C NM_003657     | BCAS1 | 1          |
| hsa-miR-3085 NM_003657     | BCAS1 | 1          |
| hsa-miR-1211 NM_003657     | BCAS1 | 1          |
| hsa-miR-1213 NM_003657     | BCAS1 | 1          |
| hsa-miR-480C NM_0013172    | CXXC5 | 0.95384615 |
| hsa-miR-480C NM_016463     | CXXC5 | 0.95384615 |
| hsa-miR-494- NM_0013172    | CXXC5 | 0.96153846 |
| hsa-miR-2117 NM_0013172    | CXXC5 | 0.96153846 |
| hsa-miR-494- NM_016463     | CXXC5 | 0.96153846 |
| hsa-miR-2117 NM_016463     | CXXC5 | 0.96153846 |
| hsa-miR-210- NM_0013172    | CXXC5 | 0.97435897 |
| hsa-miR-4469 NM_0013172    | CXXC5 | 0.97435897 |
| hsa-miR-210- NM_016463     | CXXC5 | 0.97435897 |
| hsa-let-7f-2-3j NM_0013172 | CXXC5 | 1          |
| hsa-miR-18a- NM_0013172    | CXXC5 | 1          |
| hsa-miR-23a- NM_0013172    | CXXC5 | 1          |
| hsa-miR-25-5j NM_0013172   | CXXC5 | 1          |
| hsa-miR-29b- NM_0013172    | CXXC5 | 1          |
| hsa-miR-29b- NM_0013172    | CXXC5 | 1          |
| hsa-miR-215- NM_0013172    | CXXC5 | 1          |
| hsa-miR-191- NM_0013172    | CXXC5 | 1          |
| hsa-miR-125a NM_0013172    | CXXC5 | 1          |
| hsa-miR-30c- NM_0013172    | CXXC5 | 1          |
| hsa-miR-296- NM_0013172    | CXXC5 | 1          |
| hsa-miR-381- NM_0013172    | CXXC5 | 1          |
| hsa-miR-382- NM_0013172    | CXXC5 | 1          |
| hsa-miR-328- NM_0013172    | CXXC5 | 1          |
| hsa-miR-342- NM_0013172    | CXXC5 | 1          |
| hsa-miR-433- NM_0013172    | CXXC5 | 1          |
| hsa-miR-483- NM_0013172    | CXXC5 | 1          |
| hsa-miR-483- NM_0013172    | CXXC5 | 1          |
| hsa-miR-486- NM_0013172    | CXXC5 | 1          |
| hsa-miR-490- NM_0013172    | CXXC5 | 1          |
| hsa-miR-181d NM_0013172    | CXXC5 | 1          |
| hsa-miR-520e NM_0013172    | CXXC5 | 1          |
| hsa-miR-520d NM_0013172    | CXXC5 | 1          |
| hsa-miR-518a NM_0013172    | CXXC5 | 1          |
| hsa-miR-527 NM_0013172     | CXXC5 | 1          |
| hsa-miR-516a NM_0013172    | CXXC5 | 1          |
| hsa-miR-505- NM_0013172    | CXXC5 | 1          |
| hsa-miR-567 NM_0013172     | CXXC5 | 1          |
| hsa-miR-595 NM_0013172     | CXXC5 | 1          |
| hsa-miR-612 NM_0013172     | CXXC5 | 1          |
| hsa-miR-615- NM_0013172    | CXXC5 | 1          |
| hsa-miR-623 NM_0013172     | CXXC5 | 1          |
| hsa-miR-625- NM_0013172    | CXXC5 | 1          |
| hsa-miR-642a NM_0013172    | CXXC5 | 1          |
| hsa-miR-216b NM_0013172    | CXXC5 | 1          |
| hsa-miR-922 NM_0013172     | CXXC5 | 1          |
| hsa-miR-939- NM_0013172    | CXXC5 | 1          |
| hsa-miR-1236 NM_0013172    | CXXC5 | 1          |
| hsa-miR-1207 NM_0013172    | CXXC5 | 1          |
| hsa-miR-1207 NM_0013172    | CXXC5 | 1          |
| hsa-miR-1244 NM_0013172    | CXXC5 | 1          |
| hsa-miR-1252 NM_0013172    | CXXC5 | 1          |
| hsa-miR-513c NM_0013172    | CXXC5 | 1          |
| hsa-miR-1911 NM_0013172    | CXXC5 | 1          |
| hsa-miR-1912 NM_0013172    | CXXC5 | 1          |
| hsa-miR-1973 NM_0013172    | CXXC5 | 1          |
| hsa-miR-3135 NM_0013172    | CXXC5 | 1          |
| hsa-miR-3144 NM_0013172    | CXXC5 | 1          |
| hsa-miR-3147 NM_0013172    | CXXC5 | 1          |
| hsa-miR-317C NM_0013172    | CXXC5 | 1          |
| hsa-miR-3184 NM_0013172    | CXXC5 | 1          |
| hsa-miR-3065 NM_0013172    | CXXC5 | 1          |

|                                 |   |
|---------------------------------|---|
| hsa-miR-3186 NM_0013172 CXXC5   | 1 |
| hsa-miR-3186 NM_0013172 CXXC5   | 1 |
| hsa-miR-3187 NM_0013172 CXXC5   | 1 |
| hsa-miR-3195 NM_0013172 CXXC5   | 1 |
| hsa-miR-4302 NM_0013172 CXXC5   | 1 |
| hsa-miR-2355 NM_0013172 CXXC5   | 1 |
| hsa-miR-3605 NM_0013172 CXXC5   | 1 |
| hsa-miR-3612 NM_0013172 CXXC5   | 1 |
| hsa-miR-3944 NM_0013172 CXXC5   | 1 |
| hsa-miR-445C NM_0013172 CXXC5   | 1 |
| hsa-miR-378h NM_0013172 CXXC5   | 1 |
| hsa-miR-3685 NM_0013172 CXXC5   | 1 |
| hsa-miR-3155 NM_0013172 CXXC5   | 1 |
| hsa-miR-4487 NM_0013172 CXXC5   | 1 |
| hsa-miR-4536 NM_0013172 CXXC5   | 1 |
| hsa-miR-4665 NM_0013172 CXXC5   | 1 |
| hsa-miR-4674 NM_0013172 CXXC5   | 1 |
| hsa-miR-4686 NM_0013172 CXXC5   | 1 |
| hsa-miR-4693 NM_0013172 CXXC5   | 1 |
| hsa-miR-4721 NM_0013172 CXXC5   | 1 |
| hsa-miR-4722 NM_0013172 CXXC5   | 1 |
| hsa-miR-4732 NM_0013172 CXXC5   | 1 |
| hsa-miR-4743 NM_0013172 CXXC5   | 1 |
| hsa-miR-4745 NM_0013172 CXXC5   | 1 |
| hsa-miR-4753 NM_0013172 CXXC5   | 1 |
| hsa-miR-4764 NM_0013172 CXXC5   | 1 |
| hsa-miR-4768 NM_0013172 CXXC5   | 1 |
| hsa-miR-4436 NM_0013172 CXXC5   | 1 |
| hsa-miR-2467 NM_0013172 CXXC5   | 1 |
| hsa-miR-5004 NM_0013172 CXXC5   | 1 |
| hsa-miR-5091 NM_0013172 CXXC5   | 1 |
| hsa-miR-5571 NM_0013172 CXXC5   | 1 |
| hsa-miR-5694 NM_0013172 CXXC5   | 1 |
| hsa-miR-5695 NM_0013172 CXXC5   | 1 |
| hsa-miR-5695 NM_0013172 CXXC5   | 1 |
| hsa-miR-5787 NM_0013172 CXXC5   | 1 |
| hsa-miR-6084 NM_0013172 CXXC5   | 1 |
| hsa-miR-6085 NM_0013172 CXXC5   | 1 |
| hsa-miR-6086 NM_0013172 CXXC5   | 1 |
| hsa-miR-6125 NM_0013172 CXXC5   | 1 |
| hsa-miR-6165 NM_0013172 CXXC5   | 1 |
| hsa-miR-6727 NM_0013172 CXXC5   | 1 |
| hsa-miR-6734 NM_0013172 CXXC5   | 1 |
| hsa-miR-6747 NM_0013172 CXXC5   | 1 |
| hsa-miR-6754 NM_0013172 CXXC5   | 1 |
| hsa-miR-6756 NM_0013172 CXXC5   | 1 |
| hsa-miR-6757 NM_0013172 CXXC5   | 1 |
| hsa-miR-6767 NM_0013172 CXXC5   | 1 |
| hsa-miR-6785 NM_0013172 CXXC5   | 1 |
| hsa-miR-6794 NM_0013172 CXXC5   | 1 |
| hsa-miR-6795 NM_0013172 CXXC5   | 1 |
| hsa-miR-6795 NM_0013172 CXXC5   | 1 |
| hsa-miR-6798 NM_0013172 CXXC5   | 1 |
| hsa-miR-6803 NM_0013172 CXXC5   | 1 |
| hsa-miR-6805 NM_0013172 CXXC5   | 1 |
| hsa-miR-6817 NM_0013172 CXXC5   | 1 |
| hsa-miR-6826 NM_0013172 CXXC5   | 1 |
| hsa-miR-6826 NM_0013172 CXXC5   | 1 |
| hsa-miR-6834 NM_0013172 CXXC5   | 1 |
| hsa-miR-678C NM_0013172 CXXC5   | 1 |
| hsa-miR-6838 NM_0013172 CXXC5   | 1 |
| hsa-miR-6845 NM_0013172 CXXC5   | 1 |
| hsa-miR-6846 NM_0013172 CXXC5   | 1 |
| hsa-miR-685C NM_0013172 CXXC5   | 1 |
| hsa-miR-6854 NM_0013172 CXXC5   | 1 |
| hsa-miR-6858 NM_0013172 CXXC5   | 1 |
| hsa-miR-687C NM_0013172 CXXC5   | 1 |
| hsa-miR-688C NM_0013172 CXXC5   | 1 |
| hsa-miR-6881 NM_0013172 CXXC5   | 1 |
| hsa-miR-6882 NM_0013172 CXXC5   | 1 |
| hsa-miR-6887 NM_0013172 CXXC5   | 1 |
| hsa-miR-689C NM_0013172 CXXC5   | 1 |
| hsa-miR-7106 NM_0013172 CXXC5   | 1 |
| hsa-miR-7107 NM_0013172 CXXC5   | 1 |
| hsa-miR-711C NM_0013172 CXXC5   | 1 |
| hsa-miR-7154 NM_0013172 CXXC5   | 1 |
| hsa-miR-7846 NM_0013172 CXXC5   | 1 |
| hsa-miR-8065 NM_0013172 CXXC5   | 1 |
| hsa-miR-8073 NM_0013172 CXXC5   | 1 |
| hsa-miR-3085 NM_0013172 CXXC5   | 1 |
| hsa-let-7f-2-3j NM_016463 CXXC5 | 1 |
| hsa-miR-18a- NM_016463 CXXC5    | 1 |
| hsa-miR-23a- NM_016463 CXXC5    | 1 |
| hsa-miR-25-5j NM_016463 CXXC5   | 1 |
| hsa-miR-29b- NM_016463 CXXC5    | 1 |
| hsa-miR-29b- NM_016463 CXXC5    | 1 |
| hsa-miR-215- NM_016463 CXXC5    | 1 |
| hsa-miR-219a NM_016463 CXXC5    | 1 |
| hsa-miR-191- NM_016463 CXXC5    | 1 |
| hsa-miR-125a NM_016463 CXXC5    | 1 |
| hsa-miR-30c- NM_016463 CXXC5    | 1 |
| hsa-miR-296- NM_016463 CXXC5    | 1 |
| hsa-miR-381- NM_016463 CXXC5    | 1 |
| hsa-miR-382- NM_016463 CXXC5    | 1 |
| hsa-miR-328- NM_016463 CXXC5    | 1 |

|              |            |       |            |
|--------------|------------|-------|------------|
| hsa-miR-342- | NM_016463  | CXXC5 | 1          |
| hsa-miR-433- | NM_016463  | CXXC5 | 1          |
| hsa-miR-483- | NM_016463  | CXXC5 | 1          |
| hsa-miR-486- | NM_016463  | CXXC5 | 1          |
| hsa-miR-490- | NM_016463  | CXXC5 | 1          |
| hsa-miR-181d | NM_016463  | CXXC5 | 1          |
| hsa-miR-520e | NM_016463  | CXXC5 | 1          |
| hsa-miR-520d | NM_016463  | CXXC5 | 1          |
| hsa-miR-518a | NM_016463  | CXXC5 | 1          |
| hsa-miR-527  | NM_016463  | CXXC5 | 1          |
| hsa-miR-516a | NM_016463  | CXXC5 | 1          |
| hsa-miR-505- | NM_016463  | CXXC5 | 1          |
| hsa-miR-567  | NM_016463  | CXXC5 | 1          |
| hsa-miR-612  | NM_016463  | CXXC5 | 1          |
| hsa-miR-615- | NM_016463  | CXXC5 | 1          |
| hsa-miR-623  | NM_016463  | CXXC5 | 1          |
| hsa-miR-625- | NM_016463  | CXXC5 | 1          |
| hsa-miR-642a | NM_016463  | CXXC5 | 1          |
| hsa-miR-216b | NM_016463  | CXXC5 | 1          |
| hsa-miR-922  | NM_016463  | CXXC5 | 1          |
| hsa-miR-1207 | NM_016463  | CXXC5 | 1          |
| hsa-miR-1244 | NM_016463  | CXXC5 | 1          |
| hsa-miR-1252 | NM_016463  | CXXC5 | 1          |
| hsa-miR-513c | NM_016463  | CXXC5 | 1          |
| hsa-miR-1911 | NM_016463  | CXXC5 | 1          |
| hsa-miR-1912 | NM_016463  | CXXC5 | 1          |
| hsa-miR-1973 | NM_016463  | CXXC5 | 1          |
| hsa-miR-2861 | NM_016463  | CXXC5 | 1          |
| hsa-miR-3144 | NM_016463  | CXXC5 | 1          |
| hsa-miR-3170 | NM_016463  | CXXC5 | 1          |
| hsa-miR-3065 | NM_016463  | CXXC5 | 1          |
| hsa-miR-3186 | NM_016463  | CXXC5 | 1          |
| hsa-miR-3187 | NM_016463  | CXXC5 | 1          |
| hsa-miR-3195 | NM_016463  | CXXC5 | 1          |
| hsa-miR-2355 | NM_016463  | CXXC5 | 1          |
| hsa-miR-3605 | NM_016463  | CXXC5 | 1          |
| hsa-miR-3612 | NM_016463  | CXXC5 | 1          |
| hsa-miR-4450 | NM_016463  | CXXC5 | 1          |
| hsa-miR-3685 | NM_016463  | CXXC5 | 1          |
| hsa-miR-3155 | NM_016463  | CXXC5 | 1          |
| hsa-miR-4487 | NM_016463  | CXXC5 | 1          |
| hsa-miR-4536 | NM_016463  | CXXC5 | 1          |
| hsa-miR-4686 | NM_016463  | CXXC5 | 1          |
| hsa-miR-4693 | NM_016463  | CXXC5 | 1          |
| hsa-miR-4721 | NM_016463  | CXXC5 | 1          |
| hsa-miR-4732 | NM_016463  | CXXC5 | 1          |
| hsa-miR-4753 | NM_016463  | CXXC5 | 1          |
| hsa-miR-4764 | NM_016463  | CXXC5 | 1          |
| hsa-miR-4768 | NM_016463  | CXXC5 | 1          |
| hsa-miR-4436 | NM_016463  | CXXC5 | 1          |
| hsa-miR-2467 | NM_016463  | CXXC5 | 1          |
| hsa-miR-5004 | NM_016463  | CXXC5 | 1          |
| hsa-miR-5091 | NM_016463  | CXXC5 | 1          |
| hsa-miR-5571 | NM_016463  | CXXC5 | 1          |
| hsa-miR-5694 | NM_016463  | CXXC5 | 1          |
| hsa-miR-5695 | NM_016463  | CXXC5 | 1          |
| hsa-miR-6086 | NM_016463  | CXXC5 | 1          |
| hsa-miR-6125 | NM_016463  | CXXC5 | 1          |
| hsa-miR-6165 | NM_016463  | CXXC5 | 1          |
| hsa-miR-6734 | NM_016463  | CXXC5 | 1          |
| hsa-miR-6747 | NM_016463  | CXXC5 | 1          |
| hsa-miR-6754 | NM_016463  | CXXC5 | 1          |
| hsa-miR-6757 | NM_016463  | CXXC5 | 1          |
| hsa-miR-6767 | NM_016463  | CXXC5 | 1          |
| hsa-miR-6785 | NM_016463  | CXXC5 | 1          |
| hsa-miR-6794 | NM_016463  | CXXC5 | 1          |
| hsa-miR-6795 | NM_016463  | CXXC5 | 1          |
| hsa-miR-6798 | NM_016463  | CXXC5 | 1          |
| hsa-miR-6803 | NM_016463  | CXXC5 | 1          |
| hsa-miR-6805 | NM_016463  | CXXC5 | 1          |
| hsa-miR-6817 | NM_016463  | CXXC5 | 1          |
| hsa-miR-6826 | NM_016463  | CXXC5 | 1          |
| hsa-miR-6834 | NM_016463  | CXXC5 | 1          |
| hsa-miR-6838 | NM_016463  | CXXC5 | 1          |
| hsa-miR-6845 | NM_016463  | CXXC5 | 1          |
| hsa-miR-6846 | NM_016463  | CXXC5 | 1          |
| hsa-miR-6850 | NM_016463  | CXXC5 | 1          |
| hsa-miR-6881 | NM_016463  | CXXC5 | 1          |
| hsa-miR-6887 | NM_016463  | CXXC5 | 1          |
| hsa-miR-6887 | NM_016463  | CXXC5 | 1          |
| hsa-miR-6890 | NM_016463  | CXXC5 | 1          |
| hsa-miR-7106 | NM_016463  | CXXC5 | 1          |
| hsa-miR-7107 | NM_016463  | CXXC5 | 1          |
| hsa-miR-7110 | NM_016463  | CXXC5 | 1          |
| hsa-miR-7154 | NM_016463  | CXXC5 | 1          |
| hsa-miR-7845 | NM_016463  | CXXC5 | 1          |
| hsa-miR-8065 | NM_016463  | CXXC5 | 1          |
| hsa-miR-3085 | NM_016463  | CXXC5 | 1          |
| hsa-miR-548b | NM_0013191 | CD1D  | 0.95384615 |
| hsa-miR-548b | NM_0013717 | CD1D  | 0.95384615 |
| hsa-miR-548b | NM_001766  | CD1D  | 0.95384615 |
| hsa-miR-197- | NM_0013191 | CD1D  | 0.96153846 |
| hsa-miR-198  | NM_0013191 | CD1D  | 0.96153846 |
| hsa-miR-151a | NM_0013191 | CD1D  | 0.96153846 |

|                               |            |
|-------------------------------|------------|
| hsa-miR-126C NM_0013191 CD1D  | 0.96153846 |
| hsa-miR-4253 NM_0013191 CD1D  | 0.96153846 |
| hsa-miR-4633 NM_0013191 CD1D  | 0.96153846 |
| hsa-miR-6791 NM_0013191 CD1D  | 0.96153846 |
| hsa-miR-6794 NM_0013191 CD1D  | 0.96153846 |
| hsa-miR-151a NM_0013717 CD1D  | 0.96153846 |
| hsa-miR-1182 NM_0013717 CD1D  | 0.96153846 |
| hsa-miR-197- NM_0013717 CD1D  | 0.96153846 |
| hsa-miR-198 NM_0013717 CD1D   | 0.96153846 |
| hsa-miR-151a NM_0013717 CD1D  | 0.96153846 |
| hsa-miR-126C NM_0013717 CD1D  | 0.96153846 |
| hsa-miR-4253 NM_0013717 CD1D  | 0.96153846 |
| hsa-miR-4633 NM_0013717 CD1D  | 0.96153846 |
| hsa-miR-6791 NM_0013717 CD1D  | 0.96153846 |
| hsa-miR-6794 NM_0013717 CD1D  | 0.96153846 |
| hsa-miR-151a NM_0013717 CD1D  | 0.96153846 |
| hsa-miR-1182 NM_0013717 CD1D  | 0.96153846 |
| hsa-miR-197- NM_001766 CD1D   | 0.96153846 |
| hsa-miR-198 NM_001766 CD1D    | 0.96153846 |
| hsa-miR-151a NM_001766 CD1D   | 0.96153846 |
| hsa-miR-126C NM_001766 CD1D   | 0.96153846 |
| hsa-miR-4253 NM_001766 CD1D   | 0.96153846 |
| hsa-miR-4633 NM_001766 CD1D   | 0.96153846 |
| hsa-miR-6791 NM_001766 CD1D   | 0.96153846 |
| hsa-miR-6794 NM_001766 CD1D   | 0.96153846 |
| hsa-miR-4487 NM_0013191 CD1D  | 0.97435897 |
| hsa-miR-6802 NM_0013191 CD1D  | 0.97435897 |
| hsa-miR-6881 NM_0013191 CD1D  | 0.97435897 |
| hsa-miR-8485 NM_0013191 CD1D  | 0.97435897 |
| hsa-miR-8485 NM_0013717 CD1D  | 0.97435897 |
| hsa-miR-4487 NM_0013717 CD1D  | 0.97435897 |
| hsa-miR-4633 NM_0013717 CD1D  | 0.97435897 |
| hsa-miR-6802 NM_0013717 CD1D  | 0.97435897 |
| hsa-miR-6881 NM_0013717 CD1D  | 0.97435897 |
| hsa-miR-8485 NM_0013717 CD1D  | 0.97435897 |
| hsa-miR-8485 NM_0013717 CD1D  | 0.97435897 |
| hsa-miR-4487 NM_001766 CD1D   | 0.97435897 |
| hsa-miR-6802 NM_001766 CD1D   | 0.97435897 |
| hsa-miR-6881 NM_001766 CD1D   | 0.97435897 |
| hsa-miR-8485 NM_001766 CD1D   | 0.97435897 |
| hsa-miR-770- NM_0013191 CD1D  | 0.98076923 |
| hsa-miR-4804 NM_0013191 CD1D  | 0.98076923 |
| hsa-miR-6843 NM_0013191 CD1D  | 0.98076923 |
| hsa-miR-4804 NM_0013717 CD1D  | 0.98076923 |
| hsa-miR-6843 NM_0013717 CD1D  | 0.98076923 |
| hsa-miR-4804 NM_0013717 CD1D  | 0.98076923 |
| hsa-miR-6843 NM_0013717 CD1D  | 0.98076923 |
| hsa-miR-4804 NM_0013717 CD1D  | 0.98076923 |
| hsa-miR-4804 NM_001766 CD1D   | 0.98076923 |
| hsa-miR-6843 NM_001766 CD1D   | 0.98076923 |
| hsa-miR-19b- NM_0013191 CD1D  | 1          |
| hsa-miR-25-3j NM_0013191 CD1D | 1          |
| hsa-miR-28-5j NM_0013191 CD1D | 1          |
| hsa-miR-30a- NM_0013191 CD1D  | 1          |
| hsa-miR-31-5j NM_0013191 CD1D | 1          |
| hsa-miR-29b- NM_0013191 CD1D  | 1          |
| hsa-miR-29b- NM_0013191 CD1D  | 1          |
| hsa-miR-198 NM_0013191 CD1D   | 1          |
| hsa-miR-34a- NM_0013191 CD1D  | 1          |
| hsa-miR-196a NM_0013191 CD1D  | 1          |
| hsa-miR-204- NM_0013191 CD1D  | 1          |
| hsa-miR-211- NM_0013191 CD1D  | 1          |
| hsa-miR-218- NM_0013191 CD1D  | 1          |
| hsa-miR-133a NM_0013191 CD1D  | 1          |
| hsa-miR-138- NM_0013191 CD1D  | 1          |
| hsa-miR-125a NM_0013191 CD1D  | 1          |
| hsa-miR-125a NM_0013191 CD1D  | 1          |
| hsa-miR-125b NM_0013191 CD1D  | 1          |
| hsa-miR-138- NM_0013191 CD1D  | 1          |
| hsa-miR-150- NM_0013191 CD1D  | 1          |
| hsa-miR-194- NM_0013191 CD1D  | 1          |
| hsa-miR-194- NM_0013191 CD1D  | 1          |
| hsa-miR-361- NM_0013191 CD1D  | 1          |
| hsa-miR-337- NM_0013191 CD1D  | 1          |
| hsa-miR-337- NM_0013191 CD1D  | 1          |
| hsa-miR-326 NM_0013191 CD1D   | 1          |
| hsa-miR-133b NM_0013191 CD1D  | 1          |
| hsa-miR-431- NM_0013191 CD1D  | 1          |
| hsa-miR-329- NM_0013191 CD1D  | 1          |
| hsa-miR-483- NM_0013191 CD1D  | 1          |
| hsa-miR-484 NM_0013191 CD1D   | 1          |
| hsa-miR-487a NM_0013191 CD1D  | 1          |
| hsa-miR-490- NM_0013191 CD1D  | 1          |
| hsa-miR-202- NM_0013191 CD1D  | 1          |
| hsa-miR-181d NM_0013191 CD1D  | 1          |
| hsa-miR-512- NM_0013191 CD1D  | 1          |
| hsa-miR-525- NM_0013191 CD1D  | 1          |
| hsa-miR-518c NM_0013191 CD1D  | 1          |
| hsa-miR-520c NM_0013191 CD1D  | 1          |
| hsa-miR-505- NM_0013191 CD1D  | 1          |
| hsa-miR-509- NM_0013191 CD1D  | 1          |
| hsa-miR-487b NM_0013191 CD1D  | 1          |
| hsa-miR-556- NM_0013191 CD1D  | 1          |

|                         |            |      |   |
|-------------------------|------------|------|---|
| hsa-miR-574:-NM_0013191 | CD1D       | 1    |   |
| hsa-miR-584:-NM_0013191 | CD1D       | 1    |   |
| hsa-miR-585:-NM_0013191 | CD1D       | 1    |   |
| hsa-miR-589:-NM_0013191 | CD1D       | 1    |   |
| hsa-miR-589:-NM_0013191 | CD1D       | 1    |   |
| hsa-miR-598:-NM_0013191 | CD1D       | 1    |   |
| hsa-miR-602             | NM_0013191 | CD1D | 1 |
| hsa-miR-609             | NM_0013191 | CD1D | 1 |
| hsa-miR-616:-NM_0013191 | CD1D       | 1    |   |
| hsa-miR-621             | NM_0013191 | CD1D | 1 |
| hsa-miR-623             | NM_0013191 | CD1D | 1 |
| hsa-miR-627:-NM_0013191 | CD1D       | 1    |   |
| hsa-miR-646             | NM_0013191 | CD1D | 1 |
| hsa-miR-656:-NM_0013191 | CD1D       | 1    |   |
| hsa-miR-657             | NM_0013191 | CD1D | 1 |
| hsa-miR-659:-NM_0013191 | CD1D       | 1    |   |
| hsa-miR-642:-NM_0013191 | CD1D       | 1    |   |
| hsa-miR-1296            | NM_0013191 | CD1D | 1 |
| hsa-miR-1323            | NM_0013191 | CD1D | 1 |
| hsa-miR-1271            | NM_0013191 | CD1D | 1 |
| hsa-miR-454:-NM_0013191 | CD1D       | 1    |   |
| hsa-miR-1185            | NM_0013191 | CD1D | 1 |
| hsa-miR-1185            | NM_0013191 | CD1D | 1 |
| hsa-miR-892a            | NM_0013191 | CD1D | 1 |
| hsa-miR-892a            | NM_0013191 | CD1D | 1 |
| hsa-miR-874:-NM_0013191 | CD1D       | 1    |   |
| hsa-miR-892b            | NM_0013191 | CD1D | 1 |
| hsa-miR-887:-NM_0013191 | CD1D       | 1    |   |
| hsa-miR-665             | NM_0013191 | CD1D | 1 |
| hsa-miR-873:-NM_0013191 | CD1D       | 1    |   |
| hsa-miR-216b            | NM_0013191 | CD1D | 1 |
| hsa-miR-937:-NM_0013191 | CD1D       | 1    |   |
| hsa-miR-939:-NM_0013191 | CD1D       | 1    |   |
| hsa-miR-1178            | NM_0013191 | CD1D | 1 |
| hsa-miR-1233            | NM_0013191 | CD1D | 1 |
| hsa-miR-1207            | NM_0013191 | CD1D | 1 |
| hsa-miR-1303            | NM_0013191 | CD1D | 1 |
| hsa-miR-1244            | NM_0013191 | CD1D | 1 |
| hsa-miR-1245            | NM_0013191 | CD1D | 1 |
| hsa-miR-1245            | NM_0013191 | CD1D | 1 |
| hsa-miR-1250            | NM_0013191 | CD1D | 1 |
| hsa-miR-1251            | NM_0013191 | CD1D | 1 |
| hsa-miR-1251            | NM_0013191 | CD1D | 1 |
| hsa-miR-1288            | NM_0013191 | CD1D | 1 |
| hsa-miR-1322            | NM_0013191 | CD1D | 1 |
| hsa-miR-1905            | NM_0013191 | CD1D | 1 |
| hsa-miR-1911            | NM_0013191 | CD1D | 1 |
| hsa-miR-1912            | NM_0013191 | CD1D | 1 |
| hsa-miR-2115            | NM_0013191 | CD1D | 1 |
| hsa-miR-2117            | NM_0013191 | CD1D | 1 |
| hsa-miR-2276            | NM_0013191 | CD1D | 1 |
| hsa-miR-3121            | NM_0013191 | CD1D | 1 |
| hsa-miR-3122            | NM_0013191 | CD1D | 1 |
| hsa-miR-3125            | NM_0013191 | CD1D | 1 |
| hsa-miR-3126            | NM_0013191 | CD1D | 1 |
| hsa-miR-3125            | NM_0013191 | CD1D | 1 |
| hsa-miR-466             | NM_0013191 | CD1D | 1 |
| hsa-miR-3152            | NM_0013191 | CD1D | 1 |
| hsa-miR-3162            | NM_0013191 | CD1D | 1 |
| hsa-miR-323b            | NM_0013191 | CD1D | 1 |
| hsa-miR-3174            | NM_0013191 | CD1D | 1 |
| hsa-miR-3175            | NM_0013191 | CD1D | 1 |
| hsa-miR-3186            | NM_0013191 | CD1D | 1 |
| hsa-miR-3187            | NM_0013191 | CD1D | 1 |
| hsa-miR-3194            | NM_0013191 | CD1D | 1 |
| hsa-miR-3198            | NM_0013191 | CD1D | 1 |
| hsa-miR-4295            | NM_0013191 | CD1D | 1 |
| hsa-miR-4302            | NM_0013191 | CD1D | 1 |
| hsa-miR-4306            | NM_0013191 | CD1D | 1 |
| hsa-miR-4314            | NM_0013191 | CD1D | 1 |
| hsa-miR-4315            | NM_0013191 | CD1D | 1 |
| hsa-miR-4258            | NM_0013191 | CD1D | 1 |
| hsa-miR-4255            | NM_0013191 | CD1D | 1 |
| hsa-miR-4254            | NM_0013191 | CD1D | 1 |
| hsa-miR-4326            | NM_0013191 | CD1D | 1 |
| hsa-miR-4327            | NM_0013191 | CD1D | 1 |
| hsa-miR-4268            | NM_0013191 | CD1D | 1 |
| hsa-miR-4268            | NM_0013191 | CD1D | 1 |
| hsa-miR-4278            | NM_0013191 | CD1D | 1 |
| hsa-miR-4280            | NM_0013191 | CD1D | 1 |
| hsa-miR-4287            | NM_0013191 | CD1D | 1 |
| hsa-miR-4292            | NM_0013191 | CD1D | 1 |
| hsa-miR-4285            | NM_0013191 | CD1D | 1 |
| hsa-miR-4330            | NM_0013191 | CD1D | 1 |
| hsa-miR-3620            | NM_0013191 | CD1D | 1 |
| hsa-miR-3622            | NM_0013191 | CD1D | 1 |
| hsa-miR-3622            | NM_0013191 | CD1D | 1 |
| hsa-miR-3655            | NM_0013191 | CD1D | 1 |
| hsa-miR-3667            | NM_0013191 | CD1D | 1 |
| hsa-miR-3675            | NM_0013191 | CD1D | 1 |
| hsa-miR-3677            | NM_0013191 | CD1D | 1 |
| hsa-miR-3678            | NM_0013191 | CD1D | 1 |
| hsa-miR-3692            | NM_0013191 | CD1D | 1 |
| hsa-miR-3692            | NM_0013191 | CD1D | 1 |

|                              |   |
|------------------------------|---|
| hsa-miR-3919 NM_0013191 CD1D | 1 |
| hsa-miR-3927 NM_0013191 CD1D | 1 |
| hsa-miR-3943 NM_0013191 CD1D | 1 |
| hsa-miR-3945 NM_0013191 CD1D | 1 |
| hsa-miR-374c NM_0013191 CD1D | 1 |
| hsa-miR-1268 NM_0013191 CD1D | 1 |
| hsa-miR-378e NM_0013191 CD1D | 1 |
| hsa-miR-4420 NM_0013191 CD1D | 1 |
| hsa-miR-4422 NM_0013191 CD1D | 1 |
| hsa-miR-4462 NM_0013191 CD1D | 1 |
| hsa-miR-4466 NM_0013191 CD1D | 1 |
| hsa-miR-4469 NM_0013191 CD1D | 1 |
| hsa-miR-4470 NM_0013191 CD1D | 1 |
| hsa-miR-4478 NM_0013191 CD1D | 1 |
| hsa-miR-4482 NM_0013191 CD1D | 1 |
| hsa-miR-4494 NM_0013191 CD1D | 1 |
| hsa-miR-4494 NM_0013191 CD1D | 1 |
| hsa-miR-4496 NM_0013191 CD1D | 1 |
| hsa-miR-4497 NM_0013191 CD1D | 1 |
| hsa-miR-4514 NM_0013191 CD1D | 1 |
| hsa-miR-4516 NM_0013191 CD1D | 1 |
| hsa-miR-3973 NM_0013191 CD1D | 1 |
| hsa-miR-4633 NM_0013191 CD1D | 1 |
| hsa-miR-4651 NM_0013191 CD1D | 1 |
| hsa-miR-4655 NM_0013191 CD1D | 1 |
| hsa-miR-4667 NM_0013191 CD1D | 1 |
| hsa-miR-4669 NM_0013191 CD1D | 1 |
| hsa-miR-4675 NM_0013191 CD1D | 1 |
| hsa-miR-4675 NM_0013191 CD1D | 1 |
| hsa-miR-4690 NM_0013191 CD1D | 1 |
| hsa-miR-4694 NM_0013191 CD1D | 1 |
| hsa-miR-4697 NM_0013191 CD1D | 1 |
| hsa-miR-4710 NM_0013191 CD1D | 1 |
| hsa-miR-4713 NM_0013191 CD1D | 1 |
| hsa-miR-4714 NM_0013191 CD1D | 1 |
| hsa-miR-4715 NM_0013191 CD1D | 1 |
| hsa-miR-4717 NM_0013191 CD1D | 1 |
| hsa-miR-4722 NM_0013191 CD1D | 1 |
| hsa-miR-4723 NM_0013191 CD1D | 1 |
| hsa-miR-4723 NM_0013191 CD1D | 1 |
| hsa-miR-4725 NM_0013191 CD1D | 1 |
| hsa-miR-4727 NM_0013191 CD1D | 1 |
| hsa-miR-4734 NM_0013191 CD1D | 1 |
| hsa-miR-4755 NM_0013191 CD1D | 1 |
| hsa-miR-4758 NM_0013191 CD1D | 1 |
| hsa-miR-4769 NM_0013191 CD1D | 1 |
| hsa-miR-4786 NM_0013191 CD1D | 1 |
| hsa-miR-4797 NM_0013191 CD1D | 1 |
| hsa-miR-4800 NM_0013191 CD1D | 1 |
| hsa-miR-4804 NM_0013191 CD1D | 1 |
| hsa-miR-5002 NM_0013191 CD1D | 1 |
| hsa-miR-5008 NM_0013191 CD1D | 1 |
| hsa-miR-5088 NM_0013191 CD1D | 1 |
| hsa-miR-5190 NM_0013191 CD1D | 1 |
| hsa-miR-5193 NM_0013191 CD1D | 1 |
| hsa-miR-5195 NM_0013191 CD1D | 1 |
| hsa-miR-5196 NM_0013191 CD1D | 1 |
| hsa-miR-4524 NM_0013191 CD1D | 1 |
| hsa-miR-664b NM_0013191 CD1D | 1 |
| hsa-miR-5588 NM_0013191 CD1D | 1 |
| hsa-miR-5681 NM_0013191 CD1D | 1 |
| hsa-miR-5698 NM_0013191 CD1D | 1 |
| hsa-miR-5699 NM_0013191 CD1D | 1 |
| hsa-miR-5705 NM_0013191 CD1D | 1 |
| hsa-miR-6080 NM_0013191 CD1D | 1 |
| hsa-miR-6088 NM_0013191 CD1D | 1 |
| hsa-miR-6129 NM_0013191 CD1D | 1 |
| hsa-miR-6133 NM_0013191 CD1D | 1 |
| hsa-miR-6500 NM_0013191 CD1D | 1 |
| hsa-miR-6500 NM_0013191 CD1D | 1 |
| hsa-miR-6503 NM_0013191 CD1D | 1 |
| hsa-miR-6506 NM_0013191 CD1D | 1 |
| hsa-miR-6507 NM_0013191 CD1D | 1 |
| hsa-miR-6510 NM_0013191 CD1D | 1 |
| hsa-miR-6515 NM_0013191 CD1D | 1 |
| hsa-miR-6715 NM_0013191 CD1D | 1 |
| hsa-miR-6722 NM_0013191 CD1D | 1 |
| hsa-miR-892c NM_0013191 CD1D | 1 |
| hsa-miR-6726 NM_0013191 CD1D | 1 |
| hsa-miR-6728 NM_0013191 CD1D | 1 |
| hsa-miR-6733 NM_0013191 CD1D | 1 |
| hsa-miR-6734 NM_0013191 CD1D | 1 |
| hsa-miR-6735 NM_0013191 CD1D | 1 |
| hsa-miR-6737 NM_0013191 CD1D | 1 |
| hsa-miR-6740 NM_0013191 CD1D | 1 |
| hsa-miR-6749 NM_0013191 CD1D | 1 |
| hsa-miR-6754 NM_0013191 CD1D | 1 |
| hsa-miR-6756 NM_0013191 CD1D | 1 |
| hsa-miR-6757 NM_0013191 CD1D | 1 |
| hsa-miR-6758 NM_0013191 CD1D | 1 |
| hsa-miR-6759 NM_0013191 CD1D | 1 |
| hsa-miR-6764 NM_0013191 CD1D | 1 |
| hsa-miR-6778 NM_0013191 CD1D | 1 |
| hsa-miR-6781 NM_0013191 CD1D | 1 |
| hsa-miR-6781 NM_0013191 CD1D | 1 |



|                               |   |
|-------------------------------|---|
| hsa-miR-6785 NM_0013191 CD1D  | 1 |
| hsa-miR-6786 NM_0013191 CD1D  | 1 |
| hsa-miR-6786 NM_0013191 CD1D  | 1 |
| hsa-miR-6788 NM_0013191 CD1D  | 1 |
| hsa-miR-6788 NM_0013191 CD1D  | 1 |
| hsa-miR-6790 NM_0013191 CD1D  | 1 |
| hsa-miR-6794 NM_0013191 CD1D  | 1 |
| hsa-miR-6794 NM_0013191 CD1D  | 1 |
| hsa-miR-6794 NM_0013191 CD1D  | 1 |
| hsa-miR-6795 NM_0013191 CD1D  | 1 |
| hsa-miR-6796 NM_0013191 CD1D  | 1 |
| hsa-miR-6797 NM_0013191 CD1D  | 1 |
| hsa-miR-6806 NM_0013191 CD1D  | 1 |
| hsa-miR-6806 NM_0013191 CD1D  | 1 |
| hsa-miR-6813 NM_0013191 CD1D  | 1 |
| hsa-miR-6817 NM_0013191 CD1D  | 1 |
| hsa-miR-6822 NM_0013191 CD1D  | 1 |
| hsa-miR-6823 NM_0013191 CD1D  | 1 |
| hsa-miR-6824 NM_0013191 CD1D  | 1 |
| hsa-miR-6824 NM_0013191 CD1D  | 1 |
| hsa-miR-6826 NM_0013191 CD1D  | 1 |
| hsa-miR-6827 NM_0013191 CD1D  | 1 |
| hsa-miR-6833 NM_0013191 CD1D  | 1 |
| hsa-miR-6838 NM_0013191 CD1D  | 1 |
| hsa-miR-6838 NM_0013191 CD1D  | 1 |
| hsa-miR-6841 NM_0013191 CD1D  | 1 |
| hsa-miR-6846 NM_0013191 CD1D  | 1 |
| hsa-miR-6846 NM_0013191 CD1D  | 1 |
| hsa-miR-6848 NM_0013191 CD1D  | 1 |
| hsa-miR-6849 NM_0013191 CD1D  | 1 |
| hsa-miR-6852 NM_0013191 CD1D  | 1 |
| hsa-miR-6857 NM_0013191 CD1D  | 1 |
| hsa-miR-6859 NM_0013191 CD1D  | 1 |
| hsa-miR-6859 NM_0013191 CD1D  | 1 |
| hsa-miR-6861 NM_0013191 CD1D  | 1 |
| hsa-miR-6866 NM_0013191 CD1D  | 1 |
| hsa-miR-6873 NM_0013191 CD1D  | 1 |
| hsa-miR-6875 NM_0013191 CD1D  | 1 |
| hsa-miR-6875 NM_0013191 CD1D  | 1 |
| hsa-miR-6876 NM_0013191 CD1D  | 1 |
| hsa-miR-6877 NM_0013191 CD1D  | 1 |
| hsa-miR-6881 NM_0013191 CD1D  | 1 |
| hsa-miR-6882 NM_0013191 CD1D  | 1 |
| hsa-miR-6883 NM_0013191 CD1D  | 1 |
| hsa-miR-6883 NM_0013191 CD1D  | 1 |
| hsa-miR-6886 NM_0013191 CD1D  | 1 |
| hsa-miR-6887 NM_0013191 CD1D  | 1 |
| hsa-miR-6889 NM_0013191 CD1D  | 1 |
| hsa-miR-6890 NM_0013191 CD1D  | 1 |
| hsa-miR-6893 NM_0013191 CD1D  | 1 |
| hsa-miR-6894 NM_0013191 CD1D  | 1 |
| hsa-miR-6894 NM_0013191 CD1D  | 1 |
| hsa-miR-7106 NM_0013191 CD1D  | 1 |
| hsa-miR-7110 NM_0013191 CD1D  | 1 |
| hsa-miR-7110 NM_0013191 CD1D  | 1 |
| hsa-miR-7111 NM_0013191 CD1D  | 1 |
| hsa-miR-7155 NM_0013191 CD1D  | 1 |
| hsa-miR-7159 NM_0013191 CD1D  | 1 |
| hsa-miR-7160 NM_0013191 CD1D  | 1 |
| hsa-miR-7843 NM_0013191 CD1D  | 1 |
| hsa-miR-7843 NM_0013191 CD1D  | 1 |
| hsa-miR-6516 NM_0013191 CD1D  | 1 |
| hsa-miR-7850 NM_0013191 CD1D  | 1 |
| hsa-miR-7850 NM_0013191 CD1D  | 1 |
| hsa-miR-7851 NM_0013191 CD1D  | 1 |
| hsa-miR-8058 NM_0013191 CD1D  | 1 |
| hsa-miR-8065 NM_0013191 CD1D  | 1 |
| hsa-miR-8077 NM_0013191 CD1D  | 1 |
| hsa-miR-8081 NM_0013191 CD1D  | 1 |
| hsa-miR-8089 NM_0013191 CD1D  | 1 |
| hsa-miR-1843 NM_0013191 CD1D  | 1 |
| hsa-miR-1022 NM_0013191 CD1D  | 1 |
| hsa-miR-1039 NM_0013191 CD1D  | 1 |
| hsa-miR-1039 NM_0013191 CD1D  | 1 |
| hsa-miR-1052 NM_0013191 CD1D  | 1 |
| hsa-miR-1139 NM_0013191 CD1D  | 1 |
| hsa-miR-1211 NM_0013191 CD1D  | 1 |
| hsa-miR-1211 NM_0013191 CD1D  | 1 |
| hsa-miR-1211 NM_0013191 CD1D  | 1 |
| hsa-miR-1212 NM_0013191 CD1D  | 1 |
| hsa-miR-19b-1 NM_0013717 CD1D | 1 |
| hsa-miR-31-5j NM_0013717 CD1D | 1 |
| hsa-miR-198 NM_0013717 CD1D   | 1 |
| hsa-miR-196a NM_0013717 CD1D  | 1 |
| hsa-miR-218-1 NM_0013717 CD1D | 1 |
| hsa-miR-125a NM_0013717 CD1D  | 1 |
| hsa-miR-125a NM_0013717 CD1D  | 1 |
| hsa-miR-431-1 NM_0013717 CD1D | 1 |
| hsa-miR-520d NM_0013717 CD1D  | 1 |
| hsa-miR-574-1 NM_0013717 CD1D | 1 |
| hsa-miR-602 NM_0013717 CD1D   | 1 |

|               |            |      |   |
|---------------|------------|------|---|
| hsa-miR-609   | NM_0013717 | CD1D | 1 |
| hsa-miR-646   | NM_0013717 | CD1D | 1 |
| hsa-miR-656-  | NM_0013717 | CD1D | 1 |
| hsa-miR-892a  | NM_0013717 | CD1D | 1 |
| hsa-miR-939-  | NM_0013717 | CD1D | 1 |
| hsa-miR-1244  | NM_0013717 | CD1D | 1 |
| hsa-miR-1251  | NM_0013717 | CD1D | 1 |
| hsa-miR-1288  | NM_0013717 | CD1D | 1 |
| hsa-miR-1912  | NM_0013717 | CD1D | 1 |
| hsa-miR-3121  | NM_0013717 | CD1D | 1 |
| hsa-miR-3152  | NM_0013717 | CD1D | 1 |
| hsa-miR-3198  | NM_0013717 | CD1D | 1 |
| hsa-miR-4319  | NM_0013717 | CD1D | 1 |
| hsa-miR-4259  | NM_0013717 | CD1D | 1 |
| hsa-miR-428C  | NM_0013717 | CD1D | 1 |
| hsa-miR-3927  | NM_0013717 | CD1D | 1 |
| hsa-miR-442C  | NM_0013717 | CD1D | 1 |
| hsa-miR-4462  | NM_0013717 | CD1D | 1 |
| hsa-miR-4478  | NM_0013717 | CD1D | 1 |
| hsa-miR-4494  | NM_0013717 | CD1D | 1 |
| hsa-miR-469C  | NM_0013717 | CD1D | 1 |
| hsa-miR-4694  | NM_0013717 | CD1D | 1 |
| hsa-miR-4715  | NM_0013717 | CD1D | 1 |
| hsa-miR-4786  | NM_0013717 | CD1D | 1 |
| hsa-miR-480C  | NM_0013717 | CD1D | 1 |
| hsa-miR-5002  | NM_0013717 | CD1D | 1 |
| hsa-miR-519C  | NM_0013717 | CD1D | 1 |
| hsa-miR-5195  | NM_0013717 | CD1D | 1 |
| hsa-miR-6726  | NM_0013717 | CD1D | 1 |
| hsa-miR-6735  | NM_0013717 | CD1D | 1 |
| hsa-miR-6768  | NM_0013717 | CD1D | 1 |
| hsa-miR-6781  | NM_0013717 | CD1D | 1 |
| hsa-miR-6827  | NM_0013717 | CD1D | 1 |
| hsa-miR-6838  | NM_0013717 | CD1D | 1 |
| hsa-miR-6849  | NM_0013717 | CD1D | 1 |
| hsa-miR-6852  | NM_0013717 | CD1D | 1 |
| hsa-miR-6875  | NM_0013717 | CD1D | 1 |
| hsa-miR-6882  | NM_0013717 | CD1D | 1 |
| hsa-miR-6883  | NM_0013717 | CD1D | 1 |
| hsa-miR-6889  | NM_0013717 | CD1D | 1 |
| hsa-miR-6894  | NM_0013717 | CD1D | 1 |
| hsa-miR-711C  | NM_0013717 | CD1D | 1 |
| hsa-miR-7152  | NM_0013717 | CD1D | 1 |
| hsa-miR-6516  | NM_0013717 | CD1D | 1 |
| hsa-miR-8077  | NM_0013717 | CD1D | 1 |
| hsa-miR-8081  | NM_0013717 | CD1D | 1 |
| hsa-miR-8083  | NM_0013717 | CD1D | 1 |
| hsa-miR-1211  | NM_0013717 | CD1D | 1 |
| hsa-miR-19b-  | NM_0013717 | CD1D | 1 |
| hsa-miR-25-3j | NM_0013717 | CD1D | 1 |
| hsa-miR-28-5j | NM_0013717 | CD1D | 1 |
| hsa-miR-30a-  | NM_0013717 | CD1D | 1 |
| hsa-miR-31-5j | NM_0013717 | CD1D | 1 |
| hsa-miR-29b-  | NM_0013717 | CD1D | 1 |
| hsa-miR-29b-  | NM_0013717 | CD1D | 1 |
| hsa-miR-198   | NM_0013717 | CD1D | 1 |
| hsa-miR-34a-  | NM_0013717 | CD1D | 1 |
| hsa-miR-183-  | NM_0013717 | CD1D | 1 |
| hsa-miR-196a  | NM_0013717 | CD1D | 1 |
| hsa-miR-204-  | NM_0013717 | CD1D | 1 |
| hsa-miR-211-  | NM_0013717 | CD1D | 1 |
| hsa-miR-218-  | NM_0013717 | CD1D | 1 |
| hsa-miR-133a  | NM_0013717 | CD1D | 1 |
| hsa-miR-138-  | NM_0013717 | CD1D | 1 |
| hsa-miR-125a  | NM_0013717 | CD1D | 1 |
| hsa-miR-125a  | NM_0013717 | CD1D | 1 |
| hsa-miR-138-  | NM_0013717 | CD1D | 1 |
| hsa-miR-150-  | NM_0013717 | CD1D | 1 |
| hsa-miR-194-  | NM_0013717 | CD1D | 1 |
| hsa-miR-194-  | NM_0013717 | CD1D | 1 |
| hsa-miR-361-  | NM_0013717 | CD1D | 1 |
| hsa-miR-337-  | NM_0013717 | CD1D | 1 |
| hsa-miR-337-  | NM_0013717 | CD1D | 1 |
| hsa-miR-326   | NM_0013717 | CD1D | 1 |
| hsa-miR-133b  | NM_0013717 | CD1D | 1 |
| hsa-miR-431-  | NM_0013717 | CD1D | 1 |
| hsa-miR-483-  | NM_0013717 | CD1D | 1 |
| hsa-miR-484   | NM_0013717 | CD1D | 1 |
| hsa-miR-487a  | NM_0013717 | CD1D | 1 |
| hsa-miR-490-  | NM_0013717 | CD1D | 1 |
| hsa-miR-202-  | NM_0013717 | CD1D | 1 |
| hsa-miR-512-  | NM_0013717 | CD1D | 1 |
| hsa-miR-525-  | NM_0013717 | CD1D | 1 |
| hsa-miR-518c  | NM_0013717 | CD1D | 1 |
| hsa-miR-520d  | NM_0013717 | CD1D | 1 |
| hsa-miR-505-  | NM_0013717 | CD1D | 1 |
| hsa-miR-509-  | NM_0013717 | CD1D | 1 |
| hsa-miR-487b  | NM_0013717 | CD1D | 1 |
| hsa-miR-556-  | NM_0013717 | CD1D | 1 |
| hsa-miR-574-  | NM_0013717 | CD1D | 1 |
| hsa-miR-584-  | NM_0013717 | CD1D | 1 |
| hsa-miR-585-  | NM_0013717 | CD1D | 1 |
| hsa-miR-589-  | NM_0013717 | CD1D | 1 |
| hsa-miR-598-  | NM_0013717 | CD1D | 1 |

|              |            |      |   |
|--------------|------------|------|---|
| hsa-miR-602  | NM_0013717 | CD1D | 1 |
| hsa-miR-616- | NM_0013717 | CD1D | 1 |
| hsa-miR-621  | NM_0013717 | CD1D | 1 |
| hsa-miR-623  | NM_0013717 | CD1D | 1 |
| hsa-miR-627- | NM_0013717 | CD1D | 1 |
| hsa-miR-646  | NM_0013717 | CD1D | 1 |
| hsa-miR-656- | NM_0013717 | CD1D | 1 |
| hsa-miR-657  | NM_0013717 | CD1D | 1 |
| hsa-miR-659- | NM_0013717 | CD1D | 1 |
| hsa-miR-542- | NM_0013717 | CD1D | 1 |
| hsa-miR-1296 | NM_0013717 | CD1D | 1 |
| hsa-miR-1323 | NM_0013717 | CD1D | 1 |
| hsa-miR-1271 | NM_0013717 | CD1D | 1 |
| hsa-miR-454- | NM_0013717 | CD1D | 1 |
| hsa-miR-1185 | NM_0013717 | CD1D | 1 |
| hsa-miR-1185 | NM_0013717 | CD1D | 1 |
| hsa-miR-892a | NM_0013717 | CD1D | 1 |
| hsa-miR-892a | NM_0013717 | CD1D | 1 |
| hsa-miR-887- | NM_0013717 | CD1D | 1 |
| hsa-miR-873- | NM_0013717 | CD1D | 1 |
| hsa-miR-216b | NM_0013717 | CD1D | 1 |
| hsa-miR-939- | NM_0013717 | CD1D | 1 |
| hsa-miR-1178 | NM_0013717 | CD1D | 1 |
| hsa-miR-1207 | NM_0013717 | CD1D | 1 |
| hsa-miR-1291 | NM_0013717 | CD1D | 1 |
| hsa-miR-1303 | NM_0013717 | CD1D | 1 |
| hsa-miR-1244 | NM_0013717 | CD1D | 1 |
| hsa-miR-1245 | NM_0013717 | CD1D | 1 |
| hsa-miR-125C | NM_0013717 | CD1D | 1 |
| hsa-miR-1251 | NM_0013717 | CD1D | 1 |
| hsa-miR-1251 | NM_0013717 | CD1D | 1 |
| hsa-miR-1265 | NM_0013717 | CD1D | 1 |
| hsa-miR-1288 | NM_0013717 | CD1D | 1 |
| hsa-miR-1905 | NM_0013717 | CD1D | 1 |
| hsa-miR-1911 | NM_0013717 | CD1D | 1 |
| hsa-miR-1912 | NM_0013717 | CD1D | 1 |
| hsa-miR-2115 | NM_0013717 | CD1D | 1 |
| hsa-miR-2117 | NM_0013717 | CD1D | 1 |
| hsa-miR-2276 | NM_0013717 | CD1D | 1 |
| hsa-miR-3121 | NM_0013717 | CD1D | 1 |
| hsa-miR-3122 | NM_0013717 | CD1D | 1 |
| hsa-miR-3125 | NM_0013717 | CD1D | 1 |
| hsa-miR-3125 | NM_0013717 | CD1D | 1 |
| hsa-miR-466  | NM_0013717 | CD1D | 1 |
| hsa-miR-3162 | NM_0013717 | CD1D | 1 |
| hsa-miR-3174 | NM_0013717 | CD1D | 1 |
| hsa-miR-3175 | NM_0013717 | CD1D | 1 |
| hsa-miR-3186 | NM_0013717 | CD1D | 1 |
| hsa-miR-3187 | NM_0013717 | CD1D | 1 |
| hsa-miR-3198 | NM_0013717 | CD1D | 1 |
| hsa-miR-4295 | NM_0013717 | CD1D | 1 |
| hsa-miR-4302 | NM_0013717 | CD1D | 1 |
| hsa-miR-4306 | NM_0013717 | CD1D | 1 |
| hsa-miR-4314 | NM_0013717 | CD1D | 1 |
| hsa-miR-4315 | NM_0013717 | CD1D | 1 |
| hsa-miR-4255 | NM_0013717 | CD1D | 1 |
| hsa-miR-4254 | NM_0013717 | CD1D | 1 |
| hsa-miR-4326 | NM_0013717 | CD1D | 1 |
| hsa-miR-4327 | NM_0013717 | CD1D | 1 |
| hsa-miR-4268 | NM_0013717 | CD1D | 1 |
| hsa-miR-4268 | NM_0013717 | CD1D | 1 |
| hsa-miR-4278 | NM_0013717 | CD1D | 1 |
| hsa-miR-428C | NM_0013717 | CD1D | 1 |
| hsa-miR-4287 | NM_0013717 | CD1D | 1 |
| hsa-miR-4292 | NM_0013717 | CD1D | 1 |
| hsa-miR-433C | NM_0013717 | CD1D | 1 |
| hsa-miR-3622 | NM_0013717 | CD1D | 1 |
| hsa-miR-3655 | NM_0013717 | CD1D | 1 |
| hsa-miR-3667 | NM_0013717 | CD1D | 1 |
| hsa-miR-3675 | NM_0013717 | CD1D | 1 |
| hsa-miR-3677 | NM_0013717 | CD1D | 1 |
| hsa-miR-3678 | NM_0013717 | CD1D | 1 |
| hsa-miR-3692 | NM_0013717 | CD1D | 1 |
| hsa-miR-3692 | NM_0013717 | CD1D | 1 |
| hsa-miR-3915 | NM_0013717 | CD1D | 1 |
| hsa-miR-3927 | NM_0013717 | CD1D | 1 |
| hsa-miR-3943 | NM_0013717 | CD1D | 1 |
| hsa-miR-3945 | NM_0013717 | CD1D | 1 |
| hsa-miR-1268 | NM_0013717 | CD1D | 1 |
| hsa-miR-442C | NM_0013717 | CD1D | 1 |
| hsa-miR-4422 | NM_0013717 | CD1D | 1 |
| hsa-miR-4462 | NM_0013717 | CD1D | 1 |
| hsa-miR-4466 | NM_0013717 | CD1D | 1 |
| hsa-miR-4465 | NM_0013717 | CD1D | 1 |
| hsa-miR-447C | NM_0013717 | CD1D | 1 |
| hsa-miR-4478 | NM_0013717 | CD1D | 1 |
| hsa-miR-4482 | NM_0013717 | CD1D | 1 |
| hsa-miR-4494 | NM_0013717 | CD1D | 1 |
| hsa-miR-4494 | NM_0013717 | CD1D | 1 |
| hsa-miR-4496 | NM_0013717 | CD1D | 1 |
| hsa-miR-4497 | NM_0013717 | CD1D | 1 |
| hsa-miR-3973 | NM_0013717 | CD1D | 1 |
| hsa-miR-4651 | NM_0013717 | CD1D | 1 |
| hsa-miR-4655 | NM_0013717 | CD1D | 1 |

|                              |   |
|------------------------------|---|
| hsa-miR-4667 NM_0013717 CD1D | 1 |
| hsa-miR-4669 NM_0013717 CD1D | 1 |
| hsa-miR-4675 NM_0013717 CD1D | 1 |
| hsa-miR-469C NM_0013717 CD1D | 1 |
| hsa-miR-4694 NM_0013717 CD1D | 1 |
| hsa-miR-4697 NM_0013717 CD1D | 1 |
| hsa-miR-471C NM_0013717 CD1D | 1 |
| hsa-miR-4713 NM_0013717 CD1D | 1 |
| hsa-miR-4714 NM_0013717 CD1D | 1 |
| hsa-miR-4715 NM_0013717 CD1D | 1 |
| hsa-miR-4723 NM_0013717 CD1D | 1 |
| hsa-miR-4723 NM_0013717 CD1D | 1 |
| hsa-miR-4725 NM_0013717 CD1D | 1 |
| hsa-miR-4727 NM_0013717 CD1D | 1 |
| hsa-miR-4734 NM_0013717 CD1D | 1 |
| hsa-miR-4755 NM_0013717 CD1D | 1 |
| hsa-miR-4758 NM_0013717 CD1D | 1 |
| hsa-miR-4765 NM_0013717 CD1D | 1 |
| hsa-miR-4786 NM_0013717 CD1D | 1 |
| hsa-miR-4797 NM_0013717 CD1D | 1 |
| hsa-miR-480C NM_0013717 CD1D | 1 |
| hsa-miR-4804 NM_0013717 CD1D | 1 |
| hsa-miR-5002 NM_0013717 CD1D | 1 |
| hsa-miR-5008 NM_0013717 CD1D | 1 |
| hsa-miR-5088 NM_0013717 CD1D | 1 |
| hsa-miR-519C NM_0013717 CD1D | 1 |
| hsa-miR-5195 NM_0013717 CD1D | 1 |
| hsa-miR-5196 NM_0013717 CD1D | 1 |
| hsa-miR-4524 NM_0013717 CD1D | 1 |
| hsa-miR-664b NM_0013717 CD1D | 1 |
| hsa-miR-5588 NM_0013717 CD1D | 1 |
| hsa-miR-5591 NM_0013717 CD1D | 1 |
| hsa-miR-5681 NM_0013717 CD1D | 1 |
| hsa-miR-5698 NM_0013717 CD1D | 1 |
| hsa-miR-5695 NM_0013717 CD1D | 1 |
| hsa-miR-608C NM_0013717 CD1D | 1 |
| hsa-miR-6088 NM_0013717 CD1D | 1 |
| hsa-miR-6125 NM_0013717 CD1D | 1 |
| hsa-miR-6133 NM_0013717 CD1D | 1 |
| hsa-miR-650C NM_0013717 CD1D | 1 |
| hsa-miR-6503 NM_0013717 CD1D | 1 |
| hsa-miR-6506 NM_0013717 CD1D | 1 |
| hsa-miR-6507 NM_0013717 CD1D | 1 |
| hsa-miR-6515 NM_0013717 CD1D | 1 |
| hsa-miR-6715 NM_0013717 CD1D | 1 |
| hsa-miR-892c NM_0013717 CD1D | 1 |
| hsa-miR-6726 NM_0013717 CD1D | 1 |
| hsa-miR-6728 NM_0013717 CD1D | 1 |
| hsa-miR-6733 NM_0013717 CD1D | 1 |
| hsa-miR-6734 NM_0013717 CD1D | 1 |
| hsa-miR-6735 NM_0013717 CD1D | 1 |
| hsa-miR-6737 NM_0013717 CD1D | 1 |
| hsa-miR-674C NM_0013717 CD1D | 1 |
| hsa-miR-6745 NM_0013717 CD1D | 1 |
| hsa-miR-6754 NM_0013717 CD1D | 1 |
| hsa-miR-6756 NM_0013717 CD1D | 1 |
| hsa-miR-6758 NM_0013717 CD1D | 1 |
| hsa-miR-6759 NM_0013717 CD1D | 1 |
| hsa-miR-6764 NM_0013717 CD1D | 1 |
| hsa-miR-6778 NM_0013717 CD1D | 1 |
| hsa-miR-6781 NM_0013717 CD1D | 1 |
| hsa-miR-6785 NM_0013717 CD1D | 1 |
| hsa-miR-6786 NM_0013717 CD1D | 1 |
| hsa-miR-6788 NM_0013717 CD1D | 1 |
| hsa-miR-6788 NM_0013717 CD1D | 1 |
| hsa-miR-679C NM_0013717 CD1D | 1 |
| hsa-miR-6794 NM_0013717 CD1D | 1 |
| hsa-miR-6794 NM_0013717 CD1D | 1 |
| hsa-miR-6795 NM_0013717 CD1D | 1 |
| hsa-miR-6796 NM_0013717 CD1D | 1 |
| hsa-miR-6797 NM_0013717 CD1D | 1 |
| hsa-miR-6797 NM_0013717 CD1D | 1 |
| hsa-miR-6797 NM_0013717 CD1D | 1 |
| hsa-miR-6805 NM_0013717 CD1D | 1 |
| hsa-miR-6813 NM_0013717 CD1D | 1 |
| hsa-miR-6817 NM_0013717 CD1D | 1 |
| hsa-miR-6822 NM_0013717 CD1D | 1 |
| hsa-miR-6823 NM_0013717 CD1D | 1 |
| hsa-miR-6823 NM_0013717 CD1D | 1 |
| hsa-miR-6826 NM_0013717 CD1D | 1 |
| hsa-miR-6827 NM_0013717 CD1D | 1 |
| hsa-miR-6833 NM_0013717 CD1D | 1 |
| hsa-miR-6838 NM_0013717 CD1D | 1 |
| hsa-miR-6838 NM_0013717 CD1D | 1 |
| hsa-miR-6846 NM_0013717 CD1D | 1 |
| hsa-miR-6845 NM_0013717 CD1D | 1 |
| hsa-miR-6852 NM_0013717 CD1D | 1 |
| hsa-miR-6855 NM_0013717 CD1D | 1 |
| hsa-miR-6855 NM_0013717 CD1D | 1 |
| hsa-miR-6866 NM_0013717 CD1D | 1 |
| hsa-miR-687C NM_0013717 CD1D | 1 |
| hsa-miR-6873 NM_0013717 CD1D | 1 |
| hsa-miR-6875 NM_0013717 CD1D | 1 |
| hsa-miR-6875 NM_0013717 CD1D | 1 |

|                               |   |
|-------------------------------|---|
| hsa-miR-6876 NM_0013717 CD1D  | 1 |
| hsa-miR-6877 NM_0013717 CD1D  | 1 |
| hsa-miR-6882 NM_0013717 CD1D  | 1 |
| hsa-miR-6883 NM_0013717 CD1D  | 1 |
| hsa-miR-6883 NM_0013717 CD1D  | 1 |
| hsa-miR-6886 NM_0013717 CD1D  | 1 |
| hsa-miR-6887 NM_0013717 CD1D  | 1 |
| hsa-miR-6889 NM_0013717 CD1D  | 1 |
| hsa-miR-689C NM_0013717 CD1D  | 1 |
| hsa-miR-6893 NM_0013717 CD1D  | 1 |
| hsa-miR-6894 NM_0013717 CD1D  | 1 |
| hsa-miR-6894 NM_0013717 CD1D  | 1 |
| hsa-miR-7106 NM_0013717 CD1D  | 1 |
| hsa-miR-711C NM_0013717 CD1D  | 1 |
| hsa-miR-7111 NM_0013717 CD1D  | 1 |
| hsa-miR-7159 NM_0013717 CD1D  | 1 |
| hsa-miR-716C NM_0013717 CD1D  | 1 |
| hsa-miR-6516 NM_0013717 CD1D  | 1 |
| hsa-miR-785C NM_0013717 CD1D  | 1 |
| hsa-miR-785C NM_0013717 CD1D  | 1 |
| hsa-miR-7851 NM_0013717 CD1D  | 1 |
| hsa-miR-8058 NM_0013717 CD1D  | 1 |
| hsa-miR-8065 NM_0013717 CD1D  | 1 |
| hsa-miR-8077 NM_0013717 CD1D  | 1 |
| hsa-miR-8081 NM_0013717 CD1D  | 1 |
| hsa-miR-8083 NM_0013717 CD1D  | 1 |
| hsa-miR-1843 NM_0013717 CD1D  | 1 |
| hsa-miR-1039 NM_0013717 CD1D  | 1 |
| hsa-miR-1039 NM_0013717 CD1D  | 1 |
| hsa-miR-1211 NM_0013717 CD1D  | 1 |
| hsa-miR-1211 NM_0013717 CD1D  | 1 |
| hsa-miR-1212 NM_0013717 CD1D  | 1 |
| hsa-miR-19b-: NM_0013717 CD1D | 1 |
| hsa-miR-31-5j NM_0013717 CD1D | 1 |
| hsa-miR-198 NM_0013717 CD1D   | 1 |
| hsa-miR-196a NM_0013717 CD1D  | 1 |
| hsa-miR-218- NM_0013717 CD1D  | 1 |
| hsa-miR-125a NM_0013717 CD1D  | 1 |
| hsa-miR-125a NM_0013717 CD1D  | 1 |
| hsa-miR-431-: NM_0013717 CD1D | 1 |
| hsa-miR-520c NM_0013717 CD1D  | 1 |
| hsa-miR-574-: NM_0013717 CD1D | 1 |
| hsa-miR-602 NM_0013717 CD1D   | 1 |
| hsa-miR-609 NM_0013717 CD1D   | 1 |
| hsa-miR-646 NM_0013717 CD1D   | 1 |
| hsa-miR-656-: NM_0013717 CD1D | 1 |
| hsa-miR-892a NM_0013717 CD1D  | 1 |
| hsa-miR-939-: NM_0013717 CD1D | 1 |
| hsa-miR-1244 NM_0013717 CD1D  | 1 |
| hsa-miR-1251 NM_0013717 CD1D  | 1 |
| hsa-miR-1288 NM_0013717 CD1D  | 1 |
| hsa-miR-1912 NM_0013717 CD1D  | 1 |
| hsa-miR-3121 NM_0013717 CD1D  | 1 |
| hsa-miR-3152 NM_0013717 CD1D  | 1 |
| hsa-miR-3198 NM_0013717 CD1D  | 1 |
| hsa-miR-4319 NM_0013717 CD1D  | 1 |
| hsa-miR-4259 NM_0013717 CD1D  | 1 |
| hsa-miR-428C NM_0013717 CD1D  | 1 |
| hsa-miR-3927 NM_0013717 CD1D  | 1 |
| hsa-miR-442C NM_0013717 CD1D  | 1 |
| hsa-miR-4462 NM_0013717 CD1D  | 1 |
| hsa-miR-4478 NM_0013717 CD1D  | 1 |
| hsa-miR-4494 NM_0013717 CD1D  | 1 |
| hsa-miR-469C NM_0013717 CD1D  | 1 |
| hsa-miR-4694 NM_0013717 CD1D  | 1 |
| hsa-miR-4715 NM_0013717 CD1D  | 1 |
| hsa-miR-4786 NM_0013717 CD1D  | 1 |
| hsa-miR-480C NM_0013717 CD1D  | 1 |
| hsa-miR-5002 NM_0013717 CD1D  | 1 |
| hsa-miR-519C NM_0013717 CD1D  | 1 |
| hsa-miR-5195 NM_0013717 CD1D  | 1 |
| hsa-miR-6726 NM_0013717 CD1D  | 1 |
| hsa-miR-6735 NM_0013717 CD1D  | 1 |
| hsa-miR-6768 NM_0013717 CD1D  | 1 |
| hsa-miR-6781 NM_0013717 CD1D  | 1 |
| hsa-miR-6827 NM_0013717 CD1D  | 1 |
| hsa-miR-6849 NM_0013717 CD1D  | 1 |
| hsa-miR-6852 NM_0013717 CD1D  | 1 |
| hsa-miR-6875 NM_0013717 CD1D  | 1 |
| hsa-miR-6882 NM_0013717 CD1D  | 1 |
| hsa-miR-6883 NM_0013717 CD1D  | 1 |
| hsa-miR-6889 NM_0013717 CD1D  | 1 |
| hsa-miR-6894 NM_0013717 CD1D  | 1 |
| hsa-miR-7152 NM_0013717 CD1D  | 1 |
| hsa-miR-6516 NM_0013717 CD1D  | 1 |
| hsa-miR-8077 NM_0013717 CD1D  | 1 |
| hsa-miR-8081 NM_0013717 CD1D  | 1 |
| hsa-miR-8083 NM_0013717 CD1D  | 1 |
| hsa-miR-1211 NM_0013717 CD1D  | 1 |
| hsa-miR-19b-: NM_001766 CD1D  | 1 |
| hsa-miR-25-3j NM_001766 CD1D  | 1 |
| hsa-miR-28-5j NM_001766 CD1D  | 1 |
| hsa-miR-30a-: NM_001766 CD1D  | 1 |
| hsa-miR-31-5j NM_001766 CD1D  | 1 |

|              |           |      |   |
|--------------|-----------|------|---|
| hsa-miR-29b- | NM_001766 | CD1D | 1 |
| hsa-miR-198  | NM_001766 | CD1D | 1 |
| hsa-miR-34a- | NM_001766 | CD1D | 1 |
| hsa-miR-183- | NM_001766 | CD1D | 1 |
| hsa-miR-196a | NM_001766 | CD1D | 1 |
| hsa-miR-204- | NM_001766 | CD1D | 1 |
| hsa-miR-211- | NM_001766 | CD1D | 1 |
| hsa-miR-218- | NM_001766 | CD1D | 1 |
| hsa-miR-133a | NM_001766 | CD1D | 1 |
| hsa-miR-138- | NM_001766 | CD1D | 1 |
| hsa-miR-125a | NM_001766 | CD1D | 1 |
| hsa-miR-125a | NM_001766 | CD1D | 1 |
| hsa-miR-138- | NM_001766 | CD1D | 1 |
| hsa-miR-150- | NM_001766 | CD1D | 1 |
| hsa-miR-194- | NM_001766 | CD1D | 1 |
| hsa-miR-194- | NM_001766 | CD1D | 1 |
| hsa-miR-361- | NM_001766 | CD1D | 1 |
| hsa-miR-337- | NM_001766 | CD1D | 1 |
| hsa-miR-337- | NM_001766 | CD1D | 1 |
| hsa-miR-326  | NM_001766 | CD1D | 1 |
| hsa-miR-133b | NM_001766 | CD1D | 1 |
| hsa-miR-431- | NM_001766 | CD1D | 1 |
| hsa-miR-483- | NM_001766 | CD1D | 1 |
| hsa-miR-484  | NM_001766 | CD1D | 1 |
| hsa-miR-487a | NM_001766 | CD1D | 1 |
| hsa-miR-490- | NM_001766 | CD1D | 1 |
| hsa-miR-202- | NM_001766 | CD1D | 1 |
| hsa-miR-512- | NM_001766 | CD1D | 1 |
| hsa-miR-525- | NM_001766 | CD1D | 1 |
| hsa-miR-518c | NM_001766 | CD1D | 1 |
| hsa-miR-520c | NM_001766 | CD1D | 1 |
| hsa-miR-505- | NM_001766 | CD1D | 1 |
| hsa-miR-509- | NM_001766 | CD1D | 1 |
| hsa-miR-487b | NM_001766 | CD1D | 1 |
| hsa-miR-556- | NM_001766 | CD1D | 1 |
| hsa-miR-574- | NM_001766 | CD1D | 1 |
| hsa-miR-584- | NM_001766 | CD1D | 1 |
| hsa-miR-585- | NM_001766 | CD1D | 1 |
| hsa-miR-589- | NM_001766 | CD1D | 1 |
| hsa-miR-598- | NM_001766 | CD1D | 1 |
| hsa-miR-602  | NM_001766 | CD1D | 1 |
| hsa-miR-616- | NM_001766 | CD1D | 1 |
| hsa-miR-621  | NM_001766 | CD1D | 1 |
| hsa-miR-623  | NM_001766 | CD1D | 1 |
| hsa-miR-627- | NM_001766 | CD1D | 1 |
| hsa-miR-646  | NM_001766 | CD1D | 1 |
| hsa-miR-656- | NM_001766 | CD1D | 1 |
| hsa-miR-657  | NM_001766 | CD1D | 1 |
| hsa-miR-659- | NM_001766 | CD1D | 1 |
| hsa-miR-542- | NM_001766 | CD1D | 1 |
| hsa-miR-1296 | NM_001766 | CD1D | 1 |
| hsa-miR-1323 | NM_001766 | CD1D | 1 |
| hsa-miR-1271 | NM_001766 | CD1D | 1 |
| hsa-miR-454- | NM_001766 | CD1D | 1 |
| hsa-miR-1185 | NM_001766 | CD1D | 1 |
| hsa-miR-1185 | NM_001766 | CD1D | 1 |
| hsa-miR-892a | NM_001766 | CD1D | 1 |
| hsa-miR-892a | NM_001766 | CD1D | 1 |
| hsa-miR-887- | NM_001766 | CD1D | 1 |
| hsa-miR-873- | NM_001766 | CD1D | 1 |
| hsa-miR-216b | NM_001766 | CD1D | 1 |
| hsa-miR-939- | NM_001766 | CD1D | 1 |
| hsa-miR-1178 | NM_001766 | CD1D | 1 |
| hsa-miR-1207 | NM_001766 | CD1D | 1 |
| hsa-miR-1291 | NM_001766 | CD1D | 1 |
| hsa-miR-1303 | NM_001766 | CD1D | 1 |
| hsa-miR-1244 | NM_001766 | CD1D | 1 |
| hsa-miR-1249 | NM_001766 | CD1D | 1 |
| hsa-miR-125C | NM_001766 | CD1D | 1 |
| hsa-miR-1251 | NM_001766 | CD1D | 1 |
| hsa-miR-1251 | NM_001766 | CD1D | 1 |
| hsa-miR-1265 | NM_001766 | CD1D | 1 |
| hsa-miR-1288 | NM_001766 | CD1D | 1 |
| hsa-miR-1909 | NM_001766 | CD1D | 1 |
| hsa-miR-1911 | NM_001766 | CD1D | 1 |
| hsa-miR-1912 | NM_001766 | CD1D | 1 |
| hsa-miR-2115 | NM_001766 | CD1D | 1 |
| hsa-miR-2117 | NM_001766 | CD1D | 1 |
| hsa-miR-2276 | NM_001766 | CD1D | 1 |
| hsa-miR-3121 | NM_001766 | CD1D | 1 |
| hsa-miR-3122 | NM_001766 | CD1D | 1 |
| hsa-miR-3125 | NM_001766 | CD1D | 1 |
| hsa-miR-3129 | NM_001766 | CD1D | 1 |
| hsa-miR-466  | NM_001766 | CD1D | 1 |
| hsa-miR-3162 | NM_001766 | CD1D | 1 |
| hsa-miR-3174 | NM_001766 | CD1D | 1 |
| hsa-miR-3179 | NM_001766 | CD1D | 1 |
| hsa-miR-3186 | NM_001766 | CD1D | 1 |
| hsa-miR-3187 | NM_001766 | CD1D | 1 |
| hsa-miR-3198 | NM_001766 | CD1D | 1 |
| hsa-miR-4302 | NM_001766 | CD1D | 1 |
| hsa-miR-4306 | NM_001766 | CD1D | 1 |
| hsa-miR-4314 | NM_001766 | CD1D | 1 |
| hsa-miR-4319 | NM_001766 | CD1D | 1 |

|              |           |      |   |
|--------------|-----------|------|---|
| hsa-miR-4259 | NM_001766 | CD1D | 1 |
| hsa-miR-4254 | NM_001766 | CD1D | 1 |
| hsa-miR-4326 | NM_001766 | CD1D | 1 |
| hsa-miR-4327 | NM_001766 | CD1D | 1 |
| hsa-miR-4268 | NM_001766 | CD1D | 1 |
| hsa-miR-4268 | NM_001766 | CD1D | 1 |
| hsa-miR-4278 | NM_001766 | CD1D | 1 |
| hsa-miR-4280 | NM_001766 | CD1D | 1 |
| hsa-miR-4287 | NM_001766 | CD1D | 1 |
| hsa-miR-4292 | NM_001766 | CD1D | 1 |
| hsa-miR-4330 | NM_001766 | CD1D | 1 |
| hsa-miR-3622 | NM_001766 | CD1D | 1 |
| hsa-miR-3655 | NM_001766 | CD1D | 1 |
| hsa-miR-3667 | NM_001766 | CD1D | 1 |
| hsa-miR-3675 | NM_001766 | CD1D | 1 |
| hsa-miR-3677 | NM_001766 | CD1D | 1 |
| hsa-miR-3678 | NM_001766 | CD1D | 1 |
| hsa-miR-3692 | NM_001766 | CD1D | 1 |
| hsa-miR-3692 | NM_001766 | CD1D | 1 |
| hsa-miR-3915 | NM_001766 | CD1D | 1 |
| hsa-miR-3927 | NM_001766 | CD1D | 1 |
| hsa-miR-3943 | NM_001766 | CD1D | 1 |
| hsa-miR-3945 | NM_001766 | CD1D | 1 |
| hsa-miR-1268 | NM_001766 | CD1D | 1 |
| hsa-miR-4420 | NM_001766 | CD1D | 1 |
| hsa-miR-4422 | NM_001766 | CD1D | 1 |
| hsa-miR-4462 | NM_001766 | CD1D | 1 |
| hsa-miR-4466 | NM_001766 | CD1D | 1 |
| hsa-miR-4469 | NM_001766 | CD1D | 1 |
| hsa-miR-4470 | NM_001766 | CD1D | 1 |
| hsa-miR-4478 | NM_001766 | CD1D | 1 |
| hsa-miR-4482 | NM_001766 | CD1D | 1 |
| hsa-miR-4494 | NM_001766 | CD1D | 1 |
| hsa-miR-4494 | NM_001766 | CD1D | 1 |
| hsa-miR-4496 | NM_001766 | CD1D | 1 |
| hsa-miR-4497 | NM_001766 | CD1D | 1 |
| hsa-miR-3973 | NM_001766 | CD1D | 1 |
| hsa-miR-4651 | NM_001766 | CD1D | 1 |
| hsa-miR-4655 | NM_001766 | CD1D | 1 |
| hsa-miR-4667 | NM_001766 | CD1D | 1 |
| hsa-miR-4669 | NM_001766 | CD1D | 1 |
| hsa-miR-4675 | NM_001766 | CD1D | 1 |
| hsa-miR-4690 | NM_001766 | CD1D | 1 |
| hsa-miR-4694 | NM_001766 | CD1D | 1 |
| hsa-miR-4697 | NM_001766 | CD1D | 1 |
| hsa-miR-4710 | NM_001766 | CD1D | 1 |
| hsa-miR-4713 | NM_001766 | CD1D | 1 |
| hsa-miR-4714 | NM_001766 | CD1D | 1 |
| hsa-miR-4723 | NM_001766 | CD1D | 1 |
| hsa-miR-4723 | NM_001766 | CD1D | 1 |
| hsa-miR-4725 | NM_001766 | CD1D | 1 |
| hsa-miR-4727 | NM_001766 | CD1D | 1 |
| hsa-miR-4755 | NM_001766 | CD1D | 1 |
| hsa-miR-4758 | NM_001766 | CD1D | 1 |
| hsa-miR-4769 | NM_001766 | CD1D | 1 |
| hsa-miR-4786 | NM_001766 | CD1D | 1 |
| hsa-miR-4797 | NM_001766 | CD1D | 1 |
| hsa-miR-4800 | NM_001766 | CD1D | 1 |
| hsa-miR-4804 | NM_001766 | CD1D | 1 |
| hsa-miR-5002 | NM_001766 | CD1D | 1 |
| hsa-miR-5008 | NM_001766 | CD1D | 1 |
| hsa-miR-5088 | NM_001766 | CD1D | 1 |
| hsa-miR-5190 | NM_001766 | CD1D | 1 |
| hsa-miR-5195 | NM_001766 | CD1D | 1 |
| hsa-miR-5196 | NM_001766 | CD1D | 1 |
| hsa-miR-4524 | NM_001766 | CD1D | 1 |
| hsa-miR-664t | NM_001766 | CD1D | 1 |
| hsa-miR-5580 | NM_001766 | CD1D | 1 |
| hsa-miR-5588 | NM_001766 | CD1D | 1 |
| hsa-miR-5591 | NM_001766 | CD1D | 1 |
| hsa-miR-5681 | NM_001766 | CD1D | 1 |
| hsa-miR-5698 | NM_001766 | CD1D | 1 |
| hsa-miR-5699 | NM_001766 | CD1D | 1 |
| hsa-miR-6080 | NM_001766 | CD1D | 1 |
| hsa-miR-6088 | NM_001766 | CD1D | 1 |
| hsa-miR-6129 | NM_001766 | CD1D | 1 |
| hsa-miR-6133 | NM_001766 | CD1D | 1 |
| hsa-miR-6500 | NM_001766 | CD1D | 1 |
| hsa-miR-6503 | NM_001766 | CD1D | 1 |
| hsa-miR-6506 | NM_001766 | CD1D | 1 |
| hsa-miR-6507 | NM_001766 | CD1D | 1 |
| hsa-miR-6515 | NM_001766 | CD1D | 1 |
| hsa-miR-6715 | NM_001766 | CD1D | 1 |
| hsa-miR-892c | NM_001766 | CD1D | 1 |
| hsa-miR-6726 | NM_001766 | CD1D | 1 |
| hsa-miR-6728 | NM_001766 | CD1D | 1 |
| hsa-miR-6733 | NM_001766 | CD1D | 1 |
| hsa-miR-6734 | NM_001766 | CD1D | 1 |
| hsa-miR-6735 | NM_001766 | CD1D | 1 |
| hsa-miR-6737 | NM_001766 | CD1D | 1 |
| hsa-miR-6740 | NM_001766 | CD1D | 1 |
| hsa-miR-6749 | NM_001766 | CD1D | 1 |
| hsa-miR-6754 | NM_001766 | CD1D | 1 |
| hsa-miR-6756 | NM_001766 | CD1D | 1 |

|                         |      |            |
|-------------------------|------|------------|
| hsa-miR-6758 NM_001766  | CD1D | 1          |
| hsa-miR-6755 NM_001766  | CD1D | 1          |
| hsa-miR-6764 NM_001766  | CD1D | 1          |
| hsa-miR-6778 NM_001766  | CD1D | 1          |
| hsa-miR-6781 NM_001766  | CD1D | 1          |
| hsa-miR-6785 NM_001766  | CD1D | 1          |
| hsa-miR-6786 NM_001766  | CD1D | 1          |
| hsa-miR-6788 NM_001766  | CD1D | 1          |
| hsa-miR-6788 NM_001766  | CD1D | 1          |
| hsa-miR-6790 NM_001766  | CD1D | 1          |
| hsa-miR-6794 NM_001766  | CD1D | 1          |
| hsa-miR-6794 NM_001766  | CD1D | 1          |
| hsa-miR-6795 NM_001766  | CD1D | 1          |
| hsa-miR-6796 NM_001766  | CD1D | 1          |
| hsa-miR-6797 NM_001766  | CD1D | 1          |
| hsa-miR-6797 NM_001766  | CD1D | 1          |
| hsa-miR-6805 NM_001766  | CD1D | 1          |
| hsa-miR-6813 NM_001766  | CD1D | 1          |
| hsa-miR-6817 NM_001766  | CD1D | 1          |
| hsa-miR-6822 NM_001766  | CD1D | 1          |
| hsa-miR-6823 NM_001766  | CD1D | 1          |
| hsa-miR-6823 NM_001766  | CD1D | 1          |
| hsa-miR-6826 NM_001766  | CD1D | 1          |
| hsa-miR-6827 NM_001766  | CD1D | 1          |
| hsa-miR-6833 NM_001766  | CD1D | 1          |
| hsa-miR-6838 NM_001766  | CD1D | 1          |
| hsa-miR-6846 NM_001766  | CD1D | 1          |
| hsa-miR-6846 NM_001766  | CD1D | 1          |
| hsa-miR-6849 NM_001766  | CD1D | 1          |
| hsa-miR-6852 NM_001766  | CD1D | 1          |
| hsa-miR-6855 NM_001766  | CD1D | 1          |
| hsa-miR-6855 NM_001766  | CD1D | 1          |
| hsa-miR-6856 NM_001766  | CD1D | 1          |
| hsa-miR-6866 NM_001766  | CD1D | 1          |
| hsa-miR-6870 NM_001766  | CD1D | 1          |
| hsa-miR-6873 NM_001766  | CD1D | 1          |
| hsa-miR-6875 NM_001766  | CD1D | 1          |
| hsa-miR-6875 NM_001766  | CD1D | 1          |
| hsa-miR-6876 NM_001766  | CD1D | 1          |
| hsa-miR-6877 NM_001766  | CD1D | 1          |
| hsa-miR-6882 NM_001766  | CD1D | 1          |
| hsa-miR-6883 NM_001766  | CD1D | 1          |
| hsa-miR-6883 NM_001766  | CD1D | 1          |
| hsa-miR-6883 NM_001766  | CD1D | 1          |
| hsa-miR-6886 NM_001766  | CD1D | 1          |
| hsa-miR-6887 NM_001766  | CD1D | 1          |
| hsa-miR-6889 NM_001766  | CD1D | 1          |
| hsa-miR-6890 NM_001766  | CD1D | 1          |
| hsa-miR-6893 NM_001766  | CD1D | 1          |
| hsa-miR-6894 NM_001766  | CD1D | 1          |
| hsa-miR-6894 NM_001766  | CD1D | 1          |
| hsa-miR-7106 NM_001766  | CD1D | 1          |
| hsa-miR-7110 NM_001766  | CD1D | 1          |
| hsa-miR-7155 NM_001766  | CD1D | 1          |
| hsa-miR-7160 NM_001766  | CD1D | 1          |
| hsa-miR-6516 NM_001766  | CD1D | 1          |
| hsa-miR-7850 NM_001766  | CD1D | 1          |
| hsa-miR-7850 NM_001766  | CD1D | 1          |
| hsa-miR-7851 NM_001766  | CD1D | 1          |
| hsa-miR-8058 NM_001766  | CD1D | 1          |
| hsa-miR-8065 NM_001766  | CD1D | 1          |
| hsa-miR-8077 NM_001766  | CD1D | 1          |
| hsa-miR-8081 NM_001766  | CD1D | 1          |
| hsa-miR-8083 NM_001766  | CD1D | 1          |
| hsa-miR-1843 NM_001766  | CD1D | 1          |
| hsa-miR-1039 NM_001766  | CD1D | 1          |
| hsa-miR-1211 NM_001766  | CD1D | 1          |
| hsa-miR-1211 NM_001766  | CD1D | 1          |
| hsa-miR-1212 NM_001766  | CD1D | 1          |
| hsa-miR-6819 NM_012472  | LRR6 | 0.95384615 |
| hsa-miR-328-1 NM_012472 | LRR6 | 0.95604396 |
| hsa-miR-3132 NM_012472  | LRR6 | 0.95604396 |
| hsa-miR-4271 NM_012472  | LRR6 | 0.95604396 |
| hsa-miR-4534 NM_012472  | LRR6 | 0.95604396 |
| hsa-miR-4646 NM_012472  | LRR6 | 0.95604396 |
| hsa-miR-4651 NM_012472  | LRR6 | 0.95604396 |
| hsa-miR-4706 NM_012472  | LRR6 | 0.95604396 |
| hsa-miR-5739 NM_012472  | LRR6 | 0.95604396 |
| hsa-miR-6090 NM_012472  | LRR6 | 0.95604396 |
| hsa-miR-6127 NM_012472  | LRR6 | 0.95604396 |
| hsa-miR-6738 NM_012472  | LRR6 | 0.95604396 |
| hsa-miR-6746 NM_012472  | LRR6 | 0.95604396 |
| hsa-miR-6758 NM_012472  | LRR6 | 0.95604396 |
| hsa-miR-6765 NM_012472  | LRR6 | 0.95604396 |
| hsa-miR-6782 NM_012472  | LRR6 | 0.95604396 |
| hsa-miR-6795 NM_012472  | LRR6 | 0.95604396 |
| hsa-miR-6797 NM_012472  | LRR6 | 0.95604396 |
| hsa-miR-6803 NM_012472  | LRR6 | 0.95604396 |
| hsa-miR-6769 NM_012472  | LRR6 | 0.95604396 |
| hsa-miR-6870 NM_012472  | LRR6 | 0.95604396 |
| hsa-miR-6870 NM_012472  | LRR6 | 0.95604396 |
| hsa-miR-6875 NM_012472  | LRR6 | 0.95604396 |
| hsa-miR-6891 NM_012472  | LRR6 | 0.95604396 |
| hsa-miR-6894 NM_012472  | LRR6 | 0.95604396 |
| hsa-miR-7111 NM_012472  | LRR6 | 0.95604396 |



|               |           |       |            |
|---------------|-----------|-------|------------|
| hsa-miR-4433  | NM_012472 | LRRC6 | 0.95604396 |
| hsa-miR-7847  | NM_012472 | LRRC6 | 0.95604396 |
| hsa-miR-8072  | NM_012472 | LRRC6 | 0.95604396 |
| hsa-miR-1211  | NM_012472 | LRRC6 | 0.95604396 |
| hsa-miR-23a-  | NM_012472 | LRRC6 | 0.96153846 |
| hsa-miR-92b-  | NM_012472 | LRRC6 | 0.96153846 |
| hsa-miR-596   | NM_012472 | LRRC6 | 0.96153846 |
| hsa-miR-604   | NM_012472 | LRRC6 | 0.96153846 |
| hsa-miR-933   | NM_012472 | LRRC6 | 0.96153846 |
| hsa-miR-1307  | NM_012472 | LRRC6 | 0.96153846 |
| hsa-miR-3157  | NM_012472 | LRRC6 | 0.96153846 |
| hsa-miR-3161  | NM_012472 | LRRC6 | 0.96153846 |
| hsa-miR-3192  | NM_012472 | LRRC6 | 0.96153846 |
| hsa-miR-1268  | NM_012472 | LRRC6 | 0.96153846 |
| hsa-miR-4462  | NM_012472 | LRRC6 | 0.96153846 |
| hsa-miR-4469  | NM_012472 | LRRC6 | 0.96153846 |
| hsa-miR-4498  | NM_012472 | LRRC6 | 0.96153846 |
| hsa-miR-2467  | NM_012472 | LRRC6 | 0.96153846 |
| hsa-miR-5088  | NM_012472 | LRRC6 | 0.96153846 |
| hsa-miR-5695  | NM_012472 | LRRC6 | 0.96153846 |
| hsa-miR-6725  | NM_012472 | LRRC6 | 0.96153846 |
| hsa-miR-6738  | NM_012472 | LRRC6 | 0.96153846 |
| hsa-miR-6771  | NM_012472 | LRRC6 | 0.96153846 |
| hsa-miR-6776  | NM_012472 | LRRC6 | 0.96153846 |
| hsa-miR-6789  | NM_012472 | LRRC6 | 0.96153846 |
| hsa-miR-6809  | NM_012472 | LRRC6 | 0.96153846 |
| hsa-miR-6831  | NM_012472 | LRRC6 | 0.96153846 |
| hsa-miR-7845  | NM_012472 | LRRC6 | 0.96153846 |
| hsa-miR-8085  | NM_012472 | LRRC6 | 0.96153846 |
| hsa-miR-6529  | NM_012472 | LRRC6 | 0.96153846 |
| hsa-miR-383-  | NM_012472 | LRRC6 | 0.96703297 |
| hsa-miR-6085  | NM_012472 | LRRC6 | 0.96923077 |
| hsa-miR-3194  | NM_012472 | LRRC6 | 0.97435897 |
| hsa-miR-452C  | NM_012472 | LRRC6 | 0.97435897 |
| hsa-miR-4739  | NM_012472 | LRRC6 | 0.97435897 |
| hsa-miR-676C  | NM_012472 | LRRC6 | 0.97435897 |
| hsa-miR-6838  | NM_012472 | LRRC6 | 0.97435897 |
| hsa-miR-6857  | NM_012472 | LRRC6 | 0.97435897 |
| hsa-miR-197-  | NM_012472 | LRRC6 | 0.98076923 |
| hsa-miR-6124  | NM_012472 | LRRC6 | 0.98076923 |
| hsa-miR-1211  | NM_012472 | LRRC6 | 0.98076923 |
| hsa-miR-6507  | NM_012472 | LRRC6 | 0.98717949 |
| hsa-let-7b-5p | NM_012472 | LRRC6 | 1          |
| hsa-let-7c-5p | NM_012472 | LRRC6 | 1          |
| hsa-let-7e-5p | NM_012472 | LRRC6 | 1          |
| hsa-let-7f-5p | NM_012472 | LRRC6 | 1          |
| hsa-miR-18a-  | NM_012472 | LRRC6 | 1          |
| hsa-miR-24-1- | NM_012472 | LRRC6 | 1          |
| hsa-miR-25-5j | NM_012472 | LRRC6 | 1          |
| hsa-miR-26b-  | NM_012472 | LRRC6 | 1          |
| hsa-miR-27a-  | NM_012472 | LRRC6 | 1          |
| hsa-miR-29a-  | NM_012472 | LRRC6 | 1          |
| hsa-miR-32-5j | NM_012472 | LRRC6 | 1          |
| hsa-miR-93-5j | NM_012472 | LRRC6 | 1          |
| hsa-miR-103a  | NM_012472 | LRRC6 | 1          |
| hsa-miR-103a  | NM_012472 | LRRC6 | 1          |
| hsa-miR-103a  | NM_012472 | LRRC6 | 1          |
| hsa-miR-103a  | NM_012472 | LRRC6 | 1          |
| hsa-miR-107   | NM_012472 | LRRC6 | 1          |
| hsa-miR-197-  | NM_012472 | LRRC6 | 1          |
| hsa-miR-30c-  | NM_012472 | LRRC6 | 1          |
| hsa-miR-139-  | NM_012472 | LRRC6 | 1          |
| hsa-miR-181c  | NM_012472 | LRRC6 | 1          |
| hsa-miR-204-  | NM_012472 | LRRC6 | 1          |
| hsa-miR-211-  | NM_012472 | LRRC6 | 1          |
| hsa-miR-181a  | NM_012472 | LRRC6 | 1          |
| hsa-miR-218-  | NM_012472 | LRRC6 | 1          |
| hsa-miR-224-  | NM_012472 | LRRC6 | 1          |
| hsa-miR-200b  | NM_012472 | LRRC6 | 1          |
| hsa-let-7i-5p | NM_012472 | LRRC6 | 1          |
| hsa-miR-130a  | NM_012472 | LRRC6 | 1          |
| hsa-miR-138-  | NM_012472 | LRRC6 | 1          |
| hsa-miR-145-  | NM_012472 | LRRC6 | 1          |
| hsa-miR-127-  | NM_012472 | LRRC6 | 1          |
| hsa-miR-127-  | NM_012472 | LRRC6 | 1          |
| hsa-miR-134-  | NM_012472 | LRRC6 | 1          |
| hsa-miR-149-  | NM_012472 | LRRC6 | 1          |
| hsa-miR-149-  | NM_012472 | LRRC6 | 1          |
| hsa-miR-149-  | NM_012472 | LRRC6 | 1          |
| hsa-miR-154-  | NM_012472 | LRRC6 | 1          |
| hsa-miR-185-  | NM_012472 | LRRC6 | 1          |
| hsa-miR-155-  | NM_012472 | LRRC6 | 1          |
| hsa-miR-128-  | NM_012472 | LRRC6 | 1          |
| hsa-miR-106b  | NM_012472 | LRRC6 | 1          |
| hsa-miR-30c-  | NM_012472 | LRRC6 | 1          |
| hsa-miR-219a  | NM_012472 | LRRC6 | 1          |
| hsa-miR-34c-  | NM_012472 | LRRC6 | 1          |
| hsa-miR-296-  | NM_012472 | LRRC6 | 1          |
| hsa-miR-130b  | NM_012472 | LRRC6 | 1          |
| hsa-miR-363-  | NM_012472 | LRRC6 | 1          |
| hsa-miR-365b  | NM_012472 | LRRC6 | 1          |
| hsa-miR-380-  | NM_012472 | LRRC6 | 1          |
| hsa-miR-330-  | NM_012472 | LRRC6 | 1          |
| hsa-miR-422a  | NM_012472 | LRRC6 | 1          |

|              |           |       |   |
|--------------|-----------|-------|---|
| hsa-miR-423- | NM_012472 | LRRC6 | 1 |
| hsa-miR-424- | NM_012472 | LRRC6 | 1 |
| hsa-miR-412- | NM_012472 | LRRC6 | 1 |
| hsa-miR-486- | NM_012472 | LRRC6 | 1 |
| hsa-miR-486- | NM_012472 | LRRC6 | 1 |
| hsa-miR-490- | NM_012472 | LRRC6 | 1 |
| hsa-miR-493- | NM_012472 | LRRC6 | 1 |
| hsa-miR-526a | NM_012472 | LRRC6 | 1 |
| hsa-miR-517a | NM_012472 | LRRC6 | 1 |
| hsa-miR-517b | NM_012472 | LRRC6 | 1 |
| hsa-miR-516b | NM_012472 | LRRC6 | 1 |
| hsa-miR-516b | NM_012472 | LRRC6 | 1 |
| hsa-miR-518e | NM_012472 | LRRC6 | 1 |
| hsa-miR-518a | NM_012472 | LRRC6 | 1 |
| hsa-miR-516a | NM_012472 | LRRC6 | 1 |
| hsa-miR-499a | NM_012472 | LRRC6 | 1 |
| hsa-miR-500a | NM_012472 | LRRC6 | 1 |
| hsa-miR-501- | NM_012472 | LRRC6 | 1 |
| hsa-miR-504- | NM_012472 | LRRC6 | 1 |
| hsa-miR-504- | NM_012472 | LRRC6 | 1 |
| hsa-miR-514a | NM_012472 | LRRC6 | 1 |
| hsa-miR-564  | NM_012472 | LRRC6 | 1 |
| hsa-miR-570- | NM_012472 | LRRC6 | 1 |
| hsa-miR-574- | NM_012472 | LRRC6 | 1 |
| hsa-miR-593- | NM_012472 | LRRC6 | 1 |
| hsa-miR-597- | NM_012472 | LRRC6 | 1 |
| hsa-miR-630  | NM_012472 | LRRC6 | 1 |
| hsa-miR-642a | NM_012472 | LRRC6 | 1 |
| hsa-miR-652- | NM_012472 | LRRC6 | 1 |
| hsa-miR-652- | NM_012472 | LRRC6 | 1 |
| hsa-miR-653- | NM_012472 | LRRC6 | 1 |
| hsa-miR-1264 | NM_012472 | LRRC6 | 1 |
| hsa-miR-671- | NM_012472 | LRRC6 | 1 |
| hsa-miR-671- | NM_012472 | LRRC6 | 1 |
| hsa-miR-671- | NM_012472 | LRRC6 | 1 |
| hsa-miR-767- | NM_012472 | LRRC6 | 1 |
| hsa-miR-151b | NM_012472 | LRRC6 | 1 |
| hsa-miR-1296 | NM_012472 | LRRC6 | 1 |
| hsa-miR-1271 | NM_012472 | LRRC6 | 1 |
| hsa-miR-769- | NM_012472 | LRRC6 | 1 |
| hsa-miR-769- | NM_012472 | LRRC6 | 1 |
| hsa-miR-762  | NM_012472 | LRRC6 | 1 |
| hsa-miR-670- | NM_012472 | LRRC6 | 1 |
| hsa-miR-765  | NM_012472 | LRRC6 | 1 |
| hsa-miR-541- | NM_012472 | LRRC6 | 1 |
| hsa-miR-744- | NM_012472 | LRRC6 | 1 |
| hsa-miR-877- | NM_012472 | LRRC6 | 1 |
| hsa-miR-887- | NM_012472 | LRRC6 | 1 |
| hsa-miR-665  | NM_012472 | LRRC6 | 1 |
| hsa-miR-216b | NM_012472 | LRRC6 | 1 |
| hsa-miR-920  | NM_012472 | LRRC6 | 1 |
| hsa-miR-922  | NM_012472 | LRRC6 | 1 |
| hsa-miR-936  | NM_012472 | LRRC6 | 1 |
| hsa-miR-936  | NM_012472 | LRRC6 | 1 |
| hsa-miR-937- | NM_012472 | LRRC6 | 1 |
| hsa-miR-937- | NM_012472 | LRRC6 | 1 |
| hsa-miR-937- | NM_012472 | LRRC6 | 1 |
| hsa-miR-939- | NM_012472 | LRRC6 | 1 |
| hsa-miR-939- | NM_012472 | LRRC6 | 1 |
| hsa-miR-1225 | NM_012472 | LRRC6 | 1 |
| hsa-miR-1237 | NM_012472 | LRRC6 | 1 |
| hsa-miR-1285 | NM_012472 | LRRC6 | 1 |
| hsa-miR-1291 | NM_012472 | LRRC6 | 1 |
| hsa-miR-1294 | NM_012472 | LRRC6 | 1 |
| hsa-miR-1303 | NM_012472 | LRRC6 | 1 |
| hsa-miR-1248 | NM_012472 | LRRC6 | 1 |
| hsa-miR-1249 | NM_012472 | LRRC6 | 1 |
| hsa-miR-1249 | NM_012472 | LRRC6 | 1 |
| hsa-miR-1275 | NM_012472 | LRRC6 | 1 |
| hsa-miR-1281 | NM_012472 | LRRC6 | 1 |
| hsa-miR-1288 | NM_012472 | LRRC6 | 1 |
| hsa-miR-103b | NM_012472 | LRRC6 | 1 |
| hsa-miR-1825 | NM_012472 | LRRC6 | 1 |
| hsa-miR-1911 | NM_012472 | LRRC6 | 1 |
| hsa-miR-1914 | NM_012472 | LRRC6 | 1 |
| hsa-miR-2110 | NM_012472 | LRRC6 | 1 |
| hsa-miR-2276 | NM_012472 | LRRC6 | 1 |
| hsa-miR-711  | NM_012472 | LRRC6 | 1 |
| hsa-miR-718  | NM_012472 | LRRC6 | 1 |
| hsa-miR-3126 | NM_012472 | LRRC6 | 1 |
| hsa-miR-3127 | NM_012472 | LRRC6 | 1 |
| hsa-miR-3130 | NM_012472 | LRRC6 | 1 |
| hsa-miR-378b | NM_012472 | LRRC6 | 1 |
| hsa-miR-544b | NM_012472 | LRRC6 | 1 |
| hsa-miR-3141 | NM_012472 | LRRC6 | 1 |
| hsa-miR-3142 | NM_012472 | LRRC6 | 1 |
| hsa-miR-3147 | NM_012472 | LRRC6 | 1 |
| hsa-miR-3147 | NM_012472 | LRRC6 | 1 |
| hsa-miR-3147 | NM_012472 | LRRC6 | 1 |
| hsa-miR-3152 | NM_012472 | LRRC6 | 1 |
| hsa-miR-3153 | NM_012472 | LRRC6 | 1 |
| hsa-miR-3074 | NM_012472 | LRRC6 | 1 |
| hsa-miR-3157 | NM_012472 | LRRC6 | 1 |
| hsa-miR-3157 | NM_012472 | LRRC6 | 1 |

|                        |       |   |
|------------------------|-------|---|
| hsa-miR-3158 NM_012472 | LRRC6 | 1 |
| hsa-miR-3158 NM_012472 | LRRC6 | 1 |
| hsa-miR-3160 NM_012472 | LRRC6 | 1 |
| hsa-miR-3162 NM_012472 | LRRC6 | 1 |
| hsa-miR-1260 NM_012472 | LRRC6 | 1 |
| hsa-miR-3170 NM_012472 | LRRC6 | 1 |
| hsa-miR-1193 NM_012472 | LRRC6 | 1 |
| hsa-miR-323b NM_012472 | LRRC6 | 1 |
| hsa-miR-3178 NM_012472 | LRRC6 | 1 |
| hsa-miR-3180 NM_012472 | LRRC6 | 1 |
| hsa-miR-3184 NM_012472 | LRRC6 | 1 |
| hsa-miR-3186 NM_012472 | LRRC6 | 1 |
| hsa-miR-3188 NM_012472 | LRRC6 | 1 |
| hsa-miR-3190 NM_012472 | LRRC6 | 1 |
| hsa-miR-3192 NM_012472 | LRRC6 | 1 |
| hsa-miR-3194 NM_012472 | LRRC6 | 1 |
| hsa-miR-3200 NM_012472 | LRRC6 | 1 |
| hsa-miR-3200 NM_012472 | LRRC6 | 1 |
| hsa-miR-3200 NM_012472 | LRRC6 | 1 |
| hsa-miR-3202 NM_012472 | LRRC6 | 1 |
| hsa-miR-4298 NM_012472 | LRRC6 | 1 |
| hsa-miR-4298 NM_012472 | LRRC6 | 1 |
| hsa-miR-4300 NM_012472 | LRRC6 | 1 |
| hsa-miR-4312 NM_012472 | LRRC6 | 1 |
| hsa-miR-4252 NM_012472 | LRRC6 | 1 |
| hsa-miR-4271 NM_012472 | LRRC6 | 1 |
| hsa-miR-4277 NM_012472 | LRRC6 | 1 |
| hsa-miR-4278 NM_012472 | LRRC6 | 1 |
| hsa-miR-4283 NM_012472 | LRRC6 | 1 |
| hsa-miR-4287 NM_012472 | LRRC6 | 1 |
| hsa-miR-4290 NM_012472 | LRRC6 | 1 |
| hsa-miR-4328 NM_012472 | LRRC6 | 1 |
| hsa-miR-3605 NM_012472 | LRRC6 | 1 |
| hsa-miR-3615 NM_012472 | LRRC6 | 1 |
| hsa-miR-3651 NM_012472 | LRRC6 | 1 |
| hsa-miR-3654 NM_012472 | LRRC6 | 1 |
| hsa-miR-3665 NM_012472 | LRRC6 | 1 |
| hsa-miR-3665 NM_012472 | LRRC6 | 1 |
| hsa-miR-3667 NM_012472 | LRRC6 | 1 |
| hsa-miR-3677 NM_012472 | LRRC6 | 1 |
| hsa-miR-3681 NM_012472 | LRRC6 | 1 |
| hsa-miR-3682 NM_012472 | LRRC6 | 1 |
| hsa-miR-3690 NM_012472 | LRRC6 | 1 |
| hsa-miR-3928 NM_012472 | LRRC6 | 1 |
| hsa-miR-3944 NM_012472 | LRRC6 | 1 |
| hsa-miR-642b NM_012472 | LRRC6 | 1 |
| hsa-miR-550b NM_012472 | LRRC6 | 1 |
| hsa-miR-550b NM_012472 | LRRC6 | 1 |
| hsa-miR-4421 NM_012472 | LRRC6 | 1 |
| hsa-miR-4423 NM_012472 | LRRC6 | 1 |
| hsa-miR-4430 NM_012472 | LRRC6 | 1 |
| hsa-miR-4430 NM_012472 | LRRC6 | 1 |
| hsa-miR-4433 NM_012472 | LRRC6 | 1 |
| hsa-miR-4433 NM_012472 | LRRC6 | 1 |
| hsa-miR-4437 NM_012472 | LRRC6 | 1 |
| hsa-miR-4438 NM_012472 | LRRC6 | 1 |
| hsa-miR-4440 NM_012472 | LRRC6 | 1 |
| hsa-miR-4442 NM_012472 | LRRC6 | 1 |
| hsa-miR-4446 NM_012472 | LRRC6 | 1 |
| hsa-miR-4451 NM_012472 | LRRC6 | 1 |
| hsa-miR-4454 NM_012472 | LRRC6 | 1 |
| hsa-miR-4458 NM_012472 | LRRC6 | 1 |
| hsa-miR-4458 NM_012472 | LRRC6 | 1 |
| hsa-miR-378h NM_012472 | LRRC6 | 1 |
| hsa-miR-548a NM_012472 | LRRC6 | 1 |
| hsa-miR-4466 NM_012472 | LRRC6 | 1 |
| hsa-miR-4474 NM_012472 | LRRC6 | 1 |
| hsa-miR-3689 NM_012472 | LRRC6 | 1 |
| hsa-miR-4489 NM_012472 | LRRC6 | 1 |
| hsa-miR-4492 NM_012472 | LRRC6 | 1 |
| hsa-miR-2392 NM_012472 | LRRC6 | 1 |
| hsa-miR-4512 NM_012472 | LRRC6 | 1 |
| hsa-miR-4515 NM_012472 | LRRC6 | 1 |
| hsa-miR-4516 NM_012472 | LRRC6 | 1 |
| hsa-miR-4524 NM_012472 | LRRC6 | 1 |
| hsa-miR-4534 NM_012472 | LRRC6 | 1 |
| hsa-miR-4535 NM_012472 | LRRC6 | 1 |
| hsa-miR-1587 NM_012472 | LRRC6 | 1 |
| hsa-miR-1587 NM_012472 | LRRC6 | 1 |
| hsa-miR-3978 NM_012472 | LRRC6 | 1 |
| hsa-miR-4639 NM_012472 | LRRC6 | 1 |
| hsa-miR-4644 NM_012472 | LRRC6 | 1 |
| hsa-miR-4646 NM_012472 | LRRC6 | 1 |
| hsa-miR-4649 NM_012472 | LRRC6 | 1 |
| hsa-miR-4649 NM_012472 | LRRC6 | 1 |
| hsa-miR-4650 NM_012472 | LRRC6 | 1 |
| hsa-miR-4652 NM_012472 | LRRC6 | 1 |
| hsa-miR-4652 NM_012472 | LRRC6 | 1 |
| hsa-miR-4653 NM_012472 | LRRC6 | 1 |
| hsa-miR-4655 NM_012472 | LRRC6 | 1 |
| hsa-miR-4667 NM_012472 | LRRC6 | 1 |
| hsa-miR-4667 NM_012472 | LRRC6 | 1 |
| hsa-miR-4683 NM_012472 | LRRC6 | 1 |
| hsa-miR-4687 NM_012472 | LRRC6 | 1 |





|                          |       |            |
|--------------------------|-------|------------|
| hsa-miR-8064 NM_012472   | LRRC6 | 1          |
| hsa-miR-8075 NM_012472   | LRRC6 | 1          |
| hsa-miR-8082 NM_012472   | LRRC6 | 1          |
| hsa-miR-8085 NM_012472   | LRRC6 | 1          |
| hsa-miR-1035 NM_012472   | LRRC6 | 1          |
| hsa-miR-104C NM_012472   | LRRC6 | 1          |
| hsa-miR-104C NM_012472   | LRRC6 | 1          |
| hsa-miR-1118 NM_012472   | LRRC6 | 1          |
| hsa-miR-6525 NM_012472   | LRRC6 | 1          |
| hsa-miR-1211 NM_012472   | LRRC6 | 1          |
| hsa-miR-1212 NM_012472   | LRRC6 | 1          |
| hsa-miR-4646 NM_014312   | VSIG2 | 0.96153846 |
| hsa-miR-6891 NM_014312   | VSIG2 | 0.96153846 |
| hsa-miR-3055 NM_014312   | VSIG2 | 0.96153846 |
| hsa-miR-431- NM_0013299  | VSIG2 | 0.96153846 |
| hsa-miR-3194 NM_0013299  | VSIG2 | 0.96153846 |
| hsa-miR-3935 NM_0013299  | VSIG2 | 0.96153846 |
| hsa-miR-5572 NM_0013299  | VSIG2 | 0.96153846 |
| hsa-miR-7162 NM_0013299  | VSIG2 | 0.96153846 |
| hsa-miR-1237 NM_014312   | VSIG2 | 0.97435897 |
| hsa-miR-4667 NM_014312   | VSIG2 | 0.97435897 |
| hsa-miR-5193 NM_014312   | VSIG2 | 0.97435897 |
| hsa-miR-5581 NM_014312   | VSIG2 | 0.97435897 |
| hsa-miR-185- NM_0013299  | VSIG2 | 0.97435897 |
| hsa-miR-6726 NM_0013299  | VSIG2 | 0.97802198 |
| hsa-miR-129- NM_014312   | VSIG2 | 1          |
| hsa-miR-181b NM_014312   | VSIG2 | 1          |
| hsa-miR-133a NM_014312   | VSIG2 | 1          |
| hsa-miR-129- NM_014312   | VSIG2 | 1          |
| hsa-miR-324- NM_014312   | VSIG2 | 1          |
| hsa-miR-133b NM_014312   | VSIG2 | 1          |
| hsa-miR-376b NM_014312   | VSIG2 | 1          |
| hsa-miR-675- NM_014312   | VSIG2 | 1          |
| hsa-miR-943 NM_014312    | VSIG2 | 1          |
| hsa-miR-1304 NM_014312   | VSIG2 | 1          |
| hsa-miR-1288 NM_014312   | VSIG2 | 1          |
| hsa-miR-4268 NM_014312   | VSIG2 | 1          |
| hsa-miR-4632 NM_014312   | VSIG2 | 1          |
| hsa-miR-6761 NM_014312   | VSIG2 | 1          |
| hsa-miR-6796 NM_014312   | VSIG2 | 1          |
| hsa-miR-6798 NM_014312   | VSIG2 | 1          |
| hsa-miR-6883 NM_014312   | VSIG2 | 1          |
| hsa-miR-7113 NM_014312   | VSIG2 | 1          |
| hsa-miR-15a- NM_0013299  | VSIG2 | 1          |
| hsa-miR-93-3j NM_0013299 | VSIG2 | 1          |
| hsa-miR-224- NM_0013299  | VSIG2 | 1          |
| hsa-miR-365a NM_0013299  | VSIG2 | 1          |
| hsa-miR-365b NM_0013299  | VSIG2 | 1          |
| hsa-miR-371a NM_0013299  | VSIG2 | 1          |
| hsa-miR-328- NM_0013299  | VSIG2 | 1          |
| hsa-miR-338- NM_0013299  | VSIG2 | 1          |
| hsa-miR-511- NM_0013299  | VSIG2 | 1          |
| hsa-miR-202- NM_0013299  | VSIG2 | 1          |
| hsa-miR-432- NM_0013299  | VSIG2 | 1          |
| hsa-miR-518a NM_0013299  | VSIG2 | 1          |
| hsa-miR-527 NM_0013299   | VSIG2 | 1          |
| hsa-miR-558 NM_0013299   | VSIG2 | 1          |
| hsa-miR-550a NM_0013299  | VSIG2 | 1          |
| hsa-miR-550a NM_0013299  | VSIG2 | 1          |
| hsa-miR-621 NM_0013299   | VSIG2 | 1          |
| hsa-miR-33b- NM_0013299  | VSIG2 | 1          |
| hsa-miR-647 NM_0013299   | VSIG2 | 1          |
| hsa-miR-654- NM_0013299  | VSIG2 | 1          |
| hsa-miR-1468 NM_0013299  | VSIG2 | 1          |
| hsa-miR-374b NM_0013299  | VSIG2 | 1          |
| hsa-miR-941 NM_0013299   | VSIG2 | 1          |
| hsa-miR-942- NM_0013299  | VSIG2 | 1          |
| hsa-miR-1228 NM_0013299  | VSIG2 | 1          |
| hsa-miR-1225 NM_0013299  | VSIG2 | 1          |
| hsa-miR-1238 NM_0013299  | VSIG2 | 1          |
| hsa-miR-1251 NM_0013299  | VSIG2 | 1          |
| hsa-miR-1281 NM_0013299  | VSIG2 | 1          |
| hsa-miR-1470 NM_0013299  | VSIG2 | 1          |
| hsa-miR-1913 NM_0013299  | VSIG2 | 1          |
| hsa-miR-1976 NM_0013299  | VSIG2 | 1          |
| hsa-miR-2277 NM_0013299  | VSIG2 | 1          |
| hsa-miR-718 NM_0013299   | VSIG2 | 1          |
| hsa-miR-3166 NM_0013299  | VSIG2 | 1          |
| hsa-miR-3190 NM_0013299  | VSIG2 | 1          |
| hsa-miR-4252 NM_0013299  | VSIG2 | 1          |
| hsa-miR-4326 NM_0013299  | VSIG2 | 1          |
| hsa-miR-4290 NM_0013299  | VSIG2 | 1          |
| hsa-miR-3681 NM_0013299  | VSIG2 | 1          |
| hsa-miR-4485 NM_0013299  | VSIG2 | 1          |
| hsa-miR-4493 NM_0013299  | VSIG2 | 1          |
| hsa-miR-4525 NM_0013299  | VSIG2 | 1          |
| hsa-miR-4534 NM_0013299  | VSIG2 | 1          |
| hsa-miR-4632 NM_0013299  | VSIG2 | 1          |
| hsa-miR-4646 NM_0013299  | VSIG2 | 1          |
| hsa-miR-4650 NM_0013299  | VSIG2 | 1          |
| hsa-miR-4653 NM_0013299  | VSIG2 | 1          |

|                               |            |
|-------------------------------|------------|
| hsa-miR-4667 NM_0013299 VSIG2 | 1          |
| hsa-miR-4667 NM_0013299 VSIG2 | 1          |
| hsa-miR-4716 NM_0013299 VSIG2 | 1          |
| hsa-miR-4723 NM_0013299 VSIG2 | 1          |
| hsa-miR-4728 NM_0013299 VSIG2 | 1          |
| hsa-miR-4749 NM_0013299 VSIG2 | 1          |
| hsa-miR-4753 NM_0013299 VSIG2 | 1          |
| hsa-miR-4778 NM_0013299 VSIG2 | 1          |
| hsa-miR-5004 NM_0013299 VSIG2 | 1          |
| hsa-miR-501C NM_0013299 VSIG2 | 1          |
| hsa-miR-5092 NM_0013299 VSIG2 | 1          |
| hsa-miR-5587 NM_0013299 VSIG2 | 1          |
| hsa-miR-6069 NM_0013299 VSIG2 | 1          |
| hsa-miR-609C NM_0013299 VSIG2 | 1          |
| hsa-miR-6134 NM_0013299 VSIG2 | 1          |
| hsa-miR-6508 NM_0013299 VSIG2 | 1          |
| hsa-miR-6509 NM_0013299 VSIG2 | 1          |
| hsa-miR-6512 NM_0013299 VSIG2 | 1          |
| hsa-miR-6515 NM_0013299 VSIG2 | 1          |
| hsa-miR-6728 NM_0013299 VSIG2 | 1          |
| hsa-miR-6729 NM_0013299 VSIG2 | 1          |
| hsa-miR-6732 NM_0013299 VSIG2 | 1          |
| hsa-miR-6749 NM_0013299 VSIG2 | 1          |
| hsa-miR-675C NM_0013299 VSIG2 | 1          |
| hsa-miR-6751 NM_0013299 VSIG2 | 1          |
| hsa-miR-6752 NM_0013299 VSIG2 | 1          |
| hsa-miR-6754 NM_0013299 VSIG2 | 1          |
| hsa-miR-6758 NM_0013299 VSIG2 | 1          |
| hsa-miR-6762 NM_0013299 VSIG2 | 1          |
| hsa-miR-6768 NM_0013299 VSIG2 | 1          |
| hsa-miR-6772 NM_0013299 VSIG2 | 1          |
| hsa-miR-6773 NM_0013299 VSIG2 | 1          |
| hsa-miR-6775 NM_0013299 VSIG2 | 1          |
| hsa-miR-6779 NM_0013299 VSIG2 | 1          |
| hsa-miR-6779 NM_0013299 VSIG2 | 1          |
| hsa-miR-6781 NM_0013299 VSIG2 | 1          |
| hsa-miR-6787 NM_0013299 VSIG2 | 1          |
| hsa-miR-6789 NM_0013299 VSIG2 | 1          |
| hsa-miR-6796 NM_0013299 VSIG2 | 1          |
| hsa-miR-680C NM_0013299 VSIG2 | 1          |
| hsa-miR-6814 NM_0013299 VSIG2 | 1          |
| hsa-miR-6815 NM_0013299 VSIG2 | 1          |
| hsa-miR-6818 NM_0013299 VSIG2 | 1          |
| hsa-miR-6827 NM_0013299 VSIG2 | 1          |
| hsa-miR-6832 NM_0013299 VSIG2 | 1          |
| hsa-miR-6849 NM_0013299 VSIG2 | 1          |
| hsa-miR-6857 NM_0013299 VSIG2 | 1          |
| hsa-miR-6865 NM_0013299 VSIG2 | 1          |
| hsa-miR-6867 NM_0013299 VSIG2 | 1          |
| hsa-miR-687C NM_0013299 VSIG2 | 1          |
| hsa-miR-6879 NM_0013299 VSIG2 | 1          |
| hsa-miR-6881 NM_0013299 VSIG2 | 1          |
| hsa-miR-6885 NM_0013299 VSIG2 | 1          |
| hsa-miR-6891 NM_0013299 VSIG2 | 1          |
| hsa-miR-7111 NM_0013299 VSIG2 | 1          |
| hsa-miR-7112 NM_0013299 VSIG2 | 1          |
| hsa-miR-7974 NM_0013299 VSIG2 | 1          |
| hsa-miR-808C NM_0013299 VSIG2 | 1          |
| hsa-miR-8089 NM_0013299 VSIG2 | 1          |
| hsa-miR-104C NM_0013299 VSIG2 | 1          |
| hsa-miR-3059 NM_0013299 VSIG2 | 1          |
| hsa-miR-3198 NM_138451 IQCD   | 0.98076923 |
| hsa-miR-3198 NM_0013304 IQCD  | 0.98076923 |
| hsa-miR-26b- NM_138451 IQCD   | 1          |
| hsa-miR-204- NM_138451 IQCD   | 1          |
| hsa-miR-125a NM_138451 IQCD   | 1          |
| hsa-miR-365t NM_138451 IQCD   | 1          |
| hsa-miR-330- NM_138451 IQCD   | 1          |
| hsa-miR-520e NM_138451 IQCD   | 1          |
| hsa-miR-520d NM_138451 IQCD   | 1          |
| hsa-miR-4507 NM_138451 IQCD   | 1          |
| hsa-miR-4653 NM_138451 IQCD   | 1          |
| hsa-miR-4673 NM_138451 IQCD   | 1          |
| hsa-miR-4677 NM_138451 IQCD   | 1          |
| hsa-miR-4685 NM_138451 IQCD   | 1          |
| hsa-miR-4746 NM_138451 IQCD   | 1          |
| hsa-miR-4747 NM_138451 IQCD   | 1          |
| hsa-miR-4767 NM_138451 IQCD   | 1          |
| hsa-miR-5004 NM_138451 IQCD   | 1          |
| hsa-miR-5006 NM_138451 IQCD   | 1          |
| hsa-miR-5196 NM_138451 IQCD   | 1          |
| hsa-miR-6776 NM_138451 IQCD   | 1          |
| hsa-miR-6782 NM_138451 IQCD   | 1          |
| hsa-miR-6796 NM_138451 IQCD   | 1          |
| hsa-miR-6823 NM_138451 IQCD   | 1          |
| hsa-miR-687C NM_138451 IQCD   | 1          |
| hsa-miR-6883 NM_138451 IQCD   | 1          |
| hsa-miR-7151 NM_138451 IQCD   | 1          |
| hsa-miR-716C NM_138451 IQCD   | 1          |
| hsa-miR-7849 NM_138451 IQCD   | 1          |
| hsa-miR-8081 NM_138451 IQCD   | 1          |
| hsa-miR-1118 NM_138451 IQCD   | 1          |
| hsa-miR-1211 NM_138451 IQCD   | 1          |
| hsa-miR-26b- NM_0013304 IQCD  | 1          |

|               |            |       |            |
|---------------|------------|-------|------------|
| hsa-miR-204-  | NM_0013304 | IQCD  | 1          |
| hsa-miR-125a  | NM_0013304 | IQCD  | 1          |
| hsa-miR-365t  | NM_0013304 | IQCD  | 1          |
| hsa-miR-520e  | NM_0013304 | IQCD  | 1          |
| hsa-miR-520d  | NM_0013304 | IQCD  | 1          |
| hsa-miR-4507  | NM_0013304 | IQCD  | 1          |
| hsa-miR-4653  | NM_0013304 | IQCD  | 1          |
| hsa-miR-4673  | NM_0013304 | IQCD  | 1          |
| hsa-miR-4677  | NM_0013304 | IQCD  | 1          |
| hsa-miR-4685  | NM_0013304 | IQCD  | 1          |
| hsa-miR-4746  | NM_0013304 | IQCD  | 1          |
| hsa-miR-4747  | NM_0013304 | IQCD  | 1          |
| hsa-miR-4767  | NM_0013304 | IQCD  | 1          |
| hsa-miR-5004  | NM_0013304 | IQCD  | 1          |
| hsa-miR-5006  | NM_0013304 | IQCD  | 1          |
| hsa-miR-5196  | NM_0013304 | IQCD  | 1          |
| hsa-miR-6776  | NM_0013304 | IQCD  | 1          |
| hsa-miR-6782  | NM_0013304 | IQCD  | 1          |
| hsa-miR-6796  | NM_0013304 | IQCD  | 1          |
| hsa-miR-6823  | NM_0013304 | IQCD  | 1          |
| hsa-miR-6857  | NM_0013304 | IQCD  | 1          |
| hsa-miR-6870  | NM_0013304 | IQCD  | 1          |
| hsa-miR-6883  | NM_0013304 | IQCD  | 1          |
| hsa-miR-7151  | NM_0013304 | IQCD  | 1          |
| hsa-miR-7160  | NM_0013304 | IQCD  | 1          |
| hsa-miR-7849  | NM_0013304 | IQCD  | 1          |
| hsa-miR-8081  | NM_0013304 | IQCD  | 1          |
| hsa-miR-1118  | NM_0013304 | IQCD  | 1          |
| hsa-miR-1211  | NM_0013304 | IQCD  | 1          |
| hsa-miR-152-  | NM_033071  | SYNE1 | 0.96153846 |
| hsa-miR-3187  | NM_033071  | SYNE1 | 0.96153846 |
| hsa-miR-152-  | NM_182961  | SYNE1 | 0.96153846 |
| hsa-miR-512-  | NM_182961  | SYNE1 | 0.96153846 |
| hsa-miR-3187  | NM_182961  | SYNE1 | 0.96153846 |
| hsa-miR-133a  | NM_0013477 | SYNE1 | 0.96153846 |
| hsa-miR-152-  | NM_0013477 | SYNE1 | 0.96153846 |
| hsa-miR-133b  | NM_0013477 | SYNE1 | 0.96153846 |
| hsa-miR-608   | NM_0013477 | SYNE1 | 0.96153846 |
| hsa-miR-615-  | NM_0013477 | SYNE1 | 0.96153846 |
| hsa-miR-1248  | NM_0013477 | SYNE1 | 0.96153846 |
| hsa-miR-6734  | NM_0013477 | SYNE1 | 0.96153846 |
| hsa-miR-7160  | NM_0013477 | SYNE1 | 0.96153846 |
| hsa-miR-558   | NM_0013477 | SYNE1 | 0.97435897 |
| hsa-miR-6131  | NM_0013477 | SYNE1 | 0.97435897 |
| hsa-miR-425-  | NM_033071  | SYNE1 | 1          |
| hsa-miR-520f  | NM_033071  | SYNE1 | 1          |
| hsa-miR-3198  | NM_033071  | SYNE1 | 1          |
| hsa-miR-425g  | NM_033071  | SYNE1 | 1          |
| hsa-miR-3610  | NM_033071  | SYNE1 | 1          |
| hsa-miR-4496  | NM_033071  | SYNE1 | 1          |
| hsa-miR-4495  | NM_033071  | SYNE1 | 1          |
| hsa-miR-4533  | NM_033071  | SYNE1 | 1          |
| hsa-miR-4667  | NM_033071  | SYNE1 | 1          |
| hsa-miR-4704  | NM_033071  | SYNE1 | 1          |
| hsa-miR-4776  | NM_033071  | SYNE1 | 1          |
| hsa-miR-6716  | NM_033071  | SYNE1 | 1          |
| hsa-miR-6806  | NM_033071  | SYNE1 | 1          |
| hsa-miR-7160  | NM_033071  | SYNE1 | 1          |
| hsa-miR-7847  | NM_033071  | SYNE1 | 1          |
| hsa-let-7g-5p | NM_182961  | SYNE1 | 1          |
| hsa-miR-15b-  | NM_182961  | SYNE1 | 1          |
| hsa-miR-497-  | NM_182961  | SYNE1 | 1          |
| hsa-miR-642a  | NM_182961  | SYNE1 | 1          |
| hsa-miR-758-  | NM_182961  | SYNE1 | 1          |
| hsa-miR-513b  | NM_182961  | SYNE1 | 1          |
| hsa-miR-3198  | NM_182961  | SYNE1 | 1          |
| hsa-miR-4496  | NM_182961  | SYNE1 | 1          |
| hsa-miR-4495  | NM_182961  | SYNE1 | 1          |
| hsa-miR-4725  | NM_182961  | SYNE1 | 1          |
| hsa-miR-5695  | NM_182961  | SYNE1 | 1          |
| hsa-miR-5706  | NM_182961  | SYNE1 | 1          |
| hsa-miR-6081  | NM_182961  | SYNE1 | 1          |
| hsa-miR-6755  | NM_182961  | SYNE1 | 1          |
| hsa-miR-6785  | NM_182961  | SYNE1 | 1          |
| hsa-miR-6883  | NM_182961  | SYNE1 | 1          |
| hsa-miR-7160  | NM_182961  | SYNE1 | 1          |
| hsa-miR-7847  | NM_182961  | SYNE1 | 1          |
| hsa-miR-22-3j | NM_0013477 | SYNE1 | 1          |
| hsa-miR-191-  | NM_0013477 | SYNE1 | 1          |
| hsa-miR-486-  | NM_0013477 | SYNE1 | 1          |
| hsa-miR-493-  | NM_0013477 | SYNE1 | 1          |
| hsa-miR-181d  | NM_0013477 | SYNE1 | 1          |
| hsa-miR-519d  | NM_0013477 | SYNE1 | 1          |
| hsa-miR-767-  | NM_0013477 | SYNE1 | 1          |
| hsa-miR-509-  | NM_0013477 | SYNE1 | 1          |
| hsa-miR-939-  | NM_0013477 | SYNE1 | 1          |
| hsa-miR-1237  | NM_0013477 | SYNE1 | 1          |
| hsa-miR-3156  | NM_0013477 | SYNE1 | 1          |
| hsa-miR-3610  | NM_0013477 | SYNE1 | 1          |
| hsa-miR-4471  | NM_0013477 | SYNE1 | 1          |
| hsa-miR-4495  | NM_0013477 | SYNE1 | 1          |
| hsa-miR-4525  | NM_0013477 | SYNE1 | 1          |
| hsa-miR-4533  | NM_0013477 | SYNE1 | 1          |
| hsa-miR-4776  | NM_0013477 | SYNE1 | 1          |



|                                |            |
|--------------------------------|------------|
| hsa-miR-4802 NM_0013477 SYNE1  | 1          |
| hsa-miR-5695 NM_0013477 SYNE1  | 1          |
| hsa-miR-6069 NM_0013477 SYNE1  | 1          |
| hsa-miR-6505 NM_0013477 SYNE1  | 1          |
| hsa-miR-6857 NM_0013477 SYNE1  | 1          |
| hsa-miR-6883 NM_0013477 SYNE1  | 1          |
| hsa-miR-7843 NM_0013477 SYNE1  | 1          |
| hsa-miR-7851 NM_0013477 SYNE1  | 1          |
| hsa-miR-9718 NM_0013477 SYNE1  | 1          |
| hsa-miR-9851 NM_0013477 SYNE1  | 1          |
| hsa-miR-128-: NM_177980 CDH26  | 0.96153846 |
| hsa-miR-1226 NM_177980 CDH26   | 0.96153846 |
| hsa-miR-6802 NM_177980 CDH26   | 0.96153846 |
| hsa-miR-128-: NM_021810 CDH26  | 0.96153846 |
| hsa-miR-1226 NM_021810 CDH26   | 0.96153846 |
| hsa-miR-3122 NM_021810 CDH26   | 0.96153846 |
| hsa-miR-6802 NM_021810 CDH26   | 0.96153846 |
| hsa-miR-6851 NM_021810 CDH26   | 0.96153846 |
| hsa-miR-128-: NM_0013482 CDH26 | 0.96153846 |
| hsa-miR-1226 NM_0013482 CDH26  | 0.96153846 |
| hsa-miR-3122 NM_0013482 CDH26  | 0.96153846 |
| hsa-miR-6134 NM_0013482 CDH26  | 0.96153846 |
| hsa-miR-6802 NM_0013482 CDH26  | 0.96153846 |
| hsa-miR-6851 NM_0013482 CDH26  | 0.96153846 |
| hsa-miR-6817 NM_177980 CDH26   | 0.96923077 |
| hsa-miR-6817 NM_021810 CDH26   | 0.96923077 |
| hsa-miR-1915 NM_0013482 CDH26  | 0.96923077 |
| hsa-miR-6817 NM_0013482 CDH26  | 0.96923077 |
| hsa-miR-9851 NM_177980 CDH26   | 0.97435897 |
| hsa-miR-9851 NM_021810 CDH26   | 0.97435897 |
| hsa-miR-9851 NM_0013482 CDH26  | 0.97435897 |
| hsa-miR-760 NM_177980 CDH26    | 0.97435897 |
| hsa-miR-760 NM_021810 CDH26    | 0.97435897 |
| hsa-miR-449c NM_0013482 CDH26  | 0.97435897 |
| hsa-miR-760 NM_0013482 CDH26   | 0.97435897 |
| hsa-miR-92a- NM_177980 CDH26   | 0.98076923 |
| hsa-miR-3151 NM_177980 CDH26   | 0.98076923 |
| hsa-miR-6133 NM_177980 CDH26   | 0.98076923 |
| hsa-miR-92a- NM_021810 CDH26   | 0.98076923 |
| hsa-miR-3151 NM_021810 CDH26   | 0.98076923 |
| hsa-miR-6133 NM_021810 CDH26   | 0.98076923 |
| hsa-miR-6881 NM_021810 CDH26   | 0.98076923 |
| hsa-miR-92a- NM_0013482 CDH26  | 0.98076923 |
| hsa-miR-3151 NM_0013482 CDH26  | 0.98076923 |
| hsa-miR-6133 NM_0013482 CDH26  | 0.98076923 |
| hsa-miR-6881 NM_0013482 CDH26  | 0.98076923 |
| hsa-let-7e-5p NM_177980 CDH26  | 1          |
| hsa-miR-105-: NM_177980 CDH26  | 1          |
| hsa-miR-30b-: NM_177980 CDH26  | 1          |
| hsa-miR-30b-: NM_177980 CDH26  | 1          |
| hsa-miR-125t NM_177980 CDH26   | 1          |
| hsa-miR-149-: NM_177980 CDH26  | 1          |
| hsa-miR-320a NM_177980 CDH26   | 1          |
| hsa-miR-219a NM_177980 CDH26   | 1          |
| hsa-miR-130t NM_177980 CDH26   | 1          |
| hsa-miR-365t NM_177980 CDH26   | 1          |
| hsa-miR-365t NM_177980 CDH26   | 1          |
| hsa-miR-376a NM_177980 CDH26   | 1          |
| hsa-miR-383-: NM_177980 CDH26  | 1          |
| hsa-miR-483-: NM_177980 CDH26  | 1          |
| hsa-miR-491-: NM_177980 CDH26  | 1          |
| hsa-miR-202-: NM_177980 CDH26  | 1          |
| hsa-miR-512-: NM_177980 CDH26  | 1          |
| hsa-miR-520e NM_177980 CDH26   | 1          |
| hsa-miR-526t NM_177980 CDH26   | 1          |
| hsa-miR-518t NM_177980 CDH26   | 1          |
| hsa-miR-504-: NM_177980 CDH26  | 1          |
| hsa-miR-509-: NM_177980 CDH26  | 1          |
| hsa-miR-514a NM_177980 CDH26   | 1          |
| hsa-miR-590-: NM_177980 CDH26  | 1          |
| hsa-miR-614 NM_177980 CDH26    | 1          |
| hsa-miR-625-: NM_177980 CDH26  | 1          |
| hsa-miR-630 NM_177980 CDH26    | 1          |
| hsa-miR-1224 NM_177980 CDH26   | 1          |
| hsa-miR-320t NM_177980 CDH26   | 1          |
| hsa-miR-320c NM_177980 CDH26   | 1          |
| hsa-miR-765 NM_177980 CDH26    | 1          |
| hsa-miR-936 NM_177980 CDH26    | 1          |
| hsa-miR-938 NM_177980 CDH26    | 1          |
| hsa-miR-1183 NM_177980 CDH26   | 1          |
| hsa-miR-1247 NM_177980 CDH26   | 1          |
| hsa-miR-1249 NM_177980 CDH26   | 1          |
| hsa-miR-1275 NM_177980 CDH26   | 1          |
| hsa-miR-1282 NM_177980 CDH26   | 1          |
| hsa-miR-1288 NM_177980 CDH26   | 1          |
| hsa-miR-2277 NM_177980 CDH26   | 1          |
| hsa-miR-3125 NM_177980 CDH26   | 1          |
| hsa-miR-3130 NM_177980 CDH26   | 1          |
| hsa-miR-3131 NM_177980 CDH26   | 1          |
| hsa-miR-378t NM_177980 CDH26   | 1          |
| hsa-miR-3137 NM_177980 CDH26   | 1          |
| hsa-miR-3141 NM_177980 CDH26   | 1          |
| hsa-miR-3146 NM_177980 CDH26   | 1          |
| hsa-miR-3150 NM_177980 CDH26   | 1          |

|                        |       |   |
|------------------------|-------|---|
| hsa-miR-3152 NM_177980 | CDH26 | 1 |
| hsa-miR-3153 NM_177980 | CDH26 | 1 |
| hsa-miR-3153 NM_177980 | CDH26 | 1 |
| hsa-miR-323b NM_177980 | CDH26 | 1 |
| hsa-miR-3188 NM_177980 | CDH26 | 1 |
| hsa-miR-3189 NM_177980 | CDH26 | 1 |
| hsa-miR-320e NM_177980 | CDH26 | 1 |
| hsa-miR-4303 NM_177980 | CDH26 | 1 |
| hsa-miR-4324 NM_177980 | CDH26 | 1 |
| hsa-miR-4271 NM_177980 | CDH26 | 1 |
| hsa-miR-3605 NM_177980 | CDH26 | 1 |
| hsa-miR-3614 NM_177980 | CDH26 | 1 |
| hsa-miR-3661 NM_177980 | CDH26 | 1 |
| hsa-miR-3661 NM_177980 | CDH26 | 1 |
| hsa-miR-3685 NM_177980 | CDH26 | 1 |
| hsa-miR-3921 NM_177980 | CDH26 | 1 |
| hsa-miR-3945 NM_177980 | CDH26 | 1 |
| hsa-miR-4425 NM_177980 | CDH26 | 1 |
| hsa-miR-4436 NM_177980 | CDH26 | 1 |
| hsa-miR-4451 NM_177980 | CDH26 | 1 |
| hsa-miR-447C NM_177980 | CDH26 | 1 |
| hsa-miR-4474 NM_177980 | CDH26 | 1 |
| hsa-miR-4475 NM_177980 | CDH26 | 1 |
| hsa-miR-4478 NM_177980 | CDH26 | 1 |
| hsa-miR-3689 NM_177980 | CDH26 | 1 |
| hsa-miR-448C NM_177980 | CDH26 | 1 |
| hsa-miR-4497 NM_177980 | CDH26 | 1 |
| hsa-miR-4505 NM_177980 | CDH26 | 1 |
| hsa-miR-4507 NM_177980 | CDH26 | 1 |
| hsa-miR-452C NM_177980 | CDH26 | 1 |
| hsa-miR-4638 NM_177980 | CDH26 | 1 |
| hsa-miR-4651 NM_177980 | CDH26 | 1 |
| hsa-miR-4665 NM_177980 | CDH26 | 1 |
| hsa-miR-4667 NM_177980 | CDH26 | 1 |
| hsa-miR-4674 NM_177980 | CDH26 | 1 |
| hsa-miR-4697 NM_177980 | CDH26 | 1 |
| hsa-miR-4704 NM_177980 | CDH26 | 1 |
| hsa-miR-4704 NM_177980 | CDH26 | 1 |
| hsa-miR-4732 NM_177980 | CDH26 | 1 |
| hsa-miR-474C NM_177980 | CDH26 | 1 |
| hsa-miR-4747 NM_177980 | CDH26 | 1 |
| hsa-miR-4748 NM_177980 | CDH26 | 1 |
| hsa-miR-4751 NM_177980 | CDH26 | 1 |
| hsa-miR-4755 NM_177980 | CDH26 | 1 |
| hsa-miR-478C NM_177980 | CDH26 | 1 |
| hsa-miR-4781 NM_177980 | CDH26 | 1 |
| hsa-miR-4788 NM_177980 | CDH26 | 1 |
| hsa-miR-4789 NM_177980 | CDH26 | 1 |
| hsa-miR-5004 NM_177980 | CDH26 | 1 |
| hsa-miR-5006 NM_177980 | CDH26 | 1 |
| hsa-miR-501C NM_177980 | CDH26 | 1 |
| hsa-miR-5588 NM_177980 | CDH26 | 1 |
| hsa-miR-6124 NM_177980 | CDH26 | 1 |
| hsa-miR-6165 NM_177980 | CDH26 | 1 |
| hsa-miR-6505 NM_177980 | CDH26 | 1 |
| hsa-miR-6509 NM_177980 | CDH26 | 1 |
| hsa-miR-6716 NM_177980 | CDH26 | 1 |
| hsa-miR-6727 NM_177980 | CDH26 | 1 |
| hsa-miR-6728 NM_177980 | CDH26 | 1 |
| hsa-miR-6735 NM_177980 | CDH26 | 1 |
| hsa-miR-6741 NM_177980 | CDH26 | 1 |
| hsa-miR-6744 NM_177980 | CDH26 | 1 |
| hsa-miR-6747 NM_177980 | CDH26 | 1 |
| hsa-miR-6753 NM_177980 | CDH26 | 1 |
| hsa-miR-676C NM_177980 | CDH26 | 1 |
| hsa-miR-6763 NM_177980 | CDH26 | 1 |
| hsa-miR-6772 NM_177980 | CDH26 | 1 |
| hsa-miR-6788 NM_177980 | CDH26 | 1 |
| hsa-miR-6791 NM_177980 | CDH26 | 1 |
| hsa-miR-6795 NM_177980 | CDH26 | 1 |
| hsa-miR-6801 NM_177980 | CDH26 | 1 |
| hsa-miR-6812 NM_177980 | CDH26 | 1 |
| hsa-miR-6812 NM_177980 | CDH26 | 1 |
| hsa-miR-6834 NM_177980 | CDH26 | 1 |
| hsa-miR-6845 NM_177980 | CDH26 | 1 |
| hsa-miR-6845 NM_177980 | CDH26 | 1 |
| hsa-miR-6851 NM_177980 | CDH26 | 1 |
| hsa-miR-6769 NM_177980 | CDH26 | 1 |
| hsa-miR-6862 NM_177980 | CDH26 | 1 |
| hsa-miR-687C NM_177980 | CDH26 | 1 |
| hsa-miR-6873 NM_177980 | CDH26 | 1 |
| hsa-miR-6877 NM_177980 | CDH26 | 1 |
| hsa-miR-688C NM_177980 | CDH26 | 1 |
| hsa-miR-6881 NM_177980 | CDH26 | 1 |
| hsa-miR-6891 NM_177980 | CDH26 | 1 |
| hsa-miR-6894 NM_177980 | CDH26 | 1 |
| hsa-miR-7111 NM_177980 | CDH26 | 1 |
| hsa-miR-7154 NM_177980 | CDH26 | 1 |
| hsa-miR-7156 NM_177980 | CDH26 | 1 |
| hsa-miR-7162 NM_177980 | CDH26 | 1 |
| hsa-miR-7847 NM_177980 | CDH26 | 1 |
| hsa-miR-7848 NM_177980 | CDH26 | 1 |
| hsa-miR-7854 NM_177980 | CDH26 | 1 |
| hsa-miR-7854 NM_177980 | CDH26 | 1 |
| hsa-miR-8057 NM_177980 | CDH26 | 1 |

|               |           |       |   |
|---------------|-----------|-------|---|
| hsa-miR-8089  | NM_177980 | CDH26 | 1 |
| hsa-miR-9718  | NM_177980 | CDH26 | 1 |
| hsa-miR-1039  | NM_177980 | CDH26 | 1 |
| hsa-miR-114C  | NM_177980 | CDH26 | 1 |
| hsa-miR-6529  | NM_177980 | CDH26 | 1 |
| hsa-let-7e-5p | NM_021810 | CDH26 | 1 |
| hsa-let-7e-3p | NM_021810 | CDH26 | 1 |
| hsa-miR-22-5j | NM_021810 | CDH26 | 1 |
| hsa-miR-25-5j | NM_021810 | CDH26 | 1 |
| hsa-miR-96-5j | NM_021810 | CDH26 | 1 |
| hsa-miR-105-  | NM_021810 | CDH26 | 1 |
| hsa-miR-139-  | NM_021810 | CDH26 | 1 |
| hsa-miR-183-  | NM_021810 | CDH26 | 1 |
| hsa-miR-216a  | NM_021810 | CDH26 | 1 |
| hsa-miR-30b-  | NM_021810 | CDH26 | 1 |
| hsa-miR-30b-  | NM_021810 | CDH26 | 1 |
| hsa-miR-125t  | NM_021810 | CDH26 | 1 |
| hsa-miR-149-  | NM_021810 | CDH26 | 1 |
| hsa-miR-320a  | NM_021810 | CDH26 | 1 |
| hsa-miR-219a  | NM_021810 | CDH26 | 1 |
| hsa-miR-130b  | NM_021810 | CDH26 | 1 |
| hsa-miR-365t  | NM_021810 | CDH26 | 1 |
| hsa-miR-365t  | NM_021810 | CDH26 | 1 |
| hsa-miR-376a  | NM_021810 | CDH26 | 1 |
| hsa-miR-377-  | NM_021810 | CDH26 | 1 |
| hsa-miR-381-  | NM_021810 | CDH26 | 1 |
| hsa-miR-383-  | NM_021810 | CDH26 | 1 |
| hsa-miR-330-  | NM_021810 | CDH26 | 1 |
| hsa-miR-324-  | NM_021810 | CDH26 | 1 |
| hsa-miR-483-  | NM_021810 | CDH26 | 1 |
| hsa-miR-491-  | NM_021810 | CDH26 | 1 |
| hsa-miR-202-  | NM_021810 | CDH26 | 1 |
| hsa-miR-512-  | NM_021810 | CDH26 | 1 |
| hsa-miR-520e  | NM_021810 | CDH26 | 1 |
| hsa-miR-526t  | NM_021810 | CDH26 | 1 |
| hsa-miR-518t  | NM_021810 | CDH26 | 1 |
| hsa-miR-500a  | NM_021810 | CDH26 | 1 |
| hsa-miR-503-  | NM_021810 | CDH26 | 1 |
| hsa-miR-504-  | NM_021810 | CDH26 | 1 |
| hsa-miR-509-  | NM_021810 | CDH26 | 1 |
| hsa-miR-92b-  | NM_021810 | CDH26 | 1 |
| hsa-miR-590-  | NM_021810 | CDH26 | 1 |
| hsa-miR-614   | NM_021810 | CDH26 | 1 |
| hsa-miR-625-  | NM_021810 | CDH26 | 1 |
| hsa-miR-630   | NM_021810 | CDH26 | 1 |
| hsa-miR-1224  | NM_021810 | CDH26 | 1 |
| hsa-miR-320b  | NM_021810 | CDH26 | 1 |
| hsa-miR-320c  | NM_021810 | CDH26 | 1 |
| hsa-miR-1271  | NM_021810 | CDH26 | 1 |
| hsa-miR-1301  | NM_021810 | CDH26 | 1 |
| hsa-miR-765   | NM_021810 | CDH26 | 1 |
| hsa-miR-675-  | NM_021810 | CDH26 | 1 |
| hsa-miR-675-  | NM_021810 | CDH26 | 1 |
| hsa-miR-887-  | NM_021810 | CDH26 | 1 |
| hsa-miR-760   | NM_021810 | CDH26 | 1 |
| hsa-miR-936   | NM_021810 | CDH26 | 1 |
| hsa-miR-938   | NM_021810 | CDH26 | 1 |
| hsa-miR-1183  | NM_021810 | CDH26 | 1 |
| hsa-miR-1183  | NM_021810 | CDH26 | 1 |
| hsa-miR-1249  | NM_021810 | CDH26 | 1 |
| hsa-miR-127C  | NM_021810 | CDH26 | 1 |
| hsa-miR-1275  | NM_021810 | CDH26 | 1 |
| hsa-miR-1282  | NM_021810 | CDH26 | 1 |
| hsa-miR-1288  | NM_021810 | CDH26 | 1 |
| hsa-miR-1909  | NM_021810 | CDH26 | 1 |
| hsa-miR-2277  | NM_021810 | CDH26 | 1 |
| hsa-miR-3116  | NM_021810 | CDH26 | 1 |
| hsa-miR-3125  | NM_021810 | CDH26 | 1 |
| hsa-miR-313C  | NM_021810 | CDH26 | 1 |
| hsa-miR-3131  | NM_021810 | CDH26 | 1 |
| hsa-miR-378t  | NM_021810 | CDH26 | 1 |
| hsa-miR-3137  | NM_021810 | CDH26 | 1 |
| hsa-miR-3146  | NM_021810 | CDH26 | 1 |
| hsa-miR-315C  | NM_021810 | CDH26 | 1 |
| hsa-miR-3151  | NM_021810 | CDH26 | 1 |
| hsa-miR-3152  | NM_021810 | CDH26 | 1 |
| hsa-miR-3153  | NM_021810 | CDH26 | 1 |
| hsa-miR-3153  | NM_021810 | CDH26 | 1 |
| hsa-miR-3154  | NM_021810 | CDH26 | 1 |
| hsa-miR-3155  | NM_021810 | CDH26 | 1 |
| hsa-miR-323t  | NM_021810 | CDH26 | 1 |
| hsa-miR-3188  | NM_021810 | CDH26 | 1 |
| hsa-miR-3189  | NM_021810 | CDH26 | 1 |
| hsa-miR-320e  | NM_021810 | CDH26 | 1 |
| hsa-miR-4303  | NM_021810 | CDH26 | 1 |
| hsa-miR-4324  | NM_021810 | CDH26 | 1 |
| hsa-miR-4271  | NM_021810 | CDH26 | 1 |
| hsa-miR-3605  | NM_021810 | CDH26 | 1 |
| hsa-miR-3614  | NM_021810 | CDH26 | 1 |
| hsa-miR-3619  | NM_021810 | CDH26 | 1 |
| hsa-miR-3661  | NM_021810 | CDH26 | 1 |
| hsa-miR-3661  | NM_021810 | CDH26 | 1 |
| hsa-miR-367C  | NM_021810 | CDH26 | 1 |
| hsa-miR-3692  | NM_021810 | CDH26 | 1 |

|              |           |       |   |
|--------------|-----------|-------|---|
| hsa-miR-3689 | NM_021810 | CDH26 | 1 |
| hsa-miR-3921 | NM_021810 | CDH26 | 1 |
| hsa-miR-3929 | NM_021810 | CDH26 | 1 |
| hsa-miR-3945 | NM_021810 | CDH26 | 1 |
| hsa-miR-642b | NM_021810 | CDH26 | 1 |
| hsa-miR-1268 | NM_021810 | CDH26 | 1 |
| hsa-miR-4423 | NM_021810 | CDH26 | 1 |
| hsa-miR-4429 | NM_021810 | CDH26 | 1 |
| hsa-miR-4433 | NM_021810 | CDH26 | 1 |
| hsa-miR-4436 | NM_021810 | CDH26 | 1 |
| hsa-miR-4451 | NM_021810 | CDH26 | 1 |
| hsa-miR-4474 | NM_021810 | CDH26 | 1 |
| hsa-miR-4475 | NM_021810 | CDH26 | 1 |
| hsa-miR-4478 | NM_021810 | CDH26 | 1 |
| hsa-miR-4478 | NM_021810 | CDH26 | 1 |
| hsa-miR-3689 | NM_021810 | CDH26 | 1 |
| hsa-miR-4480 | NM_021810 | CDH26 | 1 |
| hsa-miR-4494 | NM_021810 | CDH26 | 1 |
| hsa-miR-4494 | NM_021810 | CDH26 | 1 |
| hsa-miR-4497 | NM_021810 | CDH26 | 1 |
| hsa-miR-4505 | NM_021810 | CDH26 | 1 |
| hsa-miR-4506 | NM_021810 | CDH26 | 1 |
| hsa-miR-4507 | NM_021810 | CDH26 | 1 |
| hsa-miR-4520 | NM_021810 | CDH26 | 1 |
| hsa-miR-1587 | NM_021810 | CDH26 | 1 |
| hsa-miR-4638 | NM_021810 | CDH26 | 1 |
| hsa-miR-4638 | NM_021810 | CDH26 | 1 |
| hsa-miR-4650 | NM_021810 | CDH26 | 1 |
| hsa-miR-4651 | NM_021810 | CDH26 | 1 |
| hsa-miR-4665 | NM_021810 | CDH26 | 1 |
| hsa-miR-4665 | NM_021810 | CDH26 | 1 |
| hsa-miR-4673 | NM_021810 | CDH26 | 1 |
| hsa-miR-4674 | NM_021810 | CDH26 | 1 |
| hsa-miR-4676 | NM_021810 | CDH26 | 1 |
| hsa-miR-4676 | NM_021810 | CDH26 | 1 |
| hsa-miR-4687 | NM_021810 | CDH26 | 1 |
| hsa-miR-4688 | NM_021810 | CDH26 | 1 |
| hsa-miR-4697 | NM_021810 | CDH26 | 1 |
| hsa-miR-4704 | NM_021810 | CDH26 | 1 |
| hsa-miR-4704 | NM_021810 | CDH26 | 1 |
| hsa-miR-3529 | NM_021810 | CDH26 | 1 |
| hsa-miR-4725 | NM_021810 | CDH26 | 1 |
| hsa-miR-4732 | NM_021810 | CDH26 | 1 |
| hsa-miR-4740 | NM_021810 | CDH26 | 1 |
| hsa-miR-4747 | NM_021810 | CDH26 | 1 |
| hsa-miR-4747 | NM_021810 | CDH26 | 1 |
| hsa-miR-4748 | NM_021810 | CDH26 | 1 |
| hsa-miR-4751 | NM_021810 | CDH26 | 1 |
| hsa-miR-4755 | NM_021810 | CDH26 | 1 |
| hsa-miR-4761 | NM_021810 | CDH26 | 1 |
| hsa-miR-4765 | NM_021810 | CDH26 | 1 |
| hsa-miR-4780 | NM_021810 | CDH26 | 1 |
| hsa-miR-4781 | NM_021810 | CDH26 | 1 |
| hsa-miR-4788 | NM_021810 | CDH26 | 1 |
| hsa-miR-4789 | NM_021810 | CDH26 | 1 |
| hsa-miR-5004 | NM_021810 | CDH26 | 1 |
| hsa-miR-5010 | NM_021810 | CDH26 | 1 |
| hsa-miR-5088 | NM_021810 | CDH26 | 1 |
| hsa-miR-5187 | NM_021810 | CDH26 | 1 |
| hsa-miR-5189 | NM_021810 | CDH26 | 1 |
| hsa-miR-5196 | NM_021810 | CDH26 | 1 |
| hsa-miR-5585 | NM_021810 | CDH26 | 1 |
| hsa-miR-5588 | NM_021810 | CDH26 | 1 |
| hsa-miR-5787 | NM_021810 | CDH26 | 1 |
| hsa-miR-6074 | NM_021810 | CDH26 | 1 |
| hsa-miR-6124 | NM_021810 | CDH26 | 1 |
| hsa-miR-6165 | NM_021810 | CDH26 | 1 |
| hsa-miR-6505 | NM_021810 | CDH26 | 1 |
| hsa-miR-6509 | NM_021810 | CDH26 | 1 |
| hsa-miR-6716 | NM_021810 | CDH26 | 1 |
| hsa-miR-6727 | NM_021810 | CDH26 | 1 |
| hsa-miR-6728 | NM_021810 | CDH26 | 1 |
| hsa-miR-6735 | NM_021810 | CDH26 | 1 |
| hsa-miR-6741 | NM_021810 | CDH26 | 1 |
| hsa-miR-6743 | NM_021810 | CDH26 | 1 |
| hsa-miR-6747 | NM_021810 | CDH26 | 1 |
| hsa-miR-6749 | NM_021810 | CDH26 | 1 |
| hsa-miR-6753 | NM_021810 | CDH26 | 1 |
| hsa-miR-6757 | NM_021810 | CDH26 | 1 |
| hsa-miR-6757 | NM_021810 | CDH26 | 1 |
| hsa-miR-6760 | NM_021810 | CDH26 | 1 |
| hsa-miR-6763 | NM_021810 | CDH26 | 1 |
| hsa-miR-6763 | NM_021810 | CDH26 | 1 |
| hsa-miR-6767 | NM_021810 | CDH26 | 1 |
| hsa-miR-6772 | NM_021810 | CDH26 | 1 |
| hsa-miR-6775 | NM_021810 | CDH26 | 1 |
| hsa-miR-6783 | NM_021810 | CDH26 | 1 |
| hsa-miR-6788 | NM_021810 | CDH26 | 1 |
| hsa-miR-6791 | NM_021810 | CDH26 | 1 |
| hsa-miR-6791 | NM_021810 | CDH26 | 1 |
| hsa-miR-6794 | NM_021810 | CDH26 | 1 |
| hsa-miR-6794 | NM_021810 | CDH26 | 1 |
| hsa-miR-6795 | NM_021810 | CDH26 | 1 |
| hsa-miR-6798 | NM_021810 | CDH26 | 1 |

|                          |       |   |
|--------------------------|-------|---|
| hsa-miR-6801 NM_021810   | CDH26 | 1 |
| hsa-miR-6802 NM_021810   | CDH26 | 1 |
| hsa-miR-6807 NM_021810   | CDH26 | 1 |
| hsa-miR-6812 NM_021810   | CDH26 | 1 |
| hsa-miR-6812 NM_021810   | CDH26 | 1 |
| hsa-miR-6824 NM_021810   | CDH26 | 1 |
| hsa-miR-6825 NM_021810   | CDH26 | 1 |
| hsa-miR-6834 NM_021810   | CDH26 | 1 |
| hsa-miR-6834 NM_021810   | CDH26 | 1 |
| hsa-miR-6845 NM_021810   | CDH26 | 1 |
| hsa-miR-6851 NM_021810   | CDH26 | 1 |
| hsa-miR-6765 NM_021810   | CDH26 | 1 |
| hsa-miR-6862 NM_021810   | CDH26 | 1 |
| hsa-miR-6865 NM_021810   | CDH26 | 1 |
| hsa-miR-6866 NM_021810   | CDH26 | 1 |
| hsa-miR-6870 NM_021810   | CDH26 | 1 |
| hsa-miR-6870 NM_021810   | CDH26 | 1 |
| hsa-miR-6873 NM_021810   | CDH26 | 1 |
| hsa-miR-6877 NM_021810   | CDH26 | 1 |
| hsa-miR-6880 NM_021810   | CDH26 | 1 |
| hsa-miR-6880 NM_021810   | CDH26 | 1 |
| hsa-miR-6881 NM_021810   | CDH26 | 1 |
| hsa-miR-6883 NM_021810   | CDH26 | 1 |
| hsa-miR-6891 NM_021810   | CDH26 | 1 |
| hsa-miR-6894 NM_021810   | CDH26 | 1 |
| hsa-miR-7106 NM_021810   | CDH26 | 1 |
| hsa-miR-7111 NM_021810   | CDH26 | 1 |
| hsa-miR-7154 NM_021810   | CDH26 | 1 |
| hsa-miR-7156 NM_021810   | CDH26 | 1 |
| hsa-miR-7158 NM_021810   | CDH26 | 1 |
| hsa-miR-7162 NM_021810   | CDH26 | 1 |
| hsa-miR-4433 NM_021810   | CDH26 | 1 |
| hsa-miR-7845 NM_021810   | CDH26 | 1 |
| hsa-miR-7845 NM_021810   | CDH26 | 1 |
| hsa-miR-7848 NM_021810   | CDH26 | 1 |
| hsa-miR-7854 NM_021810   | CDH26 | 1 |
| hsa-miR-7854 NM_021810   | CDH26 | 1 |
| hsa-miR-8057 NM_021810   | CDH26 | 1 |
| hsa-miR-8085 NM_021810   | CDH26 | 1 |
| hsa-miR-9718 NM_021810   | CDH26 | 1 |
| hsa-miR-1039 NM_021810   | CDH26 | 1 |
| hsa-miR-114C NM_021810   | CDH26 | 1 |
| hsa-miR-6525 NM_021810   | CDH26 | 1 |
| hsa-let-7e-5p NM_0013482 | CDH26 | 1 |
| hsa-let-7e-3p NM_0013482 | CDH26 | 1 |
| hsa-miR-22-5j NM_0013482 | CDH26 | 1 |
| hsa-miR-25-5j NM_0013482 | CDH26 | 1 |
| hsa-miR-96-5j NM_0013482 | CDH26 | 1 |
| hsa-miR-105- NM_0013482  | CDH26 | 1 |
| hsa-miR-139- NM_0013482  | CDH26 | 1 |
| hsa-miR-183- NM_0013482  | CDH26 | 1 |
| hsa-miR-216a NM_0013482  | CDH26 | 1 |
| hsa-miR-30b- NM_0013482  | CDH26 | 1 |
| hsa-miR-30b- NM_0013482  | CDH26 | 1 |
| hsa-miR-125t NM_0013482  | CDH26 | 1 |
| hsa-miR-149- NM_0013482  | CDH26 | 1 |
| hsa-miR-320a NM_0013482  | CDH26 | 1 |
| hsa-miR-219a NM_0013482  | CDH26 | 1 |
| hsa-miR-130t NM_0013482  | CDH26 | 1 |
| hsa-miR-365t NM_0013482  | CDH26 | 1 |
| hsa-miR-365t NM_0013482  | CDH26 | 1 |
| hsa-miR-376a NM_0013482  | CDH26 | 1 |
| hsa-miR-377- NM_0013482  | CDH26 | 1 |
| hsa-miR-381- NM_0013482  | CDH26 | 1 |
| hsa-miR-383- NM_0013482  | CDH26 | 1 |
| hsa-miR-330- NM_0013482  | CDH26 | 1 |
| hsa-miR-324- NM_0013482  | CDH26 | 1 |
| hsa-miR-483- NM_0013482  | CDH26 | 1 |
| hsa-miR-491- NM_0013482  | CDH26 | 1 |
| hsa-miR-202- NM_0013482  | CDH26 | 1 |
| hsa-miR-512- NM_0013482  | CDH26 | 1 |
| hsa-miR-520e NM_0013482  | CDH26 | 1 |
| hsa-miR-526t NM_0013482  | CDH26 | 1 |
| hsa-miR-518t NM_0013482  | CDH26 | 1 |
| hsa-miR-500a NM_0013482  | CDH26 | 1 |
| hsa-miR-503- NM_0013482  | CDH26 | 1 |
| hsa-miR-504- NM_0013482  | CDH26 | 1 |
| hsa-miR-509- NM_0013482  | CDH26 | 1 |
| hsa-miR-92b- NM_0013482  | CDH26 | 1 |
| hsa-miR-590- NM_0013482  | CDH26 | 1 |
| hsa-miR-604 NM_0013482   | CDH26 | 1 |
| hsa-miR-614 NM_0013482   | CDH26 | 1 |
| hsa-miR-625- NM_0013482  | CDH26 | 1 |
| hsa-miR-630 NM_0013482   | CDH26 | 1 |
| hsa-miR-636 NM_0013482   | CDH26 | 1 |
| hsa-miR-1224 NM_0013482  | CDH26 | 1 |
| hsa-miR-320t NM_0013482  | CDH26 | 1 |
| hsa-miR-320c NM_0013482  | CDH26 | 1 |
| hsa-miR-1271 NM_0013482  | CDH26 | 1 |
| hsa-miR-1301 NM_0013482  | CDH26 | 1 |
| hsa-miR-765 NM_0013482   | CDH26 | 1 |
| hsa-miR-675- NM_0013482  | CDH26 | 1 |
| hsa-miR-675- NM_0013482  | CDH26 | 1 |
| hsa-miR-887- NM_0013482  | CDH26 | 1 |

|              |            |       |   |
|--------------|------------|-------|---|
| hsa-miR-760  | NM_0013482 | CDH26 | 1 |
| hsa-miR-936  | NM_0013482 | CDH26 | 1 |
| hsa-miR-938  | NM_0013482 | CDH26 | 1 |
| hsa-miR-1183 | NM_0013482 | CDH26 | 1 |
| hsa-miR-1183 | NM_0013482 | CDH26 | 1 |
| hsa-miR-1202 | NM_0013482 | CDH26 | 1 |
| hsa-miR-1245 | NM_0013482 | CDH26 | 1 |
| hsa-miR-1266 | NM_0013482 | CDH26 | 1 |
| hsa-miR-127C | NM_0013482 | CDH26 | 1 |
| hsa-miR-1275 | NM_0013482 | CDH26 | 1 |
| hsa-miR-1282 | NM_0013482 | CDH26 | 1 |
| hsa-miR-1288 | NM_0013482 | CDH26 | 1 |
| hsa-miR-2277 | NM_0013482 | CDH26 | 1 |
| hsa-miR-2278 | NM_0013482 | CDH26 | 1 |
| hsa-miR-3116 | NM_0013482 | CDH26 | 1 |
| hsa-miR-3125 | NM_0013482 | CDH26 | 1 |
| hsa-miR-313C | NM_0013482 | CDH26 | 1 |
| hsa-miR-3131 | NM_0013482 | CDH26 | 1 |
| hsa-miR-378b | NM_0013482 | CDH26 | 1 |
| hsa-miR-3137 | NM_0013482 | CDH26 | 1 |
| hsa-miR-3146 | NM_0013482 | CDH26 | 1 |
| hsa-miR-315C | NM_0013482 | CDH26 | 1 |
| hsa-miR-3151 | NM_0013482 | CDH26 | 1 |
| hsa-miR-3152 | NM_0013482 | CDH26 | 1 |
| hsa-miR-3153 | NM_0013482 | CDH26 | 1 |
| hsa-miR-3154 | NM_0013482 | CDH26 | 1 |
| hsa-miR-3155 | NM_0013482 | CDH26 | 1 |
| hsa-miR-323b | NM_0013482 | CDH26 | 1 |
| hsa-miR-3188 | NM_0013482 | CDH26 | 1 |
| hsa-miR-3189 | NM_0013482 | CDH26 | 1 |
| hsa-miR-320e | NM_0013482 | CDH26 | 1 |
| hsa-miR-4303 | NM_0013482 | CDH26 | 1 |
| hsa-miR-4324 | NM_0013482 | CDH26 | 1 |
| hsa-miR-4271 | NM_0013482 | CDH26 | 1 |
| hsa-miR-3605 | NM_0013482 | CDH26 | 1 |
| hsa-miR-3614 | NM_0013482 | CDH26 | 1 |
| hsa-miR-3619 | NM_0013482 | CDH26 | 1 |
| hsa-miR-3661 | NM_0013482 | CDH26 | 1 |
| hsa-miR-3661 | NM_0013482 | CDH26 | 1 |
| hsa-miR-367C | NM_0013482 | CDH26 | 1 |
| hsa-miR-3692 | NM_0013482 | CDH26 | 1 |
| hsa-miR-3689 | NM_0013482 | CDH26 | 1 |
| hsa-miR-3921 | NM_0013482 | CDH26 | 1 |
| hsa-miR-3929 | NM_0013482 | CDH26 | 1 |
| hsa-miR-3934 | NM_0013482 | CDH26 | 1 |
| hsa-miR-394C | NM_0013482 | CDH26 | 1 |
| hsa-miR-3945 | NM_0013482 | CDH26 | 1 |
| hsa-miR-642b | NM_0013482 | CDH26 | 1 |
| hsa-miR-1268 | NM_0013482 | CDH26 | 1 |
| hsa-miR-4423 | NM_0013482 | CDH26 | 1 |
| hsa-miR-4429 | NM_0013482 | CDH26 | 1 |
| hsa-miR-4433 | NM_0013482 | CDH26 | 1 |
| hsa-miR-4436 | NM_0013482 | CDH26 | 1 |
| hsa-miR-4446 | NM_0013482 | CDH26 | 1 |
| hsa-miR-4446 | NM_0013482 | CDH26 | 1 |
| hsa-miR-445C | NM_0013482 | CDH26 | 1 |
| hsa-miR-4451 | NM_0013482 | CDH26 | 1 |
| hsa-miR-4474 | NM_0013482 | CDH26 | 1 |
| hsa-miR-4475 | NM_0013482 | CDH26 | 1 |
| hsa-miR-4478 | NM_0013482 | CDH26 | 1 |
| hsa-miR-4478 | NM_0013482 | CDH26 | 1 |
| hsa-miR-3689 | NM_0013482 | CDH26 | 1 |
| hsa-miR-448C | NM_0013482 | CDH26 | 1 |
| hsa-miR-4494 | NM_0013482 | CDH26 | 1 |
| hsa-miR-4494 | NM_0013482 | CDH26 | 1 |
| hsa-miR-4497 | NM_0013482 | CDH26 | 1 |
| hsa-miR-4506 | NM_0013482 | CDH26 | 1 |
| hsa-miR-4507 | NM_0013482 | CDH26 | 1 |
| hsa-miR-452C | NM_0013482 | CDH26 | 1 |
| hsa-miR-1587 | NM_0013482 | CDH26 | 1 |
| hsa-miR-4638 | NM_0013482 | CDH26 | 1 |
| hsa-miR-4638 | NM_0013482 | CDH26 | 1 |
| hsa-miR-465C | NM_0013482 | CDH26 | 1 |
| hsa-miR-4651 | NM_0013482 | CDH26 | 1 |
| hsa-miR-4665 | NM_0013482 | CDH26 | 1 |
| hsa-miR-4669 | NM_0013482 | CDH26 | 1 |
| hsa-miR-4673 | NM_0013482 | CDH26 | 1 |
| hsa-miR-4674 | NM_0013482 | CDH26 | 1 |
| hsa-miR-4676 | NM_0013482 | CDH26 | 1 |
| hsa-miR-4676 | NM_0013482 | CDH26 | 1 |
| hsa-miR-4687 | NM_0013482 | CDH26 | 1 |
| hsa-miR-4688 | NM_0013482 | CDH26 | 1 |
| hsa-miR-469C | NM_0013482 | CDH26 | 1 |
| hsa-miR-4695 | NM_0013482 | CDH26 | 1 |
| hsa-miR-4697 | NM_0013482 | CDH26 | 1 |
| hsa-miR-4697 | NM_0013482 | CDH26 | 1 |
| hsa-miR-4704 | NM_0013482 | CDH26 | 1 |
| hsa-miR-4704 | NM_0013482 | CDH26 | 1 |
| hsa-miR-3529 | NM_0013482 | CDH26 | 1 |
| hsa-miR-4722 | NM_0013482 | CDH26 | 1 |
| hsa-miR-4725 | NM_0013482 | CDH26 | 1 |
| hsa-miR-4732 | NM_0013482 | CDH26 | 1 |
| hsa-miR-4734 | NM_0013482 | CDH26 | 1 |
| hsa-miR-474C | NM_0013482 | CDH26 | 1 |



|                               |            |
|-------------------------------|------------|
| hsa-miR-1039 NM_0013482 CDH26 | 1          |
| hsa-miR-1039 NM_0013482 CDH26 | 1          |
| hsa-miR-1140 NM_0013482 CDH26 | 1          |
| hsa-miR-6529 NM_0013482 CDH26 | 1          |
| hsa-miR-329-1 NM_152327 AK7   | 0.96153846 |
| hsa-miR-8071 NM_152327 AK7    | 0.97435897 |
| hsa-let-7d-5p NM_152327 AK7   | 1          |
| hsa-miR-23a-1 NM_152327 AK7   | 1          |
| hsa-miR-192-1 NM_152327 AK7   | 1          |
| hsa-miR-200b NM_152327 AK7    | 1          |
| hsa-miR-125b NM_152327 AK7    | 1          |
| hsa-miR-370-1 NM_152327 AK7   | 1          |
| hsa-miR-423-1 NM_152327 AK7   | 1          |
| hsa-miR-92b-1 NM_152327 AK7   | 1          |
| hsa-miR-584-1 NM_152327 AK7   | 1          |
| hsa-miR-619-1 NM_152327 AK7   | 1          |
| hsa-miR-619-1 NM_152327 AK7   | 1          |
| hsa-miR-631 NM_152327 AK7     | 1          |
| hsa-miR-656-1 NM_152327 AK7   | 1          |
| hsa-miR-659-1 NM_152327 AK7   | 1          |
| hsa-miR-762 NM_152327 AK7     | 1          |
| hsa-miR-890 NM_152327 AK7     | 1          |
| hsa-miR-891b NM_152327 AK7    | 1          |
| hsa-miR-760 NM_152327 AK7     | 1          |
| hsa-miR-1249 NM_152327 AK7    | 1          |
| hsa-miR-1270 NM_152327 AK7    | 1          |
| hsa-miR-1910 NM_152327 AK7    | 1          |
| hsa-miR-2276 NM_152327 AK7    | 1          |
| hsa-miR-2861 NM_152327 AK7    | 1          |
| hsa-miR-5481 NM_152327 AK7    | 1          |
| hsa-miR-3163 NM_152327 AK7    | 1          |
| hsa-miR-3170 NM_152327 AK7    | 1          |
| hsa-miR-3661 NM_152327 AK7    | 1          |
| hsa-miR-3913 NM_152327 AK7    | 1          |
| hsa-miR-4423 NM_152327 AK7    | 1          |
| hsa-miR-4510 NM_152327 AK7    | 1          |
| hsa-miR-4675 NM_152327 AK7    | 1          |
| hsa-miR-4708 NM_152327 AK7    | 1          |
| hsa-miR-4713 NM_152327 AK7    | 1          |
| hsa-miR-4715 NM_152327 AK7    | 1          |
| hsa-miR-3064 NM_152327 AK7    | 1          |
| hsa-miR-4743 NM_152327 AK7    | 1          |
| hsa-miR-4759 NM_152327 AK7    | 1          |
| hsa-miR-4761 NM_152327 AK7    | 1          |
| hsa-miR-4778 NM_152327 AK7    | 1          |
| hsa-miR-4784 NM_152327 AK7    | 1          |
| hsa-miR-4802 NM_152327 AK7    | 1          |
| hsa-miR-5683 NM_152327 AK7    | 1          |
| hsa-miR-5708 NM_152327 AK7    | 1          |
| hsa-miR-6085 NM_152327 AK7    | 1          |
| hsa-miR-6085 NM_152327 AK7    | 1          |
| hsa-miR-6509 NM_152327 AK7    | 1          |
| hsa-miR-6778 NM_152327 AK7    | 1          |
| hsa-miR-6780 NM_152327 AK7    | 1          |
| hsa-miR-6791 NM_152327 AK7    | 1          |
| hsa-miR-6794 NM_152327 AK7    | 1          |
| hsa-miR-6796 NM_152327 AK7    | 1          |
| hsa-miR-6816 NM_152327 AK7    | 1          |
| hsa-miR-6833 NM_152327 AK7    | 1          |
| hsa-miR-6769 NM_152327 AK7    | 1          |
| hsa-miR-6866 NM_152327 AK7    | 1          |
| hsa-miR-6887 NM_152327 AK7    | 1          |
| hsa-miR-6892 NM_152327 AK7    | 1          |
| hsa-miR-7109 NM_152327 AK7    | 1          |
| hsa-miR-7152 NM_152327 AK7    | 1          |
| hsa-miR-7155 NM_152327 AK7    | 1          |
| hsa-miR-7849 NM_152327 AK7    | 1          |
| hsa-miR-7850 NM_152327 AK7    | 1          |
| hsa-miR-8056 NM_152327 AK7    | 1          |
| hsa-miR-8082 NM_152327 AK7    | 1          |
| hsa-miR-8083 NM_152327 AK7    | 1          |
| hsa-miR-9718 NM_152327 AK7    | 1          |
| hsa-miR-4309 NM_0013762 CRYM  | 0.95384615 |
| hsa-miR-5192 NM_0013762 CRYM  | 0.96153846 |
| hsa-miR-23a-1 NM_0013762 CRYM | 1          |
| hsa-miR-9-5p NM_0013762 CRYM  | 1          |
| hsa-miR-219a NM_0013762 CRYM  | 1          |
| hsa-miR-409-1 NM_0013762 CRYM | 1          |
| hsa-miR-146b NM_0013762 CRYM  | 1          |
| hsa-miR-492 NM_0013762 CRYM   | 1          |
| hsa-miR-432-1 NM_0013762 CRYM | 1          |
| hsa-miR-193b NM_0013762 CRYM  | 1          |
| hsa-miR-181d NM_0013762 CRYM  | 1          |
| hsa-miR-505-1 NM_0013762 CRYM | 1          |
| hsa-miR-1224 NM_0013762 CRYM  | 1          |
| hsa-miR-766-1 NM_0013762 CRYM | 1          |
| hsa-miR-300 NM_0013762 CRYM   | 1          |
| hsa-miR-1321 NM_0013762 CRYM  | 1          |
| hsa-miR-2116 NM_0013762 CRYM  | 1          |
| hsa-miR-2278 NM_0013762 CRYM  | 1          |
| hsa-miR-3154 NM_0013762 CRYM  | 1          |
| hsa-miR-3167 NM_0013762 CRYM  | 1          |
| hsa-miR-4298 NM_0013762 CRYM  | 1          |
| hsa-miR-4300 NM_0013762 CRYM  | 1          |



|                              |            |
|------------------------------|------------|
| hsa-miR-4327 NM_0013762 CRYM | 1          |
| hsa-miR-3927 NM_0013762 CRYM | 1          |
| hsa-miR-3945 NM_0013762 CRYM | 1          |
| hsa-miR-4436 NM_0013762 CRYM | 1          |
| hsa-miR-4451 NM_0013762 CRYM | 1          |
| hsa-miR-4463 NM_0013762 CRYM | 1          |
| hsa-miR-4468 NM_0013762 CRYM | 1          |
| hsa-miR-4488 NM_0013762 CRYM | 1          |
| hsa-miR-4633 NM_0013762 CRYM | 1          |
| hsa-miR-4652 NM_0013762 CRYM | 1          |
| hsa-miR-4667 NM_0013762 CRYM | 1          |
| hsa-miR-4682 NM_0013762 CRYM | 1          |
| hsa-miR-4689 NM_0013762 CRYM | 1          |
| hsa-miR-4700 NM_0013762 CRYM | 1          |
| hsa-miR-4748 NM_0013762 CRYM | 1          |
| hsa-miR-4756 NM_0013762 CRYM | 1          |
| hsa-miR-4436 NM_0013762 CRYM | 1          |
| hsa-miR-4784 NM_0013762 CRYM | 1          |
| hsa-miR-4795 NM_0013762 CRYM | 1          |
| hsa-miR-4524 NM_0013762 CRYM | 1          |
| hsa-miR-5589 NM_0013762 CRYM | 1          |
| hsa-miR-5694 NM_0013762 CRYM | 1          |
| hsa-miR-5739 NM_0013762 CRYM | 1          |
| hsa-miR-6076 NM_0013762 CRYM | 1          |
| hsa-miR-6514 NM_0013762 CRYM | 1          |
| hsa-miR-6733 NM_0013762 CRYM | 1          |
| hsa-miR-6738 NM_0013762 CRYM | 1          |
| hsa-miR-6760 NM_0013762 CRYM | 1          |
| hsa-miR-6763 NM_0013762 CRYM | 1          |
| hsa-miR-6831 NM_0013762 CRYM | 1          |
| hsa-miR-6847 NM_0013762 CRYM | 1          |
| hsa-miR-6857 NM_0013762 CRYM | 1          |
| hsa-miR-6873 NM_0013762 CRYM | 1          |
| hsa-miR-6888 NM_0013762 CRYM | 1          |
| hsa-miR-6889 NM_0013762 CRYM | 1          |
| hsa-miR-7109 NM_0013762 CRYM | 1          |
| hsa-miR-7162 NM_0013762 CRYM | 1          |
| hsa-miR-1211 NM_0013762 CRYM | 1          |
| hsa-let-7e-3p NM_001888 CRYM | 1          |
| hsa-miR-23a-1 NM_001888 CRYM | 1          |
| hsa-miR-424-1 NM_001888 CRYM | 1          |
| hsa-miR-409-1 NM_001888 CRYM | 1          |
| hsa-miR-450a NM_001888 CRYM  | 1          |
| hsa-miR-505-1 NM_001888 CRYM | 1          |
| hsa-miR-1224 NM_001888 CRYM  | 1          |
| hsa-miR-1182 NM_001888 CRYM  | 1          |
| hsa-miR-2116 NM_001888 CRYM  | 1          |
| hsa-miR-2278 NM_001888 CRYM  | 1          |
| hsa-miR-3154 NM_001888 CRYM  | 1          |
| hsa-miR-3916 NM_001888 CRYM  | 1          |
| hsa-miR-3927 NM_001888 CRYM  | 1          |
| hsa-miR-4436 NM_001888 CRYM  | 1          |
| hsa-miR-4451 NM_001888 CRYM  | 1          |
| hsa-miR-4756 NM_001888 CRYM  | 1          |
| hsa-miR-4436 NM_001888 CRYM  | 1          |
| hsa-miR-4784 NM_001888 CRYM  | 1          |
| hsa-miR-6076 NM_001888 CRYM  | 1          |
| hsa-miR-6763 NM_001888 CRYM  | 1          |
| hsa-miR-6847 NM_001888 CRYM  | 1          |
| hsa-miR-1225 NM_001831 CLU   | 0.95384615 |
| hsa-miR-4716 NM_001831 CLU   | 0.95384615 |
| hsa-miR-6756 NM_001831 CLU   | 0.95384615 |
| hsa-miR-449b NM_001831 CLU   | 0.96153846 |
| hsa-miR-659-1 NM_001831 CLU  | 0.96153846 |
| hsa-miR-4326 NM_001831 CLU   | 0.96153846 |
| hsa-miR-6511 NM_001831 CLU   | 0.96153846 |
| hsa-miR-6791 NM_001831 CLU   | 0.96153846 |
| hsa-miR-6794 NM_001831 CLU   | 0.96153846 |
| hsa-miR-1827 NM_001831 CLU   | 0.96923077 |
| hsa-miR-4518 NM_001831 CLU   | 0.97435897 |
| hsa-miR-4667 NM_001831 CLU   | 0.97435897 |
| hsa-miR-6510 NM_001831 CLU   | 0.97435897 |
| hsa-miR-28-5j NM_001831 CLU  | 1          |
| hsa-miR-31-5j NM_001831 CLU  | 1          |
| hsa-miR-92a-1 NM_001831 CLU  | 1          |
| hsa-miR-101-1 NM_001831 CLU  | 1          |
| hsa-miR-198 NM_001831 CLU    | 1          |
| hsa-miR-30c-1 NM_001831 CLU  | 1          |
| hsa-miR-181c NM_001831 CLU   | 1          |
| hsa-miR-204-1 NM_001831 CLU  | 1          |
| hsa-miR-204-2 NM_001831 CLU  | 1          |
| hsa-miR-211-1 NM_001831 CLU  | 1          |
| hsa-miR-216a NM_001831 CLU   | 1          |
| hsa-miR-217-1 NM_001831 CLU  | 1          |
| hsa-miR-219a NM_001831 CLU   | 1          |
| hsa-let-7g-3p NM_001831 CLU  | 1          |
| hsa-miR-23b-1 NM_001831 CLU  | 1          |
| hsa-miR-122-1 NM_001831 CLU  | 1          |
| hsa-miR-125b NM_001831 CLU   | 1          |
| hsa-miR-140-1 NM_001831 CLU  | 1          |
| hsa-miR-143-1 NM_001831 CLU  | 1          |
| hsa-miR-125b NM_001831 CLU   | 1          |
| hsa-miR-127-1 NM_001831 CLU  | 1          |
| hsa-miR-149-1 NM_001831 CLU  | 1          |

|              |           |     |   |
|--------------|-----------|-----|---|
| hsa-miR-150- | NM_001831 | CLU | 1 |
| hsa-miR-184  | NM_001831 | CLU | 1 |
| hsa-miR-188- | NM_001831 | CLU | 1 |
| hsa-miR-200c | NM_001831 | CLU | 1 |
| hsa-miR-361- | NM_001831 | CLU | 1 |
| hsa-miR-369- | NM_001831 | CLU | 1 |
| hsa-miR-377- | NM_001831 | CLU | 1 |
| hsa-miR-328- | NM_001831 | CLU | 1 |
| hsa-miR-326  | NM_001831 | CLU | 1 |
| hsa-miR-331- | NM_001831 | CLU | 1 |
| hsa-miR-324- | NM_001831 | CLU | 1 |
| hsa-miR-423- | NM_001831 | CLU | 1 |
| hsa-miR-424- | NM_001831 | CLU | 1 |
| hsa-miR-424- | NM_001831 | CLU | 1 |
| hsa-miR-18b- | NM_001831 | CLU | 1 |
| hsa-miR-20b- | NM_001831 | CLU | 1 |
| hsa-miR-483- | NM_001831 | CLU | 1 |
| hsa-miR-486- | NM_001831 | CLU | 1 |
| hsa-miR-181d | NM_001831 | CLU | 1 |
| hsa-miR-501- | NM_001831 | CLU | 1 |
| hsa-miR-509- | NM_001831 | CLU | 1 |
| hsa-miR-555  | NM_001831 | CLU | 1 |
| hsa-miR-575  | NM_001831 | CLU | 1 |
| hsa-miR-604  | NM_001831 | CLU | 1 |
| hsa-miR-610  | NM_001831 | CLU | 1 |
| hsa-miR-611  | NM_001831 | CLU | 1 |
| hsa-miR-611  | NM_001831 | CLU | 1 |
| hsa-miR-614  | NM_001831 | CLU | 1 |
| hsa-miR-618  | NM_001831 | CLU | 1 |
| hsa-miR-623  | NM_001831 | CLU | 1 |
| hsa-miR-632  | NM_001831 | CLU | 1 |
| hsa-miR-638  | NM_001831 | CLU | 1 |
| hsa-miR-647  | NM_001831 | CLU | 1 |
| hsa-miR-648  | NM_001831 | CLU | 1 |
| hsa-miR-652- | NM_001831 | CLU | 1 |
| hsa-miR-654- | NM_001831 | CLU | 1 |
| hsa-miR-660- | NM_001831 | CLU | 1 |
| hsa-miR-660- | NM_001831 | CLU | 1 |
| hsa-miR-660- | NM_001831 | CLU | 1 |
| hsa-miR-660- | NM_001831 | CLU | 1 |
| hsa-miR-668- | NM_001831 | CLU | 1 |
| hsa-miR-767- | NM_001831 | CLU | 1 |
| hsa-miR-320c | NM_001831 | CLU | 1 |
| hsa-miR-1296 | NM_001831 | CLU | 1 |
| hsa-miR-1468 | NM_001831 | CLU | 1 |
| hsa-miR-1271 | NM_001831 | CLU | 1 |
| hsa-miR-449c | NM_001831 | CLU | 1 |
| hsa-miR-769- | NM_001831 | CLU | 1 |
| hsa-miR-378d | NM_001831 | CLU | 1 |
| hsa-miR-761  | NM_001831 | CLU | 1 |
| hsa-miR-761  | NM_001831 | CLU | 1 |
| hsa-miR-675- | NM_001831 | CLU | 1 |
| hsa-miR-892b | NM_001831 | CLU | 1 |
| hsa-miR-885- | NM_001831 | CLU | 1 |
| hsa-miR-885- | NM_001831 | CLU | 1 |
| hsa-miR-873- | NM_001831 | CLU | 1 |
| hsa-miR-920  | NM_001831 | CLU | 1 |
| hsa-miR-920  | NM_001831 | CLU | 1 |
| hsa-miR-939- | NM_001831 | CLU | 1 |
| hsa-miR-942- | NM_001831 | CLU | 1 |
| hsa-miR-1226 | NM_001831 | CLU | 1 |
| hsa-miR-1227 | NM_001831 | CLU | 1 |
| hsa-miR-1228 | NM_001831 | CLU | 1 |
| hsa-miR-1228 | NM_001831 | CLU | 1 |
| hsa-miR-1228 | NM_001831 | CLU | 1 |
| hsa-miR-1229 | NM_001831 | CLU | 1 |
| hsa-miR-1229 | NM_001831 | CLU | 1 |
| hsa-miR-1229 | NM_001831 | CLU | 1 |
| hsa-miR-1234 | NM_001831 | CLU | 1 |
| hsa-miR-1237 | NM_001831 | CLU | 1 |
| hsa-miR-1285 | NM_001831 | CLU | 1 |
| hsa-miR-1286 | NM_001831 | CLU | 1 |
| hsa-miR-548k | NM_001831 | CLU | 1 |
| hsa-miR-1293 | NM_001831 | CLU | 1 |
| hsa-miR-1304 | NM_001831 | CLU | 1 |
| hsa-miR-1247 | NM_001831 | CLU | 1 |
| hsa-miR-1260 | NM_001831 | CLU | 1 |
| hsa-miR-1266 | NM_001831 | CLU | 1 |
| hsa-miR-1306 | NM_001831 | CLU | 1 |
| hsa-miR-513b | NM_001831 | CLU | 1 |
| hsa-miR-1537 | NM_001831 | CLU | 1 |
| hsa-miR-103b | NM_001831 | CLU | 1 |
| hsa-miR-1908 | NM_001831 | CLU | 1 |
| hsa-miR-1911 | NM_001831 | CLU | 1 |
| hsa-miR-1915 | NM_001831 | CLU | 1 |
| hsa-miR-2116 | NM_001831 | CLU | 1 |
| hsa-miR-2117 | NM_001831 | CLU | 1 |
| hsa-miR-2277 | NM_001831 | CLU | 1 |
| hsa-miR-3120 | NM_001831 | CLU | 1 |
| hsa-miR-3121 | NM_001831 | CLU | 1 |
| hsa-miR-3122 | NM_001831 | CLU | 1 |
| hsa-miR-3139 | NM_001831 | CLU | 1 |
| hsa-miR-3142 | NM_001831 | CLU | 1 |
| hsa-miR-3147 | NM_001831 | CLU | 1 |
| hsa-miR-3160 | NM_001831 | CLU | 1 |
| hsa-miR-3162 | NM_001831 | CLU | 1 |

|                         |     |   |
|-------------------------|-----|---|
| hsa-miR-3163 NM_001831  | CLU | 1 |
| hsa-miR-1260 NM_001831  | CLU | 1 |
| hsa-miR-3169 NM_001831  | CLU | 1 |
| hsa-miR-3173 NM_001831  | CLU | 1 |
| hsa-miR-3175 NM_001831  | CLU | 1 |
| hsa-miR-3185 NM_001831  | CLU | 1 |
| hsa-miR-3187 NM_001831  | CLU | 1 |
| hsa-miR-3189 NM_001831  | CLU | 1 |
| hsa-miR-3190 NM_001831  | CLU | 1 |
| hsa-miR-3194 NM_001831  | CLU | 1 |
| hsa-miR-4297 NM_001831  | CLU | 1 |
| hsa-miR-378c NM_001831  | CLU | 1 |
| hsa-miR-4312 NM_001831  | CLU | 1 |
| hsa-miR-4257 NM_001831  | CLU | 1 |
| hsa-miR-2355 NM_001831  | CLU | 1 |
| hsa-miR-4283 NM_001831  | CLU | 1 |
| hsa-miR-4289 NM_001831  | CLU | 1 |
| hsa-miR-3605 NM_001831  | CLU | 1 |
| hsa-miR-3619 NM_001831  | CLU | 1 |
| hsa-miR-3620 NM_001831  | CLU | 1 |
| hsa-miR-3622 NM_001831  | CLU | 1 |
| hsa-miR-3622 NM_001831  | CLU | 1 |
| hsa-miR-3661 NM_001831  | CLU | 1 |
| hsa-miR-3664 NM_001831  | CLU | 1 |
| hsa-miR-3666 NM_001831  | CLU | 1 |
| hsa-miR-3685 NM_001831  | CLU | 1 |
| hsa-miR-3689 NM_001831  | CLU | 1 |
| hsa-miR-3692 NM_001831  | CLU | 1 |
| hsa-miR-3180 NM_001831  | CLU | 1 |
| hsa-miR-3907 NM_001831  | CLU | 1 |
| hsa-miR-3689 NM_001831  | CLU | 1 |
| hsa-miR-3921 NM_001831  | CLU | 1 |
| hsa-miR-3927 NM_001831  | CLU | 1 |
| hsa-miR-676-1 NM_001831 | CLU | 1 |
| hsa-miR-3934 NM_001831  | CLU | 1 |
| hsa-miR-642b NM_001831  | CLU | 1 |
| hsa-miR-548a NM_001831  | CLU | 1 |
| hsa-miR-378f NM_001831  | CLU | 1 |
| hsa-miR-378f NM_001831  | CLU | 1 |
| hsa-miR-4423 NM_001831  | CLU | 1 |
| hsa-miR-4435 NM_001831  | CLU | 1 |
| hsa-miR-4445 NM_001831  | CLU | 1 |
| hsa-miR-4446 NM_001831  | CLU | 1 |
| hsa-miR-378h NM_001831  | CLU | 1 |
| hsa-miR-4462 NM_001831  | CLU | 1 |
| hsa-miR-4463 NM_001831  | CLU | 1 |
| hsa-miR-4467 NM_001831  | CLU | 1 |
| hsa-miR-4469 NM_001831  | CLU | 1 |
| hsa-miR-4472 NM_001831  | CLU | 1 |
| hsa-miR-4478 NM_001831  | CLU | 1 |
| hsa-miR-3689 NM_001831  | CLU | 1 |
| hsa-miR-4485 NM_001831  | CLU | 1 |
| hsa-miR-548a NM_001831  | CLU | 1 |
| hsa-miR-4491 NM_001831  | CLU | 1 |
| hsa-miR-4497 NM_001831  | CLU | 1 |
| hsa-miR-4499 NM_001831  | CLU | 1 |
| hsa-miR-4499 NM_001831  | CLU | 1 |
| hsa-miR-4505 NM_001831  | CLU | 1 |
| hsa-miR-4506 NM_001831  | CLU | 1 |
| hsa-miR-2392 NM_001831  | CLU | 1 |
| hsa-miR-4508 NM_001831  | CLU | 1 |
| hsa-miR-4513 NM_001831  | CLU | 1 |
| hsa-miR-4520 NM_001831  | CLU | 1 |
| hsa-miR-4522 NM_001831  | CLU | 1 |
| hsa-miR-4524 NM_001831  | CLU | 1 |
| hsa-miR-4539 NM_001831  | CLU | 1 |
| hsa-miR-4540 NM_001831  | CLU | 1 |
| hsa-miR-3960 NM_001831  | CLU | 1 |
| hsa-miR-3972 NM_001831  | CLU | 1 |
| hsa-miR-4632 NM_001831  | CLU | 1 |
| hsa-miR-4638 NM_001831  | CLU | 1 |
| hsa-miR-4639 NM_001831  | CLU | 1 |
| hsa-miR-4640 NM_001831  | CLU | 1 |
| hsa-miR-4641 NM_001831  | CLU | 1 |
| hsa-miR-4644 NM_001831  | CLU | 1 |
| hsa-miR-4646 NM_001831  | CLU | 1 |
| hsa-miR-4649 NM_001831  | CLU | 1 |
| hsa-miR-4657 NM_001831  | CLU | 1 |
| hsa-miR-4658 NM_001831  | CLU | 1 |
| hsa-miR-4659 NM_001831  | CLU | 1 |
| hsa-miR-4685 NM_001831  | CLU | 1 |
| hsa-miR-4687 NM_001831  | CLU | 1 |
| hsa-miR-1343 NM_001831  | CLU | 1 |
| hsa-miR-4688 NM_001831  | CLU | 1 |
| hsa-miR-4690 NM_001831  | CLU | 1 |
| hsa-miR-4690 NM_001831  | CLU | 1 |
| hsa-miR-4695 NM_001831  | CLU | 1 |
| hsa-miR-4714 NM_001831  | CLU | 1 |
| hsa-miR-4716 NM_001831  | CLU | 1 |
| hsa-miR-4717 NM_001831  | CLU | 1 |
| hsa-miR-4721 NM_001831  | CLU | 1 |
| hsa-miR-4722 NM_001831  | CLU | 1 |
| hsa-miR-4723 NM_001831  | CLU | 1 |
| hsa-miR-4723 NM_001831  | CLU | 1 |

|                        |     |   |
|------------------------|-----|---|
| hsa-miR-4727 NM_001831 | CLU | 1 |
| hsa-miR-4728 NM_001831 | CLU | 1 |
| hsa-miR-4732 NM_001831 | CLU | 1 |
| hsa-miR-4741 NM_001831 | CLU | 1 |
| hsa-miR-4743 NM_001831 | CLU | 1 |
| hsa-miR-4743 NM_001831 | CLU | 1 |
| hsa-miR-4754 NM_001831 | CLU | 1 |
| hsa-miR-4758 NM_001831 | CLU | 1 |
| hsa-miR-4768 NM_001831 | CLU | 1 |
| hsa-miR-4769 NM_001831 | CLU | 1 |
| hsa-miR-4776 NM_001831 | CLU | 1 |
| hsa-miR-4778 NM_001831 | CLU | 1 |
| hsa-miR-4780 NM_001831 | CLU | 1 |
| hsa-miR-4784 NM_001831 | CLU | 1 |
| hsa-miR-4793 NM_001831 | CLU | 1 |
| hsa-miR-4800 NM_001831 | CLU | 1 |
| hsa-miR-4804 NM_001831 | CLU | 1 |
| hsa-miR-5000 NM_001831 | CLU | 1 |
| hsa-miR-5001 NM_001831 | CLU | 1 |
| hsa-miR-5002 NM_001831 | CLU | 1 |
| hsa-miR-5088 NM_001831 | CLU | 1 |
| hsa-miR-5088 NM_001831 | CLU | 1 |
| hsa-miR-5089 NM_001831 | CLU | 1 |
| hsa-miR-5091 NM_001831 | CLU | 1 |
| hsa-miR-5187 NM_001831 | CLU | 1 |
| hsa-miR-5196 NM_001831 | CLU | 1 |
| hsa-miR-5100 NM_001831 | CLU | 1 |
| hsa-miR-5572 NM_001831 | CLU | 1 |
| hsa-miR-548a NM_001831 | CLU | 1 |
| hsa-miR-5581 NM_001831 | CLU | 1 |
| hsa-miR-5584 NM_001831 | CLU | 1 |
| hsa-miR-5584 NM_001831 | CLU | 1 |
| hsa-miR-5591 NM_001831 | CLU | 1 |
| hsa-miR-5682 NM_001831 | CLU | 1 |
| hsa-miR-5685 NM_001831 | CLU | 1 |
| hsa-miR-4666 NM_001831 | CLU | 1 |
| hsa-miR-5708 NM_001831 | CLU | 1 |
| hsa-miR-5739 NM_001831 | CLU | 1 |
| hsa-miR-6069 NM_001831 | CLU | 1 |
| hsa-miR-6085 NM_001831 | CLU | 1 |
| hsa-miR-378j NM_001831 | CLU | 1 |
| hsa-miR-6129 NM_001831 | CLU | 1 |
| hsa-miR-6129 NM_001831 | CLU | 1 |
| hsa-miR-6499 NM_001831 | CLU | 1 |
| hsa-miR-6510 NM_001831 | CLU | 1 |
| hsa-miR-6510 NM_001831 | CLU | 1 |
| hsa-miR-6511 NM_001831 | CLU | 1 |
| hsa-miR-6513 NM_001831 | CLU | 1 |
| hsa-miR-6514 NM_001831 | CLU | 1 |
| hsa-miR-6515 NM_001831 | CLU | 1 |
| hsa-miR-6716 NM_001831 | CLU | 1 |
| hsa-miR-6717 NM_001831 | CLU | 1 |
| hsa-miR-6511 NM_001831 | CLU | 1 |
| hsa-miR-6728 NM_001831 | CLU | 1 |
| hsa-miR-6729 NM_001831 | CLU | 1 |
| hsa-miR-6731 NM_001831 | CLU | 1 |
| hsa-miR-6731 NM_001831 | CLU | 1 |
| hsa-miR-6738 NM_001831 | CLU | 1 |
| hsa-miR-6740 NM_001831 | CLU | 1 |
| hsa-miR-6742 NM_001831 | CLU | 1 |
| hsa-miR-6745 NM_001831 | CLU | 1 |
| hsa-miR-6746 NM_001831 | CLU | 1 |
| hsa-miR-6747 NM_001831 | CLU | 1 |
| hsa-miR-6748 NM_001831 | CLU | 1 |
| hsa-miR-6749 NM_001831 | CLU | 1 |
| hsa-miR-6750 NM_001831 | CLU | 1 |
| hsa-miR-6751 NM_001831 | CLU | 1 |
| hsa-miR-6752 NM_001831 | CLU | 1 |
| hsa-miR-6754 NM_001831 | CLU | 1 |
| hsa-miR-6758 NM_001831 | CLU | 1 |
| hsa-miR-6758 NM_001831 | CLU | 1 |
| hsa-miR-6759 NM_001831 | CLU | 1 |
| hsa-miR-6762 NM_001831 | CLU | 1 |
| hsa-miR-6763 NM_001831 | CLU | 1 |
| hsa-miR-6764 NM_001831 | CLU | 1 |
| hsa-miR-6769 NM_001831 | CLU | 1 |
| hsa-miR-6772 NM_001831 | CLU | 1 |
| hsa-miR-6773 NM_001831 | CLU | 1 |
| hsa-miR-6775 NM_001831 | CLU | 1 |
| hsa-miR-6776 NM_001831 | CLU | 1 |
| hsa-miR-6777 NM_001831 | CLU | 1 |
| hsa-miR-6778 NM_001831 | CLU | 1 |
| hsa-miR-6779 NM_001831 | CLU | 1 |
| hsa-miR-6780 NM_001831 | CLU | 1 |
| hsa-miR-6782 NM_001831 | CLU | 1 |
| hsa-miR-6784 NM_001831 | CLU | 1 |
| hsa-miR-6786 NM_001831 | CLU | 1 |
| hsa-miR-6787 NM_001831 | CLU | 1 |
| hsa-miR-6790 NM_001831 | CLU | 1 |
| hsa-miR-6790 NM_001831 | CLU | 1 |
| hsa-miR-6794 NM_001831 | CLU | 1 |
| hsa-miR-6795 NM_001831 | CLU | 1 |
| hsa-miR-6796 NM_001831 | CLU | 1 |
| hsa-miR-6797 NM_001831 | CLU | 1 |

|                         |        |            |
|-------------------------|--------|------------|
| hsa-miR-6798 NM_001831  | CLU    | 1          |
| hsa-miR-6795 NM_001831  | CLU    | 1          |
| hsa-miR-6795 NM_001831  | CLU    | 1          |
| hsa-miR-6801 NM_001831  | CLU    | 1          |
| hsa-miR-6811 NM_001831  | CLU    | 1          |
| hsa-miR-6812 NM_001831  | CLU    | 1          |
| hsa-miR-6812 NM_001831  | CLU    | 1          |
| hsa-miR-6817 NM_001831  | CLU    | 1          |
| hsa-miR-6817 NM_001831  | CLU    | 1          |
| hsa-miR-6818 NM_001831  | CLU    | 1          |
| hsa-miR-6819 NM_001831  | CLU    | 1          |
| hsa-miR-6819 NM_001831  | CLU    | 1          |
| hsa-miR-6824 NM_001831  | CLU    | 1          |
| hsa-miR-6825 NM_001831  | CLU    | 1          |
| hsa-miR-6826 NM_001831  | CLU    | 1          |
| hsa-miR-6827 NM_001831  | CLU    | 1          |
| hsa-miR-6829 NM_001831  | CLU    | 1          |
| hsa-miR-6832 NM_001831  | CLU    | 1          |
| hsa-miR-6834 NM_001831  | CLU    | 1          |
| hsa-miR-6835 NM_001831  | CLU    | 1          |
| hsa-miR-6841 NM_001831  | CLU    | 1          |
| hsa-miR-6845 NM_001831  | CLU    | 1          |
| hsa-miR-6846 NM_001831  | CLU    | 1          |
| hsa-miR-6846 NM_001831  | CLU    | 1          |
| hsa-miR-6847 NM_001831  | CLU    | 1          |
| hsa-miR-6851 NM_001831  | CLU    | 1          |
| hsa-miR-6851 NM_001831  | CLU    | 1          |
| hsa-miR-6856 NM_001831  | CLU    | 1          |
| hsa-miR-6857 NM_001831  | CLU    | 1          |
| hsa-miR-6858 NM_001831  | CLU    | 1          |
| hsa-miR-6859 NM_001831  | CLU    | 1          |
| hsa-miR-6859 NM_001831  | CLU    | 1          |
| hsa-miR-6769 NM_001831  | CLU    | 1          |
| hsa-miR-6860 NM_001831  | CLU    | 1          |
| hsa-miR-6862 NM_001831  | CLU    | 1          |
| hsa-miR-6866 NM_001831  | CLU    | 1          |
| hsa-miR-6867 NM_001831  | CLU    | 1          |
| hsa-miR-6868 NM_001831  | CLU    | 1          |
| hsa-miR-6870 NM_001831  | CLU    | 1          |
| hsa-miR-6873 NM_001831  | CLU    | 1          |
| hsa-miR-6874 NM_001831  | CLU    | 1          |
| hsa-miR-6875 NM_001831  | CLU    | 1          |
| hsa-miR-6875 NM_001831  | CLU    | 1          |
| hsa-miR-6877 NM_001831  | CLU    | 1          |
| hsa-miR-6881 NM_001831  | CLU    | 1          |
| hsa-miR-6881 NM_001831  | CLU    | 1          |
| hsa-miR-6885 NM_001831  | CLU    | 1          |
| hsa-miR-6887 NM_001831  | CLU    | 1          |
| hsa-miR-6889 NM_001831  | CLU    | 1          |
| hsa-miR-6890 NM_001831  | CLU    | 1          |
| hsa-miR-6890 NM_001831  | CLU    | 1          |
| hsa-miR-6891 NM_001831  | CLU    | 1          |
| hsa-miR-6892 NM_001831  | CLU    | 1          |
| hsa-miR-6893 NM_001831  | CLU    | 1          |
| hsa-miR-6893 NM_001831  | CLU    | 1          |
| hsa-miR-6894 NM_001831  | CLU    | 1          |
| hsa-miR-6894 NM_001831  | CLU    | 1          |
| hsa-miR-6895 NM_001831  | CLU    | 1          |
| hsa-miR-7106 NM_001831  | CLU    | 1          |
| hsa-miR-7109 NM_001831  | CLU    | 1          |
| hsa-miR-7111 NM_001831  | CLU    | 1          |
| hsa-miR-7112 NM_001831  | CLU    | 1          |
| hsa-miR-7113 NM_001831  | CLU    | 1          |
| hsa-miR-7113 NM_001831  | CLU    | 1          |
| hsa-miR-7151 NM_001831  | CLU    | 1          |
| hsa-miR-7152 NM_001831  | CLU    | 1          |
| hsa-miR-7706 NM_001831  | CLU    | 1          |
| hsa-miR-7843 NM_001831  | CLU    | 1          |
| hsa-miR-4433 NM_001831  | CLU    | 1          |
| hsa-miR-7848 NM_001831  | CLU    | 1          |
| hsa-miR-7849 NM_001831  | CLU    | 1          |
| hsa-miR-7850 NM_001831  | CLU    | 1          |
| hsa-miR-7851 NM_001831  | CLU    | 1          |
| hsa-miR-8055 NM_001831  | CLU    | 1          |
| hsa-miR-8060 NM_001831  | CLU    | 1          |
| hsa-miR-8062 NM_001831  | CLU    | 1          |
| hsa-miR-8074 NM_001831  | CLU    | 1          |
| hsa-miR-8075 NM_001831  | CLU    | 1          |
| hsa-miR-8078 NM_001831  | CLU    | 1          |
| hsa-miR-9718 NM_001831  | CLU    | 1          |
| hsa-miR-9898 NM_001831  | CLU    | 1          |
| hsa-miR-1039 NM_001831  | CLU    | 1          |
| hsa-miR-1039 NM_001831  | CLU    | 1          |
| hsa-miR-1039 NM_001831  | CLU    | 1          |
| hsa-miR-1118 NM_001831  | CLU    | 1          |
| hsa-miR-3059 NM_001831  | CLU    | 1          |
| hsa-miR-6529 NM_001831  | CLU    | 1          |
| hsa-miR-9851 NM_001831  | CLU    | 1          |
| hsa-miR-1211 NM_001831  | CLU    | 1          |
| hsa-miR-1212 NM_001831  | CLU    | 1          |
| hsa-miR-1212 NM_001831  | CLU    | 1          |
| hsa-miR-1212 NM_001831  | CLU    | 1          |
| hsa-miR-4684 NM_020351  | COL8A1 | 0.95192308 |
| hsa-let-7b-3p NM_020351 | COL8A1 | 0.96153846 |
| hsa-miR-200c NM_020351  | COL8A1 | 0.96153846 |

|               |           |        |            |
|---------------|-----------|--------|------------|
| hsa-miR-410-  | NM_020351 | COL8A1 | 0.96153846 |
| hsa-miR-3651  | NM_020351 | COL8A1 | 0.96153846 |
| hsa-miR-4458  | NM_020351 | COL8A1 | 0.96153846 |
| hsa-miR-4475  | NM_020351 | COL8A1 | 0.96153846 |
| hsa-miR-6725  | NM_020351 | COL8A1 | 0.96153846 |
| hsa-miR-6805  | NM_020351 | COL8A1 | 0.96153846 |
| hsa-let-7b-3p | NM_001850 | COL8A1 | 0.96153846 |
| hsa-miR-200c  | NM_001850 | COL8A1 | 0.96153846 |
| hsa-miR-3651  | NM_001850 | COL8A1 | 0.96153846 |
| hsa-miR-4458  | NM_001850 | COL8A1 | 0.96153846 |
| hsa-miR-4475  | NM_001850 | COL8A1 | 0.96153846 |
| hsa-miR-6725  | NM_001850 | COL8A1 | 0.96153846 |
| hsa-miR-6805  | NM_001850 | COL8A1 | 0.96153846 |
| hsa-miR-2114  | NM_020351 | COL8A1 | 0.96923077 |
| hsa-miR-544t  | NM_020351 | COL8A1 | 0.96923077 |
| hsa-miR-4471  | NM_020351 | COL8A1 | 0.96923077 |
| hsa-miR-2114  | NM_001850 | COL8A1 | 0.96923077 |
| hsa-miR-544t  | NM_001850 | COL8A1 | 0.96923077 |
| hsa-miR-4471  | NM_001850 | COL8A1 | 0.96923077 |
| hsa-miR-1287  | NM_020351 | COL8A1 | 0.97435897 |
| hsa-miR-3165  | NM_020351 | COL8A1 | 0.97435897 |
| hsa-miR-1287  | NM_001850 | COL8A1 | 0.97435897 |
| hsa-miR-3165  | NM_001850 | COL8A1 | 0.97435897 |
| hsa-miR-6778  | NM_020351 | COL8A1 | 0.97802198 |
| hsa-miR-6778  | NM_001850 | COL8A1 | 0.97802198 |
| hsa-miR-29b-  | NM_020351 | COL8A1 | 0.98076923 |
| hsa-miR-29b-  | NM_001850 | COL8A1 | 0.98076923 |
| hsa-let-7a-5p | NM_020351 | COL8A1 | 1          |
| hsa-let-7a-5p | NM_020351 | COL8A1 | 1          |
| hsa-let-7c-5p | NM_020351 | COL8A1 | 1          |
| hsa-let-7d-5p | NM_020351 | COL8A1 | 1          |
| hsa-let-7e-5p | NM_020351 | COL8A1 | 1          |
| hsa-miR-15a-  | NM_020351 | COL8A1 | 1          |
| hsa-miR-106a  | NM_020351 | COL8A1 | 1          |
| hsa-miR-210-  | NM_020351 | COL8A1 | 1          |
| hsa-miR-212-  | NM_020351 | COL8A1 | 1          |
| hsa-miR-214-  | NM_020351 | COL8A1 | 1          |
| hsa-miR-214-  | NM_020351 | COL8A1 | 1          |
| hsa-miR-216a  | NM_020351 | COL8A1 | 1          |
| hsa-miR-219a  | NM_020351 | COL8A1 | 1          |
| hsa-miR-30b-  | NM_020351 | COL8A1 | 1          |
| hsa-miR-30b-  | NM_020351 | COL8A1 | 1          |
| hsa-miR-124-  | NM_020351 | COL8A1 | 1          |
| hsa-miR-133a  | NM_020351 | COL8A1 | 1          |
| hsa-miR-141-  | NM_020351 | COL8A1 | 1          |
| hsa-miR-154-  | NM_020351 | COL8A1 | 1          |
| hsa-miR-193a  | NM_020351 | COL8A1 | 1          |
| hsa-miR-128-  | NM_020351 | COL8A1 | 1          |
| hsa-miR-106t  | NM_020351 | COL8A1 | 1          |
| hsa-miR-106t  | NM_020351 | COL8A1 | 1          |
| hsa-miR-30c-  | NM_020351 | COL8A1 | 1          |
| hsa-miR-219a  | NM_020351 | COL8A1 | 1          |
| hsa-miR-99b-  | NM_020351 | COL8A1 | 1          |
| hsa-miR-296-  | NM_020351 | COL8A1 | 1          |
| hsa-miR-361-  | NM_020351 | COL8A1 | 1          |
| hsa-miR-367-  | NM_020351 | COL8A1 | 1          |
| hsa-miR-346   | NM_020351 | COL8A1 | 1          |
| hsa-miR-483-  | NM_020351 | COL8A1 | 1          |
| hsa-miR-484   | NM_020351 | COL8A1 | 1          |
| hsa-miR-486-  | NM_020351 | COL8A1 | 1          |
| hsa-miR-487a  | NM_020351 | COL8A1 | 1          |
| hsa-miR-491-  | NM_020351 | COL8A1 | 1          |
| hsa-miR-432-  | NM_020351 | COL8A1 | 1          |
| hsa-miR-497-  | NM_020351 | COL8A1 | 1          |
| hsa-miR-497-  | NM_020351 | COL8A1 | 1          |
| hsa-miR-512-  | NM_020351 | COL8A1 | 1          |
| hsa-miR-519c  | NM_020351 | COL8A1 | 1          |
| hsa-miR-519t  | NM_020351 | COL8A1 | 1          |
| hsa-miR-523-  | NM_020351 | COL8A1 | 1          |
| hsa-miR-526a  | NM_020351 | COL8A1 | 1          |
| hsa-miR-520c  | NM_020351 | COL8A1 | 1          |
| hsa-miR-520g  | NM_020351 | COL8A1 | 1          |
| hsa-miR-518e  | NM_020351 | COL8A1 | 1          |
| hsa-miR-518d  | NM_020351 | COL8A1 | 1          |
| hsa-miR-522-  | NM_020351 | COL8A1 | 1          |
| hsa-miR-519a  | NM_020351 | COL8A1 | 1          |
| hsa-miR-504-  | NM_020351 | COL8A1 | 1          |
| hsa-miR-504-  | NM_020351 | COL8A1 | 1          |
| hsa-miR-487t  | NM_020351 | COL8A1 | 1          |
| hsa-miR-574-  | NM_020351 | COL8A1 | 1          |
| hsa-miR-574-  | NM_020351 | COL8A1 | 1          |
| hsa-miR-574-  | NM_020351 | COL8A1 | 1          |
| hsa-miR-579-  | NM_020351 | COL8A1 | 1          |
| hsa-miR-585-  | NM_020351 | COL8A1 | 1          |
| hsa-miR-548t  | NM_020351 | COL8A1 | 1          |
| hsa-miR-588   | NM_020351 | COL8A1 | 1          |
| hsa-miR-589-  | NM_020351 | COL8A1 | 1          |
| hsa-miR-550a  | NM_020351 | COL8A1 | 1          |
| hsa-miR-600   | NM_020351 | COL8A1 | 1          |
| hsa-miR-602   | NM_020351 | COL8A1 | 1          |
| hsa-miR-605-  | NM_020351 | COL8A1 | 1          |
| hsa-miR-615-  | NM_020351 | COL8A1 | 1          |
| hsa-miR-622   | NM_020351 | COL8A1 | 1          |
| hsa-miR-661   | NM_020351 | COL8A1 | 1          |

|              |           |        |   |
|--------------|-----------|--------|---|
| hsa-miR-549a | NM_020351 | COL8A1 | 1 |
| hsa-miR-660- | NM_020351 | COL8A1 | 1 |
| hsa-miR-671- | NM_020351 | COL8A1 | 1 |
| hsa-miR-671- | NM_020351 | COL8A1 | 1 |
| hsa-miR-1224 | NM_020351 | COL8A1 | 1 |
| hsa-miR-449c | NM_020351 | COL8A1 | 1 |
| hsa-miR-449c | NM_020351 | COL8A1 | 1 |
| hsa-miR-1185 | NM_020351 | COL8A1 | 1 |
| hsa-miR-761  | NM_020351 | COL8A1 | 1 |
| hsa-miR-891a | NM_020351 | COL8A1 | 1 |
| hsa-miR-891b | NM_020351 | COL8A1 | 1 |
| hsa-miR-541- | NM_020351 | COL8A1 | 1 |
| hsa-miR-885- | NM_020351 | COL8A1 | 1 |
| hsa-miR-885- | NM_020351 | COL8A1 | 1 |
| hsa-miR-885- | NM_020351 | COL8A1 | 1 |
| hsa-miR-877- | NM_020351 | COL8A1 | 1 |
| hsa-miR-920  | NM_020351 | COL8A1 | 1 |
| hsa-miR-1225 | NM_020351 | COL8A1 | 1 |
| hsa-miR-1228 | NM_020351 | COL8A1 | 1 |
| hsa-miR-1234 | NM_020351 | COL8A1 | 1 |
| hsa-miR-1285 | NM_020351 | COL8A1 | 1 |
| hsa-miR-1289 | NM_020351 | COL8A1 | 1 |
| hsa-miR-1295 | NM_020351 | COL8A1 | 1 |
| hsa-miR-1249 | NM_020351 | COL8A1 | 1 |
| hsa-miR-1253 | NM_020351 | COL8A1 | 1 |
| hsa-miR-1268 | NM_020351 | COL8A1 | 1 |
| hsa-miR-1276 | NM_020351 | COL8A1 | 1 |
| hsa-miR-1307 | NM_020351 | COL8A1 | 1 |
| hsa-miR-1307 | NM_020351 | COL8A1 | 1 |
| hsa-miR-103b | NM_020351 | COL8A1 | 1 |
| hsa-miR-1909 | NM_020351 | COL8A1 | 1 |
| hsa-miR-1910 | NM_020351 | COL8A1 | 1 |
| hsa-miR-1912 | NM_020351 | COL8A1 | 1 |
| hsa-miR-1972 | NM_020351 | COL8A1 | 1 |
| hsa-miR-2114 | NM_020351 | COL8A1 | 1 |
| hsa-miR-2114 | NM_020351 | COL8A1 | 1 |
| hsa-miR-466  | NM_020351 | COL8A1 | 1 |
| hsa-miR-3136 | NM_020351 | COL8A1 | 1 |
| hsa-miR-1273 | NM_020351 | COL8A1 | 1 |
| hsa-miR-3154 | NM_020351 | COL8A1 | 1 |
| hsa-miR-3157 | NM_020351 | COL8A1 | 1 |
| hsa-miR-3158 | NM_020351 | COL8A1 | 1 |
| hsa-miR-1260 | NM_020351 | COL8A1 | 1 |
| hsa-miR-3169 | NM_020351 | COL8A1 | 1 |
| hsa-miR-3177 | NM_020351 | COL8A1 | 1 |
| hsa-miR-3177 | NM_020351 | COL8A1 | 1 |
| hsa-miR-3191 | NM_020351 | COL8A1 | 1 |
| hsa-miR-3192 | NM_020351 | COL8A1 | 1 |
| hsa-miR-3197 | NM_020351 | COL8A1 | 1 |
| hsa-miR-514b | NM_020351 | COL8A1 | 1 |
| hsa-miR-514b | NM_020351 | COL8A1 | 1 |
| hsa-miR-3202 | NM_020351 | COL8A1 | 1 |
| hsa-miR-4301 | NM_020351 | COL8A1 | 1 |
| hsa-miR-4298 | NM_020351 | COL8A1 | 1 |
| hsa-miR-2355 | NM_020351 | COL8A1 | 1 |
| hsa-miR-4287 | NM_020351 | COL8A1 | 1 |
| hsa-miR-3617 | NM_020351 | COL8A1 | 1 |
| hsa-miR-3617 | NM_020351 | COL8A1 | 1 |
| hsa-miR-3619 | NM_020351 | COL8A1 | 1 |
| hsa-miR-3619 | NM_020351 | COL8A1 | 1 |
| hsa-miR-3657 | NM_020351 | COL8A1 | 1 |
| hsa-miR-3662 | NM_020351 | COL8A1 | 1 |
| hsa-miR-3664 | NM_020351 | COL8A1 | 1 |
| hsa-miR-3675 | NM_020351 | COL8A1 | 1 |
| hsa-miR-3680 | NM_020351 | COL8A1 | 1 |
| hsa-miR-3688 | NM_020351 | COL8A1 | 1 |
| hsa-miR-3180 | NM_020351 | COL8A1 | 1 |
| hsa-miR-3689 | NM_020351 | COL8A1 | 1 |
| hsa-miR-3940 | NM_020351 | COL8A1 | 1 |
| hsa-miR-1268 | NM_020351 | COL8A1 | 1 |
| hsa-miR-4430 | NM_020351 | COL8A1 | 1 |
| hsa-miR-4433 | NM_020351 | COL8A1 | 1 |
| hsa-miR-4455 | NM_020351 | COL8A1 | 1 |
| hsa-miR-3135 | NM_020351 | COL8A1 | 1 |
| hsa-miR-4467 | NM_020351 | COL8A1 | 1 |
| hsa-miR-4469 | NM_020351 | COL8A1 | 1 |
| hsa-miR-4478 | NM_020351 | COL8A1 | 1 |
| hsa-miR-3689 | NM_020351 | COL8A1 | 1 |
| hsa-miR-4480 | NM_020351 | COL8A1 | 1 |
| hsa-miR-4480 | NM_020351 | COL8A1 | 1 |
| hsa-miR-4481 | NM_020351 | COL8A1 | 1 |
| hsa-miR-4487 | NM_020351 | COL8A1 | 1 |
| hsa-miR-4492 | NM_020351 | COL8A1 | 1 |
| hsa-miR-4493 | NM_020351 | COL8A1 | 1 |
| hsa-miR-4496 | NM_020351 | COL8A1 | 1 |
| hsa-miR-4501 | NM_020351 | COL8A1 | 1 |
| hsa-miR-2392 | NM_020351 | COL8A1 | 1 |
| hsa-miR-4520 | NM_020351 | COL8A1 | 1 |
| hsa-miR-4524 | NM_020351 | COL8A1 | 1 |
| hsa-miR-4536 | NM_020351 | COL8A1 | 1 |
| hsa-miR-4538 | NM_020351 | COL8A1 | 1 |
| hsa-miR-4632 | NM_020351 | COL8A1 | 1 |
| hsa-miR-4639 | NM_020351 | COL8A1 | 1 |
| hsa-miR-4639 | NM_020351 | COL8A1 | 1 |

|                        |        |   |
|------------------------|--------|---|
| hsa-miR-4645 NM_020351 | COL8A1 | 1 |
| hsa-miR-4653 NM_020351 | COL8A1 | 1 |
| hsa-miR-4663 NM_020351 | COL8A1 | 1 |
| hsa-miR-4676 NM_020351 | COL8A1 | 1 |
| hsa-miR-4681 NM_020351 | COL8A1 | 1 |
| hsa-miR-4687 NM_020351 | COL8A1 | 1 |
| hsa-miR-4687 NM_020351 | COL8A1 | 1 |
| hsa-miR-1343 NM_020351 | COL8A1 | 1 |
| hsa-miR-4695 NM_020351 | COL8A1 | 1 |
| hsa-miR-4701 NM_020351 | COL8A1 | 1 |
| hsa-miR-4701 NM_020351 | COL8A1 | 1 |
| hsa-miR-203b NM_020351 | COL8A1 | 1 |
| hsa-miR-4714 NM_020351 | COL8A1 | 1 |
| hsa-miR-4728 NM_020351 | COL8A1 | 1 |
| hsa-miR-4750 NM_020351 | COL8A1 | 1 |
| hsa-miR-4754 NM_020351 | COL8A1 | 1 |
| hsa-miR-4756 NM_020351 | COL8A1 | 1 |
| hsa-miR-4766 NM_020351 | COL8A1 | 1 |
| hsa-miR-4777 NM_020351 | COL8A1 | 1 |
| hsa-miR-4786 NM_020351 | COL8A1 | 1 |
| hsa-miR-4788 NM_020351 | COL8A1 | 1 |
| hsa-miR-4796 NM_020351 | COL8A1 | 1 |
| hsa-miR-4797 NM_020351 | COL8A1 | 1 |
| hsa-miR-4800 NM_020351 | COL8A1 | 1 |
| hsa-miR-4802 NM_020351 | COL8A1 | 1 |
| hsa-miR-5007 NM_020351 | COL8A1 | 1 |
| hsa-miR-5010 NM_020351 | COL8A1 | 1 |
| hsa-miR-5011 NM_020351 | COL8A1 | 1 |
| hsa-miR-5091 NM_020351 | COL8A1 | 1 |
| hsa-miR-5093 NM_020351 | COL8A1 | 1 |
| hsa-miR-5188 NM_020351 | COL8A1 | 1 |
| hsa-miR-5100 NM_020351 | COL8A1 | 1 |
| hsa-miR-5578 NM_020351 | COL8A1 | 1 |
| hsa-miR-5580 NM_020351 | COL8A1 | 1 |
| hsa-miR-5588 NM_020351 | COL8A1 | 1 |
| hsa-miR-5589 NM_020351 | COL8A1 | 1 |
| hsa-miR-6068 NM_020351 | COL8A1 | 1 |
| hsa-miR-6086 NM_020351 | COL8A1 | 1 |
| hsa-miR-378j NM_020351 | COL8A1 | 1 |
| hsa-miR-6131 NM_020351 | COL8A1 | 1 |
| hsa-miR-6501 NM_020351 | COL8A1 | 1 |
| hsa-miR-6503 NM_020351 | COL8A1 | 1 |
| hsa-miR-6506 NM_020351 | COL8A1 | 1 |
| hsa-miR-6514 NM_020351 | COL8A1 | 1 |
| hsa-miR-6515 NM_020351 | COL8A1 | 1 |
| hsa-miR-6511 NM_020351 | COL8A1 | 1 |
| hsa-miR-892c NM_020351 | COL8A1 | 1 |
| hsa-miR-6727 NM_020351 | COL8A1 | 1 |
| hsa-miR-6730 NM_020351 | COL8A1 | 1 |
| hsa-miR-6735 NM_020351 | COL8A1 | 1 |
| hsa-miR-6741 NM_020351 | COL8A1 | 1 |
| hsa-miR-6741 NM_020351 | COL8A1 | 1 |
| hsa-miR-6746 NM_020351 | COL8A1 | 1 |
| hsa-miR-6751 NM_020351 | COL8A1 | 1 |
| hsa-miR-6756 NM_020351 | COL8A1 | 1 |
| hsa-miR-6758 NM_020351 | COL8A1 | 1 |
| hsa-miR-6758 NM_020351 | COL8A1 | 1 |
| hsa-miR-6761 NM_020351 | COL8A1 | 1 |
| hsa-miR-6762 NM_020351 | COL8A1 | 1 |
| hsa-miR-6764 NM_020351 | COL8A1 | 1 |
| hsa-miR-6769 NM_020351 | COL8A1 | 1 |
| hsa-miR-6778 NM_020351 | COL8A1 | 1 |
| hsa-miR-6782 NM_020351 | COL8A1 | 1 |
| hsa-miR-6788 NM_020351 | COL8A1 | 1 |
| hsa-miR-6795 NM_020351 | COL8A1 | 1 |
| hsa-miR-6795 NM_020351 | COL8A1 | 1 |
| hsa-miR-6805 NM_020351 | COL8A1 | 1 |
| hsa-miR-6811 NM_020351 | COL8A1 | 1 |
| hsa-miR-6815 NM_020351 | COL8A1 | 1 |
| hsa-miR-6821 NM_020351 | COL8A1 | 1 |
| hsa-miR-6823 NM_020351 | COL8A1 | 1 |
| hsa-miR-6827 NM_020351 | COL8A1 | 1 |
| hsa-miR-6827 NM_020351 | COL8A1 | 1 |
| hsa-miR-6833 NM_020351 | COL8A1 | 1 |
| hsa-miR-6780 NM_020351 | COL8A1 | 1 |
| hsa-miR-6838 NM_020351 | COL8A1 | 1 |
| hsa-miR-6838 NM_020351 | COL8A1 | 1 |
| hsa-miR-6840 NM_020351 | COL8A1 | 1 |
| hsa-miR-6841 NM_020351 | COL8A1 | 1 |
| hsa-miR-6847 NM_020351 | COL8A1 | 1 |
| hsa-miR-6848 NM_020351 | COL8A1 | 1 |
| hsa-miR-6857 NM_020351 | COL8A1 | 1 |
| hsa-miR-6862 NM_020351 | COL8A1 | 1 |
| hsa-miR-6864 NM_020351 | COL8A1 | 1 |
| hsa-miR-6864 NM_020351 | COL8A1 | 1 |
| hsa-miR-6865 NM_020351 | COL8A1 | 1 |
| hsa-miR-6867 NM_020351 | COL8A1 | 1 |
| hsa-miR-6873 NM_020351 | COL8A1 | 1 |
| hsa-miR-6876 NM_020351 | COL8A1 | 1 |
| hsa-miR-6884 NM_020351 | COL8A1 | 1 |
| hsa-miR-6890 NM_020351 | COL8A1 | 1 |
| hsa-miR-6892 NM_020351 | COL8A1 | 1 |
| hsa-miR-7107 NM_020351 | COL8A1 | 1 |
| hsa-miR-7151 NM_020351 | COL8A1 | 1 |
| hsa-miR-7154 NM_020351 | COL8A1 | 1 |



|                         |        |   |
|-------------------------|--------|---|
| hsa-miR-7157 NM_020351  | COL8A1 | 1 |
| hsa-miR-7703 NM_020351  | COL8A1 | 1 |
| hsa-miR-1273 NM_020351  | COL8A1 | 1 |
| hsa-miR-6516 NM_020351  | COL8A1 | 1 |
| hsa-miR-7846 NM_020351  | COL8A1 | 1 |
| hsa-miR-7850 NM_020351  | COL8A1 | 1 |
| hsa-miR-7851 NM_020351  | COL8A1 | 1 |
| hsa-miR-7855 NM_020351  | COL8A1 | 1 |
| hsa-miR-8060 NM_020351  | COL8A1 | 1 |
| hsa-miR-8072 NM_020351  | COL8A1 | 1 |
| hsa-miR-8081 NM_020351  | COL8A1 | 1 |
| hsa-miR-8086 NM_020351  | COL8A1 | 1 |
| hsa-miR-9718 NM_020351  | COL8A1 | 1 |
| hsa-miR-9986 NM_020351  | COL8A1 | 1 |
| hsa-miR-1035 NM_020351  | COL8A1 | 1 |
| hsa-miR-1035 NM_020351  | COL8A1 | 1 |
| hsa-miR-1118 NM_020351  | COL8A1 | 1 |
| hsa-miR-6525 NM_020351  | COL8A1 | 1 |
| hsa-miR-1211 NM_020351  | COL8A1 | 1 |
| hsa-miR-1211 NM_020351  | COL8A1 | 1 |
| hsa-miR-1213 NM_020351  | COL8A1 | 1 |
| hsa-let-7a-5p NM_001850 | COL8A1 | 1 |
| hsa-let-7a-5p NM_001850 | COL8A1 | 1 |
| hsa-let-7c-5p NM_001850 | COL8A1 | 1 |
| hsa-let-7d-5p NM_001850 | COL8A1 | 1 |
| hsa-let-7e-5p NM_001850 | COL8A1 | 1 |
| hsa-miR-15a-1 NM_001850 | COL8A1 | 1 |
| hsa-miR-106a NM_001850  | COL8A1 | 1 |
| hsa-miR-210-1 NM_001850 | COL8A1 | 1 |
| hsa-miR-212-1 NM_001850 | COL8A1 | 1 |
| hsa-miR-214-1 NM_001850 | COL8A1 | 1 |
| hsa-miR-214-1 NM_001850 | COL8A1 | 1 |
| hsa-miR-216a NM_001850  | COL8A1 | 1 |
| hsa-miR-219a NM_001850  | COL8A1 | 1 |
| hsa-miR-30b-1 NM_001850 | COL8A1 | 1 |
| hsa-miR-30b-1 NM_001850 | COL8A1 | 1 |
| hsa-miR-124-1 NM_001850 | COL8A1 | 1 |
| hsa-miR-133a NM_001850  | COL8A1 | 1 |
| hsa-miR-141-1 NM_001850 | COL8A1 | 1 |
| hsa-miR-154-1 NM_001850 | COL8A1 | 1 |
| hsa-miR-193a NM_001850  | COL8A1 | 1 |
| hsa-miR-128-1 NM_001850 | COL8A1 | 1 |
| hsa-miR-106b NM_001850  | COL8A1 | 1 |
| hsa-miR-106b NM_001850  | COL8A1 | 1 |
| hsa-miR-30c-1 NM_001850 | COL8A1 | 1 |
| hsa-miR-219a NM_001850  | COL8A1 | 1 |
| hsa-miR-99b-1 NM_001850 | COL8A1 | 1 |
| hsa-miR-296-1 NM_001850 | COL8A1 | 1 |
| hsa-miR-361-1 NM_001850 | COL8A1 | 1 |
| hsa-miR-367-1 NM_001850 | COL8A1 | 1 |
| hsa-miR-346 NM_001850   | COL8A1 | 1 |
| hsa-miR-410-1 NM_001850 | COL8A1 | 1 |
| hsa-miR-483-1 NM_001850 | COL8A1 | 1 |
| hsa-miR-484 NM_001850   | COL8A1 | 1 |
| hsa-miR-486-1 NM_001850 | COL8A1 | 1 |
| hsa-miR-487a NM_001850  | COL8A1 | 1 |
| hsa-miR-491-1 NM_001850 | COL8A1 | 1 |
| hsa-miR-432-1 NM_001850 | COL8A1 | 1 |
| hsa-miR-497-1 NM_001850 | COL8A1 | 1 |
| hsa-miR-497-1 NM_001850 | COL8A1 | 1 |
| hsa-miR-512-1 NM_001850 | COL8A1 | 1 |
| hsa-miR-519c NM_001850  | COL8A1 | 1 |
| hsa-miR-519t NM_001850  | COL8A1 | 1 |
| hsa-miR-523-1 NM_001850 | COL8A1 | 1 |
| hsa-miR-526a NM_001850  | COL8A1 | 1 |
| hsa-miR-520c NM_001850  | COL8A1 | 1 |
| hsa-miR-520g NM_001850  | COL8A1 | 1 |
| hsa-miR-518e NM_001850  | COL8A1 | 1 |
| hsa-miR-518d NM_001850  | COL8A1 | 1 |
| hsa-miR-522-1 NM_001850 | COL8A1 | 1 |
| hsa-miR-519a NM_001850  | COL8A1 | 1 |
| hsa-miR-504-1 NM_001850 | COL8A1 | 1 |
| hsa-miR-504-1 NM_001850 | COL8A1 | 1 |
| hsa-miR-487b NM_001850  | COL8A1 | 1 |
| hsa-miR-574-1 NM_001850 | COL8A1 | 1 |
| hsa-miR-574-1 NM_001850 | COL8A1 | 1 |
| hsa-miR-574-1 NM_001850 | COL8A1 | 1 |
| hsa-miR-579-1 NM_001850 | COL8A1 | 1 |
| hsa-miR-585-1 NM_001850 | COL8A1 | 1 |
| hsa-miR-548b NM_001850  | COL8A1 | 1 |
| hsa-miR-588 NM_001850   | COL8A1 | 1 |
| hsa-miR-589-1 NM_001850 | COL8A1 | 1 |
| hsa-miR-550a NM_001850  | COL8A1 | 1 |
| hsa-miR-600 NM_001850   | COL8A1 | 1 |
| hsa-miR-602 NM_001850   | COL8A1 | 1 |
| hsa-miR-605-1 NM_001850 | COL8A1 | 1 |
| hsa-miR-615-1 NM_001850 | COL8A1 | 1 |
| hsa-miR-622 NM_001850   | COL8A1 | 1 |
| hsa-miR-661 NM_001850   | COL8A1 | 1 |
| hsa-miR-549a NM_001850  | COL8A1 | 1 |
| hsa-miR-660-1 NM_001850 | COL8A1 | 1 |
| hsa-miR-671-1 NM_001850 | COL8A1 | 1 |
| hsa-miR-671-1 NM_001850 | COL8A1 | 1 |
| hsa-miR-1224 NM_001850  | COL8A1 | 1 |

|              |           |        |   |
|--------------|-----------|--------|---|
| hsa-miR-449c | NM_001850 | COL8A1 | 1 |
| hsa-miR-449c | NM_001850 | COL8A1 | 1 |
| hsa-miR-1185 | NM_001850 | COL8A1 | 1 |
| hsa-miR-761  | NM_001850 | COL8A1 | 1 |
| hsa-miR-891a | NM_001850 | COL8A1 | 1 |
| hsa-miR-891b | NM_001850 | COL8A1 | 1 |
| hsa-miR-541- | NM_001850 | COL8A1 | 1 |
| hsa-miR-885- | NM_001850 | COL8A1 | 1 |
| hsa-miR-885- | NM_001850 | COL8A1 | 1 |
| hsa-miR-885- | NM_001850 | COL8A1 | 1 |
| hsa-miR-877- | NM_001850 | COL8A1 | 1 |
| hsa-miR-920  | NM_001850 | COL8A1 | 1 |
| hsa-miR-1225 | NM_001850 | COL8A1 | 1 |
| hsa-miR-1228 | NM_001850 | COL8A1 | 1 |
| hsa-miR-1234 | NM_001850 | COL8A1 | 1 |
| hsa-miR-1285 | NM_001850 | COL8A1 | 1 |
| hsa-miR-1289 | NM_001850 | COL8A1 | 1 |
| hsa-miR-1295 | NM_001850 | COL8A1 | 1 |
| hsa-miR-1249 | NM_001850 | COL8A1 | 1 |
| hsa-miR-1253 | NM_001850 | COL8A1 | 1 |
| hsa-miR-1268 | NM_001850 | COL8A1 | 1 |
| hsa-miR-1276 | NM_001850 | COL8A1 | 1 |
| hsa-miR-1307 | NM_001850 | COL8A1 | 1 |
| hsa-miR-1307 | NM_001850 | COL8A1 | 1 |
| hsa-miR-103b | NM_001850 | COL8A1 | 1 |
| hsa-miR-1909 | NM_001850 | COL8A1 | 1 |
| hsa-miR-1910 | NM_001850 | COL8A1 | 1 |
| hsa-miR-1912 | NM_001850 | COL8A1 | 1 |
| hsa-miR-1972 | NM_001850 | COL8A1 | 1 |
| hsa-miR-2114 | NM_001850 | COL8A1 | 1 |
| hsa-miR-2114 | NM_001850 | COL8A1 | 1 |
| hsa-miR-466  | NM_001850 | COL8A1 | 1 |
| hsa-miR-3136 | NM_001850 | COL8A1 | 1 |
| hsa-miR-1273 | NM_001850 | COL8A1 | 1 |
| hsa-miR-3154 | NM_001850 | COL8A1 | 1 |
| hsa-miR-3157 | NM_001850 | COL8A1 | 1 |
| hsa-miR-3158 | NM_001850 | COL8A1 | 1 |
| hsa-miR-1260 | NM_001850 | COL8A1 | 1 |
| hsa-miR-3169 | NM_001850 | COL8A1 | 1 |
| hsa-miR-3177 | NM_001850 | COL8A1 | 1 |
| hsa-miR-3177 | NM_001850 | COL8A1 | 1 |
| hsa-miR-3191 | NM_001850 | COL8A1 | 1 |
| hsa-miR-3192 | NM_001850 | COL8A1 | 1 |
| hsa-miR-3197 | NM_001850 | COL8A1 | 1 |
| hsa-miR-514b | NM_001850 | COL8A1 | 1 |
| hsa-miR-514b | NM_001850 | COL8A1 | 1 |
| hsa-miR-3202 | NM_001850 | COL8A1 | 1 |
| hsa-miR-4301 | NM_001850 | COL8A1 | 1 |
| hsa-miR-4298 | NM_001850 | COL8A1 | 1 |
| hsa-miR-2355 | NM_001850 | COL8A1 | 1 |
| hsa-miR-4287 | NM_001850 | COL8A1 | 1 |
| hsa-miR-3617 | NM_001850 | COL8A1 | 1 |
| hsa-miR-3617 | NM_001850 | COL8A1 | 1 |
| hsa-miR-3619 | NM_001850 | COL8A1 | 1 |
| hsa-miR-3619 | NM_001850 | COL8A1 | 1 |
| hsa-miR-3657 | NM_001850 | COL8A1 | 1 |
| hsa-miR-3662 | NM_001850 | COL8A1 | 1 |
| hsa-miR-3664 | NM_001850 | COL8A1 | 1 |
| hsa-miR-3675 | NM_001850 | COL8A1 | 1 |
| hsa-miR-3680 | NM_001850 | COL8A1 | 1 |
| hsa-miR-3688 | NM_001850 | COL8A1 | 1 |
| hsa-miR-3180 | NM_001850 | COL8A1 | 1 |
| hsa-miR-3689 | NM_001850 | COL8A1 | 1 |
| hsa-miR-3940 | NM_001850 | COL8A1 | 1 |
| hsa-miR-1268 | NM_001850 | COL8A1 | 1 |
| hsa-miR-4430 | NM_001850 | COL8A1 | 1 |
| hsa-miR-4433 | NM_001850 | COL8A1 | 1 |
| hsa-miR-4455 | NM_001850 | COL8A1 | 1 |
| hsa-miR-3135 | NM_001850 | COL8A1 | 1 |
| hsa-miR-4467 | NM_001850 | COL8A1 | 1 |
| hsa-miR-4469 | NM_001850 | COL8A1 | 1 |
| hsa-miR-4478 | NM_001850 | COL8A1 | 1 |
| hsa-miR-3689 | NM_001850 | COL8A1 | 1 |
| hsa-miR-4480 | NM_001850 | COL8A1 | 1 |
| hsa-miR-4480 | NM_001850 | COL8A1 | 1 |
| hsa-miR-4481 | NM_001850 | COL8A1 | 1 |
| hsa-miR-4487 | NM_001850 | COL8A1 | 1 |
| hsa-miR-4492 | NM_001850 | COL8A1 | 1 |
| hsa-miR-4493 | NM_001850 | COL8A1 | 1 |
| hsa-miR-4496 | NM_001850 | COL8A1 | 1 |
| hsa-miR-4501 | NM_001850 | COL8A1 | 1 |
| hsa-miR-2392 | NM_001850 | COL8A1 | 1 |
| hsa-miR-4520 | NM_001850 | COL8A1 | 1 |
| hsa-miR-4524 | NM_001850 | COL8A1 | 1 |
| hsa-miR-4536 | NM_001850 | COL8A1 | 1 |
| hsa-miR-4538 | NM_001850 | COL8A1 | 1 |
| hsa-miR-4632 | NM_001850 | COL8A1 | 1 |
| hsa-miR-4639 | NM_001850 | COL8A1 | 1 |
| hsa-miR-4639 | NM_001850 | COL8A1 | 1 |
| hsa-miR-4645 | NM_001850 | COL8A1 | 1 |
| hsa-miR-4653 | NM_001850 | COL8A1 | 1 |
| hsa-miR-4663 | NM_001850 | COL8A1 | 1 |
| hsa-miR-4676 | NM_001850 | COL8A1 | 1 |
| hsa-miR-4681 | NM_001850 | COL8A1 | 1 |

|                        |        |   |
|------------------------|--------|---|
| hsa-miR-4687 NM_001850 | COL8A1 | 1 |
| hsa-miR-4687 NM_001850 | COL8A1 | 1 |
| hsa-miR-1343 NM_001850 | COL8A1 | 1 |
| hsa-miR-4695 NM_001850 | COL8A1 | 1 |
| hsa-miR-4701 NM_001850 | COL8A1 | 1 |
| hsa-miR-4701 NM_001850 | COL8A1 | 1 |
| hsa-miR-203b NM_001850 | COL8A1 | 1 |
| hsa-miR-4714 NM_001850 | COL8A1 | 1 |
| hsa-miR-4728 NM_001850 | COL8A1 | 1 |
| hsa-miR-475C NM_001850 | COL8A1 | 1 |
| hsa-miR-4754 NM_001850 | COL8A1 | 1 |
| hsa-miR-4756 NM_001850 | COL8A1 | 1 |
| hsa-miR-4766 NM_001850 | COL8A1 | 1 |
| hsa-miR-4777 NM_001850 | COL8A1 | 1 |
| hsa-miR-4786 NM_001850 | COL8A1 | 1 |
| hsa-miR-4789 NM_001850 | COL8A1 | 1 |
| hsa-miR-4796 NM_001850 | COL8A1 | 1 |
| hsa-miR-4797 NM_001850 | COL8A1 | 1 |
| hsa-miR-480C NM_001850 | COL8A1 | 1 |
| hsa-miR-4802 NM_001850 | COL8A1 | 1 |
| hsa-miR-5007 NM_001850 | COL8A1 | 1 |
| hsa-miR-501C NM_001850 | COL8A1 | 1 |
| hsa-miR-5011 NM_001850 | COL8A1 | 1 |
| hsa-miR-5091 NM_001850 | COL8A1 | 1 |
| hsa-miR-5093 NM_001850 | COL8A1 | 1 |
| hsa-miR-5189 NM_001850 | COL8A1 | 1 |
| hsa-miR-510C NM_001850 | COL8A1 | 1 |
| hsa-miR-5579 NM_001850 | COL8A1 | 1 |
| hsa-miR-558C NM_001850 | COL8A1 | 1 |
| hsa-miR-5589 NM_001850 | COL8A1 | 1 |
| hsa-miR-6069 NM_001850 | COL8A1 | 1 |
| hsa-miR-6086 NM_001850 | COL8A1 | 1 |
| hsa-miR-378j NM_001850 | COL8A1 | 1 |
| hsa-miR-6131 NM_001850 | COL8A1 | 1 |
| hsa-miR-6501 NM_001850 | COL8A1 | 1 |
| hsa-miR-6503 NM_001850 | COL8A1 | 1 |
| hsa-miR-6506 NM_001850 | COL8A1 | 1 |
| hsa-miR-6514 NM_001850 | COL8A1 | 1 |
| hsa-miR-6515 NM_001850 | COL8A1 | 1 |
| hsa-miR-6511 NM_001850 | COL8A1 | 1 |
| hsa-miR-892c NM_001850 | COL8A1 | 1 |
| hsa-miR-6727 NM_001850 | COL8A1 | 1 |
| hsa-miR-673C NM_001850 | COL8A1 | 1 |
| hsa-miR-6735 NM_001850 | COL8A1 | 1 |
| hsa-miR-6741 NM_001850 | COL8A1 | 1 |
| hsa-miR-6741 NM_001850 | COL8A1 | 1 |
| hsa-miR-6746 NM_001850 | COL8A1 | 1 |
| hsa-miR-6751 NM_001850 | COL8A1 | 1 |
| hsa-miR-6756 NM_001850 | COL8A1 | 1 |
| hsa-miR-6758 NM_001850 | COL8A1 | 1 |
| hsa-miR-6759 NM_001850 | COL8A1 | 1 |
| hsa-miR-6761 NM_001850 | COL8A1 | 1 |
| hsa-miR-6762 NM_001850 | COL8A1 | 1 |
| hsa-miR-6764 NM_001850 | COL8A1 | 1 |
| hsa-miR-6769 NM_001850 | COL8A1 | 1 |
| hsa-miR-6779 NM_001850 | COL8A1 | 1 |
| hsa-miR-6782 NM_001850 | COL8A1 | 1 |
| hsa-miR-6788 NM_001850 | COL8A1 | 1 |
| hsa-miR-6795 NM_001850 | COL8A1 | 1 |
| hsa-miR-6795 NM_001850 | COL8A1 | 1 |
| hsa-miR-6805 NM_001850 | COL8A1 | 1 |
| hsa-miR-6811 NM_001850 | COL8A1 | 1 |
| hsa-miR-6815 NM_001850 | COL8A1 | 1 |
| hsa-miR-6818 NM_001850 | COL8A1 | 1 |
| hsa-miR-6821 NM_001850 | COL8A1 | 1 |
| hsa-miR-6823 NM_001850 | COL8A1 | 1 |
| hsa-miR-6827 NM_001850 | COL8A1 | 1 |
| hsa-miR-6827 NM_001850 | COL8A1 | 1 |
| hsa-miR-6833 NM_001850 | COL8A1 | 1 |
| hsa-miR-678C NM_001850 | COL8A1 | 1 |
| hsa-miR-6838 NM_001850 | COL8A1 | 1 |
| hsa-miR-6838 NM_001850 | COL8A1 | 1 |
| hsa-miR-684C NM_001850 | COL8A1 | 1 |
| hsa-miR-6841 NM_001850 | COL8A1 | 1 |
| hsa-miR-6847 NM_001850 | COL8A1 | 1 |
| hsa-miR-6848 NM_001850 | COL8A1 | 1 |
| hsa-miR-6857 NM_001850 | COL8A1 | 1 |
| hsa-miR-6862 NM_001850 | COL8A1 | 1 |
| hsa-miR-6864 NM_001850 | COL8A1 | 1 |
| hsa-miR-6864 NM_001850 | COL8A1 | 1 |
| hsa-miR-6865 NM_001850 | COL8A1 | 1 |
| hsa-miR-6867 NM_001850 | COL8A1 | 1 |
| hsa-miR-6873 NM_001850 | COL8A1 | 1 |
| hsa-miR-6876 NM_001850 | COL8A1 | 1 |
| hsa-miR-6884 NM_001850 | COL8A1 | 1 |
| hsa-miR-689C NM_001850 | COL8A1 | 1 |
| hsa-miR-6892 NM_001850 | COL8A1 | 1 |
| hsa-miR-7107 NM_001850 | COL8A1 | 1 |
| hsa-miR-7151 NM_001850 | COL8A1 | 1 |
| hsa-miR-7154 NM_001850 | COL8A1 | 1 |
| hsa-miR-7157 NM_001850 | COL8A1 | 1 |
| hsa-miR-7703 NM_001850 | COL8A1 | 1 |
| hsa-miR-1273 NM_001850 | COL8A1 | 1 |
| hsa-miR-6516 NM_001850 | COL8A1 | 1 |

|                         |        |            |
|-------------------------|--------|------------|
| hsa-miR-7846 NM_001850  | COL8A1 | 1          |
| hsa-miR-7850 NM_001850  | COL8A1 | 1          |
| hsa-miR-7851 NM_001850  | COL8A1 | 1          |
| hsa-miR-7855 NM_001850  | COL8A1 | 1          |
| hsa-miR-8060 NM_001850  | COL8A1 | 1          |
| hsa-miR-8072 NM_001850  | COL8A1 | 1          |
| hsa-miR-8081 NM_001850  | COL8A1 | 1          |
| hsa-miR-8086 NM_001850  | COL8A1 | 1          |
| hsa-miR-9718 NM_001850  | COL8A1 | 1          |
| hsa-miR-9986 NM_001850  | COL8A1 | 1          |
| hsa-miR-1039 NM_001850  | COL8A1 | 1          |
| hsa-miR-1039 NM_001850  | COL8A1 | 1          |
| hsa-miR-1118 NM_001850  | COL8A1 | 1          |
| hsa-miR-6529 NM_001850  | COL8A1 | 1          |
| hsa-miR-1211 NM_001850  | COL8A1 | 1          |
| hsa-miR-1211 NM_001850  | COL8A1 | 1          |
| hsa-miR-1213 NM_001850  | COL8A1 | 1          |
| hsa-miR-484 NM_002258   | KLRB1  | 0.95384615 |
| hsa-miR-4781 NM_002258  | KLRB1  | 0.95384615 |
| hsa-miR-6716 NM_002258  | KLRB1  | 0.95384615 |
| hsa-miR-6804 NM_002258  | KLRB1  | 0.95384615 |
| hsa-miR-376c NM_002258  | KLRB1  | 0.96153846 |
| hsa-miR-650 NM_002258   | KLRB1  | 0.96153846 |
| hsa-miR-3713 NM_002258  | KLRB1  | 0.96153846 |
| hsa-miR-4524 NM_002258  | KLRB1  | 0.96153846 |
| hsa-miR-3972 NM_002258  | KLRB1  | 0.96153846 |
| hsa-miR-6077 NM_002258  | KLRB1  | 0.96153846 |
| hsa-miR-6815 NM_002258  | KLRB1  | 0.96153846 |
| hsa-miR-6851 NM_002258  | KLRB1  | 0.96153846 |
| hsa-miR-3153 NM_002258  | KLRB1  | 0.97435897 |
| hsa-miR-4706 NM_002258  | KLRB1  | 0.97435897 |
| hsa-miR-4795 NM_002258  | KLRB1  | 0.97435897 |
| hsa-miR-6794 NM_002258  | KLRB1  | 0.97435897 |
| hsa-miR-892c NM_002258  | KLRB1  | 0.98076923 |
| hsa-miR-6852 NM_002258  | KLRB1  | 0.98076923 |
| hsa-miR-31-5j NM_002258 | KLRB1  | 1          |
| hsa-miR-103a NM_002258  | KLRB1  | 1          |
| hsa-miR-107 NM_002258   | KLRB1  | 1          |
| hsa-miR-10b- NM_002258  | KLRB1  | 1          |
| hsa-miR-211- NM_002258  | KLRB1  | 1          |
| hsa-miR-214- NM_002258  | KLRB1  | 1          |
| hsa-miR-125t NM_002258  | KLRB1  | 1          |
| hsa-miR-185- NM_002258  | KLRB1  | 1          |
| hsa-miR-185- NM_002258  | KLRB1  | 1          |
| hsa-miR-194- NM_002258  | KLRB1  | 1          |
| hsa-miR-370- NM_002258  | KLRB1  | 1          |
| hsa-miR-151a NM_002258  | KLRB1  | 1          |
| hsa-miR-331- NM_002258  | KLRB1  | 1          |
| hsa-miR-486- NM_002258  | KLRB1  | 1          |
| hsa-miR-520g NM_002258  | KLRB1  | 1          |
| hsa-miR-514a NM_002258  | KLRB1  | 1          |
| hsa-miR-514a NM_002258  | KLRB1  | 1          |
| hsa-miR-550a NM_002258  | KLRB1  | 1          |
| hsa-miR-598- NM_002258  | KLRB1  | 1          |
| hsa-miR-615- NM_002258  | KLRB1  | 1          |
| hsa-miR-624- NM_002258  | KLRB1  | 1          |
| hsa-miR-652- NM_002258  | KLRB1  | 1          |
| hsa-miR-550a NM_002258  | KLRB1  | 1          |
| hsa-miR-151b NM_002258  | KLRB1  | 1          |
| hsa-miR-1271 NM_002258  | KLRB1  | 1          |
| hsa-miR-675- NM_002258  | KLRB1  | 1          |
| hsa-miR-887- NM_002258  | KLRB1  | 1          |
| hsa-miR-873- NM_002258  | KLRB1  | 1          |
| hsa-miR-939- NM_002258  | KLRB1  | 1          |
| hsa-miR-1182 NM_002258  | KLRB1  | 1          |
| hsa-miR-1229 NM_002258  | KLRB1  | 1          |
| hsa-miR-1237 NM_002258  | KLRB1  | 1          |
| hsa-miR-1202 NM_002258  | KLRB1  | 1          |
| hsa-miR-1262 NM_002258  | KLRB1  | 1          |
| hsa-miR-147C NM_002258  | KLRB1  | 1          |
| hsa-miR-1914 NM_002258  | KLRB1  | 1          |
| hsa-miR-211C NM_002258  | KLRB1  | 1          |
| hsa-miR-2276 NM_002258  | KLRB1  | 1          |
| hsa-miR-2861 NM_002258  | KLRB1  | 1          |
| hsa-miR-313C NM_002258  | KLRB1  | 1          |
| hsa-miR-3132 NM_002258  | KLRB1  | 1          |
| hsa-miR-3135 NM_002258  | KLRB1  | 1          |
| hsa-miR-3158 NM_002258  | KLRB1  | 1          |
| hsa-miR-3173 NM_002258  | KLRB1  | 1          |
| hsa-miR-3184 NM_002258  | KLRB1  | 1          |
| hsa-miR-3196 NM_002258  | KLRB1  | 1          |
| hsa-miR-4259 NM_002258  | KLRB1  | 1          |
| hsa-miR-3615 NM_002258  | KLRB1  | 1          |
| hsa-miR-3661 NM_002258  | KLRB1  | 1          |
| hsa-miR-3679 NM_002258  | KLRB1  | 1          |
| hsa-miR-3679 NM_002258  | KLRB1  | 1          |
| hsa-miR-1268 NM_002258  | KLRB1  | 1          |
| hsa-miR-4447 NM_002258  | KLRB1  | 1          |
| hsa-miR-3135 NM_002258  | KLRB1  | 1          |
| hsa-miR-3135 NM_002258  | KLRB1  | 1          |
| hsa-miR-4465 NM_002258  | KLRB1  | 1          |
| hsa-miR-4465 NM_002258  | KLRB1  | 1          |
| hsa-miR-4488 NM_002258  | KLRB1  | 1          |
| hsa-miR-4494 NM_002258  | KLRB1  | 1          |

|                         |       |            |
|-------------------------|-------|------------|
| hsa-miR-4506 NM_002258  | KLRB1 | 1          |
| hsa-miR-4651 NM_002258  | KLRB1 | 1          |
| hsa-miR-4657 NM_002258  | KLRB1 | 1          |
| hsa-miR-466C NM_002258  | KLRB1 | 1          |
| hsa-miR-4665 NM_002258  | KLRB1 | 1          |
| hsa-miR-4675 NM_002258  | KLRB1 | 1          |
| hsa-miR-4693 NM_002258  | KLRB1 | 1          |
| hsa-miR-4712 NM_002258  | KLRB1 | 1          |
| hsa-miR-4713 NM_002258  | KLRB1 | 1          |
| hsa-miR-472C NM_002258  | KLRB1 | 1          |
| hsa-miR-4723 NM_002258  | KLRB1 | 1          |
| hsa-miR-4726 NM_002258  | KLRB1 | 1          |
| hsa-miR-4728 NM_002258  | KLRB1 | 1          |
| hsa-miR-4731 NM_002258  | KLRB1 | 1          |
| hsa-miR-4732 NM_002258  | KLRB1 | 1          |
| hsa-miR-4755 NM_002258  | KLRB1 | 1          |
| hsa-miR-4778 NM_002258  | KLRB1 | 1          |
| hsa-miR-501C NM_002258  | KLRB1 | 1          |
| hsa-miR-5192 NM_002258  | KLRB1 | 1          |
| hsa-miR-5195 NM_002258  | KLRB1 | 1          |
| hsa-miR-5196 NM_002258  | KLRB1 | 1          |
| hsa-miR-4524 NM_002258  | KLRB1 | 1          |
| hsa-miR-4524 NM_002258  | KLRB1 | 1          |
| hsa-miR-5572 NM_002258  | KLRB1 | 1          |
| hsa-miR-664b NM_002258  | KLRB1 | 1          |
| hsa-miR-5584 NM_002258  | KLRB1 | 1          |
| hsa-miR-5682 NM_002258  | KLRB1 | 1          |
| hsa-miR-5735 NM_002258  | KLRB1 | 1          |
| hsa-miR-607C NM_002258  | KLRB1 | 1          |
| hsa-miR-6072 NM_002258  | KLRB1 | 1          |
| hsa-miR-6084 NM_002258  | KLRB1 | 1          |
| hsa-miR-6505 NM_002258  | KLRB1 | 1          |
| hsa-miR-6722 NM_002258  | KLRB1 | 1          |
| hsa-miR-6725 NM_002258  | KLRB1 | 1          |
| hsa-miR-6738 NM_002258  | KLRB1 | 1          |
| hsa-miR-6741 NM_002258  | KLRB1 | 1          |
| hsa-miR-6746 NM_002258  | KLRB1 | 1          |
| hsa-miR-6763 NM_002258  | KLRB1 | 1          |
| hsa-miR-6764 NM_002258  | KLRB1 | 1          |
| hsa-miR-6777 NM_002258  | KLRB1 | 1          |
| hsa-miR-6777 NM_002258  | KLRB1 | 1          |
| hsa-miR-6784 NM_002258  | KLRB1 | 1          |
| hsa-miR-6793 NM_002258  | KLRB1 | 1          |
| hsa-miR-6802 NM_002258  | KLRB1 | 1          |
| hsa-miR-681C NM_002258  | KLRB1 | 1          |
| hsa-miR-6812 NM_002258  | KLRB1 | 1          |
| hsa-miR-6818 NM_002258  | KLRB1 | 1          |
| hsa-miR-6823 NM_002258  | KLRB1 | 1          |
| hsa-miR-6833 NM_002258  | KLRB1 | 1          |
| hsa-miR-6834 NM_002258  | KLRB1 | 1          |
| hsa-miR-6837 NM_002258  | KLRB1 | 1          |
| hsa-miR-6853 NM_002258  | KLRB1 | 1          |
| hsa-miR-6855 NM_002258  | KLRB1 | 1          |
| hsa-miR-6856 NM_002258  | KLRB1 | 1          |
| hsa-miR-6857 NM_002258  | KLRB1 | 1          |
| hsa-miR-6864 NM_002258  | KLRB1 | 1          |
| hsa-miR-6867 NM_002258  | KLRB1 | 1          |
| hsa-miR-6875 NM_002258  | KLRB1 | 1          |
| hsa-miR-6883 NM_002258  | KLRB1 | 1          |
| hsa-miR-6885 NM_002258  | KLRB1 | 1          |
| hsa-miR-6893 NM_002258  | KLRB1 | 1          |
| hsa-miR-7105 NM_002258  | KLRB1 | 1          |
| hsa-miR-7153 NM_002258  | KLRB1 | 1          |
| hsa-miR-7156 NM_002258  | KLRB1 | 1          |
| hsa-miR-7157 NM_002258  | KLRB1 | 1          |
| hsa-miR-6516 NM_002258  | KLRB1 | 1          |
| hsa-miR-7974 NM_002258  | KLRB1 | 1          |
| hsa-miR-8054 NM_002258  | KLRB1 | 1          |
| hsa-miR-8057 NM_002258  | KLRB1 | 1          |
| hsa-miR-8078 NM_002258  | KLRB1 | 1          |
| hsa-miR-1039 NM_002258  | KLRB1 | 1          |
| hsa-miR-1135 NM_002258  | KLRB1 | 1          |
| hsa-miR-674C NM_002272  | KRT4  | 0.95384615 |
| hsa-miR-6772 NM_002272  | KRT4  | 0.95384615 |
| hsa-miR-6808 NM_002272  | KRT4  | 0.95512821 |
| hsa-miR-1207 NM_002272  | KRT4  | 0.96153846 |
| hsa-miR-426C NM_002272  | KRT4  | 0.96153846 |
| hsa-miR-4508 NM_002272  | KRT4  | 0.96153846 |
| hsa-miR-6127 NM_002272  | KRT4  | 0.96153846 |
| hsa-miR-675C NM_002272  | KRT4  | 0.96153846 |
| hsa-miR-711C NM_002272  | KRT4  | 0.96153846 |
| hsa-miR-7114 NM_002272  | KRT4  | 0.96153846 |
| hsa-miR-6133 NM_002272  | KRT4  | 0.97435897 |
| hsa-let-7f-5p NM_002272 | KRT4  | 1          |
| hsa-miR-23a- NM_002272  | KRT4  | 1          |
| hsa-miR-27a- NM_002272  | KRT4  | 1          |
| hsa-miR-92a- NM_002272  | KRT4  | 1          |
| hsa-miR-197- NM_002272  | KRT4  | 1          |
| hsa-miR-148a NM_002272  | KRT4  | 1          |
| hsa-miR-30c- NM_002272  | KRT4  | 1          |
| hsa-miR-152- NM_002272  | KRT4  | 1          |
| hsa-miR-150- NM_002272  | KRT4  | 1          |
| hsa-miR-150- NM_002272  | KRT4  | 1          |
| hsa-miR-188- NM_002272  | KRT4  | 1          |

|                        |      |   |
|------------------------|------|---|
| hsa-miR-188- NM_002272 | KRT4 | 1 |
| hsa-miR-130b NM_002272 | KRT4 | 1 |
| hsa-miR-363- NM_002272 | KRT4 | 1 |
| hsa-miR-365a NM_002272 | KRT4 | 1 |
| hsa-miR-365a NM_002272 | KRT4 | 1 |
| hsa-miR-383- NM_002272 | KRT4 | 1 |
| hsa-miR-135b NM_002272 | KRT4 | 1 |
| hsa-miR-324- NM_002272 | KRT4 | 1 |
| hsa-miR-339- NM_002272 | KRT4 | 1 |
| hsa-miR-339- NM_002272 | KRT4 | 1 |
| hsa-miR-329- NM_002272 | KRT4 | 1 |
| hsa-miR-484 NM_002272  | KRT4 | 1 |
| hsa-miR-490- NM_002272 | KRT4 | 1 |
| hsa-miR-146b NM_002272 | KRT4 | 1 |
| hsa-miR-519c NM_002272 | KRT4 | 1 |
| hsa-miR-520a NM_002272 | KRT4 | 1 |
| hsa-miR-526b NM_002272 | KRT4 | 1 |
| hsa-miR-519b NM_002272 | KRT4 | 1 |
| hsa-miR-523- NM_002272 | KRT4 | 1 |
| hsa-miR-526a NM_002272 | KRT4 | 1 |
| hsa-miR-520c NM_002272 | KRT4 | 1 |
| hsa-miR-518e NM_002272 | KRT4 | 1 |
| hsa-miR-518d NM_002272 | KRT4 | 1 |
| hsa-miR-522- NM_002272 | KRT4 | 1 |
| hsa-miR-519a NM_002272 | KRT4 | 1 |
| hsa-miR-513a NM_002272 | KRT4 | 1 |
| hsa-miR-514a NM_002272 | KRT4 | 1 |
| hsa-miR-487b NM_002272 | KRT4 | 1 |
| hsa-miR-556- NM_002272 | KRT4 | 1 |
| hsa-miR-588 NM_002272  | KRT4 | 1 |
| hsa-miR-595 NM_002272  | KRT4 | 1 |
| hsa-miR-597- NM_002272 | KRT4 | 1 |
| hsa-miR-598- NM_002272 | KRT4 | 1 |
| hsa-miR-610 NM_002272  | KRT4 | 1 |
| hsa-miR-623 NM_002272  | KRT4 | 1 |
| hsa-miR-629- NM_002272 | KRT4 | 1 |
| hsa-miR-630 NM_002272  | KRT4 | 1 |
| hsa-miR-654- NM_002272 | KRT4 | 1 |
| hsa-miR-659- NM_002272 | KRT4 | 1 |
| hsa-miR-675- NM_002272 | KRT4 | 1 |
| hsa-miR-675- NM_002272 | KRT4 | 1 |
| hsa-miR-708- NM_002272 | KRT4 | 1 |
| hsa-miR-873- NM_002272 | KRT4 | 1 |
| hsa-miR-942- NM_002272 | KRT4 | 1 |
| hsa-miR-1178 NM_002272 | KRT4 | 1 |
| hsa-miR-1182 NM_002272 | KRT4 | 1 |
| hsa-miR-1225 NM_002272 | KRT4 | 1 |
| hsa-miR-1227 NM_002272 | KRT4 | 1 |
| hsa-miR-1228 NM_002272 | KRT4 | 1 |
| hsa-miR-1229 NM_002272 | KRT4 | 1 |
| hsa-miR-1233 NM_002272 | KRT4 | 1 |
| hsa-miR-1207 NM_002272 | KRT4 | 1 |
| hsa-miR-1207 NM_002272 | KRT4 | 1 |
| hsa-miR-1286 NM_002272 | KRT4 | 1 |
| hsa-miR-1249 NM_002272 | KRT4 | 1 |
| hsa-miR-1253 NM_002272 | KRT4 | 1 |
| hsa-miR-1268 NM_002272 | KRT4 | 1 |
| hsa-miR-1276 NM_002272 | KRT4 | 1 |
| hsa-miR-1276 NM_002272 | KRT4 | 1 |
| hsa-miR-513b NM_002272 | KRT4 | 1 |
| hsa-miR-320d NM_002272 | KRT4 | 1 |
| hsa-miR-1827 NM_002272 | KRT4 | 1 |
| hsa-miR-1909 NM_002272 | KRT4 | 1 |
| hsa-miR-1911 NM_002272 | KRT4 | 1 |
| hsa-miR-2114 NM_002272 | KRT4 | 1 |
| hsa-miR-2276 NM_002272 | KRT4 | 1 |
| hsa-miR-2277 NM_002272 | KRT4 | 1 |
| hsa-miR-2681 NM_002272 | KRT4 | 1 |
| hsa-miR-711 NM_002272  | KRT4 | 1 |
| hsa-miR-3131 NM_002272 | KRT4 | 1 |
| hsa-miR-3135 NM_002272 | KRT4 | 1 |
| hsa-miR-3141 NM_002272 | KRT4 | 1 |
| hsa-miR-3141 NM_002272 | KRT4 | 1 |
| hsa-miR-3150 NM_002272 | KRT4 | 1 |
| hsa-miR-3153 NM_002272 | KRT4 | 1 |
| hsa-miR-3162 NM_002272 | KRT4 | 1 |
| hsa-miR-3187 NM_002272 | KRT4 | 1 |
| hsa-miR-3192 NM_002272 | KRT4 | 1 |
| hsa-miR-3195 NM_002272 | KRT4 | 1 |
| hsa-miR-3198 NM_002272 | KRT4 | 1 |
| hsa-miR-4296 NM_002272 | KRT4 | 1 |
| hsa-miR-4314 NM_002272 | KRT4 | 1 |
| hsa-miR-4322 NM_002272 | KRT4 | 1 |
| hsa-miR-4281 NM_002272 | KRT4 | 1 |
| hsa-miR-3605 NM_002272 | KRT4 | 1 |
| hsa-miR-3621 NM_002272 | KRT4 | 1 |
| hsa-miR-3622 NM_002272 | KRT4 | 1 |
| hsa-miR-3667 NM_002272 | KRT4 | 1 |
| hsa-miR-3679 NM_002272 | KRT4 | 1 |
| hsa-miR-3681 NM_002272 | KRT4 | 1 |
| hsa-miR-3681 NM_002272 | KRT4 | 1 |
| hsa-miR-3689 NM_002272 | KRT4 | 1 |
| hsa-miR-3690 NM_002272 | KRT4 | 1 |
| hsa-miR-3689 NM_002272 | KRT4 | 1 |

|              |           |      |   |
|--------------|-----------|------|---|
| hsa-miR-1268 | NM_002272 | KRT4 | 1 |
| hsa-miR-378g | NM_002272 | KRT4 | 1 |
| hsa-miR-4433 | NM_002272 | KRT4 | 1 |
| hsa-miR-445C | NM_002272 | KRT4 | 1 |
| hsa-miR-4462 | NM_002272 | KRT4 | 1 |
| hsa-miR-4468 | NM_002272 | KRT4 | 1 |
| hsa-miR-4468 | NM_002272 | KRT4 | 1 |
| hsa-miR-3689 | NM_002272 | KRT4 | 1 |
| hsa-miR-4489 | NM_002272 | KRT4 | 1 |
| hsa-miR-4505 | NM_002272 | KRT4 | 1 |
| hsa-miR-4507 | NM_002272 | KRT4 | 1 |
| hsa-miR-451C | NM_002272 | KRT4 | 1 |
| hsa-miR-4514 | NM_002272 | KRT4 | 1 |
| hsa-miR-4515 | NM_002272 | KRT4 | 1 |
| hsa-miR-4525 | NM_002272 | KRT4 | 1 |
| hsa-miR-4534 | NM_002272 | KRT4 | 1 |
| hsa-miR-1587 | NM_002272 | KRT4 | 1 |
| hsa-miR-464C | NM_002272 | KRT4 | 1 |
| hsa-miR-4651 | NM_002272 | KRT4 | 1 |
| hsa-miR-4669 | NM_002272 | KRT4 | 1 |
| hsa-miR-4669 | NM_002272 | KRT4 | 1 |
| hsa-miR-4673 | NM_002272 | KRT4 | 1 |
| hsa-miR-4676 | NM_002272 | KRT4 | 1 |
| hsa-miR-4713 | NM_002272 | KRT4 | 1 |
| hsa-miR-4721 | NM_002272 | KRT4 | 1 |
| hsa-miR-4727 | NM_002272 | KRT4 | 1 |
| hsa-miR-4733 | NM_002272 | KRT4 | 1 |
| hsa-miR-4754 | NM_002272 | KRT4 | 1 |
| hsa-miR-4764 | NM_002272 | KRT4 | 1 |
| hsa-miR-4436 | NM_002272 | KRT4 | 1 |
| hsa-miR-4786 | NM_002272 | KRT4 | 1 |
| hsa-miR-4793 | NM_002272 | KRT4 | 1 |
| hsa-miR-5088 | NM_002272 | KRT4 | 1 |
| hsa-miR-5088 | NM_002272 | KRT4 | 1 |
| hsa-miR-5192 | NM_002272 | KRT4 | 1 |
| hsa-miR-5194 | NM_002272 | KRT4 | 1 |
| hsa-miR-5195 | NM_002272 | KRT4 | 1 |
| hsa-miR-5195 | NM_002272 | KRT4 | 1 |
| hsa-miR-5682 | NM_002272 | KRT4 | 1 |
| hsa-miR-5698 | NM_002272 | KRT4 | 1 |
| hsa-miR-5698 | NM_002272 | KRT4 | 1 |
| hsa-miR-5702 | NM_002272 | KRT4 | 1 |
| hsa-miR-6086 | NM_002272 | KRT4 | 1 |
| hsa-miR-6086 | NM_002272 | KRT4 | 1 |
| hsa-miR-613C | NM_002272 | KRT4 | 1 |
| hsa-miR-6132 | NM_002272 | KRT4 | 1 |
| hsa-miR-6165 | NM_002272 | KRT4 | 1 |
| hsa-miR-651C | NM_002272 | KRT4 | 1 |
| hsa-miR-6717 | NM_002272 | KRT4 | 1 |
| hsa-miR-6728 | NM_002272 | KRT4 | 1 |
| hsa-miR-6731 | NM_002272 | KRT4 | 1 |
| hsa-miR-6731 | NM_002272 | KRT4 | 1 |
| hsa-miR-6734 | NM_002272 | KRT4 | 1 |
| hsa-miR-6734 | NM_002272 | KRT4 | 1 |
| hsa-miR-6736 | NM_002272 | KRT4 | 1 |
| hsa-miR-6737 | NM_002272 | KRT4 | 1 |
| hsa-miR-6738 | NM_002272 | KRT4 | 1 |
| hsa-miR-674C | NM_002272 | KRT4 | 1 |
| hsa-miR-6741 | NM_002272 | KRT4 | 1 |
| hsa-miR-6743 | NM_002272 | KRT4 | 1 |
| hsa-miR-6748 | NM_002272 | KRT4 | 1 |
| hsa-miR-6753 | NM_002272 | KRT4 | 1 |
| hsa-miR-6753 | NM_002272 | KRT4 | 1 |
| hsa-miR-6754 | NM_002272 | KRT4 | 1 |
| hsa-miR-6757 | NM_002272 | KRT4 | 1 |
| hsa-miR-6758 | NM_002272 | KRT4 | 1 |
| hsa-miR-6761 | NM_002272 | KRT4 | 1 |
| hsa-miR-6773 | NM_002272 | KRT4 | 1 |
| hsa-miR-6776 | NM_002272 | KRT4 | 1 |
| hsa-miR-6778 | NM_002272 | KRT4 | 1 |
| hsa-miR-6784 | NM_002272 | KRT4 | 1 |
| hsa-miR-6785 | NM_002272 | KRT4 | 1 |
| hsa-miR-6785 | NM_002272 | KRT4 | 1 |
| hsa-miR-6792 | NM_002272 | KRT4 | 1 |
| hsa-miR-6794 | NM_002272 | KRT4 | 1 |
| hsa-miR-6795 | NM_002272 | KRT4 | 1 |
| hsa-miR-6795 | NM_002272 | KRT4 | 1 |
| hsa-miR-6801 | NM_002272 | KRT4 | 1 |
| hsa-miR-6802 | NM_002272 | KRT4 | 1 |
| hsa-miR-681C | NM_002272 | KRT4 | 1 |
| hsa-miR-681C | NM_002272 | KRT4 | 1 |
| hsa-miR-6814 | NM_002272 | KRT4 | 1 |
| hsa-miR-6814 | NM_002272 | KRT4 | 1 |
| hsa-miR-6817 | NM_002272 | KRT4 | 1 |
| hsa-miR-6825 | NM_002272 | KRT4 | 1 |
| hsa-miR-6833 | NM_002272 | KRT4 | 1 |
| hsa-miR-6839 | NM_002272 | KRT4 | 1 |
| hsa-miR-6847 | NM_002272 | KRT4 | 1 |
| hsa-miR-6849 | NM_002272 | KRT4 | 1 |
| hsa-miR-6851 | NM_002272 | KRT4 | 1 |
| hsa-miR-6856 | NM_002272 | KRT4 | 1 |
| hsa-miR-6769 | NM_002272 | KRT4 | 1 |
| hsa-miR-6769 | NM_002272 | KRT4 | 1 |
| hsa-miR-6865 | NM_002272 | KRT4 | 1 |
| hsa-miR-6871 | NM_002272 | KRT4 | 1 |
| hsa-miR-6881 | NM_002272 | KRT4 | 1 |

|                         |       |            |
|-------------------------|-------|------------|
| hsa-miR-6891 NM_002272  | KRT4  | 1          |
| hsa-miR-7106 NM_002272  | KRT4  | 1          |
| hsa-miR-7106 NM_002272  | KRT4  | 1          |
| hsa-miR-7107 NM_002272  | KRT4  | 1          |
| hsa-miR-7109 NM_002272  | KRT4  | 1          |
| hsa-miR-7109 NM_002272  | KRT4  | 1          |
| hsa-miR-711C NM_002272  | KRT4  | 1          |
| hsa-miR-7112 NM_002272  | KRT4  | 1          |
| hsa-miR-7845 NM_002272  | KRT4  | 1          |
| hsa-miR-7845 NM_002272  | KRT4  | 1          |
| hsa-miR-785C NM_002272  | KRT4  | 1          |
| hsa-miR-7856 NM_002272  | KRT4  | 1          |
| hsa-miR-7973 NM_002272  | KRT4  | 1          |
| hsa-miR-806C NM_002272  | KRT4  | 1          |
| hsa-miR-8074 NM_002272  | KRT4  | 1          |
| hsa-miR-8085 NM_002272  | KRT4  | 1          |
| hsa-miR-9718 NM_002272  | KRT4  | 1          |
| hsa-miR-1035 NM_002272  | KRT4  | 1          |
| hsa-miR-9983 NM_002272  | KRT4  | 1          |
| hsa-miR-3055 NM_002272  | KRT4  | 1          |
| hsa-miR-1211 NM_002272  | KRT4  | 1          |
| hsa-miR-1211 NM_002272  | KRT4  | 1          |
| hsa-miR-1211 NM_002272  | KRT4  | 1          |
| hsa-miR-6864 NM_002291  | LAMB1 | 1          |
| hsa-miR-431- NM_009588  | LTB   | 0.96153846 |
| hsa-miR-770- NM_009588  | LTB   | 0.96153846 |
| hsa-miR-6851 NM_009588  | LTB   | 0.96153846 |
| hsa-miR-1911 NM_009588  | LTB   | 0.97435897 |
| hsa-miR-4445 NM_009588  | LTB   | 0.98076923 |
| hsa-miR-23a- NM_002341  | LTB   | 1          |
| hsa-miR-107 NM_002341   | LTB   | 1          |
| hsa-miR-132- NM_002341  | LTB   | 1          |
| hsa-miR-188- NM_002341  | LTB   | 1          |
| hsa-miR-195- NM_002341  | LTB   | 1          |
| hsa-miR-323a NM_002341  | LTB   | 1          |
| hsa-miR-193b NM_002341  | LTB   | 1          |
| hsa-miR-608 NM_002341   | LTB   | 1          |
| hsa-miR-624- NM_002341  | LTB   | 1          |
| hsa-miR-637 NM_002341   | LTB   | 1          |
| hsa-miR-659- NM_002341  | LTB   | 1          |
| hsa-miR-1182 NM_002341  | LTB   | 1          |
| hsa-miR-1237 NM_002341  | LTB   | 1          |
| hsa-miR-1292 NM_002341  | LTB   | 1          |
| hsa-miR-3177 NM_002341  | LTB   | 1          |
| hsa-miR-3187 NM_002341  | LTB   | 1          |
| hsa-miR-444C NM_002341  | LTB   | 1          |
| hsa-miR-4492 NM_002341  | LTB   | 1          |
| hsa-miR-4651 NM_002341  | LTB   | 1          |
| hsa-miR-4754 NM_002341  | LTB   | 1          |
| hsa-miR-6071 NM_002341  | LTB   | 1          |
| hsa-miR-6505 NM_002341  | LTB   | 1          |
| hsa-miR-6742 NM_002341  | LTB   | 1          |
| hsa-miR-6793 NM_002341  | LTB   | 1          |
| hsa-miR-682C NM_002341  | LTB   | 1          |
| hsa-miR-6852 NM_002341  | LTB   | 1          |
| hsa-miR-6868 NM_002341  | LTB   | 1          |
| hsa-miR-689C NM_002341  | LTB   | 1          |
| hsa-miR-7155 NM_002341  | LTB   | 1          |
| hsa-miR-7156 NM_002341  | LTB   | 1          |
| hsa-miR-8074 NM_002341  | LTB   | 1          |
| hsa-let-7b-3p NM_009588 | LTB   | 1          |
| hsa-let-7e-3p NM_009588 | LTB   | 1          |
| hsa-miR-23a- NM_009588  | LTB   | 1          |
| hsa-miR-25-3j NM_009588 | LTB   | 1          |
| hsa-miR-107 NM_009588   | LTB   | 1          |
| hsa-miR-208a NM_009588  | LTB   | 1          |
| hsa-miR-129- NM_009588  | LTB   | 1          |
| hsa-miR-129- NM_009588  | LTB   | 1          |
| hsa-miR-139- NM_009588  | LTB   | 1          |
| hsa-miR-187- NM_009588  | LTB   | 1          |
| hsa-miR-204- NM_009588  | LTB   | 1          |
| hsa-miR-205- NM_009588  | LTB   | 1          |
| hsa-miR-212- NM_009588  | LTB   | 1          |
| hsa-miR-132- NM_009588  | LTB   | 1          |
| hsa-miR-132- NM_009588  | LTB   | 1          |
| hsa-miR-138- NM_009588  | LTB   | 1          |
| hsa-miR-129- NM_009588  | LTB   | 1          |
| hsa-miR-134- NM_009588  | LTB   | 1          |
| hsa-miR-188- NM_009588  | LTB   | 1          |
| hsa-miR-195- NM_009588  | LTB   | 1          |
| hsa-miR-34c- NM_009588  | LTB   | 1          |
| hsa-miR-323a NM_009588  | LTB   | 1          |
| hsa-miR-490- NM_009588  | LTB   | 1          |
| hsa-miR-146b NM_009588  | LTB   | 1          |
| hsa-miR-193b NM_009588  | LTB   | 1          |
| hsa-miR-520d NM_009588  | LTB   | 1          |
| hsa-miR-520d NM_009588  | LTB   | 1          |
| hsa-miR-500a NM_009588  | LTB   | 1          |
| hsa-miR-507 NM_009588   | LTB   | 1          |
| hsa-miR-508- NM_009588  | LTB   | 1          |
| hsa-miR-579- NM_009588  | LTB   | 1          |
| hsa-miR-589- NM_009588  | LTB   | 1          |
| hsa-miR-596 NM_009588   | LTB   | 1          |
| hsa-miR-596 NM_009588   | LTB   | 1          |



|              |           |     |   |
|--------------|-----------|-----|---|
| hsa-miR-608  | NM_009588 | LTB | 1 |
| hsa-miR-615- | NM_009588 | LTB | 1 |
| hsa-miR-615- | NM_009588 | LTB | 1 |
| hsa-miR-618  | NM_009588 | LTB | 1 |
| hsa-miR-624- | NM_009588 | LTB | 1 |
| hsa-miR-629- | NM_009588 | LTB | 1 |
| hsa-miR-630  | NM_009588 | LTB | 1 |
| hsa-miR-637  | NM_009588 | LTB | 1 |
| hsa-miR-650  | NM_009588 | LTB | 1 |
| hsa-miR-659- | NM_009588 | LTB | 1 |
| hsa-miR-668- | NM_009588 | LTB | 1 |
| hsa-miR-767- | NM_009588 | LTB | 1 |
| hsa-miR-767- | NM_009588 | LTB | 1 |
| hsa-miR-454- | NM_009588 | LTB | 1 |
| hsa-miR-675- | NM_009588 | LTB | 1 |
| hsa-miR-920  | NM_009588 | LTB | 1 |
| hsa-miR-118C | NM_009588 | LTB | 1 |
| hsa-miR-1181 | NM_009588 | LTB | 1 |
| hsa-miR-1182 | NM_009588 | LTB | 1 |
| hsa-miR-1227 | NM_009588 | LTB | 1 |
| hsa-miR-1237 | NM_009588 | LTB | 1 |
| hsa-miR-1238 | NM_009588 | LTB | 1 |
| hsa-miR-1207 | NM_009588 | LTB | 1 |
| hsa-miR-1292 | NM_009588 | LTB | 1 |
| hsa-miR-1908 | NM_009588 | LTB | 1 |
| hsa-miR-1911 | NM_009588 | LTB | 1 |
| hsa-miR-1913 | NM_009588 | LTB | 1 |
| hsa-miR-211C | NM_009588 | LTB | 1 |
| hsa-miR-2276 | NM_009588 | LTB | 1 |
| hsa-miR-3124 | NM_009588 | LTB | 1 |
| hsa-miR-3127 | NM_009588 | LTB | 1 |
| hsa-miR-3142 | NM_009588 | LTB | 1 |
| hsa-miR-3162 | NM_009588 | LTB | 1 |
| hsa-miR-323b | NM_009588 | LTB | 1 |
| hsa-miR-3177 | NM_009588 | LTB | 1 |
| hsa-miR-3065 | NM_009588 | LTB | 1 |
| hsa-miR-3187 | NM_009588 | LTB | 1 |
| hsa-miR-319C | NM_009588 | LTB | 1 |
| hsa-miR-3191 | NM_009588 | LTB | 1 |
| hsa-miR-4253 | NM_009588 | LTB | 1 |
| hsa-miR-432e | NM_009588 | LTB | 1 |
| hsa-miR-4264 | NM_009588 | LTB | 1 |
| hsa-miR-4284 | NM_009588 | LTB | 1 |
| hsa-miR-3615 | NM_009588 | LTB | 1 |
| hsa-miR-3677 | NM_009588 | LTB | 1 |
| hsa-miR-3685 | NM_009588 | LTB | 1 |
| hsa-miR-3925 | NM_009588 | LTB | 1 |
| hsa-miR-3944 | NM_009588 | LTB | 1 |
| hsa-miR-444C | NM_009588 | LTB | 1 |
| hsa-miR-4462 | NM_009588 | LTB | 1 |
| hsa-miR-4492 | NM_009588 | LTB | 1 |
| hsa-miR-4632 | NM_009588 | LTB | 1 |
| hsa-miR-4632 | NM_009588 | LTB | 1 |
| hsa-miR-4633 | NM_009588 | LTB | 1 |
| hsa-miR-4633 | NM_009588 | LTB | 1 |
| hsa-miR-4635 | NM_009588 | LTB | 1 |
| hsa-miR-4641 | NM_009588 | LTB | 1 |
| hsa-miR-4641 | NM_009588 | LTB | 1 |
| hsa-miR-4655 | NM_009588 | LTB | 1 |
| hsa-miR-4664 | NM_009588 | LTB | 1 |
| hsa-miR-4664 | NM_009588 | LTB | 1 |
| hsa-miR-4711 | NM_009588 | LTB | 1 |
| hsa-miR-4713 | NM_009588 | LTB | 1 |
| hsa-miR-4713 | NM_009588 | LTB | 1 |
| hsa-miR-4723 | NM_009588 | LTB | 1 |
| hsa-miR-4725 | NM_009588 | LTB | 1 |
| hsa-miR-475C | NM_009588 | LTB | 1 |
| hsa-miR-4754 | NM_009588 | LTB | 1 |
| hsa-miR-4755 | NM_009588 | LTB | 1 |
| hsa-miR-4756 | NM_009588 | LTB | 1 |
| hsa-miR-4756 | NM_009588 | LTB | 1 |
| hsa-miR-4776 | NM_009588 | LTB | 1 |
| hsa-miR-4783 | NM_009588 | LTB | 1 |
| hsa-miR-4793 | NM_009588 | LTB | 1 |
| hsa-miR-4804 | NM_009588 | LTB | 1 |
| hsa-miR-5002 | NM_009588 | LTB | 1 |
| hsa-miR-5185 | NM_009588 | LTB | 1 |
| hsa-miR-664b | NM_009588 | LTB | 1 |
| hsa-miR-1295 | NM_009588 | LTB | 1 |
| hsa-miR-5591 | NM_009588 | LTB | 1 |
| hsa-miR-6071 | NM_009588 | LTB | 1 |
| hsa-miR-6081 | NM_009588 | LTB | 1 |
| hsa-miR-6085 | NM_009588 | LTB | 1 |
| hsa-miR-6505 | NM_009588 | LTB | 1 |
| hsa-miR-6511 | NM_009588 | LTB | 1 |
| hsa-miR-6731 | NM_009588 | LTB | 1 |
| hsa-miR-6735 | NM_009588 | LTB | 1 |
| hsa-miR-674C | NM_009588 | LTB | 1 |
| hsa-miR-6742 | NM_009588 | LTB | 1 |
| hsa-miR-674e | NM_009588 | LTB | 1 |
| hsa-miR-6748 | NM_009588 | LTB | 1 |
| hsa-miR-6754 | NM_009588 | LTB | 1 |
| hsa-miR-6756 | NM_009588 | LTB | 1 |
| hsa-miR-6758 | NM_009588 | LTB | 1 |

|                         |      |            |
|-------------------------|------|------------|
| hsa-miR-6762 NM_009588  | LTB  | 1          |
| hsa-miR-6763 NM_009588  | LTB  | 1          |
| hsa-miR-6766 NM_009588  | LTB  | 1          |
| hsa-miR-6774 NM_009588  | LTB  | 1          |
| hsa-miR-6775 NM_009588  | LTB  | 1          |
| hsa-miR-6784 NM_009588  | LTB  | 1          |
| hsa-miR-6785 NM_009588  | LTB  | 1          |
| hsa-miR-6787 NM_009588  | LTB  | 1          |
| hsa-miR-6787 NM_009588  | LTB  | 1          |
| hsa-miR-6793 NM_009588  | LTB  | 1          |
| hsa-miR-6801 NM_009588  | LTB  | 1          |
| hsa-miR-6804 NM_009588  | LTB  | 1          |
| hsa-miR-6811 NM_009588  | LTB  | 1          |
| hsa-miR-6818 NM_009588  | LTB  | 1          |
| hsa-miR-682C NM_009588  | LTB  | 1          |
| hsa-miR-6821 NM_009588  | LTB  | 1          |
| hsa-miR-6825 NM_009588  | LTB  | 1          |
| hsa-miR-6833 NM_009588  | LTB  | 1          |
| hsa-miR-678C NM_009588  | LTB  | 1          |
| hsa-miR-6838 NM_009588  | LTB  | 1          |
| hsa-miR-6848 NM_009588  | LTB  | 1          |
| hsa-miR-6865 NM_009588  | LTB  | 1          |
| hsa-miR-6867 NM_009588  | LTB  | 1          |
| hsa-miR-6868 NM_009588  | LTB  | 1          |
| hsa-miR-6875 NM_009588  | LTB  | 1          |
| hsa-miR-689C NM_009588  | LTB  | 1          |
| hsa-miR-6895 NM_009588  | LTB  | 1          |
| hsa-miR-711C NM_009588  | LTB  | 1          |
| hsa-miR-7155 NM_009588  | LTB  | 1          |
| hsa-miR-7156 NM_009588  | LTB  | 1          |
| hsa-miR-7158 NM_009588  | LTB  | 1          |
| hsa-miR-7843 NM_009588  | LTB  | 1          |
| hsa-miR-1039 NM_009588  | LTB  | 1          |
| hsa-miR-1039 NM_009588  | LTB  | 1          |
| hsa-miR-104C NM_009588  | LTB  | 1          |
| hsa-miR-1211 NM_009588  | LTB  | 1          |
| hsa-miR-1212 NM_009588  | LTB  | 1          |
| hsa-miR-1271 NM_002422  | MMP3 | 0.95384615 |
| hsa-miR-6767 NM_002422  | MMP3 | 0.97435897 |
| hsa-miR-6767 NM_002422  | MMP3 | 0.98076923 |
| hsa-miR-18a- NM_002422  | MMP3 | 1          |
| hsa-miR-18a- NM_002422  | MMP3 | 1          |
| hsa-miR-25-5j NM_002422 | MMP3 | 1          |
| hsa-miR-139- NM_002422  | MMP3 | 1          |
| hsa-miR-183- NM_002422  | MMP3 | 1          |
| hsa-miR-212- NM_002422  | MMP3 | 1          |
| hsa-miR-214- NM_002422  | MMP3 | 1          |
| hsa-miR-154- NM_002422  | MMP3 | 1          |
| hsa-miR-29c- NM_002422  | MMP3 | 1          |
| hsa-miR-302a NM_002422  | MMP3 | 1          |
| hsa-miR-381- NM_002422  | MMP3 | 1          |
| hsa-miR-18b- NM_002422  | MMP3 | 1          |
| hsa-miR-495- NM_002422  | MMP3 | 1          |
| hsa-miR-515- NM_002422  | MMP3 | 1          |
| hsa-miR-520f NM_002422  | MMP3 | 1          |
| hsa-miR-520t NM_002422  | MMP3 | 1          |
| hsa-miR-520c NM_002422  | MMP3 | 1          |
| hsa-miR-520d NM_002422  | MMP3 | 1          |
| hsa-miR-520h NM_002422  | MMP3 | 1          |
| hsa-miR-572 NM_002422   | MMP3 | 1          |
| hsa-miR-595 NM_002422   | MMP3 | 1          |
| hsa-miR-602 NM_002422   | MMP3 | 1          |
| hsa-miR-646 NM_002422   | MMP3 | 1          |
| hsa-miR-650 NM_002422   | MMP3 | 1          |
| hsa-miR-744- NM_002422  | MMP3 | 1          |
| hsa-miR-936 NM_002422   | MMP3 | 1          |
| hsa-miR-1178 NM_002422  | MMP3 | 1          |
| hsa-miR-1182 NM_002422  | MMP3 | 1          |
| hsa-miR-1231 NM_002422  | MMP3 | 1          |
| hsa-miR-1276 NM_002422  | MMP3 | 1          |
| hsa-miR-1972 NM_002422  | MMP3 | 1          |
| hsa-miR-2277 NM_002422  | MMP3 | 1          |
| hsa-miR-3117 NM_002422  | MMP3 | 1          |
| hsa-miR-3153 NM_002422  | MMP3 | 1          |
| hsa-miR-316C NM_002422  | MMP3 | 1          |
| hsa-miR-3197 NM_002422  | MMP3 | 1          |
| hsa-miR-3197 NM_002422  | MMP3 | 1          |
| hsa-miR-4294 NM_002422  | MMP3 | 1          |
| hsa-miR-4298 NM_002422  | MMP3 | 1          |
| hsa-miR-4265 NM_002422  | MMP3 | 1          |
| hsa-miR-500t NM_002422  | MMP3 | 1          |
| hsa-miR-3615 NM_002422  | MMP3 | 1          |
| hsa-miR-3663 NM_002422  | MMP3 | 1          |
| hsa-miR-3675 NM_002422  | MMP3 | 1          |
| hsa-miR-3681 NM_002422  | MMP3 | 1          |
| hsa-miR-442C NM_002422  | MMP3 | 1          |
| hsa-miR-4435 NM_002422  | MMP3 | 1          |
| hsa-miR-4436 NM_002422  | MMP3 | 1          |
| hsa-miR-4444 NM_002422  | MMP3 | 1          |
| hsa-miR-4454 NM_002422  | MMP3 | 1          |
| hsa-miR-4466 NM_002422  | MMP3 | 1          |
| hsa-miR-4484 NM_002422  | MMP3 | 1          |
| hsa-miR-4514 NM_002422  | MMP3 | 1          |
| hsa-miR-4525 NM_002422  | MMP3 | 1          |

|                        |      |            |
|------------------------|------|------------|
| hsa-miR-453C NM_002422 | MMP3 | 1          |
| hsa-miR-4537 NM_002422 | MMP3 | 1          |
| hsa-miR-396C NM_002422 | MMP3 | 1          |
| hsa-miR-4641 NM_002422 | MMP3 | 1          |
| hsa-miR-4673 NM_002422 | MMP3 | 1          |
| hsa-miR-4674 NM_002422 | MMP3 | 1          |
| hsa-miR-469C NM_002422 | MMP3 | 1          |
| hsa-miR-4717 NM_002422 | MMP3 | 1          |
| hsa-miR-4731 NM_002422 | MMP3 | 1          |
| hsa-miR-4732 NM_002422 | MMP3 | 1          |
| hsa-miR-4774 NM_002422 | MMP3 | 1          |
| hsa-miR-5006 NM_002422 | MMP3 | 1          |
| hsa-miR-5094 NM_002422 | MMP3 | 1          |
| hsa-miR-5189 NM_002422 | MMP3 | 1          |
| hsa-miR-5693 NM_002422 | MMP3 | 1          |
| hsa-miR-5707 NM_002422 | MMP3 | 1          |
| hsa-miR-5739 NM_002422 | MMP3 | 1          |
| hsa-miR-6125 NM_002422 | MMP3 | 1          |
| hsa-miR-6165 NM_002422 | MMP3 | 1          |
| hsa-miR-6495 NM_002422 | MMP3 | 1          |
| hsa-miR-6727 NM_002422 | MMP3 | 1          |
| hsa-miR-6747 NM_002422 | MMP3 | 1          |
| hsa-miR-6762 NM_002422 | MMP3 | 1          |
| hsa-miR-6787 NM_002422 | MMP3 | 1          |
| hsa-miR-680C NM_002422 | MMP3 | 1          |
| hsa-miR-6806 NM_002422 | MMP3 | 1          |
| hsa-miR-6829 NM_002422 | MMP3 | 1          |
| hsa-miR-6863 NM_002422 | MMP3 | 1          |
| hsa-miR-7108 NM_002422 | MMP3 | 1          |
| hsa-miR-715C NM_002422 | MMP3 | 1          |
| hsa-miR-7706 NM_002422 | MMP3 | 1          |
| hsa-miR-8057 NM_002422 | MMP3 | 1          |
| hsa-miR-6529 NM_002422 | MMP3 | 1          |
| hsa-miR-9851 NM_002422 | MMP3 | 1          |
| hsa-miR-5705 NM_002443 | MSMB | 0.96153846 |
| hsa-miR-6866 NM_138634 | MSMB | 0.97435897 |
| hsa-miR-6866 NM_002443 | MSMB | 0.97435897 |
| hsa-miR-198 NM_138634  | MSMB | 1          |
| hsa-miR-125t NM_138634 | MSMB | 1          |
| hsa-miR-135a NM_138634 | MSMB | 1          |
| hsa-miR-378a NM_138634 | MSMB | 1          |
| hsa-miR-423- NM_138634 | MSMB | 1          |
| hsa-miR-550a NM_138634 | MSMB | 1          |
| hsa-miR-637 NM_138634  | MSMB | 1          |
| hsa-miR-1296 NM_138634 | MSMB | 1          |
| hsa-miR-877- NM_138634 | MSMB | 1          |
| hsa-miR-1227 NM_138634 | MSMB | 1          |
| hsa-miR-1229 NM_138634 | MSMB | 1          |
| hsa-miR-1233 NM_138634 | MSMB | 1          |
| hsa-miR-1307 NM_138634 | MSMB | 1          |
| hsa-miR-191C NM_138634 | MSMB | 1          |
| hsa-miR-3131 NM_138634 | MSMB | 1          |
| hsa-miR-3132 NM_138634 | MSMB | 1          |
| hsa-miR-378t NM_138634 | MSMB | 1          |
| hsa-miR-3137 NM_138634 | MSMB | 1          |
| hsa-miR-319C NM_138634 | MSMB | 1          |
| hsa-miR-3197 NM_138634 | MSMB | 1          |
| hsa-miR-4259 NM_138634 | MSMB | 1          |
| hsa-miR-362C NM_138634 | MSMB | 1          |
| hsa-miR-3922 NM_138634 | MSMB | 1          |
| hsa-miR-3944 NM_138634 | MSMB | 1          |
| hsa-miR-443C NM_138634 | MSMB | 1          |
| hsa-miR-4466 NM_138634 | MSMB | 1          |
| hsa-miR-4651 NM_138634 | MSMB | 1          |
| hsa-miR-4664 NM_138634 | MSMB | 1          |
| hsa-miR-4687 NM_138634 | MSMB | 1          |
| hsa-miR-4688 NM_138634 | MSMB | 1          |
| hsa-miR-4689 NM_138634 | MSMB | 1          |
| hsa-miR-4707 NM_138634 | MSMB | 1          |
| hsa-miR-4728 NM_138634 | MSMB | 1          |
| hsa-miR-473C NM_138634 | MSMB | 1          |
| hsa-miR-4743 NM_138634 | MSMB | 1          |
| hsa-miR-4745 NM_138634 | MSMB | 1          |
| hsa-miR-4747 NM_138634 | MSMB | 1          |
| hsa-miR-5011 NM_138634 | MSMB | 1          |
| hsa-miR-6076 NM_138634 | MSMB | 1          |
| hsa-miR-6165 NM_138634 | MSMB | 1          |
| hsa-miR-651C NM_138634 | MSMB | 1          |
| hsa-miR-6716 NM_138634 | MSMB | 1          |
| hsa-miR-6718 NM_138634 | MSMB | 1          |
| hsa-miR-6727 NM_138634 | MSMB | 1          |
| hsa-miR-6728 NM_138634 | MSMB | 1          |
| hsa-miR-6741 NM_138634 | MSMB | 1          |
| hsa-miR-6742 NM_138634 | MSMB | 1          |
| hsa-miR-6763 NM_138634 | MSMB | 1          |
| hsa-miR-6764 NM_138634 | MSMB | 1          |
| hsa-miR-677C NM_138634 | MSMB | 1          |
| hsa-miR-6772 NM_138634 | MSMB | 1          |
| hsa-miR-6774 NM_138634 | MSMB | 1          |
| hsa-miR-6778 NM_138634 | MSMB | 1          |
| hsa-miR-6782 NM_138634 | MSMB | 1          |
| hsa-miR-6798 NM_138634 | MSMB | 1          |
| hsa-miR-6831 NM_138634 | MSMB | 1          |
| hsa-miR-6845 NM_138634 | MSMB | 1          |

|                        |         |            |
|------------------------|---------|------------|
| hsa-miR-6846 NM_138634 | MSMB    | 1          |
| hsa-miR-6848 NM_138634 | MSMB    | 1          |
| hsa-miR-7106 NM_138634 | MSMB    | 1          |
| hsa-miR-7107 NM_138634 | MSMB    | 1          |
| hsa-miR-7111 NM_138634 | MSMB    | 1          |
| hsa-miR-7155 NM_138634 | MSMB    | 1          |
| hsa-miR-7160 NM_138634 | MSMB    | 1          |
| hsa-miR-7849 NM_138634 | MSMB    | 1          |
| hsa-miR-1039 NM_138634 | MSMB    | 1          |
| hsa-miR-3085 NM_138634 | MSMB    | 1          |
| hsa-miR-1212 NM_138634 | MSMB    | 1          |
| hsa-miR-197- NM_002443 | MSMB    | 1          |
| hsa-miR-198 NM_002443  | MSMB    | 1          |
| hsa-miR-125b NM_002443 | MSMB    | 1          |
| hsa-miR-135a NM_002443 | MSMB    | 1          |
| hsa-miR-134- NM_002443 | MSMB    | 1          |
| hsa-miR-378a NM_002443 | MSMB    | 1          |
| hsa-miR-423- NM_002443 | MSMB    | 1          |
| hsa-miR-550a NM_002443 | MSMB    | 1          |
| hsa-miR-601 NM_002443  | MSMB    | 1          |
| hsa-miR-637 NM_002443  | MSMB    | 1          |
| hsa-miR-647 NM_002443  | MSMB    | 1          |
| hsa-miR-1296 NM_002443 | MSMB    | 1          |
| hsa-miR-877- NM_002443 | MSMB    | 1          |
| hsa-miR-1229 NM_002443 | MSMB    | 1          |
| hsa-miR-1238 NM_002443 | MSMB    | 1          |
| hsa-miR-1307 NM_002443 | MSMB    | 1          |
| hsa-miR-1914 NM_002443 | MSMB    | 1          |
| hsa-miR-3120 NM_002443 | MSMB    | 1          |
| hsa-miR-3132 NM_002443 | MSMB    | 1          |
| hsa-miR-378b NM_002443 | MSMB    | 1          |
| hsa-miR-3190 NM_002443 | MSMB    | 1          |
| hsa-miR-3197 NM_002443 | MSMB    | 1          |
| hsa-miR-3622 NM_002443 | MSMB    | 1          |
| hsa-miR-3652 NM_002443 | MSMB    | 1          |
| hsa-miR-3922 NM_002443 | MSMB    | 1          |
| hsa-miR-3944 NM_002443 | MSMB    | 1          |
| hsa-miR-4430 NM_002443 | MSMB    | 1          |
| hsa-miR-4463 NM_002443 | MSMB    | 1          |
| hsa-miR-4466 NM_002443 | MSMB    | 1          |
| hsa-miR-4651 NM_002443 | MSMB    | 1          |
| hsa-miR-4687 NM_002443 | MSMB    | 1          |
| hsa-miR-4689 NM_002443 | MSMB    | 1          |
| hsa-miR-4707 NM_002443 | MSMB    | 1          |
| hsa-miR-4728 NM_002443 | MSMB    | 1          |
| hsa-miR-4730 NM_002443 | MSMB    | 1          |
| hsa-miR-4731 NM_002443 | MSMB    | 1          |
| hsa-miR-4743 NM_002443 | MSMB    | 1          |
| hsa-miR-4745 NM_002443 | MSMB    | 1          |
| hsa-miR-4761 NM_002443 | MSMB    | 1          |
| hsa-miR-5011 NM_002443 | MSMB    | 1          |
| hsa-miR-6085 NM_002443 | MSMB    | 1          |
| hsa-miR-6089 NM_002443 | MSMB    | 1          |
| hsa-miR-6090 NM_002443 | MSMB    | 1          |
| hsa-miR-6131 NM_002443 | MSMB    | 1          |
| hsa-miR-6165 NM_002443 | MSMB    | 1          |
| hsa-miR-6510 NM_002443 | MSMB    | 1          |
| hsa-miR-6716 NM_002443 | MSMB    | 1          |
| hsa-miR-6718 NM_002443 | MSMB    | 1          |
| hsa-miR-6727 NM_002443 | MSMB    | 1          |
| hsa-miR-6728 NM_002443 | MSMB    | 1          |
| hsa-miR-6734 NM_002443 | MSMB    | 1          |
| hsa-miR-6741 NM_002443 | MSMB    | 1          |
| hsa-miR-6749 NM_002443 | MSMB    | 1          |
| hsa-miR-6752 NM_002443 | MSMB    | 1          |
| hsa-miR-6756 NM_002443 | MSMB    | 1          |
| hsa-miR-6764 NM_002443 | MSMB    | 1          |
| hsa-miR-6770 NM_002443 | MSMB    | 1          |
| hsa-miR-6770 NM_002443 | MSMB    | 1          |
| hsa-miR-6774 NM_002443 | MSMB    | 1          |
| hsa-miR-6775 NM_002443 | MSMB    | 1          |
| hsa-miR-6782 NM_002443 | MSMB    | 1          |
| hsa-miR-6798 NM_002443 | MSMB    | 1          |
| hsa-miR-6824 NM_002443 | MSMB    | 1          |
| hsa-miR-6831 NM_002443 | MSMB    | 1          |
| hsa-miR-6846 NM_002443 | MSMB    | 1          |
| hsa-miR-6849 NM_002443 | MSMB    | 1          |
| hsa-miR-6856 NM_002443 | MSMB    | 1          |
| hsa-miR-6893 NM_002443 | MSMB    | 1          |
| hsa-miR-7106 NM_002443 | MSMB    | 1          |
| hsa-miR-7107 NM_002443 | MSMB    | 1          |
| hsa-miR-7111 NM_002443 | MSMB    | 1          |
| hsa-miR-7114 NM_002443 | MSMB    | 1          |
| hsa-miR-7849 NM_002443 | MSMB    | 1          |
| hsa-miR-1039 NM_002443 | MSMB    | 1          |
| hsa-miR-3085 NM_002443 | MSMB    | 1          |
| hsa-miR-1212 NM_002443 | MSMB    | 1          |
| hsa-miR-218- NM_002483 | CEACAM6 | 0.96153846 |
| hsa-miR-33b- NM_002483 | CEACAM6 | 0.96153846 |
| hsa-miR-5011 NM_002483 | CEACAM6 | 0.96153846 |
| hsa-miR-892c NM_002483 | CEACAM6 | 0.96153846 |
| hsa-miR-8063 NM_002483 | CEACAM6 | 0.96153846 |
| hsa-miR-8072 NM_002483 | CEACAM6 | 0.96153846 |
| hsa-miR-1469 NM_002483 | CEACAM6 | 0.98076923 |

|                |           |         |            |
|----------------|-----------|---------|------------|
| hsa-miR-470c   | NM_002483 | CEACAM6 | 0.98076923 |
| hsa-miR-320c   | NM_002483 | CEACAM6 | 0.98461539 |
| hsa-let-7a-2-3 | NM_002483 | CEACAM6 | 1          |
| hsa-miR-25-5j  | NM_002483 | CEACAM6 | 1          |
| hsa-miR-28-3j  | NM_002483 | CEACAM6 | 1          |
| hsa-miR-31-5j  | NM_002483 | CEACAM6 | 1          |
| hsa-miR-30c-4  | NM_002483 | CEACAM6 | 1          |
| hsa-miR-139-   | NM_002483 | CEACAM6 | 1          |
| hsa-miR-210-   | NM_002483 | CEACAM6 | 1          |
| hsa-miR-211-   | NM_002483 | CEACAM6 | 1          |
| hsa-miR-216a   | NM_002483 | CEACAM6 | 1          |
| hsa-miR-218-   | NM_002483 | CEACAM6 | 1          |
| hsa-let-7g-3p  | NM_002483 | CEACAM6 | 1          |
| hsa-miR-23b-   | NM_002483 | CEACAM6 | 1          |
| hsa-miR-122-   | NM_002483 | CEACAM6 | 1          |
| hsa-miR-140-   | NM_002483 | CEACAM6 | 1          |
| hsa-miR-143-   | NM_002483 | CEACAM6 | 1          |
| hsa-miR-191-   | NM_002483 | CEACAM6 | 1          |
| hsa-miR-125a   | NM_002483 | CEACAM6 | 1          |
| hsa-miR-138-   | NM_002483 | CEACAM6 | 1          |
| hsa-miR-150-   | NM_002483 | CEACAM6 | 1          |
| hsa-miR-186-   | NM_002483 | CEACAM6 | 1          |
| hsa-miR-128-   | NM_002483 | CEACAM6 | 1          |
| hsa-miR-29c-4  | NM_002483 | CEACAM6 | 1          |
| hsa-miR-34b-   | NM_002483 | CEACAM6 | 1          |
| hsa-miR-363-   | NM_002483 | CEACAM6 | 1          |
| hsa-miR-328-   | NM_002483 | CEACAM6 | 1          |
| hsa-miR-324-   | NM_002483 | CEACAM6 | 1          |
| hsa-miR-423-   | NM_002483 | CEACAM6 | 1          |
| hsa-miR-423-   | NM_002483 | CEACAM6 | 1          |
| hsa-miR-433-   | NM_002483 | CEACAM6 | 1          |
| hsa-miR-409-   | NM_002483 | CEACAM6 | 1          |
| hsa-miR-486-   | NM_002483 | CEACAM6 | 1          |
| hsa-miR-432-   | NM_002483 | CEACAM6 | 1          |
| hsa-miR-432-   | NM_002483 | CEACAM6 | 1          |
| hsa-miR-525-   | NM_002483 | CEACAM6 | 1          |
| hsa-miR-523-   | NM_002483 | CEACAM6 | 1          |
| hsa-miR-524-   | NM_002483 | CEACAM6 | 1          |
| hsa-miR-500a   | NM_002483 | CEACAM6 | 1          |
| hsa-miR-503-   | NM_002483 | CEACAM6 | 1          |
| hsa-miR-506-   | NM_002483 | CEACAM6 | 1          |
| hsa-miR-532-   | NM_002483 | CEACAM6 | 1          |
| hsa-miR-557    | NM_002483 | CEACAM6 | 1          |
| hsa-miR-575    | NM_002483 | CEACAM6 | 1          |
| hsa-miR-587    | NM_002483 | CEACAM6 | 1          |
| hsa-miR-550a   | NM_002483 | CEACAM6 | 1          |
| hsa-miR-596    | NM_002483 | CEACAM6 | 1          |
| hsa-miR-604    | NM_002483 | CEACAM6 | 1          |
| hsa-miR-619-   | NM_002483 | CEACAM6 | 1          |
| hsa-miR-621    | NM_002483 | CEACAM6 | 1          |
| hsa-miR-630    | NM_002483 | CEACAM6 | 1          |
| hsa-miR-643    | NM_002483 | CEACAM6 | 1          |
| hsa-miR-644a   | NM_002483 | CEACAM6 | 1          |
| hsa-miR-647    | NM_002483 | CEACAM6 | 1          |
| hsa-miR-652-   | NM_002483 | CEACAM6 | 1          |
| hsa-miR-659-   | NM_002483 | CEACAM6 | 1          |
| hsa-miR-671-   | NM_002483 | CEACAM6 | 1          |
| hsa-miR-671-   | NM_002483 | CEACAM6 | 1          |
| hsa-miR-668-   | NM_002483 | CEACAM6 | 1          |
| hsa-miR-1296   | NM_002483 | CEACAM6 | 1          |
| hsa-miR-1271   | NM_002483 | CEACAM6 | 1          |
| hsa-miR-1301   | NM_002483 | CEACAM6 | 1          |
| hsa-miR-1185   | NM_002483 | CEACAM6 | 1          |
| hsa-miR-766-   | NM_002483 | CEACAM6 | 1          |
| hsa-miR-378d   | NM_002483 | CEACAM6 | 1          |
| hsa-miR-765    | NM_002483 | CEACAM6 | 1          |
| hsa-miR-874-   | NM_002483 | CEACAM6 | 1          |
| hsa-miR-888-   | NM_002483 | CEACAM6 | 1          |
| hsa-miR-892b   | NM_002483 | CEACAM6 | 1          |
| hsa-miR-889-   | NM_002483 | CEACAM6 | 1          |
| hsa-miR-889-   | NM_002483 | CEACAM6 | 1          |
| hsa-miR-887-   | NM_002483 | CEACAM6 | 1          |
| hsa-miR-873-   | NM_002483 | CEACAM6 | 1          |
| hsa-miR-924    | NM_002483 | CEACAM6 | 1          |
| hsa-miR-1229   | NM_002483 | CEACAM6 | 1          |
| hsa-miR-1206   | NM_002483 | CEACAM6 | 1          |
| hsa-miR-1246   | NM_002483 | CEACAM6 | 1          |
| hsa-miR-1249   | NM_002483 | CEACAM6 | 1          |
| hsa-miR-1256   | NM_002483 | CEACAM6 | 1          |
| hsa-miR-127c   | NM_002483 | CEACAM6 | 1          |
| hsa-miR-1292   | NM_002483 | CEACAM6 | 1          |
| hsa-miR-664a   | NM_002483 | CEACAM6 | 1          |
| hsa-miR-1322   | NM_002483 | CEACAM6 | 1          |
| hsa-miR-1471   | NM_002483 | CEACAM6 | 1          |
| hsa-miR-1909   | NM_002483 | CEACAM6 | 1          |
| hsa-miR-191c   | NM_002483 | CEACAM6 | 1          |
| hsa-miR-1911   | NM_002483 | CEACAM6 | 1          |
| hsa-miR-1915   | NM_002483 | CEACAM6 | 1          |
| hsa-miR-2276   | NM_002483 | CEACAM6 | 1          |
| hsa-miR-2277   | NM_002483 | CEACAM6 | 1          |
| hsa-miR-2277   | NM_002483 | CEACAM6 | 1          |
| hsa-miR-2681   | NM_002483 | CEACAM6 | 1          |
| hsa-miR-312c   | NM_002483 | CEACAM6 | 1          |
| hsa-miR-3121   | NM_002483 | CEACAM6 | 1          |

|              |           |         |   |
|--------------|-----------|---------|---|
| hsa-miR-544t | NM_002483 | CEACAM6 | 1 |
| hsa-miR-3138 | NM_002483 | CEACAM6 | 1 |
| hsa-miR-3141 | NM_002483 | CEACAM6 | 1 |
| hsa-miR-548v | NM_002483 | CEACAM6 | 1 |
| hsa-miR-3162 | NM_002483 | CEACAM6 | 1 |
| hsa-miR-3166 | NM_002483 | CEACAM6 | 1 |
| hsa-miR-3173 | NM_002483 | CEACAM6 | 1 |
| hsa-miR-3177 | NM_002483 | CEACAM6 | 1 |
| hsa-miR-3185 | NM_002483 | CEACAM6 | 1 |
| hsa-miR-3196 | NM_002483 | CEACAM6 | 1 |
| hsa-miR-4304 | NM_002483 | CEACAM6 | 1 |
| hsa-miR-4309 | NM_002483 | CEACAM6 | 1 |
| hsa-miR-4317 | NM_002483 | CEACAM6 | 1 |
| hsa-miR-4259 | NM_002483 | CEACAM6 | 1 |
| hsa-miR-4269 | NM_002483 | CEACAM6 | 1 |
| hsa-miR-4271 | NM_002483 | CEACAM6 | 1 |
| hsa-miR-4280 | NM_002483 | CEACAM6 | 1 |
| hsa-miR-500t | NM_002483 | CEACAM6 | 1 |
| hsa-miR-3609 | NM_002483 | CEACAM6 | 1 |
| hsa-miR-3616 | NM_002483 | CEACAM6 | 1 |
| hsa-miR-3622 | NM_002483 | CEACAM6 | 1 |
| hsa-miR-3663 | NM_002483 | CEACAM6 | 1 |
| hsa-miR-3665 | NM_002483 | CEACAM6 | 1 |
| hsa-miR-3675 | NM_002483 | CEACAM6 | 1 |
| hsa-miR-3675 | NM_002483 | CEACAM6 | 1 |
| hsa-miR-3678 | NM_002483 | CEACAM6 | 1 |
| hsa-miR-3681 | NM_002483 | CEACAM6 | 1 |
| hsa-miR-3689 | NM_002483 | CEACAM6 | 1 |
| hsa-miR-3921 | NM_002483 | CEACAM6 | 1 |
| hsa-miR-3926 | NM_002483 | CEACAM6 | 1 |
| hsa-miR-3926 | NM_002483 | CEACAM6 | 1 |
| hsa-miR-3929 | NM_002483 | CEACAM6 | 1 |
| hsa-miR-3934 | NM_002483 | CEACAM6 | 1 |
| hsa-miR-550t | NM_002483 | CEACAM6 | 1 |
| hsa-miR-378g | NM_002483 | CEACAM6 | 1 |
| hsa-miR-4429 | NM_002483 | CEACAM6 | 1 |
| hsa-miR-4436 | NM_002483 | CEACAM6 | 1 |
| hsa-miR-4444 | NM_002483 | CEACAM6 | 1 |
| hsa-miR-4472 | NM_002483 | CEACAM6 | 1 |
| hsa-miR-4474 | NM_002483 | CEACAM6 | 1 |
| hsa-miR-4476 | NM_002483 | CEACAM6 | 1 |
| hsa-miR-3689 | NM_002483 | CEACAM6 | 1 |
| hsa-miR-4482 | NM_002483 | CEACAM6 | 1 |
| hsa-miR-4487 | NM_002483 | CEACAM6 | 1 |
| hsa-miR-4492 | NM_002483 | CEACAM6 | 1 |
| hsa-miR-4498 | NM_002483 | CEACAM6 | 1 |
| hsa-miR-4499 | NM_002483 | CEACAM6 | 1 |
| hsa-miR-4524 | NM_002483 | CEACAM6 | 1 |
| hsa-miR-1587 | NM_002483 | CEACAM6 | 1 |
| hsa-miR-4538 | NM_002483 | CEACAM6 | 1 |
| hsa-miR-3976 | NM_002483 | CEACAM6 | 1 |
| hsa-miR-4638 | NM_002483 | CEACAM6 | 1 |
| hsa-miR-4640 | NM_002483 | CEACAM6 | 1 |
| hsa-miR-4646 | NM_002483 | CEACAM6 | 1 |
| hsa-miR-4661 | NM_002483 | CEACAM6 | 1 |
| hsa-miR-4667 | NM_002483 | CEACAM6 | 1 |
| hsa-miR-4667 | NM_002483 | CEACAM6 | 1 |
| hsa-miR-4669 | NM_002483 | CEACAM6 | 1 |
| hsa-miR-4674 | NM_002483 | CEACAM6 | 1 |
| hsa-miR-4674 | NM_002483 | CEACAM6 | 1 |
| hsa-miR-4685 | NM_002483 | CEACAM6 | 1 |
| hsa-miR-4686 | NM_002483 | CEACAM6 | 1 |
| hsa-miR-4687 | NM_002483 | CEACAM6 | 1 |
| hsa-miR-4687 | NM_002483 | CEACAM6 | 1 |
| hsa-miR-4688 | NM_002483 | CEACAM6 | 1 |
| hsa-miR-4695 | NM_002483 | CEACAM6 | 1 |
| hsa-miR-4701 | NM_002483 | CEACAM6 | 1 |
| hsa-miR-4703 | NM_002483 | CEACAM6 | 1 |
| hsa-miR-4709 | NM_002483 | CEACAM6 | 1 |
| hsa-miR-4710 | NM_002483 | CEACAM6 | 1 |
| hsa-miR-4715 | NM_002483 | CEACAM6 | 1 |
| hsa-miR-4716 | NM_002483 | CEACAM6 | 1 |
| hsa-miR-3529 | NM_002483 | CEACAM6 | 1 |
| hsa-miR-4726 | NM_002483 | CEACAM6 | 1 |
| hsa-miR-4727 | NM_002483 | CEACAM6 | 1 |
| hsa-miR-4727 | NM_002483 | CEACAM6 | 1 |
| hsa-miR-4733 | NM_002483 | CEACAM6 | 1 |
| hsa-miR-4739 | NM_002483 | CEACAM6 | 1 |
| hsa-miR-4742 | NM_002483 | CEACAM6 | 1 |
| hsa-miR-4764 | NM_002483 | CEACAM6 | 1 |
| hsa-miR-4778 | NM_002483 | CEACAM6 | 1 |
| hsa-miR-4779 | NM_002483 | CEACAM6 | 1 |
| hsa-miR-4786 | NM_002483 | CEACAM6 | 1 |
| hsa-miR-4788 | NM_002483 | CEACAM6 | 1 |
| hsa-miR-4789 | NM_002483 | CEACAM6 | 1 |
| hsa-miR-5001 | NM_002483 | CEACAM6 | 1 |
| hsa-miR-5001 | NM_002483 | CEACAM6 | 1 |
| hsa-miR-5002 | NM_002483 | CEACAM6 | 1 |
| hsa-miR-5006 | NM_002483 | CEACAM6 | 1 |
| hsa-miR-5011 | NM_002483 | CEACAM6 | 1 |
| hsa-miR-5089 | NM_002483 | CEACAM6 | 1 |
| hsa-miR-5187 | NM_002483 | CEACAM6 | 1 |
| hsa-miR-5587 | NM_002483 | CEACAM6 | 1 |
| hsa-miR-5687 | NM_002483 | CEACAM6 | 1 |

|                        |         |            |
|------------------------|---------|------------|
| hsa-miR-5689 NM_002483 | CEACAM6 | 1          |
| hsa-miR-5735 NM_002483 | CEACAM6 | 1          |
| hsa-miR-6077 NM_002483 | CEACAM6 | 1          |
| hsa-miR-6081 NM_002483 | CEACAM6 | 1          |
| hsa-miR-6085 NM_002483 | CEACAM6 | 1          |
| hsa-miR-6086 NM_002483 | CEACAM6 | 1          |
| hsa-miR-6124 NM_002483 | CEACAM6 | 1          |
| hsa-miR-6125 NM_002483 | CEACAM6 | 1          |
| hsa-miR-6504 NM_002483 | CEACAM6 | 1          |
| hsa-miR-6506 NM_002483 | CEACAM6 | 1          |
| hsa-miR-6506 NM_002483 | CEACAM6 | 1          |
| hsa-miR-6720 NM_002483 | CEACAM6 | 1          |
| hsa-miR-6720 NM_002483 | CEACAM6 | 1          |
| hsa-miR-6722 NM_002483 | CEACAM6 | 1          |
| hsa-miR-6735 NM_002483 | CEACAM6 | 1          |
| hsa-miR-6735 NM_002483 | CEACAM6 | 1          |
| hsa-miR-6738 NM_002483 | CEACAM6 | 1          |
| hsa-miR-6742 NM_002483 | CEACAM6 | 1          |
| hsa-miR-6746 NM_002483 | CEACAM6 | 1          |
| hsa-miR-6751 NM_002483 | CEACAM6 | 1          |
| hsa-miR-6752 NM_002483 | CEACAM6 | 1          |
| hsa-miR-6753 NM_002483 | CEACAM6 | 1          |
| hsa-miR-6754 NM_002483 | CEACAM6 | 1          |
| hsa-miR-6757 NM_002483 | CEACAM6 | 1          |
| hsa-miR-6764 NM_002483 | CEACAM6 | 1          |
| hsa-miR-6766 NM_002483 | CEACAM6 | 1          |
| hsa-miR-6769 NM_002483 | CEACAM6 | 1          |
| hsa-miR-6770 NM_002483 | CEACAM6 | 1          |
| hsa-miR-6773 NM_002483 | CEACAM6 | 1          |
| hsa-miR-6779 NM_002483 | CEACAM6 | 1          |
| hsa-miR-6783 NM_002483 | CEACAM6 | 1          |
| hsa-miR-6786 NM_002483 | CEACAM6 | 1          |
| hsa-miR-6787 NM_002483 | CEACAM6 | 1          |
| hsa-miR-6796 NM_002483 | CEACAM6 | 1          |
| hsa-miR-6796 NM_002483 | CEACAM6 | 1          |
| hsa-miR-6797 NM_002483 | CEACAM6 | 1          |
| hsa-miR-6800 NM_002483 | CEACAM6 | 1          |
| hsa-miR-6807 NM_002483 | CEACAM6 | 1          |
| hsa-miR-6816 NM_002483 | CEACAM6 | 1          |
| hsa-miR-6780 NM_002483 | CEACAM6 | 1          |
| hsa-miR-6842 NM_002483 | CEACAM6 | 1          |
| hsa-miR-6842 NM_002483 | CEACAM6 | 1          |
| hsa-miR-6845 NM_002483 | CEACAM6 | 1          |
| hsa-miR-6846 NM_002483 | CEACAM6 | 1          |
| hsa-miR-6847 NM_002483 | CEACAM6 | 1          |
| hsa-miR-6852 NM_002483 | CEACAM6 | 1          |
| hsa-miR-6855 NM_002483 | CEACAM6 | 1          |
| hsa-miR-6858 NM_002483 | CEACAM6 | 1          |
| hsa-miR-6864 NM_002483 | CEACAM6 | 1          |
| hsa-miR-6865 NM_002483 | CEACAM6 | 1          |
| hsa-miR-6871 NM_002483 | CEACAM6 | 1          |
| hsa-miR-6873 NM_002483 | CEACAM6 | 1          |
| hsa-miR-6874 NM_002483 | CEACAM6 | 1          |
| hsa-miR-6880 NM_002483 | CEACAM6 | 1          |
| hsa-miR-6881 NM_002483 | CEACAM6 | 1          |
| hsa-miR-6882 NM_002483 | CEACAM6 | 1          |
| hsa-miR-6885 NM_002483 | CEACAM6 | 1          |
| hsa-miR-6893 NM_002483 | CEACAM6 | 1          |
| hsa-miR-6895 NM_002483 | CEACAM6 | 1          |
| hsa-miR-6895 NM_002483 | CEACAM6 | 1          |
| hsa-miR-7150 NM_002483 | CEACAM6 | 1          |
| hsa-miR-7151 NM_002483 | CEACAM6 | 1          |
| hsa-miR-7155 NM_002483 | CEACAM6 | 1          |
| hsa-miR-7158 NM_002483 | CEACAM6 | 1          |
| hsa-miR-7702 NM_002483 | CEACAM6 | 1          |
| hsa-miR-7705 NM_002483 | CEACAM6 | 1          |
| hsa-miR-7848 NM_002483 | CEACAM6 | 1          |
| hsa-miR-7850 NM_002483 | CEACAM6 | 1          |
| hsa-miR-7974 NM_002483 | CEACAM6 | 1          |
| hsa-miR-8055 NM_002483 | CEACAM6 | 1          |
| hsa-miR-8071 NM_002483 | CEACAM6 | 1          |
| hsa-miR-8085 NM_002483 | CEACAM6 | 1          |
| hsa-miR-8088 NM_002483 | CEACAM6 | 1          |
| hsa-miR-9718 NM_002483 | CEACAM6 | 1          |
| hsa-miR-9900 NM_002483 | CEACAM6 | 1          |
| hsa-miR-9903 NM_002483 | CEACAM6 | 1          |
| hsa-miR-9903 NM_002483 | CEACAM6 | 1          |
| hsa-miR-1118 NM_002483 | CEACAM6 | 1          |
| hsa-miR-1140 NM_002483 | CEACAM6 | 1          |
| hsa-miR-3059 NM_002483 | CEACAM6 | 1          |
| hsa-miR-6525 NM_002483 | CEACAM6 | 1          |
| hsa-miR-6758 NM_002644 | PIGR    | 0.95604396 |
| hsa-miR-1283 NM_002644 | PIGR    | 0.96153846 |
| hsa-miR-711 NM_002644  | PIGR    | 0.96153846 |
| hsa-miR-4651 NM_002644 | PIGR    | 0.96153846 |
| hsa-miR-4720 NM_002644 | PIGR    | 0.96153846 |
| hsa-miR-4802 NM_002644 | PIGR    | 0.96153846 |
| hsa-miR-5585 NM_002644 | PIGR    | 0.96153846 |
| hsa-miR-8052 NM_002644 | PIGR    | 0.96153846 |
| hsa-miR-8075 NM_002644 | PIGR    | 0.96153846 |
| hsa-miR-1040 NM_002644 | PIGR    | 0.96153846 |
| hsa-miR-1212 NM_002644 | PIGR    | 0.96153846 |

|               |           |      |            |
|---------------|-----------|------|------------|
| hsa-let-7a-5p | NM_002644 | PIGR | 0.96923077 |
| hsa-miR-4701  | NM_002644 | PIGR | 0.96923077 |
| hsa-miR-4743  | NM_002644 | PIGR | 0.97435897 |
| hsa-miR-664t  | NM_002644 | PIGR | 0.97435897 |
| hsa-miR-7108  | NM_002644 | PIGR | 0.97435897 |
| hsa-miR-211-  | NM_002644 | PIGR | 0.97435897 |
| hsa-miR-6804  | NM_002644 | PIGR | 0.97802198 |
| hsa-miR-381-  | NM_002644 | PIGR | 0.98076923 |
| hsa-miR-202-  | NM_002644 | PIGR | 0.98076923 |
| hsa-miR-1285  | NM_002644 | PIGR | 0.98076923 |
| hsa-miR-4286  | NM_002644 | PIGR | 0.98076923 |
| hsa-miR-6077  | NM_002644 | PIGR | 0.98076923 |
| hsa-miR-4313  | NM_002644 | PIGR | 0.98461539 |
| hsa-miR-6761  | NM_002644 | PIGR | 0.99145299 |
| hsa-let-7a-5p | NM_002644 | PIGR | 1          |
| hsa-let-7c-5p | NM_002644 | PIGR | 1          |
| hsa-let-7d-5p | NM_002644 | PIGR | 1          |
| hsa-let-7d-5p | NM_002644 | PIGR | 1          |
| hsa-let-7e-5p | NM_002644 | PIGR | 1          |
| hsa-let-7e-5p | NM_002644 | PIGR | 1          |
| hsa-let-7f-5p | NM_002644 | PIGR | 1          |
| hsa-miR-23a-  | NM_002644 | PIGR | 1          |
| hsa-miR-23a-  | NM_002644 | PIGR | 1          |
| hsa-miR-31-5j | NM_002644 | PIGR | 1          |
| hsa-miR-92a-  | NM_002644 | PIGR | 1          |
| hsa-miR-92a-  | NM_002644 | PIGR | 1          |
| hsa-miR-208a  | NM_002644 | PIGR | 1          |
| hsa-miR-129-  | NM_002644 | PIGR | 1          |
| hsa-miR-129-  | NM_002644 | PIGR | 1          |
| hsa-miR-139-  | NM_002644 | PIGR | 1          |
| hsa-miR-204-  | NM_002644 | PIGR | 1          |
| hsa-miR-212-  | NM_002644 | PIGR | 1          |
| hsa-miR-218-  | NM_002644 | PIGR | 1          |
| hsa-miR-30b-  | NM_002644 | PIGR | 1          |
| hsa-miR-30b-  | NM_002644 | PIGR | 1          |
| hsa-miR-124-  | NM_002644 | PIGR | 1          |
| hsa-miR-143-  | NM_002644 | PIGR | 1          |
| hsa-miR-143-  | NM_002644 | PIGR | 1          |
| hsa-miR-191-  | NM_002644 | PIGR | 1          |
| hsa-miR-125a  | NM_002644 | PIGR | 1          |
| hsa-miR-129-  | NM_002644 | PIGR | 1          |
| hsa-miR-150-  | NM_002644 | PIGR | 1          |
| hsa-miR-200a  | NM_002644 | PIGR | 1          |
| hsa-miR-299-  | NM_002644 | PIGR | 1          |
| hsa-miR-99b-  | NM_002644 | PIGR | 1          |
| hsa-miR-361-  | NM_002644 | PIGR | 1          |
| hsa-miR-365a  | NM_002644 | PIGR | 1          |
| hsa-miR-377-  | NM_002644 | PIGR | 1          |
| hsa-miR-331-  | NM_002644 | PIGR | 1          |
| hsa-miR-345-  | NM_002644 | PIGR | 1          |
| hsa-miR-423-  | NM_002644 | PIGR | 1          |
| hsa-miR-329-  | NM_002644 | PIGR | 1          |
| hsa-miR-497-  | NM_002644 | PIGR | 1          |
| hsa-miR-512-  | NM_002644 | PIGR | 1          |
| hsa-miR-520f  | NM_002644 | PIGR | 1          |
| hsa-miR-526t  | NM_002644 | PIGR | 1          |
| hsa-miR-525-  | NM_002644 | PIGR | 1          |
| hsa-miR-523-  | NM_002644 | PIGR | 1          |
| hsa-miR-520t  | NM_002644 | PIGR | 1          |
| hsa-miR-520c  | NM_002644 | PIGR | 1          |
| hsa-miR-520d  | NM_002644 | PIGR | 1          |
| hsa-miR-500a  | NM_002644 | PIGR | 1          |
| hsa-miR-504-  | NM_002644 | PIGR | 1          |
| hsa-miR-504-  | NM_002644 | PIGR | 1          |
| hsa-miR-504-  | NM_002644 | PIGR | 1          |
| hsa-miR-510-  | NM_002644 | PIGR | 1          |
| hsa-miR-510-  | NM_002644 | PIGR | 1          |
| hsa-miR-551a  | NM_002644 | PIGR | 1          |
| hsa-miR-553   | NM_002644 | PIGR | 1          |
| hsa-miR-564   | NM_002644 | PIGR | 1          |
| hsa-miR-578   | NM_002644 | PIGR | 1          |
| hsa-miR-585-  | NM_002644 | PIGR | 1          |
| hsa-miR-608   | NM_002644 | PIGR | 1          |
| hsa-miR-615-  | NM_002644 | PIGR | 1          |
| hsa-miR-616-  | NM_002644 | PIGR | 1          |
| hsa-miR-616-  | NM_002644 | PIGR | 1          |
| hsa-miR-629-  | NM_002644 | PIGR | 1          |
| hsa-miR-631   | NM_002644 | PIGR | 1          |
| hsa-miR-646   | NM_002644 | PIGR | 1          |
| hsa-miR-649   | NM_002644 | PIGR | 1          |
| hsa-miR-652-  | NM_002644 | PIGR | 1          |
| hsa-miR-654-  | NM_002644 | PIGR | 1          |
| hsa-miR-656-  | NM_002644 | PIGR | 1          |
| hsa-miR-658   | NM_002644 | PIGR | 1          |
| hsa-miR-659-  | NM_002644 | PIGR | 1          |
| hsa-miR-550a  | NM_002644 | PIGR | 1          |
| hsa-miR-1224  | NM_002644 | PIGR | 1          |
| hsa-miR-1271  | NM_002644 | PIGR | 1          |
| hsa-miR-1271  | NM_002644 | PIGR | 1          |
| hsa-miR-449c  | NM_002644 | PIGR | 1          |
| hsa-miR-1185  | NM_002644 | PIGR | 1          |
| hsa-miR-670-  | NM_002644 | PIGR | 1          |
| hsa-miR-761   | NM_002644 | PIGR | 1          |
| hsa-miR-675-  | NM_002644 | PIGR | 1          |



|              |           |      |   |
|--------------|-----------|------|---|
| hsa-miR-891a | NM_002644 | PIGR | 1 |
| hsa-miR-874- | NM_002644 | PIGR | 1 |
| hsa-miR-876- | NM_002644 | PIGR | 1 |
| hsa-miR-876- | NM_002644 | PIGR | 1 |
| hsa-miR-920  | NM_002644 | PIGR | 1 |
| hsa-miR-933  | NM_002644 | PIGR | 1 |
| hsa-miR-942- | NM_002644 | PIGR | 1 |
| hsa-miR-1179 | NM_002644 | PIGR | 1 |
| hsa-miR-1182 | NM_002644 | PIGR | 1 |
| hsa-miR-1183 | NM_002644 | PIGR | 1 |
| hsa-miR-1226 | NM_002644 | PIGR | 1 |
| hsa-miR-1226 | NM_002644 | PIGR | 1 |
| hsa-miR-1227 | NM_002644 | PIGR | 1 |
| hsa-miR-1227 | NM_002644 | PIGR | 1 |
| hsa-miR-1228 | NM_002644 | PIGR | 1 |
| hsa-miR-1231 | NM_002644 | PIGR | 1 |
| hsa-miR-1236 | NM_002644 | PIGR | 1 |
| hsa-miR-1237 | NM_002644 | PIGR | 1 |
| hsa-miR-1238 | NM_002644 | PIGR | 1 |
| hsa-miR-663b | NM_002644 | PIGR | 1 |
| hsa-miR-1287 | NM_002644 | PIGR | 1 |
| hsa-miR-1293 | NM_002644 | PIGR | 1 |
| hsa-miR-1295 | NM_002644 | PIGR | 1 |
| hsa-miR-1302 | NM_002644 | PIGR | 1 |
| hsa-miR-1304 | NM_002644 | PIGR | 1 |
| hsa-miR-1304 | NM_002644 | PIGR | 1 |
| hsa-miR-126c | NM_002644 | PIGR | 1 |
| hsa-miR-1268 | NM_002644 | PIGR | 1 |
| hsa-miR-1268 | NM_002644 | PIGR | 1 |
| hsa-miR-548h | NM_002644 | PIGR | 1 |
| hsa-miR-2114 | NM_002644 | PIGR | 1 |
| hsa-miR-2116 | NM_002644 | PIGR | 1 |
| hsa-miR-2276 | NM_002644 | PIGR | 1 |
| hsa-miR-2278 | NM_002644 | PIGR | 1 |
| hsa-miR-2278 | NM_002644 | PIGR | 1 |
| hsa-miR-3125 | NM_002644 | PIGR | 1 |
| hsa-miR-3126 | NM_002644 | PIGR | 1 |
| hsa-miR-3126 | NM_002644 | PIGR | 1 |
| hsa-miR-3127 | NM_002644 | PIGR | 1 |
| hsa-miR-3137 | NM_002644 | PIGR | 1 |
| hsa-miR-314c | NM_002644 | PIGR | 1 |
| hsa-miR-3141 | NM_002644 | PIGR | 1 |
| hsa-miR-3141 | NM_002644 | PIGR | 1 |
| hsa-miR-3143 | NM_002644 | PIGR | 1 |
| hsa-miR-1273 | NM_002644 | PIGR | 1 |
| hsa-miR-1273 | NM_002644 | PIGR | 1 |
| hsa-miR-3154 | NM_002644 | PIGR | 1 |
| hsa-miR-3154 | NM_002644 | PIGR | 1 |
| hsa-miR-3157 | NM_002644 | PIGR | 1 |
| hsa-miR-316c | NM_002644 | PIGR | 1 |
| hsa-miR-317c | NM_002644 | PIGR | 1 |
| hsa-miR-3174 | NM_002644 | PIGR | 1 |
| hsa-miR-3177 | NM_002644 | PIGR | 1 |
| hsa-miR-3184 | NM_002644 | PIGR | 1 |
| hsa-miR-3184 | NM_002644 | PIGR | 1 |
| hsa-miR-319c | NM_002644 | PIGR | 1 |
| hsa-miR-3191 | NM_002644 | PIGR | 1 |
| hsa-miR-3191 | NM_002644 | PIGR | 1 |
| hsa-miR-3192 | NM_002644 | PIGR | 1 |
| hsa-miR-3192 | NM_002644 | PIGR | 1 |
| hsa-miR-3193 | NM_002644 | PIGR | 1 |
| hsa-miR-3196 | NM_002644 | PIGR | 1 |
| hsa-miR-3202 | NM_002644 | PIGR | 1 |
| hsa-miR-4296 | NM_002644 | PIGR | 1 |
| hsa-miR-4298 | NM_002644 | PIGR | 1 |
| hsa-miR-4308 | NM_002644 | PIGR | 1 |
| hsa-miR-427c | NM_002644 | PIGR | 1 |
| hsa-miR-4274 | NM_002644 | PIGR | 1 |
| hsa-miR-4279 | NM_002644 | PIGR | 1 |
| hsa-miR-4283 | NM_002644 | PIGR | 1 |
| hsa-miR-4283 | NM_002644 | PIGR | 1 |
| hsa-miR-4284 | NM_002644 | PIGR | 1 |
| hsa-miR-429c | NM_002644 | PIGR | 1 |
| hsa-miR-4328 | NM_002644 | PIGR | 1 |
| hsa-miR-3619 | NM_002644 | PIGR | 1 |
| hsa-miR-3652 | NM_002644 | PIGR | 1 |
| hsa-miR-3652 | NM_002644 | PIGR | 1 |
| hsa-miR-366c | NM_002644 | PIGR | 1 |
| hsa-miR-3661 | NM_002644 | PIGR | 1 |
| hsa-miR-3665 | NM_002644 | PIGR | 1 |
| hsa-miR-3667 | NM_002644 | PIGR | 1 |
| hsa-miR-3675 | NM_002644 | PIGR | 1 |
| hsa-miR-368c | NM_002644 | PIGR | 1 |
| hsa-miR-3689 | NM_002644 | PIGR | 1 |
| hsa-miR-3689 | NM_002644 | PIGR | 1 |
| hsa-miR-3929 | NM_002644 | PIGR | 1 |
| hsa-miR-3936 | NM_002644 | PIGR | 1 |
| hsa-miR-4418 | NM_002644 | PIGR | 1 |
| hsa-miR-4433 | NM_002644 | PIGR | 1 |
| hsa-miR-4433 | NM_002644 | PIGR | 1 |
| hsa-miR-4436 | NM_002644 | PIGR | 1 |
| hsa-miR-444c | NM_002644 | PIGR | 1 |
| hsa-miR-4447 | NM_002644 | PIGR | 1 |
| hsa-miR-4456 | NM_002644 | PIGR | 1 |

|                        |      |   |
|------------------------|------|---|
| hsa-miR-3135 NM_002644 | PIGR | 1 |
| hsa-miR-4472 NM_002644 | PIGR | 1 |
| hsa-miR-4474 NM_002644 | PIGR | 1 |
| hsa-miR-4476 NM_002644 | PIGR | 1 |
| hsa-miR-4478 NM_002644 | PIGR | 1 |
| hsa-miR-3689 NM_002644 | PIGR | 1 |
| hsa-miR-4481 NM_002644 | PIGR | 1 |
| hsa-miR-4484 NM_002644 | PIGR | 1 |
| hsa-miR-4486 NM_002644 | PIGR | 1 |
| hsa-miR-4488 NM_002644 | PIGR | 1 |
| hsa-miR-4505 NM_002644 | PIGR | 1 |
| hsa-miR-4506 NM_002644 | PIGR | 1 |
| hsa-miR-2392 NM_002644 | PIGR | 1 |
| hsa-miR-2392 NM_002644 | PIGR | 1 |
| hsa-miR-4508 NM_002644 | PIGR | 1 |
| hsa-miR-4518 NM_002644 | PIGR | 1 |
| hsa-miR-4525 NM_002644 | PIGR | 1 |
| hsa-miR-4534 NM_002644 | PIGR | 1 |
| hsa-miR-4639 NM_002644 | PIGR | 1 |
| hsa-miR-4645 NM_002644 | PIGR | 1 |
| hsa-miR-4646 NM_002644 | PIGR | 1 |
| hsa-miR-4652 NM_002644 | PIGR | 1 |
| hsa-miR-4656 NM_002644 | PIGR | 1 |
| hsa-miR-4660 NM_002644 | PIGR | 1 |
| hsa-miR-4667 NM_002644 | PIGR | 1 |
| hsa-miR-4667 NM_002644 | PIGR | 1 |
| hsa-miR-4676 NM_002644 | PIGR | 1 |
| hsa-miR-4685 NM_002644 | PIGR | 1 |
| hsa-miR-4686 NM_002644 | PIGR | 1 |
| hsa-miR-4692 NM_002644 | PIGR | 1 |
| hsa-miR-4697 NM_002644 | PIGR | 1 |
| hsa-miR-4700 NM_002644 | PIGR | 1 |
| hsa-miR-4701 NM_002644 | PIGR | 1 |
| hsa-miR-4701 NM_002644 | PIGR | 1 |
| hsa-miR-4704 NM_002644 | PIGR | 1 |
| hsa-miR-4707 NM_002644 | PIGR | 1 |
| hsa-miR-4708 NM_002644 | PIGR | 1 |
| hsa-miR-4713 NM_002644 | PIGR | 1 |
| hsa-miR-4714 NM_002644 | PIGR | 1 |
| hsa-miR-4718 NM_002644 | PIGR | 1 |
| hsa-miR-4721 NM_002644 | PIGR | 1 |
| hsa-miR-4723 NM_002644 | PIGR | 1 |
| hsa-miR-4725 NM_002644 | PIGR | 1 |
| hsa-miR-4727 NM_002644 | PIGR | 1 |
| hsa-miR-4727 NM_002644 | PIGR | 1 |
| hsa-miR-4727 NM_002644 | PIGR | 1 |
| hsa-miR-4732 NM_002644 | PIGR | 1 |
| hsa-miR-4740 NM_002644 | PIGR | 1 |
| hsa-miR-4743 NM_002644 | PIGR | 1 |
| hsa-miR-1226 NM_002644 | PIGR | 1 |
| hsa-miR-4745 NM_002644 | PIGR | 1 |
| hsa-miR-4746 NM_002644 | PIGR | 1 |
| hsa-miR-4748 NM_002644 | PIGR | 1 |
| hsa-miR-4749 NM_002644 | PIGR | 1 |
| hsa-miR-4750 NM_002644 | PIGR | 1 |
| hsa-miR-4753 NM_002644 | PIGR | 1 |
| hsa-miR-4754 NM_002644 | PIGR | 1 |
| hsa-miR-4755 NM_002644 | PIGR | 1 |
| hsa-miR-4756 NM_002644 | PIGR | 1 |
| hsa-miR-4758 NM_002644 | PIGR | 1 |
| hsa-miR-4761 NM_002644 | PIGR | 1 |
| hsa-miR-4769 NM_002644 | PIGR | 1 |
| hsa-miR-4769 NM_002644 | PIGR | 1 |
| hsa-miR-4436 NM_002644 | PIGR | 1 |
| hsa-miR-1245 NM_002644 | PIGR | 1 |
| hsa-miR-2467 NM_002644 | PIGR | 1 |
| hsa-miR-4797 NM_002644 | PIGR | 1 |
| hsa-miR-4804 NM_002644 | PIGR | 1 |
| hsa-miR-5001 NM_002644 | PIGR | 1 |
| hsa-miR-5006 NM_002644 | PIGR | 1 |
| hsa-miR-5007 NM_002644 | PIGR | 1 |
| hsa-miR-5187 NM_002644 | PIGR | 1 |
| hsa-miR-5196 NM_002644 | PIGR | 1 |
| hsa-miR-5572 NM_002644 | PIGR | 1 |
| hsa-miR-5584 NM_002644 | PIGR | 1 |
| hsa-miR-5586 NM_002644 | PIGR | 1 |
| hsa-miR-5588 NM_002644 | PIGR | 1 |
| hsa-miR-5588 NM_002644 | PIGR | 1 |
| hsa-miR-5684 NM_002644 | PIGR | 1 |
| hsa-miR-5687 NM_002644 | PIGR | 1 |
| hsa-miR-5689 NM_002644 | PIGR | 1 |
| hsa-miR-5699 NM_002644 | PIGR | 1 |
| hsa-miR-5705 NM_002644 | PIGR | 1 |
| hsa-miR-6076 NM_002644 | PIGR | 1 |
| hsa-miR-6083 NM_002644 | PIGR | 1 |
| hsa-miR-6088 NM_002644 | PIGR | 1 |
| hsa-miR-6125 NM_002644 | PIGR | 1 |
| hsa-miR-6127 NM_002644 | PIGR | 1 |
| hsa-miR-6127 NM_002644 | PIGR | 1 |
| hsa-miR-6129 NM_002644 | PIGR | 1 |
| hsa-miR-6132 NM_002644 | PIGR | 1 |
| hsa-miR-6133 NM_002644 | PIGR | 1 |
| hsa-miR-6134 NM_002644 | PIGR | 1 |
| hsa-miR-6507 NM_002644 | PIGR | 1 |



|                          |       |            |
|--------------------------|-------|------------|
| hsa-miR-7114 NM_002644   | PIGR  | 1          |
| hsa-miR-7152 NM_002644   | PIGR  | 1          |
| hsa-miR-7162 NM_002644   | PIGR  | 1          |
| hsa-miR-7843 NM_002644   | PIGR  | 1          |
| hsa-miR-4433 NM_002644   | PIGR  | 1          |
| hsa-miR-4433 NM_002644   | PIGR  | 1          |
| hsa-miR-7846 NM_002644   | PIGR  | 1          |
| hsa-miR-7847 NM_002644   | PIGR  | 1          |
| hsa-miR-7851 NM_002644   | PIGR  | 1          |
| hsa-miR-7854 NM_002644   | PIGR  | 1          |
| hsa-miR-7855 NM_002644   | PIGR  | 1          |
| hsa-miR-8065 NM_002644   | PIGR  | 1          |
| hsa-miR-8080 NM_002644   | PIGR  | 1          |
| hsa-miR-8085 NM_002644   | PIGR  | 1          |
| hsa-miR-8085 NM_002644   | PIGR  | 1          |
| hsa-miR-8085 NM_002644   | PIGR  | 1          |
| hsa-miR-1035 NM_002644   | PIGR  | 1          |
| hsa-miR-1035 NM_002644   | PIGR  | 1          |
| hsa-miR-1035 NM_002644   | PIGR  | 1          |
| hsa-miR-1052 NM_002644   | PIGR  | 1          |
| hsa-miR-1052 NM_002644   | PIGR  | 1          |
| hsa-miR-1052 NM_002644   | PIGR  | 1          |
| hsa-miR-1118 NM_002644   | PIGR  | 1          |
| hsa-miR-9851 NM_002644   | PIGR  | 1          |
| hsa-miR-1211 NM_002644   | PIGR  | 1          |
| hsa-miR-1212 NM_002644   | PIGR  | 1          |
| hsa-miR-1212 NM_002644   | PIGR  | 1          |
| hsa-miR-30c-; NM_002661  | PLCG2 | 0.96153846 |
| hsa-miR-212-; NM_002661  | PLCG2 | 0.96153846 |
| hsa-miR-127-; NM_002661  | PLCG2 | 0.96153846 |
| hsa-miR-30c-; NM_002661  | PLCG2 | 0.96153846 |
| hsa-miR-629-; NM_002661  | PLCG2 | 0.96153846 |
| hsa-miR-1269; NM_002661  | PLCG2 | 0.96153846 |
| hsa-miR-4473; NM_002661  | PLCG2 | 0.96153846 |
| hsa-miR-4633; NM_002661  | PLCG2 | 0.96153846 |
| hsa-miR-7109; NM_002661  | PLCG2 | 0.96153846 |
| hsa-miR-8085; NM_002661  | PLCG2 | 0.96153846 |
| hsa-miR-222-; NM_002661  | PLCG2 | 0.97435897 |
| hsa-miR-520f; NM_002661  | PLCG2 | 0.97435897 |
| hsa-miR-644a; NM_002661  | PLCG2 | 0.97435897 |
| hsa-miR-147b; NM_002661  | PLCG2 | 0.97435897 |
| hsa-miR-877-; NM_002661  | PLCG2 | 0.97435897 |
| hsa-miR-3186; NM_002661  | PLCG2 | 0.97435897 |
| hsa-miR-4727; NM_002661  | PLCG2 | 0.97435897 |
| hsa-miR-4743; NM_002661  | PLCG2 | 0.97435897 |
| hsa-miR-6737; NM_002661  | PLCG2 | 0.97435897 |
| hsa-miR-7109; NM_002661  | PLCG2 | 0.97435897 |
| hsa-miR-4714; NM_002661  | PLCG2 | 0.97435897 |
| hsa-miR-6088; NM_002661  | PLCG2 | 0.97435897 |
| hsa-miR-682c; NM_002661  | PLCG2 | 0.97435897 |
| hsa-miR-1271; NM_002661  | PLCG2 | 0.98076923 |
| hsa-miR-1281; NM_002661  | PLCG2 | 0.98076923 |
| hsa-miR-3622; NM_002661  | PLCG2 | 0.98076923 |
| hsa-miR-2392; NM_002661  | PLCG2 | 0.98076923 |
| hsa-miR-6805; NM_002661  | PLCG2 | 0.98076923 |
| hsa-miR-6891; NM_002661  | PLCG2 | 0.98076923 |
| hsa-let-7e-5p; NM_002661 | PLCG2 | 1          |
| hsa-miR-25-3j; NM_002661 | PLCG2 | 1          |
| hsa-miR-99a-; NM_002661  | PLCG2 | 1          |
| hsa-miR-197-; NM_002661  | PLCG2 | 1          |
| hsa-miR-30c-; NM_002661  | PLCG2 | 1          |
| hsa-miR-215-; NM_002661  | PLCG2 | 1          |
| hsa-miR-216a; NM_002661  | PLCG2 | 1          |
| hsa-miR-217-; NM_002661  | PLCG2 | 1          |
| hsa-miR-222-; NM_002661  | PLCG2 | 1          |
| hsa-miR-224-; NM_002661  | PLCG2 | 1          |
| hsa-miR-135a; NM_002661  | PLCG2 | 1          |
| hsa-miR-137-; NM_002661  | PLCG2 | 1          |
| hsa-miR-143-; NM_002661  | PLCG2 | 1          |
| hsa-miR-152-; NM_002661  | PLCG2 | 1          |
| hsa-miR-129-; NM_002661  | PLCG2 | 1          |
| hsa-miR-134-; NM_002661  | PLCG2 | 1          |
| hsa-miR-154-; NM_002661  | PLCG2 | 1          |
| hsa-miR-185-; NM_002661  | PLCG2 | 1          |
| hsa-miR-200c; NM_002661  | PLCG2 | 1          |
| hsa-miR-128-; NM_002661  | PLCG2 | 1          |
| hsa-miR-99b-; NM_002661  | PLCG2 | 1          |
| hsa-miR-361-; NM_002661  | PLCG2 | 1          |
| hsa-miR-362-; NM_002661  | PLCG2 | 1          |
| hsa-miR-363-; NM_002661  | PLCG2 | 1          |
| hsa-miR-302d; NM_002661  | PLCG2 | 1          |
| hsa-miR-381-; NM_002661  | PLCG2 | 1          |
| hsa-miR-382-; NM_002661  | PLCG2 | 1          |
| hsa-miR-340-; NM_002661  | PLCG2 | 1          |
| hsa-miR-328-; NM_002661  | PLCG2 | 1          |
| hsa-miR-135t; NM_002661  | PLCG2 | 1          |
| hsa-miR-148t; NM_002661  | PLCG2 | 1          |
| hsa-miR-324-; NM_002661  | PLCG2 | 1          |
| hsa-miR-196t; NM_002661  | PLCG2 | 1          |
| hsa-miR-196t; NM_002661  | PLCG2 | 1          |
| hsa-miR-423-; NM_002661  | PLCG2 | 1          |

|                        |       |   |
|------------------------|-------|---|
| hsa-miR-202-NM_002661  | PLCG2 | 1 |
| hsa-miR-494-NM_002661  | PLCG2 | 1 |
| hsa-miR-497-NM_002661  | PLCG2 | 1 |
| hsa-miR-497-NM_002661  | PLCG2 | 1 |
| hsa-miR-520a-NM_002661 | PLCG2 | 1 |
| hsa-miR-526b-NM_002661 | PLCG2 | 1 |
| hsa-miR-525-NM_002661  | PLCG2 | 1 |
| hsa-miR-523-NM_002661  | PLCG2 | 1 |
| hsa-miR-450a-NM_002661 | PLCG2 | 1 |
| hsa-miR-455-NM_002661  | PLCG2 | 1 |
| hsa-miR-554-NM_002661  | PLCG2 | 1 |
| hsa-miR-92b-NM_002661  | PLCG2 | 1 |
| hsa-miR-92b-NM_002661  | PLCG2 | 1 |
| hsa-miR-585-NM_002661  | PLCG2 | 1 |
| hsa-miR-585-NM_002661  | PLCG2 | 1 |
| hsa-miR-585-NM_002661  | PLCG2 | 1 |
| hsa-miR-588-NM_002661  | PLCG2 | 1 |
| hsa-miR-550a-NM_002661 | PLCG2 | 1 |
| hsa-miR-605-NM_002661  | PLCG2 | 1 |
| hsa-miR-605-NM_002661  | PLCG2 | 1 |
| hsa-miR-609-NM_002661  | PLCG2 | 1 |
| hsa-miR-619-NM_002661  | PLCG2 | 1 |
| hsa-miR-632-NM_002661  | PLCG2 | 1 |
| hsa-miR-643-NM_002661  | PLCG2 | 1 |
| hsa-miR-648-NM_002661  | PLCG2 | 1 |
| hsa-miR-648-NM_002661  | PLCG2 | 1 |
| hsa-miR-654-NM_002661  | PLCG2 | 1 |
| hsa-miR-767-NM_002661  | PLCG2 | 1 |
| hsa-miR-767-NM_002661  | PLCG2 | 1 |
| hsa-miR-1224-NM_002661 | PLCG2 | 1 |
| hsa-miR-1271-NM_002661 | PLCG2 | 1 |
| hsa-miR-765-NM_002661  | PLCG2 | 1 |
| hsa-miR-770-NM_002661  | PLCG2 | 1 |
| hsa-miR-885-NM_002661  | PLCG2 | 1 |
| hsa-miR-760-NM_002661  | PLCG2 | 1 |
| hsa-miR-216b-NM_002661 | PLCG2 | 1 |
| hsa-miR-933-NM_002661  | PLCG2 | 1 |
| hsa-miR-938-NM_002661  | PLCG2 | 1 |
| hsa-miR-942-NM_002661  | PLCG2 | 1 |
| hsa-miR-1178-NM_002661 | PLCG2 | 1 |
| hsa-miR-1178-NM_002661 | PLCG2 | 1 |
| hsa-miR-1233-NM_002661 | PLCG2 | 1 |
| hsa-miR-1233-NM_002661 | PLCG2 | 1 |
| hsa-miR-1234-NM_002661 | PLCG2 | 1 |
| hsa-miR-1285-NM_002661 | PLCG2 | 1 |
| hsa-miR-1291-NM_002661 | PLCG2 | 1 |
| hsa-miR-1293-NM_002661 | PLCG2 | 1 |
| hsa-miR-1245-NM_002661 | PLCG2 | 1 |
| hsa-miR-1251-NM_002661 | PLCG2 | 1 |
| hsa-miR-1261-NM_002661 | PLCG2 | 1 |
| hsa-miR-1268-NM_002661 | PLCG2 | 1 |
| hsa-miR-1275-NM_002661 | PLCG2 | 1 |
| hsa-miR-1255-NM_002661 | PLCG2 | 1 |
| hsa-miR-1535-NM_002661 | PLCG2 | 1 |
| hsa-miR-191C-NM_002661 | PLCG2 | 1 |
| hsa-miR-191C-NM_002661 | PLCG2 | 1 |
| hsa-miR-1912-NM_002661 | PLCG2 | 1 |
| hsa-miR-1914-NM_002661 | PLCG2 | 1 |
| hsa-miR-2681-NM_002661 | PLCG2 | 1 |
| hsa-miR-3116-NM_002661 | PLCG2 | 1 |
| hsa-miR-3122-NM_002661 | PLCG2 | 1 |
| hsa-miR-3141-NM_002661 | PLCG2 | 1 |
| hsa-miR-3144-NM_002661 | PLCG2 | 1 |
| hsa-miR-3147-NM_002661 | PLCG2 | 1 |
| hsa-miR-3150-NM_002661 | PLCG2 | 1 |
| hsa-miR-3151-NM_002661 | PLCG2 | 1 |
| hsa-miR-3155-NM_002661 | PLCG2 | 1 |
| hsa-miR-3157-NM_002661 | PLCG2 | 1 |
| hsa-miR-3157-NM_002661 | PLCG2 | 1 |
| hsa-miR-3160-NM_002661 | PLCG2 | 1 |
| hsa-miR-3162-NM_002661 | PLCG2 | 1 |
| hsa-miR-3173-NM_002661 | PLCG2 | 1 |
| hsa-miR-3175-NM_002661 | PLCG2 | 1 |
| hsa-miR-3177-NM_002661 | PLCG2 | 1 |
| hsa-miR-3065-NM_002661 | PLCG2 | 1 |
| hsa-miR-3187-NM_002661 | PLCG2 | 1 |
| hsa-miR-3190-NM_002661 | PLCG2 | 1 |
| hsa-miR-3190-NM_002661 | PLCG2 | 1 |
| hsa-miR-3190-NM_002661 | PLCG2 | 1 |
| hsa-miR-3191-NM_002661 | PLCG2 | 1 |
| hsa-miR-3192-NM_002661 | PLCG2 | 1 |
| hsa-miR-3194-NM_002661 | PLCG2 | 1 |
| hsa-miR-4295-NM_002661 | PLCG2 | 1 |
| hsa-miR-4298-NM_002661 | PLCG2 | 1 |
| hsa-miR-4316-NM_002661 | PLCG2 | 1 |
| hsa-miR-4320-NM_002661 | PLCG2 | 1 |
| hsa-miR-4257-NM_002661 | PLCG2 | 1 |
| hsa-miR-4257-NM_002661 | PLCG2 | 1 |
| hsa-miR-4258-NM_002661 | PLCG2 | 1 |
| hsa-miR-4251-NM_002661 | PLCG2 | 1 |
| hsa-miR-4252-NM_002661 | PLCG2 | 1 |
| hsa-miR-4261-NM_002661 | PLCG2 | 1 |
| hsa-miR-4277-NM_002661 | PLCG2 | 1 |
| hsa-miR-4278-NM_002661 | PLCG2 | 1 |

|                        |       |   |
|------------------------|-------|---|
| hsa-miR-4287 NM_002661 | PLCG2 | 1 |
| hsa-miR-4328 NM_002661 | PLCG2 | 1 |
| hsa-miR-3605 NM_002661 | PLCG2 | 1 |
| hsa-miR-3605 NM_002661 | PLCG2 | 1 |
| hsa-miR-3619 NM_002661 | PLCG2 | 1 |
| hsa-miR-3622 NM_002661 | PLCG2 | 1 |
| hsa-miR-3652 NM_002661 | PLCG2 | 1 |
| hsa-miR-3667 NM_002661 | PLCG2 | 1 |
| hsa-miR-3675 NM_002661 | PLCG2 | 1 |
| hsa-miR-3675 NM_002661 | PLCG2 | 1 |
| hsa-miR-3679 NM_002661 | PLCG2 | 1 |
| hsa-miR-3685 NM_002661 | PLCG2 | 1 |
| hsa-miR-3689 NM_002661 | PLCG2 | 1 |
| hsa-miR-3714 NM_002661 | PLCG2 | 1 |
| hsa-miR-3911 NM_002661 | PLCG2 | 1 |
| hsa-miR-3917 NM_002661 | PLCG2 | 1 |
| hsa-miR-3934 NM_002661 | PLCG2 | 1 |
| hsa-miR-3944 NM_002661 | PLCG2 | 1 |
| hsa-miR-3945 NM_002661 | PLCG2 | 1 |
| hsa-miR-374c NM_002661 | PLCG2 | 1 |
| hsa-miR-4421 NM_002661 | PLCG2 | 1 |
| hsa-miR-4428 NM_002661 | PLCG2 | 1 |
| hsa-miR-4429 NM_002661 | PLCG2 | 1 |
| hsa-miR-4430 NM_002661 | PLCG2 | 1 |
| hsa-miR-4435 NM_002661 | PLCG2 | 1 |
| hsa-miR-4463 NM_002661 | PLCG2 | 1 |
| hsa-miR-4474 NM_002661 | PLCG2 | 1 |
| hsa-miR-4474 NM_002661 | PLCG2 | 1 |
| hsa-miR-4478 NM_002661 | PLCG2 | 1 |
| hsa-miR-4479 NM_002661 | PLCG2 | 1 |
| hsa-miR-3155 NM_002661 | PLCG2 | 1 |
| hsa-miR-4483 NM_002661 | PLCG2 | 1 |
| hsa-miR-4489 NM_002661 | PLCG2 | 1 |
| hsa-miR-4494 NM_002661 | PLCG2 | 1 |
| hsa-miR-4538 NM_002661 | PLCG2 | 1 |
| hsa-miR-4660 NM_002661 | PLCG2 | 1 |
| hsa-miR-4692 NM_002661 | PLCG2 | 1 |
| hsa-miR-4697 NM_002661 | PLCG2 | 1 |
| hsa-miR-4701 NM_002661 | PLCG2 | 1 |
| hsa-miR-4704 NM_002661 | PLCG2 | 1 |
| hsa-miR-203b NM_002661 | PLCG2 | 1 |
| hsa-miR-4711 NM_002661 | PLCG2 | 1 |
| hsa-miR-4711 NM_002661 | PLCG2 | 1 |
| hsa-miR-4716 NM_002661 | PLCG2 | 1 |
| hsa-miR-4716 NM_002661 | PLCG2 | 1 |
| hsa-miR-4725 NM_002661 | PLCG2 | 1 |
| hsa-miR-4725 NM_002661 | PLCG2 | 1 |
| hsa-miR-4728 NM_002661 | PLCG2 | 1 |
| hsa-miR-4731 NM_002661 | PLCG2 | 1 |
| hsa-miR-4732 NM_002661 | PLCG2 | 1 |
| hsa-miR-4733 NM_002661 | PLCG2 | 1 |
| hsa-miR-4746 NM_002661 | PLCG2 | 1 |
| hsa-miR-4747 NM_002661 | PLCG2 | 1 |
| hsa-miR-4749 NM_002661 | PLCG2 | 1 |
| hsa-miR-4749 NM_002661 | PLCG2 | 1 |
| hsa-miR-4750 NM_002661 | PLCG2 | 1 |
| hsa-miR-4750 NM_002661 | PLCG2 | 1 |
| hsa-miR-4756 NM_002661 | PLCG2 | 1 |
| hsa-miR-4763 NM_002661 | PLCG2 | 1 |
| hsa-miR-4436 NM_002661 | PLCG2 | 1 |
| hsa-miR-4782 NM_002661 | PLCG2 | 1 |
| hsa-miR-4784 NM_002661 | PLCG2 | 1 |
| hsa-miR-4798 NM_002661 | PLCG2 | 1 |
| hsa-miR-4799 NM_002661 | PLCG2 | 1 |
| hsa-miR-4800 NM_002661 | PLCG2 | 1 |
| hsa-miR-4802 NM_002661 | PLCG2 | 1 |
| hsa-miR-4999 NM_002661 | PLCG2 | 1 |
| hsa-miR-5002 NM_002661 | PLCG2 | 1 |
| hsa-miR-5088 NM_002661 | PLCG2 | 1 |
| hsa-miR-5089 NM_002661 | PLCG2 | 1 |
| hsa-miR-5089 NM_002661 | PLCG2 | 1 |
| hsa-miR-5187 NM_002661 | PLCG2 | 1 |
| hsa-miR-5191 NM_002661 | PLCG2 | 1 |
| hsa-miR-5194 NM_002661 | PLCG2 | 1 |
| hsa-miR-5194 NM_002661 | PLCG2 | 1 |
| hsa-miR-664b NM_002661 | PLCG2 | 1 |
| hsa-miR-664b NM_002661 | PLCG2 | 1 |
| hsa-miR-5581 NM_002661 | PLCG2 | 1 |
| hsa-miR-5584 NM_002661 | PLCG2 | 1 |
| hsa-miR-5591 NM_002661 | PLCG2 | 1 |
| hsa-miR-5591 NM_002661 | PLCG2 | 1 |
| hsa-miR-5681 NM_002661 | PLCG2 | 1 |
| hsa-miR-5682 NM_002661 | PLCG2 | 1 |
| hsa-miR-5683 NM_002661 | PLCG2 | 1 |
| hsa-miR-5685 NM_002661 | PLCG2 | 1 |
| hsa-miR-5698 NM_002661 | PLCG2 | 1 |
| hsa-miR-5739 NM_002661 | PLCG2 | 1 |
| hsa-miR-6078 NM_002661 | PLCG2 | 1 |
| hsa-miR-6089 NM_002661 | PLCG2 | 1 |
| hsa-miR-6090 NM_002661 | PLCG2 | 1 |
| hsa-miR-6130 NM_002661 | PLCG2 | 1 |
| hsa-miR-6132 NM_002661 | PLCG2 | 1 |
| hsa-miR-6500 NM_002661 | PLCG2 | 1 |
| hsa-miR-6501 NM_002661 | PLCG2 | 1 |
| hsa-miR-6505 NM_002661 | PLCG2 | 1 |



|                         |       |            |
|-------------------------|-------|------------|
| hsa-miR-990C NM_002661  | PLCG2 | 1          |
| hsa-miR-990C NM_002661  | PLCG2 | 1          |
| hsa-miR-103S NM_002661  | PLCG2 | 1          |
| hsa-miR-103S NM_002661  | PLCG2 | 1          |
| hsa-miR-104C NM_002661  | PLCG2 | 1          |
| hsa-miR-103S NM_002661  | PLCG2 | 1          |
| hsa-miR-103S NM_002661  | PLCG2 | 1          |
| hsa-miR-1052 NM_002661  | PLCG2 | 1          |
| hsa-miR-1118 NM_002661  | PLCG2 | 1          |
| hsa-miR-1118 NM_002661  | PLCG2 | 1          |
| hsa-miR-305S NM_002661  | PLCG2 | 1          |
| hsa-miR-305S NM_002661  | PLCG2 | 1          |
| hsa-miR-1211 NM_002661  | PLCG2 | 1          |
| hsa-miR-1213 NM_002661  | PLCG2 | 1          |
| hsa-miR-489- NM_002864  | PZP   | 1          |
| hsa-miR-5004 NM_002864  | PZP   | 1          |
| hsa-miR-7151 NM_002864  | PZP   | 1          |
| hsa-miR-192- NM_002901  | RCN1  | 0.96153846 |
| hsa-miR-622 NM_002901   | RCN1  | 0.96153846 |
| hsa-miR-3153 NM_002901  | RCN1  | 0.96153846 |
| hsa-miR-6886 NM_002901  | RCN1  | 0.96153846 |
| hsa-miR-6764 NM_002901  | RCN1  | 0.97435897 |
| hsa-let-7b-5p NM_002901 | RCN1  | 1          |
| hsa-let-7b-3p NM_002901 | RCN1  | 1          |
| hsa-let-7e-3p NM_002901 | RCN1  | 1          |
| hsa-miR-7-5p NM_002901  | RCN1  | 1          |
| hsa-miR-218- NM_002901  | RCN1  | 1          |
| hsa-let-7g-3p NM_002901 | RCN1  | 1          |
| hsa-miR-27b- NM_002901  | RCN1  | 1          |
| hsa-miR-133a NM_002901  | RCN1  | 1          |
| hsa-miR-150- NM_002901  | RCN1  | 1          |
| hsa-miR-186- NM_002901  | RCN1  | 1          |
| hsa-miR-188- NM_002901  | RCN1  | 1          |
| hsa-miR-299- NM_002901  | RCN1  | 1          |
| hsa-miR-299- NM_002901  | RCN1  | 1          |
| hsa-miR-133b NM_002901  | RCN1  | 1          |
| hsa-miR-325 NM_002901   | RCN1  | 1          |
| hsa-miR-519c NM_002901  | RCN1  | 1          |
| hsa-miR-519b NM_002901  | RCN1  | 1          |
| hsa-miR-525- NM_002901  | RCN1  | 1          |
| hsa-miR-523- NM_002901  | RCN1  | 1          |
| hsa-miR-518e NM_002901  | RCN1  | 1          |
| hsa-miR-518a NM_002901  | RCN1  | 1          |
| hsa-miR-520h NM_002901  | RCN1  | 1          |
| hsa-miR-522- NM_002901  | RCN1  | 1          |
| hsa-miR-519a NM_002901  | RCN1  | 1          |
| hsa-miR-584- NM_002901  | RCN1  | 1          |
| hsa-miR-550a NM_002901  | RCN1  | 1          |
| hsa-miR-597- NM_002901  | RCN1  | 1          |
| hsa-miR-618 NM_002901   | RCN1  | 1          |
| hsa-miR-622 NM_002901   | RCN1  | 1          |
| hsa-miR-647 NM_002901   | RCN1  | 1          |
| hsa-miR-670- NM_002901  | RCN1  | 1          |
| hsa-miR-450b NM_002901  | RCN1  | 1          |
| hsa-miR-744- NM_002901  | RCN1  | 1          |
| hsa-miR-885- NM_002901  | RCN1  | 1          |
| hsa-miR-877- NM_002901  | RCN1  | 1          |
| hsa-miR-1228 NM_002901  | RCN1  | 1          |
| hsa-miR-1287 NM_002901  | RCN1  | 1          |
| hsa-miR-1303 NM_002901  | RCN1  | 1          |
| hsa-miR-1278 NM_002901  | RCN1  | 1          |
| hsa-miR-1307 NM_002901  | RCN1  | 1          |
| hsa-miR-1908 NM_002901  | RCN1  | 1          |
| hsa-miR-1912 NM_002901  | RCN1  | 1          |
| hsa-miR-1914 NM_002901  | RCN1  | 1          |
| hsa-miR-1914 NM_002901  | RCN1  | 1          |
| hsa-miR-1972 NM_002901  | RCN1  | 1          |
| hsa-miR-3116 NM_002901  | RCN1  | 1          |
| hsa-miR-3135 NM_002901  | RCN1  | 1          |
| hsa-miR-3136 NM_002901  | RCN1  | 1          |
| hsa-miR-544b NM_002901  | RCN1  | 1          |
| hsa-miR-3151 NM_002901  | RCN1  | 1          |
| hsa-miR-318C NM_002901  | RCN1  | 1          |
| hsa-miR-3183 NM_002901  | RCN1  | 1          |
| hsa-miR-3185 NM_002901  | RCN1  | 1          |
| hsa-miR-3191 NM_002901  | RCN1  | 1          |
| hsa-miR-425S NM_002901  | RCN1  | 1          |
| hsa-miR-4254 NM_002901  | RCN1  | 1          |
| hsa-miR-4327 NM_002901  | RCN1  | 1          |
| hsa-miR-2355 NM_002901  | RCN1  | 1          |
| hsa-miR-432S NM_002901  | RCN1  | 1          |
| hsa-miR-365C NM_002901  | RCN1  | 1          |
| hsa-miR-368C NM_002901  | RCN1  | 1          |
| hsa-miR-3934 NM_002901  | RCN1  | 1          |
| hsa-miR-394C NM_002901  | RCN1  | 1          |
| hsa-miR-4418 NM_002901  | RCN1  | 1          |
| hsa-miR-4433 NM_002901  | RCN1  | 1          |
| hsa-miR-4446 NM_002901  | RCN1  | 1          |
| hsa-miR-4463 NM_002901  | RCN1  | 1          |
| hsa-miR-450S NM_002901  | RCN1  | 1          |
| hsa-miR-451C NM_002901  | RCN1  | 1          |
| hsa-miR-4522 NM_002901  | RCN1  | 1          |
| hsa-miR-4632 NM_002901  | RCN1  | 1          |
| hsa-miR-463S NM_002901  | RCN1  | 1          |



|                         |       |            |
|-------------------------|-------|------------|
| hsa-miR-4676 NM_002901  | RCN1  | 1          |
| hsa-miR-4710 NM_002901  | RCN1  | 1          |
| hsa-miR-4714 NM_002901  | RCN1  | 1          |
| hsa-miR-4727 NM_002901  | RCN1  | 1          |
| hsa-miR-4738 NM_002901  | RCN1  | 1          |
| hsa-miR-4756 NM_002901  | RCN1  | 1          |
| hsa-miR-4768 NM_002901  | RCN1  | 1          |
| hsa-miR-4769 NM_002901  | RCN1  | 1          |
| hsa-miR-1245 NM_002901  | RCN1  | 1          |
| hsa-miR-4786 NM_002901  | RCN1  | 1          |
| hsa-miR-4797 NM_002901  | RCN1  | 1          |
| hsa-miR-4802 NM_002901  | RCN1  | 1          |
| hsa-miR-5000 NM_002901  | RCN1  | 1          |
| hsa-miR-5002 NM_002901  | RCN1  | 1          |
| hsa-miR-5008 NM_002901  | RCN1  | 1          |
| hsa-miR-5089 NM_002901  | RCN1  | 1          |
| hsa-miR-5190 NM_002901  | RCN1  | 1          |
| hsa-miR-4524 NM_002901  | RCN1  | 1          |
| hsa-miR-5589 NM_002901  | RCN1  | 1          |
| hsa-miR-5694 NM_002901  | RCN1  | 1          |
| hsa-miR-5698 NM_002901  | RCN1  | 1          |
| hsa-miR-1199 NM_002901  | RCN1  | 1          |
| hsa-miR-6130 NM_002901  | RCN1  | 1          |
| hsa-miR-6500 NM_002901  | RCN1  | 1          |
| hsa-miR-6501 NM_002901  | RCN1  | 1          |
| hsa-miR-6507 NM_002901  | RCN1  | 1          |
| hsa-miR-6511 NM_002901  | RCN1  | 1          |
| hsa-miR-6513 NM_002901  | RCN1  | 1          |
| hsa-miR-6513 NM_002901  | RCN1  | 1          |
| hsa-miR-6513 NM_002901  | RCN1  | 1          |
| hsa-miR-6514 NM_002901  | RCN1  | 1          |
| hsa-miR-6514 NM_002901  | RCN1  | 1          |
| hsa-miR-6511 NM_002901  | RCN1  | 1          |
| hsa-miR-6726 NM_002901  | RCN1  | 1          |
| hsa-miR-6736 NM_002901  | RCN1  | 1          |
| hsa-miR-6736 NM_002901  | RCN1  | 1          |
| hsa-miR-6736 NM_002901  | RCN1  | 1          |
| hsa-miR-6740 NM_002901  | RCN1  | 1          |
| hsa-miR-6745 NM_002901  | RCN1  | 1          |
| hsa-miR-6747 NM_002901  | RCN1  | 1          |
| hsa-miR-6748 NM_002901  | RCN1  | 1          |
| hsa-miR-6755 NM_002901  | RCN1  | 1          |
| hsa-miR-6762 NM_002901  | RCN1  | 1          |
| hsa-miR-6767 NM_002901  | RCN1  | 1          |
| hsa-miR-6767 NM_002901  | RCN1  | 1          |
| hsa-miR-6772 NM_002901  | RCN1  | 1          |
| hsa-miR-6776 NM_002901  | RCN1  | 1          |
| hsa-miR-6776 NM_002901  | RCN1  | 1          |
| hsa-miR-6778 NM_002901  | RCN1  | 1          |
| hsa-miR-6778 NM_002901  | RCN1  | 1          |
| hsa-miR-6781 NM_002901  | RCN1  | 1          |
| hsa-miR-6781 NM_002901  | RCN1  | 1          |
| hsa-miR-6792 NM_002901  | RCN1  | 1          |
| hsa-miR-6797 NM_002901  | RCN1  | 1          |
| hsa-miR-6795 NM_002901  | RCN1  | 1          |
| hsa-miR-6801 NM_002901  | RCN1  | 1          |
| hsa-miR-6801 NM_002901  | RCN1  | 1          |
| hsa-miR-6807 NM_002901  | RCN1  | 1          |
| hsa-miR-6813 NM_002901  | RCN1  | 1          |
| hsa-miR-6815 NM_002901  | RCN1  | 1          |
| hsa-miR-6817 NM_002901  | RCN1  | 1          |
| hsa-miR-6828 NM_002901  | RCN1  | 1          |
| hsa-miR-6833 NM_002901  | RCN1  | 1          |
| hsa-miR-6836 NM_002901  | RCN1  | 1          |
| hsa-miR-6849 NM_002901  | RCN1  | 1          |
| hsa-miR-6854 NM_002901  | RCN1  | 1          |
| hsa-miR-6855 NM_002901  | RCN1  | 1          |
| hsa-miR-6867 NM_002901  | RCN1  | 1          |
| hsa-miR-6876 NM_002901  | RCN1  | 1          |
| hsa-miR-6881 NM_002901  | RCN1  | 1          |
| hsa-miR-6883 NM_002901  | RCN1  | 1          |
| hsa-miR-6890 NM_002901  | RCN1  | 1          |
| hsa-miR-6894 NM_002901  | RCN1  | 1          |
| hsa-miR-6895 NM_002901  | RCN1  | 1          |
| hsa-miR-7111 NM_002901  | RCN1  | 1          |
| hsa-miR-7150 NM_002901  | RCN1  | 1          |
| hsa-miR-7705 NM_002901  | RCN1  | 1          |
| hsa-miR-4433 NM_002901  | RCN1  | 1          |
| hsa-miR-7848 NM_002901  | RCN1  | 1          |
| hsa-miR-8056 NM_002901  | RCN1  | 1          |
| hsa-miR-8062 NM_002901  | RCN1  | 1          |
| hsa-miR-8087 NM_002901  | RCN1  | 1          |
| hsa-miR-1035 NM_002901  | RCN1  | 1          |
| hsa-miR-1211 NM_002901  | RCN1  | 1          |
| hsa-miR-1212 NM_002901  | RCN1  | 1          |
| hsa-miR-1213 NM_002901  | RCN1  | 1          |
| hsa-miR-593-; NM_144766 | RGS13 | 0.96153846 |
| hsa-miR-593-; NM_002927 | RGS13 | 0.96153846 |
| hsa-miR-1231 NM_144766  | RGS13 | 0.96923077 |
| hsa-miR-1231 NM_002927  | RGS13 | 0.96923077 |
| hsa-let-7d-3p NM_144766 | RGS13 | 1          |
| hsa-miR-17-3j NM_144766 | RGS13 | 1          |
| hsa-miR-329-; NM_144766 | RGS13 | 1          |
| hsa-miR-1228 NM_144766  | RGS13 | 1          |
| hsa-miR-1268 NM_144766  | RGS13 | 1          |
| hsa-miR-3141 NM_144766  | RGS13 | 1          |

|                         |         |            |
|-------------------------|---------|------------|
| hsa-miR-323b NM_144766  | RGS13   | 1          |
| hsa-miR-6495 NM_144766  | RGS13   | 1          |
| hsa-miR-6858 NM_144766  | RGS13   | 1          |
| hsa-miR-6887 NM_144766  | RGS13   | 1          |
| hsa-miR-716c NM_144766  | RGS13   | 1          |
| hsa-let-7d-3p NM_002927 | RGS13   | 1          |
| hsa-miR-17-3j NM_002927 | RGS13   | 1          |
| hsa-miR-329j NM_002927  | RGS13   | 1          |
| hsa-miR-1228 NM_002927  | RGS13   | 1          |
| hsa-miR-1268 NM_002927  | RGS13   | 1          |
| hsa-miR-3141 NM_002927  | RGS13   | 1          |
| hsa-miR-323b NM_002927  | RGS13   | 1          |
| hsa-miR-6495 NM_002927  | RGS13   | 1          |
| hsa-miR-6887 NM_002927  | RGS13   | 1          |
| hsa-miR-716c NM_002927  | RGS13   | 1          |
| hsa-miR-1224 NM_003059  | SLC22A4 | 1          |
| hsa-miR-1205 NM_003059  | SLC22A4 | 1          |
| hsa-miR-3155 NM_003059  | SLC22A4 | 1          |
| hsa-miR-3612 NM_003059  | SLC22A4 | 1          |
| hsa-miR-3616 NM_003059  | SLC22A4 | 1          |
| hsa-miR-3913 NM_003059  | SLC22A4 | 1          |
| hsa-miR-315c NM_003059  | SLC22A4 | 1          |
| hsa-miR-4482 NM_003059  | SLC22A4 | 1          |
| hsa-miR-4713 NM_003059  | SLC22A4 | 1          |
| hsa-miR-479c NM_003059  | SLC22A4 | 1          |
| hsa-miR-6792 NM_003059  | SLC22A4 | 1          |
| hsa-miR-6846 NM_003059  | SLC22A4 | 1          |
| hsa-miR-6765 NM_003059  | SLC22A4 | 1          |
| hsa-miR-8086 NM_003059  | SLC22A4 | 1          |
| hsa-miR-129- NM_003064  | SLPI    | 0.96153846 |
| hsa-miR-129- NM_003064  | SLPI    | 0.96153846 |
| hsa-miR-6512 NM_003064  | SLPI    | 0.96153846 |
| hsa-miR-7106 NM_003064  | SLPI    | 0.96923077 |
| hsa-miR-93-3j NM_003064 | SLPI    | 1          |
| hsa-miR-125a NM_003064  | SLPI    | 1          |
| hsa-miR-185- NM_003064  | SLPI    | 1          |
| hsa-miR-504- NM_003064  | SLPI    | 1          |
| hsa-miR-658 NM_003064   | SLPI    | 1          |
| hsa-miR-1271 NM_003064  | SLPI    | 1          |
| hsa-miR-1185 NM_003064  | SLPI    | 1          |
| hsa-miR-1185 NM_003064  | SLPI    | 1          |
| hsa-miR-300 NM_003064   | SLPI    | 1          |
| hsa-miR-887- NM_003064  | SLPI    | 1          |
| hsa-miR-937- NM_003064  | SLPI    | 1          |
| hsa-miR-939- NM_003064  | SLPI    | 1          |
| hsa-miR-941 NM_003064   | SLPI    | 1          |
| hsa-miR-1178 NM_003064  | SLPI    | 1          |
| hsa-miR-1184 NM_003064  | SLPI    | 1          |
| hsa-miR-1227 NM_003064  | SLPI    | 1          |
| hsa-miR-1227 NM_003064  | SLPI    | 1          |
| hsa-miR-663b NM_003064  | SLPI    | 1          |
| hsa-miR-1207 NM_003064  | SLPI    | 1          |
| hsa-miR-1245 NM_003064  | SLPI    | 1          |
| hsa-miR-1258 NM_003064  | SLPI    | 1          |
| hsa-miR-1905 NM_003064  | SLPI    | 1          |
| hsa-miR-191c NM_003064  | SLPI    | 1          |
| hsa-miR-3151 NM_003064  | SLPI    | 1          |
| hsa-miR-3173 NM_003064  | SLPI    | 1          |
| hsa-miR-3196 NM_003064  | SLPI    | 1          |
| hsa-miR-4257 NM_003064  | SLPI    | 1          |
| hsa-miR-427c NM_003064  | SLPI    | 1          |
| hsa-miR-3688 NM_003064  | SLPI    | 1          |
| hsa-miR-394c NM_003064  | SLPI    | 1          |
| hsa-miR-4435 NM_003064  | SLPI    | 1          |
| hsa-miR-4463 NM_003064  | SLPI    | 1          |
| hsa-miR-4466 NM_003064  | SLPI    | 1          |
| hsa-miR-447c NM_003064  | SLPI    | 1          |
| hsa-miR-4481 NM_003064  | SLPI    | 1          |
| hsa-miR-4538 NM_003064  | SLPI    | 1          |
| hsa-miR-4651 NM_003064  | SLPI    | 1          |
| hsa-miR-4657 NM_003064  | SLPI    | 1          |
| hsa-miR-4688 NM_003064  | SLPI    | 1          |
| hsa-miR-4725 NM_003064  | SLPI    | 1          |
| hsa-miR-4747 NM_003064  | SLPI    | 1          |
| hsa-miR-4767 NM_003064  | SLPI    | 1          |
| hsa-miR-4768 NM_003064  | SLPI    | 1          |
| hsa-miR-4768 NM_003064  | SLPI    | 1          |
| hsa-miR-478c NM_003064  | SLPI    | 1          |
| hsa-miR-4783 NM_003064  | SLPI    | 1          |
| hsa-miR-5001 NM_003064  | SLPI    | 1          |
| hsa-miR-5591 NM_003064  | SLPI    | 1          |
| hsa-miR-5695 NM_003064  | SLPI    | 1          |
| hsa-miR-5695 NM_003064  | SLPI    | 1          |
| hsa-miR-5695 NM_003064  | SLPI    | 1          |
| hsa-miR-5705 NM_003064  | SLPI    | 1          |
| hsa-miR-5735 NM_003064  | SLPI    | 1          |
| hsa-miR-6075 NM_003064  | SLPI    | 1          |
| hsa-miR-650c NM_003064  | SLPI    | 1          |
| hsa-miR-6511 NM_003064  | SLPI    | 1          |
| hsa-miR-6726 NM_003064  | SLPI    | 1          |
| hsa-miR-6732 NM_003064  | SLPI    | 1          |
| hsa-miR-6737 NM_003064  | SLPI    | 1          |
| hsa-miR-6744 NM_003064  | SLPI    | 1          |
| hsa-miR-6745 NM_003064  | SLPI    | 1          |
| hsa-miR-6757 NM_003064  | SLPI    | 1          |

|                         |      |            |
|-------------------------|------|------------|
| hsa-miR-6765 NM_003064  | SLPI | 1          |
| hsa-miR-6776 NM_003064  | SLPI | 1          |
| hsa-miR-6786 NM_003064  | SLPI | 1          |
| hsa-miR-6798 NM_003064  | SLPI | 1          |
| hsa-miR-6807 NM_003064  | SLPI | 1          |
| hsa-miR-6813 NM_003064  | SLPI | 1          |
| hsa-miR-6819 NM_003064  | SLPI | 1          |
| hsa-miR-6829 NM_003064  | SLPI | 1          |
| hsa-miR-6892 NM_003064  | SLPI | 1          |
| hsa-miR-7111 NM_003064  | SLPI | 1          |
| hsa-miR-7112 NM_003064  | SLPI | 1          |
| hsa-miR-7706 NM_003064  | SLPI | 1          |
| hsa-miR-7846 NM_003064  | SLPI | 1          |
| hsa-miR-8071 NM_003064  | SLPI | 1          |
| hsa-miR-8083 NM_003064  | SLPI | 1          |
| hsa-miR-1039 NM_003064  | SLPI | 1          |
| hsa-miR-1118 NM_003064  | SLPI | 1          |
| hsa-miR-1267 NM_003107  | SOX4 | 0.96153846 |
| hsa-miR-1288 NM_003107  | SOX4 | 0.96153846 |
| hsa-miR-315C NM_003107  | SOX4 | 0.96153846 |
| hsa-miR-4694 NM_003107  | SOX4 | 0.96153846 |
| hsa-miR-4716 NM_003107  | SOX4 | 0.96153846 |
| hsa-miR-4524 NM_003107  | SOX4 | 0.96153846 |
| hsa-miR-6878 NM_003107  | SOX4 | 0.96153846 |
| hsa-miR-3664 NM_003107  | SOX4 | 0.96923077 |
| hsa-miR-198 NM_003107   | SOX4 | 0.97435897 |
| hsa-miR-6507 NM_003107  | SOX4 | 0.97435897 |
| hsa-miR-6765 NM_003107  | SOX4 | 0.97435897 |
| hsa-miR-316C NM_003107  | SOX4 | 0.97435897 |
| hsa-miR-3184 NM_003107  | SOX4 | 0.97435897 |
| hsa-miR-191- NM_003107  | SOX4 | 0.98076923 |
| hsa-miR-296- NM_003107  | SOX4 | 0.98076923 |
| hsa-miR-519e NM_003107  | SOX4 | 0.98076923 |
| hsa-miR-711C NM_003107  | SOX4 | 0.98076923 |
| hsa-miR-6771 NM_003107  | SOX4 | 0.98717949 |
| hsa-miR-6847 NM_003107  | SOX4 | 0.98717949 |
| hsa-let-7e-3p NM_003107 | SOX4 | 1          |
| hsa-miR-17-5j NM_003107 | SOX4 | 1          |
| hsa-miR-22-5j NM_003107 | SOX4 | 1          |
| hsa-miR-29a- NM_003107  | SOX4 | 1          |
| hsa-miR-93-3j NM_003107 | SOX4 | 1          |
| hsa-miR-198 NM_003107   | SOX4 | 1          |
| hsa-miR-129- NM_003107  | SOX4 | 1          |
| hsa-miR-10a- NM_003107  | SOX4 | 1          |
| hsa-miR-181a NM_003107  | SOX4 | 1          |
| hsa-miR-204- NM_003107  | SOX4 | 1          |
| hsa-miR-205- NM_003107  | SOX4 | 1          |
| hsa-miR-205- NM_003107  | SOX4 | 1          |
| hsa-miR-211- NM_003107  | SOX4 | 1          |
| hsa-miR-212- NM_003107  | SOX4 | 1          |
| hsa-miR-215- NM_003107  | SOX4 | 1          |
| hsa-miR-30b- NM_003107  | SOX4 | 1          |
| hsa-miR-122- NM_003107  | SOX4 | 1          |
| hsa-miR-137- NM_003107  | SOX4 | 1          |
| hsa-miR-191- NM_003107  | SOX4 | 1          |
| hsa-miR-129- NM_003107  | SOX4 | 1          |
| hsa-miR-194- NM_003107  | SOX4 | 1          |
| hsa-miR-195- NM_003107  | SOX4 | 1          |
| hsa-miR-194- NM_003107  | SOX4 | 1          |
| hsa-miR-106b NM_003107  | SOX4 | 1          |
| hsa-miR-200a NM_003107  | SOX4 | 1          |
| hsa-miR-296- NM_003107  | SOX4 | 1          |
| hsa-miR-363- NM_003107  | SOX4 | 1          |
| hsa-miR-376a NM_003107  | SOX4 | 1          |
| hsa-miR-377- NM_003107  | SOX4 | 1          |
| hsa-miR-378a NM_003107  | SOX4 | 1          |
| hsa-miR-328- NM_003107  | SOX4 | 1          |
| hsa-miR-328- NM_003107  | SOX4 | 1          |
| hsa-miR-337- NM_003107  | SOX4 | 1          |
| hsa-miR-331- NM_003107  | SOX4 | 1          |
| hsa-miR-324- NM_003107  | SOX4 | 1          |
| hsa-miR-338- NM_003107  | SOX4 | 1          |
| hsa-miR-325 NM_003107   | SOX4 | 1          |
| hsa-miR-425- NM_003107  | SOX4 | 1          |
| hsa-miR-18b- NM_003107  | SOX4 | 1          |
| hsa-miR-449a NM_003107  | SOX4 | 1          |
| hsa-miR-483- NM_003107  | SOX4 | 1          |
| hsa-miR-483- NM_003107  | SOX4 | 1          |
| hsa-miR-483- NM_003107  | SOX4 | 1          |
| hsa-miR-484 NM_003107   | SOX4 | 1          |
| hsa-miR-491- NM_003107  | SOX4 | 1          |
| hsa-miR-146b NM_003107  | SOX4 | 1          |
| hsa-miR-495- NM_003107  | SOX4 | 1          |
| hsa-miR-518c NM_003107  | SOX4 | 1          |
| hsa-miR-502- NM_003107  | SOX4 | 1          |
| hsa-miR-504- NM_003107  | SOX4 | 1          |
| hsa-miR-507 NM_003107   | SOX4 | 1          |
| hsa-miR-455- NM_003107  | SOX4 | 1          |
| hsa-miR-551a NM_003107  | SOX4 | 1          |
| hsa-miR-558 NM_003107   | SOX4 | 1          |
| hsa-miR-570- NM_003107  | SOX4 | 1          |
| hsa-miR-575 NM_003107   | SOX4 | 1          |
| hsa-miR-578 NM_003107   | SOX4 | 1          |
| hsa-miR-605- NM_003107  | SOX4 | 1          |

|              |           |      |   |
|--------------|-----------|------|---|
| hsa-miR-608  | NM_003107 | SOX4 | 1 |
| hsa-miR-627- | NM_003107 | SOX4 | 1 |
| hsa-miR-629- | NM_003107 | SOX4 | 1 |
| hsa-miR-631  | NM_003107 | SOX4 | 1 |
| hsa-miR-661  | NM_003107 | SOX4 | 1 |
| hsa-miR-449b | NM_003107 | SOX4 | 1 |
| hsa-miR-549a | NM_003107 | SOX4 | 1 |
| hsa-miR-1296 | NM_003107 | SOX4 | 1 |
| hsa-miR-1185 | NM_003107 | SOX4 | 1 |
| hsa-miR-769- | NM_003107 | SOX4 | 1 |
| hsa-miR-769- | NM_003107 | SOX4 | 1 |
| hsa-miR-1185 | NM_003107 | SOX4 | 1 |
| hsa-miR-298  | NM_003107 | SOX4 | 1 |
| hsa-miR-541- | NM_003107 | SOX4 | 1 |
| hsa-miR-877- | NM_003107 | SOX4 | 1 |
| hsa-miR-877- | NM_003107 | SOX4 | 1 |
| hsa-miR-877- | NM_003107 | SOX4 | 1 |
| hsa-miR-887- | NM_003107 | SOX4 | 1 |
| hsa-miR-873- | NM_003107 | SOX4 | 1 |
| hsa-miR-216b | NM_003107 | SOX4 | 1 |
| hsa-miR-933  | NM_003107 | SOX4 | 1 |
| hsa-miR-936  | NM_003107 | SOX4 | 1 |
| hsa-miR-942- | NM_003107 | SOX4 | 1 |
| hsa-miR-1178 | NM_003107 | SOX4 | 1 |
| hsa-miR-1180 | NM_003107 | SOX4 | 1 |
| hsa-miR-1228 | NM_003107 | SOX4 | 1 |
| hsa-miR-1236 | NM_003107 | SOX4 | 1 |
| hsa-miR-1238 | NM_003107 | SOX4 | 1 |
| hsa-miR-1207 | NM_003107 | SOX4 | 1 |
| hsa-miR-1247 | NM_003107 | SOX4 | 1 |
| hsa-miR-1266 | NM_003107 | SOX4 | 1 |
| hsa-miR-1470 | NM_003107 | SOX4 | 1 |
| hsa-miR-103b | NM_003107 | SOX4 | 1 |
| hsa-miR-2114 | NM_003107 | SOX4 | 1 |
| hsa-miR-3122 | NM_003107 | SOX4 | 1 |
| hsa-miR-3124 | NM_003107 | SOX4 | 1 |
| hsa-miR-3124 | NM_003107 | SOX4 | 1 |
| hsa-miR-3138 | NM_003107 | SOX4 | 1 |
| hsa-miR-548v | NM_003107 | SOX4 | 1 |
| hsa-miR-3152 | NM_003107 | SOX4 | 1 |
| hsa-miR-3156 | NM_003107 | SOX4 | 1 |
| hsa-miR-3158 | NM_003107 | SOX4 | 1 |
| hsa-miR-3162 | NM_003107 | SOX4 | 1 |
| hsa-miR-323b | NM_003107 | SOX4 | 1 |
| hsa-miR-3174 | NM_003107 | SOX4 | 1 |
| hsa-miR-3180 | NM_003107 | SOX4 | 1 |
| hsa-miR-3186 | NM_003107 | SOX4 | 1 |
| hsa-miR-3192 | NM_003107 | SOX4 | 1 |
| hsa-miR-4297 | NM_003107 | SOX4 | 1 |
| hsa-miR-4308 | NM_003107 | SOX4 | 1 |
| hsa-miR-4308 | NM_003107 | SOX4 | 1 |
| hsa-miR-4316 | NM_003107 | SOX4 | 1 |
| hsa-miR-4324 | NM_003107 | SOX4 | 1 |
| hsa-miR-4326 | NM_003107 | SOX4 | 1 |
| hsa-miR-4268 | NM_003107 | SOX4 | 1 |
| hsa-miR-4279 | NM_003107 | SOX4 | 1 |
| hsa-miR-4279 | NM_003107 | SOX4 | 1 |
| hsa-miR-4279 | NM_003107 | SOX4 | 1 |
| hsa-miR-4285 | NM_003107 | SOX4 | 1 |
| hsa-miR-4288 | NM_003107 | SOX4 | 1 |
| hsa-miR-4329 | NM_003107 | SOX4 | 1 |
| hsa-miR-3605 | NM_003107 | SOX4 | 1 |
| hsa-miR-3613 | NM_003107 | SOX4 | 1 |
| hsa-miR-3614 | NM_003107 | SOX4 | 1 |
| hsa-miR-3622 | NM_003107 | SOX4 | 1 |
| hsa-miR-3667 | NM_003107 | SOX4 | 1 |
| hsa-miR-3675 | NM_003107 | SOX4 | 1 |
| hsa-miR-3677 | NM_003107 | SOX4 | 1 |
| hsa-miR-3679 | NM_003107 | SOX4 | 1 |
| hsa-miR-3689 | NM_003107 | SOX4 | 1 |
| hsa-miR-3689 | NM_003107 | SOX4 | 1 |
| hsa-miR-3689 | NM_003107 | SOX4 | 1 |
| hsa-miR-3689 | NM_003107 | SOX4 | 1 |
| hsa-miR-3921 | NM_003107 | SOX4 | 1 |
| hsa-miR-3936 | NM_003107 | SOX4 | 1 |
| hsa-miR-3939 | NM_003107 | SOX4 | 1 |
| hsa-miR-3940 | NM_003107 | SOX4 | 1 |
| hsa-miR-4428 | NM_003107 | SOX4 | 1 |
| hsa-miR-4428 | NM_003107 | SOX4 | 1 |
| hsa-miR-4446 | NM_003107 | SOX4 | 1 |
| hsa-miR-4456 | NM_003107 | SOX4 | 1 |
| hsa-miR-4457 | NM_003107 | SOX4 | 1 |
| hsa-miR-4460 | NM_003107 | SOX4 | 1 |
| hsa-miR-4462 | NM_003107 | SOX4 | 1 |
| hsa-miR-4464 | NM_003107 | SOX4 | 1 |
| hsa-miR-4474 | NM_003107 | SOX4 | 1 |
| hsa-miR-3689 | NM_003107 | SOX4 | 1 |
| hsa-miR-3689 | NM_003107 | SOX4 | 1 |
| hsa-miR-4482 | NM_003107 | SOX4 | 1 |
| hsa-miR-4486 | NM_003107 | SOX4 | 1 |
| hsa-miR-4491 | NM_003107 | SOX4 | 1 |
| hsa-miR-4493 | NM_003107 | SOX4 | 1 |
| hsa-miR-4513 | NM_003107 | SOX4 | 1 |
| hsa-miR-4514 | NM_003107 | SOX4 | 1 |
| hsa-miR-4520 | NM_003107 | SOX4 | 1 |
| hsa-miR-4522 | NM_003107 | SOX4 | 1 |



|                         |         |            |
|-------------------------|---------|------------|
| hsa-miR-6758 NM_003107  | SOX4    | 1          |
| hsa-miR-6760 NM_003107  | SOX4    | 1          |
| hsa-miR-6760 NM_003107  | SOX4    | 1          |
| hsa-miR-6762 NM_003107  | SOX4    | 1          |
| hsa-miR-6763 NM_003107  | SOX4    | 1          |
| hsa-miR-6766 NM_003107  | SOX4    | 1          |
| hsa-miR-6767 NM_003107  | SOX4    | 1          |
| hsa-miR-6767 NM_003107  | SOX4    | 1          |
| hsa-miR-6769 NM_003107  | SOX4    | 1          |
| hsa-miR-6773 NM_003107  | SOX4    | 1          |
| hsa-miR-6777 NM_003107  | SOX4    | 1          |
| hsa-miR-6778 NM_003107  | SOX4    | 1          |
| hsa-miR-6779 NM_003107  | SOX4    | 1          |
| hsa-miR-6780 NM_003107  | SOX4    | 1          |
| hsa-miR-6780 NM_003107  | SOX4    | 1          |
| hsa-miR-6781 NM_003107  | SOX4    | 1          |
| hsa-miR-6784 NM_003107  | SOX4    | 1          |
| hsa-miR-6786 NM_003107  | SOX4    | 1          |
| hsa-miR-6786 NM_003107  | SOX4    | 1          |
| hsa-miR-6787 NM_003107  | SOX4    | 1          |
| hsa-miR-6788 NM_003107  | SOX4    | 1          |
| hsa-miR-6792 NM_003107  | SOX4    | 1          |
| hsa-miR-6793 NM_003107  | SOX4    | 1          |
| hsa-miR-6794 NM_003107  | SOX4    | 1          |
| hsa-miR-6795 NM_003107  | SOX4    | 1          |
| hsa-miR-6798 NM_003107  | SOX4    | 1          |
| hsa-miR-6808 NM_003107  | SOX4    | 1          |
| hsa-miR-6809 NM_003107  | SOX4    | 1          |
| hsa-miR-6817 NM_003107  | SOX4    | 1          |
| hsa-miR-6818 NM_003107  | SOX4    | 1          |
| hsa-miR-6819 NM_003107  | SOX4    | 1          |
| hsa-miR-6823 NM_003107  | SOX4    | 1          |
| hsa-miR-6823 NM_003107  | SOX4    | 1          |
| hsa-miR-6826 NM_003107  | SOX4    | 1          |
| hsa-miR-6828 NM_003107  | SOX4    | 1          |
| hsa-miR-6833 NM_003107  | SOX4    | 1          |
| hsa-miR-6833 NM_003107  | SOX4    | 1          |
| hsa-miR-6837 NM_003107  | SOX4    | 1          |
| hsa-miR-6839 NM_003107  | SOX4    | 1          |
| hsa-miR-6843 NM_003107  | SOX4    | 1          |
| hsa-miR-6843 NM_003107  | SOX4    | 1          |
| hsa-miR-6845 NM_003107  | SOX4    | 1          |
| hsa-miR-6848 NM_003107  | SOX4    | 1          |
| hsa-miR-6769 NM_003107  | SOX4    | 1          |
| hsa-miR-6862 NM_003107  | SOX4    | 1          |
| hsa-miR-6864 NM_003107  | SOX4    | 1          |
| hsa-miR-6865 NM_003107  | SOX4    | 1          |
| hsa-miR-6870 NM_003107  | SOX4    | 1          |
| hsa-miR-6871 NM_003107  | SOX4    | 1          |
| hsa-miR-6877 NM_003107  | SOX4    | 1          |
| hsa-miR-6878 NM_003107  | SOX4    | 1          |
| hsa-miR-6878 NM_003107  | SOX4    | 1          |
| hsa-miR-6879 NM_003107  | SOX4    | 1          |
| hsa-miR-6879 NM_003107  | SOX4    | 1          |
| hsa-miR-6880 NM_003107  | SOX4    | 1          |
| hsa-miR-6882 NM_003107  | SOX4    | 1          |
| hsa-miR-6883 NM_003107  | SOX4    | 1          |
| hsa-miR-6883 NM_003107  | SOX4    | 1          |
| hsa-miR-6885 NM_003107  | SOX4    | 1          |
| hsa-miR-6886 NM_003107  | SOX4    | 1          |
| hsa-miR-6887 NM_003107  | SOX4    | 1          |
| hsa-miR-6889 NM_003107  | SOX4    | 1          |
| hsa-miR-6891 NM_003107  | SOX4    | 1          |
| hsa-miR-6892 NM_003107  | SOX4    | 1          |
| hsa-miR-7106 NM_003107  | SOX4    | 1          |
| hsa-miR-7111 NM_003107  | SOX4    | 1          |
| hsa-miR-7111 NM_003107  | SOX4    | 1          |
| hsa-miR-7111 NM_003107  | SOX4    | 1          |
| hsa-miR-7151 NM_003107  | SOX4    | 1          |
| hsa-miR-7160 NM_003107  | SOX4    | 1          |
| hsa-miR-7843 NM_003107  | SOX4    | 1          |
| hsa-miR-7843 NM_003107  | SOX4    | 1          |
| hsa-miR-7850 NM_003107  | SOX4    | 1          |
| hsa-miR-7976 NM_003107  | SOX4    | 1          |
| hsa-miR-8056 NM_003107  | SOX4    | 1          |
| hsa-miR-8057 NM_003107  | SOX4    | 1          |
| hsa-miR-8075 NM_003107  | SOX4    | 1          |
| hsa-miR-8080 NM_003107  | SOX4    | 1          |
| hsa-miR-9898 NM_003107  | SOX4    | 1          |
| hsa-miR-1039 NM_003107  | SOX4    | 1          |
| hsa-miR-1140 NM_003107  | SOX4    | 1          |
| hsa-miR-9851 NM_003107  | SOX4    | 1          |
| hsa-miR-1212 NM_003107  | SOX4    | 1          |
| hsa-miR-1212 NM_003107  | SOX4    | 1          |
| hsa-miR-6731 NM_003357  | SCGB1A1 | 0.96153846 |
| hsa-miR-6881 NM_003357  | SCGB1A1 | 0.96153846 |
| hsa-miR-4688 NM_003357  | SCGB1A1 | 0.98076923 |
| hsa-miR-1039 NM_003357  | SCGB1A1 | 0.98076923 |
| hsa-miR-92a-; NM_003357 | SCGB1A1 | 1          |
| hsa-miR-30c-; NM_003357 | SCGB1A1 | 1          |
| hsa-miR-183-; NM_003357 | SCGB1A1 | 1          |
| hsa-miR-185-; NM_003357 | SCGB1A1 | 1          |
| hsa-miR-432-; NM_003357 | SCGB1A1 | 1          |
| hsa-miR-1180 NM_003357  | SCGB1A1 | 1          |
| hsa-miR-1226 NM_003357  | SCGB1A1 | 1          |
| hsa-miR-1266 NM_003357  | SCGB1A1 | 1          |

|               |            |         |            |
|---------------|------------|---------|------------|
| hsa-miR-1275  | NM_003357  | SCGB1A1 | 1          |
| hsa-miR-3131  | NM_003357  | SCGB1A1 | 1          |
| hsa-miR-3162  | NM_003357  | SCGB1A1 | 1          |
| hsa-miR-3188  | NM_003357  | SCGB1A1 | 1          |
| hsa-miR-3190  | NM_003357  | SCGB1A1 | 1          |
| hsa-miR-3663  | NM_003357  | SCGB1A1 | 1          |
| hsa-miR-3675  | NM_003357  | SCGB1A1 | 1          |
| hsa-miR-3937  | NM_003357  | SCGB1A1 | 1          |
| hsa-miR-4437  | NM_003357  | SCGB1A1 | 1          |
| hsa-miR-4447  | NM_003357  | SCGB1A1 | 1          |
| hsa-miR-3960  | NM_003357  | SCGB1A1 | 1          |
| hsa-miR-4645  | NM_003357  | SCGB1A1 | 1          |
| hsa-miR-4660  | NM_003357  | SCGB1A1 | 1          |
| hsa-miR-4687  | NM_003357  | SCGB1A1 | 1          |
| hsa-miR-4685  | NM_003357  | SCGB1A1 | 1          |
| hsa-miR-4752  | NM_003357  | SCGB1A1 | 1          |
| hsa-miR-4766  | NM_003357  | SCGB1A1 | 1          |
| hsa-miR-4796  | NM_003357  | SCGB1A1 | 1          |
| hsa-miR-6734  | NM_003357  | SCGB1A1 | 1          |
| hsa-miR-6741  | NM_003357  | SCGB1A1 | 1          |
| hsa-miR-6745  | NM_003357  | SCGB1A1 | 1          |
| hsa-miR-6751  | NM_003357  | SCGB1A1 | 1          |
| hsa-miR-6763  | NM_003357  | SCGB1A1 | 1          |
| hsa-miR-6765  | NM_003357  | SCGB1A1 | 1          |
| hsa-miR-6786  | NM_003357  | SCGB1A1 | 1          |
| hsa-miR-6813  | NM_003357  | SCGB1A1 | 1          |
| hsa-miR-6815  | NM_003357  | SCGB1A1 | 1          |
| hsa-miR-6831  | NM_003357  | SCGB1A1 | 1          |
| hsa-miR-6865  | NM_003357  | SCGB1A1 | 1          |
| hsa-miR-6870  | NM_003357  | SCGB1A1 | 1          |
| hsa-miR-7106  | NM_003357  | SCGB1A1 | 1          |
| hsa-miR-7110  | NM_003357  | SCGB1A1 | 1          |
| hsa-miR-4433  | NM_003357  | SCGB1A1 | 1          |
| hsa-miR-1273  | NM_003357  | SCGB1A1 | 1          |
| hsa-miR-7851  | NM_003357  | SCGB1A1 | 1          |
| hsa-miR-19b-  | NM_033012  | TNFSF11 | 0.96153846 |
| hsa-miR-133a  | NM_033012  | TNFSF11 | 0.96153846 |
| hsa-miR-202-  | NM_033012  | TNFSF11 | 0.96153846 |
| hsa-miR-4684  | NM_033012  | TNFSF11 | 0.96153846 |
| hsa-miR-6764  | NM_033012  | TNFSF11 | 0.96153846 |
| hsa-miR-202-  | XM_0170208 | TNFSF11 | 0.96153846 |
| hsa-miR-4278  | XM_0170208 | TNFSF11 | 0.96153846 |
| hsa-miR-1587  | XM_0170208 | TNFSF11 | 0.96153846 |
| hsa-miR-6785  | XM_0170208 | TNFSF11 | 0.96153846 |
| hsa-miR-6793  | XM_0170208 | TNFSF11 | 0.96153846 |
| hsa-miR-6873  | XM_0170208 | TNFSF11 | 0.96153846 |
| hsa-miR-18a-  | NM_003701  | TNFSF11 | 0.96153846 |
| hsa-miR-133a  | NM_003701  | TNFSF11 | 0.96153846 |
| hsa-miR-202-  | NM_003701  | TNFSF11 | 0.96153846 |
| hsa-miR-711   | NM_003701  | TNFSF11 | 0.96153846 |
| hsa-miR-4684  | NM_003701  | TNFSF11 | 0.96153846 |
| hsa-miR-6764  | NM_003701  | TNFSF11 | 0.96153846 |
| hsa-miR-655-  | NM_033012  | TNFSF11 | 0.97435897 |
| hsa-miR-1247  | NM_033012  | TNFSF11 | 0.97435897 |
| hsa-miR-8075  | NM_033012  | TNFSF11 | 0.97435897 |
| hsa-miR-502-  | XM_0170208 | TNFSF11 | 0.97435897 |
| hsa-miR-655-  | XM_0170208 | TNFSF11 | 0.97435897 |
| hsa-miR-8075  | XM_0170208 | TNFSF11 | 0.97435897 |
| hsa-miR-655-  | NM_003701  | TNFSF11 | 0.97435897 |
| hsa-miR-4766  | NM_003701  | TNFSF11 | 0.97435897 |
| hsa-miR-657   | NM_033012  | TNFSF11 | 0.98076923 |
| hsa-miR-1211  | NM_033012  | TNFSF11 | 0.98076923 |
| hsa-miR-657   | XM_0170208 | TNFSF11 | 0.98076923 |
| hsa-miR-4745  | XM_0170208 | TNFSF11 | 0.98076923 |
| hsa-miR-1211  | XM_0170208 | TNFSF11 | 0.98076923 |
| hsa-miR-7110  | NM_003701  | TNFSF11 | 0.98076923 |
| hsa-miR-1211  | NM_003701  | TNFSF11 | 0.98076923 |
| hsa-miR-6755  | NM_033012  | TNFSF11 | 0.98717949 |
| hsa-miR-6755  | NM_003701  | TNFSF11 | 0.98717949 |
| hsa-miR-19b-  | NM_033012  | TNFSF11 | 1          |
| hsa-miR-23a-  | NM_033012  | TNFSF11 | 1          |
| hsa-miR-93-3j | NM_033012  | TNFSF11 | 1          |
| hsa-miR-197-  | NM_033012  | TNFSF11 | 1          |
| hsa-miR-199a  | NM_033012  | TNFSF11 | 1          |
| hsa-miR-34a-  | NM_033012  | TNFSF11 | 1          |
| hsa-miR-183-  | NM_033012  | TNFSF11 | 1          |
| hsa-miR-199b  | NM_033012  | TNFSF11 | 1          |
| hsa-miR-205-  | NM_033012  | TNFSF11 | 1          |
| hsa-miR-212-  | NM_033012  | TNFSF11 | 1          |
| hsa-miR-216a  | NM_033012  | TNFSF11 | 1          |
| hsa-let-7g-3p | NM_033012  | TNFSF11 | 1          |
| hsa-miR-23b-  | NM_033012  | TNFSF11 | 1          |
| hsa-miR-27b-  | NM_033012  | TNFSF11 | 1          |
| hsa-miR-124-  | NM_033012  | TNFSF11 | 1          |
| hsa-miR-128-  | NM_033012  | TNFSF11 | 1          |
| hsa-miR-149-  | NM_033012  | TNFSF11 | 1          |
| hsa-miR-150-  | NM_033012  | TNFSF11 | 1          |
| hsa-miR-188-  | NM_033012  | TNFSF11 | 1          |
| hsa-miR-128-  | NM_033012  | TNFSF11 | 1          |
| hsa-miR-29c-  | NM_033012  | TNFSF11 | 1          |
| hsa-miR-34b-  | NM_033012  | TNFSF11 | 1          |
| hsa-miR-99b-  | NM_033012  | TNFSF11 | 1          |
| hsa-miR-99b-  | NM_033012  | TNFSF11 | 1          |
| hsa-miR-375-  | NM_033012  | TNFSF11 | 1          |

|                        |         |   |
|------------------------|---------|---|
| hsa-miR-377- NM_033012 | TNFSF11 | 1 |
| hsa-miR-328- NM_033012 | TNFSF11 | 1 |
| hsa-miR-324- NM_033012 | TNFSF11 | 1 |
| hsa-miR-325 NM_033012  | TNFSF11 | 1 |
| hsa-miR-346 NM_033012  | TNFSF11 | 1 |
| hsa-miR-424- NM_033012 | TNFSF11 | 1 |
| hsa-miR-18b- NM_033012 | TNFSF11 | 1 |
| hsa-miR-431- NM_033012 | TNFSF11 | 1 |
| hsa-miR-409- NM_033012 | TNFSF11 | 1 |
| hsa-miR-487a NM_033012 | TNFSF11 | 1 |
| hsa-miR-146b NM_033012 | TNFSF11 | 1 |
| hsa-miR-432- NM_033012 | TNFSF11 | 1 |
| hsa-miR-193b NM_033012 | TNFSF11 | 1 |
| hsa-miR-520b NM_033012 | TNFSF11 | 1 |
| hsa-miR-518a NM_033012 | TNFSF11 | 1 |
| hsa-miR-527 NM_033012  | TNFSF11 | 1 |
| hsa-miR-519a NM_033012 | TNFSF11 | 1 |
| hsa-miR-500a NM_033012 | TNFSF11 | 1 |
| hsa-miR-500a NM_033012 | TNFSF11 | 1 |
| hsa-miR-505- NM_033012 | TNFSF11 | 1 |
| hsa-miR-487b NM_033012 | TNFSF11 | 1 |
| hsa-miR-557 NM_033012  | TNFSF11 | 1 |
| hsa-miR-595 NM_033012  | TNFSF11 | 1 |
| hsa-miR-595 NM_033012  | TNFSF11 | 1 |
| hsa-miR-595 NM_033012  | TNFSF11 | 1 |
| hsa-miR-605- NM_033012 | TNFSF11 | 1 |
| hsa-miR-628- NM_033012 | TNFSF11 | 1 |
| hsa-miR-663a NM_033012 | TNFSF11 | 1 |
| hsa-miR-658 NM_033012  | TNFSF11 | 1 |
| hsa-miR-1264 NM_033012 | TNFSF11 | 1 |
| hsa-miR-550a NM_033012 | TNFSF11 | 1 |
| hsa-miR-767- NM_033012 | TNFSF11 | 1 |
| hsa-miR-449c NM_033012 | TNFSF11 | 1 |
| hsa-miR-890 NM_033012  | TNFSF11 | 1 |
| hsa-miR-877- NM_033012 | TNFSF11 | 1 |
| hsa-miR-933 NM_033012  | TNFSF11 | 1 |
| hsa-miR-938 NM_033012  | TNFSF11 | 1 |
| hsa-miR-942- NM_033012 | TNFSF11 | 1 |
| hsa-miR-942- NM_033012 | TNFSF11 | 1 |
| hsa-miR-1178 NM_033012 | TNFSF11 | 1 |
| hsa-miR-1227 NM_033012 | TNFSF11 | 1 |
| hsa-miR-1237 NM_033012 | TNFSF11 | 1 |
| hsa-miR-1207 NM_033012 | TNFSF11 | 1 |
| hsa-miR-1250 NM_033012 | TNFSF11 | 1 |
| hsa-miR-548n NM_033012 | TNFSF11 | 1 |
| hsa-miR-1470 NM_033012 | TNFSF11 | 1 |
| hsa-miR-1976 NM_033012 | TNFSF11 | 1 |
| hsa-miR-2276 NM_033012 | TNFSF11 | 1 |
| hsa-miR-2861 NM_033012 | TNFSF11 | 1 |
| hsa-miR-548s NM_033012 | TNFSF11 | 1 |
| hsa-miR-3127 NM_033012 | TNFSF11 | 1 |
| hsa-miR-3127 NM_033012 | TNFSF11 | 1 |
| hsa-miR-3130 NM_033012 | TNFSF11 | 1 |
| hsa-miR-3158 NM_033012 | TNFSF11 | 1 |
| hsa-miR-3187 NM_033012 | TNFSF11 | 1 |
| hsa-miR-3187 NM_033012 | TNFSF11 | 1 |
| hsa-miR-3192 NM_033012 | TNFSF11 | 1 |
| hsa-miR-3192 NM_033012 | TNFSF11 | 1 |
| hsa-miR-3194 NM_033012 | TNFSF11 | 1 |
| hsa-miR-4304 NM_033012 | TNFSF11 | 1 |
| hsa-miR-4317 NM_033012 | TNFSF11 | 1 |
| hsa-miR-4268 NM_033012 | TNFSF11 | 1 |
| hsa-miR-4278 NM_033012 | TNFSF11 | 1 |
| hsa-miR-3616 NM_033012 | TNFSF11 | 1 |
| hsa-miR-3659 NM_033012 | TNFSF11 | 1 |
| hsa-miR-3677 NM_033012 | TNFSF11 | 1 |
| hsa-miR-3690 NM_033012 | TNFSF11 | 1 |
| hsa-miR-3916 NM_033012 | TNFSF11 | 1 |
| hsa-miR-4418 NM_033012 | TNFSF11 | 1 |
| hsa-miR-4448 NM_033012 | TNFSF11 | 1 |
| hsa-miR-4456 NM_033012 | TNFSF11 | 1 |
| hsa-miR-4484 NM_033012 | TNFSF11 | 1 |
| hsa-miR-548a NM_033012 | TNFSF11 | 1 |
| hsa-miR-4498 NM_033012 | TNFSF11 | 1 |
| hsa-miR-4522 NM_033012 | TNFSF11 | 1 |
| hsa-miR-548a NM_033012 | TNFSF11 | 1 |
| hsa-miR-4633 NM_033012 | TNFSF11 | 1 |
| hsa-miR-4638 NM_033012 | TNFSF11 | 1 |
| hsa-miR-4640 NM_033012 | TNFSF11 | 1 |
| hsa-miR-4642 NM_033012 | TNFSF11 | 1 |
| hsa-miR-4643 NM_033012 | TNFSF11 | 1 |
| hsa-miR-4649 NM_033012 | TNFSF11 | 1 |
| hsa-miR-4654 NM_033012 | TNFSF11 | 1 |
| hsa-miR-4655 NM_033012 | TNFSF11 | 1 |
| hsa-miR-4659 NM_033012 | TNFSF11 | 1 |
| hsa-miR-4659 NM_033012 | TNFSF11 | 1 |
| hsa-miR-4664 NM_033012 | TNFSF11 | 1 |
| hsa-miR-4667 NM_033012 | TNFSF11 | 1 |
| hsa-miR-4675 NM_033012 | TNFSF11 | 1 |
| hsa-miR-4676 NM_033012 | TNFSF11 | 1 |
| hsa-miR-4685 NM_033012 | TNFSF11 | 1 |
| hsa-miR-4701 NM_033012 | TNFSF11 | 1 |
| hsa-miR-203b NM_033012 | TNFSF11 | 1 |
| hsa-miR-4722 NM_033012 | TNFSF11 | 1 |





|               |            |         |   |
|---------------|------------|---------|---|
| hsa-miR-7109  | NM_033012  | TNFSF11 | 1 |
| hsa-miR-7110  | NM_033012  | TNFSF11 | 1 |
| hsa-miR-7113  | NM_033012  | TNFSF11 | 1 |
| hsa-miR-7114  | NM_033012  | TNFSF11 | 1 |
| hsa-miR-7151  | NM_033012  | TNFSF11 | 1 |
| hsa-miR-7702  | NM_033012  | TNFSF11 | 1 |
| hsa-miR-7706  | NM_033012  | TNFSF11 | 1 |
| hsa-miR-1273  | NM_033012  | TNFSF11 | 1 |
| hsa-miR-8083  | NM_033012  | TNFSF11 | 1 |
| hsa-miR-9903  | NM_033012  | TNFSF11 | 1 |
| hsa-miR-1039  | NM_033012  | TNFSF11 | 1 |
| hsa-miR-1039  | NM_033012  | TNFSF11 | 1 |
| hsa-miR-1039  | NM_033012  | TNFSF11 | 1 |
| hsa-miR-1052  | NM_033012  | TNFSF11 | 1 |
| hsa-miR-3059  | NM_033012  | TNFSF11 | 1 |
| hsa-miR-1211  | NM_033012  | TNFSF11 | 1 |
| hsa-miR-1212  | NM_033012  | TNFSF11 | 1 |
| hsa-miR-19b-  | XM_0170208 | TNFSF11 | 1 |
| hsa-miR-23a-  | XM_0170208 | TNFSF11 | 1 |
| hsa-miR-26a-  | XM_0170208 | TNFSF11 | 1 |
| hsa-miR-29b-  | XM_0170208 | TNFSF11 | 1 |
| hsa-miR-29b-  | XM_0170208 | TNFSF11 | 1 |
| hsa-miR-197-  | XM_0170208 | TNFSF11 | 1 |
| hsa-miR-199a  | XM_0170208 | TNFSF11 | 1 |
| hsa-miR-199b  | XM_0170208 | TNFSF11 | 1 |
| hsa-miR-205-  | XM_0170208 | TNFSF11 | 1 |
| hsa-miR-210-  | XM_0170208 | TNFSF11 | 1 |
| hsa-miR-216a  | XM_0170208 | TNFSF11 | 1 |
| hsa-let-7g-3p | XM_0170208 | TNFSF11 | 1 |
| hsa-miR-23b-  | XM_0170208 | TNFSF11 | 1 |
| hsa-miR-27b-  | XM_0170208 | TNFSF11 | 1 |
| hsa-miR-125b  | XM_0170208 | TNFSF11 | 1 |
| hsa-miR-128-  | XM_0170208 | TNFSF11 | 1 |
| hsa-miR-150-  | XM_0170208 | TNFSF11 | 1 |
| hsa-miR-188-  | XM_0170208 | TNFSF11 | 1 |
| hsa-miR-188-  | XM_0170208 | TNFSF11 | 1 |
| hsa-miR-128-  | XM_0170208 | TNFSF11 | 1 |
| hsa-miR-106b  | XM_0170208 | TNFSF11 | 1 |
| hsa-miR-29c-  | XM_0170208 | TNFSF11 | 1 |
| hsa-miR-34b-  | XM_0170208 | TNFSF11 | 1 |
| hsa-miR-377-  | XM_0170208 | TNFSF11 | 1 |
| hsa-miR-330-  | XM_0170208 | TNFSF11 | 1 |
| hsa-miR-328-  | XM_0170208 | TNFSF11 | 1 |
| hsa-miR-331-  | XM_0170208 | TNFSF11 | 1 |
| hsa-miR-324-  | XM_0170208 | TNFSF11 | 1 |
| hsa-miR-346   | XM_0170208 | TNFSF11 | 1 |
| hsa-miR-196b  | XM_0170208 | TNFSF11 | 1 |
| hsa-miR-425-  | XM_0170208 | TNFSF11 | 1 |
| hsa-miR-431-  | XM_0170208 | TNFSF11 | 1 |
| hsa-miR-409-  | XM_0170208 | TNFSF11 | 1 |
| hsa-miR-146b  | XM_0170208 | TNFSF11 | 1 |
| hsa-miR-432-  | XM_0170208 | TNFSF11 | 1 |
| hsa-miR-193b  | XM_0170208 | TNFSF11 | 1 |
| hsa-miR-525-  | XM_0170208 | TNFSF11 | 1 |
| hsa-miR-520b  | XM_0170208 | TNFSF11 | 1 |
| hsa-miR-519a  | XM_0170208 | TNFSF11 | 1 |
| hsa-miR-487b  | XM_0170208 | TNFSF11 | 1 |
| hsa-miR-487b  | XM_0170208 | TNFSF11 | 1 |
| hsa-miR-557   | XM_0170208 | TNFSF11 | 1 |
| hsa-miR-564   | XM_0170208 | TNFSF11 | 1 |
| hsa-miR-572   | XM_0170208 | TNFSF11 | 1 |
| hsa-miR-595   | XM_0170208 | TNFSF11 | 1 |
| hsa-miR-635   | XM_0170208 | TNFSF11 | 1 |
| hsa-miR-642a  | XM_0170208 | TNFSF11 | 1 |
| hsa-miR-663a  | XM_0170208 | TNFSF11 | 1 |
| hsa-miR-449b  | XM_0170208 | TNFSF11 | 1 |
| hsa-miR-767-  | XM_0170208 | TNFSF11 | 1 |
| hsa-miR-449c  | XM_0170208 | TNFSF11 | 1 |
| hsa-miR-759   | XM_0170208 | TNFSF11 | 1 |
| hsa-miR-933   | XM_0170208 | TNFSF11 | 1 |
| hsa-miR-938   | XM_0170208 | TNFSF11 | 1 |
| hsa-miR-942-  | XM_0170208 | TNFSF11 | 1 |
| hsa-miR-1178  | XM_0170208 | TNFSF11 | 1 |
| hsa-miR-1180  | XM_0170208 | TNFSF11 | 1 |
| hsa-miR-1226  | XM_0170208 | TNFSF11 | 1 |
| hsa-miR-1227  | XM_0170208 | TNFSF11 | 1 |
| hsa-miR-1228  | XM_0170208 | TNFSF11 | 1 |
| hsa-miR-1237  | XM_0170208 | TNFSF11 | 1 |
| hsa-miR-1203  | XM_0170208 | TNFSF11 | 1 |
| hsa-miR-1207  | XM_0170208 | TNFSF11 | 1 |
| hsa-miR-1287  | XM_0170208 | TNFSF11 | 1 |
| hsa-miR-1287  | XM_0170208 | TNFSF11 | 1 |
| hsa-miR-1304  | XM_0170208 | TNFSF11 | 1 |
| hsa-miR-1250  | XM_0170208 | TNFSF11 | 1 |
| hsa-miR-1471  | XM_0170208 | TNFSF11 | 1 |
| hsa-miR-103b  | XM_0170208 | TNFSF11 | 1 |
| hsa-miR-1909  | XM_0170208 | TNFSF11 | 1 |
| hsa-miR-1976  | XM_0170208 | TNFSF11 | 1 |
| hsa-miR-2276  | XM_0170208 | TNFSF11 | 1 |
| hsa-miR-2909  | XM_0170208 | TNFSF11 | 1 |
| hsa-miR-548s  | XM_0170208 | TNFSF11 | 1 |
| hsa-miR-3127  | XM_0170208 | TNFSF11 | 1 |
| hsa-miR-3130  | XM_0170208 | TNFSF11 | 1 |
| hsa-miR-3161  | XM_0170208 | TNFSF11 | 1 |



|                                 |   |
|---------------------------------|---|
| hsa-miR-679C XM_0170208 TNFSF11 | 1 |
| hsa-miR-6791 XM_0170208 TNFSF11 | 1 |
| hsa-miR-6793 XM_0170208 TNFSF11 | 1 |
| hsa-miR-6793 XM_0170208 TNFSF11 | 1 |
| hsa-miR-680C XM_0170208 TNFSF11 | 1 |
| hsa-miR-6802 XM_0170208 TNFSF11 | 1 |
| hsa-miR-6806 XM_0170208 TNFSF11 | 1 |
| hsa-miR-6811 XM_0170208 TNFSF11 | 1 |
| hsa-miR-6814 XM_0170208 TNFSF11 | 1 |
| hsa-miR-6821 XM_0170208 TNFSF11 | 1 |
| hsa-miR-6822 XM_0170208 TNFSF11 | 1 |
| hsa-miR-6824 XM_0170208 TNFSF11 | 1 |
| hsa-miR-6824 XM_0170208 TNFSF11 | 1 |
| hsa-miR-6826 XM_0170208 TNFSF11 | 1 |
| hsa-miR-6827 XM_0170208 TNFSF11 | 1 |
| hsa-miR-6829 XM_0170208 TNFSF11 | 1 |
| hsa-miR-6831 XM_0170208 TNFSF11 | 1 |
| hsa-miR-6833 XM_0170208 TNFSF11 | 1 |
| hsa-miR-6842 XM_0170208 TNFSF11 | 1 |
| hsa-miR-6842 XM_0170208 TNFSF11 | 1 |
| hsa-miR-6845 XM_0170208 TNFSF11 | 1 |
| hsa-miR-6845 XM_0170208 TNFSF11 | 1 |
| hsa-miR-6845 XM_0170208 TNFSF11 | 1 |
| hsa-miR-6846 XM_0170208 TNFSF11 | 1 |
| hsa-miR-6846 XM_0170208 TNFSF11 | 1 |
| hsa-miR-6847 XM_0170208 TNFSF11 | 1 |
| hsa-miR-6851 XM_0170208 TNFSF11 | 1 |
| hsa-miR-6857 XM_0170208 TNFSF11 | 1 |
| hsa-miR-6864 XM_0170208 TNFSF11 | 1 |
| hsa-miR-6871 XM_0170208 TNFSF11 | 1 |
| hsa-miR-6877 XM_0170208 TNFSF11 | 1 |
| hsa-miR-6879 XM_0170208 TNFSF11 | 1 |
| hsa-miR-6887 XM_0170208 TNFSF11 | 1 |
| hsa-miR-6891 XM_0170208 TNFSF11 | 1 |
| hsa-miR-6892 XM_0170208 TNFSF11 | 1 |
| hsa-miR-7109 XM_0170208 TNFSF11 | 1 |
| hsa-miR-711C XM_0170208 TNFSF11 | 1 |
| hsa-miR-7113 XM_0170208 TNFSF11 | 1 |
| hsa-miR-7114 XM_0170208 TNFSF11 | 1 |
| hsa-miR-7161 XM_0170208 TNFSF11 | 1 |
| hsa-miR-8073 XM_0170208 TNFSF11 | 1 |
| hsa-miR-9901 XM_0170208 TNFSF11 | 1 |
| hsa-miR-9903 XM_0170208 TNFSF11 | 1 |
| hsa-miR-1039 XM_0170208 TNFSF11 | 1 |
| hsa-miR-1039 XM_0170208 TNFSF11 | 1 |
| hsa-miR-1118 XM_0170208 TNFSF11 | 1 |
| hsa-miR-3059 XM_0170208 TNFSF11 | 1 |
| hsa-miR-3059 XM_0170208 TNFSF11 | 1 |
| hsa-miR-3085 XM_0170208 TNFSF11 | 1 |
| hsa-miR-1212 XM_0170208 TNFSF11 | 1 |
| hsa-miR-19b- NM_003701 TNFSF11  | 1 |
| hsa-miR-23a- NM_003701 TNFSF11  | 1 |
| hsa-miR-27a- NM_003701 TNFSF11  | 1 |
| hsa-miR-93-3j NM_003701 TNFSF11 | 1 |
| hsa-miR-197- NM_003701 TNFSF11  | 1 |
| hsa-miR-199a NM_003701 TNFSF11  | 1 |
| hsa-miR-34a- NM_003701 TNFSF11  | 1 |
| hsa-miR-183- NM_003701 TNFSF11  | 1 |
| hsa-miR-199b NM_003701 TNFSF11  | 1 |
| hsa-miR-205- NM_003701 TNFSF11  | 1 |
| hsa-miR-210- NM_003701 TNFSF11  | 1 |
| hsa-miR-216a NM_003701 TNFSF11  | 1 |
| hsa-let-7g-3p NM_003701 TNFSF11 | 1 |
| hsa-miR-23b- NM_003701 TNFSF11  | 1 |
| hsa-miR-27b- NM_003701 TNFSF11  | 1 |
| hsa-miR-124- NM_003701 TNFSF11  | 1 |
| hsa-miR-150- NM_003701 TNFSF11  | 1 |
| hsa-miR-188- NM_003701 TNFSF11  | 1 |
| hsa-miR-128- NM_003701 TNFSF11  | 1 |
| hsa-miR-29c- NM_003701 TNFSF11  | 1 |
| hsa-miR-34b- NM_003701 TNFSF11  | 1 |
| hsa-miR-99b- NM_003701 TNFSF11  | 1 |
| hsa-miR-99b- NM_003701 TNFSF11  | 1 |
| hsa-miR-375- NM_003701 TNFSF11  | 1 |
| hsa-miR-324- NM_003701 TNFSF11  | 1 |
| hsa-miR-325 NM_003701 TNFSF11   | 1 |
| hsa-miR-424- NM_003701 TNFSF11  | 1 |
| hsa-miR-487a NM_003701 TNFSF11  | 1 |
| hsa-miR-146b NM_003701 TNFSF11  | 1 |
| hsa-miR-432- NM_003701 TNFSF11  | 1 |
| hsa-miR-520b NM_003701 TNFSF11  | 1 |
| hsa-miR-518a NM_003701 TNFSF11  | 1 |
| hsa-miR-527 NM_003701 TNFSF11   | 1 |
| hsa-miR-519a NM_003701 TNFSF11  | 1 |
| hsa-miR-500a NM_003701 TNFSF11  | 1 |
| hsa-miR-500a NM_003701 TNFSF11  | 1 |
| hsa-miR-505- NM_003701 TNFSF11  | 1 |
| hsa-miR-532- NM_003701 TNFSF11  | 1 |
| hsa-miR-487b NM_003701 TNFSF11  | 1 |
| hsa-miR-557 NM_003701 TNFSF11   | 1 |
| hsa-miR-595 NM_003701 TNFSF11   | 1 |
| hsa-miR-595 NM_003701 TNFSF11   | 1 |
| hsa-miR-595 NM_003701 TNFSF11   | 1 |
| hsa-miR-605- NM_003701 TNFSF11  | 1 |

|              |           |         |   |
|--------------|-----------|---------|---|
| hsa-miR-628- | NM_003701 | TNFSF11 | 1 |
| hsa-miR-657  | NM_003701 | TNFSF11 | 1 |
| hsa-miR-1264 | NM_003701 | TNFSF11 | 1 |
| hsa-miR-767- | NM_003701 | TNFSF11 | 1 |
| hsa-miR-449c | NM_003701 | TNFSF11 | 1 |
| hsa-miR-890  | NM_003701 | TNFSF11 | 1 |
| hsa-miR-933  | NM_003701 | TNFSF11 | 1 |
| hsa-miR-938  | NM_003701 | TNFSF11 | 1 |
| hsa-miR-942- | NM_003701 | TNFSF11 | 1 |
| hsa-miR-1178 | NM_003701 | TNFSF11 | 1 |
| hsa-miR-1207 | NM_003701 | TNFSF11 | 1 |
| hsa-miR-548n | NM_003701 | TNFSF11 | 1 |
| hsa-miR-147C | NM_003701 | TNFSF11 | 1 |
| hsa-miR-1976 | NM_003701 | TNFSF11 | 1 |
| hsa-miR-2276 | NM_003701 | TNFSF11 | 1 |
| hsa-miR-548s | NM_003701 | TNFSF11 | 1 |
| hsa-miR-3186 | NM_003701 | TNFSF11 | 1 |
| hsa-miR-319C | NM_003701 | TNFSF11 | 1 |
| hsa-miR-3192 | NM_003701 | TNFSF11 | 1 |
| hsa-miR-3192 | NM_003701 | TNFSF11 | 1 |
| hsa-miR-3194 | NM_003701 | TNFSF11 | 1 |
| hsa-miR-4317 | NM_003701 | TNFSF11 | 1 |
| hsa-miR-3616 | NM_003701 | TNFSF11 | 1 |
| hsa-miR-3659 | NM_003701 | TNFSF11 | 1 |
| hsa-miR-3677 | NM_003701 | TNFSF11 | 1 |
| hsa-miR-4418 | NM_003701 | TNFSF11 | 1 |
| hsa-miR-4456 | NM_003701 | TNFSF11 | 1 |
| hsa-miR-548a | NM_003701 | TNFSF11 | 1 |
| hsa-miR-4522 | NM_003701 | TNFSF11 | 1 |
| hsa-miR-548a | NM_003701 | TNFSF11 | 1 |
| hsa-miR-4633 | NM_003701 | TNFSF11 | 1 |
| hsa-miR-4643 | NM_003701 | TNFSF11 | 1 |
| hsa-miR-4655 | NM_003701 | TNFSF11 | 1 |
| hsa-miR-4655 | NM_003701 | TNFSF11 | 1 |
| hsa-miR-4655 | NM_003701 | TNFSF11 | 1 |
| hsa-miR-4667 | NM_003701 | TNFSF11 | 1 |
| hsa-miR-4675 | NM_003701 | TNFSF11 | 1 |
| hsa-miR-4676 | NM_003701 | TNFSF11 | 1 |
| hsa-miR-4701 | NM_003701 | TNFSF11 | 1 |
| hsa-miR-203b | NM_003701 | TNFSF11 | 1 |
| hsa-miR-473C | NM_003701 | TNFSF11 | 1 |
| hsa-miR-4733 | NM_003701 | TNFSF11 | 1 |
| hsa-miR-4737 | NM_003701 | TNFSF11 | 1 |
| hsa-miR-4738 | NM_003701 | TNFSF11 | 1 |
| hsa-miR-474C | NM_003701 | TNFSF11 | 1 |
| hsa-miR-4764 | NM_003701 | TNFSF11 | 1 |
| hsa-miR-4776 | NM_003701 | TNFSF11 | 1 |
| hsa-miR-4793 | NM_003701 | TNFSF11 | 1 |
| hsa-miR-500C | NM_003701 | TNFSF11 | 1 |
| hsa-miR-5189 | NM_003701 | TNFSF11 | 1 |
| hsa-miR-5191 | NM_003701 | TNFSF11 | 1 |
| hsa-miR-5196 | NM_003701 | TNFSF11 | 1 |
| hsa-miR-548a | NM_003701 | TNFSF11 | 1 |
| hsa-miR-5581 | NM_003701 | TNFSF11 | 1 |
| hsa-miR-5584 | NM_003701 | TNFSF11 | 1 |
| hsa-miR-5587 | NM_003701 | TNFSF11 | 1 |
| hsa-miR-5681 | NM_003701 | TNFSF11 | 1 |
| hsa-miR-5693 | NM_003701 | TNFSF11 | 1 |
| hsa-miR-6074 | NM_003701 | TNFSF11 | 1 |
| hsa-miR-6088 | NM_003701 | TNFSF11 | 1 |
| hsa-miR-650C | NM_003701 | TNFSF11 | 1 |
| hsa-miR-6503 | NM_003701 | TNFSF11 | 1 |
| hsa-miR-6512 | NM_003701 | TNFSF11 | 1 |
| hsa-miR-6515 | NM_003701 | TNFSF11 | 1 |
| hsa-miR-6717 | NM_003701 | TNFSF11 | 1 |
| hsa-miR-6511 | NM_003701 | TNFSF11 | 1 |
| hsa-miR-6736 | NM_003701 | TNFSF11 | 1 |
| hsa-miR-6736 | NM_003701 | TNFSF11 | 1 |
| hsa-miR-676C | NM_003701 | TNFSF11 | 1 |
| hsa-miR-6763 | NM_003701 | TNFSF11 | 1 |
| hsa-miR-6769 | NM_003701 | TNFSF11 | 1 |
| hsa-miR-677C | NM_003701 | TNFSF11 | 1 |
| hsa-miR-6774 | NM_003701 | TNFSF11 | 1 |
| hsa-miR-6782 | NM_003701 | TNFSF11 | 1 |
| hsa-miR-6793 | NM_003701 | TNFSF11 | 1 |
| hsa-miR-6801 | NM_003701 | TNFSF11 | 1 |
| hsa-miR-6811 | NM_003701 | TNFSF11 | 1 |
| hsa-miR-6814 | NM_003701 | TNFSF11 | 1 |
| hsa-miR-6818 | NM_003701 | TNFSF11 | 1 |
| hsa-miR-682C | NM_003701 | TNFSF11 | 1 |
| hsa-miR-6829 | NM_003701 | TNFSF11 | 1 |
| hsa-miR-6833 | NM_003701 | TNFSF11 | 1 |
| hsa-miR-6841 | NM_003701 | TNFSF11 | 1 |
| hsa-miR-6846 | NM_003701 | TNFSF11 | 1 |
| hsa-miR-6846 | NM_003701 | TNFSF11 | 1 |
| hsa-miR-6851 | NM_003701 | TNFSF11 | 1 |
| hsa-miR-6856 | NM_003701 | TNFSF11 | 1 |
| hsa-miR-6858 | NM_003701 | TNFSF11 | 1 |
| hsa-miR-6865 | NM_003701 | TNFSF11 | 1 |
| hsa-miR-6873 | NM_003701 | TNFSF11 | 1 |
| hsa-miR-6877 | NM_003701 | TNFSF11 | 1 |
| hsa-miR-6882 | NM_003701 | TNFSF11 | 1 |
| hsa-miR-6892 | NM_003701 | TNFSF11 | 1 |
| hsa-miR-7113 | NM_003701 | TNFSF11 | 1 |

|                          |         |            |
|--------------------------|---------|------------|
| hsa-miR-7114 NM_003701   | TNFSF11 | 1          |
| hsa-miR-7151 NM_003701   | TNFSF11 | 1          |
| hsa-miR-7702 NM_003701   | TNFSF11 | 1          |
| hsa-miR-8083 NM_003701   | TNFSF11 | 1          |
| hsa-miR-9903 NM_003701   | TNFSF11 | 1          |
| hsa-miR-1039 NM_003701   | TNFSF11 | 1          |
| hsa-miR-1052 NM_003701   | TNFSF11 | 1          |
| hsa-miR-1211 NM_003701   | TNFSF11 | 1          |
| hsa-miR-1212 NM_003701   | TNFSF11 | 1          |
| hsa-miR-3125 XM_0115120  | ADAM23  | 0.96153846 |
| hsa-miR-3188 XM_0115120  | ADAM23  | 0.96153846 |
| hsa-miR-3661 XM_0115120  | ADAM23  | 0.96153846 |
| hsa-miR-3675 XM_0115120  | ADAM23  | 0.96153846 |
| hsa-miR-3913 XM_0115120  | ADAM23  | 0.96153846 |
| hsa-miR-4732 XM_0115120  | ADAM23  | 0.96153846 |
| hsa-miR-1052 XM_0115120  | ADAM23  | 0.96153846 |
| hsa-miR-216t NM_003812   | ADAM23  | 0.96153846 |
| hsa-miR-1285 NM_003812   | ADAM23  | 0.96153846 |
| hsa-miR-1293 NM_003812   | ADAM23  | 0.96153846 |
| hsa-miR-1253 NM_003812   | ADAM23  | 0.96153846 |
| hsa-miR-3661 NM_003812   | ADAM23  | 0.96153846 |
| hsa-miR-3675 NM_003812   | ADAM23  | 0.96153846 |
| hsa-miR-3976 NM_003812   | ADAM23  | 0.96153846 |
| hsa-miR-4774 NM_003812   | ADAM23  | 0.96153846 |
| hsa-miR-6852 NM_003812   | ADAM23  | 0.96153846 |
| hsa-miR-6875 NM_003812   | ADAM23  | 0.96153846 |
| hsa-miR-4481 NM_003812   | ADAM23  | 0.96923077 |
| hsa-miR-7158 XM_0115120  | ADAM23  | 0.97435897 |
| hsa-miR-514t NM_003812   | ADAM23  | 0.97435897 |
| hsa-miR-3622 NM_003812   | ADAM23  | 0.97435897 |
| hsa-miR-499a XM_0115120  | ADAM23  | 0.98076923 |
| hsa-miR-874- XM_0115120  | ADAM23  | 0.98076923 |
| hsa-miR-4537 XM_0115120  | ADAM23  | 0.98076923 |
| hsa-miR-6794 XM_0115120  | ADAM23  | 0.98076923 |
| hsa-miR-4537 NM_003812   | ADAM23  | 0.98076923 |
| hsa-miR-6794 NM_003812   | ADAM23  | 0.98076923 |
| hsa-miR-2682 XM_0115120  | ADAM23  | 0.99145299 |
| hsa-let-7c-5p XM_0115120 | ADAM23  | 1          |
| hsa-let-7e-5p XM_0115120 | ADAM23  | 1          |
| hsa-miR-18a- XM_0115120  | ADAM23  | 1          |
| hsa-miR-24-3j XM_0115120 | ADAM23  | 1          |
| hsa-miR-24-2 XM_0115120  | ADAM23  | 1          |
| hsa-miR-26a- XM_0115120  | ADAM23  | 1          |
| hsa-miR-96-5j XM_0115120 | ADAM23  | 1          |
| hsa-miR-198 XM_0115120   | ADAM23  | 1          |
| hsa-miR-199a XM_0115120  | ADAM23  | 1          |
| hsa-miR-129- XM_0115120  | ADAM23  | 1          |
| hsa-miR-129- XM_0115120  | ADAM23  | 1          |
| hsa-miR-30c- XM_0115120  | ADAM23  | 1          |
| hsa-miR-182- XM_0115120  | ADAM23  | 1          |
| hsa-miR-210- XM_0115120  | ADAM23  | 1          |
| hsa-miR-214- XM_0115120  | ADAM23  | 1          |
| hsa-miR-215- XM_0115120  | ADAM23  | 1          |
| hsa-miR-216a XM_0115120  | ADAM23  | 1          |
| hsa-miR-30b- XM_0115120  | ADAM23  | 1          |
| hsa-miR-125t XM_0115120  | ADAM23  | 1          |
| hsa-miR-135a XM_0115120  | ADAM23  | 1          |
| hsa-miR-125a XM_0115120  | ADAM23  | 1          |
| hsa-miR-127- XM_0115120  | ADAM23  | 1          |
| hsa-miR-129- XM_0115120  | ADAM23  | 1          |
| hsa-miR-129- XM_0115120  | ADAM23  | 1          |
| hsa-miR-184 XM_0115120   | ADAM23  | 1          |
| hsa-miR-206 XM_0115120   | ADAM23  | 1          |
| hsa-miR-200c XM_0115120  | ADAM23  | 1          |
| hsa-miR-181t XM_0115120  | ADAM23  | 1          |
| hsa-miR-194- XM_0115120  | ADAM23  | 1          |
| hsa-miR-99b- XM_0115120  | ADAM23  | 1          |
| hsa-miR-130t XM_0115120  | ADAM23  | 1          |
| hsa-miR-365a XM_0115120  | ADAM23  | 1          |
| hsa-miR-379- XM_0115120  | ADAM23  | 1          |
| hsa-miR-381- XM_0115120  | ADAM23  | 1          |
| hsa-miR-330- XM_0115120  | ADAM23  | 1          |
| hsa-miR-342- XM_0115120  | ADAM23  | 1          |
| hsa-miR-151a XM_0115120  | ADAM23  | 1          |
| hsa-miR-133t XM_0115120  | ADAM23  | 1          |
| hsa-miR-196t XM_0115120  | ADAM23  | 1          |
| hsa-miR-423- XM_0115120  | ADAM23  | 1          |
| hsa-miR-451a XM_0115120  | ADAM23  | 1          |
| hsa-miR-409- XM_0115120  | ADAM23  | 1          |
| hsa-miR-484 XM_0115120   | ADAM23  | 1          |
| hsa-miR-486- XM_0115120  | ADAM23  | 1          |
| hsa-miR-488- XM_0115120  | ADAM23  | 1          |
| hsa-miR-490- XM_0115120  | ADAM23  | 1          |
| hsa-miR-490- XM_0115120  | ADAM23  | 1          |
| hsa-miR-490- XM_0115120  | ADAM23  | 1          |
| hsa-miR-492 XM_0115120   | ADAM23  | 1          |
| hsa-miR-493- XM_0115120  | ADAM23  | 1          |
| hsa-miR-432- XM_0115120  | ADAM23  | 1          |
| hsa-miR-193t XM_0115120  | ADAM23  | 1          |
| hsa-miR-512- XM_0115120  | ADAM23  | 1          |
| hsa-miR-498- XM_0115120  | ADAM23  | 1          |
| hsa-miR-519e XM_0115120  | ADAM23  | 1          |
| hsa-miR-519c XM_0115120  | ADAM23  | 1          |
| hsa-miR-519c XM_0115120  | ADAM23  | 1          |

|                                |   |
|--------------------------------|---|
| hsa-miR-519t XM_0115120 ADAM23 | 1 |
| hsa-miR-519t XM_0115120 ADAM23 | 1 |
| hsa-miR-523- XM_0115120 ADAM23 | 1 |
| hsa-miR-523- XM_0115120 ADAM23 | 1 |
| hsa-miR-518f XM_0115120 ADAM23 | 1 |
| hsa-miR-518c XM_0115120 ADAM23 | 1 |
| hsa-miR-517- XM_0115120 ADAM23 | 1 |
| hsa-miR-518e XM_0115120 ADAM23 | 1 |
| hsa-miR-518e XM_0115120 ADAM23 | 1 |
| hsa-miR-520h XM_0115120 ADAM23 | 1 |
| hsa-miR-522- XM_0115120 ADAM23 | 1 |
| hsa-miR-522- XM_0115120 ADAM23 | 1 |
| hsa-miR-519a XM_0115120 ADAM23 | 1 |
| hsa-miR-519a XM_0115120 ADAM23 | 1 |
| hsa-miR-502- XM_0115120 ADAM23 | 1 |
| hsa-miR-504- XM_0115120 ADAM23 | 1 |
| hsa-miR-505- XM_0115120 ADAM23 | 1 |
| hsa-miR-505- XM_0115120 ADAM23 | 1 |
| hsa-miR-514a XM_0115120 ADAM23 | 1 |
| hsa-miR-514a XM_0115120 ADAM23 | 1 |
| hsa-miR-487b XM_0115120 ADAM23 | 1 |
| hsa-miR-551t XM_0115120 ADAM23 | 1 |
| hsa-miR-583 XM_0115120 ADAM23  | 1 |
| hsa-miR-595 XM_0115120 ADAM23  | 1 |
| hsa-miR-598- XM_0115120 ADAM23 | 1 |
| hsa-miR-603 XM_0115120 ADAM23  | 1 |
| hsa-miR-628- XM_0115120 ADAM23 | 1 |
| hsa-miR-628- XM_0115120 ADAM23 | 1 |
| hsa-miR-631 XM_0115120 ADAM23  | 1 |
| hsa-miR-634 XM_0115120 ADAM23  | 1 |
| hsa-miR-634 XM_0115120 ADAM23  | 1 |
| hsa-miR-662 XM_0115120 ADAM23  | 1 |
| hsa-miR-653- XM_0115120 ADAM23 | 1 |
| hsa-miR-549a XM_0115120 ADAM23 | 1 |
| hsa-miR-542- XM_0115120 ADAM23 | 1 |
| hsa-miR-542- XM_0115120 ADAM23 | 1 |
| hsa-miR-1264 XM_0115120 ADAM23 | 1 |
| hsa-miR-668- XM_0115120 ADAM23 | 1 |
| hsa-miR-550a XM_0115120 ADAM23 | 1 |
| hsa-miR-1296 XM_0115120 ADAM23 | 1 |
| hsa-miR-1468 XM_0115120 ADAM23 | 1 |
| hsa-miR-759 XM_0115120 ADAM23  | 1 |
| hsa-miR-765 XM_0115120 ADAM23  | 1 |
| hsa-miR-891a XM_0115120 ADAM23 | 1 |
| hsa-miR-875- XM_0115120 ADAM23 | 1 |
| hsa-miR-708- XM_0115120 ADAM23 | 1 |
| hsa-miR-877- XM_0115120 ADAM23 | 1 |
| hsa-miR-665 XM_0115120 ADAM23  | 1 |
| hsa-miR-921 XM_0115120 ADAM23  | 1 |
| hsa-miR-922 XM_0115120 ADAM23  | 1 |
| hsa-miR-935 XM_0115120 ADAM23  | 1 |
| hsa-miR-936 XM_0115120 ADAM23  | 1 |
| hsa-miR-937- XM_0115120 ADAM23 | 1 |
| hsa-miR-937- XM_0115120 ADAM23 | 1 |
| hsa-miR-297 XM_0115120 ADAM23  | 1 |
| hsa-miR-1182 XM_0115120 ADAM23 | 1 |
| hsa-miR-1183 XM_0115120 ADAM23 | 1 |
| hsa-miR-1237 XM_0115120 ADAM23 | 1 |
| hsa-miR-120c XM_0115120 ADAM23 | 1 |
| hsa-miR-1202 XM_0115120 ADAM23 | 1 |
| hsa-miR-1204 XM_0115120 ADAM23 | 1 |
| hsa-miR-1287 XM_0115120 ADAM23 | 1 |
| hsa-miR-1294 XM_0115120 ADAM23 | 1 |
| hsa-miR-1255 XM_0115120 ADAM23 | 1 |
| hsa-miR-127c XM_0115120 ADAM23 | 1 |
| hsa-miR-1281 XM_0115120 ADAM23 | 1 |
| hsa-miR-1255 XM_0115120 ADAM23 | 1 |
| hsa-miR-1255 XM_0115120 ADAM23 | 1 |
| hsa-miR-1539 XM_0115120 ADAM23 | 1 |
| hsa-miR-320d XM_0115120 ADAM23 | 1 |
| hsa-miR-191c XM_0115120 ADAM23 | 1 |
| hsa-miR-1913 XM_0115120 ADAM23 | 1 |
| hsa-miR-1976 XM_0115120 ADAM23 | 1 |
| hsa-miR-2276 XM_0115120 ADAM23 | 1 |
| hsa-miR-2861 XM_0115120 ADAM23 | 1 |
| hsa-miR-312c XM_0115120 ADAM23 | 1 |
| hsa-miR-3126 XM_0115120 ADAM23 | 1 |
| hsa-miR-3125 XM_0115120 ADAM23 | 1 |
| hsa-miR-3132 XM_0115120 ADAM23 | 1 |
| hsa-miR-544t XM_0115120 ADAM23 | 1 |
| hsa-miR-3135 XM_0115120 ADAM23 | 1 |
| hsa-miR-3144 XM_0115120 ADAM23 | 1 |
| hsa-miR-3154 XM_0115120 ADAM23 | 1 |
| hsa-miR-3156 XM_0115120 ADAM23 | 1 |
| hsa-miR-3156 XM_0115120 ADAM23 | 1 |
| hsa-miR-3157 XM_0115120 ADAM23 | 1 |
| hsa-miR-3158 XM_0115120 ADAM23 | 1 |
| hsa-miR-316c XM_0115120 ADAM23 | 1 |
| hsa-miR-317c XM_0115120 ADAM23 | 1 |
| hsa-miR-317c XM_0115120 ADAM23 | 1 |
| hsa-miR-3173 XM_0115120 ADAM23 | 1 |
| hsa-miR-323t XM_0115120 ADAM23 | 1 |
| hsa-miR-3175 XM_0115120 ADAM23 | 1 |
| hsa-miR-3175 XM_0115120 ADAM23 | 1 |







|                                |   |
|--------------------------------|---|
| hsa-miR-6892 XM_0115120 ADAM23 | 1 |
| hsa-miR-6892 XM_0115120 ADAM23 | 1 |
| hsa-miR-6894 XM_0115120 ADAM23 | 1 |
| hsa-miR-7106 XM_0115120 ADAM23 | 1 |
| hsa-miR-7105 XM_0115120 ADAM23 | 1 |
| hsa-miR-7110 XM_0115120 ADAM23 | 1 |
| hsa-miR-7110 XM_0115120 ADAM23 | 1 |
| hsa-miR-7110 XM_0115120 ADAM23 | 1 |
| hsa-miR-7114 XM_0115120 ADAM23 | 1 |
| hsa-miR-7150 XM_0115120 ADAM23 | 1 |
| hsa-miR-7152 XM_0115120 ADAM23 | 1 |
| hsa-miR-7157 XM_0115120 ADAM23 | 1 |
| hsa-miR-7156 XM_0115120 ADAM23 | 1 |
| hsa-miR-7159 XM_0115120 ADAM23 | 1 |
| hsa-miR-7702 XM_0115120 ADAM23 | 1 |
| hsa-miR-7843 XM_0115120 ADAM23 | 1 |
| hsa-miR-4433 XM_0115120 ADAM23 | 1 |
| hsa-miR-4433 XM_0115120 ADAM23 | 1 |
| hsa-miR-7854 XM_0115120 ADAM23 | 1 |
| hsa-miR-7856 XM_0115120 ADAM23 | 1 |
| hsa-miR-548t XM_0115120 ADAM23 | 1 |
| hsa-miR-7975 XM_0115120 ADAM23 | 1 |
| hsa-miR-8057 XM_0115120 ADAM23 | 1 |
| hsa-miR-8063 XM_0115120 ADAM23 | 1 |
| hsa-miR-8064 XM_0115120 ADAM23 | 1 |
| hsa-miR-8085 XM_0115120 ADAM23 | 1 |
| hsa-miR-8085 XM_0115120 ADAM23 | 1 |
| hsa-miR-8485 XM_0115120 ADAM23 | 1 |
| hsa-miR-9898 XM_0115120 ADAM23 | 1 |
| hsa-miR-9900 XM_0115120 ADAM23 | 1 |
| hsa-miR-9903 XM_0115120 ADAM23 | 1 |
| hsa-miR-9986 XM_0115120 ADAM23 | 1 |
| hsa-miR-1039 XM_0115120 ADAM23 | 1 |
| hsa-miR-1135 XM_0115120 ADAM23 | 1 |
| hsa-miR-6525 XM_0115120 ADAM23 | 1 |
| hsa-miR-1211 XM_0115120 ADAM23 | 1 |
| hsa-miR-1211 XM_0115120 ADAM23 | 1 |
| hsa-miR-1212 XM_0115120 ADAM23 | 1 |
| hsa-let-7c-5p NM_003812 ADAM23 | 1 |
| hsa-let-7e-5p NM_003812 ADAM23 | 1 |
| hsa-miR-17-5j NM_003812 ADAM23 | 1 |
| hsa-miR-18a- NM_003812 ADAM23  | 1 |
| hsa-miR-22-5j NM_003812 ADAM23 | 1 |
| hsa-miR-24-3j NM_003812 ADAM23 | 1 |
| hsa-miR-24-2- NM_003812 ADAM23 | 1 |
| hsa-miR-26a- NM_003812 ADAM23  | 1 |
| hsa-miR-96-5j NM_003812 ADAM23 | 1 |
| hsa-miR-198 NM_003812 ADAM23   | 1 |
| hsa-miR-129- NM_003812 ADAM23  | 1 |
| hsa-miR-30c-; NM_003812 ADAM23 | 1 |
| hsa-miR-30c-; NM_003812 ADAM23 | 1 |
| hsa-miR-182- NM_003812 ADAM23  | 1 |
| hsa-miR-204-; NM_003812 ADAM23 | 1 |
| hsa-miR-210-; NM_003812 ADAM23 | 1 |
| hsa-miR-214-; NM_003812 ADAM23 | 1 |
| hsa-miR-221-; NM_003812 ADAM23 | 1 |
| hsa-miR-222-; NM_003812 ADAM23 | 1 |
| hsa-miR-30b-; NM_003812 ADAM23 | 1 |
| hsa-miR-125t NM_003812 ADAM23  | 1 |
| hsa-miR-128- NM_003812 ADAM23  | 1 |
| hsa-miR-125a NM_003812 ADAM23  | 1 |
| hsa-miR-127-; NM_003812 ADAM23 | 1 |
| hsa-miR-127-; NM_003812 ADAM23 | 1 |
| hsa-miR-129-; NM_003812 ADAM23 | 1 |
| hsa-miR-134-; NM_003812 ADAM23 | 1 |
| hsa-miR-184 NM_003812 ADAM23   | 1 |
| hsa-miR-206 NM_003812 ADAM23   | 1 |
| hsa-miR-34b-; NM_003812 ADAM23 | 1 |
| hsa-miR-99b-; NM_003812 ADAM23 | 1 |
| hsa-miR-381-; NM_003812 ADAM23 | 1 |
| hsa-miR-151a NM_003812 ADAM23  | 1 |
| hsa-miR-151a NM_003812 ADAM23  | 1 |
| hsa-miR-133t NM_003812 ADAM23  | 1 |
| hsa-miR-196t NM_003812 ADAM23  | 1 |
| hsa-miR-20b-; NM_003812 ADAM23 | 1 |
| hsa-miR-451a NM_003812 ADAM23  | 1 |
| hsa-miR-409-; NM_003812 ADAM23 | 1 |
| hsa-miR-486-; NM_003812 ADAM23 | 1 |
| hsa-miR-488-; NM_003812 ADAM23 | 1 |
| hsa-miR-490-; NM_003812 ADAM23 | 1 |
| hsa-miR-146t NM_003812 ADAM23  | 1 |
| hsa-miR-492 NM_003812 ADAM23   | 1 |
| hsa-miR-493-; NM_003812 ADAM23 | 1 |
| hsa-miR-432-; NM_003812 ADAM23 | 1 |
| hsa-miR-193t NM_003812 ADAM23  | 1 |
| hsa-miR-181d NM_003812 ADAM23  | 1 |
| hsa-miR-512-; NM_003812 ADAM23 | 1 |
| hsa-miR-498-; NM_003812 ADAM23 | 1 |
| hsa-miR-519e NM_003812 ADAM23  | 1 |
| hsa-miR-519c NM_003812 ADAM23  | 1 |
| hsa-miR-526t NM_003812 ADAM23  | 1 |
| hsa-miR-519t NM_003812 ADAM23  | 1 |
| hsa-miR-523-; NM_003812 ADAM23 | 1 |
| hsa-miR-518f NM_003812 ADAM23  | 1 |

|              |           |        |   |
|--------------|-----------|--------|---|
| hsa-miR-520c | NM_003812 | ADAM23 | 1 |
| hsa-miR-518c | NM_003812 | ADAM23 | 1 |
| hsa-miR-517- | NM_003812 | ADAM23 | 1 |
| hsa-miR-518e | NM_003812 | ADAM23 | 1 |
| hsa-miR-520h | NM_003812 | ADAM23 | 1 |
| hsa-miR-522- | NM_003812 | ADAM23 | 1 |
| hsa-miR-519a | NM_003812 | ADAM23 | 1 |
| hsa-miR-504- | NM_003812 | ADAM23 | 1 |
| hsa-miR-505- | NM_003812 | ADAM23 | 1 |
| hsa-miR-510- | NM_003812 | ADAM23 | 1 |
| hsa-miR-514a | NM_003812 | ADAM23 | 1 |
| hsa-miR-514a | NM_003812 | ADAM23 | 1 |
| hsa-miR-532- | NM_003812 | ADAM23 | 1 |
| hsa-miR-551t | NM_003812 | ADAM23 | 1 |
| hsa-miR-573  | NM_003812 | ADAM23 | 1 |
| hsa-miR-574- | NM_003812 | ADAM23 | 1 |
| hsa-miR-595  | NM_003812 | ADAM23 | 1 |
| hsa-miR-607  | NM_003812 | ADAM23 | 1 |
| hsa-miR-616- | NM_003812 | ADAM23 | 1 |
| hsa-miR-628- | NM_003812 | ADAM23 | 1 |
| hsa-miR-628- | NM_003812 | ADAM23 | 1 |
| hsa-miR-629- | NM_003812 | ADAM23 | 1 |
| hsa-miR-631  | NM_003812 | ADAM23 | 1 |
| hsa-miR-634  | NM_003812 | ADAM23 | 1 |
| hsa-miR-634  | NM_003812 | ADAM23 | 1 |
| hsa-miR-662  | NM_003812 | ADAM23 | 1 |
| hsa-miR-449t | NM_003812 | ADAM23 | 1 |
| hsa-miR-653- | NM_003812 | ADAM23 | 1 |
| hsa-miR-549a | NM_003812 | ADAM23 | 1 |
| hsa-miR-542- | NM_003812 | ADAM23 | 1 |
| hsa-miR-542- | NM_003812 | ADAM23 | 1 |
| hsa-miR-758- | NM_003812 | ADAM23 | 1 |
| hsa-miR-1264 | NM_003812 | ADAM23 | 1 |
| hsa-miR-668- | NM_003812 | ADAM23 | 1 |
| hsa-miR-320t | NM_003812 | ADAM23 | 1 |
| hsa-miR-1296 | NM_003812 | ADAM23 | 1 |
| hsa-miR-1468 | NM_003812 | ADAM23 | 1 |
| hsa-miR-1323 | NM_003812 | ADAM23 | 1 |
| hsa-miR-769- | NM_003812 | ADAM23 | 1 |
| hsa-miR-378d | NM_003812 | ADAM23 | 1 |
| hsa-miR-759  | NM_003812 | ADAM23 | 1 |
| hsa-miR-765  | NM_003812 | ADAM23 | 1 |
| hsa-miR-675- | NM_003812 | ADAM23 | 1 |
| hsa-miR-891a | NM_003812 | ADAM23 | 1 |
| hsa-miR-874- | NM_003812 | ADAM23 | 1 |
| hsa-miR-875- | NM_003812 | ADAM23 | 1 |
| hsa-miR-665  | NM_003812 | ADAM23 | 1 |
| hsa-miR-921  | NM_003812 | ADAM23 | 1 |
| hsa-miR-922  | NM_003812 | ADAM23 | 1 |
| hsa-miR-935  | NM_003812 | ADAM23 | 1 |
| hsa-miR-936  | NM_003812 | ADAM23 | 1 |
| hsa-miR-936  | NM_003812 | ADAM23 | 1 |
| hsa-miR-937- | NM_003812 | ADAM23 | 1 |
| hsa-miR-1182 | NM_003812 | ADAM23 | 1 |
| hsa-miR-1183 | NM_003812 | ADAM23 | 1 |
| hsa-miR-1233 | NM_003812 | ADAM23 | 1 |
| hsa-miR-1200 | NM_003812 | ADAM23 | 1 |
| hsa-miR-1204 | NM_003812 | ADAM23 | 1 |
| hsa-miR-1285 | NM_003812 | ADAM23 | 1 |
| hsa-miR-1294 | NM_003812 | ADAM23 | 1 |
| hsa-miR-1295 | NM_003812 | ADAM23 | 1 |
| hsa-miR-548l | NM_003812 | ADAM23 | 1 |
| hsa-miR-1302 | NM_003812 | ADAM23 | 1 |
| hsa-miR-1253 | NM_003812 | ADAM23 | 1 |
| hsa-miR-548g | NM_003812 | ADAM23 | 1 |
| hsa-miR-1270 | NM_003812 | ADAM23 | 1 |
| hsa-miR-1281 | NM_003812 | ADAM23 | 1 |
| hsa-miR-1282 | NM_003812 | ADAM23 | 1 |
| hsa-miR-1255 | NM_003812 | ADAM23 | 1 |
| hsa-miR-1255 | NM_003812 | ADAM23 | 1 |
| hsa-miR-1539 | NM_003812 | ADAM23 | 1 |
| hsa-miR-1539 | NM_003812 | ADAM23 | 1 |
| hsa-miR-1827 | NM_003812 | ADAM23 | 1 |
| hsa-miR-1910 | NM_003812 | ADAM23 | 1 |
| hsa-miR-1976 | NM_003812 | ADAM23 | 1 |
| hsa-miR-2276 | NM_003812 | ADAM23 | 1 |
| hsa-miR-2276 | NM_003812 | ADAM23 | 1 |
| hsa-miR-711  | NM_003812 | ADAM23 | 1 |
| hsa-miR-3120 | NM_003812 | ADAM23 | 1 |
| hsa-miR-3126 | NM_003812 | ADAM23 | 1 |
| hsa-miR-3127 | NM_003812 | ADAM23 | 1 |
| hsa-miR-3129 | NM_003812 | ADAM23 | 1 |
| hsa-miR-3132 | NM_003812 | ADAM23 | 1 |
| hsa-miR-544t | NM_003812 | ADAM23 | 1 |
| hsa-miR-3138 | NM_003812 | ADAM23 | 1 |
| hsa-miR-3139 | NM_003812 | ADAM23 | 1 |
| hsa-miR-3144 | NM_003812 | ADAM23 | 1 |
| hsa-miR-3154 | NM_003812 | ADAM23 | 1 |
| hsa-miR-3156 | NM_003812 | ADAM23 | 1 |
| hsa-miR-3156 | NM_003812 | ADAM23 | 1 |
| hsa-miR-3157 | NM_003812 | ADAM23 | 1 |
| hsa-miR-3158 | NM_003812 | ADAM23 | 1 |
| hsa-miR-3160 | NM_003812 | ADAM23 | 1 |
| hsa-miR-3167 | NM_003812 | ADAM23 | 1 |

|                        |        |   |
|------------------------|--------|---|
| hsa-miR-317C NM_003812 | ADAM23 | 1 |
| hsa-miR-3173 NM_003812 | ADAM23 | 1 |
| hsa-miR-323b NM_003812 | ADAM23 | 1 |
| hsa-miR-3175 NM_003812 | ADAM23 | 1 |
| hsa-miR-3175 NM_003812 | ADAM23 | 1 |
| hsa-miR-548v NM_003812 | ADAM23 | 1 |
| hsa-miR-3191 NM_003812 | ADAM23 | 1 |
| hsa-miR-3193 NM_003812 | ADAM23 | 1 |
| hsa-miR-548x NM_003812 | ADAM23 | 1 |
| hsa-miR-430C NM_003812 | ADAM23 | 1 |
| hsa-miR-4257 NM_003812 | ADAM23 | 1 |
| hsa-miR-4253 NM_003812 | ADAM23 | 1 |
| hsa-miR-4261 NM_003812 | ADAM23 | 1 |
| hsa-miR-4266 NM_003812 | ADAM23 | 1 |
| hsa-miR-2355 NM_003812 | ADAM23 | 1 |
| hsa-miR-4283 NM_003812 | ADAM23 | 1 |
| hsa-miR-3605 NM_003812 | ADAM23 | 1 |
| hsa-miR-3615 NM_003812 | ADAM23 | 1 |
| hsa-miR-3615 NM_003812 | ADAM23 | 1 |
| hsa-miR-23c NM_003812  | ADAM23 | 1 |
| hsa-miR-3622 NM_003812 | ADAM23 | 1 |
| hsa-miR-3622 NM_003812 | ADAM23 | 1 |
| hsa-miR-3645 NM_003812 | ADAM23 | 1 |
| hsa-miR-3664 NM_003812 | ADAM23 | 1 |
| hsa-miR-3666 NM_003812 | ADAM23 | 1 |
| hsa-miR-3675 NM_003812 | ADAM23 | 1 |
| hsa-miR-3691 NM_003812 | ADAM23 | 1 |
| hsa-miR-3691 NM_003812 | ADAM23 | 1 |
| hsa-miR-3692 NM_003812 | ADAM23 | 1 |
| hsa-miR-3913 NM_003812 | ADAM23 | 1 |
| hsa-miR-3917 NM_003812 | ADAM23 | 1 |
| hsa-miR-3915 NM_003812 | ADAM23 | 1 |
| hsa-miR-3915 NM_003812 | ADAM23 | 1 |
| hsa-miR-3924 NM_003812 | ADAM23 | 1 |
| hsa-miR-3924 NM_003812 | ADAM23 | 1 |
| hsa-miR-3925 NM_003812 | ADAM23 | 1 |
| hsa-miR-3938 NM_003812 | ADAM23 | 1 |
| hsa-miR-3945 NM_003812 | ADAM23 | 1 |
| hsa-miR-374c NM_003812 | ADAM23 | 1 |
| hsa-miR-642b NM_003812 | ADAM23 | 1 |
| hsa-miR-550b NM_003812 | ADAM23 | 1 |
| hsa-miR-550b NM_003812 | ADAM23 | 1 |
| hsa-miR-378f NM_003812 | ADAM23 | 1 |
| hsa-miR-4423 NM_003812 | ADAM23 | 1 |
| hsa-miR-4425 NM_003812 | ADAM23 | 1 |
| hsa-miR-4435 NM_003812 | ADAM23 | 1 |
| hsa-miR-4453 NM_003812 | ADAM23 | 1 |
| hsa-miR-4458 NM_003812 | ADAM23 | 1 |
| hsa-miR-378h NM_003812 | ADAM23 | 1 |
| hsa-miR-548a NM_003812 | ADAM23 | 1 |
| hsa-miR-4465 NM_003812 | ADAM23 | 1 |
| hsa-miR-4472 NM_003812 | ADAM23 | 1 |
| hsa-miR-4475 NM_003812 | ADAM23 | 1 |
| hsa-miR-3685 NM_003812 | ADAM23 | 1 |
| hsa-miR-4482 NM_003812 | ADAM23 | 1 |
| hsa-miR-4483 NM_003812 | ADAM23 | 1 |
| hsa-miR-4485 NM_003812 | ADAM23 | 1 |
| hsa-miR-4504 NM_003812 | ADAM23 | 1 |
| hsa-miR-2392 NM_003812 | ADAM23 | 1 |
| hsa-miR-451C NM_003812 | ADAM23 | 1 |
| hsa-miR-4515 NM_003812 | ADAM23 | 1 |
| hsa-miR-453C NM_003812 | ADAM23 | 1 |
| hsa-miR-4534 NM_003812 | ADAM23 | 1 |
| hsa-miR-378i NM_003812 | ADAM23 | 1 |
| hsa-miR-548a NM_003812 | ADAM23 | 1 |
| hsa-miR-454C NM_003812 | ADAM23 | 1 |
| hsa-miR-4635 NM_003812 | ADAM23 | 1 |
| hsa-miR-4648 NM_003812 | ADAM23 | 1 |
| hsa-miR-4645 NM_003812 | ADAM23 | 1 |
| hsa-miR-465C NM_003812 | ADAM23 | 1 |
| hsa-miR-4656 NM_003812 | ADAM23 | 1 |
| hsa-miR-466C NM_003812 | ADAM23 | 1 |
| hsa-miR-4661 NM_003812 | ADAM23 | 1 |
| hsa-miR-4667 NM_003812 | ADAM23 | 1 |
| hsa-miR-4671 NM_003812 | ADAM23 | 1 |
| hsa-miR-4682 NM_003812 | ADAM23 | 1 |
| hsa-miR-4684 NM_003812 | ADAM23 | 1 |
| hsa-miR-4685 NM_003812 | ADAM23 | 1 |
| hsa-miR-4698 NM_003812 | ADAM23 | 1 |
| hsa-miR-4704 NM_003812 | ADAM23 | 1 |
| hsa-miR-4705 NM_003812 | ADAM23 | 1 |
| hsa-miR-4713 NM_003812 | ADAM23 | 1 |
| hsa-miR-4716 NM_003812 | ADAM23 | 1 |
| hsa-miR-4723 NM_003812 | ADAM23 | 1 |
| hsa-miR-122b NM_003812 | ADAM23 | 1 |
| hsa-miR-4746 NM_003812 | ADAM23 | 1 |
| hsa-miR-4748 NM_003812 | ADAM23 | 1 |
| hsa-miR-4755 NM_003812 | ADAM23 | 1 |
| hsa-miR-4758 NM_003812 | ADAM23 | 1 |
| hsa-miR-4761 NM_003812 | ADAM23 | 1 |
| hsa-miR-4761 NM_003812 | ADAM23 | 1 |



|                         |        |            |
|-------------------------|--------|------------|
| hsa-miR-688C NM_003812  | ADAM23 | 1          |
| hsa-miR-6883 NM_003812  | ADAM23 | 1          |
| hsa-miR-6883 NM_003812  | ADAM23 | 1          |
| hsa-miR-6884 NM_003812  | ADAM23 | 1          |
| hsa-miR-6885 NM_003812  | ADAM23 | 1          |
| hsa-miR-6887 NM_003812  | ADAM23 | 1          |
| hsa-miR-6888 NM_003812  | ADAM23 | 1          |
| hsa-miR-689C NM_003812  | ADAM23 | 1          |
| hsa-miR-689C NM_003812  | ADAM23 | 1          |
| hsa-miR-6891 NM_003812  | ADAM23 | 1          |
| hsa-miR-6892 NM_003812  | ADAM23 | 1          |
| hsa-miR-6892 NM_003812  | ADAM23 | 1          |
| hsa-miR-7106 NM_003812  | ADAM23 | 1          |
| hsa-miR-7109 NM_003812  | ADAM23 | 1          |
| hsa-miR-711C NM_003812  | ADAM23 | 1          |
| hsa-miR-711C NM_003812  | ADAM23 | 1          |
| hsa-miR-7113 NM_003812  | ADAM23 | 1          |
| hsa-miR-7114 NM_003812  | ADAM23 | 1          |
| hsa-miR-7152 NM_003812  | ADAM23 | 1          |
| hsa-miR-7157 NM_003812  | ADAM23 | 1          |
| hsa-miR-7158 NM_003812  | ADAM23 | 1          |
| hsa-miR-7159 NM_003812  | ADAM23 | 1          |
| hsa-miR-7159 NM_003812  | ADAM23 | 1          |
| hsa-miR-7702 NM_003812  | ADAM23 | 1          |
| hsa-miR-4433 NM_003812  | ADAM23 | 1          |
| hsa-miR-4433 NM_003812  | ADAM23 | 1          |
| hsa-miR-7854 NM_003812  | ADAM23 | 1          |
| hsa-miR-7975 NM_003812  | ADAM23 | 1          |
| hsa-miR-8057 NM_003812  | ADAM23 | 1          |
| hsa-miR-8063 NM_003812  | ADAM23 | 1          |
| hsa-miR-8085 NM_003812  | ADAM23 | 1          |
| hsa-miR-8085 NM_003812  | ADAM23 | 1          |
| hsa-miR-8088 NM_003812  | ADAM23 | 1          |
| hsa-miR-8485 NM_003812  | ADAM23 | 1          |
| hsa-miR-990C NM_003812  | ADAM23 | 1          |
| hsa-miR-9986 NM_003812  | ADAM23 | 1          |
| hsa-miR-1022 NM_003812  | ADAM23 | 1          |
| hsa-miR-1039 NM_003812  | ADAM23 | 1          |
| hsa-miR-3085 NM_003812  | ADAM23 | 1          |
| hsa-miR-1212 NM_003812  | ADAM23 | 1          |
| hsa-miR-552- NM_003956  | CH25H  | 0.96153846 |
| hsa-miR-2277 NM_003956  | CH25H  | 0.96153846 |
| hsa-miR-4502 NM_003956  | CH25H  | 0.96153846 |
| hsa-miR-6768 NM_003956  | CH25H  | 0.96153846 |
| hsa-miR-6883 NM_003956  | CH25H  | 0.96153846 |
| hsa-miR-426C NM_003956  | CH25H  | 0.97435897 |
| hsa-miR-18a- NM_003956  | CH25H  | 1          |
| hsa-miR-99a- NM_003956  | CH25H  | 1          |
| hsa-miR-103a NM_003956  | CH25H  | 1          |
| hsa-miR-103a NM_003956  | CH25H  | 1          |
| hsa-miR-30c-4 NM_003956 | CH25H  | 1          |
| hsa-miR-181a NM_003956  | CH25H  | 1          |
| hsa-miR-216a NM_003956  | CH25H  | 1          |
| hsa-miR-219a NM_003956  | CH25H  | 1          |
| hsa-miR-224- NM_003956  | CH25H  | 1          |
| hsa-miR-30b-4 NM_003956 | CH25H  | 1          |
| hsa-miR-124- NM_003956  | CH25H  | 1          |
| hsa-miR-191- NM_003956  | CH25H  | 1          |
| hsa-miR-149- NM_003956  | CH25H  | 1          |
| hsa-miR-150- NM_003956  | CH25H  | 1          |
| hsa-miR-320a NM_003956  | CH25H  | 1          |
| hsa-miR-106b NM_003956  | CH25H  | 1          |
| hsa-miR-99b-4 NM_003956 | CH25H  | 1          |
| hsa-miR-372- NM_003956  | CH25H  | 1          |
| hsa-miR-328- NM_003956  | CH25H  | 1          |
| hsa-miR-326 NM_003956   | CH25H  | 1          |
| hsa-miR-331- NM_003956  | CH25H  | 1          |
| hsa-miR-339- NM_003956  | CH25H  | 1          |
| hsa-miR-346 NM_003956   | CH25H  | 1          |
| hsa-miR-423- NM_003956  | CH25H  | 1          |
| hsa-miR-448 NM_003956   | CH25H  | 1          |
| hsa-miR-429 NM_003956   | CH25H  | 1          |
| hsa-miR-483- NM_003956  | CH25H  | 1          |
| hsa-miR-494- NM_003956  | CH25H  | 1          |
| hsa-miR-515- NM_003956  | CH25H  | 1          |
| hsa-miR-519a NM_003956  | CH25H  | 1          |
| hsa-miR-526a NM_003956  | CH25H  | 1          |
| hsa-miR-516b NM_003956  | CH25H  | 1          |
| hsa-miR-574- NM_003956  | CH25H  | 1          |
| hsa-miR-579- NM_003956  | CH25H  | 1          |
| hsa-miR-585- NM_003956  | CH25H  | 1          |
| hsa-miR-585- NM_003956  | CH25H  | 1          |
| hsa-miR-595 NM_003956   | CH25H  | 1          |
| hsa-miR-609 NM_003956   | CH25H  | 1          |
| hsa-miR-613 NM_003956   | CH25H  | 1          |
| hsa-miR-632 NM_003956   | CH25H  | 1          |
| hsa-miR-636 NM_003956   | CH25H  | 1          |
| hsa-miR-640 NM_003956   | CH25H  | 1          |
| hsa-miR-641 NM_003956   | CH25H  | 1          |
| hsa-miR-642a NM_003956  | CH25H  | 1          |
| hsa-miR-643 NM_003956   | CH25H  | 1          |
| hsa-miR-449b NM_003956  | CH25H  | 1          |
| hsa-miR-1224 NM_003956  | CH25H  | 1          |
| hsa-miR-1296 NM_003956  | CH25H  | 1          |

|              |            |       |   |
|--------------|------------|-------|---|
| hsa-miR-764  | NM_003956  | CH25H | 1 |
| hsa-miR-891a | NM_003956  | CH25H | 1 |
| hsa-miR-877  | -NM_003956 | CH25H | 1 |
| hsa-miR-887  | -NM_003956 | CH25H | 1 |
| hsa-miR-760  | NM_003956  | CH25H | 1 |
| hsa-miR-938  | NM_003956  | CH25H | 1 |
| hsa-miR-940  | NM_003956  | CH25H | 1 |
| hsa-miR-940  | NM_003956  | CH25H | 1 |
| hsa-miR-1178 | NM_003956  | CH25H | 1 |
| hsa-miR-1178 | NM_003956  | CH25H | 1 |
| hsa-miR-1228 | NM_003956  | CH25H | 1 |
| hsa-miR-1236 | NM_003956  | CH25H | 1 |
| hsa-miR-1237 | NM_003956  | CH25H | 1 |
| hsa-miR-1238 | NM_003956  | CH25H | 1 |
| hsa-miR-1205 | NM_003956  | CH25H | 1 |
| hsa-miR-1249 | NM_003956  | CH25H | 1 |
| hsa-miR-1281 | NM_003956  | CH25H | 1 |
| hsa-miR-147C | NM_003956  | CH25H | 1 |
| hsa-miR-1909 | NM_003956  | CH25H | 1 |
| hsa-miR-1914 | NM_003956  | CH25H | 1 |
| hsa-miR-1914 | NM_003956  | CH25H | 1 |
| hsa-miR-1972 | NM_003956  | CH25H | 1 |
| hsa-miR-2681 | NM_003956  | CH25H | 1 |
| hsa-miR-3127 | NM_003956  | CH25H | 1 |
| hsa-miR-3139 | NM_003956  | CH25H | 1 |
| hsa-miR-1273 | NM_003956  | CH25H | 1 |
| hsa-miR-3174 | NM_003956  | CH25H | 1 |
| hsa-miR-3174 | NM_003956  | CH25H | 1 |
| hsa-miR-3184 | NM_003956  | CH25H | 1 |
| hsa-miR-3184 | NM_003956  | CH25H | 1 |
| hsa-miR-3188 | NM_003956  | CH25H | 1 |
| hsa-miR-3192 | NM_003956  | CH25H | 1 |
| hsa-miR-320C | NM_003956  | CH25H | 1 |
| hsa-miR-430C | NM_003956  | CH25H | 1 |
| hsa-miR-4312 | NM_003956  | CH25H | 1 |
| hsa-miR-4326 | NM_003956  | CH25H | 1 |
| hsa-miR-4274 | NM_003956  | CH25H | 1 |
| hsa-miR-4277 | NM_003956  | CH25H | 1 |
| hsa-miR-365C | NM_003956  | CH25H | 1 |
| hsa-miR-3692 | NM_003956  | CH25H | 1 |
| hsa-miR-676  | -NM_003956 | CH25H | 1 |
| hsa-miR-3938 | NM_003956  | CH25H | 1 |
| hsa-miR-3943 | NM_003956  | CH25H | 1 |
| hsa-miR-642b | NM_003956  | CH25H | 1 |
| hsa-miR-642b | NM_003956  | CH25H | 1 |
| hsa-miR-4451 | NM_003956  | CH25H | 1 |
| hsa-miR-4533 | NM_003956  | CH25H | 1 |
| hsa-miR-4632 | NM_003956  | CH25H | 1 |
| hsa-miR-464C | NM_003956  | CH25H | 1 |
| hsa-miR-4667 | NM_003956  | CH25H | 1 |
| hsa-miR-4667 | NM_003956  | CH25H | 1 |
| hsa-miR-4676 | NM_003956  | CH25H | 1 |
| hsa-miR-4687 | NM_003956  | CH25H | 1 |
| hsa-miR-4687 | NM_003956  | CH25H | 1 |
| hsa-miR-4689 | NM_003956  | CH25H | 1 |
| hsa-miR-4691 | NM_003956  | CH25H | 1 |
| hsa-miR-4697 | NM_003956  | CH25H | 1 |
| hsa-miR-470C | NM_003956  | CH25H | 1 |
| hsa-miR-4723 | NM_003956  | CH25H | 1 |
| hsa-miR-4725 | NM_003956  | CH25H | 1 |
| hsa-miR-4728 | NM_003956  | CH25H | 1 |
| hsa-miR-3064 | NM_003956  | CH25H | 1 |
| hsa-miR-4747 | NM_003956  | CH25H | 1 |
| hsa-miR-4749 | NM_003956  | CH25H | 1 |
| hsa-miR-4769 | NM_003956  | CH25H | 1 |
| hsa-miR-478C | NM_003956  | CH25H | 1 |
| hsa-miR-4785 | NM_003956  | CH25H | 1 |
| hsa-miR-5571 | NM_003956  | CH25H | 1 |
| hsa-miR-510C | NM_003956  | CH25H | 1 |
| hsa-miR-5581 | NM_003956  | CH25H | 1 |
| hsa-miR-5582 | NM_003956  | CH25H | 1 |
| hsa-miR-5584 | NM_003956  | CH25H | 1 |
| hsa-miR-5591 | NM_003956  | CH25H | 1 |
| hsa-miR-6129 | NM_003956  | CH25H | 1 |
| hsa-miR-6134 | NM_003956  | CH25H | 1 |
| hsa-miR-6514 | NM_003956  | CH25H | 1 |
| hsa-miR-6726 | NM_003956  | CH25H | 1 |
| hsa-miR-6728 | NM_003956  | CH25H | 1 |
| hsa-miR-6732 | NM_003956  | CH25H | 1 |
| hsa-miR-6736 | NM_003956  | CH25H | 1 |
| hsa-miR-6736 | NM_003956  | CH25H | 1 |
| hsa-miR-674C | NM_003956  | CH25H | 1 |
| hsa-miR-674C | NM_003956  | CH25H | 1 |
| hsa-miR-6744 | NM_003956  | CH25H | 1 |
| hsa-miR-6746 | NM_003956  | CH25H | 1 |
| hsa-miR-6751 | NM_003956  | CH25H | 1 |
| hsa-miR-6754 | NM_003956  | CH25H | 1 |
| hsa-miR-6754 | NM_003956  | CH25H | 1 |
| hsa-miR-6761 | NM_003956  | CH25H | 1 |
| hsa-miR-6762 | NM_003956  | CH25H | 1 |
| hsa-miR-6763 | NM_003956  | CH25H | 1 |
| hsa-miR-6767 | NM_003956  | CH25H | 1 |
| hsa-miR-6769 | NM_003956  | CH25H | 1 |
| hsa-miR-6774 | NM_003956  | CH25H | 1 |

|                        |       |            |
|------------------------|-------|------------|
| hsa-miR-6777 NM_003956 | CH25H | 1          |
| hsa-miR-6786 NM_003956 | CH25H | 1          |
| hsa-miR-6789 NM_003956 | CH25H | 1          |
| hsa-miR-6792 NM_003956 | CH25H | 1          |
| hsa-miR-6793 NM_003956 | CH25H | 1          |
| hsa-miR-6793 NM_003956 | CH25H | 1          |
| hsa-miR-6793 NM_003956 | CH25H | 1          |
| hsa-miR-6797 NM_003956 | CH25H | 1          |
| hsa-miR-6802 NM_003956 | CH25H | 1          |
| hsa-miR-6803 NM_003956 | CH25H | 1          |
| hsa-miR-6805 NM_003956 | CH25H | 1          |
| hsa-miR-6807 NM_003956 | CH25H | 1          |
| hsa-miR-6809 NM_003956 | CH25H | 1          |
| hsa-miR-6810 NM_003956 | CH25H | 1          |
| hsa-miR-6814 NM_003956 | CH25H | 1          |
| hsa-miR-6820 NM_003956 | CH25H | 1          |
| hsa-miR-6823 NM_003956 | CH25H | 1          |
| hsa-miR-6826 NM_003956 | CH25H | 1          |
| hsa-miR-6828 NM_003956 | CH25H | 1          |
| hsa-miR-6832 NM_003956 | CH25H | 1          |
| hsa-miR-6832 NM_003956 | CH25H | 1          |
| hsa-miR-6832 NM_003956 | CH25H | 1          |
| hsa-miR-6841 NM_003956 | CH25H | 1          |
| hsa-miR-6848 NM_003956 | CH25H | 1          |
| hsa-miR-6850 NM_003956 | CH25H | 1          |
| hsa-miR-6853 NM_003956 | CH25H | 1          |
| hsa-miR-6856 NM_003956 | CH25H | 1          |
| hsa-miR-6859 NM_003956 | CH25H | 1          |
| hsa-miR-6866 NM_003956 | CH25H | 1          |
| hsa-miR-6867 NM_003956 | CH25H | 1          |
| hsa-miR-6868 NM_003956 | CH25H | 1          |
| hsa-miR-6868 NM_003956 | CH25H | 1          |
| hsa-miR-6873 NM_003956 | CH25H | 1          |
| hsa-miR-6877 NM_003956 | CH25H | 1          |
| hsa-miR-6878 NM_003956 | CH25H | 1          |
| hsa-miR-6882 NM_003956 | CH25H | 1          |
| hsa-miR-6884 NM_003956 | CH25H | 1          |
| hsa-miR-6885 NM_003956 | CH25H | 1          |
| hsa-miR-6885 NM_003956 | CH25H | 1          |
| hsa-miR-6886 NM_003956 | CH25H | 1          |
| hsa-miR-6887 NM_003956 | CH25H | 1          |
| hsa-miR-6891 NM_003956 | CH25H | 1          |
| hsa-miR-6894 NM_003956 | CH25H | 1          |
| hsa-miR-7106 NM_003956 | CH25H | 1          |
| hsa-miR-7108 NM_003956 | CH25H | 1          |
| hsa-miR-7110 NM_003956 | CH25H | 1          |
| hsa-miR-7161 NM_003956 | CH25H | 1          |
| hsa-miR-7160 NM_003956 | CH25H | 1          |
| hsa-miR-7162 NM_003956 | CH25H | 1          |
| hsa-miR-7705 NM_003956 | CH25H | 1          |
| hsa-miR-7843 NM_003956 | CH25H | 1          |
| hsa-miR-8063 NM_003956 | CH25H | 1          |
| hsa-miR-8077 NM_003956 | CH25H | 1          |
| hsa-miR-8080 NM_003956 | CH25H | 1          |
| hsa-miR-9900 NM_003956 | CH25H | 1          |
| hsa-miR-1039 NM_003956 | CH25H | 1          |
| hsa-miR-1039 NM_003956 | CH25H | 1          |
| hsa-miR-1211 NM_003956 | CH25H | 1          |
| hsa-miR-1211 NM_003956 | CH25H | 1          |
| hsa-miR-1211 NM_003956 | CH25H | 1          |
| hsa-miR-4651 NM_080590 | CAPS  | 0.95384615 |
| hsa-miR-4651 NM_004058 | CAPS  | 0.95384615 |
| hsa-miR-6815 NM_080590 | CAPS  | 0.96153846 |
| hsa-miR-6815 NM_004058 | CAPS  | 0.96153846 |
| hsa-miR-7158 NM_080590 | CAPS  | 0.98076923 |
| hsa-miR-7160 NM_080590 | CAPS  | 0.98076923 |
| hsa-miR-7158 NM_004058 | CAPS  | 0.98076923 |
| hsa-miR-7160 NM_004058 | CAPS  | 0.98076923 |
| hsa-miR-18a- NM_080590 | CAPS  | 1          |
| hsa-miR-129- NM_080590 | CAPS  | 1          |
| hsa-miR-204- NM_080590 | CAPS  | 1          |
| hsa-miR-212- NM_080590 | CAPS  | 1          |
| hsa-miR-214- NM_080590 | CAPS  | 1          |
| hsa-miR-129- NM_080590 | CAPS  | 1          |
| hsa-miR-129- NM_080590 | CAPS  | 1          |
| hsa-miR-370- NM_080590 | CAPS  | 1          |
| hsa-miR-330- NM_080590 | CAPS  | 1          |
| hsa-miR-342- NM_080590 | CAPS  | 1          |
| hsa-miR-345- NM_080590 | CAPS  | 1          |
| hsa-miR-346- NM_080590 | CAPS  | 1          |
| hsa-miR-18b- NM_080590 | CAPS  | 1          |
| hsa-miR-329- NM_080590 | CAPS  | 1          |
| hsa-miR-486- NM_080590 | CAPS  | 1          |
| hsa-miR-497- NM_080590 | CAPS  | 1          |
| hsa-miR-500a NM_080590 | CAPS  | 1          |
| hsa-miR-502- NM_080590 | CAPS  | 1          |
| hsa-miR-502- NM_080590 | CAPS  | 1          |
| hsa-miR-554- NM_080590 | CAPS  | 1          |
| hsa-miR-612- NM_080590 | CAPS  | 1          |
| hsa-miR-625- NM_080590 | CAPS  | 1          |
| hsa-miR-652- NM_080590 | CAPS  | 1          |
| hsa-miR-769- NM_080590 | CAPS  | 1          |
| hsa-miR-766- NM_080590 | CAPS  | 1          |
| hsa-miR-874- NM_080590 | CAPS  | 1          |



|                        |      |   |
|------------------------|------|---|
| hsa-miR-939-NM_080590  | CAPS | 1 |
| hsa-miR-939-NM_080590  | CAPS | 1 |
| hsa-miR-941 NM_080590  | CAPS | 1 |
| hsa-miR-1182 NM_080590 | CAPS | 1 |
| hsa-miR-1226 NM_080590 | CAPS | 1 |
| hsa-miR-1226 NM_080590 | CAPS | 1 |
| hsa-miR-1205 NM_080590 | CAPS | 1 |
| hsa-miR-1260 NM_080590 | CAPS | 1 |
| hsa-miR-1266 NM_080590 | CAPS | 1 |
| hsa-miR-1282 NM_080590 | CAPS | 1 |
| hsa-miR-1284 NM_080590 | CAPS | 1 |
| hsa-miR-1322 NM_080590 | CAPS | 1 |
| hsa-miR-1470 NM_080590 | CAPS | 1 |
| hsa-miR-1471 NM_080590 | CAPS | 1 |
| hsa-miR-2115 NM_080590 | CAPS | 1 |
| hsa-miR-2276 NM_080590 | CAPS | 1 |
| hsa-miR-2276 NM_080590 | CAPS | 1 |
| hsa-miR-3126 NM_080590 | CAPS | 1 |
| hsa-miR-3132 NM_080590 | CAPS | 1 |
| hsa-miR-3158 NM_080590 | CAPS | 1 |
| hsa-miR-3184 NM_080590 | CAPS | 1 |
| hsa-miR-3189 NM_080590 | CAPS | 1 |
| hsa-miR-3196 NM_080590 | CAPS | 1 |
| hsa-miR-3195 NM_080590 | CAPS | 1 |
| hsa-miR-4304 NM_080590 | CAPS | 1 |
| hsa-miR-4313 NM_080590 | CAPS | 1 |
| hsa-miR-4324 NM_080590 | CAPS | 1 |
| hsa-miR-4254 NM_080590 | CAPS | 1 |
| hsa-miR-4268 NM_080590 | CAPS | 1 |
| hsa-miR-3621 NM_080590 | CAPS | 1 |
| hsa-miR-3622 NM_080590 | CAPS | 1 |
| hsa-miR-3680 NM_080590 | CAPS | 1 |
| hsa-miR-3713 NM_080590 | CAPS | 1 |
| hsa-miR-3907 NM_080590 | CAPS | 1 |
| hsa-miR-3922 NM_080590 | CAPS | 1 |
| hsa-miR-3928 NM_080590 | CAPS | 1 |
| hsa-miR-3937 NM_080590 | CAPS | 1 |
| hsa-miR-4446 NM_080590 | CAPS | 1 |
| hsa-miR-4448 NM_080590 | CAPS | 1 |
| hsa-miR-3155 NM_080590 | CAPS | 1 |
| hsa-miR-4489 NM_080590 | CAPS | 1 |
| hsa-miR-4508 NM_080590 | CAPS | 1 |
| hsa-miR-3978 NM_080590 | CAPS | 1 |
| hsa-miR-4676 NM_080590 | CAPS | 1 |
| hsa-miR-4686 NM_080590 | CAPS | 1 |
| hsa-miR-4710 NM_080590 | CAPS | 1 |
| hsa-miR-4724 NM_080590 | CAPS | 1 |
| hsa-miR-4767 NM_080590 | CAPS | 1 |
| hsa-miR-5008 NM_080590 | CAPS | 1 |
| hsa-miR-5010 NM_080590 | CAPS | 1 |
| hsa-miR-5581 NM_080590 | CAPS | 1 |
| hsa-miR-5680 NM_080590 | CAPS | 1 |
| hsa-miR-5735 NM_080590 | CAPS | 1 |
| hsa-miR-6072 NM_080590 | CAPS | 1 |
| hsa-miR-6132 NM_080590 | CAPS | 1 |
| hsa-miR-6134 NM_080590 | CAPS | 1 |
| hsa-miR-6719 NM_080590 | CAPS | 1 |
| hsa-miR-6724 NM_080590 | CAPS | 1 |
| hsa-miR-6728 NM_080590 | CAPS | 1 |
| hsa-miR-6734 NM_080590 | CAPS | 1 |
| hsa-miR-6747 NM_080590 | CAPS | 1 |
| hsa-miR-6748 NM_080590 | CAPS | 1 |
| hsa-miR-6758 NM_080590 | CAPS | 1 |
| hsa-miR-6763 NM_080590 | CAPS | 1 |
| hsa-miR-6775 NM_080590 | CAPS | 1 |
| hsa-miR-6781 NM_080590 | CAPS | 1 |
| hsa-miR-6784 NM_080590 | CAPS | 1 |
| hsa-miR-6795 NM_080590 | CAPS | 1 |
| hsa-miR-6795 NM_080590 | CAPS | 1 |
| hsa-miR-6813 NM_080590 | CAPS | 1 |
| hsa-miR-6818 NM_080590 | CAPS | 1 |
| hsa-miR-6824 NM_080590 | CAPS | 1 |
| hsa-miR-6827 NM_080590 | CAPS | 1 |
| hsa-miR-6829 NM_080590 | CAPS | 1 |
| hsa-miR-6834 NM_080590 | CAPS | 1 |
| hsa-miR-6842 NM_080590 | CAPS | 1 |
| hsa-miR-6852 NM_080590 | CAPS | 1 |
| hsa-miR-6853 NM_080590 | CAPS | 1 |
| hsa-miR-6857 NM_080590 | CAPS | 1 |
| hsa-miR-6858 NM_080590 | CAPS | 1 |
| hsa-miR-6866 NM_080590 | CAPS | 1 |
| hsa-miR-6871 NM_080590 | CAPS | 1 |
| hsa-miR-6872 NM_080590 | CAPS | 1 |
| hsa-miR-6877 NM_080590 | CAPS | 1 |
| hsa-miR-6878 NM_080590 | CAPS | 1 |
| hsa-miR-6880 NM_080590 | CAPS | 1 |
| hsa-miR-6884 NM_080590 | CAPS | 1 |
| hsa-miR-6887 NM_080590 | CAPS | 1 |
| hsa-miR-6894 NM_080590 | CAPS | 1 |
| hsa-miR-7106 NM_080590 | CAPS | 1 |
| hsa-miR-7108 NM_080590 | CAPS | 1 |
| hsa-miR-7114 NM_080590 | CAPS | 1 |
| hsa-miR-7114 NM_080590 | CAPS | 1 |
| hsa-miR-7155 NM_080590 | CAPS | 1 |

|              |           |      |   |
|--------------|-----------|------|---|
| hsa-miR-7703 | NM_080590 | CAPS | 1 |
| hsa-miR-4433 | NM_080590 | CAPS | 1 |
| hsa-miR-3059 | NM_080590 | CAPS | 1 |
| hsa-miR-18a- | NM_004058 | CAPS | 1 |
| hsa-miR-129- | NM_004058 | CAPS | 1 |
| hsa-miR-204- | NM_004058 | CAPS | 1 |
| hsa-miR-212- | NM_004058 | CAPS | 1 |
| hsa-miR-214- | NM_004058 | CAPS | 1 |
| hsa-miR-129- | NM_004058 | CAPS | 1 |
| hsa-miR-129- | NM_004058 | CAPS | 1 |
| hsa-miR-370- | NM_004058 | CAPS | 1 |
| hsa-miR-330- | NM_004058 | CAPS | 1 |
| hsa-miR-342- | NM_004058 | CAPS | 1 |
| hsa-miR-345- | NM_004058 | CAPS | 1 |
| hsa-miR-346  | NM_004058 | CAPS | 1 |
| hsa-miR-18b- | NM_004058 | CAPS | 1 |
| hsa-miR-329- | NM_004058 | CAPS | 1 |
| hsa-miR-486- | NM_004058 | CAPS | 1 |
| hsa-miR-497- | NM_004058 | CAPS | 1 |
| hsa-miR-500a | NM_004058 | CAPS | 1 |
| hsa-miR-502- | NM_004058 | CAPS | 1 |
| hsa-miR-502- | NM_004058 | CAPS | 1 |
| hsa-miR-554  | NM_004058 | CAPS | 1 |
| hsa-miR-612  | NM_004058 | CAPS | 1 |
| hsa-miR-625- | NM_004058 | CAPS | 1 |
| hsa-miR-652- | NM_004058 | CAPS | 1 |
| hsa-miR-769- | NM_004058 | CAPS | 1 |
| hsa-miR-766- | NM_004058 | CAPS | 1 |
| hsa-miR-874- | NM_004058 | CAPS | 1 |
| hsa-miR-877- | NM_004058 | CAPS | 1 |
| hsa-miR-939- | NM_004058 | CAPS | 1 |
| hsa-miR-939- | NM_004058 | CAPS | 1 |
| hsa-miR-941  | NM_004058 | CAPS | 1 |
| hsa-miR-1182 | NM_004058 | CAPS | 1 |
| hsa-miR-1226 | NM_004058 | CAPS | 1 |
| hsa-miR-1229 | NM_004058 | CAPS | 1 |
| hsa-miR-1205 | NM_004058 | CAPS | 1 |
| hsa-miR-1260 | NM_004058 | CAPS | 1 |
| hsa-miR-1266 | NM_004058 | CAPS | 1 |
| hsa-miR-1282 | NM_004058 | CAPS | 1 |
| hsa-miR-1284 | NM_004058 | CAPS | 1 |
| hsa-miR-1322 | NM_004058 | CAPS | 1 |
| hsa-miR-1470 | NM_004058 | CAPS | 1 |
| hsa-miR-1471 | NM_004058 | CAPS | 1 |
| hsa-miR-2115 | NM_004058 | CAPS | 1 |
| hsa-miR-2276 | NM_004058 | CAPS | 1 |
| hsa-miR-2276 | NM_004058 | CAPS | 1 |
| hsa-miR-3126 | NM_004058 | CAPS | 1 |
| hsa-miR-3132 | NM_004058 | CAPS | 1 |
| hsa-miR-3158 | NM_004058 | CAPS | 1 |
| hsa-miR-3184 | NM_004058 | CAPS | 1 |
| hsa-miR-3189 | NM_004058 | CAPS | 1 |
| hsa-miR-3196 | NM_004058 | CAPS | 1 |
| hsa-miR-3199 | NM_004058 | CAPS | 1 |
| hsa-miR-4304 | NM_004058 | CAPS | 1 |
| hsa-miR-4313 | NM_004058 | CAPS | 1 |
| hsa-miR-4324 | NM_004058 | CAPS | 1 |
| hsa-miR-4254 | NM_004058 | CAPS | 1 |
| hsa-miR-4268 | NM_004058 | CAPS | 1 |
| hsa-miR-3621 | NM_004058 | CAPS | 1 |
| hsa-miR-3622 | NM_004058 | CAPS | 1 |
| hsa-miR-3680 | NM_004058 | CAPS | 1 |
| hsa-miR-3713 | NM_004058 | CAPS | 1 |
| hsa-miR-3907 | NM_004058 | CAPS | 1 |
| hsa-miR-3922 | NM_004058 | CAPS | 1 |
| hsa-miR-3928 | NM_004058 | CAPS | 1 |
| hsa-miR-3937 | NM_004058 | CAPS | 1 |
| hsa-miR-4446 | NM_004058 | CAPS | 1 |
| hsa-miR-4448 | NM_004058 | CAPS | 1 |
| hsa-miR-3155 | NM_004058 | CAPS | 1 |
| hsa-miR-4489 | NM_004058 | CAPS | 1 |
| hsa-miR-4508 | NM_004058 | CAPS | 1 |
| hsa-miR-3978 | NM_004058 | CAPS | 1 |
| hsa-miR-4676 | NM_004058 | CAPS | 1 |
| hsa-miR-4686 | NM_004058 | CAPS | 1 |
| hsa-miR-4710 | NM_004058 | CAPS | 1 |
| hsa-miR-4724 | NM_004058 | CAPS | 1 |
| hsa-miR-4767 | NM_004058 | CAPS | 1 |
| hsa-miR-5008 | NM_004058 | CAPS | 1 |
| hsa-miR-5010 | NM_004058 | CAPS | 1 |
| hsa-miR-5581 | NM_004058 | CAPS | 1 |
| hsa-miR-5680 | NM_004058 | CAPS | 1 |
| hsa-miR-5739 | NM_004058 | CAPS | 1 |
| hsa-miR-6072 | NM_004058 | CAPS | 1 |
| hsa-miR-6132 | NM_004058 | CAPS | 1 |
| hsa-miR-6134 | NM_004058 | CAPS | 1 |
| hsa-miR-6719 | NM_004058 | CAPS | 1 |
| hsa-miR-6724 | NM_004058 | CAPS | 1 |
| hsa-miR-6728 | NM_004058 | CAPS | 1 |
| hsa-miR-6734 | NM_004058 | CAPS | 1 |
| hsa-miR-6747 | NM_004058 | CAPS | 1 |
| hsa-miR-6748 | NM_004058 | CAPS | 1 |
| hsa-miR-6758 | NM_004058 | CAPS | 1 |
| hsa-miR-6763 | NM_004058 | CAPS | 1 |

|              |           |        |            |
|--------------|-----------|--------|------------|
| hsa-miR-6775 | NM_004058 | CAPS   | 1          |
| hsa-miR-6781 | NM_004058 | CAPS   | 1          |
| hsa-miR-6784 | NM_004058 | CAPS   | 1          |
| hsa-miR-6795 | NM_004058 | CAPS   | 1          |
| hsa-miR-6795 | NM_004058 | CAPS   | 1          |
| hsa-miR-6813 | NM_004058 | CAPS   | 1          |
| hsa-miR-6818 | NM_004058 | CAPS   | 1          |
| hsa-miR-6824 | NM_004058 | CAPS   | 1          |
| hsa-miR-6827 | NM_004058 | CAPS   | 1          |
| hsa-miR-6829 | NM_004058 | CAPS   | 1          |
| hsa-miR-6834 | NM_004058 | CAPS   | 1          |
| hsa-miR-6842 | NM_004058 | CAPS   | 1          |
| hsa-miR-6852 | NM_004058 | CAPS   | 1          |
| hsa-miR-6853 | NM_004058 | CAPS   | 1          |
| hsa-miR-6857 | NM_004058 | CAPS   | 1          |
| hsa-miR-6858 | NM_004058 | CAPS   | 1          |
| hsa-miR-6866 | NM_004058 | CAPS   | 1          |
| hsa-miR-6871 | NM_004058 | CAPS   | 1          |
| hsa-miR-6872 | NM_004058 | CAPS   | 1          |
| hsa-miR-6877 | NM_004058 | CAPS   | 1          |
| hsa-miR-6878 | NM_004058 | CAPS   | 1          |
| hsa-miR-6880 | NM_004058 | CAPS   | 1          |
| hsa-miR-6884 | NM_004058 | CAPS   | 1          |
| hsa-miR-6887 | NM_004058 | CAPS   | 1          |
| hsa-miR-6894 | NM_004058 | CAPS   | 1          |
| hsa-miR-7106 | NM_004058 | CAPS   | 1          |
| hsa-miR-7108 | NM_004058 | CAPS   | 1          |
| hsa-miR-7114 | NM_004058 | CAPS   | 1          |
| hsa-miR-7114 | NM_004058 | CAPS   | 1          |
| hsa-miR-7155 | NM_004058 | CAPS   | 1          |
| hsa-miR-7703 | NM_004058 | CAPS   | 1          |
| hsa-miR-4433 | NM_004058 | CAPS   | 1          |
| hsa-miR-3059 | NM_004058 | CAPS   | 1          |
| hsa-miR-151a | NM_004289 | NFE2L3 | 0.96153846 |
| hsa-miR-491- | NM_004289 | NFE2L3 | 0.97435897 |
| hsa-miR-937- | NM_004289 | NFE2L3 | 0.97435897 |
| hsa-miR-3659 | NM_004289 | NFE2L3 | 0.97435897 |
| hsa-miR-525- | NM_004289 | NFE2L3 | 0.98076923 |
| hsa-miR-765  | NM_004289 | NFE2L3 | 0.98076923 |
| hsa-miR-23a- | NM_004289 | NFE2L3 | 1          |
| hsa-miR-27a- | NM_004289 | NFE2L3 | 1          |
| hsa-miR-199a | NM_004289 | NFE2L3 | 1          |
| hsa-miR-212- | NM_004289 | NFE2L3 | 1          |
| hsa-miR-215- | NM_004289 | NFE2L3 | 1          |
| hsa-miR-143- | NM_004289 | NFE2L3 | 1          |
| hsa-miR-362- | NM_004289 | NFE2L3 | 1          |
| hsa-miR-487a | NM_004289 | NFE2L3 | 1          |
| hsa-miR-519e | NM_004289 | NFE2L3 | 1          |
| hsa-miR-520g | NM_004289 | NFE2L3 | 1          |
| hsa-miR-556- | NM_004289 | NFE2L3 | 1          |
| hsa-miR-644a | NM_004289 | NFE2L3 | 1          |
| hsa-miR-1185 | NM_004289 | NFE2L3 | 1          |
| hsa-miR-937- | NM_004289 | NFE2L3 | 1          |
| hsa-miR-1179 | NM_004289 | NFE2L3 | 1          |
| hsa-miR-3150 | NM_004289 | NFE2L3 | 1          |
| hsa-miR-4299 | NM_004289 | NFE2L3 | 1          |
| hsa-miR-4268 | NM_004289 | NFE2L3 | 1          |
| hsa-miR-4714 | NM_004289 | NFE2L3 | 1          |
| hsa-miR-4717 | NM_004289 | NFE2L3 | 1          |
| hsa-miR-4755 | NM_004289 | NFE2L3 | 1          |
| hsa-miR-5584 | NM_004289 | NFE2L3 | 1          |
| hsa-miR-5681 | NM_004289 | NFE2L3 | 1          |
| hsa-miR-5684 | NM_004289 | NFE2L3 | 1          |
| hsa-miR-6757 | NM_004289 | NFE2L3 | 1          |
| hsa-miR-6780 | NM_004289 | NFE2L3 | 1          |
| hsa-miR-6871 | NM_004289 | NFE2L3 | 1          |
| hsa-miR-7155 | NM_004289 | NFE2L3 | 1          |
| hsa-miR-7845 | NM_004289 | NFE2L3 | 1          |
| hsa-miR-4743 | NM_004751 | GCNT3  | 0.95879121 |
| hsa-miR-193a | NM_004751 | GCNT3  | 0.96153846 |
| hsa-miR-99b- | NM_004751 | GCNT3  | 0.96153846 |
| hsa-miR-383- | NM_004751 | GCNT3  | 0.96153846 |
| hsa-miR-376a | NM_004751 | GCNT3  | 0.96153846 |
| hsa-miR-1207 | NM_004751 | GCNT3  | 0.96153846 |
| hsa-miR-1270 | NM_004751 | GCNT3  | 0.96153846 |
| hsa-miR-4279 | NM_004751 | GCNT3  | 0.96153846 |
| hsa-miR-4280 | NM_004751 | GCNT3  | 0.96153846 |
| hsa-miR-3940 | NM_004751 | GCNT3  | 0.96153846 |
| hsa-miR-4734 | NM_004751 | GCNT3  | 0.96153846 |
| hsa-miR-4754 | NM_004751 | GCNT3  | 0.96153846 |
| hsa-miR-4436 | NM_004751 | GCNT3  | 0.96153846 |
| hsa-miR-6739 | NM_004751 | GCNT3  | 0.96153846 |
| hsa-miR-6753 | NM_004751 | GCNT3  | 0.96153846 |
| hsa-miR-6833 | NM_004751 | GCNT3  | 0.96153846 |
| hsa-miR-6864 | NM_004751 | GCNT3  | 0.96153846 |
| hsa-miR-6891 | NM_004751 | GCNT3  | 0.96153846 |
| hsa-miR-7108 | NM_004751 | GCNT3  | 0.96153846 |
| hsa-miR-602  | NM_004751 | GCNT3  | 0.96923077 |
| hsa-miR-3681 | NM_004751 | GCNT3  | 0.96923077 |
| hsa-miR-4725 | NM_004751 | GCNT3  | 0.96923077 |
| hsa-miR-5092 | NM_004751 | GCNT3  | 0.96923077 |
| hsa-miR-107  | NM_004751 | GCNT3  | 0.97435897 |
| hsa-miR-485- | NM_004751 | GCNT3  | 0.97435897 |
| hsa-miR-1253 | NM_004751 | GCNT3  | 0.97435897 |

|                          |       |            |
|--------------------------|-------|------------|
| hsa-miR-2117 NM_004751   | GCNT3 | 0.97435897 |
| hsa-miR-4445 NM_004751   | GCNT3 | 0.97435897 |
| hsa-miR-466C NM_004751   | GCNT3 | 0.97435897 |
| hsa-miR-1211 NM_004751   | GCNT3 | 0.97435897 |
| hsa-miR-4322 NM_004751   | GCNT3 | 0.98076923 |
| hsa-miR-3652 NM_004751   | GCNT3 | 0.98076923 |
| hsa-miR-609C NM_004751   | GCNT3 | 0.98076923 |
| hsa-miR-4482 NM_004751   | GCNT3 | 0.99145299 |
| hsa-let-7a-2-3 NM_004751 | GCNT3 | 1          |
| hsa-let-7b-5p NM_004751  | GCNT3 | 1          |
| hsa-let-7e-5p NM_004751  | GCNT3 | 1          |
| hsa-let-7e-5p NM_004751  | GCNT3 | 1          |
| hsa-let-7e-5p NM_004751  | GCNT3 | 1          |
| hsa-miR-17-5j NM_004751  | GCNT3 | 1          |
| hsa-miR-18a- NM_004751   | GCNT3 | 1          |
| hsa-miR-21-3j NM_004751  | GCNT3 | 1          |
| hsa-miR-23a- NM_004751   | GCNT3 | 1          |
| hsa-miR-24-3j NM_004751  | GCNT3 | 1          |
| hsa-miR-24-3j NM_004751  | GCNT3 | 1          |
| hsa-miR-25-3j NM_004751  | GCNT3 | 1          |
| hsa-miR-26b- NM_004751   | GCNT3 | 1          |
| hsa-miR-27a- NM_004751   | GCNT3 | 1          |
| hsa-miR-27a- NM_004751   | GCNT3 | 1          |
| hsa-miR-33a- NM_004751   | GCNT3 | 1          |
| hsa-miR-92a- NM_004751   | GCNT3 | 1          |
| hsa-miR-92a- NM_004751   | GCNT3 | 1          |
| hsa-miR-93-5j NM_004751  | GCNT3 | 1          |
| hsa-miR-29b- NM_004751   | GCNT3 | 1          |
| hsa-miR-29b- NM_004751   | GCNT3 | 1          |
| hsa-miR-29b- NM_004751   | GCNT3 | 1          |
| hsa-miR-103a NM_004751   | GCNT3 | 1          |
| hsa-miR-105- NM_004751   | GCNT3 | 1          |
| hsa-miR-199a NM_004751   | GCNT3 | 1          |
| hsa-miR-208a NM_004751   | GCNT3 | 1          |
| hsa-miR-208a NM_004751   | GCNT3 | 1          |
| hsa-miR-30c- NM_004751   | GCNT3 | 1          |
| hsa-miR-139- NM_004751   | GCNT3 | 1          |
| hsa-miR-139- NM_004751   | GCNT3 | 1          |
| hsa-miR-10a- NM_004751   | GCNT3 | 1          |
| hsa-miR-181c NM_004751   | GCNT3 | 1          |
| hsa-miR-187- NM_004751   | GCNT3 | 1          |
| hsa-miR-187- NM_004751   | GCNT3 | 1          |
| hsa-miR-204- NM_004751   | GCNT3 | 1          |
| hsa-miR-205- NM_004751   | GCNT3 | 1          |
| hsa-miR-211- NM_004751   | GCNT3 | 1          |
| hsa-miR-222- NM_004751   | GCNT3 | 1          |
| hsa-miR-222- NM_004751   | GCNT3 | 1          |
| hsa-miR-27b- NM_004751   | GCNT3 | 1          |
| hsa-miR-30b- NM_004751   | GCNT3 | 1          |
| hsa-miR-30b- NM_004751   | GCNT3 | 1          |
| hsa-miR-125t NM_004751   | GCNT3 | 1          |
| hsa-miR-140- NM_004751   | GCNT3 | 1          |
| hsa-miR-142- NM_004751   | GCNT3 | 1          |
| hsa-miR-143- NM_004751   | GCNT3 | 1          |
| hsa-miR-125a NM_004751   | GCNT3 | 1          |
| hsa-miR-125a NM_004751   | GCNT3 | 1          |
| hsa-miR-127- NM_004751   | GCNT3 | 1          |
| hsa-miR-149- NM_004751   | GCNT3 | 1          |
| hsa-miR-149- NM_004751   | GCNT3 | 1          |
| hsa-miR-150- NM_004751   | GCNT3 | 1          |
| hsa-miR-150- NM_004751   | GCNT3 | 1          |
| hsa-miR-188- NM_004751   | GCNT3 | 1          |
| hsa-miR-188- NM_004751   | GCNT3 | 1          |
| hsa-miR-193a NM_004751   | GCNT3 | 1          |
| hsa-miR-195- NM_004751   | GCNT3 | 1          |
| hsa-miR-320a NM_004751   | GCNT3 | 1          |
| hsa-miR-320a NM_004751   | GCNT3 | 1          |
| hsa-miR-320a NM_004751   | GCNT3 | 1          |
| hsa-miR-106t NM_004751   | GCNT3 | 1          |
| hsa-miR-106t NM_004751   | GCNT3 | 1          |
| hsa-miR-30c- NM_004751   | GCNT3 | 1          |
| hsa-miR-302a NM_004751   | GCNT3 | 1          |
| hsa-miR-219a NM_004751   | GCNT3 | 1          |
| hsa-miR-99b- NM_004751   | GCNT3 | 1          |
| hsa-miR-296- NM_004751   | GCNT3 | 1          |
| hsa-miR-362- NM_004751   | GCNT3 | 1          |
| hsa-miR-365a NM_004751   | GCNT3 | 1          |
| hsa-miR-365a NM_004751   | GCNT3 | 1          |
| hsa-miR-365t NM_004751   | GCNT3 | 1          |
| hsa-miR-302d NM_004751   | GCNT3 | 1          |
| hsa-miR-367- NM_004751   | GCNT3 | 1          |
| hsa-miR-367- NM_004751   | GCNT3 | 1          |
| hsa-miR-370- NM_004751   | GCNT3 | 1          |
| hsa-miR-372- NM_004751   | GCNT3 | 1          |
| hsa-miR-376a NM_004751   | GCNT3 | 1          |
| hsa-miR-378a NM_004751   | GCNT3 | 1          |
| hsa-miR-383- NM_004751   | GCNT3 | 1          |
| hsa-miR-340- NM_004751   | GCNT3 | 1          |
| hsa-miR-330- NM_004751   | GCNT3 | 1          |
| hsa-miR-342- NM_004751   | GCNT3 | 1          |
| hsa-miR-338- NM_004751   | GCNT3 | 1          |
| hsa-miR-335- NM_004751   | GCNT3 | 1          |
| hsa-miR-18b- NM_004751   | GCNT3 | 1          |
| hsa-miR-20b- NM_004751   | GCNT3 | 1          |

|              |           |       |   |
|--------------|-----------|-------|---|
| hsa-miR-431- | NM_004751 | GCNT3 | 1 |
| hsa-miR-412- | NM_004751 | GCNT3 | 1 |
| hsa-miR-376t | NM_004751 | GCNT3 | 1 |
| hsa-miR-483- | NM_004751 | GCNT3 | 1 |
| hsa-miR-484  | NM_004751 | GCNT3 | 1 |
| hsa-miR-493- | NM_004751 | GCNT3 | 1 |
| hsa-miR-496  | NM_004751 | GCNT3 | 1 |
| hsa-miR-497- | NM_004751 | GCNT3 | 1 |
| hsa-miR-181c | NM_004751 | GCNT3 | 1 |
| hsa-miR-512- | NM_004751 | GCNT3 | 1 |
| hsa-miR-520t | NM_004751 | GCNT3 | 1 |
| hsa-miR-518t | NM_004751 | GCNT3 | 1 |
| hsa-miR-526a | NM_004751 | GCNT3 | 1 |
| hsa-miR-520c | NM_004751 | GCNT3 | 1 |
| hsa-miR-519a | NM_004751 | GCNT3 | 1 |
| hsa-miR-501- | NM_004751 | GCNT3 | 1 |
| hsa-miR-502- | NM_004751 | GCNT3 | 1 |
| hsa-miR-504- | NM_004751 | GCNT3 | 1 |
| hsa-miR-505- | NM_004751 | GCNT3 | 1 |
| hsa-miR-508- | NM_004751 | GCNT3 | 1 |
| hsa-miR-532- | NM_004751 | GCNT3 | 1 |
| hsa-miR-92b- | NM_004751 | GCNT3 | 1 |
| hsa-miR-551t | NM_004751 | GCNT3 | 1 |
| hsa-miR-574- | NM_004751 | GCNT3 | 1 |
| hsa-miR-584- | NM_004751 | GCNT3 | 1 |
| hsa-miR-585- | NM_004751 | GCNT3 | 1 |
| hsa-miR-589- | NM_004751 | GCNT3 | 1 |
| hsa-miR-550a | NM_004751 | GCNT3 | 1 |
| hsa-miR-593- | NM_004751 | GCNT3 | 1 |
| hsa-miR-595  | NM_004751 | GCNT3 | 1 |
| hsa-miR-605- | NM_004751 | GCNT3 | 1 |
| hsa-miR-612  | NM_004751 | GCNT3 | 1 |
| hsa-miR-615- | NM_004751 | GCNT3 | 1 |
| hsa-miR-615- | NM_004751 | GCNT3 | 1 |
| hsa-miR-619- | NM_004751 | GCNT3 | 1 |
| hsa-miR-634  | NM_004751 | GCNT3 | 1 |
| hsa-miR-639  | NM_004751 | GCNT3 | 1 |
| hsa-miR-642a | NM_004751 | GCNT3 | 1 |
| hsa-miR-643  | NM_004751 | GCNT3 | 1 |
| hsa-miR-645  | NM_004751 | GCNT3 | 1 |
| hsa-miR-662  | NM_004751 | GCNT3 | 1 |
| hsa-miR-662  | NM_004751 | GCNT3 | 1 |
| hsa-miR-663a | NM_004751 | GCNT3 | 1 |
| hsa-miR-654- | NM_004751 | GCNT3 | 1 |
| hsa-miR-657  | NM_004751 | GCNT3 | 1 |
| hsa-miR-658  | NM_004751 | GCNT3 | 1 |
| hsa-miR-659- | NM_004751 | GCNT3 | 1 |
| hsa-miR-671- | NM_004751 | GCNT3 | 1 |
| hsa-miR-671- | NM_004751 | GCNT3 | 1 |
| hsa-miR-767- | NM_004751 | GCNT3 | 1 |
| hsa-miR-1224 | NM_004751 | GCNT3 | 1 |
| hsa-miR-1224 | NM_004751 | GCNT3 | 1 |
| hsa-miR-320t | NM_004751 | GCNT3 | 1 |
| hsa-miR-320t | NM_004751 | GCNT3 | 1 |
| hsa-miR-320c | NM_004751 | GCNT3 | 1 |
| hsa-miR-1296 | NM_004751 | GCNT3 | 1 |
| hsa-miR-1271 | NM_004751 | GCNT3 | 1 |
| hsa-miR-1301 | NM_004751 | GCNT3 | 1 |
| hsa-miR-449c | NM_004751 | GCNT3 | 1 |
| hsa-miR-449c | NM_004751 | GCNT3 | 1 |
| hsa-miR-766- | NM_004751 | GCNT3 | 1 |
| hsa-miR-670- | NM_004751 | GCNT3 | 1 |
| hsa-miR-1298 | NM_004751 | GCNT3 | 1 |
| hsa-miR-2113 | NM_004751 | GCNT3 | 1 |
| hsa-miR-761  | NM_004751 | GCNT3 | 1 |
| hsa-miR-764  | NM_004751 | GCNT3 | 1 |
| hsa-miR-891a | NM_004751 | GCNT3 | 1 |
| hsa-miR-874- | NM_004751 | GCNT3 | 1 |
| hsa-miR-541- | NM_004751 | GCNT3 | 1 |
| hsa-miR-876- | NM_004751 | GCNT3 | 1 |
| hsa-miR-147t | NM_004751 | GCNT3 | 1 |
| hsa-miR-665  | NM_004751 | GCNT3 | 1 |
| hsa-miR-216t | NM_004751 | GCNT3 | 1 |
| hsa-miR-509- | NM_004751 | GCNT3 | 1 |
| hsa-miR-937- | NM_004751 | GCNT3 | 1 |
| hsa-miR-939- | NM_004751 | GCNT3 | 1 |
| hsa-miR-939- | NM_004751 | GCNT3 | 1 |
| hsa-miR-940  | NM_004751 | GCNT3 | 1 |
| hsa-miR-1182 | NM_004751 | GCNT3 | 1 |
| hsa-miR-1226 | NM_004751 | GCNT3 | 1 |
| hsa-miR-1226 | NM_004751 | GCNT3 | 1 |
| hsa-miR-1227 | NM_004751 | GCNT3 | 1 |
| hsa-miR-1228 | NM_004751 | GCNT3 | 1 |
| hsa-miR-1229 | NM_004751 | GCNT3 | 1 |
| hsa-miR-1229 | NM_004751 | GCNT3 | 1 |
| hsa-miR-1231 | NM_004751 | GCNT3 | 1 |
| hsa-miR-1233 | NM_004751 | GCNT3 | 1 |
| hsa-miR-1233 | NM_004751 | GCNT3 | 1 |
| hsa-miR-1234 | NM_004751 | GCNT3 | 1 |
| hsa-miR-1236 | NM_004751 | GCNT3 | 1 |
| hsa-miR-1237 | NM_004751 | GCNT3 | 1 |
| hsa-miR-1202 | NM_004751 | GCNT3 | 1 |
| hsa-miR-1204 | NM_004751 | GCNT3 | 1 |
| hsa-miR-1205 | NM_004751 | GCNT3 | 1 |

|                        |       |   |
|------------------------|-------|---|
| hsa-miR-1207 NM_004751 | GCNT3 | 1 |
| hsa-miR-1285 NM_004751 | GCNT3 | 1 |
| hsa-miR-1303 NM_004751 | GCNT3 | 1 |
| hsa-miR-1304 NM_004751 | GCNT3 | 1 |
| hsa-miR-1247 NM_004751 | GCNT3 | 1 |
| hsa-miR-1247 NM_004751 | GCNT3 | 1 |
| hsa-miR-1253 NM_004751 | GCNT3 | 1 |
| hsa-miR-1265 NM_004751 | GCNT3 | 1 |
| hsa-miR-1266 NM_004751 | GCNT3 | 1 |
| hsa-miR-1268 NM_004751 | GCNT3 | 1 |
| hsa-miR-1281 NM_004751 | GCNT3 | 1 |
| hsa-miR-1321 NM_004751 | GCNT3 | 1 |
| hsa-miR-1469 NM_004751 | GCNT3 | 1 |
| hsa-miR-320d NM_004751 | GCNT3 | 1 |
| hsa-miR-191C NM_004751 | GCNT3 | 1 |
| hsa-miR-1911 NM_004751 | GCNT3 | 1 |
| hsa-miR-1972 NM_004751 | GCNT3 | 1 |
| hsa-miR-1972 NM_004751 | GCNT3 | 1 |
| hsa-miR-2115 NM_004751 | GCNT3 | 1 |
| hsa-miR-2116 NM_004751 | GCNT3 | 1 |
| hsa-miR-2276 NM_004751 | GCNT3 | 1 |
| hsa-miR-718 NM_004751  | GCNT3 | 1 |
| hsa-miR-313C NM_004751 | GCNT3 | 1 |
| hsa-miR-378b NM_004751 | GCNT3 | 1 |
| hsa-miR-3137 NM_004751 | GCNT3 | 1 |
| hsa-miR-3138 NM_004751 | GCNT3 | 1 |
| hsa-miR-3138 NM_004751 | GCNT3 | 1 |
| hsa-miR-314C NM_004751 | GCNT3 | 1 |
| hsa-miR-3144 NM_004751 | GCNT3 | 1 |
| hsa-miR-3144 NM_004751 | GCNT3 | 1 |
| hsa-miR-1273 NM_004751 | GCNT3 | 1 |
| hsa-miR-315C NM_004751 | GCNT3 | 1 |
| hsa-miR-315C NM_004751 | GCNT3 | 1 |
| hsa-miR-3074 NM_004751 | GCNT3 | 1 |
| hsa-miR-3154 NM_004751 | GCNT3 | 1 |
| hsa-miR-3155 NM_004751 | GCNT3 | 1 |
| hsa-miR-3157 NM_004751 | GCNT3 | 1 |
| hsa-miR-3159 NM_004751 | GCNT3 | 1 |
| hsa-miR-316C NM_004751 | GCNT3 | 1 |
| hsa-miR-3162 NM_004751 | GCNT3 | 1 |
| hsa-miR-3169 NM_004751 | GCNT3 | 1 |
| hsa-miR-323b NM_004751 | GCNT3 | 1 |
| hsa-miR-3175 NM_004751 | GCNT3 | 1 |
| hsa-miR-3176 NM_004751 | GCNT3 | 1 |
| hsa-miR-3177 NM_004751 | GCNT3 | 1 |
| hsa-miR-3178 NM_004751 | GCNT3 | 1 |
| hsa-miR-318C NM_004751 | GCNT3 | 1 |
| hsa-miR-3065 NM_004751 | GCNT3 | 1 |
| hsa-miR-3187 NM_004751 | GCNT3 | 1 |
| hsa-miR-3187 NM_004751 | GCNT3 | 1 |
| hsa-miR-319C NM_004751 | GCNT3 | 1 |
| hsa-miR-3191 NM_004751 | GCNT3 | 1 |
| hsa-miR-3192 NM_004751 | GCNT3 | 1 |
| hsa-miR-3194 NM_004751 | GCNT3 | 1 |
| hsa-miR-3194 NM_004751 | GCNT3 | 1 |
| hsa-miR-3198 NM_004751 | GCNT3 | 1 |
| hsa-miR-514b NM_004751 | GCNT3 | 1 |
| hsa-miR-4296 NM_004751 | GCNT3 | 1 |
| hsa-miR-4293 NM_004751 | GCNT3 | 1 |
| hsa-miR-4299 NM_004751 | GCNT3 | 1 |
| hsa-miR-4298 NM_004751 | GCNT3 | 1 |
| hsa-miR-4298 NM_004751 | GCNT3 | 1 |
| hsa-miR-4322 NM_004751 | GCNT3 | 1 |
| hsa-miR-4323 NM_004751 | GCNT3 | 1 |
| hsa-miR-4257 NM_004751 | GCNT3 | 1 |
| hsa-miR-426C NM_004751 | GCNT3 | 1 |
| hsa-miR-4253 NM_004751 | GCNT3 | 1 |
| hsa-miR-4326 NM_004751 | GCNT3 | 1 |
| hsa-miR-4326 NM_004751 | GCNT3 | 1 |
| hsa-miR-4265 NM_004751 | GCNT3 | 1 |
| hsa-miR-4268 NM_004751 | GCNT3 | 1 |
| hsa-miR-4277 NM_004751 | GCNT3 | 1 |
| hsa-miR-4282 NM_004751 | GCNT3 | 1 |
| hsa-miR-4284 NM_004751 | GCNT3 | 1 |
| hsa-miR-4284 NM_004751 | GCNT3 | 1 |
| hsa-miR-4289 NM_004751 | GCNT3 | 1 |
| hsa-miR-500b NM_004751 | GCNT3 | 1 |
| hsa-miR-3605 NM_004751 | GCNT3 | 1 |
| hsa-miR-3614 NM_004751 | GCNT3 | 1 |
| hsa-miR-3615 NM_004751 | GCNT3 | 1 |
| hsa-miR-3615 NM_004751 | GCNT3 | 1 |
| hsa-miR-362C NM_004751 | GCNT3 | 1 |
| hsa-miR-362C NM_004751 | GCNT3 | 1 |
| hsa-miR-3621 NM_004751 | GCNT3 | 1 |
| hsa-miR-3622 NM_004751 | GCNT3 | 1 |
| hsa-miR-3622 NM_004751 | GCNT3 | 1 |
| hsa-miR-3648 NM_004751 | GCNT3 | 1 |
| hsa-miR-3652 NM_004751 | GCNT3 | 1 |
| hsa-miR-3661 NM_004751 | GCNT3 | 1 |
| hsa-miR-3663 NM_004751 | GCNT3 | 1 |
| hsa-miR-3665 NM_004751 | GCNT3 | 1 |
| hsa-miR-368C NM_004751 | GCNT3 | 1 |
| hsa-miR-368C NM_004751 | GCNT3 | 1 |
| hsa-miR-3685 NM_004751 | GCNT3 | 1 |

|                        |       |   |
|------------------------|-------|---|
| hsa-miR-3689 NM_004751 | GCNT3 | 1 |
| hsa-miR-3691 NM_004751 | GCNT3 | 1 |
| hsa-miR-3714 NM_004751 | GCNT3 | 1 |
| hsa-miR-318C NM_004751 | GCNT3 | 1 |
| hsa-miR-3689 NM_004751 | GCNT3 | 1 |
| hsa-miR-3689 NM_004751 | GCNT3 | 1 |
| hsa-miR-3913 NM_004751 | GCNT3 | 1 |
| hsa-miR-676- NM_004751 | GCNT3 | 1 |
| hsa-miR-3929 NM_004751 | GCNT3 | 1 |
| hsa-miR-3934 NM_004751 | GCNT3 | 1 |
| hsa-miR-3936 NM_004751 | GCNT3 | 1 |
| hsa-miR-3937 NM_004751 | GCNT3 | 1 |
| hsa-miR-394C NM_004751 | GCNT3 | 1 |
| hsa-miR-3944 NM_004751 | GCNT3 | 1 |
| hsa-miR-642b NM_004751 | GCNT3 | 1 |
| hsa-miR-1268 NM_004751 | GCNT3 | 1 |
| hsa-miR-442C NM_004751 | GCNT3 | 1 |
| hsa-miR-4429 NM_004751 | GCNT3 | 1 |
| hsa-miR-443C NM_004751 | GCNT3 | 1 |
| hsa-miR-4436 NM_004751 | GCNT3 | 1 |
| hsa-miR-4437 NM_004751 | GCNT3 | 1 |
| hsa-miR-4437 NM_004751 | GCNT3 | 1 |
| hsa-miR-4439 NM_004751 | GCNT3 | 1 |
| hsa-miR-4446 NM_004751 | GCNT3 | 1 |
| hsa-miR-4447 NM_004751 | GCNT3 | 1 |
| hsa-miR-445C NM_004751 | GCNT3 | 1 |
| hsa-miR-4452 NM_004751 | GCNT3 | 1 |
| hsa-miR-4458 NM_004751 | GCNT3 | 1 |
| hsa-miR-4465 NM_004751 | GCNT3 | 1 |
| hsa-miR-4472 NM_004751 | GCNT3 | 1 |
| hsa-miR-4478 NM_004751 | GCNT3 | 1 |
| hsa-miR-3689 NM_004751 | GCNT3 | 1 |
| hsa-miR-3689 NM_004751 | GCNT3 | 1 |
| hsa-miR-4481 NM_004751 | GCNT3 | 1 |
| hsa-miR-4484 NM_004751 | GCNT3 | 1 |
| hsa-miR-4485 NM_004751 | GCNT3 | 1 |
| hsa-miR-4486 NM_004751 | GCNT3 | 1 |
| hsa-miR-4492 NM_004751 | GCNT3 | 1 |
| hsa-miR-4497 NM_004751 | GCNT3 | 1 |
| hsa-miR-4498 NM_004751 | GCNT3 | 1 |
| hsa-miR-4498 NM_004751 | GCNT3 | 1 |
| hsa-miR-4498 NM_004751 | GCNT3 | 1 |
| hsa-miR-4502 NM_004751 | GCNT3 | 1 |
| hsa-miR-4507 NM_004751 | GCNT3 | 1 |
| hsa-miR-4507 NM_004751 | GCNT3 | 1 |
| hsa-miR-4508 NM_004751 | GCNT3 | 1 |
| hsa-miR-4511 NM_004751 | GCNT3 | 1 |
| hsa-miR-4512 NM_004751 | GCNT3 | 1 |
| hsa-miR-4514 NM_004751 | GCNT3 | 1 |
| hsa-miR-452C NM_004751 | GCNT3 | 1 |
| hsa-miR-4522 NM_004751 | GCNT3 | 1 |
| hsa-miR-4522 NM_004751 | GCNT3 | 1 |
| hsa-miR-4524 NM_004751 | GCNT3 | 1 |
| hsa-miR-4525 NM_004751 | GCNT3 | 1 |
| hsa-miR-453C NM_004751 | GCNT3 | 1 |
| hsa-miR-4533 NM_004751 | GCNT3 | 1 |
| hsa-miR-1587 NM_004751 | GCNT3 | 1 |
| hsa-miR-1587 NM_004751 | GCNT3 | 1 |
| hsa-miR-1587 NM_004751 | GCNT3 | 1 |
| hsa-miR-4539 NM_004751 | GCNT3 | 1 |
| hsa-miR-4539 NM_004751 | GCNT3 | 1 |
| hsa-miR-454C NM_004751 | GCNT3 | 1 |
| hsa-miR-3975 NM_004751 | GCNT3 | 1 |
| hsa-miR-4632 NM_004751 | GCNT3 | 1 |
| hsa-miR-4641 NM_004751 | GCNT3 | 1 |
| hsa-miR-4645 NM_004751 | GCNT3 | 1 |
| hsa-miR-4647 NM_004751 | GCNT3 | 1 |
| hsa-miR-4662 NM_004751 | GCNT3 | 1 |
| hsa-miR-4673 NM_004751 | GCNT3 | 1 |
| hsa-miR-4674 NM_004751 | GCNT3 | 1 |
| hsa-miR-1343 NM_004751 | GCNT3 | 1 |
| hsa-miR-1343 NM_004751 | GCNT3 | 1 |
| hsa-miR-4688 NM_004751 | GCNT3 | 1 |
| hsa-miR-4697 NM_004751 | GCNT3 | 1 |
| hsa-miR-4697 NM_004751 | GCNT3 | 1 |
| hsa-miR-4701 NM_004751 | GCNT3 | 1 |
| hsa-miR-4701 NM_004751 | GCNT3 | 1 |
| hsa-miR-4707 NM_004751 | GCNT3 | 1 |
| hsa-miR-471C NM_004751 | GCNT3 | 1 |
| hsa-miR-4711 NM_004751 | GCNT3 | 1 |
| hsa-miR-4713 NM_004751 | GCNT3 | 1 |
| hsa-miR-4713 NM_004751 | GCNT3 | 1 |
| hsa-miR-4717 NM_004751 | GCNT3 | 1 |
| hsa-miR-4717 NM_004751 | GCNT3 | 1 |
| hsa-miR-472C NM_004751 | GCNT3 | 1 |
| hsa-miR-4721 NM_004751 | GCNT3 | 1 |
| hsa-miR-4721 NM_004751 | GCNT3 | 1 |
| hsa-miR-4723 NM_004751 | GCNT3 | 1 |
| hsa-miR-4723 NM_004751 | GCNT3 | 1 |
| hsa-miR-4724 NM_004751 | GCNT3 | 1 |
| hsa-miR-4725 NM_004751 | GCNT3 | 1 |
| hsa-miR-4725 NM_004751 | GCNT3 | 1 |
| hsa-miR-4727 NM_004751 | GCNT3 | 1 |
| hsa-miR-4727 NM_004751 | GCNT3 | 1 |







|                         |        |            |
|-------------------------|--------|------------|
| hsa-miR-6858 NM_004751  | GCNT3  | 1          |
| hsa-miR-6859 NM_004751  | GCNT3  | 1          |
| hsa-miR-6861 NM_004751  | GCNT3  | 1          |
| hsa-miR-6862 NM_004751  | GCNT3  | 1          |
| hsa-miR-6865 NM_004751  | GCNT3  | 1          |
| hsa-miR-6871 NM_004751  | GCNT3  | 1          |
| hsa-miR-6872 NM_004751  | GCNT3  | 1          |
| hsa-miR-6875 NM_004751  | GCNT3  | 1          |
| hsa-miR-6876 NM_004751  | GCNT3  | 1          |
| hsa-miR-6877 NM_004751  | GCNT3  | 1          |
| hsa-miR-6878 NM_004751  | GCNT3  | 1          |
| hsa-miR-6879 NM_004751  | GCNT3  | 1          |
| hsa-miR-6881 NM_004751  | GCNT3  | 1          |
| hsa-miR-6882 NM_004751  | GCNT3  | 1          |
| hsa-miR-6884 NM_004751  | GCNT3  | 1          |
| hsa-miR-6884 NM_004751  | GCNT3  | 1          |
| hsa-miR-6890 NM_004751  | GCNT3  | 1          |
| hsa-miR-6891 NM_004751  | GCNT3  | 1          |
| hsa-miR-6892 NM_004751  | GCNT3  | 1          |
| hsa-miR-6895 NM_004751  | GCNT3  | 1          |
| hsa-miR-6895 NM_004751  | GCNT3  | 1          |
| hsa-miR-7106 NM_004751  | GCNT3  | 1          |
| hsa-miR-7107 NM_004751  | GCNT3  | 1          |
| hsa-miR-7107 NM_004751  | GCNT3  | 1          |
| hsa-miR-7111 NM_004751  | GCNT3  | 1          |
| hsa-miR-7113 NM_004751  | GCNT3  | 1          |
| hsa-miR-7150 NM_004751  | GCNT3  | 1          |
| hsa-miR-7152 NM_004751  | GCNT3  | 1          |
| hsa-miR-7152 NM_004751  | GCNT3  | 1          |
| hsa-miR-7154 NM_004751  | GCNT3  | 1          |
| hsa-miR-7156 NM_004751  | GCNT3  | 1          |
| hsa-miR-7515 NM_004751  | GCNT3  | 1          |
| hsa-miR-4433 NM_004751  | GCNT3  | 1          |
| hsa-miR-1273 NM_004751  | GCNT3  | 1          |
| hsa-miR-1273 NM_004751  | GCNT3  | 1          |
| hsa-miR-7848 NM_004751  | GCNT3  | 1          |
| hsa-miR-7850 NM_004751  | GCNT3  | 1          |
| hsa-miR-548t NM_004751  | GCNT3  | 1          |
| hsa-miR-7975 NM_004751  | GCNT3  | 1          |
| hsa-miR-8053 NM_004751  | GCNT3  | 1          |
| hsa-miR-8054 NM_004751  | GCNT3  | 1          |
| hsa-miR-8069 NM_004751  | GCNT3  | 1          |
| hsa-miR-8071 NM_004751  | GCNT3  | 1          |
| hsa-miR-8071 NM_004751  | GCNT3  | 1          |
| hsa-miR-8089 NM_004751  | GCNT3  | 1          |
| hsa-miR-9899 NM_004751  | GCNT3  | 1          |
| hsa-miR-9901 NM_004751  | GCNT3  | 1          |
| hsa-miR-1039 NM_004751  | GCNT3  | 1          |
| hsa-miR-1040 NM_004751  | GCNT3  | 1          |
| hsa-miR-1040 NM_004751  | GCNT3  | 1          |
| hsa-miR-1040 NM_004751  | GCNT3  | 1          |
| hsa-miR-1052 NM_004751  | GCNT3  | 1          |
| hsa-miR-1052 NM_004751  | GCNT3  | 1          |
| hsa-miR-1118 NM_004751  | GCNT3  | 1          |
| hsa-miR-3059 NM_004751  | GCNT3  | 1          |
| hsa-miR-1212 NM_004751  | GCNT3  | 1          |
| hsa-miR-1212 NM_004751  | GCNT3  | 1          |
| hsa-miR-4271 NM_004887  | CXCL14 | 0.96153846 |
| hsa-miR-5187 NM_004887  | CXCL14 | 0.96153846 |
| hsa-miR-3150 NM_004887  | CXCL14 | 0.96923077 |
| hsa-miR-34a-1 NM_004887 | CXCL14 | 0.97435897 |
| hsa-miR-27b-1 NM_004887 | CXCL14 | 0.97435897 |
| hsa-miR-376a NM_004887  | CXCL14 | 0.97435897 |
| hsa-miR-3120 NM_004887  | CXCL14 | 0.97435897 |
| hsa-miR-6774 NM_004887  | CXCL14 | 0.98076923 |
| hsa-let-7b-5p NM_004887 | CXCL14 | 1          |
| hsa-let-7c-5p NM_004887 | CXCL14 | 1          |
| hsa-miR-92a-1 NM_004887 | CXCL14 | 1          |
| hsa-miR-99a-1 NM_004887 | CXCL14 | 1          |
| hsa-miR-105-1 NM_004887 | CXCL14 | 1          |
| hsa-miR-30d-1 NM_004887 | CXCL14 | 1          |
| hsa-miR-221-1 NM_004887 | CXCL14 | 1          |
| hsa-miR-23b-1 NM_004887 | CXCL14 | 1          |
| hsa-miR-130a NM_004887  | CXCL14 | 1          |
| hsa-miR-143-1 NM_004887 | CXCL14 | 1          |
| hsa-miR-9-5p NM_004887  | CXCL14 | 1          |
| hsa-miR-134-1 NM_004887 | CXCL14 | 1          |
| hsa-miR-149-1 NM_004887 | CXCL14 | 1          |
| hsa-miR-150-1 NM_004887 | CXCL14 | 1          |
| hsa-miR-106b NM_004887  | CXCL14 | 1          |
| hsa-miR-296-1 NM_004887 | CXCL14 | 1          |
| hsa-miR-130e NM_004887  | CXCL14 | 1          |
| hsa-miR-365a NM_004887  | CXCL14 | 1          |
| hsa-miR-331-1 NM_004887 | CXCL14 | 1          |
| hsa-miR-484 NM_004887   | CXCL14 | 1          |
| hsa-miR-485-1 NM_004887 | CXCL14 | 1          |
| hsa-miR-490-1 NM_004887 | CXCL14 | 1          |
| hsa-miR-491-1 NM_004887 | CXCL14 | 1          |
| hsa-miR-202-1 NM_004887 | CXCL14 | 1          |
| hsa-miR-520f NM_004887  | CXCL14 | 1          |

|              |           |        |   |
|--------------|-----------|--------|---|
| hsa-miR-518f | NM_004887 | CXCL14 | 1 |
| hsa-miR-517- | NM_004887 | CXCL14 | 1 |
| hsa-miR-508- | NM_004887 | CXCL14 | 1 |
| hsa-miR-510- | NM_004887 | CXCL14 | 1 |
| hsa-miR-556- | NM_004887 | CXCL14 | 1 |
| hsa-miR-567  | NM_004887 | CXCL14 | 1 |
| hsa-miR-595  | NM_004887 | CXCL14 | 1 |
| hsa-miR-614  | NM_004887 | CXCL14 | 1 |
| hsa-miR-622  | NM_004887 | CXCL14 | 1 |
| hsa-miR-623  | NM_004887 | CXCL14 | 1 |
| hsa-miR-411- | NM_004887 | CXCL14 | 1 |
| hsa-miR-660- | NM_004887 | CXCL14 | 1 |
| hsa-miR-1224 | NM_004887 | CXCL14 | 1 |
| hsa-miR-1468 | NM_004887 | CXCL14 | 1 |
| hsa-miR-1301 | NM_004887 | CXCL14 | 1 |
| hsa-miR-1185 | NM_004887 | CXCL14 | 1 |
| hsa-miR-769- | NM_004887 | CXCL14 | 1 |
| hsa-miR-766- | NM_004887 | CXCL14 | 1 |
| hsa-miR-1185 | NM_004887 | CXCL14 | 1 |
| hsa-miR-764  | NM_004887 | CXCL14 | 1 |
| hsa-miR-298  | NM_004887 | CXCL14 | 1 |
| hsa-miR-298  | NM_004887 | CXCL14 | 1 |
| hsa-miR-892b | NM_004887 | CXCL14 | 1 |
| hsa-miR-875- | NM_004887 | CXCL14 | 1 |
| hsa-miR-147b | NM_004887 | CXCL14 | 1 |
| hsa-miR-744- | NM_004887 | CXCL14 | 1 |
| hsa-miR-877- | NM_004887 | CXCL14 | 1 |
| hsa-miR-301b | NM_004887 | CXCL14 | 1 |
| hsa-miR-208b | NM_004887 | CXCL14 | 1 |
| hsa-miR-921  | NM_004887 | CXCL14 | 1 |
| hsa-miR-936  | NM_004887 | CXCL14 | 1 |
| hsa-miR-1182 | NM_004887 | CXCL14 | 1 |
| hsa-miR-1236 | NM_004887 | CXCL14 | 1 |
| hsa-miR-1236 | NM_004887 | CXCL14 | 1 |
| hsa-miR-1205 | NM_004887 | CXCL14 | 1 |
| hsa-miR-1286 | NM_004887 | CXCL14 | 1 |
| hsa-miR-1905 | NM_004887 | CXCL14 | 1 |
| hsa-miR-1911 | NM_004887 | CXCL14 | 1 |
| hsa-miR-1915 | NM_004887 | CXCL14 | 1 |
| hsa-miR-1976 | NM_004887 | CXCL14 | 1 |
| hsa-miR-3126 | NM_004887 | CXCL14 | 1 |
| hsa-miR-3126 | NM_004887 | CXCL14 | 1 |
| hsa-miR-3125 | NM_004887 | CXCL14 | 1 |
| hsa-miR-3132 | NM_004887 | CXCL14 | 1 |
| hsa-miR-378b | NM_004887 | CXCL14 | 1 |
| hsa-miR-3135 | NM_004887 | CXCL14 | 1 |
| hsa-miR-3141 | NM_004887 | CXCL14 | 1 |
| hsa-miR-3155 | NM_004887 | CXCL14 | 1 |
| hsa-miR-3155 | NM_004887 | CXCL14 | 1 |
| hsa-miR-3158 | NM_004887 | CXCL14 | 1 |
| hsa-miR-3186 | NM_004887 | CXCL14 | 1 |
| hsa-miR-3198 | NM_004887 | CXCL14 | 1 |
| hsa-miR-4312 | NM_004887 | CXCL14 | 1 |
| hsa-miR-4321 | NM_004887 | CXCL14 | 1 |
| hsa-miR-4260 | NM_004887 | CXCL14 | 1 |
| hsa-miR-4253 | NM_004887 | CXCL14 | 1 |
| hsa-miR-4251 | NM_004887 | CXCL14 | 1 |
| hsa-miR-4277 | NM_004887 | CXCL14 | 1 |
| hsa-miR-4278 | NM_004887 | CXCL14 | 1 |
| hsa-miR-3605 | NM_004887 | CXCL14 | 1 |
| hsa-miR-3714 | NM_004887 | CXCL14 | 1 |
| hsa-miR-3685 | NM_004887 | CXCL14 | 1 |
| hsa-miR-3925 | NM_004887 | CXCL14 | 1 |
| hsa-miR-3936 | NM_004887 | CXCL14 | 1 |
| hsa-miR-3937 | NM_004887 | CXCL14 | 1 |
| hsa-miR-3945 | NM_004887 | CXCL14 | 1 |
| hsa-miR-3945 | NM_004887 | CXCL14 | 1 |
| hsa-miR-642b | NM_004887 | CXCL14 | 1 |
| hsa-miR-378g | NM_004887 | CXCL14 | 1 |
| hsa-miR-4435 | NM_004887 | CXCL14 | 1 |
| hsa-miR-4445 | NM_004887 | CXCL14 | 1 |
| hsa-miR-4455 | NM_004887 | CXCL14 | 1 |
| hsa-miR-4474 | NM_004887 | CXCL14 | 1 |
| hsa-miR-3685 | NM_004887 | CXCL14 | 1 |
| hsa-miR-3685 | NM_004887 | CXCL14 | 1 |
| hsa-miR-4510 | NM_004887 | CXCL14 | 1 |
| hsa-miR-4525 | NM_004887 | CXCL14 | 1 |
| hsa-miR-4534 | NM_004887 | CXCL14 | 1 |
| hsa-miR-4645 | NM_004887 | CXCL14 | 1 |
| hsa-miR-4656 | NM_004887 | CXCL14 | 1 |
| hsa-miR-4660 | NM_004887 | CXCL14 | 1 |
| hsa-miR-4667 | NM_004887 | CXCL14 | 1 |
| hsa-miR-4675 | NM_004887 | CXCL14 | 1 |
| hsa-miR-4676 | NM_004887 | CXCL14 | 1 |
| hsa-miR-4685 | NM_004887 | CXCL14 | 1 |
| hsa-miR-4700 | NM_004887 | CXCL14 | 1 |
| hsa-miR-4704 | NM_004887 | CXCL14 | 1 |
| hsa-miR-4707 | NM_004887 | CXCL14 | 1 |
| hsa-miR-4712 | NM_004887 | CXCL14 | 1 |
| hsa-miR-4712 | NM_004887 | CXCL14 | 1 |
| hsa-miR-4712 | NM_004887 | CXCL14 | 1 |
| hsa-miR-4714 | NM_004887 | CXCL14 | 1 |
| hsa-miR-4716 | NM_004887 | CXCL14 | 1 |
| hsa-miR-4716 | NM_004887 | CXCL14 | 1 |

|                        |        |            |
|------------------------|--------|------------|
| hsa-miR-4717 NM_004887 | CXCL14 | 1          |
| hsa-miR-4728 NM_004887 | CXCL14 | 1          |
| hsa-miR-4731 NM_004887 | CXCL14 | 1          |
| hsa-miR-4733 NM_004887 | CXCL14 | 1          |
| hsa-miR-4747 NM_004887 | CXCL14 | 1          |
| hsa-miR-4747 NM_004887 | CXCL14 | 1          |
| hsa-miR-4768 NM_004887 | CXCL14 | 1          |
| hsa-miR-4769 NM_004887 | CXCL14 | 1          |
| hsa-miR-4781 NM_004887 | CXCL14 | 1          |
| hsa-miR-2467 NM_004887 | CXCL14 | 1          |
| hsa-miR-2467 NM_004887 | CXCL14 | 1          |
| hsa-miR-5004 NM_004887 | CXCL14 | 1          |
| hsa-miR-5006 NM_004887 | CXCL14 | 1          |
| hsa-miR-5090 NM_004887 | CXCL14 | 1          |
| hsa-miR-5189 NM_004887 | CXCL14 | 1          |
| hsa-miR-664b NM_004887 | CXCL14 | 1          |
| hsa-miR-5591 NM_004887 | CXCL14 | 1          |
| hsa-miR-5683 NM_004887 | CXCL14 | 1          |
| hsa-miR-5698 NM_004887 | CXCL14 | 1          |
| hsa-miR-5698 NM_004887 | CXCL14 | 1          |
| hsa-miR-5739 NM_004887 | CXCL14 | 1          |
| hsa-miR-6069 NM_004887 | CXCL14 | 1          |
| hsa-miR-6076 NM_004887 | CXCL14 | 1          |
| hsa-miR-6085 NM_004887 | CXCL14 | 1          |
| hsa-miR-6086 NM_004887 | CXCL14 | 1          |
| hsa-miR-6129 NM_004887 | CXCL14 | 1          |
| hsa-miR-6500 NM_004887 | CXCL14 | 1          |
| hsa-miR-6501 NM_004887 | CXCL14 | 1          |
| hsa-miR-6510 NM_004887 | CXCL14 | 1          |
| hsa-miR-6715 NM_004887 | CXCL14 | 1          |
| hsa-miR-6721 NM_004887 | CXCL14 | 1          |
| hsa-miR-6732 NM_004887 | CXCL14 | 1          |
| hsa-miR-6734 NM_004887 | CXCL14 | 1          |
| hsa-miR-6744 NM_004887 | CXCL14 | 1          |
| hsa-miR-6749 NM_004887 | CXCL14 | 1          |
| hsa-miR-6754 NM_004887 | CXCL14 | 1          |
| hsa-miR-6754 NM_004887 | CXCL14 | 1          |
| hsa-miR-6758 NM_004887 | CXCL14 | 1          |
| hsa-miR-6759 NM_004887 | CXCL14 | 1          |
| hsa-miR-6761 NM_004887 | CXCL14 | 1          |
| hsa-miR-6762 NM_004887 | CXCL14 | 1          |
| hsa-miR-6770 NM_004887 | CXCL14 | 1          |
| hsa-miR-6771 NM_004887 | CXCL14 | 1          |
| hsa-miR-6773 NM_004887 | CXCL14 | 1          |
| hsa-miR-6776 NM_004887 | CXCL14 | 1          |
| hsa-miR-6777 NM_004887 | CXCL14 | 1          |
| hsa-miR-6779 NM_004887 | CXCL14 | 1          |
| hsa-miR-6785 NM_004887 | CXCL14 | 1          |
| hsa-miR-6792 NM_004887 | CXCL14 | 1          |
| hsa-miR-6806 NM_004887 | CXCL14 | 1          |
| hsa-miR-6807 NM_004887 | CXCL14 | 1          |
| hsa-miR-6810 NM_004887 | CXCL14 | 1          |
| hsa-miR-6810 NM_004887 | CXCL14 | 1          |
| hsa-miR-6818 NM_004887 | CXCL14 | 1          |
| hsa-miR-6825 NM_004887 | CXCL14 | 1          |
| hsa-miR-6832 NM_004887 | CXCL14 | 1          |
| hsa-miR-6838 NM_004887 | CXCL14 | 1          |
| hsa-miR-6846 NM_004887 | CXCL14 | 1          |
| hsa-miR-6847 NM_004887 | CXCL14 | 1          |
| hsa-miR-6847 NM_004887 | CXCL14 | 1          |
| hsa-miR-6851 NM_004887 | CXCL14 | 1          |
| hsa-miR-6852 NM_004887 | CXCL14 | 1          |
| hsa-miR-6769 NM_004887 | CXCL14 | 1          |
| hsa-miR-6860 NM_004887 | CXCL14 | 1          |
| hsa-miR-6867 NM_004887 | CXCL14 | 1          |
| hsa-miR-6870 NM_004887 | CXCL14 | 1          |
| hsa-miR-6873 NM_004887 | CXCL14 | 1          |
| hsa-miR-6876 NM_004887 | CXCL14 | 1          |
| hsa-miR-6886 NM_004887 | CXCL14 | 1          |
| hsa-miR-6887 NM_004887 | CXCL14 | 1          |
| hsa-miR-6891 NM_004887 | CXCL14 | 1          |
| hsa-miR-7109 NM_004887 | CXCL14 | 1          |
| hsa-miR-7109 NM_004887 | CXCL14 | 1          |
| hsa-miR-7153 NM_004887 | CXCL14 | 1          |
| hsa-miR-7843 NM_004887 | CXCL14 | 1          |
| hsa-miR-1273 NM_004887 | CXCL14 | 1          |
| hsa-miR-7849 NM_004887 | CXCL14 | 1          |
| hsa-miR-7855 NM_004887 | CXCL14 | 1          |
| hsa-miR-8054 NM_004887 | CXCL14 | 1          |
| hsa-miR-8055 NM_004887 | CXCL14 | 1          |
| hsa-miR-8064 NM_004887 | CXCL14 | 1          |
| hsa-miR-8078 NM_004887 | CXCL14 | 1          |
| hsa-miR-8085 NM_004887 | CXCL14 | 1          |
| hsa-miR-8087 NM_004887 | CXCL14 | 1          |
| hsa-miR-8089 NM_004887 | CXCL14 | 1          |
| hsa-miR-1040 NM_004887 | CXCL14 | 1          |
| hsa-miR-1052 NM_004887 | CXCL14 | 1          |
| hsa-miR-1211 NM_004887 | CXCL14 | 1          |
| hsa-miR-1211 NM_004887 | CXCL14 | 1          |
| hsa-miR-1212 NM_004887 | CXCL14 | 1          |
| hsa-miR-572 NM_005564  | LCN2   | 0.96153846 |
| hsa-miR-637 NM_005564  | LCN2   | 1          |
| hsa-miR-891a NM_005564 | LCN2   | 1          |
| hsa-miR-1226 NM_005564 | LCN2   | 1          |

|                         |      |            |
|-------------------------|------|------------|
| hsa-miR-1275 NM_005564  | LCN2 | 1          |
| hsa-miR-3162 NM_005564  | LCN2 | 1          |
| hsa-miR-3191 NM_005564  | LCN2 | 1          |
| hsa-miR-4318 NM_005564  | LCN2 | 1          |
| hsa-miR-4267 NM_005564  | LCN2 | 1          |
| hsa-miR-4463 NM_005564  | LCN2 | 1          |
| hsa-miR-451C NM_005564  | LCN2 | 1          |
| hsa-miR-4665 NM_005564  | LCN2 | 1          |
| hsa-miR-4745 NM_005564  | LCN2 | 1          |
| hsa-miR-5591 NM_005564  | LCN2 | 1          |
| hsa-miR-6729 NM_005564  | LCN2 | 1          |
| hsa-miR-673C NM_005564  | LCN2 | 1          |
| hsa-miR-6736 NM_005564  | LCN2 | 1          |
| hsa-miR-6742 NM_005564  | LCN2 | 1          |
| hsa-miR-6782 NM_005564  | LCN2 | 1          |
| hsa-miR-3692 NM_005623  | CCL8 | 0.97435897 |
| hsa-miR-365t NM_005623  | CCL8 | 0.98076923 |
| hsa-miR-28-5j NM_005623 | CCL8 | 1          |
| hsa-miR-197-1 NM_005623 | CCL8 | 1          |
| hsa-miR-191-1 NM_005623 | CCL8 | 1          |
| hsa-miR-150-1 NM_005623 | CCL8 | 1          |
| hsa-miR-99b-1 NM_005623 | CCL8 | 1          |
| hsa-miR-500a NM_005623  | CCL8 | 1          |
| hsa-miR-502-1 NM_005623 | CCL8 | 1          |
| hsa-miR-509-1 NM_005623 | CCL8 | 1          |
| hsa-miR-550a NM_005623  | CCL8 | 1          |
| hsa-miR-603 NM_005623   | CCL8 | 1          |
| hsa-miR-629-1 NM_005623 | CCL8 | 1          |
| hsa-miR-151b NM_005623  | CCL8 | 1          |
| hsa-miR-936 NM_005623   | CCL8 | 1          |
| hsa-miR-1225 NM_005623  | CCL8 | 1          |
| hsa-miR-1231 NM_005623  | CCL8 | 1          |
| hsa-miR-1208 NM_005623  | CCL8 | 1          |
| hsa-miR-1268 NM_005623  | CCL8 | 1          |
| hsa-miR-313C NM_005623  | CCL8 | 1          |
| hsa-miR-3137 NM_005623  | CCL8 | 1          |
| hsa-miR-3176 NM_005623  | CCL8 | 1          |
| hsa-miR-3177 NM_005623  | CCL8 | 1          |
| hsa-miR-4323 NM_005623  | CCL8 | 1          |
| hsa-miR-4327 NM_005623  | CCL8 | 1          |
| hsa-miR-4284 NM_005623  | CCL8 | 1          |
| hsa-miR-367C NM_005623  | CCL8 | 1          |
| hsa-miR-3681 NM_005623  | CCL8 | 1          |
| hsa-miR-3689 NM_005623  | CCL8 | 1          |
| hsa-miR-3714 NM_005623  | CCL8 | 1          |
| hsa-miR-3936 NM_005623  | CCL8 | 1          |
| hsa-miR-394C NM_005623  | CCL8 | 1          |
| hsa-miR-550b NM_005623  | CCL8 | 1          |
| hsa-miR-1268 NM_005623  | CCL8 | 1          |
| hsa-miR-4462 NM_005623  | CCL8 | 1          |
| hsa-miR-452C NM_005623  | CCL8 | 1          |
| hsa-miR-4538 NM_005623  | CCL8 | 1          |
| hsa-miR-4689 NM_005623  | CCL8 | 1          |
| hsa-miR-4707 NM_005623  | CCL8 | 1          |
| hsa-miR-4718 NM_005623  | CCL8 | 1          |
| hsa-miR-4722 NM_005623  | CCL8 | 1          |
| hsa-miR-4726 NM_005623  | CCL8 | 1          |
| hsa-miR-4733 NM_005623  | CCL8 | 1          |
| hsa-miR-4747 NM_005623  | CCL8 | 1          |
| hsa-miR-4748 NM_005623  | CCL8 | 1          |
| hsa-miR-4754 NM_005623  | CCL8 | 1          |
| hsa-miR-4769 NM_005623  | CCL8 | 1          |
| hsa-miR-4773 NM_005623  | CCL8 | 1          |
| hsa-miR-5579 NM_005623  | CCL8 | 1          |
| hsa-miR-5698 NM_005623  | CCL8 | 1          |
| hsa-miR-5699 NM_005623  | CCL8 | 1          |
| hsa-miR-5787 NM_005623  | CCL8 | 1          |
| hsa-miR-6086 NM_005623  | CCL8 | 1          |
| hsa-miR-6129 NM_005623  | CCL8 | 1          |
| hsa-miR-6165 NM_005623  | CCL8 | 1          |
| hsa-miR-6722 NM_005623  | CCL8 | 1          |
| hsa-miR-6734 NM_005623  | CCL8 | 1          |
| hsa-miR-6749 NM_005623  | CCL8 | 1          |
| hsa-miR-6751 NM_005623  | CCL8 | 1          |
| hsa-miR-6763 NM_005623  | CCL8 | 1          |
| hsa-miR-6767 NM_005623  | CCL8 | 1          |
| hsa-miR-6772 NM_005623  | CCL8 | 1          |
| hsa-miR-6775 NM_005623  | CCL8 | 1          |
| hsa-miR-678C NM_005623  | CCL8 | 1          |
| hsa-miR-6788 NM_005623  | CCL8 | 1          |
| hsa-miR-6796 NM_005623  | CCL8 | 1          |
| hsa-miR-6799 NM_005623  | CCL8 | 1          |
| hsa-miR-6808 NM_005623  | CCL8 | 1          |
| hsa-miR-6824 NM_005623  | CCL8 | 1          |
| hsa-miR-6846 NM_005623  | CCL8 | 1          |
| hsa-miR-6769 NM_005623  | CCL8 | 1          |
| hsa-miR-6862 NM_005623  | CCL8 | 1          |
| hsa-miR-687C NM_005623  | CCL8 | 1          |
| hsa-miR-6873 NM_005623  | CCL8 | 1          |
| hsa-miR-6881 NM_005623  | CCL8 | 1          |
| hsa-miR-6893 NM_005623  | CCL8 | 1          |
| hsa-miR-6894 NM_005623  | CCL8 | 1          |
| hsa-miR-7106 NM_005623  | CCL8 | 1          |
| hsa-miR-715C NM_005623  | CCL8 | 1          |

|                         |       |            |
|-------------------------|-------|------------|
| hsa-miR-7152 NM_005623  | CCL8  | 1          |
| hsa-miR-7156 NM_005623  | CCL8  | 1          |
| hsa-miR-7851 NM_005623  | CCL8  | 1          |
| hsa-miR-7855 NM_005623  | CCL8  | 1          |
| hsa-miR-8085 NM_005623  | CCL8  | 1          |
| hsa-miR-1140 NM_005623  | CCL8  | 1          |
| hsa-miR-1211 NM_005623  | CCL8  | 1          |
| hsa-miR-5124 NM_005980  | S100P | 0.96153846 |
| hsa-miR-4283 NM_005980  | S100P | 0.96153846 |
| hsa-miR-950C NM_005980  | S100P | 0.96153846 |
| hsa-miR-394C NM_005980  | S100P | 0.97435897 |
| hsa-miR-23a-1 NM_005980 | S100P | 0.98076923 |
| hsa-miR-1227 NM_005980  | S100P | 0.98076923 |
| hsa-miR-92a-1 NM_005980 | S100P | 1          |
| hsa-miR-198 NM_005980   | S100P | 1          |
| hsa-miR-202-1 NM_005980 | S100P | 1          |
| hsa-miR-637 NM_005980   | S100P | 1          |
| hsa-miR-1225 NM_005980  | S100P | 1          |
| hsa-miR-1228 NM_005980  | S100P | 1          |
| hsa-miR-1233 NM_005980  | S100P | 1          |
| hsa-miR-2278 NM_005980  | S100P | 1          |
| hsa-miR-3132 NM_005980  | S100P | 1          |
| hsa-miR-3151 NM_005980  | S100P | 1          |
| hsa-miR-3152 NM_005980  | S100P | 1          |
| hsa-miR-3155 NM_005980  | S100P | 1          |
| hsa-miR-3197 NM_005980  | S100P | 1          |
| hsa-miR-4265 NM_005980  | S100P | 1          |
| hsa-miR-362C NM_005980  | S100P | 1          |
| hsa-miR-3665 NM_005980  | S100P | 1          |
| hsa-miR-3907 NM_005980  | S100P | 1          |
| hsa-miR-3917 NM_005980  | S100P | 1          |
| hsa-miR-3928 NM_005980  | S100P | 1          |
| hsa-miR-550b NM_005980  | S100P | 1          |
| hsa-miR-4425 NM_005980  | S100P | 1          |
| hsa-miR-4448 NM_005980  | S100P | 1          |
| hsa-miR-4524 NM_005980  | S100P | 1          |
| hsa-miR-1587 NM_005980  | S100P | 1          |
| hsa-miR-4638 NM_005980  | S100P | 1          |
| hsa-miR-4658 NM_005980  | S100P | 1          |
| hsa-miR-4717 NM_005980  | S100P | 1          |
| hsa-miR-4723 NM_005980  | S100P | 1          |
| hsa-miR-4748 NM_005980  | S100P | 1          |
| hsa-miR-4758 NM_005980  | S100P | 1          |
| hsa-miR-4786 NM_005980  | S100P | 1          |
| hsa-miR-5008 NM_005980  | S100P | 1          |
| hsa-miR-4524 NM_005980  | S100P | 1          |
| hsa-miR-6075 NM_005980  | S100P | 1          |
| hsa-miR-6081 NM_005980  | S100P | 1          |
| hsa-miR-6085 NM_005980  | S100P | 1          |
| hsa-miR-650C NM_005980  | S100P | 1          |
| hsa-miR-6508 NM_005980  | S100P | 1          |
| hsa-miR-6728 NM_005980  | S100P | 1          |
| hsa-miR-6736 NM_005980  | S100P | 1          |
| hsa-miR-679C NM_005980  | S100P | 1          |
| hsa-miR-6793 NM_005980  | S100P | 1          |
| hsa-miR-6801 NM_005980  | S100P | 1          |
| hsa-miR-681C NM_005980  | S100P | 1          |
| hsa-miR-6824 NM_005980  | S100P | 1          |
| hsa-miR-6827 NM_005980  | S100P | 1          |
| hsa-miR-6834 NM_005980  | S100P | 1          |
| hsa-miR-678C NM_005980  | S100P | 1          |
| hsa-miR-6842 NM_005980  | S100P | 1          |
| hsa-miR-6862 NM_005980  | S100P | 1          |
| hsa-miR-6885 NM_005980  | S100P | 1          |
| hsa-miR-7843 NM_005980  | S100P | 1          |
| hsa-miR-8057 NM_005980  | S100P | 1          |
| hsa-miR-6525 NM_005980  | S100P | 1          |
| hsa-miR-3187 NM_006103  | WFDC2 | 0.96153846 |
| hsa-miR-4747 NM_006103  | WFDC2 | 0.96153846 |
| hsa-miR-6124 NM_006103  | WFDC2 | 0.96153846 |
| hsa-miR-6833 NM_006103  | WFDC2 | 0.96153846 |
| hsa-miR-6835 NM_006103  | WFDC2 | 0.96153846 |
| hsa-miR-6848 NM_006103  | WFDC2 | 0.96153846 |
| hsa-miR-1212 NM_006103  | WFDC2 | 0.96153846 |
| hsa-miR-1207 NM_006103  | WFDC2 | 0.98076923 |
| hsa-miR-4721 NM_006103  | WFDC2 | 0.98076923 |
| hsa-miR-23a-2 NM_006103 | WFDC2 | 1          |
| hsa-miR-92a-2 NM_006103 | WFDC2 | 1          |
| hsa-miR-30c-1 NM_006103 | WFDC2 | 1          |
| hsa-miR-219a NM_006103  | WFDC2 | 1          |
| hsa-miR-125b NM_006103  | WFDC2 | 1          |
| hsa-miR-125a NM_006103  | WFDC2 | 1          |
| hsa-miR-296-1 NM_006103 | WFDC2 | 1          |
| hsa-miR-363-1 NM_006103 | WFDC2 | 1          |
| hsa-miR-423-1 NM_006103 | WFDC2 | 1          |
| hsa-miR-512-1 NM_006103 | WFDC2 | 1          |
| hsa-miR-520a NM_006103  | WFDC2 | 1          |
| hsa-miR-550a NM_006103  | WFDC2 | 1          |
| hsa-miR-668-1 NM_006103 | WFDC2 | 1          |
| hsa-miR-762 NM_006103   | WFDC2 | 1          |
| hsa-miR-1298 NM_006103  | WFDC2 | 1          |
| hsa-miR-541-1 NM_006103 | WFDC2 | 1          |
| hsa-miR-920 NM_006103   | WFDC2 | 1          |
| hsa-miR-1227 NM_006103  | WFDC2 | 1          |

|                        |       |   |
|------------------------|-------|---|
| hsa-miR-1250 NM_006103 | WFDC2 | 1 |
| hsa-miR-1251 NM_006103 | WFDC2 | 1 |
| hsa-miR-1270 NM_006103 | WFDC2 | 1 |
| hsa-miR-1471 NM_006103 | WFDC2 | 1 |
| hsa-miR-1909 NM_006103 | WFDC2 | 1 |
| hsa-miR-1915 NM_006103 | WFDC2 | 1 |
| hsa-miR-3116 NM_006103 | WFDC2 | 1 |
| hsa-miR-3141 NM_006103 | WFDC2 | 1 |
| hsa-miR-3154 NM_006103 | WFDC2 | 1 |
| hsa-miR-3192 NM_006103 | WFDC2 | 1 |
| hsa-miR-3198 NM_006103 | WFDC2 | 1 |
| hsa-miR-514b NM_006103 | WFDC2 | 1 |
| hsa-miR-4314 NM_006103 | WFDC2 | 1 |
| hsa-miR-4322 NM_006103 | WFDC2 | 1 |
| hsa-miR-4257 NM_006103 | WFDC2 | 1 |
| hsa-miR-4265 NM_006103 | WFDC2 | 1 |
| hsa-miR-3616 NM_006103 | WFDC2 | 1 |
| hsa-miR-3665 NM_006103 | WFDC2 | 1 |
| hsa-miR-3914 NM_006103 | WFDC2 | 1 |
| hsa-miR-3918 NM_006103 | WFDC2 | 1 |
| hsa-miR-3940 NM_006103 | WFDC2 | 1 |
| hsa-miR-4425 NM_006103 | WFDC2 | 1 |
| hsa-miR-4436 NM_006103 | WFDC2 | 1 |
| hsa-miR-4441 NM_006103 | WFDC2 | 1 |
| hsa-miR-4450 NM_006103 | WFDC2 | 1 |
| hsa-miR-4484 NM_006103 | WFDC2 | 1 |
| hsa-miR-4505 NM_006103 | WFDC2 | 1 |
| hsa-miR-2392 NM_006103 | WFDC2 | 1 |
| hsa-miR-4645 NM_006103 | WFDC2 | 1 |
| hsa-miR-4649 NM_006103 | WFDC2 | 1 |
| hsa-miR-4651 NM_006103 | WFDC2 | 1 |
| hsa-miR-4660 NM_006103 | WFDC2 | 1 |
| hsa-miR-4665 NM_006103 | WFDC2 | 1 |
| hsa-miR-4675 NM_006103 | WFDC2 | 1 |
| hsa-miR-1343 NM_006103 | WFDC2 | 1 |
| hsa-miR-4710 NM_006103 | WFDC2 | 1 |
| hsa-miR-4728 NM_006103 | WFDC2 | 1 |
| hsa-miR-4736 NM_006103 | WFDC2 | 1 |
| hsa-miR-4740 NM_006103 | WFDC2 | 1 |
| hsa-miR-2467 NM_006103 | WFDC2 | 1 |
| hsa-miR-5001 NM_006103 | WFDC2 | 1 |
| hsa-miR-5088 NM_006103 | WFDC2 | 1 |
| hsa-miR-5090 NM_006103 | WFDC2 | 1 |
| hsa-miR-5187 NM_006103 | WFDC2 | 1 |
| hsa-miR-5196 NM_006103 | WFDC2 | 1 |
| hsa-miR-5196 NM_006103 | WFDC2 | 1 |
| hsa-miR-664b NM_006103 | WFDC2 | 1 |
| hsa-miR-5683 NM_006103 | WFDC2 | 1 |
| hsa-miR-548a NM_006103 | WFDC2 | 1 |
| hsa-miR-5698 NM_006103 | WFDC2 | 1 |
| hsa-miR-6077 NM_006103 | WFDC2 | 1 |
| hsa-miR-6081 NM_006103 | WFDC2 | 1 |
| hsa-miR-6083 NM_006103 | WFDC2 | 1 |
| hsa-miR-6086 NM_006103 | WFDC2 | 1 |
| hsa-miR-6132 NM_006103 | WFDC2 | 1 |
| hsa-miR-6133 NM_006103 | WFDC2 | 1 |
| hsa-miR-6503 NM_006103 | WFDC2 | 1 |
| hsa-miR-6515 NM_006103 | WFDC2 | 1 |
| hsa-miR-6716 NM_006103 | WFDC2 | 1 |
| hsa-miR-6722 NM_006103 | WFDC2 | 1 |
| hsa-miR-6730 NM_006103 | WFDC2 | 1 |
| hsa-miR-6736 NM_006103 | WFDC2 | 1 |
| hsa-miR-6737 NM_006103 | WFDC2 | 1 |
| hsa-miR-6741 NM_006103 | WFDC2 | 1 |
| hsa-miR-6742 NM_006103 | WFDC2 | 1 |
| hsa-miR-6743 NM_006103 | WFDC2 | 1 |
| hsa-miR-6748 NM_006103 | WFDC2 | 1 |
| hsa-miR-6750 NM_006103 | WFDC2 | 1 |
| hsa-miR-6758 NM_006103 | WFDC2 | 1 |
| hsa-miR-6760 NM_006103 | WFDC2 | 1 |
| hsa-miR-6763 NM_006103 | WFDC2 | 1 |
| hsa-miR-6765 NM_006103 | WFDC2 | 1 |
| hsa-miR-6771 NM_006103 | WFDC2 | 1 |
| hsa-miR-6773 NM_006103 | WFDC2 | 1 |
| hsa-miR-6778 NM_006103 | WFDC2 | 1 |
| hsa-miR-6779 NM_006103 | WFDC2 | 1 |
| hsa-miR-6780 NM_006103 | WFDC2 | 1 |
| hsa-miR-6780 NM_006103 | WFDC2 | 1 |
| hsa-miR-6785 NM_006103 | WFDC2 | 1 |
| hsa-miR-6786 NM_006103 | WFDC2 | 1 |
| hsa-miR-6788 NM_006103 | WFDC2 | 1 |
| hsa-miR-6799 NM_006103 | WFDC2 | 1 |
| hsa-miR-6803 NM_006103 | WFDC2 | 1 |
| hsa-miR-6816 NM_006103 | WFDC2 | 1 |
| hsa-miR-6824 NM_006103 | WFDC2 | 1 |
| hsa-miR-6825 NM_006103 | WFDC2 | 1 |
| hsa-miR-6825 NM_006103 | WFDC2 | 1 |
| hsa-miR-6836 NM_006103 | WFDC2 | 1 |
| hsa-miR-6845 NM_006103 | WFDC2 | 1 |
| hsa-miR-6846 NM_006103 | WFDC2 | 1 |
| hsa-miR-6845 NM_006103 | WFDC2 | 1 |
| hsa-miR-6855 NM_006103 | WFDC2 | 1 |
| hsa-miR-6769 NM_006103 | WFDC2 | 1 |
| hsa-miR-6861 NM_006103 | WFDC2 | 1 |

|                         |         |            |
|-------------------------|---------|------------|
| hsa-miR-687C NM_006103  | WFDC2   | 1          |
| hsa-miR-6873 NM_006103  | WFDC2   | 1          |
| hsa-miR-6877 NM_006103  | WFDC2   | 1          |
| hsa-miR-687S NM_006103  | WFDC2   | 1          |
| hsa-miR-6883 NM_006103  | WFDC2   | 1          |
| hsa-miR-6886 NM_006103  | WFDC2   | 1          |
| hsa-miR-689C NM_006103  | WFDC2   | 1          |
| hsa-miR-6892 NM_006103  | WFDC2   | 1          |
| hsa-miR-7111 NM_006103  | WFDC2   | 1          |
| hsa-miR-715C NM_006103  | WFDC2   | 1          |
| hsa-miR-7151 NM_006103  | WFDC2   | 1          |
| hsa-miR-7845 NM_006103  | WFDC2   | 1          |
| hsa-miR-8056 NM_006103  | WFDC2   | 1          |
| hsa-miR-8071 NM_006103  | WFDC2   | 1          |
| hsa-miR-8085 NM_006103  | WFDC2   | 1          |
| hsa-miR-808S NM_006103  | WFDC2   | 1          |
| hsa-miR-103S NM_006103  | WFDC2   | 1          |
| hsa-miR-103S NM_006103  | WFDC2   | 1          |
| hsa-miR-103S NM_006103  | WFDC2   | 1          |
| hsa-miR-1118 NM_006103  | WFDC2   | 1          |
| hsa-miR-1211 NM_006103  | WFDC2   | 1          |
| hsa-miR-1212 NM_006103  | WFDC2   | 1          |
| hsa-miR-1212 NM_006103  | WFDC2   | 1          |
| hsa-miR-320d NM_006235  | POU2AF1 | 0.95384615 |
| hsa-miR-442S NM_006235  | POU2AF1 | 0.95384615 |
| hsa-miR-6124 NM_006235  | POU2AF1 | 0.95604396 |
| hsa-miR-680S NM_006235  | POU2AF1 | 0.95604396 |
| hsa-miR-767- NM_006235  | POU2AF1 | 0.96153846 |
| hsa-miR-3175 NM_006235  | POU2AF1 | 0.96153846 |
| hsa-miR-4537 NM_006235  | POU2AF1 | 0.96153846 |
| hsa-miR-4747 NM_006235  | POU2AF1 | 0.96153846 |
| hsa-miR-6504 NM_006235  | POU2AF1 | 0.96153846 |
| hsa-miR-6773 NM_006235  | POU2AF1 | 0.96153846 |
| hsa-miR-7855 NM_006235  | POU2AF1 | 0.96153846 |
| hsa-miR-9902 NM_006235  | POU2AF1 | 0.96153846 |
| hsa-miR-31-5j NM_006235 | POU2AF1 | 0.96703297 |
| hsa-miR-1825 NM_006235  | POU2AF1 | 0.96923077 |
| hsa-miR-1273 NM_006235  | POU2AF1 | 0.96923077 |
| hsa-miR-3153 NM_006235  | POU2AF1 | 0.96923077 |
| hsa-miR-320C NM_006235  | POU2AF1 | 0.97435897 |
| hsa-miR-4716 NM_006235  | POU2AF1 | 0.97435897 |
| hsa-miR-4728 NM_006235  | POU2AF1 | 0.97435897 |
| hsa-miR-676S NM_006235  | POU2AF1 | 0.97435897 |
| hsa-miR-681S NM_006235  | POU2AF1 | 0.97435897 |
| hsa-miR-6841 NM_006235  | POU2AF1 | 0.97435897 |
| hsa-miR-676S NM_006235  | POU2AF1 | 0.97435897 |
| hsa-miR-3085 NM_006235  | POU2AF1 | 0.97435897 |
| hsa-miR-4478 NM_006235  | POU2AF1 | 0.97435897 |
| hsa-miR-320e NM_006235  | POU2AF1 | 0.98076923 |
| hsa-miR-3944 NM_006235  | POU2AF1 | 0.98076923 |
| hsa-miR-4722 NM_006235  | POU2AF1 | 0.98076923 |
| hsa-miR-6794 NM_006235  | POU2AF1 | 0.98076923 |
| hsa-miR-6827 NM_006235  | POU2AF1 | 0.98076923 |
| hsa-miR-7154 NM_006235  | POU2AF1 | 0.98076923 |
| hsa-miR-7155 NM_006235  | POU2AF1 | 0.98076923 |
| hsa-miR-4433 NM_006235  | POU2AF1 | 0.98076923 |
| hsa-miR-7854 NM_006235  | POU2AF1 | 0.98076923 |
| hsa-let-7e-5p NM_006235 | POU2AF1 | 1          |
| hsa-let-7e-5p NM_006235 | POU2AF1 | 1          |
| hsa-miR-19b- NM_006235  | POU2AF1 | 1          |
| hsa-miR-24-3j NM_006235 | POU2AF1 | 1          |
| hsa-miR-24-3j NM_006235 | POU2AF1 | 1          |
| hsa-miR-25-3j NM_006235 | POU2AF1 | 1          |
| hsa-miR-33a- NM_006235  | POU2AF1 | 1          |
| hsa-miR-92a- NM_006235  | POU2AF1 | 1          |
| hsa-miR-92a- NM_006235  | POU2AF1 | 1          |
| hsa-miR-93-5j NM_006235 | POU2AF1 | 1          |
| hsa-miR-29b- NM_006235  | POU2AF1 | 1          |
| hsa-miR-29b- NM_006235  | POU2AF1 | 1          |
| hsa-miR-197- NM_006235  | POU2AF1 | 1          |
| hsa-miR-34a- NM_006235  | POU2AF1 | 1          |
| hsa-miR-183- NM_006235  | POU2AF1 | 1          |
| hsa-miR-203a NM_006235  | POU2AF1 | 1          |
| hsa-miR-204- NM_006235  | POU2AF1 | 1          |
| hsa-miR-181a NM_006235  | POU2AF1 | 1          |
| hsa-miR-224- NM_006235  | POU2AF1 | 1          |
| hsa-let-7i-5p NM_006235 | POU2AF1 | 1          |
| hsa-miR-23b- NM_006235  | POU2AF1 | 1          |
| hsa-miR-122- NM_006235  | POU2AF1 | 1          |
| hsa-miR-138- NM_006235  | POU2AF1 | 1          |
| hsa-miR-145- NM_006235  | POU2AF1 | 1          |
| hsa-miR-152- NM_006235  | POU2AF1 | 1          |
| hsa-miR-191- NM_006235  | POU2AF1 | 1          |
| hsa-miR-146a NM_006235  | POU2AF1 | 1          |
| hsa-miR-149- NM_006235  | POU2AF1 | 1          |
| hsa-miR-149- NM_006235  | POU2AF1 | 1          |
| hsa-miR-150- NM_006235  | POU2AF1 | 1          |
| hsa-miR-150- NM_006235  | POU2AF1 | 1          |
| hsa-miR-188- NM_006235  | POU2AF1 | 1          |
| hsa-miR-188- NM_006235  | POU2AF1 | 1          |
| hsa-miR-320a NM_006235  | POU2AF1 | 1          |
| hsa-miR-101- NM_006235  | POU2AF1 | 1          |
| hsa-miR-219a NM_006235  | POU2AF1 | 1          |
| hsa-miR-301a NM_006235  | POU2AF1 | 1          |



|                        |         |   |
|------------------------|---------|---|
| hsa-miR-99b- NM_006235 | POU2AF1 | 1 |
| hsa-miR-130b NM_006235 | POU2AF1 | 1 |
| hsa-miR-302d NM_006235 | POU2AF1 | 1 |
| hsa-miR-330- NM_006235 | POU2AF1 | 1 |
| hsa-miR-337- NM_006235 | POU2AF1 | 1 |
| hsa-miR-384 NM_006235  | POU2AF1 | 1 |
| hsa-miR-423- NM_006235 | POU2AF1 | 1 |
| hsa-miR-18b- NM_006235 | POU2AF1 | 1 |
| hsa-miR-412- NM_006235 | POU2AF1 | 1 |
| hsa-miR-483- NM_006235 | POU2AF1 | 1 |
| hsa-miR-490- NM_006235 | POU2AF1 | 1 |
| hsa-miR-193b NM_006235 | POU2AF1 | 1 |
| hsa-miR-512- NM_006235 | POU2AF1 | 1 |
| hsa-miR-517a NM_006235 | POU2AF1 | 1 |
| hsa-miR-517b NM_006235 | POU2AF1 | 1 |
| hsa-miR-516b NM_006235 | POU2AF1 | 1 |
| hsa-miR-516a NM_006235 | POU2AF1 | 1 |
| hsa-miR-500a NM_006235 | POU2AF1 | 1 |
| hsa-miR-500a NM_006235 | POU2AF1 | 1 |
| hsa-miR-501- NM_006235 | POU2AF1 | 1 |
| hsa-miR-501- NM_006235 | POU2AF1 | 1 |
| hsa-miR-502- NM_006235 | POU2AF1 | 1 |
| hsa-miR-502- NM_006235 | POU2AF1 | 1 |
| hsa-miR-502- NM_006235 | POU2AF1 | 1 |
| hsa-miR-503- NM_006235 | POU2AF1 | 1 |
| hsa-miR-506- NM_006235 | POU2AF1 | 1 |
| hsa-miR-509- NM_006235 | POU2AF1 | 1 |
| hsa-miR-551a NM_006235 | POU2AF1 | 1 |
| hsa-miR-553 NM_006235  | POU2AF1 | 1 |
| hsa-miR-92b- NM_006235 | POU2AF1 | 1 |
| hsa-miR-557 NM_006235  | POU2AF1 | 1 |
| hsa-miR-551b NM_006235 | POU2AF1 | 1 |
| hsa-miR-589- NM_006235 | POU2AF1 | 1 |
| hsa-miR-596 NM_006235  | POU2AF1 | 1 |
| hsa-miR-600 NM_006235  | POU2AF1 | 1 |
| hsa-miR-619- NM_006235 | POU2AF1 | 1 |
| hsa-miR-619- NM_006235 | POU2AF1 | 1 |
| hsa-miR-643 NM_006235  | POU2AF1 | 1 |
| hsa-miR-661 NM_006235  | POU2AF1 | 1 |
| hsa-miR-449b NM_006235 | POU2AF1 | 1 |
| hsa-miR-654- NM_006235 | POU2AF1 | 1 |
| hsa-miR-659- NM_006235 | POU2AF1 | 1 |
| hsa-miR-671- NM_006235 | POU2AF1 | 1 |
| hsa-miR-668- NM_006235 | POU2AF1 | 1 |
| hsa-miR-550a NM_006235 | POU2AF1 | 1 |
| hsa-miR-1224 NM_006235 | POU2AF1 | 1 |
| hsa-miR-1301 NM_006235 | POU2AF1 | 1 |
| hsa-miR-1301 NM_006235 | POU2AF1 | 1 |
| hsa-miR-769- NM_006235 | POU2AF1 | 1 |
| hsa-miR-378d NM_006235 | POU2AF1 | 1 |
| hsa-miR-761 NM_006235  | POU2AF1 | 1 |
| hsa-miR-885- NM_006235 | POU2AF1 | 1 |
| hsa-miR-877- NM_006235 | POU2AF1 | 1 |
| hsa-miR-887- NM_006235 | POU2AF1 | 1 |
| hsa-miR-887- NM_006235 | POU2AF1 | 1 |
| hsa-miR-873- NM_006235 | POU2AF1 | 1 |
| hsa-miR-937- NM_006235 | POU2AF1 | 1 |
| hsa-miR-1178 NM_006235 | POU2AF1 | 1 |
| hsa-miR-1182 NM_006235 | POU2AF1 | 1 |
| hsa-miR-1182 NM_006235 | POU2AF1 | 1 |
| hsa-miR-1225 NM_006235 | POU2AF1 | 1 |
| hsa-miR-1225 NM_006235 | POU2AF1 | 1 |
| hsa-miR-1233 NM_006235 | POU2AF1 | 1 |
| hsa-miR-1234 NM_006235 | POU2AF1 | 1 |
| hsa-miR-1237 NM_006235 | POU2AF1 | 1 |
| hsa-miR-1202 NM_006235 | POU2AF1 | 1 |
| hsa-miR-1203 NM_006235 | POU2AF1 | 1 |
| hsa-miR-1285 NM_006235 | POU2AF1 | 1 |
| hsa-miR-1286 NM_006235 | POU2AF1 | 1 |
| hsa-miR-1287 NM_006235 | POU2AF1 | 1 |
| hsa-miR-1287 NM_006235 | POU2AF1 | 1 |
| hsa-miR-1287 NM_006235 | POU2AF1 | 1 |
| hsa-miR-1290 NM_006235 | POU2AF1 | 1 |
| hsa-miR-1266 NM_006235 | POU2AF1 | 1 |
| hsa-miR-1281 NM_006235 | POU2AF1 | 1 |
| hsa-miR-1292 NM_006235 | POU2AF1 | 1 |
| hsa-miR-1255 NM_006235 | POU2AF1 | 1 |
| hsa-miR-1535 NM_006235 | POU2AF1 | 1 |
| hsa-miR-1905 NM_006235 | POU2AF1 | 1 |
| hsa-miR-1910 NM_006235 | POU2AF1 | 1 |
| hsa-miR-1911 NM_006235 | POU2AF1 | 1 |
| hsa-miR-1914 NM_006235 | POU2AF1 | 1 |
| hsa-miR-1976 NM_006235 | POU2AF1 | 1 |
| hsa-miR-1976 NM_006235 | POU2AF1 | 1 |
| hsa-miR-2116 NM_006235 | POU2AF1 | 1 |
| hsa-miR-2117 NM_006235 | POU2AF1 | 1 |
| hsa-miR-2276 NM_006235 | POU2AF1 | 1 |
| hsa-miR-3120 NM_006235 | POU2AF1 | 1 |
| hsa-miR-3120 NM_006235 | POU2AF1 | 1 |
| hsa-miR-3124 NM_006235 | POU2AF1 | 1 |
| hsa-miR-3124 NM_006235 | POU2AF1 | 1 |
| hsa-miR-3125 NM_006235 | POU2AF1 | 1 |
| hsa-miR-3137 NM_006235 | POU2AF1 | 1 |
| hsa-miR-3144 NM_006235 | POU2AF1 | 1 |







|                         |         |            |
|-------------------------|---------|------------|
| hsa-miR-8052 NM_006235  | POU2AF1 | 1          |
| hsa-miR-8052 NM_006235  | POU2AF1 | 1          |
| hsa-miR-8058 NM_006235  | POU2AF1 | 1          |
| hsa-miR-8072 NM_006235  | POU2AF1 | 1          |
| hsa-miR-8073 NM_006235  | POU2AF1 | 1          |
| hsa-miR-8079 NM_006235  | POU2AF1 | 1          |
| hsa-miR-8086 NM_006235  | POU2AF1 | 1          |
| hsa-miR-8088 NM_006235  | POU2AF1 | 1          |
| hsa-miR-9718 NM_006235  | POU2AF1 | 1          |
| hsa-miR-1039 NM_006235  | POU2AF1 | 1          |
| hsa-miR-1039 NM_006235  | POU2AF1 | 1          |
| hsa-miR-1040 NM_006235  | POU2AF1 | 1          |
| hsa-miR-1040 NM_006235  | POU2AF1 | 1          |
| hsa-miR-1039 NM_006235  | POU2AF1 | 1          |
| hsa-miR-1118 NM_006235  | POU2AF1 | 1          |
| hsa-miR-1139 NM_006235  | POU2AF1 | 1          |
| hsa-miR-3085 NM_006235  | POU2AF1 | 1          |
| hsa-miR-3085 NM_006235  | POU2AF1 | 1          |
| hsa-miR-6529 NM_006235  | POU2AF1 | 1          |
| hsa-miR-9851 NM_006235  | POU2AF1 | 1          |
| hsa-miR-1211 NM_006235  | POU2AF1 | 1          |
| hsa-miR-1211 NM_006235  | POU2AF1 | 1          |
| hsa-miR-208a NM_006408  | AGR2    | 0.95384615 |
| hsa-miR-518c NM_006408  | AGR2    | 0.96153846 |
| hsa-miR-612 NM_006408   | AGR2    | 0.96153846 |
| hsa-miR-1266 NM_006408  | AGR2    | 0.96153846 |
| hsa-miR-3180 NM_006408  | AGR2    | 0.96153846 |
| hsa-miR-3944 NM_006408  | AGR2    | 0.96153846 |
| hsa-miR-4714 NM_006408  | AGR2    | 0.96153846 |
| hsa-miR-4804 NM_006408  | AGR2    | 0.96153846 |
| hsa-miR-5001 NM_006408  | AGR2    | 0.96153846 |
| hsa-miR-5708 NM_006408  | AGR2    | 0.96153846 |
| hsa-miR-6759 NM_006408  | AGR2    | 0.96153846 |
| hsa-miR-6795 NM_006408  | AGR2    | 0.96153846 |
| hsa-miR-6840 NM_006408  | AGR2    | 0.96153846 |
| hsa-miR-6877 NM_006408  | AGR2    | 0.96153846 |
| hsa-miR-6894 NM_006408  | AGR2    | 0.96153846 |
| hsa-miR-8085 NM_006408  | AGR2    | 0.96153846 |
| hsa-miR-3059 NM_006408  | AGR2    | 0.96153846 |
| hsa-miR-3151 NM_006408  | AGR2    | 0.97435897 |
| hsa-miR-554 NM_006408   | AGR2    | 0.98076923 |
| hsa-miR-2277 NM_006408  | AGR2    | 0.98076923 |
| hsa-miR-3190 NM_006408  | AGR2    | 0.98076923 |
| hsa-miR-4312 NM_006408  | AGR2    | 0.98076923 |
| hsa-miR-3690 NM_006408  | AGR2    | 0.98076923 |
| hsa-miR-7109 NM_006408  | AGR2    | 0.98076923 |
| hsa-miR-7150 NM_006408  | AGR2    | 0.98076923 |
| hsa-miR-7976 NM_006408  | AGR2    | 0.98076923 |
| hsa-miR-23a-1 NM_006408 | AGR2    | 1          |
| hsa-miR-29a-1 NM_006408 | AGR2    | 1          |
| hsa-miR-92a-1 NM_006408 | AGR2    | 1          |
| hsa-miR-96-3j NM_006408 | AGR2    | 1          |
| hsa-miR-103a NM_006408  | AGR2    | 1          |
| hsa-miR-103a NM_006408  | AGR2    | 1          |
| hsa-miR-107 NM_006408   | AGR2    | 1          |
| hsa-miR-197-1 NM_006408 | AGR2    | 1          |
| hsa-miR-198 NM_006408   | AGR2    | 1          |
| hsa-miR-198 NM_006408   | AGR2    | 1          |
| hsa-miR-139-1 NM_006408 | AGR2    | 1          |
| hsa-miR-183-1 NM_006408 | AGR2    | 1          |
| hsa-miR-187-1 NM_006408 | AGR2    | 1          |
| hsa-miR-219a NM_006408  | AGR2    | 1          |
| hsa-miR-23b-1 NM_006408 | AGR2    | 1          |
| hsa-miR-128-1 NM_006408 | AGR2    | 1          |
| hsa-miR-129-1 NM_006408 | AGR2    | 1          |
| hsa-miR-128-1 NM_006408 | AGR2    | 1          |
| hsa-miR-99b-1 NM_006408 | AGR2    | 1          |
| hsa-miR-296-1 NM_006408 | AGR2    | 1          |
| hsa-miR-296-1 NM_006408 | AGR2    | 1          |
| hsa-miR-362-1 NM_006408 | AGR2    | 1          |
| hsa-miR-365a NM_006408  | AGR2    | 1          |
| hsa-miR-365a NM_006408  | AGR2    | 1          |
| hsa-miR-373-1 NM_006408 | AGR2    | 1          |
| hsa-miR-330-1 NM_006408 | AGR2    | 1          |
| hsa-miR-328-1 NM_006408 | AGR2    | 1          |
| hsa-miR-339-1 NM_006408 | AGR2    | 1          |
| hsa-miR-345-1 NM_006408 | AGR2    | 1          |
| hsa-miR-196b NM_006408  | AGR2    | 1          |
| hsa-miR-20b-1 NM_006408 | AGR2    | 1          |
| hsa-miR-412-1 NM_006408 | AGR2    | 1          |
| hsa-miR-491-1 NM_006408 | AGR2    | 1          |
| hsa-miR-498-1 NM_006408 | AGR2    | 1          |
| hsa-miR-498-1 NM_006408 | AGR2    | 1          |
| hsa-miR-525-1 NM_006408 | AGR2    | 1          |
| hsa-miR-524-1 NM_006408 | AGR2    | 1          |
| hsa-miR-520h NM_006408  | AGR2    | 1          |
| hsa-miR-504-1 NM_006408 | AGR2    | 1          |
| hsa-miR-510-1 NM_006408 | AGR2    | 1          |
| hsa-miR-455-1 NM_006408 | AGR2    | 1          |
| hsa-miR-539-1 NM_006408 | AGR2    | 1          |
| hsa-miR-555 NM_006408   | AGR2    | 1          |
| hsa-miR-574-1 NM_006408 | AGR2    | 1          |
| hsa-miR-574-1 NM_006408 | AGR2    | 1          |
| hsa-miR-584-1 NM_006408 | AGR2    | 1          |

|              |           |      |   |
|--------------|-----------|------|---|
| hsa-miR-608  | NM_006408 | AGR2 | 1 |
| hsa-miR-610  | NM_006408 | AGR2 | 1 |
| hsa-miR-611  | NM_006408 | AGR2 | 1 |
| hsa-miR-613  | NM_006408 | AGR2 | 1 |
| hsa-miR-616  | NM_006408 | AGR2 | 1 |
| hsa-miR-625  | NM_006408 | AGR2 | 1 |
| hsa-miR-638  | NM_006408 | AGR2 | 1 |
| hsa-miR-652  | NM_006408 | AGR2 | 1 |
| hsa-miR-661  | NM_006408 | AGR2 | 1 |
| hsa-miR-654  | NM_006408 | AGR2 | 1 |
| hsa-miR-671  | NM_006408 | AGR2 | 1 |
| hsa-miR-767  | NM_006408 | AGR2 | 1 |
| hsa-miR-1224 | NM_006408 | AGR2 | 1 |
| hsa-miR-1224 | NM_006408 | AGR2 | 1 |
| hsa-miR-762  | NM_006408 | AGR2 | 1 |
| hsa-miR-770  | NM_006408 | AGR2 | 1 |
| hsa-miR-874  | NM_006408 | AGR2 | 1 |
| hsa-miR-665  | NM_006408 | AGR2 | 1 |
| hsa-miR-665  | NM_006408 | AGR2 | 1 |
| hsa-miR-920  | NM_006408 | AGR2 | 1 |
| hsa-miR-920  | NM_006408 | AGR2 | 1 |
| hsa-miR-935  | NM_006408 | AGR2 | 1 |
| hsa-miR-937  | NM_006408 | AGR2 | 1 |
| hsa-miR-1183 | NM_006408 | AGR2 | 1 |
| hsa-miR-1225 | NM_006408 | AGR2 | 1 |
| hsa-miR-1227 | NM_006408 | AGR2 | 1 |
| hsa-miR-1233 | NM_006408 | AGR2 | 1 |
| hsa-miR-1234 | NM_006408 | AGR2 | 1 |
| hsa-miR-1237 | NM_006408 | AGR2 | 1 |
| hsa-miR-1238 | NM_006408 | AGR2 | 1 |
| hsa-miR-1202 | NM_006408 | AGR2 | 1 |
| hsa-miR-1207 | NM_006408 | AGR2 | 1 |
| hsa-miR-548j | NM_006408 | AGR2 | 1 |
| hsa-miR-129C | NM_006408 | AGR2 | 1 |
| hsa-miR-1246 | NM_006408 | AGR2 | 1 |
| hsa-miR-1266 | NM_006408 | AGR2 | 1 |
| hsa-miR-1268 | NM_006408 | AGR2 | 1 |
| hsa-miR-1276 | NM_006408 | AGR2 | 1 |
| hsa-miR-1306 | NM_006408 | AGR2 | 1 |
| hsa-miR-1471 | NM_006408 | AGR2 | 1 |
| hsa-miR-1909 | NM_006408 | AGR2 | 1 |
| hsa-miR-2114 | NM_006408 | AGR2 | 1 |
| hsa-miR-2682 | NM_006408 | AGR2 | 1 |
| hsa-miR-3122 | NM_006408 | AGR2 | 1 |
| hsa-miR-3127 | NM_006408 | AGR2 | 1 |
| hsa-miR-3144 | NM_006408 | AGR2 | 1 |
| hsa-miR-3151 | NM_006408 | AGR2 | 1 |
| hsa-miR-3154 | NM_006408 | AGR2 | 1 |
| hsa-miR-3158 | NM_006408 | AGR2 | 1 |
| hsa-miR-3162 | NM_006408 | AGR2 | 1 |
| hsa-miR-3173 | NM_006408 | AGR2 | 1 |
| hsa-miR-3174 | NM_006408 | AGR2 | 1 |
| hsa-miR-318C | NM_006408 | AGR2 | 1 |
| hsa-miR-3187 | NM_006408 | AGR2 | 1 |
| hsa-miR-3187 | NM_006408 | AGR2 | 1 |
| hsa-miR-319C | NM_006408 | AGR2 | 1 |
| hsa-miR-3192 | NM_006408 | AGR2 | 1 |
| hsa-miR-3192 | NM_006408 | AGR2 | 1 |
| hsa-miR-3196 | NM_006408 | AGR2 | 1 |
| hsa-miR-4299 | NM_006408 | AGR2 | 1 |
| hsa-miR-4298 | NM_006408 | AGR2 | 1 |
| hsa-miR-4304 | NM_006408 | AGR2 | 1 |
| hsa-miR-4305 | NM_006408 | AGR2 | 1 |
| hsa-miR-4313 | NM_006408 | AGR2 | 1 |
| hsa-miR-4259 | NM_006408 | AGR2 | 1 |
| hsa-miR-4253 | NM_006408 | AGR2 | 1 |
| hsa-miR-4326 | NM_006408 | AGR2 | 1 |
| hsa-miR-4268 | NM_006408 | AGR2 | 1 |
| hsa-miR-427C | NM_006408 | AGR2 | 1 |
| hsa-miR-4271 | NM_006408 | AGR2 | 1 |
| hsa-miR-3617 | NM_006408 | AGR2 | 1 |
| hsa-miR-3675 | NM_006408 | AGR2 | 1 |
| hsa-miR-3675 | NM_006408 | AGR2 | 1 |
| hsa-miR-3681 | NM_006408 | AGR2 | 1 |
| hsa-miR-3907 | NM_006408 | AGR2 | 1 |
| hsa-miR-3909 | NM_006408 | AGR2 | 1 |
| hsa-miR-3921 | NM_006408 | AGR2 | 1 |
| hsa-miR-3922 | NM_006408 | AGR2 | 1 |
| hsa-miR-3925 | NM_006408 | AGR2 | 1 |
| hsa-miR-3928 | NM_006408 | AGR2 | 1 |
| hsa-miR-3934 | NM_006408 | AGR2 | 1 |
| hsa-miR-3945 | NM_006408 | AGR2 | 1 |
| hsa-miR-1268 | NM_006408 | AGR2 | 1 |
| hsa-miR-378g | NM_006408 | AGR2 | 1 |
| hsa-miR-4433 | NM_006408 | AGR2 | 1 |
| hsa-miR-4446 | NM_006408 | AGR2 | 1 |
| hsa-miR-4448 | NM_006408 | AGR2 | 1 |
| hsa-miR-445C | NM_006408 | AGR2 | 1 |
| hsa-miR-4455 | NM_006408 | AGR2 | 1 |
| hsa-miR-4456 | NM_006408 | AGR2 | 1 |
| hsa-miR-4467 | NM_006408 | AGR2 | 1 |
| hsa-miR-4471 | NM_006408 | AGR2 | 1 |
| hsa-miR-4482 | NM_006408 | AGR2 | 1 |
| hsa-miR-4484 | NM_006408 | AGR2 | 1 |

|                        |      |   |
|------------------------|------|---|
| hsa-miR-4486 NM_006408 | AGR2 | 1 |
| hsa-miR-4486 NM_006408 | AGR2 | 1 |
| hsa-miR-4487 NM_006408 | AGR2 | 1 |
| hsa-miR-4488 NM_006408 | AGR2 | 1 |
| hsa-miR-4492 NM_006408 | AGR2 | 1 |
| hsa-miR-4498 NM_006408 | AGR2 | 1 |
| hsa-miR-4505 NM_006408 | AGR2 | 1 |
| hsa-miR-2392 NM_006408 | AGR2 | 1 |
| hsa-miR-4508 NM_006408 | AGR2 | 1 |
| hsa-miR-4514 NM_006408 | AGR2 | 1 |
| hsa-miR-4522 NM_006408 | AGR2 | 1 |
| hsa-miR-4534 NM_006408 | AGR2 | 1 |
| hsa-miR-4535 NM_006408 | AGR2 | 1 |
| hsa-miR-4535 NM_006408 | AGR2 | 1 |
| hsa-miR-3978 NM_006408 | AGR2 | 1 |
| hsa-miR-4632 NM_006408 | AGR2 | 1 |
| hsa-miR-4632 NM_006408 | AGR2 | 1 |
| hsa-miR-4642 NM_006408 | AGR2 | 1 |
| hsa-miR-4649 NM_006408 | AGR2 | 1 |
| hsa-miR-4651 NM_006408 | AGR2 | 1 |
| hsa-miR-4652 NM_006408 | AGR2 | 1 |
| hsa-miR-4656 NM_006408 | AGR2 | 1 |
| hsa-miR-4667 NM_006408 | AGR2 | 1 |
| hsa-miR-4667 NM_006408 | AGR2 | 1 |
| hsa-miR-4674 NM_006408 | AGR2 | 1 |
| hsa-miR-4677 NM_006408 | AGR2 | 1 |
| hsa-miR-4685 NM_006408 | AGR2 | 1 |
| hsa-miR-4685 NM_006408 | AGR2 | 1 |
| hsa-miR-4687 NM_006408 | AGR2 | 1 |
| hsa-miR-4689 NM_006408 | AGR2 | 1 |
| hsa-miR-469C NM_006408 | AGR2 | 1 |
| hsa-miR-4695 NM_006408 | AGR2 | 1 |
| hsa-miR-4695 NM_006408 | AGR2 | 1 |
| hsa-miR-4697 NM_006408 | AGR2 | 1 |
| hsa-miR-4701 NM_006408 | AGR2 | 1 |
| hsa-miR-4704 NM_006408 | AGR2 | 1 |
| hsa-miR-471C NM_006408 | AGR2 | 1 |
| hsa-miR-4722 NM_006408 | AGR2 | 1 |
| hsa-miR-4725 NM_006408 | AGR2 | 1 |
| hsa-miR-4726 NM_006408 | AGR2 | 1 |
| hsa-miR-4731 NM_006408 | AGR2 | 1 |
| hsa-miR-4733 NM_006408 | AGR2 | 1 |
| hsa-miR-4735 NM_006408 | AGR2 | 1 |
| hsa-miR-4735 NM_006408 | AGR2 | 1 |
| hsa-miR-4743 NM_006408 | AGR2 | 1 |
| hsa-miR-4746 NM_006408 | AGR2 | 1 |
| hsa-miR-4746 NM_006408 | AGR2 | 1 |
| hsa-miR-4747 NM_006408 | AGR2 | 1 |
| hsa-miR-4749 NM_006408 | AGR2 | 1 |
| hsa-miR-4753 NM_006408 | AGR2 | 1 |
| hsa-miR-4754 NM_006408 | AGR2 | 1 |
| hsa-miR-4755 NM_006408 | AGR2 | 1 |
| hsa-miR-4763 NM_006408 | AGR2 | 1 |
| hsa-miR-4776 NM_006408 | AGR2 | 1 |
| hsa-miR-4784 NM_006408 | AGR2 | 1 |
| hsa-miR-2467 NM_006408 | AGR2 | 1 |
| hsa-miR-4786 NM_006408 | AGR2 | 1 |
| hsa-miR-4787 NM_006408 | AGR2 | 1 |
| hsa-miR-4788 NM_006408 | AGR2 | 1 |
| hsa-miR-480C NM_006408 | AGR2 | 1 |
| hsa-miR-5002 NM_006408 | AGR2 | 1 |
| hsa-miR-5004 NM_006408 | AGR2 | 1 |
| hsa-miR-5006 NM_006408 | AGR2 | 1 |
| hsa-miR-5011 NM_006408 | AGR2 | 1 |
| hsa-miR-5088 NM_006408 | AGR2 | 1 |
| hsa-miR-5193 NM_006408 | AGR2 | 1 |
| hsa-miR-5194 NM_006408 | AGR2 | 1 |
| hsa-miR-5194 NM_006408 | AGR2 | 1 |
| hsa-miR-4524 NM_006408 | AGR2 | 1 |
| hsa-miR-5572 NM_006408 | AGR2 | 1 |
| hsa-miR-5688 NM_006408 | AGR2 | 1 |
| hsa-miR-5681 NM_006408 | AGR2 | 1 |
| hsa-miR-5696 NM_006408 | AGR2 | 1 |
| hsa-miR-5698 NM_006408 | AGR2 | 1 |
| hsa-miR-6081 NM_006408 | AGR2 | 1 |
| hsa-miR-6085 NM_006408 | AGR2 | 1 |
| hsa-miR-6088 NM_006408 | AGR2 | 1 |
| hsa-miR-6088 NM_006408 | AGR2 | 1 |
| hsa-miR-6085 NM_006408 | AGR2 | 1 |
| hsa-miR-609C NM_006408 | AGR2 | 1 |
| hsa-miR-6124 NM_006408 | AGR2 | 1 |
| hsa-miR-6127 NM_006408 | AGR2 | 1 |
| hsa-miR-6129 NM_006408 | AGR2 | 1 |
| hsa-miR-6131 NM_006408 | AGR2 | 1 |
| hsa-miR-6131 NM_006408 | AGR2 | 1 |
| hsa-miR-6133 NM_006408 | AGR2 | 1 |
| hsa-miR-6133 NM_006408 | AGR2 | 1 |
| hsa-miR-6505 NM_006408 | AGR2 | 1 |
| hsa-miR-651C NM_006408 | AGR2 | 1 |
| hsa-miR-6515 NM_006408 | AGR2 | 1 |
| hsa-miR-6716 NM_006408 | AGR2 | 1 |
| hsa-miR-6727 NM_006408 | AGR2 | 1 |
| hsa-miR-6728 NM_006408 | AGR2 | 1 |
| hsa-miR-6729 NM_006408 | AGR2 | 1 |
| hsa-miR-6731 NM_006408 | AGR2 | 1 |

|                        |       |            |
|------------------------|-------|------------|
| hsa-miR-6735 NM_006408 | AGR2  | 1          |
| hsa-miR-6736 NM_006408 | AGR2  | 1          |
| hsa-miR-6737 NM_006408 | AGR2  | 1          |
| hsa-miR-6743 NM_006408 | AGR2  | 1          |
| hsa-miR-6743 NM_006408 | AGR2  | 1          |
| hsa-miR-6746 NM_006408 | AGR2  | 1          |
| hsa-miR-6746 NM_006408 | AGR2  | 1          |
| hsa-miR-6747 NM_006408 | AGR2  | 1          |
| hsa-miR-6748 NM_006408 | AGR2  | 1          |
| hsa-miR-6748 NM_006408 | AGR2  | 1          |
| hsa-miR-6749 NM_006408 | AGR2  | 1          |
| hsa-miR-6751 NM_006408 | AGR2  | 1          |
| hsa-miR-6751 NM_006408 | AGR2  | 1          |
| hsa-miR-6756 NM_006408 | AGR2  | 1          |
| hsa-miR-6762 NM_006408 | AGR2  | 1          |
| hsa-miR-6763 NM_006408 | AGR2  | 1          |
| hsa-miR-6764 NM_006408 | AGR2  | 1          |
| hsa-miR-6764 NM_006408 | AGR2  | 1          |
| hsa-miR-6771 NM_006408 | AGR2  | 1          |
| hsa-miR-6774 NM_006408 | AGR2  | 1          |
| hsa-miR-6775 NM_006408 | AGR2  | 1          |
| hsa-miR-6777 NM_006408 | AGR2  | 1          |
| hsa-miR-6778 NM_006408 | AGR2  | 1          |
| hsa-miR-678C NM_006408 | AGR2  | 1          |
| hsa-miR-6782 NM_006408 | AGR2  | 1          |
| hsa-miR-6785 NM_006408 | AGR2  | 1          |
| hsa-miR-6785 NM_006408 | AGR2  | 1          |
| hsa-miR-6786 NM_006408 | AGR2  | 1          |
| hsa-miR-6791 NM_006408 | AGR2  | 1          |
| hsa-miR-6791 NM_006408 | AGR2  | 1          |
| hsa-miR-6793 NM_006408 | AGR2  | 1          |
| hsa-miR-6796 NM_006408 | AGR2  | 1          |
| hsa-miR-6801 NM_006408 | AGR2  | 1          |
| hsa-miR-6803 NM_006408 | AGR2  | 1          |
| hsa-miR-681C NM_006408 | AGR2  | 1          |
| hsa-miR-6811 NM_006408 | AGR2  | 1          |
| hsa-miR-6813 NM_006408 | AGR2  | 1          |
| hsa-miR-6816 NM_006408 | AGR2  | 1          |
| hsa-miR-6818 NM_006408 | AGR2  | 1          |
| hsa-miR-682C NM_006408 | AGR2  | 1          |
| hsa-miR-6822 NM_006408 | AGR2  | 1          |
| hsa-miR-6824 NM_006408 | AGR2  | 1          |
| hsa-miR-6827 NM_006408 | AGR2  | 1          |
| hsa-miR-6828 NM_006408 | AGR2  | 1          |
| hsa-miR-6833 NM_006408 | AGR2  | 1          |
| hsa-miR-6836 NM_006408 | AGR2  | 1          |
| hsa-miR-6836 NM_006408 | AGR2  | 1          |
| hsa-miR-6836 NM_006408 | AGR2  | 1          |
| hsa-miR-6845 NM_006408 | AGR2  | 1          |
| hsa-miR-6851 NM_006408 | AGR2  | 1          |
| hsa-miR-6854 NM_006408 | AGR2  | 1          |
| hsa-miR-6858 NM_006408 | AGR2  | 1          |
| hsa-miR-6769 NM_006408 | AGR2  | 1          |
| hsa-miR-6866 NM_006408 | AGR2  | 1          |
| hsa-miR-687C NM_006408 | AGR2  | 1          |
| hsa-miR-6872 NM_006408 | AGR2  | 1          |
| hsa-miR-6875 NM_006408 | AGR2  | 1          |
| hsa-miR-6877 NM_006408 | AGR2  | 1          |
| hsa-miR-6879 NM_006408 | AGR2  | 1          |
| hsa-miR-688C NM_006408 | AGR2  | 1          |
| hsa-miR-6882 NM_006408 | AGR2  | 1          |
| hsa-miR-6883 NM_006408 | AGR2  | 1          |
| hsa-miR-689C NM_006408 | AGR2  | 1          |
| hsa-miR-6894 NM_006408 | AGR2  | 1          |
| hsa-miR-7107 NM_006408 | AGR2  | 1          |
| hsa-miR-7108 NM_006408 | AGR2  | 1          |
| hsa-miR-7109 NM_006408 | AGR2  | 1          |
| hsa-miR-711C NM_006408 | AGR2  | 1          |
| hsa-miR-7112 NM_006408 | AGR2  | 1          |
| hsa-miR-7112 NM_006408 | AGR2  | 1          |
| hsa-miR-7112 NM_006408 | AGR2  | 1          |
| hsa-miR-7154 NM_006408 | AGR2  | 1          |
| hsa-miR-716C NM_006408 | AGR2  | 1          |
| hsa-miR-7703 NM_006408 | AGR2  | 1          |
| hsa-miR-1273 NM_006408 | AGR2  | 1          |
| hsa-miR-7847 NM_006408 | AGR2  | 1          |
| hsa-miR-7848 NM_006408 | AGR2  | 1          |
| hsa-miR-7975 NM_006408 | AGR2  | 1          |
| hsa-miR-8078 NM_006408 | AGR2  | 1          |
| hsa-miR-8081 NM_006408 | AGR2  | 1          |
| hsa-miR-8082 NM_006408 | AGR2  | 1          |
| hsa-miR-8083 NM_006408 | AGR2  | 1          |
| hsa-miR-9718 NM_006408 | AGR2  | 1          |
| hsa-miR-9901 NM_006408 | AGR2  | 1          |
| hsa-miR-1039 NM_006408 | AGR2  | 1          |
| hsa-miR-1052 NM_006408 | AGR2  | 1          |
| hsa-miR-1139 NM_006408 | AGR2  | 1          |
| hsa-miR-3085 NM_006408 | AGR2  | 1          |
| hsa-miR-1211 NM_006408 | AGR2  | 1          |
| hsa-miR-1212 NM_006408 | AGR2  | 1          |
| hsa-miR-1212 NM_006408 | AGR2  | 1          |
| hsa-miR-1227 NM_006952 | UPK1B | 0.96153846 |



|               |           |       |            |
|---------------|-----------|-------|------------|
| hsa-miR-1304  | NM_006952 | UPK1B | 0.96153846 |
| hsa-miR-3181  | NM_006952 | UPK1B | 0.96153846 |
| hsa-miR-320e  | NM_006952 | UPK1B | 0.96153846 |
| hsa-miR-3685  | NM_006952 | UPK1B | 0.96153846 |
| hsa-miR-4505  | NM_006952 | UPK1B | 0.96153846 |
| hsa-miR-5007  | NM_006952 | UPK1B | 0.96153846 |
| hsa-miR-5698  | NM_006952 | UPK1B | 0.96153846 |
| hsa-miR-6077  | NM_006952 | UPK1B | 0.96153846 |
| hsa-miR-6735  | NM_006952 | UPK1B | 0.96153846 |
| hsa-miR-7114  | NM_006952 | UPK1B | 0.96153846 |
| hsa-miR-9986  | NM_006952 | UPK1B | 0.96153846 |
| hsa-miR-433-  | NM_006952 | UPK1B | 0.97435897 |
| hsa-miR-662   | NM_006952 | UPK1B | 0.97435897 |
| hsa-miR-4286  | NM_006952 | UPK1B | 0.97435897 |
| hsa-miR-3945  | NM_006952 | UPK1B | 0.97435897 |
| hsa-miR-6803  | NM_006952 | UPK1B | 0.97435897 |
| hsa-miR-9851  | NM_006952 | UPK1B | 0.97435897 |
| hsa-miR-6716  | NM_006952 | UPK1B | 0.98076923 |
| hsa-miR-6784  | NM_006952 | UPK1B | 0.98076923 |
| hsa-miR-21-5j | NM_006952 | UPK1B | 1          |
| hsa-miR-26a-  | NM_006952 | UPK1B | 1          |
| hsa-miR-208a  | NM_006952 | UPK1B | 1          |
| hsa-miR-203a  | NM_006952 | UPK1B | 1          |
| hsa-miR-214-  | NM_006952 | UPK1B | 1          |
| hsa-miR-216a  | NM_006952 | UPK1B | 1          |
| hsa-let-7g-5p | NM_006952 | UPK1B | 1          |
| hsa-miR-125t  | NM_006952 | UPK1B | 1          |
| hsa-miR-128-  | NM_006952 | UPK1B | 1          |
| hsa-miR-135a  | NM_006952 | UPK1B | 1          |
| hsa-miR-135a  | NM_006952 | UPK1B | 1          |
| hsa-miR-135a  | NM_006952 | UPK1B | 1          |
| hsa-miR-134-  | NM_006952 | UPK1B | 1          |
| hsa-miR-134-  | NM_006952 | UPK1B | 1          |
| hsa-miR-149-  | NM_006952 | UPK1B | 1          |
| hsa-miR-150-  | NM_006952 | UPK1B | 1          |
| hsa-miR-185-  | NM_006952 | UPK1B | 1          |
| hsa-miR-30c-  | NM_006952 | UPK1B | 1          |
| hsa-miR-34c-  | NM_006952 | UPK1B | 1          |
| hsa-miR-301a  | NM_006952 | UPK1B | 1          |
| hsa-miR-365a  | NM_006952 | UPK1B | 1          |
| hsa-miR-375-  | NM_006952 | UPK1B | 1          |
| hsa-miR-378a  | NM_006952 | UPK1B | 1          |
| hsa-miR-328-  | NM_006952 | UPK1B | 1          |
| hsa-miR-339-  | NM_006952 | UPK1B | 1          |
| hsa-miR-423-  | NM_006952 | UPK1B | 1          |
| hsa-miR-423-  | NM_006952 | UPK1B | 1          |
| hsa-miR-449a  | NM_006952 | UPK1B | 1          |
| hsa-miR-484   | NM_006952 | UPK1B | 1          |
| hsa-miR-181d  | NM_006952 | UPK1B | 1          |
| hsa-miR-519c  | NM_006952 | UPK1B | 1          |
| hsa-miR-519c  | NM_006952 | UPK1B | 1          |
| hsa-miR-519t  | NM_006952 | UPK1B | 1          |
| hsa-miR-519t  | NM_006952 | UPK1B | 1          |
| hsa-miR-525-  | NM_006952 | UPK1B | 1          |
| hsa-miR-523-  | NM_006952 | UPK1B | 1          |
| hsa-miR-523-  | NM_006952 | UPK1B | 1          |
| hsa-miR-518e  | NM_006952 | UPK1B | 1          |
| hsa-miR-518e  | NM_006952 | UPK1B | 1          |
| hsa-miR-522-  | NM_006952 | UPK1B | 1          |
| hsa-miR-522-  | NM_006952 | UPK1B | 1          |
| hsa-miR-519a  | NM_006952 | UPK1B | 1          |
| hsa-miR-519a  | NM_006952 | UPK1B | 1          |
| hsa-miR-501-  | NM_006952 | UPK1B | 1          |
| hsa-miR-504-  | NM_006952 | UPK1B | 1          |
| hsa-miR-504-  | NM_006952 | UPK1B | 1          |
| hsa-miR-504-  | NM_006952 | UPK1B | 1          |
| hsa-miR-514a  | NM_006952 | UPK1B | 1          |
| hsa-miR-551t  | NM_006952 | UPK1B | 1          |
| hsa-miR-610   | NM_006952 | UPK1B | 1          |
| hsa-miR-614   | NM_006952 | UPK1B | 1          |
| hsa-miR-619-  | NM_006952 | UPK1B | 1          |
| hsa-miR-636   | NM_006952 | UPK1B | 1          |
| hsa-miR-640   | NM_006952 | UPK1B | 1          |
| hsa-miR-645   | NM_006952 | UPK1B | 1          |
| hsa-miR-648   | NM_006952 | UPK1B | 1          |
| hsa-miR-657   | NM_006952 | UPK1B | 1          |
| hsa-miR-542-  | NM_006952 | UPK1B | 1          |
| hsa-miR-671-  | NM_006952 | UPK1B | 1          |
| hsa-miR-668-  | NM_006952 | UPK1B | 1          |
| hsa-miR-1224  | NM_006952 | UPK1B | 1          |
| hsa-miR-1301  | NM_006952 | UPK1B | 1          |
| hsa-miR-449c  | NM_006952 | UPK1B | 1          |
| hsa-miR-766-  | NM_006952 | UPK1B | 1          |
| hsa-miR-762   | NM_006952 | UPK1B | 1          |
| hsa-miR-1298  | NM_006952 | UPK1B | 1          |
| hsa-miR-761   | NM_006952 | UPK1B | 1          |
| hsa-miR-759   | NM_006952 | UPK1B | 1          |
| hsa-miR-675-  | NM_006952 | UPK1B | 1          |
| hsa-miR-298   | NM_006952 | UPK1B | 1          |
| hsa-miR-887-  | NM_006952 | UPK1B | 1          |
| hsa-miR-873-  | NM_006952 | UPK1B | 1          |
| hsa-miR-760   | NM_006952 | UPK1B | 1          |
| hsa-miR-937-  | NM_006952 | UPK1B | 1          |
| hsa-miR-1178  | NM_006952 | UPK1B | 1          |

|                        |       |   |
|------------------------|-------|---|
| hsa-miR-1182 NM_006952 | UPK1B | 1 |
| hsa-miR-1225 NM_006952 | UPK1B | 1 |
| hsa-miR-1227 NM_006952 | UPK1B | 1 |
| hsa-miR-1225 NM_006952 | UPK1B | 1 |
| hsa-miR-1236 NM_006952 | UPK1B | 1 |
| hsa-miR-1236 NM_006952 | UPK1B | 1 |
| hsa-miR-1237 NM_006952 | UPK1B | 1 |
| hsa-miR-1202 NM_006952 | UPK1B | 1 |
| hsa-miR-1287 NM_006952 | UPK1B | 1 |
| hsa-miR-1295 NM_006952 | UPK1B | 1 |
| hsa-miR-1303 NM_006952 | UPK1B | 1 |
| hsa-miR-1303 NM_006952 | UPK1B | 1 |
| hsa-miR-1304 NM_006952 | UPK1B | 1 |
| hsa-miR-1256 NM_006952 | UPK1B | 1 |
| hsa-miR-664a NM_006952 | UPK1B | 1 |
| hsa-miR-1905 NM_006952 | UPK1B | 1 |
| hsa-miR-1911 NM_006952 | UPK1B | 1 |
| hsa-miR-1972 NM_006952 | UPK1B | 1 |
| hsa-miR-2116 NM_006952 | UPK1B | 1 |
| hsa-miR-3126 NM_006952 | UPK1B | 1 |
| hsa-miR-3127 NM_006952 | UPK1B | 1 |
| hsa-miR-3131 NM_006952 | UPK1B | 1 |
| hsa-miR-3135 NM_006952 | UPK1B | 1 |
| hsa-miR-3141 NM_006952 | UPK1B | 1 |
| hsa-miR-3156 NM_006952 | UPK1B | 1 |
| hsa-miR-3157 NM_006952 | UPK1B | 1 |
| hsa-miR-3159 NM_006952 | UPK1B | 1 |
| hsa-miR-3161 NM_006952 | UPK1B | 1 |
| hsa-miR-3162 NM_006952 | UPK1B | 1 |
| hsa-miR-3173 NM_006952 | UPK1B | 1 |
| hsa-miR-3174 NM_006952 | UPK1B | 1 |
| hsa-miR-3183 NM_006952 | UPK1B | 1 |
| hsa-miR-3186 NM_006952 | UPK1B | 1 |
| hsa-miR-3186 NM_006952 | UPK1B | 1 |
| hsa-miR-3186 NM_006952 | UPK1B | 1 |
| hsa-miR-3198 NM_006952 | UPK1B | 1 |
| hsa-miR-378c NM_006952 | UPK1B | 1 |
| hsa-miR-4306 NM_006952 | UPK1B | 1 |
| hsa-miR-4257 NM_006952 | UPK1B | 1 |
| hsa-miR-4257 NM_006952 | UPK1B | 1 |
| hsa-miR-4326 NM_006952 | UPK1B | 1 |
| hsa-miR-4268 NM_006952 | UPK1B | 1 |
| hsa-miR-4281 NM_006952 | UPK1B | 1 |
| hsa-miR-4279 NM_006952 | UPK1B | 1 |
| hsa-miR-3605 NM_006952 | UPK1B | 1 |
| hsa-miR-3615 NM_006952 | UPK1B | 1 |
| hsa-miR-3617 NM_006952 | UPK1B | 1 |
| hsa-miR-3619 NM_006952 | UPK1B | 1 |
| hsa-miR-3620 NM_006952 | UPK1B | 1 |
| hsa-miR-3646 NM_006952 | UPK1B | 1 |
| hsa-miR-3663 NM_006952 | UPK1B | 1 |
| hsa-miR-3664 NM_006952 | UPK1B | 1 |
| hsa-miR-3664 NM_006952 | UPK1B | 1 |
| hsa-miR-3679 NM_006952 | UPK1B | 1 |
| hsa-miR-3689 NM_006952 | UPK1B | 1 |
| hsa-miR-3692 NM_006952 | UPK1B | 1 |
| hsa-miR-3689 NM_006952 | UPK1B | 1 |
| hsa-miR-3911 NM_006952 | UPK1B | 1 |
| hsa-miR-3918 NM_006952 | UPK1B | 1 |
| hsa-miR-3150 NM_006952 | UPK1B | 1 |
| hsa-miR-3922 NM_006952 | UPK1B | 1 |
| hsa-miR-3925 NM_006952 | UPK1B | 1 |
| hsa-miR-3927 NM_006952 | UPK1B | 1 |
| hsa-miR-3934 NM_006952 | UPK1B | 1 |
| hsa-miR-3934 NM_006952 | UPK1B | 1 |
| hsa-miR-4423 NM_006952 | UPK1B | 1 |
| hsa-miR-4423 NM_006952 | UPK1B | 1 |
| hsa-miR-4425 NM_006952 | UPK1B | 1 |
| hsa-miR-4428 NM_006952 | UPK1B | 1 |
| hsa-miR-444C NM_006952 | UPK1B | 1 |
| hsa-miR-4448 NM_006952 | UPK1B | 1 |
| hsa-miR-445C NM_006952 | UPK1B | 1 |
| hsa-miR-445C NM_006952 | UPK1B | 1 |
| hsa-miR-4458 NM_006952 | UPK1B | 1 |
| hsa-miR-4469 NM_006952 | UPK1B | 1 |
| hsa-miR-3689 NM_006952 | UPK1B | 1 |
| hsa-miR-4488 NM_006952 | UPK1B | 1 |
| hsa-miR-4506 NM_006952 | UPK1B | 1 |
| hsa-miR-4521 NM_006952 | UPK1B | 1 |
| hsa-miR-4533 NM_006952 | UPK1B | 1 |
| hsa-miR-378i NM_006952 | UPK1B | 1 |
| hsa-miR-4634 NM_006952 | UPK1B | 1 |
| hsa-miR-4646 NM_006952 | UPK1B | 1 |
| hsa-miR-4646 NM_006952 | UPK1B | 1 |
| hsa-miR-4648 NM_006952 | UPK1B | 1 |
| hsa-miR-4653 NM_006952 | UPK1B | 1 |
| hsa-miR-4654 NM_006952 | UPK1B | 1 |
| hsa-miR-4655 NM_006952 | UPK1B | 1 |
| hsa-miR-4658 NM_006952 | UPK1B | 1 |
| hsa-miR-466C NM_006952 | UPK1B | 1 |
| hsa-miR-4667 NM_006952 | UPK1B | 1 |
| hsa-miR-4669 NM_006952 | UPK1B | 1 |
| hsa-miR-4669 NM_006952 | UPK1B | 1 |
| hsa-miR-4673 NM_006952 | UPK1B | 1 |



|                         |         |            |
|-------------------------|---------|------------|
| hsa-miR-6803 NM_006952  | UPK1B   | 1          |
| hsa-miR-6812 NM_006952  | UPK1B   | 1          |
| hsa-miR-6812 NM_006952  | UPK1B   | 1          |
| hsa-miR-6813 NM_006952  | UPK1B   | 1          |
| hsa-miR-6820 NM_006952  | UPK1B   | 1          |
| hsa-miR-6824 NM_006952  | UPK1B   | 1          |
| hsa-miR-6825 NM_006952  | UPK1B   | 1          |
| hsa-miR-6827 NM_006952  | UPK1B   | 1          |
| hsa-miR-6835 NM_006952  | UPK1B   | 1          |
| hsa-miR-6780 NM_006952  | UPK1B   | 1          |
| hsa-miR-6836 NM_006952  | UPK1B   | 1          |
| hsa-miR-6840 NM_006952  | UPK1B   | 1          |
| hsa-miR-6842 NM_006952  | UPK1B   | 1          |
| hsa-miR-6842 NM_006952  | UPK1B   | 1          |
| hsa-miR-6843 NM_006952  | UPK1B   | 1          |
| hsa-miR-6847 NM_006952  | UPK1B   | 1          |
| hsa-miR-6848 NM_006952  | UPK1B   | 1          |
| hsa-miR-6849 NM_006952  | UPK1B   | 1          |
| hsa-miR-6851 NM_006952  | UPK1B   | 1          |
| hsa-miR-6853 NM_006952  | UPK1B   | 1          |
| hsa-miR-6853 NM_006952  | UPK1B   | 1          |
| hsa-miR-6855 NM_006952  | UPK1B   | 1          |
| hsa-miR-6855 NM_006952  | UPK1B   | 1          |
| hsa-miR-6863 NM_006952  | UPK1B   | 1          |
| hsa-miR-6871 NM_006952  | UPK1B   | 1          |
| hsa-miR-6874 NM_006952  | UPK1B   | 1          |
| hsa-miR-6875 NM_006952  | UPK1B   | 1          |
| hsa-miR-6877 NM_006952  | UPK1B   | 1          |
| hsa-miR-6877 NM_006952  | UPK1B   | 1          |
| hsa-miR-6887 NM_006952  | UPK1B   | 1          |
| hsa-miR-6889 NM_006952  | UPK1B   | 1          |
| hsa-miR-6894 NM_006952  | UPK1B   | 1          |
| hsa-miR-6894 NM_006952  | UPK1B   | 1          |
| hsa-miR-6895 NM_006952  | UPK1B   | 1          |
| hsa-miR-7106 NM_006952  | UPK1B   | 1          |
| hsa-miR-7109 NM_006952  | UPK1B   | 1          |
| hsa-miR-7110 NM_006952  | UPK1B   | 1          |
| hsa-miR-7110 NM_006952  | UPK1B   | 1          |
| hsa-miR-7111 NM_006952  | UPK1B   | 1          |
| hsa-miR-7151 NM_006952  | UPK1B   | 1          |
| hsa-miR-7157 NM_006952  | UPK1B   | 1          |
| hsa-miR-7161 NM_006952  | UPK1B   | 1          |
| hsa-miR-7706 NM_006952  | UPK1B   | 1          |
| hsa-miR-7854 NM_006952  | UPK1B   | 1          |
| hsa-miR-7974 NM_006952  | UPK1B   | 1          |
| hsa-miR-7977 NM_006952  | UPK1B   | 1          |
| hsa-miR-8052 NM_006952  | UPK1B   | 1          |
| hsa-miR-8052 NM_006952  | UPK1B   | 1          |
| hsa-miR-8072 NM_006952  | UPK1B   | 1          |
| hsa-miR-8085 NM_006952  | UPK1B   | 1          |
| hsa-miR-8085 NM_006952  | UPK1B   | 1          |
| hsa-miR-1022 NM_006952  | UPK1B   | 1          |
| hsa-miR-1039 NM_006952  | UPK1B   | 1          |
| hsa-miR-1040 NM_006952  | UPK1B   | 1          |
| hsa-miR-1052 NM_006952  | UPK1B   | 1          |
| hsa-miR-1140 NM_006952  | UPK1B   | 1          |
| hsa-miR-1212 NM_006952  | UPK1B   | 1          |
| hsa-miR-1212 NM_006952  | UPK1B   | 1          |
| hsa-miR-1212 NM_006952  | UPK1B   | 1          |
| hsa-miR-95-3j NM_007115 | TNFAIP6 | 0.96153846 |
| hsa-miR-6870 NM_007115  | TNFAIP6 | 0.96153846 |
| hsa-miR-497-1 NM_007115 | TNFAIP6 | 0.97435897 |
| hsa-miR-3138 NM_007115  | TNFAIP6 | 0.98076923 |
| hsa-miR-145-1 NM_007115 | TNFAIP6 | 1          |
| hsa-miR-553 NM_007115   | TNFAIP6 | 1          |
| hsa-miR-936 NM_007115   | TNFAIP6 | 1          |
| hsa-miR-1303 NM_007115  | TNFAIP6 | 1          |
| hsa-miR-1244 NM_007115  | TNFAIP6 | 1          |
| hsa-miR-1277 NM_007115  | TNFAIP6 | 1          |
| hsa-miR-3661 NM_007115  | TNFAIP6 | 1          |
| hsa-miR-3691 NM_007115  | TNFAIP6 | 1          |
| hsa-miR-3918 NM_007115  | TNFAIP6 | 1          |
| hsa-miR-4428 NM_007115  | TNFAIP6 | 1          |
| hsa-miR-4438 NM_007115  | TNFAIP6 | 1          |
| hsa-miR-4476 NM_007115  | TNFAIP6 | 1          |
| hsa-miR-2392 NM_007115  | TNFAIP6 | 1          |
| hsa-miR-4536 NM_007115  | TNFAIP6 | 1          |
| hsa-miR-3976 NM_007115  | TNFAIP6 | 1          |
| hsa-miR-4695 NM_007115  | TNFAIP6 | 1          |
| hsa-miR-4781 NM_007115  | TNFAIP6 | 1          |
| hsa-miR-5089 NM_007115  | TNFAIP6 | 1          |
| hsa-miR-5192 NM_007115  | TNFAIP6 | 1          |
| hsa-miR-4524 NM_007115  | TNFAIP6 | 1          |
| hsa-miR-6510 NM_007115  | TNFAIP6 | 1          |
| hsa-miR-6514 NM_007115  | TNFAIP6 | 1          |
| hsa-miR-6778 NM_007115  | TNFAIP6 | 1          |
| hsa-miR-6786 NM_007115  | TNFAIP6 | 1          |
| hsa-miR-6790 NM_007115  | TNFAIP6 | 1          |
| hsa-miR-6876 NM_007115  | TNFAIP6 | 1          |
| hsa-miR-7114 NM_007115  | TNFAIP6 | 1          |
| hsa-miR-7150 NM_007115  | TNFAIP6 | 1          |
| hsa-miR-6529 NM_007115  | TNFAIP6 | 1          |
| hsa-miR-4270 NM_007129  | ZIC2    | 0.95384615 |
| hsa-miR-6878 NM_007129  | ZIC2    | 0.96153846 |

|              |           |        |            |
|--------------|-----------|--------|------------|
| hsa-miR-204- | NM_007129 | ZIC2   | 1          |
| hsa-miR-30c- | NM_007129 | ZIC2   | 1          |
| hsa-miR-423- | NM_007129 | ZIC2   | 1          |
| hsa-miR-433- | NM_007129 | ZIC2   | 1          |
| hsa-miR-519c | NM_007129 | ZIC2   | 1          |
| hsa-miR-502- | NM_007129 | ZIC2   | 1          |
| hsa-miR-583  | NM_007129 | ZIC2   | 1          |
| hsa-miR-650  | NM_007129 | ZIC2   | 1          |
| hsa-miR-1185 | NM_007129 | ZIC2   | 1          |
| hsa-miR-765  | NM_007129 | ZIC2   | 1          |
| hsa-miR-892a | NM_007129 | ZIC2   | 1          |
| hsa-miR-543  | NM_007129 | ZIC2   | 1          |
| hsa-miR-1182 | NM_007129 | ZIC2   | 1          |
| hsa-miR-1182 | NM_007129 | ZIC2   | 1          |
| hsa-miR-1324 | NM_007129 | ZIC2   | 1          |
| hsa-miR-1908 | NM_007129 | ZIC2   | 1          |
| hsa-miR-191C | NM_007129 | ZIC2   | 1          |
| hsa-miR-3136 | NM_007129 | ZIC2   | 1          |
| hsa-miR-316C | NM_007129 | ZIC2   | 1          |
| hsa-miR-3175 | NM_007129 | ZIC2   | 1          |
| hsa-miR-3195 | NM_007129 | ZIC2   | 1          |
| hsa-miR-4271 | NM_007129 | ZIC2   | 1          |
| hsa-miR-3622 | NM_007129 | ZIC2   | 1          |
| hsa-miR-4423 | NM_007129 | ZIC2   | 1          |
| hsa-miR-4428 | NM_007129 | ZIC2   | 1          |
| hsa-miR-4441 | NM_007129 | ZIC2   | 1          |
| hsa-miR-4468 | NM_007129 | ZIC2   | 1          |
| hsa-miR-4493 | NM_007129 | ZIC2   | 1          |
| hsa-miR-2392 | NM_007129 | ZIC2   | 1          |
| hsa-miR-4534 | NM_007129 | ZIC2   | 1          |
| hsa-miR-4647 | NM_007129 | ZIC2   | 1          |
| hsa-miR-4687 | NM_007129 | ZIC2   | 1          |
| hsa-miR-4706 | NM_007129 | ZIC2   | 1          |
| hsa-miR-4713 | NM_007129 | ZIC2   | 1          |
| hsa-miR-4748 | NM_007129 | ZIC2   | 1          |
| hsa-miR-4761 | NM_007129 | ZIC2   | 1          |
| hsa-miR-1245 | NM_007129 | ZIC2   | 1          |
| hsa-miR-5186 | NM_007129 | ZIC2   | 1          |
| hsa-miR-5581 | NM_007129 | ZIC2   | 1          |
| hsa-miR-5787 | NM_007129 | ZIC2   | 1          |
| hsa-miR-6165 | NM_007129 | ZIC2   | 1          |
| hsa-miR-6507 | NM_007129 | ZIC2   | 1          |
| hsa-miR-651C | NM_007129 | ZIC2   | 1          |
| hsa-miR-6515 | NM_007129 | ZIC2   | 1          |
| hsa-miR-673C | NM_007129 | ZIC2   | 1          |
| hsa-miR-6735 | NM_007129 | ZIC2   | 1          |
| hsa-miR-6748 | NM_007129 | ZIC2   | 1          |
| hsa-miR-6756 | NM_007129 | ZIC2   | 1          |
| hsa-miR-6757 | NM_007129 | ZIC2   | 1          |
| hsa-miR-6758 | NM_007129 | ZIC2   | 1          |
| hsa-miR-6765 | NM_007129 | ZIC2   | 1          |
| hsa-miR-678C | NM_007129 | ZIC2   | 1          |
| hsa-miR-6782 | NM_007129 | ZIC2   | 1          |
| hsa-miR-6788 | NM_007129 | ZIC2   | 1          |
| hsa-miR-679C | NM_007129 | ZIC2   | 1          |
| hsa-miR-6797 | NM_007129 | ZIC2   | 1          |
| hsa-miR-6812 | NM_007129 | ZIC2   | 1          |
| hsa-miR-6834 | NM_007129 | ZIC2   | 1          |
| hsa-miR-6846 | NM_007129 | ZIC2   | 1          |
| hsa-miR-6876 | NM_007129 | ZIC2   | 1          |
| hsa-miR-6891 | NM_007129 | ZIC2   | 1          |
| hsa-miR-7111 | NM_007129 | ZIC2   | 1          |
| hsa-miR-7515 | NM_007129 | ZIC2   | 1          |
| hsa-miR-8071 | NM_007129 | ZIC2   | 1          |
| hsa-miR-8088 | NM_007129 | ZIC2   | 1          |
| hsa-miR-1211 | NM_007129 | ZIC2   | 1          |
| hsa-miR-3154 | NM_013378 | VPREB3 | 0.96153846 |
| hsa-miR-6756 | NM_013378 | VPREB3 | 0.96153846 |
| hsa-miR-6857 | NM_013378 | VPREB3 | 0.96153846 |
| hsa-miR-687C | NM_013378 | VPREB3 | 0.96153846 |
| hsa-miR-5194 | NM_013378 | VPREB3 | 0.98076923 |
| hsa-miR-6745 | NM_013378 | VPREB3 | 0.98076923 |
| hsa-miR-4433 | NM_013378 | VPREB3 | 0.98076923 |
| hsa-miR-1273 | NM_013378 | VPREB3 | 0.98076923 |
| hsa-miR-197- | NM_013378 | VPREB3 | 1          |
| hsa-miR-198  | NM_013378 | VPREB3 | 1          |
| hsa-miR-204- | NM_013378 | VPREB3 | 1          |
| hsa-miR-30b- | NM_013378 | VPREB3 | 1          |
| hsa-miR-296- | NM_013378 | VPREB3 | 1          |
| hsa-miR-371a | NM_013378 | VPREB3 | 1          |
| hsa-miR-422a | NM_013378 | VPREB3 | 1          |
| hsa-miR-423- | NM_013378 | VPREB3 | 1          |
| hsa-miR-423- | NM_013378 | VPREB3 | 1          |
| hsa-miR-658  | NM_013378 | VPREB3 | 1          |
| hsa-miR-320c | NM_013378 | VPREB3 | 1          |
| hsa-miR-769- | NM_013378 | VPREB3 | 1          |
| hsa-miR-765  | NM_013378 | VPREB3 | 1          |
| hsa-miR-770- | NM_013378 | VPREB3 | 1          |
| hsa-miR-675- | NM_013378 | VPREB3 | 1          |
| hsa-miR-118C | NM_013378 | VPREB3 | 1          |
| hsa-miR-1182 | NM_013378 | VPREB3 | 1          |
| hsa-miR-1225 | NM_013378 | VPREB3 | 1          |
| hsa-miR-1233 | NM_013378 | VPREB3 | 1          |
| hsa-miR-1237 | NM_013378 | VPREB3 | 1          |

|                         |        |            |
|-------------------------|--------|------------|
| hsa-miR-1275 NM_013378  | VPREB3 | 1          |
| hsa-miR-1908 NM_013378  | VPREB3 | 1          |
| hsa-miR-3132 NM_013378  | VPREB3 | 1          |
| hsa-miR-3132 NM_013378  | VPREB3 | 1          |
| hsa-miR-3151 NM_013378  | VPREB3 | 1          |
| hsa-miR-3153 NM_013378  | VPREB3 | 1          |
| hsa-miR-3162 NM_013378  | VPREB3 | 1          |
| hsa-miR-3180 NM_013378  | VPREB3 | 1          |
| hsa-miR-3190 NM_013378  | VPREB3 | 1          |
| hsa-miR-3197 NM_013378  | VPREB3 | 1          |
| hsa-miR-4325 NM_013378  | VPREB3 | 1          |
| hsa-miR-3605 NM_013378  | VPREB3 | 1          |
| hsa-miR-3610 NM_013378  | VPREB3 | 1          |
| hsa-miR-3612 NM_013378  | VPREB3 | 1          |
| hsa-miR-3645 NM_013378  | VPREB3 | 1          |
| hsa-miR-3934 NM_013378  | VPREB3 | 1          |
| hsa-miR-4433 NM_013378  | VPREB3 | 1          |
| hsa-miR-4437 NM_013378  | VPREB3 | 1          |
| hsa-miR-4448 NM_013378  | VPREB3 | 1          |
| hsa-miR-4450 NM_013378  | VPREB3 | 1          |
| hsa-miR-4476 NM_013378  | VPREB3 | 1          |
| hsa-miR-3689 NM_013378  | VPREB3 | 1          |
| hsa-miR-3960 NM_013378  | VPREB3 | 1          |
| hsa-miR-4632 NM_013378  | VPREB3 | 1          |
| hsa-miR-4653 NM_013378  | VPREB3 | 1          |
| hsa-miR-4657 NM_013378  | VPREB3 | 1          |
| hsa-miR-4665 NM_013378  | VPREB3 | 1          |
| hsa-miR-4688 NM_013378  | VPREB3 | 1          |
| hsa-miR-4695 NM_013378  | VPREB3 | 1          |
| hsa-miR-4713 NM_013378  | VPREB3 | 1          |
| hsa-miR-4716 NM_013378  | VPREB3 | 1          |
| hsa-miR-122b NM_013378  | VPREB3 | 1          |
| hsa-miR-4747 NM_013378  | VPREB3 | 1          |
| hsa-miR-4748 NM_013378  | VPREB3 | 1          |
| hsa-miR-4750 NM_013378  | VPREB3 | 1          |
| hsa-miR-4758 NM_013378  | VPREB3 | 1          |
| hsa-miR-4769 NM_013378  | VPREB3 | 1          |
| hsa-miR-5010 NM_013378  | VPREB3 | 1          |
| hsa-miR-5088 NM_013378  | VPREB3 | 1          |
| hsa-miR-5090 NM_013378  | VPREB3 | 1          |
| hsa-miR-5693 NM_013378  | VPREB3 | 1          |
| hsa-miR-5698 NM_013378  | VPREB3 | 1          |
| hsa-miR-6086 NM_013378  | VPREB3 | 1          |
| hsa-miR-6088 NM_013378  | VPREB3 | 1          |
| hsa-miR-6090 NM_013378  | VPREB3 | 1          |
| hsa-miR-6124 NM_013378  | VPREB3 | 1          |
| hsa-miR-6165 NM_013378  | VPREB3 | 1          |
| hsa-miR-6510 NM_013378  | VPREB3 | 1          |
| hsa-miR-6511 NM_013378  | VPREB3 | 1          |
| hsa-miR-6716 NM_013378  | VPREB3 | 1          |
| hsa-miR-6730 NM_013378  | VPREB3 | 1          |
| hsa-miR-6734 NM_013378  | VPREB3 | 1          |
| hsa-miR-6735 NM_013378  | VPREB3 | 1          |
| hsa-miR-6738 NM_013378  | VPREB3 | 1          |
| hsa-miR-6743 NM_013378  | VPREB3 | 1          |
| hsa-miR-6752 NM_013378  | VPREB3 | 1          |
| hsa-miR-6754 NM_013378  | VPREB3 | 1          |
| hsa-miR-6758 NM_013378  | VPREB3 | 1          |
| hsa-miR-6764 NM_013378  | VPREB3 | 1          |
| hsa-miR-6773 NM_013378  | VPREB3 | 1          |
| hsa-miR-6780 NM_013378  | VPREB3 | 1          |
| hsa-miR-6782 NM_013378  | VPREB3 | 1          |
| hsa-miR-6787 NM_013378  | VPREB3 | 1          |
| hsa-miR-6789 NM_013378  | VPREB3 | 1          |
| hsa-miR-6793 NM_013378  | VPREB3 | 1          |
| hsa-miR-6795 NM_013378  | VPREB3 | 1          |
| hsa-miR-6800 NM_013378  | VPREB3 | 1          |
| hsa-miR-6802 NM_013378  | VPREB3 | 1          |
| hsa-miR-6812 NM_013378  | VPREB3 | 1          |
| hsa-miR-6819 NM_013378  | VPREB3 | 1          |
| hsa-miR-6835 NM_013378  | VPREB3 | 1          |
| hsa-miR-6846 NM_013378  | VPREB3 | 1          |
| hsa-miR-6875 NM_013378  | VPREB3 | 1          |
| hsa-miR-6892 NM_013378  | VPREB3 | 1          |
| hsa-miR-7106 NM_013378  | VPREB3 | 1          |
| hsa-miR-7110 NM_013378  | VPREB3 | 1          |
| hsa-miR-7150 NM_013378  | VPREB3 | 1          |
| hsa-miR-7845 NM_013378  | VPREB3 | 1          |
| hsa-miR-8071 NM_013378  | VPREB3 | 1          |
| hsa-miR-8089 NM_013378  | VPREB3 | 1          |
| hsa-miR-1039 NM_013378  | VPREB3 | 1          |
| hsa-miR-1039 NM_013378  | VPREB3 | 1          |
| hsa-miR-1118 NM_013378  | VPREB3 | 1          |
| hsa-miR-1211 NM_013378  | VPREB3 | 1          |
| hsa-miR-3158 NM_014466  | TEKT2  | 0.96153846 |
| hsa-miR-6867 NM_014466  | TEKT2  | 0.96923077 |
| hsa-miR-328- NM_014466  | TEKT2  | 0.98076923 |
| hsa-let-7b-3p NM_014466 | TEKT2  | 1          |
| hsa-let-7d-3p NM_014466 | TEKT2  | 1          |
| hsa-miR-18a- NM_014466  | TEKT2  | 1          |

|              |           |       |            |
|--------------|-----------|-------|------------|
| hsa-miR-24-2 | NM_014466 | TEKT2 | 1          |
| hsa-miR-181a | NM_014466 | TEKT2 | 1          |
| hsa-miR-125a | NM_014466 | TEKT2 | 1          |
| hsa-miR-296- | NM_014466 | TEKT2 | 1          |
| hsa-miR-326  | NM_014466 | TEKT2 | 1          |
| hsa-miR-329- | NM_014466 | TEKT2 | 1          |
| hsa-miR-92b- | NM_014466 | TEKT2 | 1          |
| hsa-miR-596  | NM_014466 | TEKT2 | 1          |
| hsa-miR-618  | NM_014466 | TEKT2 | 1          |
| hsa-miR-634  | NM_014466 | TEKT2 | 1          |
| hsa-miR-636  | NM_014466 | TEKT2 | 1          |
| hsa-miR-1224 | NM_014466 | TEKT2 | 1          |
| hsa-miR-744- | NM_014466 | TEKT2 | 1          |
| hsa-miR-941  | NM_014466 | TEKT2 | 1          |
| hsa-miR-1178 | NM_014466 | TEKT2 | 1          |
| hsa-miR-1181 | NM_014466 | TEKT2 | 1          |
| hsa-miR-1233 | NM_014466 | TEKT2 | 1          |
| hsa-miR-1285 | NM_014466 | TEKT2 | 1          |
| hsa-miR-1284 | NM_014466 | TEKT2 | 1          |
| hsa-miR-147C | NM_014466 | TEKT2 | 1          |
| hsa-miR-1825 | NM_014466 | TEKT2 | 1          |
| hsa-miR-2114 | NM_014466 | TEKT2 | 1          |
| hsa-miR-2116 | NM_014466 | TEKT2 | 1          |
| hsa-miR-3194 | NM_014466 | TEKT2 | 1          |
| hsa-miR-4313 | NM_014466 | TEKT2 | 1          |
| hsa-miR-3622 | NM_014466 | TEKT2 | 1          |
| hsa-miR-3685 | NM_014466 | TEKT2 | 1          |
| hsa-miR-3922 | NM_014466 | TEKT2 | 1          |
| hsa-miR-464C | NM_014466 | TEKT2 | 1          |
| hsa-miR-4649 | NM_014466 | TEKT2 | 1          |
| hsa-miR-4667 | NM_014466 | TEKT2 | 1          |
| hsa-miR-4683 | NM_014466 | TEKT2 | 1          |
| hsa-miR-469C | NM_014466 | TEKT2 | 1          |
| hsa-miR-4695 | NM_014466 | TEKT2 | 1          |
| hsa-miR-4723 | NM_014466 | TEKT2 | 1          |
| hsa-miR-122b | NM_014466 | TEKT2 | 1          |
| hsa-miR-4747 | NM_014466 | TEKT2 | 1          |
| hsa-miR-475C | NM_014466 | TEKT2 | 1          |
| hsa-miR-4778 | NM_014466 | TEKT2 | 1          |
| hsa-miR-4787 | NM_014466 | TEKT2 | 1          |
| hsa-miR-4804 | NM_014466 | TEKT2 | 1          |
| hsa-miR-5196 | NM_014466 | TEKT2 | 1          |
| hsa-miR-5584 | NM_014466 | TEKT2 | 1          |
| hsa-miR-1295 | NM_014466 | TEKT2 | 1          |
| hsa-miR-5695 | NM_014466 | TEKT2 | 1          |
| hsa-miR-6722 | NM_014466 | TEKT2 | 1          |
| hsa-miR-6727 | NM_014466 | TEKT2 | 1          |
| hsa-miR-6732 | NM_014466 | TEKT2 | 1          |
| hsa-miR-6738 | NM_014466 | TEKT2 | 1          |
| hsa-miR-6747 | NM_014466 | TEKT2 | 1          |
| hsa-miR-6749 | NM_014466 | TEKT2 | 1          |
| hsa-miR-6752 | NM_014466 | TEKT2 | 1          |
| hsa-miR-6754 | NM_014466 | TEKT2 | 1          |
| hsa-miR-6758 | NM_014466 | TEKT2 | 1          |
| hsa-miR-6765 | NM_014466 | TEKT2 | 1          |
| hsa-miR-6766 | NM_014466 | TEKT2 | 1          |
| hsa-miR-6769 | NM_014466 | TEKT2 | 1          |
| hsa-miR-6786 | NM_014466 | TEKT2 | 1          |
| hsa-miR-6792 | NM_014466 | TEKT2 | 1          |
| hsa-miR-6793 | NM_014466 | TEKT2 | 1          |
| hsa-miR-6794 | NM_014466 | TEKT2 | 1          |
| hsa-miR-6795 | NM_014466 | TEKT2 | 1          |
| hsa-miR-6809 | NM_014466 | TEKT2 | 1          |
| hsa-miR-6812 | NM_014466 | TEKT2 | 1          |
| hsa-miR-6813 | NM_014466 | TEKT2 | 1          |
| hsa-miR-6815 | NM_014466 | TEKT2 | 1          |
| hsa-miR-6823 | NM_014466 | TEKT2 | 1          |
| hsa-miR-6825 | NM_014466 | TEKT2 | 1          |
| hsa-miR-6826 | NM_014466 | TEKT2 | 1          |
| hsa-miR-6836 | NM_014466 | TEKT2 | 1          |
| hsa-miR-6845 | NM_014466 | TEKT2 | 1          |
| hsa-miR-6847 | NM_014466 | TEKT2 | 1          |
| hsa-miR-6849 | NM_014466 | TEKT2 | 1          |
| hsa-miR-6862 | NM_014466 | TEKT2 | 1          |
| hsa-miR-6873 | NM_014466 | TEKT2 | 1          |
| hsa-miR-6877 | NM_014466 | TEKT2 | 1          |
| hsa-miR-6882 | NM_014466 | TEKT2 | 1          |
| hsa-miR-6887 | NM_014466 | TEKT2 | 1          |
| hsa-miR-6891 | NM_014466 | TEKT2 | 1          |
| hsa-miR-6892 | NM_014466 | TEKT2 | 1          |
| hsa-miR-7109 | NM_014466 | TEKT2 | 1          |
| hsa-miR-7112 | NM_014466 | TEKT2 | 1          |
| hsa-miR-7703 | NM_014466 | TEKT2 | 1          |
| hsa-miR-4433 | NM_014466 | TEKT2 | 1          |
| hsa-miR-7848 | NM_014466 | TEKT2 | 1          |
| hsa-miR-1211 | NM_014466 | TEKT2 | 1          |
| hsa-miR-6891 | NM_015653 | RIBC2 | 0.96153846 |
| hsa-miR-149- | NM_015653 | RIBC2 | 1          |
| hsa-miR-513a | NM_015653 | RIBC2 | 1          |
| hsa-miR-1236 | NM_015653 | RIBC2 | 1          |
| hsa-miR-4428 | NM_015653 | RIBC2 | 1          |
| hsa-miR-470C | NM_015653 | RIBC2 | 1          |
| hsa-miR-4717 | NM_015653 | RIBC2 | 1          |
| hsa-miR-480C | NM_015653 | RIBC2 | 1          |

|                 |           |       |            |
|-----------------|-----------|-------|------------|
| hsa-miR-6833    | NM_015653 | RIBC2 | 1          |
| hsa-miR-6845    | NM_015653 | RIBC2 | 1          |
| hsa-miR-6851    | NM_015653 | RIBC2 | 1          |
| hsa-miR-18b-    | NM_016270 | KLF2  | 0.95384615 |
| hsa-miR-372-    | NM_016270 | KLF2  | 0.96153846 |
| hsa-miR-424-    | NM_016270 | KLF2  | 0.96153846 |
| hsa-miR-483-    | NM_016270 | KLF2  | 0.96153846 |
| hsa-miR-3170    | NM_016270 | KLF2  | 0.96153846 |
| hsa-miR-3685    | NM_016270 | KLF2  | 0.96153846 |
| hsa-miR-4732    | NM_016270 | KLF2  | 0.96153846 |
| hsa-miR-5587    | NM_016270 | KLF2  | 0.96153846 |
| hsa-miR-6133    | NM_016270 | KLF2  | 0.96153846 |
| hsa-miR-1224    | NM_016270 | KLF2  | 0.97435897 |
| hsa-miR-3191    | NM_016270 | KLF2  | 0.97435897 |
| hsa-miR-6773    | NM_016270 | KLF2  | 0.97435897 |
| hsa-miR-4695    | NM_016270 | KLF2  | 0.98076923 |
| hsa-miR-4776    | NM_016270 | KLF2  | 0.98076923 |
| hsa-miR-651C    | NM_016270 | KLF2  | 0.98076923 |
| hsa-miR-6822    | NM_016270 | KLF2  | 0.98076923 |
| hsa-miR-569C    | NM_016270 | KLF2  | 0.99145299 |
| hsa-let-7f-2-3j | NM_016270 | KLF2  | 1          |
| hsa-miR-20a-    | NM_016270 | KLF2  | 1          |
| hsa-miR-26a-    | NM_016270 | KLF2  | 1          |
| hsa-miR-33a-    | NM_016270 | KLF2  | 1          |
| hsa-miR-30c-    | NM_016270 | KLF2  | 1          |
| hsa-miR-30c-    | NM_016270 | KLF2  | 1          |
| hsa-miR-222-    | NM_016270 | KLF2  | 1          |
| hsa-miR-200b    | NM_016270 | KLF2  | 1          |
| hsa-miR-23b-    | NM_016270 | KLF2  | 1          |
| hsa-miR-122-    | NM_016270 | KLF2  | 1          |
| hsa-miR-132-    | NM_016270 | KLF2  | 1          |
| hsa-miR-125b    | NM_016270 | KLF2  | 1          |
| hsa-miR-150-    | NM_016270 | KLF2  | 1          |
| hsa-miR-150-    | NM_016270 | KLF2  | 1          |
| hsa-miR-30c-    | NM_016270 | KLF2  | 1          |
| hsa-miR-30c-    | NM_016270 | KLF2  | 1          |
| hsa-miR-34b-    | NM_016270 | KLF2  | 1          |
| hsa-miR-296-    | NM_016270 | KLF2  | 1          |
| hsa-miR-296-    | NM_016270 | KLF2  | 1          |
| hsa-miR-361-    | NM_016270 | KLF2  | 1          |
| hsa-miR-302c    | NM_016270 | KLF2  | 1          |
| hsa-miR-376c    | NM_016270 | KLF2  | 1          |
| hsa-miR-330-    | NM_016270 | KLF2  | 1          |
| hsa-miR-328-    | NM_016270 | KLF2  | 1          |
| hsa-miR-331-    | NM_016270 | KLF2  | 1          |
| hsa-miR-339-    | NM_016270 | KLF2  | 1          |
| hsa-miR-20b-    | NM_016270 | KLF2  | 1          |
| hsa-miR-484     | NM_016270 | KLF2  | 1          |
| hsa-miR-520f    | NM_016270 | KLF2  | 1          |
| hsa-miR-525-    | NM_016270 | KLF2  | 1          |
| hsa-miR-520c    | NM_016270 | KLF2  | 1          |
| hsa-miR-518c    | NM_016270 | KLF2  | 1          |
| hsa-miR-517a    | NM_016270 | KLF2  | 1          |
| hsa-miR-517b    | NM_016270 | KLF2  | 1          |
| hsa-miR-517c    | NM_016270 | KLF2  | 1          |
| hsa-miR-505-    | NM_016270 | KLF2  | 1          |
| hsa-miR-506-    | NM_016270 | KLF2  | 1          |
| hsa-miR-508-    | NM_016270 | KLF2  | 1          |
| hsa-miR-509-    | NM_016270 | KLF2  | 1          |
| hsa-miR-510-    | NM_016270 | KLF2  | 1          |
| hsa-miR-514a    | NM_016270 | KLF2  | 1          |
| hsa-miR-532-    | NM_016270 | KLF2  | 1          |
| hsa-miR-571     | NM_016270 | KLF2  | 1          |
| hsa-miR-578     | NM_016270 | KLF2  | 1          |
| hsa-miR-581     | NM_016270 | KLF2  | 1          |
| hsa-miR-584-    | NM_016270 | KLF2  | 1          |
| hsa-miR-584-    | NM_016270 | KLF2  | 1          |
| hsa-miR-618     | NM_016270 | KLF2  | 1          |
| hsa-miR-626     | NM_016270 | KLF2  | 1          |
| hsa-miR-645     | NM_016270 | KLF2  | 1          |
| hsa-miR-449b    | NM_016270 | KLF2  | 1          |
| hsa-miR-449c    | NM_016270 | KLF2  | 1          |
| hsa-miR-660-    | NM_016270 | KLF2  | 1          |
| hsa-miR-758-    | NM_016270 | KLF2  | 1          |
| hsa-miR-1296    | NM_016270 | KLF2  | 1          |
| hsa-miR-1271    | NM_016270 | KLF2  | 1          |
| hsa-miR-769-    | NM_016270 | KLF2  | 1          |
| hsa-miR-1298    | NM_016270 | KLF2  | 1          |
| hsa-miR-2113    | NM_016270 | KLF2  | 1          |
| hsa-miR-761     | NM_016270 | KLF2  | 1          |
| hsa-miR-298     | NM_016270 | KLF2  | 1          |
| hsa-miR-885-    | NM_016270 | KLF2  | 1          |
| hsa-miR-877-    | NM_016270 | KLF2  | 1          |
| hsa-miR-665     | NM_016270 | KLF2  | 1          |
| hsa-miR-374b    | NM_016270 | KLF2  | 1          |
| hsa-miR-760     | NM_016270 | KLF2  | 1          |
| hsa-miR-208b    | NM_016270 | KLF2  | 1          |
| hsa-miR-920     | NM_016270 | KLF2  | 1          |
| hsa-miR-922     | NM_016270 | KLF2  | 1          |
| hsa-miR-938     | NM_016270 | KLF2  | 1          |
| hsa-miR-940     | NM_016270 | KLF2  | 1          |
| hsa-miR-1182    | NM_016270 | KLF2  | 1          |
| hsa-miR-1182    | NM_016270 | KLF2  | 1          |
| hsa-miR-1233    | NM_016270 | KLF2  | 1          |



|                        |      |   |
|------------------------|------|---|
| hsa-miR-1238 NM_016270 | KLF2 | 1 |
| hsa-miR-1202 NM_016270 | KLF2 | 1 |
| hsa-miR-1207 NM_016270 | KLF2 | 1 |
| hsa-miR-1207 NM_016270 | KLF2 | 1 |
| hsa-miR-1285 NM_016270 | KLF2 | 1 |
| hsa-miR-1287 NM_016270 | KLF2 | 1 |
| hsa-miR-1293 NM_016270 | KLF2 | 1 |
| hsa-miR-1304 NM_016270 | KLF2 | 1 |
| hsa-miR-1245 NM_016270 | KLF2 | 1 |
| hsa-miR-1251 NM_016270 | KLF2 | 1 |
| hsa-miR-1258 NM_016270 | KLF2 | 1 |
| hsa-miR-1260 NM_016270 | KLF2 | 1 |
| hsa-miR-1266 NM_016270 | KLF2 | 1 |
| hsa-miR-1275 NM_016270 | KLF2 | 1 |
| hsa-miR-513t NM_016270 | KLF2 | 1 |
| hsa-miR-1911 NM_016270 | KLF2 | 1 |
| hsa-miR-1914 NM_016270 | KLF2 | 1 |
| hsa-miR-1972 NM_016270 | KLF2 | 1 |
| hsa-miR-2682 NM_016270 | KLF2 | 1 |
| hsa-miR-3121 NM_016270 | KLF2 | 1 |
| hsa-miR-3124 NM_016270 | KLF2 | 1 |
| hsa-miR-3132 NM_016270 | KLF2 | 1 |
| hsa-miR-378t NM_016270 | KLF2 | 1 |
| hsa-miR-3135 NM_016270 | KLF2 | 1 |
| hsa-miR-548t NM_016270 | KLF2 | 1 |
| hsa-miR-3152 NM_016270 | KLF2 | 1 |
| hsa-miR-3157 NM_016270 | KLF2 | 1 |
| hsa-miR-3166 NM_016270 | KLF2 | 1 |
| hsa-miR-1260 NM_016270 | KLF2 | 1 |
| hsa-miR-3169 NM_016270 | KLF2 | 1 |
| hsa-miR-3173 NM_016270 | KLF2 | 1 |
| hsa-miR-3180 NM_016270 | KLF2 | 1 |
| hsa-miR-3184 NM_016270 | KLF2 | 1 |
| hsa-miR-3184 NM_016270 | KLF2 | 1 |
| hsa-miR-3190 NM_016270 | KLF2 | 1 |
| hsa-miR-3190 NM_016270 | KLF2 | 1 |
| hsa-miR-3192 NM_016270 | KLF2 | 1 |
| hsa-miR-3192 NM_016270 | KLF2 | 1 |
| hsa-miR-3198 NM_016270 | KLF2 | 1 |
| hsa-miR-3198 NM_016270 | KLF2 | 1 |
| hsa-miR-3202 NM_016270 | KLF2 | 1 |
| hsa-miR-4297 NM_016270 | KLF2 | 1 |
| hsa-miR-4305 NM_016270 | KLF2 | 1 |
| hsa-miR-4313 NM_016270 | KLF2 | 1 |
| hsa-miR-4265 NM_016270 | KLF2 | 1 |
| hsa-miR-4281 NM_016270 | KLF2 | 1 |
| hsa-miR-4277 NM_016270 | KLF2 | 1 |
| hsa-miR-4278 NM_016270 | KLF2 | 1 |
| hsa-miR-4290 NM_016270 | KLF2 | 1 |
| hsa-miR-4325 NM_016270 | KLF2 | 1 |
| hsa-miR-3605 NM_016270 | KLF2 | 1 |
| hsa-miR-3615 NM_016270 | KLF2 | 1 |
| hsa-miR-3670 NM_016270 | KLF2 | 1 |
| hsa-miR-3670 NM_016270 | KLF2 | 1 |
| hsa-miR-3675 NM_016270 | KLF2 | 1 |
| hsa-miR-3685 NM_016270 | KLF2 | 1 |
| hsa-miR-3685 NM_016270 | KLF2 | 1 |
| hsa-miR-3907 NM_016270 | KLF2 | 1 |
| hsa-miR-3685 NM_016270 | KLF2 | 1 |
| hsa-miR-3905 NM_016270 | KLF2 | 1 |
| hsa-miR-3911 NM_016270 | KLF2 | 1 |
| hsa-miR-3150 NM_016270 | KLF2 | 1 |
| hsa-miR-3926 NM_016270 | KLF2 | 1 |
| hsa-miR-3927 NM_016270 | KLF2 | 1 |
| hsa-miR-3937 NM_016270 | KLF2 | 1 |
| hsa-miR-3943 NM_016270 | KLF2 | 1 |
| hsa-miR-550t NM_016270 | KLF2 | 1 |
| hsa-miR-378g NM_016270 | KLF2 | 1 |
| hsa-miR-4436 NM_016270 | KLF2 | 1 |
| hsa-miR-4441 NM_016270 | KLF2 | 1 |
| hsa-miR-4457 NM_016270 | KLF2 | 1 |
| hsa-miR-4465 NM_016270 | KLF2 | 1 |
| hsa-miR-4475 NM_016270 | KLF2 | 1 |
| hsa-miR-3685 NM_016270 | KLF2 | 1 |
| hsa-miR-4481 NM_016270 | KLF2 | 1 |
| hsa-miR-4498 NM_016270 | KLF2 | 1 |
| hsa-miR-4510 NM_016270 | KLF2 | 1 |
| hsa-miR-4514 NM_016270 | KLF2 | 1 |
| hsa-miR-4515 NM_016270 | KLF2 | 1 |
| hsa-miR-4534 NM_016270 | KLF2 | 1 |
| hsa-miR-4535 NM_016270 | KLF2 | 1 |
| hsa-miR-4633 NM_016270 | KLF2 | 1 |
| hsa-miR-4654 NM_016270 | KLF2 | 1 |
| hsa-miR-4662 NM_016270 | KLF2 | 1 |
| hsa-miR-4680 NM_016270 | KLF2 | 1 |
| hsa-miR-4692 NM_016270 | KLF2 | 1 |
| hsa-miR-4708 NM_016270 | KLF2 | 1 |
| hsa-miR-4705 NM_016270 | KLF2 | 1 |
| hsa-miR-4727 NM_016270 | KLF2 | 1 |
| hsa-miR-4733 NM_016270 | KLF2 | 1 |
| hsa-miR-3064 NM_016270 | KLF2 | 1 |
| hsa-miR-4745 NM_016270 | KLF2 | 1 |
| hsa-miR-4746 NM_016270 | KLF2 | 1 |
| hsa-miR-4756 NM_016270 | KLF2 | 1 |
| hsa-miR-4756 NM_016270 | KLF2 | 1 |



|                         |       |            |
|-------------------------|-------|------------|
| hsa-miR-7107 NM_016270  | KLF2  | 1          |
| hsa-miR-7109 NM_016270  | KLF2  | 1          |
| hsa-miR-7109 NM_016270  | KLF2  | 1          |
| hsa-miR-711C NM_016270  | KLF2  | 1          |
| hsa-miR-7111 NM_016270  | KLF2  | 1          |
| hsa-miR-7112 NM_016270  | KLF2  | 1          |
| hsa-miR-715C NM_016270  | KLF2  | 1          |
| hsa-miR-7151 NM_016270  | KLF2  | 1          |
| hsa-miR-7154 NM_016270  | KLF2  | 1          |
| hsa-miR-7156 NM_016270  | KLF2  | 1          |
| hsa-miR-7156 NM_016270  | KLF2  | 1          |
| hsa-miR-7703 NM_016270  | KLF2  | 1          |
| hsa-miR-7843 NM_016270  | KLF2  | 1          |
| hsa-miR-7845 NM_016270  | KLF2  | 1          |
| hsa-miR-7846 NM_016270  | KLF2  | 1          |
| hsa-miR-8078 NM_016270  | KLF2  | 1          |
| hsa-miR-9985 NM_016270  | KLF2  | 1          |
| hsa-miR-1022 NM_016270  | KLF2  | 1          |
| hsa-miR-1039 NM_016270  | KLF2  | 1          |
| hsa-miR-9851 NM_016270  | KLF2  | 1          |
| hsa-miR-1211 NM_016270  | KLF2  | 1          |
| hsa-miR-1212 NM_016270  | KLF2  | 1          |
| hsa-miR-1213 NM_016270  | KLF2  | 1          |
| hsa-miR-210-1 NM_016343 | CENPF | 1          |
| hsa-miR-143-1 NM_016343 | CENPF | 1          |
| hsa-miR-101-1 NM_016343 | CENPF | 1          |
| hsa-miR-361-1 NM_016343 | CENPF | 1          |
| hsa-miR-365b NM_016343  | CENPF | 1          |
| hsa-miR-302b NM_016343  | CENPF | 1          |
| hsa-miR-324-1 NM_016343 | CENPF | 1          |
| hsa-miR-339-1 NM_016343 | CENPF | 1          |
| hsa-miR-345-1 NM_016343 | CENPF | 1          |
| hsa-miR-498-1 NM_016343 | CENPF | 1          |
| hsa-miR-520a NM_016343  | CENPF | 1          |
| hsa-miR-525-1 NM_016343 | CENPF | 1          |
| hsa-miR-523-1 NM_016343 | CENPF | 1          |
| hsa-miR-517-1 NM_016343 | CENPF | 1          |
| hsa-miR-455-1 NM_016343 | CENPF | 1          |
| hsa-miR-574-1 NM_016343 | CENPF | 1          |
| hsa-miR-574-1 NM_016343 | CENPF | 1          |
| hsa-miR-769-1 NM_016343 | CENPF | 1          |
| hsa-miR-675-1 NM_016343 | CENPF | 1          |
| hsa-miR-874-1 NM_016343 | CENPF | 1          |
| hsa-miR-541-1 NM_016343 | CENPF | 1          |
| hsa-miR-665 NM_016343   | CENPF | 1          |
| hsa-miR-297 NM_016343   | CENPF | 1          |
| hsa-miR-1233 NM_016343  | CENPF | 1          |
| hsa-miR-1291 NM_016343  | CENPF | 1          |
| hsa-miR-1306 NM_016343  | CENPF | 1          |
| hsa-miR-1539 NM_016343  | CENPF | 1          |
| hsa-miR-191C NM_016343  | CENPF | 1          |
| hsa-miR-466 NM_016343   | CENPF | 1          |
| hsa-miR-3171 NM_016343  | CENPF | 1          |
| hsa-miR-3192 NM_016343  | CENPF | 1          |
| hsa-miR-362C NM_016343  | CENPF | 1          |
| hsa-miR-3622 NM_016343  | CENPF | 1          |
| hsa-miR-3679 NM_016343  | CENPF | 1          |
| hsa-miR-3943 NM_016343  | CENPF | 1          |
| hsa-miR-4533 NM_016343  | CENPF | 1          |
| hsa-miR-4649 NM_016343  | CENPF | 1          |
| hsa-miR-4661 NM_016343  | CENPF | 1          |
| hsa-miR-4692 NM_016343  | CENPF | 1          |
| hsa-miR-4697 NM_016343  | CENPF | 1          |
| hsa-miR-4722 NM_016343  | CENPF | 1          |
| hsa-miR-2467 NM_016343  | CENPF | 1          |
| hsa-miR-4786 NM_016343  | CENPF | 1          |
| hsa-miR-501C NM_016343  | CENPF | 1          |
| hsa-miR-5587 NM_016343  | CENPF | 1          |
| hsa-miR-5681 NM_016343  | CENPF | 1          |
| hsa-miR-6125 NM_016343  | CENPF | 1          |
| hsa-miR-6729 NM_016343  | CENPF | 1          |
| hsa-miR-6735 NM_016343  | CENPF | 1          |
| hsa-miR-6761 NM_016343  | CENPF | 1          |
| hsa-miR-6811 NM_016343  | CENPF | 1          |
| hsa-miR-688C NM_016343  | CENPF | 1          |
| hsa-miR-1273 NM_016343  | CENPF | 1          |
| hsa-miR-7851 NM_016343  | CENPF | 1          |
| hsa-miR-8055 NM_016343  | CENPF | 1          |
| hsa-miR-8064 NM_016343  | CENPF | 1          |
| hsa-miR-8074 NM_016343  | CENPF | 1          |
| hsa-miR-8485 NM_016343  | CENPF | 1          |
| hsa-miR-114C NM_016343  | CENPF | 1          |
| hsa-miR-205-1 NM_017425 | SPA17 | 0.96153846 |
| hsa-miR-1231 NM_017425  | SPA17 | 0.96153846 |
| hsa-miR-1908 NM_017425  | SPA17 | 0.96153846 |
| hsa-miR-3129 NM_017425  | SPA17 | 0.96153846 |
| hsa-miR-3149 NM_017425  | SPA17 | 0.96153846 |
| hsa-miR-3173 NM_017425  | SPA17 | 0.96153846 |
| hsa-miR-3192 NM_017425  | SPA17 | 0.96153846 |
| hsa-miR-4326 NM_017425  | SPA17 | 0.96153846 |
| hsa-miR-4501 NM_017425  | SPA17 | 0.96153846 |
| hsa-miR-4515 NM_017425  | SPA17 | 0.96153846 |
| hsa-miR-4639 NM_017425  | SPA17 | 0.96153846 |
| hsa-miR-716C NM_017425  | SPA17 | 0.96153846 |

|                                |            |
|--------------------------------|------------|
| hsa-miR-8085 NM_017425 SPA17   | 0.96153846 |
| hsa-miR-1052 NM_017425 SPA17   | 0.96153846 |
| hsa-miR-760 NM_017425 SPA17    | 0.96923077 |
| hsa-miR-476S NM_017425 SPA17   | 0.96923077 |
| hsa-miR-520a NM_017425 SPA17   | 0.97435897 |
| hsa-miR-647 NM_017425 SPA17    | 0.97435897 |
| hsa-miR-316S NM_017425 SPA17   | 0.97435897 |
| hsa-miR-469C NM_017425 SPA17   | 0.97435897 |
| hsa-miR-4692 NM_017425 SPA17   | 0.97435897 |
| hsa-miR-8073 NM_017425 SPA17   | 0.97435897 |
| hsa-miR-8077 NM_017425 SPA17   | 0.97435897 |
| hsa-miR-1913 NM_017425 SPA17   | 0.97435897 |
| hsa-miR-6514 NM_017425 SPA17   | 0.97435897 |
| hsa-miR-6895 NM_017425 SPA17   | 0.97435897 |
| hsa-miR-766- NM_017425 SPA17   | 0.98076923 |
| hsa-miR-427C NM_017425 SPA17   | 0.98076923 |
| hsa-miR-6085 NM_017425 SPA17   | 0.98076923 |
| hsa-miR-6798 NM_017425 SPA17   | 0.98076923 |
| hsa-miR-6808 NM_017425 SPA17   | 0.98076923 |
| hsa-miR-8071 NM_017425 SPA17   | 0.98076923 |
| hsa-miR-8072 NM_017425 SPA17   | 0.98076923 |
| hsa-miR-8085 NM_017425 SPA17   | 0.98076923 |
| hsa-miR-16-1- NM_017425 SPA17  | 0.98461539 |
| hsa-miR-676S NM_017425 SPA17   | 0.98717949 |
| hsa-let-7a-2-3 NM_017425 SPA17 | 1          |
| hsa-let-7b-5p NM_017425 SPA17  | 1          |
| hsa-let-7e-5p NM_017425 SPA17  | 1          |
| hsa-let-7e-3p NM_017425 SPA17  | 1          |
| hsa-miR-15a- NM_017425 SPA17   | 1          |
| hsa-miR-17-3j NM_017425 SPA17  | 1          |
| hsa-miR-20a- NM_017425 SPA17   | 1          |
| hsa-miR-29a- NM_017425 SPA17   | 1          |
| hsa-miR-29b- NM_017425 SPA17   | 1          |
| hsa-miR-103a NM_017425 SPA17   | 1          |
| hsa-miR-105- NM_017425 SPA17   | 1          |
| hsa-miR-197- NM_017425 SPA17   | 1          |
| hsa-miR-198 NM_017425 SPA17    | 1          |
| hsa-miR-208a NM_017425 SPA17   | 1          |
| hsa-miR-208a NM_017425 SPA17   | 1          |
| hsa-miR-30c- NM_017425 SPA17   | 1          |
| hsa-miR-30c- NM_017425 SPA17   | 1          |
| hsa-miR-34a- NM_017425 SPA17   | 1          |
| hsa-miR-34a- NM_017425 SPA17   | 1          |
| hsa-miR-181a NM_017425 SPA17   | 1          |
| hsa-miR-187- NM_017425 SPA17   | 1          |
| hsa-miR-203a NM_017425 SPA17   | 1          |
| hsa-miR-205- NM_017425 SPA17   | 1          |
| hsa-miR-218- NM_017425 SPA17   | 1          |
| hsa-miR-219a NM_017425 SPA17   | 1          |
| hsa-miR-221- NM_017425 SPA17   | 1          |
| hsa-miR-224- NM_017425 SPA17   | 1          |
| hsa-let-7g-3p NM_017425 SPA17  | 1          |
| hsa-miR-23b- NM_017425 SPA17   | 1          |
| hsa-miR-30b- NM_017425 SPA17   | 1          |
| hsa-miR-124- NM_017425 SPA17   | 1          |
| hsa-miR-125t NM_017425 SPA17   | 1          |
| hsa-miR-135a NM_017425 SPA17   | 1          |
| hsa-miR-135a NM_017425 SPA17   | 1          |
| hsa-miR-135a NM_017425 SPA17   | 1          |
| hsa-miR-137- NM_017425 SPA17   | 1          |
| hsa-miR-138- NM_017425 SPA17   | 1          |
| hsa-miR-145- NM_017425 SPA17   | 1          |
| hsa-miR-145- NM_017425 SPA17   | 1          |
| hsa-miR-125t NM_017425 SPA17   | 1          |
| hsa-miR-125t NM_017425 SPA17   | 1          |
| hsa-miR-127- NM_017425 SPA17   | 1          |
| hsa-miR-149- NM_017425 SPA17   | 1          |
| hsa-miR-150- NM_017425 SPA17   | 1          |
| hsa-miR-150- NM_017425 SPA17   | 1          |
| hsa-miR-184 NM_017425 SPA17    | 1          |
| hsa-miR-184 NM_017425 SPA17    | 1          |
| hsa-miR-185- NM_017425 SPA17   | 1          |
| hsa-miR-186- NM_017425 SPA17   | 1          |
| hsa-miR-188- NM_017425 SPA17   | 1          |
| hsa-miR-193a NM_017425 SPA17   | 1          |
| hsa-miR-320a NM_017425 SPA17   | 1          |
| hsa-miR-320a NM_017425 SPA17   | 1          |
| hsa-miR-106t NM_017425 SPA17   | 1          |
| hsa-miR-34b- NM_017425 SPA17   | 1          |
| hsa-miR-299- NM_017425 SPA17   | 1          |
| hsa-miR-296- NM_017425 SPA17   | 1          |
| hsa-miR-296- NM_017425 SPA17   | 1          |
| hsa-miR-362- NM_017425 SPA17   | 1          |
| hsa-miR-365a NM_017425 SPA17   | 1          |
| hsa-miR-365t NM_017425 SPA17   | 1          |
| hsa-miR-302c NM_017425 SPA17   | 1          |
| hsa-miR-370- NM_017425 SPA17   | 1          |
| hsa-miR-375- NM_017425 SPA17   | 1          |
| hsa-miR-378a NM_017425 SPA17   | 1          |
| hsa-miR-378a NM_017425 SPA17   | 1          |
| hsa-miR-378a NM_017425 SPA17   | 1          |

|              |           |       |   |
|--------------|-----------|-------|---|
| hsa-miR-381- | NM_017425 | SPA17 | 1 |
| hsa-miR-330- | NM_017425 | SPA17 | 1 |
| hsa-miR-328- | NM_017425 | SPA17 | 1 |
| hsa-miR-328- | NM_017425 | SPA17 | 1 |
| hsa-miR-328- | NM_017425 | SPA17 | 1 |
| hsa-miR-328- | NM_017425 | SPA17 | 1 |
| hsa-miR-337- | NM_017425 | SPA17 | 1 |
| hsa-miR-148t | NM_017425 | SPA17 | 1 |
| hsa-miR-331- | NM_017425 | SPA17 | 1 |
| hsa-miR-331- | NM_017425 | SPA17 | 1 |
| hsa-miR-331- | NM_017425 | SPA17 | 1 |
| hsa-miR-133t | NM_017425 | SPA17 | 1 |
| hsa-miR-422a | NM_017425 | SPA17 | 1 |
| hsa-miR-423- | NM_017425 | SPA17 | 1 |
| hsa-miR-423- | NM_017425 | SPA17 | 1 |
| hsa-miR-20b- | NM_017425 | SPA17 | 1 |
| hsa-miR-449a | NM_017425 | SPA17 | 1 |
| hsa-miR-433- | NM_017425 | SPA17 | 1 |
| hsa-miR-329- | NM_017425 | SPA17 | 1 |
| hsa-miR-452- | NM_017425 | SPA17 | 1 |
| hsa-miR-412- | NM_017425 | SPA17 | 1 |
| hsa-miR-410- | NM_017425 | SPA17 | 1 |
| hsa-miR-483- | NM_017425 | SPA17 | 1 |
| hsa-miR-484  | NM_017425 | SPA17 | 1 |
| hsa-miR-486- | NM_017425 | SPA17 | 1 |
| hsa-miR-490- | NM_017425 | SPA17 | 1 |
| hsa-miR-146t | NM_017425 | SPA17 | 1 |
| hsa-miR-492  | NM_017425 | SPA17 | 1 |
| hsa-miR-432- | NM_017425 | SPA17 | 1 |
| hsa-miR-432- | NM_017425 | SPA17 | 1 |
| hsa-miR-496  | NM_017425 | SPA17 | 1 |
| hsa-miR-193t | NM_017425 | SPA17 | 1 |
| hsa-miR-193t | NM_017425 | SPA17 | 1 |
| hsa-miR-181d | NM_017425 | SPA17 | 1 |
| hsa-miR-512- | NM_017425 | SPA17 | 1 |
| hsa-miR-520f | NM_017425 | SPA17 | 1 |
| hsa-miR-520t | NM_017425 | SPA17 | 1 |
| hsa-miR-516t | NM_017425 | SPA17 | 1 |
| hsa-miR-519a | NM_017425 | SPA17 | 1 |
| hsa-miR-501- | NM_017425 | SPA17 | 1 |
| hsa-miR-450a | NM_017425 | SPA17 | 1 |
| hsa-miR-503- | NM_017425 | SPA17 | 1 |
| hsa-miR-505- | NM_017425 | SPA17 | 1 |
| hsa-miR-507  | NM_017425 | SPA17 | 1 |
| hsa-miR-510- | NM_017425 | SPA17 | 1 |
| hsa-miR-514a | NM_017425 | SPA17 | 1 |
| hsa-miR-514a | NM_017425 | SPA17 | 1 |
| hsa-miR-539- | NM_017425 | SPA17 | 1 |
| hsa-miR-487t | NM_017425 | SPA17 | 1 |
| hsa-miR-92b- | NM_017425 | SPA17 | 1 |
| hsa-miR-564  | NM_017425 | SPA17 | 1 |
| hsa-miR-551t | NM_017425 | SPA17 | 1 |
| hsa-miR-571  | NM_017425 | SPA17 | 1 |
| hsa-miR-572  | NM_017425 | SPA17 | 1 |
| hsa-miR-574- | NM_017425 | SPA17 | 1 |
| hsa-miR-575  | NM_017425 | SPA17 | 1 |
| hsa-miR-583  | NM_017425 | SPA17 | 1 |
| hsa-miR-584- | NM_017425 | SPA17 | 1 |
| hsa-miR-584- | NM_017425 | SPA17 | 1 |
| hsa-miR-589- | NM_017425 | SPA17 | 1 |
| hsa-miR-550a | NM_017425 | SPA17 | 1 |
| hsa-miR-598- | NM_017425 | SPA17 | 1 |
| hsa-miR-608  | NM_017425 | SPA17 | 1 |
| hsa-miR-610  | NM_017425 | SPA17 | 1 |
| hsa-miR-614  | NM_017425 | SPA17 | 1 |
| hsa-miR-615- | NM_017425 | SPA17 | 1 |
| hsa-miR-625- | NM_017425 | SPA17 | 1 |
| hsa-miR-638  | NM_017425 | SPA17 | 1 |
| hsa-miR-645  | NM_017425 | SPA17 | 1 |
| hsa-miR-656- | NM_017425 | SPA17 | 1 |
| hsa-miR-659- | NM_017425 | SPA17 | 1 |
| hsa-miR-660- | NM_017425 | SPA17 | 1 |
| hsa-miR-671- | NM_017425 | SPA17 | 1 |
| hsa-miR-668- | NM_017425 | SPA17 | 1 |
| hsa-miR-320t | NM_017425 | SPA17 | 1 |
| hsa-miR-320t | NM_017425 | SPA17 | 1 |
| hsa-miR-320t | NM_017425 | SPA17 | 1 |
| hsa-miR-1323 | NM_017425 | SPA17 | 1 |
| hsa-miR-1301 | NM_017425 | SPA17 | 1 |
| hsa-miR-1185 | NM_017425 | SPA17 | 1 |
| hsa-miR-1185 | NM_017425 | SPA17 | 1 |
| hsa-miR-449c | NM_017425 | SPA17 | 1 |
| hsa-miR-769- | NM_017425 | SPA17 | 1 |
| hsa-miR-769- | NM_017425 | SPA17 | 1 |
| hsa-miR-766- | NM_017425 | SPA17 | 1 |
| hsa-miR-762  | NM_017425 | SPA17 | 1 |
| hsa-miR-765  | NM_017425 | SPA17 | 1 |
| hsa-miR-298  | NM_017425 | SPA17 | 1 |
| hsa-miR-450t | NM_017425 | SPA17 | 1 |
| hsa-miR-892t | NM_017425 | SPA17 | 1 |
| hsa-miR-889- | NM_017425 | SPA17 | 1 |
| hsa-miR-744- | NM_017425 | SPA17 | 1 |
| hsa-miR-744- | NM_017425 | SPA17 | 1 |
| hsa-miR-922  | NM_017425 | SPA17 | 1 |



|                         |       |   |
|-------------------------|-------|---|
| hsa-miR-4256 NM_017425  | SPA17 | 1 |
| hsa-miR-4257 NM_017425  | SPA17 | 1 |
| hsa-miR-4327 NM_017425  | SPA17 | 1 |
| hsa-miR-4327 NM_017425  | SPA17 | 1 |
| hsa-miR-4270 NM_017425  | SPA17 | 1 |
| hsa-miR-4280 NM_017425  | SPA17 | 1 |
| hsa-miR-4283 NM_017425  | SPA17 | 1 |
| hsa-miR-3605 NM_017425  | SPA17 | 1 |
| hsa-miR-3614 NM_017425  | SPA17 | 1 |
| hsa-miR-3615 NM_017425  | SPA17 | 1 |
| hsa-miR-23c NM_017425   | SPA17 | 1 |
| hsa-miR-3620 NM_017425  | SPA17 | 1 |
| hsa-miR-3648 NM_017425  | SPA17 | 1 |
| hsa-miR-3651 NM_017425  | SPA17 | 1 |
| hsa-miR-3652 NM_017425  | SPA17 | 1 |
| hsa-miR-3661 NM_017425  | SPA17 | 1 |
| hsa-miR-3664 NM_017425  | SPA17 | 1 |
| hsa-miR-3677 NM_017425  | SPA17 | 1 |
| hsa-miR-3679 NM_017425  | SPA17 | 1 |
| hsa-miR-3685 NM_017425  | SPA17 | 1 |
| hsa-miR-3690 NM_017425  | SPA17 | 1 |
| hsa-miR-3692 NM_017425  | SPA17 | 1 |
| hsa-miR-3180 NM_017425  | SPA17 | 1 |
| hsa-miR-3907 NM_017425  | SPA17 | 1 |
| hsa-miR-3689 NM_017425  | SPA17 | 1 |
| hsa-miR-3916 NM_017425  | SPA17 | 1 |
| hsa-miR-3917 NM_017425  | SPA17 | 1 |
| hsa-miR-3917 NM_017425  | SPA17 | 1 |
| hsa-miR-3918 NM_017425  | SPA17 | 1 |
| hsa-miR-3922 NM_017425  | SPA17 | 1 |
| hsa-miR-676-1 NM_017425 | SPA17 | 1 |
| hsa-miR-3928 NM_017425  | SPA17 | 1 |
| hsa-miR-3934 NM_017425  | SPA17 | 1 |
| hsa-miR-3937 NM_017425  | SPA17 | 1 |
| hsa-miR-3937 NM_017425  | SPA17 | 1 |
| hsa-miR-3940 NM_017425  | SPA17 | 1 |
| hsa-miR-3945 NM_017425  | SPA17 | 1 |
| hsa-miR-550b NM_017425  | SPA17 | 1 |
| hsa-miR-550b NM_017425  | SPA17 | 1 |
| hsa-miR-550b NM_017425  | SPA17 | 1 |
| hsa-miR-1268 NM_017425  | SPA17 | 1 |
| hsa-miR-378g NM_017425  | SPA17 | 1 |
| hsa-miR-4428 NM_017425  | SPA17 | 1 |
| hsa-miR-4429 NM_017425  | SPA17 | 1 |
| hsa-miR-4430 NM_017425  | SPA17 | 1 |
| hsa-miR-4430 NM_017425  | SPA17 | 1 |
| hsa-miR-4433 NM_017425  | SPA17 | 1 |
| hsa-miR-4433 NM_017425  | SPA17 | 1 |
| hsa-miR-4435 NM_017425  | SPA17 | 1 |
| hsa-miR-4435 NM_017425  | SPA17 | 1 |
| hsa-miR-4441 NM_017425  | SPA17 | 1 |
| hsa-miR-4443 NM_017425  | SPA17 | 1 |
| hsa-miR-4447 NM_017425  | SPA17 | 1 |
| hsa-miR-4449 NM_017425  | SPA17 | 1 |
| hsa-miR-4450 NM_017425  | SPA17 | 1 |
| hsa-miR-4457 NM_017425  | SPA17 | 1 |
| hsa-miR-4463 NM_017425  | SPA17 | 1 |
| hsa-miR-4463 NM_017425  | SPA17 | 1 |
| hsa-miR-4467 NM_017425  | SPA17 | 1 |
| hsa-miR-4474 NM_017425  | SPA17 | 1 |
| hsa-miR-4474 NM_017425  | SPA17 | 1 |
| hsa-miR-4478 NM_017425  | SPA17 | 1 |
| hsa-miR-3689 NM_017425  | SPA17 | 1 |
| hsa-miR-3689 NM_017425  | SPA17 | 1 |
| hsa-miR-4483 NM_017425  | SPA17 | 1 |
| hsa-miR-4486 NM_017425  | SPA17 | 1 |
| hsa-miR-4487 NM_017425  | SPA17 | 1 |
| hsa-miR-4498 NM_017425  | SPA17 | 1 |
| hsa-miR-4505 NM_017425  | SPA17 | 1 |
| hsa-miR-4505 NM_017425  | SPA17 | 1 |
| hsa-miR-2392 NM_017425  | SPA17 | 1 |
| hsa-miR-2392 NM_017425  | SPA17 | 1 |
| hsa-miR-4507 NM_017425  | SPA17 | 1 |
| hsa-miR-4508 NM_017425  | SPA17 | 1 |
| hsa-miR-4513 NM_017425  | SPA17 | 1 |
| hsa-miR-4513 NM_017425  | SPA17 | 1 |
| hsa-miR-4514 NM_017425  | SPA17 | 1 |
| hsa-miR-4516 NM_017425  | SPA17 | 1 |
| hsa-miR-4516 NM_017425  | SPA17 | 1 |
| hsa-miR-4520 NM_017425  | SPA17 | 1 |
| hsa-miR-4525 NM_017425  | SPA17 | 1 |
| hsa-miR-4526 NM_017425  | SPA17 | 1 |
| hsa-miR-4533 NM_017425  | SPA17 | 1 |
| hsa-miR-4534 NM_017425  | SPA17 | 1 |
| hsa-miR-4534 NM_017425  | SPA17 | 1 |
| hsa-miR-1587 NM_017425  | SPA17 | 1 |
| hsa-miR-4537 NM_017425  | SPA17 | 1 |
| hsa-miR-4538 NM_017425  | SPA17 | 1 |
| hsa-miR-3960 NM_017425  | SPA17 | 1 |
| hsa-miR-3975 NM_017425  | SPA17 | 1 |
| hsa-miR-4633 NM_017425  | SPA17 | 1 |
| hsa-miR-4633 NM_017425  | SPA17 | 1 |
| hsa-miR-4638 NM_017425  | SPA17 | 1 |
| hsa-miR-4638 NM_017425  | SPA17 | 1 |











|              |           |       |   |
|--------------|-----------|-------|---|
| hsa-miR-217- | NM_175940 | DUOX1 | 1 |
| hsa-miR-30b- | NM_175940 | DUOX1 | 1 |
| hsa-miR-137- | NM_175940 | DUOX1 | 1 |
| hsa-miR-142- | NM_175940 | DUOX1 | 1 |
| hsa-miR-299- | NM_175940 | DUOX1 | 1 |
| hsa-miR-363- | NM_175940 | DUOX1 | 1 |
| hsa-miR-375- | NM_175940 | DUOX1 | 1 |
| hsa-miR-379- | NM_175940 | DUOX1 | 1 |
| hsa-miR-342- | NM_175940 | DUOX1 | 1 |
| hsa-miR-338- | NM_175940 | DUOX1 | 1 |
| hsa-miR-491- | NM_175940 | DUOX1 | 1 |
| hsa-miR-193b | NM_175940 | DUOX1 | 1 |
| hsa-miR-504- | NM_175940 | DUOX1 | 1 |
| hsa-miR-584- | NM_175940 | DUOX1 | 1 |
| hsa-miR-616- | NM_175940 | DUOX1 | 1 |
| hsa-miR-632  | NM_175940 | DUOX1 | 1 |
| hsa-miR-1185 | NM_175940 | DUOX1 | 1 |
| hsa-miR-1185 | NM_175940 | DUOX1 | 1 |
| hsa-miR-670- | NM_175940 | DUOX1 | 1 |
| hsa-miR-675- | NM_175940 | DUOX1 | 1 |
| hsa-miR-892b | NM_175940 | DUOX1 | 1 |
| hsa-miR-885- | NM_175940 | DUOX1 | 1 |
| hsa-miR-665  | NM_175940 | DUOX1 | 1 |
| hsa-miR-129c | NM_175940 | DUOX1 | 1 |
| hsa-miR-1246 | NM_175940 | DUOX1 | 1 |
| hsa-miR-1249 | NM_175940 | DUOX1 | 1 |
| hsa-miR-1249 | NM_175940 | DUOX1 | 1 |
| hsa-miR-1256 | NM_175940 | DUOX1 | 1 |
| hsa-miR-664a | NM_175940 | DUOX1 | 1 |
| hsa-miR-1825 | NM_175940 | DUOX1 | 1 |
| hsa-miR-1827 | NM_175940 | DUOX1 | 1 |
| hsa-miR-1976 | NM_175940 | DUOX1 | 1 |
| hsa-miR-3116 | NM_175940 | DUOX1 | 1 |
| hsa-miR-466  | NM_175940 | DUOX1 | 1 |
| hsa-miR-315c | NM_175940 | DUOX1 | 1 |
| hsa-miR-3154 | NM_175940 | DUOX1 | 1 |
| hsa-miR-3154 | NM_175940 | DUOX1 | 1 |
| hsa-miR-3154 | NM_175940 | DUOX1 | 1 |
| hsa-miR-3156 | NM_175940 | DUOX1 | 1 |
| hsa-miR-3162 | NM_175940 | DUOX1 | 1 |
| hsa-miR-126c | NM_175940 | DUOX1 | 1 |
| hsa-miR-323b | NM_175940 | DUOX1 | 1 |
| hsa-miR-319c | NM_175940 | DUOX1 | 1 |
| hsa-miR-3191 | NM_175940 | DUOX1 | 1 |
| hsa-miR-3202 | NM_175940 | DUOX1 | 1 |
| hsa-miR-4294 | NM_175940 | DUOX1 | 1 |
| hsa-miR-4319 | NM_175940 | DUOX1 | 1 |
| hsa-miR-4324 | NM_175940 | DUOX1 | 1 |
| hsa-miR-4286 | NM_175940 | DUOX1 | 1 |
| hsa-miR-433c | NM_175940 | DUOX1 | 1 |
| hsa-miR-3622 | NM_175940 | DUOX1 | 1 |
| hsa-miR-3654 | NM_175940 | DUOX1 | 1 |
| hsa-miR-318c | NM_175940 | DUOX1 | 1 |
| hsa-miR-3911 | NM_175940 | DUOX1 | 1 |
| hsa-miR-3912 | NM_175940 | DUOX1 | 1 |
| hsa-miR-4429 | NM_175940 | DUOX1 | 1 |
| hsa-miR-4433 | NM_175940 | DUOX1 | 1 |
| hsa-miR-4435 | NM_175940 | DUOX1 | 1 |
| hsa-miR-4441 | NM_175940 | DUOX1 | 1 |
| hsa-miR-4458 | NM_175940 | DUOX1 | 1 |
| hsa-miR-4491 | NM_175940 | DUOX1 | 1 |
| hsa-miR-2392 | NM_175940 | DUOX1 | 1 |
| hsa-miR-4513 | NM_175940 | DUOX1 | 1 |
| hsa-miR-4646 | NM_175940 | DUOX1 | 1 |
| hsa-miR-4664 | NM_175940 | DUOX1 | 1 |
| hsa-miR-4676 | NM_175940 | DUOX1 | 1 |
| hsa-miR-469c | NM_175940 | DUOX1 | 1 |
| hsa-miR-4708 | NM_175940 | DUOX1 | 1 |
| hsa-miR-4713 | NM_175940 | DUOX1 | 1 |
| hsa-miR-3529 | NM_175940 | DUOX1 | 1 |
| hsa-miR-4717 | NM_175940 | DUOX1 | 1 |
| hsa-miR-4728 | NM_175940 | DUOX1 | 1 |
| hsa-miR-4731 | NM_175940 | DUOX1 | 1 |
| hsa-miR-371b | NM_175940 | DUOX1 | 1 |
| hsa-miR-4763 | NM_175940 | DUOX1 | 1 |
| hsa-miR-4789 | NM_175940 | DUOX1 | 1 |
| hsa-miR-5002 | NM_175940 | DUOX1 | 1 |
| hsa-miR-5011 | NM_175940 | DUOX1 | 1 |
| hsa-miR-5189 | NM_175940 | DUOX1 | 1 |
| hsa-miR-664b | NM_175940 | DUOX1 | 1 |
| hsa-miR-5584 | NM_175940 | DUOX1 | 1 |
| hsa-miR-5681 | NM_175940 | DUOX1 | 1 |
| hsa-miR-5702 | NM_175940 | DUOX1 | 1 |
| hsa-miR-5703 | NM_175940 | DUOX1 | 1 |
| hsa-miR-1199 | NM_175940 | DUOX1 | 1 |
| hsa-miR-6132 | NM_175940 | DUOX1 | 1 |
| hsa-miR-6133 | NM_175940 | DUOX1 | 1 |
| hsa-miR-6505 | NM_175940 | DUOX1 | 1 |
| hsa-miR-6509 | NM_175940 | DUOX1 | 1 |
| hsa-miR-651c | NM_175940 | DUOX1 | 1 |
| hsa-miR-651c | NM_175940 | DUOX1 | 1 |
| hsa-miR-6512 | NM_175940 | DUOX1 | 1 |
| hsa-miR-6511 | NM_175940 | DUOX1 | 1 |
| hsa-miR-6722 | NM_175940 | DUOX1 | 1 |

|                          |       |   |
|--------------------------|-------|---|
| hsa-miR-6731 NM_175940   | DUOX1 | 1 |
| hsa-miR-6738 NM_175940   | DUOX1 | 1 |
| hsa-miR-6740 NM_175940   | DUOX1 | 1 |
| hsa-miR-6742 NM_175940   | DUOX1 | 1 |
| hsa-miR-6748 NM_175940   | DUOX1 | 1 |
| hsa-miR-6753 NM_175940   | DUOX1 | 1 |
| hsa-miR-6761 NM_175940   | DUOX1 | 1 |
| hsa-miR-6763 NM_175940   | DUOX1 | 1 |
| hsa-miR-6766 NM_175940   | DUOX1 | 1 |
| hsa-miR-6769 NM_175940   | DUOX1 | 1 |
| hsa-miR-6772 NM_175940   | DUOX1 | 1 |
| hsa-miR-6774 NM_175940   | DUOX1 | 1 |
| hsa-miR-6780 NM_175940   | DUOX1 | 1 |
| hsa-miR-6784 NM_175940   | DUOX1 | 1 |
| hsa-miR-6785 NM_175940   | DUOX1 | 1 |
| hsa-miR-6788 NM_175940   | DUOX1 | 1 |
| hsa-miR-6794 NM_175940   | DUOX1 | 1 |
| hsa-miR-6794 NM_175940   | DUOX1 | 1 |
| hsa-miR-6798 NM_175940   | DUOX1 | 1 |
| hsa-miR-6802 NM_175940   | DUOX1 | 1 |
| hsa-miR-6821 NM_175940   | DUOX1 | 1 |
| hsa-miR-6824 NM_175940   | DUOX1 | 1 |
| hsa-miR-6825 NM_175940   | DUOX1 | 1 |
| hsa-miR-6833 NM_175940   | DUOX1 | 1 |
| hsa-miR-6834 NM_175940   | DUOX1 | 1 |
| hsa-miR-6780 NM_175940   | DUOX1 | 1 |
| hsa-miR-6848 NM_175940   | DUOX1 | 1 |
| hsa-miR-6769 NM_175940   | DUOX1 | 1 |
| hsa-miR-6870 NM_175940   | DUOX1 | 1 |
| hsa-miR-6874 NM_175940   | DUOX1 | 1 |
| hsa-miR-6876 NM_175940   | DUOX1 | 1 |
| hsa-miR-6886 NM_175940   | DUOX1 | 1 |
| hsa-miR-6886 NM_175940   | DUOX1 | 1 |
| hsa-miR-7110 NM_175940   | DUOX1 | 1 |
| hsa-miR-7110 NM_175940   | DUOX1 | 1 |
| hsa-miR-4433 NM_175940   | DUOX1 | 1 |
| hsa-miR-4433 NM_175940   | DUOX1 | 1 |
| hsa-miR-8060 NM_175940   | DUOX1 | 1 |
| hsa-miR-8070 NM_175940   | DUOX1 | 1 |
| hsa-miR-8077 NM_175940   | DUOX1 | 1 |
| hsa-miR-9718 NM_175940   | DUOX1 | 1 |
| hsa-miR-9986 NM_175940   | DUOX1 | 1 |
| hsa-miR-1039 NM_175940   | DUOX1 | 1 |
| hsa-miR-1040 NM_175940   | DUOX1 | 1 |
| hsa-miR-1040 NM_175940   | DUOX1 | 1 |
| hsa-miR-1052 NM_175940   | DUOX1 | 1 |
| hsa-miR-1052 NM_175940   | DUOX1 | 1 |
| hsa-miR-1118 NM_175940   | DUOX1 | 1 |
| hsa-miR-1118 NM_175940   | DUOX1 | 1 |
| hsa-miR-1211 NM_175940   | DUOX1 | 1 |
| hsa-miR-1212 NM_175940   | DUOX1 | 1 |
| hsa-let-7e-5p XM_0115216 | DUOX1 | 1 |
| hsa-miR-198 XM_0115216   | DUOX1 | 1 |
| hsa-miR-182-XM_0115216   | DUOX1 | 1 |
| hsa-miR-215-XM_0115216   | DUOX1 | 1 |
| hsa-miR-216a XM_0115216  | DUOX1 | 1 |
| hsa-miR-217-XM_0115216   | DUOX1 | 1 |
| hsa-miR-137-XM_0115216   | DUOX1 | 1 |
| hsa-miR-142-XM_0115216   | DUOX1 | 1 |
| hsa-miR-136-XM_0115216   | DUOX1 | 1 |
| hsa-miR-188-XM_0115216   | DUOX1 | 1 |
| hsa-miR-299-XM_0115216   | DUOX1 | 1 |
| hsa-miR-363-XM_0115216   | DUOX1 | 1 |
| hsa-miR-375-XM_0115216   | DUOX1 | 1 |
| hsa-miR-379-XM_0115216   | DUOX1 | 1 |
| hsa-miR-328-XM_0115216   | DUOX1 | 1 |
| hsa-miR-342-XM_0115216   | DUOX1 | 1 |
| hsa-miR-338-XM_0115216   | DUOX1 | 1 |
| hsa-miR-486-XM_0115216   | DUOX1 | 1 |
| hsa-miR-491-XM_0115216   | DUOX1 | 1 |
| hsa-miR-202-XM_0115216   | DUOX1 | 1 |
| hsa-miR-193t XM_0115216  | DUOX1 | 1 |
| hsa-miR-516t XM_0115216  | DUOX1 | 1 |
| hsa-miR-505-XM_0115216   | DUOX1 | 1 |
| hsa-miR-455-XM_0115216   | DUOX1 | 1 |
| hsa-miR-555 XM_0115216   | DUOX1 | 1 |
| hsa-miR-574-XM_0115216   | DUOX1 | 1 |
| hsa-miR-584-XM_0115216   | DUOX1 | 1 |
| hsa-miR-616-XM_0115216   | DUOX1 | 1 |
| hsa-miR-632 XM_0115216   | DUOX1 | 1 |
| hsa-miR-549a XM_0115216  | DUOX1 | 1 |
| hsa-miR-767-XM_0115216   | DUOX1 | 1 |
| hsa-miR-449c XM_0115216  | DUOX1 | 1 |
| hsa-miR-769-XM_0115216   | DUOX1 | 1 |
| hsa-miR-670-XM_0115216   | DUOX1 | 1 |
| hsa-miR-675-XM_0115216   | DUOX1 | 1 |
| hsa-miR-675-XM_0115216   | DUOX1 | 1 |
| hsa-miR-885-XM_0115216   | DUOX1 | 1 |
| hsa-miR-1182 XM_0115216  | DUOX1 | 1 |
| hsa-miR-1229 XM_0115216  | DUOX1 | 1 |
| hsa-miR-1202 XM_0115216  | DUOX1 | 1 |
| hsa-miR-1208 XM_0115216  | DUOX1 | 1 |
| hsa-miR-1290 XM_0115216  | DUOX1 | 1 |
| hsa-miR-548l XM_0115216  | DUOX1 | 1 |

|                               |   |
|-------------------------------|---|
| hsa-miR-1246 XM_0115216 DUOX1 | 1 |
| hsa-miR-1245 XM_0115216 DUOX1 | 1 |
| hsa-miR-1245 XM_0115216 DUOX1 | 1 |
| hsa-miR-1256 XM_0115216 DUOX1 | 1 |
| hsa-miR-1275 XM_0115216 DUOX1 | 1 |
| hsa-miR-1825 XM_0115216 DUOX1 | 1 |
| hsa-miR-1827 XM_0115216 DUOX1 | 1 |
| hsa-miR-1913 XM_0115216 DUOX1 | 1 |
| hsa-miR-1976 XM_0115216 DUOX1 | 1 |
| hsa-miR-2861 XM_0115216 DUOX1 | 1 |
| hsa-miR-3150 XM_0115216 DUOX1 | 1 |
| hsa-miR-3154 XM_0115216 DUOX1 | 1 |
| hsa-miR-3154 XM_0115216 DUOX1 | 1 |
| hsa-miR-3155 XM_0115216 DUOX1 | 1 |
| hsa-miR-3156 XM_0115216 DUOX1 | 1 |
| hsa-miR-3156 XM_0115216 DUOX1 | 1 |
| hsa-miR-3162 XM_0115216 DUOX1 | 1 |
| hsa-miR-317C XM_0115216 DUOX1 | 1 |
| hsa-miR-3190 XM_0115216 DUOX1 | 1 |
| hsa-miR-3202 XM_0115216 DUOX1 | 1 |
| hsa-miR-3202 XM_0115216 DUOX1 | 1 |
| hsa-miR-4294 XM_0115216 DUOX1 | 1 |
| hsa-miR-4315 XM_0115216 DUOX1 | 1 |
| hsa-miR-4324 XM_0115216 DUOX1 | 1 |
| hsa-miR-4252 XM_0115216 DUOX1 | 1 |
| hsa-miR-4327 XM_0115216 DUOX1 | 1 |
| hsa-miR-4271 XM_0115216 DUOX1 | 1 |
| hsa-miR-4278 XM_0115216 DUOX1 | 1 |
| hsa-miR-4286 XM_0115216 DUOX1 | 1 |
| hsa-miR-4330 XM_0115216 DUOX1 | 1 |
| hsa-miR-3615 XM_0115216 DUOX1 | 1 |
| hsa-miR-3622 XM_0115216 DUOX1 | 1 |
| hsa-miR-3654 XM_0115216 DUOX1 | 1 |
| hsa-miR-3677 XM_0115216 DUOX1 | 1 |
| hsa-miR-3921 XM_0115216 DUOX1 | 1 |
| hsa-miR-3934 XM_0115216 DUOX1 | 1 |
| hsa-miR-4421 XM_0115216 DUOX1 | 1 |
| hsa-miR-378g XM_0115216 DUOX1 | 1 |
| hsa-miR-4425 XM_0115216 DUOX1 | 1 |
| hsa-miR-4433 XM_0115216 DUOX1 | 1 |
| hsa-miR-4435 XM_0115216 DUOX1 | 1 |
| hsa-miR-4441 XM_0115216 DUOX1 | 1 |
| hsa-miR-4443 XM_0115216 DUOX1 | 1 |
| hsa-miR-4446 XM_0115216 DUOX1 | 1 |
| hsa-miR-4450 XM_0115216 DUOX1 | 1 |
| hsa-miR-4458 XM_0115216 DUOX1 | 1 |
| hsa-miR-4472 XM_0115216 DUOX1 | 1 |
| hsa-miR-4491 XM_0115216 DUOX1 | 1 |
| hsa-miR-2392 XM_0115216 DUOX1 | 1 |
| hsa-miR-4513 XM_0115216 DUOX1 | 1 |
| hsa-miR-4516 XM_0115216 DUOX1 | 1 |
| hsa-miR-4519 XM_0115216 DUOX1 | 1 |
| hsa-miR-1587 XM_0115216 DUOX1 | 1 |
| hsa-miR-3978 XM_0115216 DUOX1 | 1 |
| hsa-miR-4641 XM_0115216 DUOX1 | 1 |
| hsa-miR-4645 XM_0115216 DUOX1 | 1 |
| hsa-miR-4667 XM_0115216 DUOX1 | 1 |
| hsa-miR-4676 XM_0115216 DUOX1 | 1 |
| hsa-miR-4684 XM_0115216 DUOX1 | 1 |
| hsa-miR-4692 XM_0115216 DUOX1 | 1 |
| hsa-miR-4695 XM_0115216 DUOX1 | 1 |
| hsa-miR-4701 XM_0115216 DUOX1 | 1 |
| hsa-miR-4708 XM_0115216 DUOX1 | 1 |
| hsa-miR-4713 XM_0115216 DUOX1 | 1 |
| hsa-miR-3525 XM_0115216 DUOX1 | 1 |
| hsa-miR-4717 XM_0115216 DUOX1 | 1 |
| hsa-miR-4722 XM_0115216 DUOX1 | 1 |
| hsa-miR-4725 XM_0115216 DUOX1 | 1 |
| hsa-miR-4731 XM_0115216 DUOX1 | 1 |
| hsa-miR-4731 XM_0115216 DUOX1 | 1 |
| hsa-miR-4740 XM_0115216 DUOX1 | 1 |
| hsa-miR-4745 XM_0115216 DUOX1 | 1 |
| hsa-miR-371t XM_0115216 DUOX1 | 1 |
| hsa-miR-5002 XM_0115216 DUOX1 | 1 |
| hsa-miR-5004 XM_0115216 DUOX1 | 1 |
| hsa-miR-5011 XM_0115216 DUOX1 | 1 |
| hsa-miR-5093 XM_0115216 DUOX1 | 1 |
| hsa-miR-664t XM_0115216 DUOX1 | 1 |
| hsa-miR-664t XM_0115216 DUOX1 | 1 |
| hsa-miR-664t XM_0115216 DUOX1 | 1 |
| hsa-miR-5584 XM_0115216 DUOX1 | 1 |
| hsa-miR-5681 XM_0115216 DUOX1 | 1 |
| hsa-miR-5702 XM_0115216 DUOX1 | 1 |
| hsa-miR-5703 XM_0115216 DUOX1 | 1 |
| hsa-miR-1195 XM_0115216 DUOX1 | 1 |
| hsa-miR-6085 XM_0115216 DUOX1 | 1 |
| hsa-miR-6086 XM_0115216 DUOX1 | 1 |
| hsa-miR-6124 XM_0115216 DUOX1 | 1 |
| hsa-miR-6132 XM_0115216 DUOX1 | 1 |
| hsa-miR-6133 XM_0115216 DUOX1 | 1 |
| hsa-miR-6505 XM_0115216 DUOX1 | 1 |
| hsa-miR-6505 XM_0115216 DUOX1 | 1 |
| hsa-miR-6510 XM_0115216 DUOX1 | 1 |
| hsa-miR-6510 XM_0115216 DUOX1 | 1 |

|                               |   |
|-------------------------------|---|
| hsa-miR-6511 XM_0115216 DUOX1 | 1 |
| hsa-miR-6512 XM_0115216 DUOX1 | 1 |
| hsa-miR-6722 XM_0115216 DUOX1 | 1 |
| hsa-miR-6722 XM_0115216 DUOX1 | 1 |
| hsa-miR-6728 XM_0115216 DUOX1 | 1 |
| hsa-miR-6728 XM_0115216 DUOX1 | 1 |
| hsa-miR-6725 XM_0115216 DUOX1 | 1 |
| hsa-miR-6731 XM_0115216 DUOX1 | 1 |
| hsa-miR-6732 XM_0115216 DUOX1 | 1 |
| hsa-miR-6738 XM_0115216 DUOX1 | 1 |
| hsa-miR-6740 XM_0115216 DUOX1 | 1 |
| hsa-miR-6741 XM_0115216 DUOX1 | 1 |
| hsa-miR-6742 XM_0115216 DUOX1 | 1 |
| hsa-miR-6748 XM_0115216 DUOX1 | 1 |
| hsa-miR-6761 XM_0115216 DUOX1 | 1 |
| hsa-miR-6762 XM_0115216 DUOX1 | 1 |
| hsa-miR-6763 XM_0115216 DUOX1 | 1 |
| hsa-miR-6763 XM_0115216 DUOX1 | 1 |
| hsa-miR-6766 XM_0115216 DUOX1 | 1 |
| hsa-miR-6765 XM_0115216 DUOX1 | 1 |
| hsa-miR-6772 XM_0115216 DUOX1 | 1 |
| hsa-miR-6773 XM_0115216 DUOX1 | 1 |
| hsa-miR-6774 XM_0115216 DUOX1 | 1 |
| hsa-miR-6780 XM_0115216 DUOX1 | 1 |
| hsa-miR-6788 XM_0115216 DUOX1 | 1 |
| hsa-miR-6793 XM_0115216 DUOX1 | 1 |
| hsa-miR-6794 XM_0115216 DUOX1 | 1 |
| hsa-miR-6794 XM_0115216 DUOX1 | 1 |
| hsa-miR-6796 XM_0115216 DUOX1 | 1 |
| hsa-miR-6797 XM_0115216 DUOX1 | 1 |
| hsa-miR-6795 XM_0115216 DUOX1 | 1 |
| hsa-miR-6801 XM_0115216 DUOX1 | 1 |
| hsa-miR-6802 XM_0115216 DUOX1 | 1 |
| hsa-miR-6803 XM_0115216 DUOX1 | 1 |
| hsa-miR-6805 XM_0115216 DUOX1 | 1 |
| hsa-miR-6815 XM_0115216 DUOX1 | 1 |
| hsa-miR-6821 XM_0115216 DUOX1 | 1 |
| hsa-miR-6825 XM_0115216 DUOX1 | 1 |
| hsa-miR-6826 XM_0115216 DUOX1 | 1 |
| hsa-miR-6833 XM_0115216 DUOX1 | 1 |
| hsa-miR-6834 XM_0115216 DUOX1 | 1 |
| hsa-miR-678C XM_0115216 DUOX1 | 1 |
| hsa-miR-6848 XM_0115216 DUOX1 | 1 |
| hsa-miR-6856 XM_0115216 DUOX1 | 1 |
| hsa-miR-6861 XM_0115216 DUOX1 | 1 |
| hsa-miR-6861 XM_0115216 DUOX1 | 1 |
| hsa-miR-6870 XM_0115216 DUOX1 | 1 |
| hsa-miR-6876 XM_0115216 DUOX1 | 1 |
| hsa-miR-6877 XM_0115216 DUOX1 | 1 |
| hsa-miR-6882 XM_0115216 DUOX1 | 1 |
| hsa-miR-6886 XM_0115216 DUOX1 | 1 |
| hsa-miR-6889 XM_0115216 DUOX1 | 1 |
| hsa-miR-6890 XM_0115216 DUOX1 | 1 |
| hsa-miR-6891 XM_0115216 DUOX1 | 1 |
| hsa-miR-6891 XM_0115216 DUOX1 | 1 |
| hsa-miR-711C XM_0115216 DUOX1 | 1 |
| hsa-miR-711C XM_0115216 DUOX1 | 1 |
| hsa-miR-7155 XM_0115216 DUOX1 | 1 |
| hsa-miR-4433 XM_0115216 DUOX1 | 1 |
| hsa-miR-4433 XM_0115216 DUOX1 | 1 |
| hsa-miR-806C XM_0115216 DUOX1 | 1 |
| hsa-miR-8077 XM_0115216 DUOX1 | 1 |
| hsa-miR-9718 XM_0115216 DUOX1 | 1 |
| hsa-miR-9986 XM_0115216 DUOX1 | 1 |
| hsa-miR-104C XM_0115216 DUOX1 | 1 |
| hsa-miR-1052 XM_0115216 DUOX1 | 1 |
| hsa-miR-1118 XM_0115216 DUOX1 | 1 |
| hsa-miR-1118 XM_0115216 DUOX1 | 1 |
| hsa-miR-3085 XM_0115216 DUOX1 | 1 |
| hsa-miR-1211 XM_0115216 DUOX1 | 1 |
| hsa-let-7e-5p NM_017434 DUOX1 | 1 |
| hsa-miR-33a- NM_017434 DUOX1  | 1 |
| hsa-miR-198 NM_017434 DUOX1   | 1 |
| hsa-miR-182- NM_017434 DUOX1  | 1 |
| hsa-miR-215- NM_017434 DUOX1  | 1 |
| hsa-miR-217- NM_017434 DUOX1  | 1 |
| hsa-miR-30b- NM_017434 DUOX1  | 1 |
| hsa-miR-137- NM_017434 DUOX1  | 1 |
| hsa-miR-142- NM_017434 DUOX1  | 1 |
| hsa-miR-299- NM_017434 DUOX1  | 1 |
| hsa-miR-363- NM_017434 DUOX1  | 1 |
| hsa-miR-375- NM_017434 DUOX1  | 1 |
| hsa-miR-379- NM_017434 DUOX1  | 1 |
| hsa-miR-342- NM_017434 DUOX1  | 1 |
| hsa-miR-338- NM_017434 DUOX1  | 1 |
| hsa-miR-491- NM_017434 DUOX1  | 1 |
| hsa-miR-193b NM_017434 DUOX1  | 1 |
| hsa-miR-504- NM_017434 DUOX1  | 1 |
| hsa-miR-584- NM_017434 DUOX1  | 1 |
| hsa-miR-616- NM_017434 DUOX1  | 1 |
| hsa-miR-632 NM_017434 DUOX1   | 1 |
| hsa-miR-1185 NM_017434 DUOX1  | 1 |
| hsa-miR-1185 NM_017434 DUOX1  | 1 |
| hsa-miR-670- NM_017434 DUOX1  | 1 |

|              |           |       |   |
|--------------|-----------|-------|---|
| hsa-miR-675- | NM_017434 | DUOX1 | 1 |
| hsa-miR-892b | NM_017434 | DUOX1 | 1 |
| hsa-miR-885- | NM_017434 | DUOX1 | 1 |
| hsa-miR-665  | NM_017434 | DUOX1 | 1 |
| hsa-miR-129C | NM_017434 | DUOX1 | 1 |
| hsa-miR-1246 | NM_017434 | DUOX1 | 1 |
| hsa-miR-1245 | NM_017434 | DUOX1 | 1 |
| hsa-miR-1245 | NM_017434 | DUOX1 | 1 |
| hsa-miR-1256 | NM_017434 | DUOX1 | 1 |
| hsa-miR-664a | NM_017434 | DUOX1 | 1 |
| hsa-miR-1825 | NM_017434 | DUOX1 | 1 |
| hsa-miR-1827 | NM_017434 | DUOX1 | 1 |
| hsa-miR-1976 | NM_017434 | DUOX1 | 1 |
| hsa-miR-3116 | NM_017434 | DUOX1 | 1 |
| hsa-miR-466  | NM_017434 | DUOX1 | 1 |
| hsa-miR-315C | NM_017434 | DUOX1 | 1 |
| hsa-miR-3154 | NM_017434 | DUOX1 | 1 |
| hsa-miR-3154 | NM_017434 | DUOX1 | 1 |
| hsa-miR-3154 | NM_017434 | DUOX1 | 1 |
| hsa-miR-3156 | NM_017434 | DUOX1 | 1 |
| hsa-miR-3162 | NM_017434 | DUOX1 | 1 |
| hsa-miR-126C | NM_017434 | DUOX1 | 1 |
| hsa-miR-323b | NM_017434 | DUOX1 | 1 |
| hsa-miR-319C | NM_017434 | DUOX1 | 1 |
| hsa-miR-3191 | NM_017434 | DUOX1 | 1 |
| hsa-miR-3202 | NM_017434 | DUOX1 | 1 |
| hsa-miR-4294 | NM_017434 | DUOX1 | 1 |
| hsa-miR-4315 | NM_017434 | DUOX1 | 1 |
| hsa-miR-4324 | NM_017434 | DUOX1 | 1 |
| hsa-miR-4286 | NM_017434 | DUOX1 | 1 |
| hsa-miR-433C | NM_017434 | DUOX1 | 1 |
| hsa-miR-3622 | NM_017434 | DUOX1 | 1 |
| hsa-miR-3654 | NM_017434 | DUOX1 | 1 |
| hsa-miR-318C | NM_017434 | DUOX1 | 1 |
| hsa-miR-3911 | NM_017434 | DUOX1 | 1 |
| hsa-miR-3912 | NM_017434 | DUOX1 | 1 |
| hsa-miR-3945 | NM_017434 | DUOX1 | 1 |
| hsa-miR-4425 | NM_017434 | DUOX1 | 1 |
| hsa-miR-4433 | NM_017434 | DUOX1 | 1 |
| hsa-miR-4435 | NM_017434 | DUOX1 | 1 |
| hsa-miR-4441 | NM_017434 | DUOX1 | 1 |
| hsa-miR-4458 | NM_017434 | DUOX1 | 1 |
| hsa-miR-4491 | NM_017434 | DUOX1 | 1 |
| hsa-miR-2392 | NM_017434 | DUOX1 | 1 |
| hsa-miR-4513 | NM_017434 | DUOX1 | 1 |
| hsa-miR-4646 | NM_017434 | DUOX1 | 1 |
| hsa-miR-4664 | NM_017434 | DUOX1 | 1 |
| hsa-miR-4676 | NM_017434 | DUOX1 | 1 |
| hsa-miR-469C | NM_017434 | DUOX1 | 1 |
| hsa-miR-4708 | NM_017434 | DUOX1 | 1 |
| hsa-miR-4713 | NM_017434 | DUOX1 | 1 |
| hsa-miR-3525 | NM_017434 | DUOX1 | 1 |
| hsa-miR-4717 | NM_017434 | DUOX1 | 1 |
| hsa-miR-4728 | NM_017434 | DUOX1 | 1 |
| hsa-miR-4731 | NM_017434 | DUOX1 | 1 |
| hsa-miR-371b | NM_017434 | DUOX1 | 1 |
| hsa-miR-4763 | NM_017434 | DUOX1 | 1 |
| hsa-miR-4785 | NM_017434 | DUOX1 | 1 |
| hsa-miR-5002 | NM_017434 | DUOX1 | 1 |
| hsa-miR-5011 | NM_017434 | DUOX1 | 1 |
| hsa-miR-5185 | NM_017434 | DUOX1 | 1 |
| hsa-miR-664b | NM_017434 | DUOX1 | 1 |
| hsa-miR-5584 | NM_017434 | DUOX1 | 1 |
| hsa-miR-5681 | NM_017434 | DUOX1 | 1 |
| hsa-miR-5702 | NM_017434 | DUOX1 | 1 |
| hsa-miR-5703 | NM_017434 | DUOX1 | 1 |
| hsa-miR-1195 | NM_017434 | DUOX1 | 1 |
| hsa-miR-6133 | NM_017434 | DUOX1 | 1 |
| hsa-miR-6505 | NM_017434 | DUOX1 | 1 |
| hsa-miR-6505 | NM_017434 | DUOX1 | 1 |
| hsa-miR-651C | NM_017434 | DUOX1 | 1 |
| hsa-miR-651C | NM_017434 | DUOX1 | 1 |
| hsa-miR-6512 | NM_017434 | DUOX1 | 1 |
| hsa-miR-6511 | NM_017434 | DUOX1 | 1 |
| hsa-miR-6722 | NM_017434 | DUOX1 | 1 |
| hsa-miR-6731 | NM_017434 | DUOX1 | 1 |
| hsa-miR-6738 | NM_017434 | DUOX1 | 1 |
| hsa-miR-674C | NM_017434 | DUOX1 | 1 |
| hsa-miR-6742 | NM_017434 | DUOX1 | 1 |
| hsa-miR-6748 | NM_017434 | DUOX1 | 1 |
| hsa-miR-6753 | NM_017434 | DUOX1 | 1 |
| hsa-miR-6761 | NM_017434 | DUOX1 | 1 |
| hsa-miR-6763 | NM_017434 | DUOX1 | 1 |
| hsa-miR-6766 | NM_017434 | DUOX1 | 1 |
| hsa-miR-6765 | NM_017434 | DUOX1 | 1 |
| hsa-miR-6772 | NM_017434 | DUOX1 | 1 |
| hsa-miR-6774 | NM_017434 | DUOX1 | 1 |
| hsa-miR-678C | NM_017434 | DUOX1 | 1 |
| hsa-miR-6784 | NM_017434 | DUOX1 | 1 |
| hsa-miR-6785 | NM_017434 | DUOX1 | 1 |
| hsa-miR-6788 | NM_017434 | DUOX1 | 1 |
| hsa-miR-6794 | NM_017434 | DUOX1 | 1 |
| hsa-miR-6794 | NM_017434 | DUOX1 | 1 |
| hsa-miR-6798 | NM_017434 | DUOX1 | 1 |



|                         |        |            |
|-------------------------|--------|------------|
| hsa-miR-6802 NM_017434  | DUOX1  | 1          |
| hsa-miR-6821 NM_017434  | DUOX1  | 1          |
| hsa-miR-6824 NM_017434  | DUOX1  | 1          |
| hsa-miR-6825 NM_017434  | DUOX1  | 1          |
| hsa-miR-6833 NM_017434  | DUOX1  | 1          |
| hsa-miR-6834 NM_017434  | DUOX1  | 1          |
| hsa-miR-678C NM_017434  | DUOX1  | 1          |
| hsa-miR-6848 NM_017434  | DUOX1  | 1          |
| hsa-miR-6765 NM_017434  | DUOX1  | 1          |
| hsa-miR-687C NM_017434  | DUOX1  | 1          |
| hsa-miR-6874 NM_017434  | DUOX1  | 1          |
| hsa-miR-6876 NM_017434  | DUOX1  | 1          |
| hsa-miR-6886 NM_017434  | DUOX1  | 1          |
| hsa-miR-6886 NM_017434  | DUOX1  | 1          |
| hsa-miR-711C NM_017434  | DUOX1  | 1          |
| hsa-miR-711C NM_017434  | DUOX1  | 1          |
| hsa-miR-4433 NM_017434  | DUOX1  | 1          |
| hsa-miR-4433 NM_017434  | DUOX1  | 1          |
| hsa-miR-806C NM_017434  | DUOX1  | 1          |
| hsa-miR-807C NM_017434  | DUOX1  | 1          |
| hsa-miR-8077 NM_017434  | DUOX1  | 1          |
| hsa-miR-9718 NM_017434  | DUOX1  | 1          |
| hsa-miR-9986 NM_017434  | DUOX1  | 1          |
| hsa-miR-1035 NM_017434  | DUOX1  | 1          |
| hsa-miR-104C NM_017434  | DUOX1  | 1          |
| hsa-miR-104C NM_017434  | DUOX1  | 1          |
| hsa-miR-1052 NM_017434  | DUOX1  | 1          |
| hsa-miR-1052 NM_017434  | DUOX1  | 1          |
| hsa-miR-1118 NM_017434  | DUOX1  | 1          |
| hsa-miR-1118 NM_017434  | DUOX1  | 1          |
| hsa-miR-1211 NM_017434  | DUOX1  | 1          |
| hsa-miR-1212 NM_017434  | DUOX1  | 1          |
| hsa-miR-5581 NM_018951  | HOXA10 | 0.95384615 |
| hsa-miR-6718 NM_018951  | HOXA10 | 0.95384615 |
| hsa-miR-129- NM_018951  | HOXA10 | 0.96153846 |
| hsa-miR-204- NM_018951  | HOXA10 | 0.96153846 |
| hsa-miR-664a NM_018951  | HOXA10 | 0.96153846 |
| hsa-miR-3165 NM_018951  | HOXA10 | 0.96153846 |
| hsa-miR-362C NM_018951  | HOXA10 | 0.96153846 |
| hsa-miR-1587 NM_018951  | HOXA10 | 0.96153846 |
| hsa-miR-4645 NM_018951  | HOXA10 | 0.96153846 |
| hsa-miR-4764 NM_018951  | HOXA10 | 0.96153846 |
| hsa-miR-6855 NM_018951  | HOXA10 | 0.96153846 |
| hsa-miR-3151 NM_018951  | HOXA10 | 0.96923077 |
| hsa-miR-145- NM_018951  | HOXA10 | 0.98076923 |
| hsa-miR-3141 NM_018951  | HOXA10 | 0.98076923 |
| hsa-miR-6808 NM_018951  | HOXA10 | 0.98076923 |
| hsa-miR-18a- NM_018951  | HOXA10 | 1          |
| hsa-miR-106a NM_018951  | HOXA10 | 1          |
| hsa-miR-7-2-3 NM_018951 | HOXA10 | 1          |
| hsa-miR-23b- NM_018951  | HOXA10 | 1          |
| hsa-miR-127- NM_018951  | HOXA10 | 1          |
| hsa-miR-127- NM_018951  | HOXA10 | 1          |
| hsa-miR-129- NM_018951  | HOXA10 | 1          |
| hsa-miR-320a NM_018951  | HOXA10 | 1          |
| hsa-miR-30c- NM_018951  | HOXA10 | 1          |
| hsa-miR-219a NM_018951  | HOXA10 | 1          |
| hsa-miR-99b- NM_018951  | HOXA10 | 1          |
| hsa-miR-361- NM_018951  | HOXA10 | 1          |
| hsa-miR-302c NM_018951  | HOXA10 | 1          |
| hsa-miR-378a NM_018951  | HOXA10 | 1          |
| hsa-miR-148b NM_018951  | HOXA10 | 1          |
| hsa-miR-339- NM_018951  | HOXA10 | 1          |
| hsa-miR-424- NM_018951  | HOXA10 | 1          |
| hsa-miR-425- NM_018951  | HOXA10 | 1          |
| hsa-miR-448 NM_018951   | HOXA10 | 1          |
| hsa-miR-483- NM_018951  | HOXA10 | 1          |
| hsa-miR-489- NM_018951  | HOXA10 | 1          |
| hsa-miR-490- NM_018951  | HOXA10 | 1          |
| hsa-miR-490- NM_018951  | HOXA10 | 1          |
| hsa-miR-494- NM_018951  | HOXA10 | 1          |
| hsa-miR-518c NM_018951  | HOXA10 | 1          |
| hsa-miR-520d NM_018951  | HOXA10 | 1          |
| hsa-miR-520d NM_018951  | HOXA10 | 1          |
| hsa-miR-576- NM_018951  | HOXA10 | 1          |
| hsa-miR-601 NM_018951   | HOXA10 | 1          |
| hsa-miR-615- NM_018951  | HOXA10 | 1          |
| hsa-miR-615- NM_018951  | HOXA10 | 1          |
| hsa-miR-618 NM_018951   | HOXA10 | 1          |
| hsa-miR-631 NM_018951   | HOXA10 | 1          |
| hsa-miR-640 NM_018951   | HOXA10 | 1          |
| hsa-miR-650 NM_018951   | HOXA10 | 1          |
| hsa-miR-1185 NM_018951  | HOXA10 | 1          |
| hsa-miR-769- NM_018951  | HOXA10 | 1          |
| hsa-miR-765 NM_018951   | HOXA10 | 1          |
| hsa-miR-875- NM_018951  | HOXA10 | 1          |
| hsa-miR-509- NM_018951  | HOXA10 | 1          |
| hsa-miR-1285 NM_018951  | HOXA10 | 1          |
| hsa-miR-1288 NM_018951  | HOXA10 | 1          |
| hsa-miR-664a NM_018951  | HOXA10 | 1          |
| hsa-miR-3125 NM_018951  | HOXA10 | 1          |
| hsa-miR-3144 NM_018951  | HOXA10 | 1          |
| hsa-miR-3161 NM_018951  | HOXA10 | 1          |
| hsa-miR-3165 NM_018951  | HOXA10 | 1          |

|                        |        |            |
|------------------------|--------|------------|
| hsa-miR-3166 NM_018951 | HOXA10 | 1          |
| hsa-miR-3168 NM_018951 | HOXA10 | 1          |
| hsa-miR-4303 NM_018951 | HOXA10 | 1          |
| hsa-miR-4253 NM_018951 | HOXA10 | 1          |
| hsa-miR-4265 NM_018951 | HOXA10 | 1          |
| hsa-miR-500b NM_018951 | HOXA10 | 1          |
| hsa-miR-3617 NM_018951 | HOXA10 | 1          |
| hsa-miR-3617 NM_018951 | HOXA10 | 1          |
| hsa-miR-23c NM_018951  | HOXA10 | 1          |
| hsa-miR-3622 NM_018951 | HOXA10 | 1          |
| hsa-miR-3907 NM_018951 | HOXA10 | 1          |
| hsa-miR-3922 NM_018951 | HOXA10 | 1          |
| hsa-miR-4482 NM_018951 | HOXA10 | 1          |
| hsa-miR-4507 NM_018951 | HOXA10 | 1          |
| hsa-miR-4512 NM_018951 | HOXA10 | 1          |
| hsa-miR-4521 NM_018951 | HOXA10 | 1          |
| hsa-miR-4522 NM_018951 | HOXA10 | 1          |
| hsa-miR-4534 NM_018951 | HOXA10 | 1          |
| hsa-miR-4540 NM_018951 | HOXA10 | 1          |
| hsa-miR-3973 NM_018951 | HOXA10 | 1          |
| hsa-miR-4652 NM_018951 | HOXA10 | 1          |
| hsa-miR-4653 NM_018951 | HOXA10 | 1          |
| hsa-miR-4654 NM_018951 | HOXA10 | 1          |
| hsa-miR-4665 NM_018951 | HOXA10 | 1          |
| hsa-miR-4681 NM_018951 | HOXA10 | 1          |
| hsa-miR-4685 NM_018951 | HOXA10 | 1          |
| hsa-miR-4692 NM_018951 | HOXA10 | 1          |
| hsa-miR-4712 NM_018951 | HOXA10 | 1          |
| hsa-miR-4714 NM_018951 | HOXA10 | 1          |
| hsa-miR-4716 NM_018951 | HOXA10 | 1          |
| hsa-miR-4742 NM_018951 | HOXA10 | 1          |
| hsa-miR-4743 NM_018951 | HOXA10 | 1          |
| hsa-miR-4746 NM_018951 | HOXA10 | 1          |
| hsa-miR-4747 NM_018951 | HOXA10 | 1          |
| hsa-miR-371b NM_018951 | HOXA10 | 1          |
| hsa-miR-4768 NM_018951 | HOXA10 | 1          |
| hsa-miR-4772 NM_018951 | HOXA10 | 1          |
| hsa-miR-4776 NM_018951 | HOXA10 | 1          |
| hsa-miR-4780 NM_018951 | HOXA10 | 1          |
| hsa-miR-4782 NM_018951 | HOXA10 | 1          |
| hsa-miR-4800 NM_018951 | HOXA10 | 1          |
| hsa-miR-5004 NM_018951 | HOXA10 | 1          |
| hsa-miR-5006 NM_018951 | HOXA10 | 1          |
| hsa-miR-5088 NM_018951 | HOXA10 | 1          |
| hsa-miR-5191 NM_018951 | HOXA10 | 1          |
| hsa-miR-5196 NM_018951 | HOXA10 | 1          |
| hsa-miR-5571 NM_018951 | HOXA10 | 1          |
| hsa-miR-6124 NM_018951 | HOXA10 | 1          |
| hsa-miR-6512 NM_018951 | HOXA10 | 1          |
| hsa-miR-6515 NM_018951 | HOXA10 | 1          |
| hsa-miR-6515 NM_018951 | HOXA10 | 1          |
| hsa-miR-6716 NM_018951 | HOXA10 | 1          |
| hsa-miR-6717 NM_018951 | HOXA10 | 1          |
| hsa-miR-6720 NM_018951 | HOXA10 | 1          |
| hsa-miR-892c NM_018951 | HOXA10 | 1          |
| hsa-miR-6735 NM_018951 | HOXA10 | 1          |
| hsa-miR-6742 NM_018951 | HOXA10 | 1          |
| hsa-miR-6760 NM_018951 | HOXA10 | 1          |
| hsa-miR-6762 NM_018951 | HOXA10 | 1          |
| hsa-miR-6768 NM_018951 | HOXA10 | 1          |
| hsa-miR-6775 NM_018951 | HOXA10 | 1          |
| hsa-miR-6783 NM_018951 | HOXA10 | 1          |
| hsa-miR-6794 NM_018951 | HOXA10 | 1          |
| hsa-miR-6798 NM_018951 | HOXA10 | 1          |
| hsa-miR-6811 NM_018951 | HOXA10 | 1          |
| hsa-miR-6830 NM_018951 | HOXA10 | 1          |
| hsa-miR-6830 NM_018951 | HOXA10 | 1          |
| hsa-miR-6780 NM_018951 | HOXA10 | 1          |
| hsa-miR-6837 NM_018951 | HOXA10 | 1          |
| hsa-miR-6848 NM_018951 | HOXA10 | 1          |
| hsa-miR-6849 NM_018951 | HOXA10 | 1          |
| hsa-miR-6851 NM_018951 | HOXA10 | 1          |
| hsa-miR-6862 NM_018951 | HOXA10 | 1          |
| hsa-miR-6865 NM_018951 | HOXA10 | 1          |
| hsa-miR-6867 NM_018951 | HOXA10 | 1          |
| hsa-miR-6876 NM_018951 | HOXA10 | 1          |
| hsa-miR-6878 NM_018951 | HOXA10 | 1          |
| hsa-miR-6883 NM_018951 | HOXA10 | 1          |
| hsa-miR-6887 NM_018951 | HOXA10 | 1          |
| hsa-miR-6891 NM_018951 | HOXA10 | 1          |
| hsa-miR-6895 NM_018951 | HOXA10 | 1          |
| hsa-miR-6895 NM_018951 | HOXA10 | 1          |
| hsa-miR-7107 NM_018951 | HOXA10 | 1          |
| hsa-miR-7112 NM_018951 | HOXA10 | 1          |
| hsa-miR-7846 NM_018951 | HOXA10 | 1          |
| hsa-miR-8060 NM_018951 | HOXA10 | 1          |
| hsa-miR-8073 NM_018951 | HOXA10 | 1          |
| hsa-miR-8082 NM_018951 | HOXA10 | 1          |
| hsa-miR-9902 NM_018951 | HOXA10 | 1          |
| hsa-miR-1039 NM_018951 | HOXA10 | 1          |
| hsa-miR-1211 NM_018951 | HOXA10 | 1          |
| hsa-miR-1211 NM_018951 | HOXA10 | 1          |
| hsa-miR-6745 NM_021950 | MS4A1  | 0.95384615 |
| hsa-miR-196b NM_152866 | MS4A1  | 0.96153846 |

|                         |       |            |
|-------------------------|-------|------------|
| hsa-miR-1276 NM_152866  | MS4A1 | 0.96153846 |
| hsa-miR-191C NM_152866  | MS4A1 | 0.96153846 |
| hsa-miR-317C NM_152866  | MS4A1 | 0.96153846 |
| hsa-miR-518S NM_152866  | MS4A1 | 0.96153846 |
| hsa-miR-679S NM_152866  | MS4A1 | 0.96153846 |
| hsa-miR-6851 NM_152866  | MS4A1 | 0.96153846 |
| hsa-miR-196t NM_152867  | MS4A1 | 0.96153846 |
| hsa-miR-1276 NM_152867  | MS4A1 | 0.96153846 |
| hsa-miR-191C NM_152867  | MS4A1 | 0.96153846 |
| hsa-miR-317C NM_152867  | MS4A1 | 0.96153846 |
| hsa-miR-518S NM_152867  | MS4A1 | 0.96153846 |
| hsa-miR-679S NM_152867  | MS4A1 | 0.96153846 |
| hsa-miR-6851 NM_152867  | MS4A1 | 0.96153846 |
| hsa-miR-492 NM_021950   | MS4A1 | 0.96153846 |
| hsa-miR-1276 NM_021950  | MS4A1 | 0.96153846 |
| hsa-miR-191C NM_021950  | MS4A1 | 0.96153846 |
| hsa-miR-317C NM_021950  | MS4A1 | 0.96153846 |
| hsa-miR-318C NM_021950  | MS4A1 | 0.96153846 |
| hsa-miR-679S NM_021950  | MS4A1 | 0.96153846 |
| hsa-miR-6851 NM_021950  | MS4A1 | 0.96153846 |
| hsa-miR-3136 NM_152866  | MS4A1 | 0.97435897 |
| hsa-miR-371t NM_152866  | MS4A1 | 0.97435897 |
| hsa-miR-6772 NM_152866  | MS4A1 | 0.97435897 |
| hsa-miR-3136 NM_152867  | MS4A1 | 0.97435897 |
| hsa-miR-371t NM_152867  | MS4A1 | 0.97435897 |
| hsa-miR-6772 NM_152867  | MS4A1 | 0.97435897 |
| hsa-miR-4651 NM_021950  | MS4A1 | 0.97435897 |
| hsa-miR-371t NM_021950  | MS4A1 | 0.97435897 |
| hsa-miR-487a NM_152866  | MS4A1 | 0.98076923 |
| hsa-miR-427C NM_152866  | MS4A1 | 0.98076923 |
| hsa-miR-465C NM_152866  | MS4A1 | 0.98076923 |
| hsa-miR-6133 NM_152866  | MS4A1 | 0.98076923 |
| hsa-miR-8071 NM_152866  | MS4A1 | 0.98076923 |
| hsa-miR-487a NM_152867  | MS4A1 | 0.98076923 |
| hsa-miR-427C NM_152867  | MS4A1 | 0.98076923 |
| hsa-miR-465C NM_152867  | MS4A1 | 0.98076923 |
| hsa-miR-6133 NM_152867  | MS4A1 | 0.98076923 |
| hsa-miR-8071 NM_152867  | MS4A1 | 0.98076923 |
| hsa-miR-1228 NM_021950  | MS4A1 | 0.98076923 |
| hsa-miR-427C NM_021950  | MS4A1 | 0.98076923 |
| hsa-miR-647 NM_152866   | MS4A1 | 0.98717949 |
| hsa-miR-647 NM_152867   | MS4A1 | 0.98717949 |
| hsa-miR-647 NM_021950   | MS4A1 | 0.98717949 |
| hsa-miR-22-3j NM_152866 | MS4A1 | 1          |
| hsa-miR-25-5j NM_152866 | MS4A1 | 1          |
| hsa-miR-27a- NM_152866  | MS4A1 | 1          |
| hsa-miR-92a- NM_152866  | MS4A1 | 1          |
| hsa-miR-96-3j NM_152866 | MS4A1 | 1          |
| hsa-miR-197- NM_152866  | MS4A1 | 1          |
| hsa-miR-34a- NM_152866  | MS4A1 | 1          |
| hsa-miR-215- NM_152866  | MS4A1 | 1          |
| hsa-miR-216a NM_152866  | MS4A1 | 1          |
| hsa-miR-224- NM_152866  | MS4A1 | 1          |
| hsa-miR-124- NM_152866  | MS4A1 | 1          |
| hsa-miR-135a NM_152866  | MS4A1 | 1          |
| hsa-miR-138- NM_152866  | MS4A1 | 1          |
| hsa-miR-140- NM_152866  | MS4A1 | 1          |
| hsa-miR-143- NM_152866  | MS4A1 | 1          |
| hsa-miR-152- NM_152866  | MS4A1 | 1          |
| hsa-miR-361- NM_152866  | MS4A1 | 1          |
| hsa-miR-365a NM_152866  | MS4A1 | 1          |
| hsa-miR-376c NM_152866  | MS4A1 | 1          |
| hsa-miR-330- NM_152866  | MS4A1 | 1          |
| hsa-miR-148t NM_152866  | MS4A1 | 1          |
| hsa-miR-20b- NM_152866  | MS4A1 | 1          |
| hsa-miR-409- NM_152866  | MS4A1 | 1          |
| hsa-miR-483- NM_152866  | MS4A1 | 1          |
| hsa-miR-484 NM_152866   | MS4A1 | 1          |
| hsa-miR-486- NM_152866  | MS4A1 | 1          |
| hsa-miR-146t NM_152866  | MS4A1 | 1          |
| hsa-miR-432- NM_152866  | MS4A1 | 1          |
| hsa-miR-494- NM_152866  | MS4A1 | 1          |
| hsa-miR-520a NM_152866  | MS4A1 | 1          |
| hsa-miR-525- NM_152866  | MS4A1 | 1          |
| hsa-miR-524- NM_152866  | MS4A1 | 1          |
| hsa-miR-509- NM_152866  | MS4A1 | 1          |
| hsa-miR-532- NM_152866  | MS4A1 | 1          |
| hsa-miR-557 NM_152866   | MS4A1 | 1          |
| hsa-miR-564 NM_152866   | MS4A1 | 1          |
| hsa-miR-574- NM_152866  | MS4A1 | 1          |
| hsa-miR-550a NM_152866  | MS4A1 | 1          |
| hsa-miR-591 NM_152866   | MS4A1 | 1          |
| hsa-miR-597- NM_152866  | MS4A1 | 1          |
| hsa-miR-614 NM_152866   | MS4A1 | 1          |
| hsa-miR-632 NM_152866   | MS4A1 | 1          |
| hsa-miR-639 NM_152866   | MS4A1 | 1          |
| hsa-miR-642a NM_152866  | MS4A1 | 1          |
| hsa-miR-671- NM_152866  | MS4A1 | 1          |
| hsa-miR-668- NM_152866  | MS4A1 | 1          |
| hsa-miR-1271 NM_152866  | MS4A1 | 1          |
| hsa-miR-1301 NM_152866  | MS4A1 | 1          |
| hsa-miR-766- NM_152866  | MS4A1 | 1          |
| hsa-miR-759 NM_152866   | MS4A1 | 1          |
| hsa-miR-765 NM_152866   | MS4A1 | 1          |

|                        |       |   |
|------------------------|-------|---|
| hsa-miR-887-NM_152866  | MS4A1 | 1 |
| hsa-miR-873-NM_152866  | MS4A1 | 1 |
| hsa-miR-936 NM_152866  | MS4A1 | 1 |
| hsa-miR-1178 NM_152866 | MS4A1 | 1 |
| hsa-miR-1226 NM_152866 | MS4A1 | 1 |
| hsa-miR-1226 NM_152866 | MS4A1 | 1 |
| hsa-miR-1227 NM_152866 | MS4A1 | 1 |
| hsa-miR-1228 NM_152866 | MS4A1 | 1 |
| hsa-miR-1234 NM_152866 | MS4A1 | 1 |
| hsa-miR-1208 NM_152866 | MS4A1 | 1 |
| hsa-miR-1247 NM_152866 | MS4A1 | 1 |
| hsa-miR-1256 NM_152866 | MS4A1 | 1 |
| hsa-miR-1266 NM_152866 | MS4A1 | 1 |
| hsa-miR-1275 NM_152866 | MS4A1 | 1 |
| hsa-miR-1905 NM_152866 | MS4A1 | 1 |
| hsa-miR-1911 NM_152866 | MS4A1 | 1 |
| hsa-miR-1915 NM_152866 | MS4A1 | 1 |
| hsa-miR-1973 NM_152866 | MS4A1 | 1 |
| hsa-miR-2110 NM_152866 | MS4A1 | 1 |
| hsa-miR-2278 NM_152866 | MS4A1 | 1 |
| hsa-miR-3125 NM_152866 | MS4A1 | 1 |
| hsa-miR-3074 NM_152866 | MS4A1 | 1 |
| hsa-miR-3156 NM_152866 | MS4A1 | 1 |
| hsa-miR-3158 NM_152866 | MS4A1 | 1 |
| hsa-miR-3160 NM_152866 | MS4A1 | 1 |
| hsa-miR-3162 NM_152866 | MS4A1 | 1 |
| hsa-miR-3176 NM_152866 | MS4A1 | 1 |
| hsa-miR-3180 NM_152866 | MS4A1 | 1 |
| hsa-miR-3184 NM_152866 | MS4A1 | 1 |
| hsa-miR-3189 NM_152866 | MS4A1 | 1 |
| hsa-miR-3192 NM_152866 | MS4A1 | 1 |
| hsa-miR-3193 NM_152866 | MS4A1 | 1 |
| hsa-miR-3194 NM_152866 | MS4A1 | 1 |
| hsa-miR-3196 NM_152866 | MS4A1 | 1 |
| hsa-miR-3198 NM_152866 | MS4A1 | 1 |
| hsa-miR-3199 NM_152866 | MS4A1 | 1 |
| hsa-miR-4298 NM_152866 | MS4A1 | 1 |
| hsa-miR-4312 NM_152866 | MS4A1 | 1 |
| hsa-miR-4252 NM_152866 | MS4A1 | 1 |
| hsa-miR-4265 NM_152866 | MS4A1 | 1 |
| hsa-miR-3616 NM_152866 | MS4A1 | 1 |
| hsa-miR-3661 NM_152866 | MS4A1 | 1 |
| hsa-miR-3664 NM_152866 | MS4A1 | 1 |
| hsa-miR-3680 NM_152866 | MS4A1 | 1 |
| hsa-miR-3690 NM_152866 | MS4A1 | 1 |
| hsa-miR-3691 NM_152866 | MS4A1 | 1 |
| hsa-miR-3692 NM_152866 | MS4A1 | 1 |
| hsa-miR-3917 NM_152866 | MS4A1 | 1 |
| hsa-miR-3918 NM_152866 | MS4A1 | 1 |
| hsa-miR-3921 NM_152866 | MS4A1 | 1 |
| hsa-miR-3925 NM_152866 | MS4A1 | 1 |
| hsa-miR-3936 NM_152866 | MS4A1 | 1 |
| hsa-miR-3944 NM_152866 | MS4A1 | 1 |
| hsa-miR-4420 NM_152866 | MS4A1 | 1 |
| hsa-miR-4421 NM_152866 | MS4A1 | 1 |
| hsa-miR-4422 NM_152866 | MS4A1 | 1 |
| hsa-miR-4428 NM_152866 | MS4A1 | 1 |
| hsa-miR-4433 NM_152866 | MS4A1 | 1 |
| hsa-miR-4435 NM_152866 | MS4A1 | 1 |
| hsa-miR-4482 NM_152866 | MS4A1 | 1 |
| hsa-miR-4483 NM_152866 | MS4A1 | 1 |
| hsa-miR-4485 NM_152866 | MS4A1 | 1 |
| hsa-miR-4502 NM_152866 | MS4A1 | 1 |
| hsa-miR-2392 NM_152866 | MS4A1 | 1 |
| hsa-miR-4524 NM_152866 | MS4A1 | 1 |
| hsa-miR-4525 NM_152866 | MS4A1 | 1 |
| hsa-miR-4644 NM_152866 | MS4A1 | 1 |
| hsa-miR-4647 NM_152866 | MS4A1 | 1 |
| hsa-miR-4655 NM_152866 | MS4A1 | 1 |
| hsa-miR-4658 NM_152866 | MS4A1 | 1 |
| hsa-miR-4661 NM_152866 | MS4A1 | 1 |
| hsa-miR-4682 NM_152866 | MS4A1 | 1 |
| hsa-miR-4685 NM_152866 | MS4A1 | 1 |
| hsa-miR-4686 NM_152866 | MS4A1 | 1 |
| hsa-miR-4700 NM_152866 | MS4A1 | 1 |
| hsa-miR-4715 NM_152866 | MS4A1 | 1 |
| hsa-miR-4720 NM_152866 | MS4A1 | 1 |
| hsa-miR-4722 NM_152866 | MS4A1 | 1 |
| hsa-miR-4723 NM_152866 | MS4A1 | 1 |
| hsa-miR-4726 NM_152866 | MS4A1 | 1 |
| hsa-miR-4738 NM_152866 | MS4A1 | 1 |
| hsa-miR-4739 NM_152866 | MS4A1 | 1 |
| hsa-miR-4747 NM_152866 | MS4A1 | 1 |
| hsa-miR-4747 NM_152866 | MS4A1 | 1 |
| hsa-miR-4748 NM_152866 | MS4A1 | 1 |
| hsa-miR-4754 NM_152866 | MS4A1 | 1 |
| hsa-miR-4754 NM_152866 | MS4A1 | 1 |
| hsa-miR-4765 NM_152866 | MS4A1 | 1 |
| hsa-miR-4774 NM_152866 | MS4A1 | 1 |
| hsa-miR-4783 NM_152866 | MS4A1 | 1 |
| hsa-miR-4802 NM_152866 | MS4A1 | 1 |
| hsa-miR-5007 NM_152866 | MS4A1 | 1 |
| hsa-miR-5090 NM_152866 | MS4A1 | 1 |
| hsa-miR-4524 NM_152866 | MS4A1 | 1 |

|                         |       |   |
|-------------------------|-------|---|
| hsa-miR-5571 NM_152866  | MS4A1 | 1 |
| hsa-miR-664b NM_152866  | MS4A1 | 1 |
| hsa-miR-5692 NM_152866  | MS4A1 | 1 |
| hsa-miR-6124 NM_152866  | MS4A1 | 1 |
| hsa-miR-6126 NM_152866  | MS4A1 | 1 |
| hsa-miR-6127 NM_152866  | MS4A1 | 1 |
| hsa-miR-6131 NM_152866  | MS4A1 | 1 |
| hsa-miR-6504 NM_152866  | MS4A1 | 1 |
| hsa-miR-6511 NM_152866  | MS4A1 | 1 |
| hsa-miR-6514 NM_152866  | MS4A1 | 1 |
| hsa-miR-6717 NM_152866  | MS4A1 | 1 |
| hsa-miR-6718 NM_152866  | MS4A1 | 1 |
| hsa-miR-6727 NM_152866  | MS4A1 | 1 |
| hsa-miR-6730 NM_152866  | MS4A1 | 1 |
| hsa-miR-6730 NM_152866  | MS4A1 | 1 |
| hsa-miR-6733 NM_152866  | MS4A1 | 1 |
| hsa-miR-6745 NM_152866  | MS4A1 | 1 |
| hsa-miR-6745 NM_152866  | MS4A1 | 1 |
| hsa-miR-6745 NM_152866  | MS4A1 | 1 |
| hsa-miR-6746 NM_152866  | MS4A1 | 1 |
| hsa-miR-6748 NM_152866  | MS4A1 | 1 |
| hsa-miR-6749 NM_152866  | MS4A1 | 1 |
| hsa-miR-6751 NM_152866  | MS4A1 | 1 |
| hsa-miR-6753 NM_152866  | MS4A1 | 1 |
| hsa-miR-6757 NM_152866  | MS4A1 | 1 |
| hsa-miR-6758 NM_152866  | MS4A1 | 1 |
| hsa-miR-6767 NM_152866  | MS4A1 | 1 |
| hsa-miR-6770 NM_152866  | MS4A1 | 1 |
| hsa-miR-6772 NM_152866  | MS4A1 | 1 |
| hsa-miR-6779 NM_152866  | MS4A1 | 1 |
| hsa-miR-6789 NM_152866  | MS4A1 | 1 |
| hsa-miR-6791 NM_152866  | MS4A1 | 1 |
| hsa-miR-6792 NM_152866  | MS4A1 | 1 |
| hsa-miR-6794 NM_152866  | MS4A1 | 1 |
| hsa-miR-6804 NM_152866  | MS4A1 | 1 |
| hsa-miR-6806 NM_152866  | MS4A1 | 1 |
| hsa-miR-6807 NM_152866  | MS4A1 | 1 |
| hsa-miR-6809 NM_152866  | MS4A1 | 1 |
| hsa-miR-6813 NM_152866  | MS4A1 | 1 |
| hsa-miR-6814 NM_152866  | MS4A1 | 1 |
| hsa-miR-6815 NM_152866  | MS4A1 | 1 |
| hsa-miR-6816 NM_152866  | MS4A1 | 1 |
| hsa-miR-6820 NM_152866  | MS4A1 | 1 |
| hsa-miR-6821 NM_152866  | MS4A1 | 1 |
| hsa-miR-6822 NM_152866  | MS4A1 | 1 |
| hsa-miR-6823 NM_152866  | MS4A1 | 1 |
| hsa-miR-6823 NM_152866  | MS4A1 | 1 |
| hsa-miR-6826 NM_152866  | MS4A1 | 1 |
| hsa-miR-6832 NM_152866  | MS4A1 | 1 |
| hsa-miR-6833 NM_152866  | MS4A1 | 1 |
| hsa-miR-6834 NM_152866  | MS4A1 | 1 |
| hsa-miR-6780 NM_152866  | MS4A1 | 1 |
| hsa-miR-6835 NM_152866  | MS4A1 | 1 |
| hsa-miR-6843 NM_152866  | MS4A1 | 1 |
| hsa-miR-6845 NM_152866  | MS4A1 | 1 |
| hsa-miR-6847 NM_152866  | MS4A1 | 1 |
| hsa-miR-6856 NM_152866  | MS4A1 | 1 |
| hsa-miR-6866 NM_152866  | MS4A1 | 1 |
| hsa-miR-6869 NM_152866  | MS4A1 | 1 |
| hsa-miR-6871 NM_152866  | MS4A1 | 1 |
| hsa-miR-6871 NM_152866  | MS4A1 | 1 |
| hsa-miR-6873 NM_152866  | MS4A1 | 1 |
| hsa-miR-6875 NM_152866  | MS4A1 | 1 |
| hsa-miR-6878 NM_152866  | MS4A1 | 1 |
| hsa-miR-6886 NM_152866  | MS4A1 | 1 |
| hsa-miR-6889 NM_152866  | MS4A1 | 1 |
| hsa-miR-6892 NM_152866  | MS4A1 | 1 |
| hsa-miR-6893 NM_152866  | MS4A1 | 1 |
| hsa-miR-7107 NM_152866  | MS4A1 | 1 |
| hsa-miR-7158 NM_152866  | MS4A1 | 1 |
| hsa-miR-7704 NM_152866  | MS4A1 | 1 |
| hsa-miR-7705 NM_152866  | MS4A1 | 1 |
| hsa-miR-7974 NM_152866  | MS4A1 | 1 |
| hsa-miR-8060 NM_152866  | MS4A1 | 1 |
| hsa-miR-8069 NM_152866  | MS4A1 | 1 |
| hsa-miR-8071 NM_152866  | MS4A1 | 1 |
| hsa-miR-8073 NM_152866  | MS4A1 | 1 |
| hsa-miR-8078 NM_152866  | MS4A1 | 1 |
| hsa-miR-1039 NM_152866  | MS4A1 | 1 |
| hsa-miR-1039 NM_152866  | MS4A1 | 1 |
| hsa-miR-1040 NM_152866  | MS4A1 | 1 |
| hsa-miR-1040 NM_152866  | MS4A1 | 1 |
| hsa-miR-1118 NM_152866  | MS4A1 | 1 |
| hsa-miR-1211 NM_152866  | MS4A1 | 1 |
| hsa-miR-1211 NM_152866  | MS4A1 | 1 |
| hsa-miR-1212 NM_152866  | MS4A1 | 1 |
| hsa-miR-22-3j NM_152867 | MS4A1 | 1 |
| hsa-miR-25-5j NM_152867 | MS4A1 | 1 |
| hsa-miR-27a- NM_152867  | MS4A1 | 1 |
| hsa-miR-92a- NM_152867  | MS4A1 | 1 |
| hsa-miR-96-3j NM_152867 | MS4A1 | 1 |
| hsa-miR-197- NM_152867  | MS4A1 | 1 |
| hsa-miR-34a- NM_152867  | MS4A1 | 1 |
| hsa-miR-215- NM_152867  | MS4A1 | 1 |

|              |            |       |   |
|--------------|------------|-------|---|
| hsa-miR-216a | NM_152867  | MS4A1 | 1 |
| hsa-miR-224  | -NM_152867 | MS4A1 | 1 |
| hsa-miR-124  | -NM_152867 | MS4A1 | 1 |
| hsa-miR-135a | NM_152867  | MS4A1 | 1 |
| hsa-miR-138  | -NM_152867 | MS4A1 | 1 |
| hsa-miR-140  | -NM_152867 | MS4A1 | 1 |
| hsa-miR-143  | -NM_152867 | MS4A1 | 1 |
| hsa-miR-152  | -NM_152867 | MS4A1 | 1 |
| hsa-miR-361  | -NM_152867 | MS4A1 | 1 |
| hsa-miR-365a | NM_152867  | MS4A1 | 1 |
| hsa-miR-376c | NM_152867  | MS4A1 | 1 |
| hsa-miR-330  | -NM_152867 | MS4A1 | 1 |
| hsa-miR-148b | NM_152867  | MS4A1 | 1 |
| hsa-miR-20b  | -NM_152867 | MS4A1 | 1 |
| hsa-miR-409  | -NM_152867 | MS4A1 | 1 |
| hsa-miR-483  | -NM_152867 | MS4A1 | 1 |
| hsa-miR-484  | NM_152867  | MS4A1 | 1 |
| hsa-miR-486  | -NM_152867 | MS4A1 | 1 |
| hsa-miR-146b | NM_152867  | MS4A1 | 1 |
| hsa-miR-432  | -NM_152867 | MS4A1 | 1 |
| hsa-miR-494  | -NM_152867 | MS4A1 | 1 |
| hsa-miR-520a | NM_152867  | MS4A1 | 1 |
| hsa-miR-525  | -NM_152867 | MS4A1 | 1 |
| hsa-miR-524  | -NM_152867 | MS4A1 | 1 |
| hsa-miR-509  | -NM_152867 | MS4A1 | 1 |
| hsa-miR-532  | -NM_152867 | MS4A1 | 1 |
| hsa-miR-557  | NM_152867  | MS4A1 | 1 |
| hsa-miR-564  | NM_152867  | MS4A1 | 1 |
| hsa-miR-574  | -NM_152867 | MS4A1 | 1 |
| hsa-miR-550a | NM_152867  | MS4A1 | 1 |
| hsa-miR-591  | NM_152867  | MS4A1 | 1 |
| hsa-miR-597  | -NM_152867 | MS4A1 | 1 |
| hsa-miR-614  | NM_152867  | MS4A1 | 1 |
| hsa-miR-632  | NM_152867  | MS4A1 | 1 |
| hsa-miR-639  | NM_152867  | MS4A1 | 1 |
| hsa-miR-642a | NM_152867  | MS4A1 | 1 |
| hsa-miR-671  | -NM_152867 | MS4A1 | 1 |
| hsa-miR-668  | -NM_152867 | MS4A1 | 1 |
| hsa-miR-1271 | NM_152867  | MS4A1 | 1 |
| hsa-miR-1301 | NM_152867  | MS4A1 | 1 |
| hsa-miR-766  | -NM_152867 | MS4A1 | 1 |
| hsa-miR-759  | NM_152867  | MS4A1 | 1 |
| hsa-miR-765  | NM_152867  | MS4A1 | 1 |
| hsa-miR-887  | -NM_152867 | MS4A1 | 1 |
| hsa-miR-873  | -NM_152867 | MS4A1 | 1 |
| hsa-miR-936  | NM_152867  | MS4A1 | 1 |
| hsa-miR-1178 | NM_152867  | MS4A1 | 1 |
| hsa-miR-1226 | NM_152867  | MS4A1 | 1 |
| hsa-miR-1226 | NM_152867  | MS4A1 | 1 |
| hsa-miR-1227 | NM_152867  | MS4A1 | 1 |
| hsa-miR-1228 | NM_152867  | MS4A1 | 1 |
| hsa-miR-1234 | NM_152867  | MS4A1 | 1 |
| hsa-miR-1208 | NM_152867  | MS4A1 | 1 |
| hsa-miR-1247 | NM_152867  | MS4A1 | 1 |
| hsa-miR-1256 | NM_152867  | MS4A1 | 1 |
| hsa-miR-1266 | NM_152867  | MS4A1 | 1 |
| hsa-miR-1275 | NM_152867  | MS4A1 | 1 |
| hsa-miR-1905 | NM_152867  | MS4A1 | 1 |
| hsa-miR-1911 | NM_152867  | MS4A1 | 1 |
| hsa-miR-1915 | NM_152867  | MS4A1 | 1 |
| hsa-miR-1973 | NM_152867  | MS4A1 | 1 |
| hsa-miR-211C | NM_152867  | MS4A1 | 1 |
| hsa-miR-2278 | NM_152867  | MS4A1 | 1 |
| hsa-miR-3125 | NM_152867  | MS4A1 | 1 |
| hsa-miR-3074 | NM_152867  | MS4A1 | 1 |
| hsa-miR-3156 | NM_152867  | MS4A1 | 1 |
| hsa-miR-3158 | NM_152867  | MS4A1 | 1 |
| hsa-miR-316C | NM_152867  | MS4A1 | 1 |
| hsa-miR-3162 | NM_152867  | MS4A1 | 1 |
| hsa-miR-3176 | NM_152867  | MS4A1 | 1 |
| hsa-miR-318C | NM_152867  | MS4A1 | 1 |
| hsa-miR-3184 | NM_152867  | MS4A1 | 1 |
| hsa-miR-3185 | NM_152867  | MS4A1 | 1 |
| hsa-miR-3192 | NM_152867  | MS4A1 | 1 |
| hsa-miR-3193 | NM_152867  | MS4A1 | 1 |
| hsa-miR-3194 | NM_152867  | MS4A1 | 1 |
| hsa-miR-3196 | NM_152867  | MS4A1 | 1 |
| hsa-miR-3198 | NM_152867  | MS4A1 | 1 |
| hsa-miR-3199 | NM_152867  | MS4A1 | 1 |
| hsa-miR-4298 | NM_152867  | MS4A1 | 1 |
| hsa-miR-4312 | NM_152867  | MS4A1 | 1 |
| hsa-miR-4252 | NM_152867  | MS4A1 | 1 |
| hsa-miR-4265 | NM_152867  | MS4A1 | 1 |
| hsa-miR-3616 | NM_152867  | MS4A1 | 1 |
| hsa-miR-3661 | NM_152867  | MS4A1 | 1 |
| hsa-miR-3664 | NM_152867  | MS4A1 | 1 |
| hsa-miR-368C | NM_152867  | MS4A1 | 1 |
| hsa-miR-369C | NM_152867  | MS4A1 | 1 |
| hsa-miR-3691 | NM_152867  | MS4A1 | 1 |
| hsa-miR-3692 | NM_152867  | MS4A1 | 1 |
| hsa-miR-3917 | NM_152867  | MS4A1 | 1 |
| hsa-miR-3918 | NM_152867  | MS4A1 | 1 |
| hsa-miR-3921 | NM_152867  | MS4A1 | 1 |
| hsa-miR-3925 | NM_152867  | MS4A1 | 1 |

|                        |       |   |
|------------------------|-------|---|
| hsa-miR-3936 NM_152867 | MS4A1 | 1 |
| hsa-miR-3944 NM_152867 | MS4A1 | 1 |
| hsa-miR-4420 NM_152867 | MS4A1 | 1 |
| hsa-miR-4421 NM_152867 | MS4A1 | 1 |
| hsa-miR-4422 NM_152867 | MS4A1 | 1 |
| hsa-miR-4428 NM_152867 | MS4A1 | 1 |
| hsa-miR-4433 NM_152867 | MS4A1 | 1 |
| hsa-miR-4439 NM_152867 | MS4A1 | 1 |
| hsa-miR-4482 NM_152867 | MS4A1 | 1 |
| hsa-miR-4483 NM_152867 | MS4A1 | 1 |
| hsa-miR-4489 NM_152867 | MS4A1 | 1 |
| hsa-miR-4502 NM_152867 | MS4A1 | 1 |
| hsa-miR-2392 NM_152867 | MS4A1 | 1 |
| hsa-miR-4524 NM_152867 | MS4A1 | 1 |
| hsa-miR-4525 NM_152867 | MS4A1 | 1 |
| hsa-miR-4644 NM_152867 | MS4A1 | 1 |
| hsa-miR-4647 NM_152867 | MS4A1 | 1 |
| hsa-miR-4655 NM_152867 | MS4A1 | 1 |
| hsa-miR-4658 NM_152867 | MS4A1 | 1 |
| hsa-miR-4661 NM_152867 | MS4A1 | 1 |
| hsa-miR-4685 NM_152867 | MS4A1 | 1 |
| hsa-miR-4686 NM_152867 | MS4A1 | 1 |
| hsa-miR-4700 NM_152867 | MS4A1 | 1 |
| hsa-miR-4715 NM_152867 | MS4A1 | 1 |
| hsa-miR-4720 NM_152867 | MS4A1 | 1 |
| hsa-miR-4722 NM_152867 | MS4A1 | 1 |
| hsa-miR-4723 NM_152867 | MS4A1 | 1 |
| hsa-miR-4726 NM_152867 | MS4A1 | 1 |
| hsa-miR-4738 NM_152867 | MS4A1 | 1 |
| hsa-miR-4739 NM_152867 | MS4A1 | 1 |
| hsa-miR-4747 NM_152867 | MS4A1 | 1 |
| hsa-miR-4747 NM_152867 | MS4A1 | 1 |
| hsa-miR-4748 NM_152867 | MS4A1 | 1 |
| hsa-miR-4754 NM_152867 | MS4A1 | 1 |
| hsa-miR-4754 NM_152867 | MS4A1 | 1 |
| hsa-miR-4769 NM_152867 | MS4A1 | 1 |
| hsa-miR-4774 NM_152867 | MS4A1 | 1 |
| hsa-miR-4783 NM_152867 | MS4A1 | 1 |
| hsa-miR-4802 NM_152867 | MS4A1 | 1 |
| hsa-miR-5007 NM_152867 | MS4A1 | 1 |
| hsa-miR-5090 NM_152867 | MS4A1 | 1 |
| hsa-miR-4524 NM_152867 | MS4A1 | 1 |
| hsa-miR-5571 NM_152867 | MS4A1 | 1 |
| hsa-miR-664b NM_152867 | MS4A1 | 1 |
| hsa-miR-5692 NM_152867 | MS4A1 | 1 |
| hsa-miR-6124 NM_152867 | MS4A1 | 1 |
| hsa-miR-6126 NM_152867 | MS4A1 | 1 |
| hsa-miR-6127 NM_152867 | MS4A1 | 1 |
| hsa-miR-6131 NM_152867 | MS4A1 | 1 |
| hsa-miR-6504 NM_152867 | MS4A1 | 1 |
| hsa-miR-6511 NM_152867 | MS4A1 | 1 |
| hsa-miR-6514 NM_152867 | MS4A1 | 1 |
| hsa-miR-6717 NM_152867 | MS4A1 | 1 |
| hsa-miR-6718 NM_152867 | MS4A1 | 1 |
| hsa-miR-6727 NM_152867 | MS4A1 | 1 |
| hsa-miR-6730 NM_152867 | MS4A1 | 1 |
| hsa-miR-6730 NM_152867 | MS4A1 | 1 |
| hsa-miR-6733 NM_152867 | MS4A1 | 1 |
| hsa-miR-6745 NM_152867 | MS4A1 | 1 |
| hsa-miR-6745 NM_152867 | MS4A1 | 1 |
| hsa-miR-6745 NM_152867 | MS4A1 | 1 |
| hsa-miR-6746 NM_152867 | MS4A1 | 1 |
| hsa-miR-6748 NM_152867 | MS4A1 | 1 |
| hsa-miR-6749 NM_152867 | MS4A1 | 1 |
| hsa-miR-6751 NM_152867 | MS4A1 | 1 |
| hsa-miR-6753 NM_152867 | MS4A1 | 1 |
| hsa-miR-6757 NM_152867 | MS4A1 | 1 |
| hsa-miR-6758 NM_152867 | MS4A1 | 1 |
| hsa-miR-6767 NM_152867 | MS4A1 | 1 |
| hsa-miR-6770 NM_152867 | MS4A1 | 1 |
| hsa-miR-6772 NM_152867 | MS4A1 | 1 |
| hsa-miR-6779 NM_152867 | MS4A1 | 1 |
| hsa-miR-6789 NM_152867 | MS4A1 | 1 |
| hsa-miR-6791 NM_152867 | MS4A1 | 1 |
| hsa-miR-6792 NM_152867 | MS4A1 | 1 |
| hsa-miR-6794 NM_152867 | MS4A1 | 1 |
| hsa-miR-6804 NM_152867 | MS4A1 | 1 |
| hsa-miR-6806 NM_152867 | MS4A1 | 1 |
| hsa-miR-6807 NM_152867 | MS4A1 | 1 |
| hsa-miR-6809 NM_152867 | MS4A1 | 1 |
| hsa-miR-6813 NM_152867 | MS4A1 | 1 |
| hsa-miR-6814 NM_152867 | MS4A1 | 1 |
| hsa-miR-6815 NM_152867 | MS4A1 | 1 |
| hsa-miR-6816 NM_152867 | MS4A1 | 1 |
| hsa-miR-6820 NM_152867 | MS4A1 | 1 |
| hsa-miR-6821 NM_152867 | MS4A1 | 1 |
| hsa-miR-6822 NM_152867 | MS4A1 | 1 |
| hsa-miR-6823 NM_152867 | MS4A1 | 1 |
| hsa-miR-6823 NM_152867 | MS4A1 | 1 |
| hsa-miR-6826 NM_152867 | MS4A1 | 1 |
| hsa-miR-6832 NM_152867 | MS4A1 | 1 |
| hsa-miR-6833 NM_152867 | MS4A1 | 1 |
| hsa-miR-6834 NM_152867 | MS4A1 | 1 |
| hsa-miR-6780 NM_152867 | MS4A1 | 1 |

|               |           |       |   |
|---------------|-----------|-------|---|
| hsa-miR-6839  | NM_152867 | MS4A1 | 1 |
| hsa-miR-6843  | NM_152867 | MS4A1 | 1 |
| hsa-miR-6845  | NM_152867 | MS4A1 | 1 |
| hsa-miR-6847  | NM_152867 | MS4A1 | 1 |
| hsa-miR-6856  | NM_152867 | MS4A1 | 1 |
| hsa-miR-6866  | NM_152867 | MS4A1 | 1 |
| hsa-miR-6869  | NM_152867 | MS4A1 | 1 |
| hsa-miR-6871  | NM_152867 | MS4A1 | 1 |
| hsa-miR-6871  | NM_152867 | MS4A1 | 1 |
| hsa-miR-6873  | NM_152867 | MS4A1 | 1 |
| hsa-miR-6875  | NM_152867 | MS4A1 | 1 |
| hsa-miR-6878  | NM_152867 | MS4A1 | 1 |
| hsa-miR-6886  | NM_152867 | MS4A1 | 1 |
| hsa-miR-6889  | NM_152867 | MS4A1 | 1 |
| hsa-miR-6892  | NM_152867 | MS4A1 | 1 |
| hsa-miR-6893  | NM_152867 | MS4A1 | 1 |
| hsa-miR-7107  | NM_152867 | MS4A1 | 1 |
| hsa-miR-7158  | NM_152867 | MS4A1 | 1 |
| hsa-miR-7704  | NM_152867 | MS4A1 | 1 |
| hsa-miR-7705  | NM_152867 | MS4A1 | 1 |
| hsa-miR-7974  | NM_152867 | MS4A1 | 1 |
| hsa-miR-806C  | NM_152867 | MS4A1 | 1 |
| hsa-miR-806S  | NM_152867 | MS4A1 | 1 |
| hsa-miR-8071  | NM_152867 | MS4A1 | 1 |
| hsa-miR-8073  | NM_152867 | MS4A1 | 1 |
| hsa-miR-8078  | NM_152867 | MS4A1 | 1 |
| hsa-miR-1039  | NM_152867 | MS4A1 | 1 |
| hsa-miR-1039  | NM_152867 | MS4A1 | 1 |
| hsa-miR-104C  | NM_152867 | MS4A1 | 1 |
| hsa-miR-104C  | NM_152867 | MS4A1 | 1 |
| hsa-miR-1118  | NM_152867 | MS4A1 | 1 |
| hsa-miR-1211  | NM_152867 | MS4A1 | 1 |
| hsa-miR-1211  | NM_152867 | MS4A1 | 1 |
| hsa-miR-1212  | NM_152867 | MS4A1 | 1 |
| hsa-miR-17-3j | NM_021950 | MS4A1 | 1 |
| hsa-miR-25-5j | NM_021950 | MS4A1 | 1 |
| hsa-miR-27a-  | NM_021950 | MS4A1 | 1 |
| hsa-miR-92a-  | NM_021950 | MS4A1 | 1 |
| hsa-miR-29b-  | NM_021950 | MS4A1 | 1 |
| hsa-miR-197-  | NM_021950 | MS4A1 | 1 |
| hsa-miR-10a-  | NM_021950 | MS4A1 | 1 |
| hsa-miR-34a-  | NM_021950 | MS4A1 | 1 |
| hsa-miR-187-  | NM_021950 | MS4A1 | 1 |
| hsa-miR-214-  | NM_021950 | MS4A1 | 1 |
| hsa-miR-214-  | NM_021950 | MS4A1 | 1 |
| hsa-miR-216a  | NM_021950 | MS4A1 | 1 |
| hsa-miR-221-  | NM_021950 | MS4A1 | 1 |
| hsa-miR-224-  | NM_021950 | MS4A1 | 1 |
| hsa-miR-140-  | NM_021950 | MS4A1 | 1 |
| hsa-miR-143-  | NM_021950 | MS4A1 | 1 |
| hsa-miR-149-  | NM_021950 | MS4A1 | 1 |
| hsa-miR-186-  | NM_021950 | MS4A1 | 1 |
| hsa-miR-361-  | NM_021950 | MS4A1 | 1 |
| hsa-miR-330-  | NM_021950 | MS4A1 | 1 |
| hsa-miR-148t  | NM_021950 | MS4A1 | 1 |
| hsa-miR-423-  | NM_021950 | MS4A1 | 1 |
| hsa-miR-423-  | NM_021950 | MS4A1 | 1 |
| hsa-miR-425-  | NM_021950 | MS4A1 | 1 |
| hsa-miR-409-  | NM_021950 | MS4A1 | 1 |
| hsa-miR-410-  | NM_021950 | MS4A1 | 1 |
| hsa-miR-483-  | NM_021950 | MS4A1 | 1 |
| hsa-miR-484   | NM_021950 | MS4A1 | 1 |
| hsa-miR-486-  | NM_021950 | MS4A1 | 1 |
| hsa-miR-146t  | NM_021950 | MS4A1 | 1 |
| hsa-miR-146t  | NM_021950 | MS4A1 | 1 |
| hsa-miR-525-  | NM_021950 | MS4A1 | 1 |
| hsa-miR-505-  | NM_021950 | MS4A1 | 1 |
| hsa-miR-505-  | NM_021950 | MS4A1 | 1 |
| hsa-miR-509-  | NM_021950 | MS4A1 | 1 |
| hsa-miR-510-  | NM_021950 | MS4A1 | 1 |
| hsa-miR-487t  | NM_021950 | MS4A1 | 1 |
| hsa-miR-557   | NM_021950 | MS4A1 | 1 |
| hsa-miR-564   | NM_021950 | MS4A1 | 1 |
| hsa-miR-579-  | NM_021950 | MS4A1 | 1 |
| hsa-miR-550a  | NM_021950 | MS4A1 | 1 |
| hsa-miR-614   | NM_021950 | MS4A1 | 1 |
| hsa-miR-622   | NM_021950 | MS4A1 | 1 |
| hsa-miR-632   | NM_021950 | MS4A1 | 1 |
| hsa-miR-639   | NM_021950 | MS4A1 | 1 |
| hsa-miR-644a  | NM_021950 | MS4A1 | 1 |
| hsa-miR-650   | NM_021950 | MS4A1 | 1 |
| hsa-miR-657   | NM_021950 | MS4A1 | 1 |
| hsa-miR-758-  | NM_021950 | MS4A1 | 1 |
| hsa-miR-671-  | NM_021950 | MS4A1 | 1 |
| hsa-miR-668-  | NM_021950 | MS4A1 | 1 |
| hsa-miR-1271  | NM_021950 | MS4A1 | 1 |
| hsa-miR-1301  | NM_021950 | MS4A1 | 1 |
| hsa-miR-759   | NM_021950 | MS4A1 | 1 |
| hsa-miR-765   | NM_021950 | MS4A1 | 1 |
| hsa-miR-541-  | NM_021950 | MS4A1 | 1 |
| hsa-miR-147t  | NM_021950 | MS4A1 | 1 |
| hsa-miR-877-  | NM_021950 | MS4A1 | 1 |
| hsa-miR-922   | NM_021950 | MS4A1 | 1 |
| hsa-miR-942-  | NM_021950 | MS4A1 | 1 |



|                        |       |   |
|------------------------|-------|---|
| hsa-miR-1182 NM_021950 | MS4A1 | 1 |
| hsa-miR-1183 NM_021950 | MS4A1 | 1 |
| hsa-miR-1226 NM_021950 | MS4A1 | 1 |
| hsa-miR-1227 NM_021950 | MS4A1 | 1 |
| hsa-miR-1234 NM_021950 | MS4A1 | 1 |
| hsa-miR-1247 NM_021950 | MS4A1 | 1 |
| hsa-miR-1256 NM_021950 | MS4A1 | 1 |
| hsa-miR-1257 NM_021950 | MS4A1 | 1 |
| hsa-miR-1266 NM_021950 | MS4A1 | 1 |
| hsa-miR-1307 NM_021950 | MS4A1 | 1 |
| hsa-miR-103b NM_021950 | MS4A1 | 1 |
| hsa-miR-1909 NM_021950 | MS4A1 | 1 |
| hsa-miR-1912 NM_021950 | MS4A1 | 1 |
| hsa-miR-1915 NM_021950 | MS4A1 | 1 |
| hsa-miR-211c NM_021950 | MS4A1 | 1 |
| hsa-miR-2278 NM_021950 | MS4A1 | 1 |
| hsa-miR-3126 NM_021950 | MS4A1 | 1 |
| hsa-miR-3132 NM_021950 | MS4A1 | 1 |
| hsa-miR-544b NM_021950 | MS4A1 | 1 |
| hsa-miR-1273 NM_021950 | MS4A1 | 1 |
| hsa-miR-3151 NM_021950 | MS4A1 | 1 |
| hsa-miR-3074 NM_021950 | MS4A1 | 1 |
| hsa-miR-3074 NM_021950 | MS4A1 | 1 |
| hsa-miR-3156 NM_021950 | MS4A1 | 1 |
| hsa-miR-3158 NM_021950 | MS4A1 | 1 |
| hsa-miR-3165 NM_021950 | MS4A1 | 1 |
| hsa-miR-3176 NM_021950 | MS4A1 | 1 |
| hsa-miR-3192 NM_021950 | MS4A1 | 1 |
| hsa-miR-3193 NM_021950 | MS4A1 | 1 |
| hsa-miR-3194 NM_021950 | MS4A1 | 1 |
| hsa-miR-3196 NM_021950 | MS4A1 | 1 |
| hsa-miR-3198 NM_021950 | MS4A1 | 1 |
| hsa-miR-4312 NM_021950 | MS4A1 | 1 |
| hsa-miR-4258 NM_021950 | MS4A1 | 1 |
| hsa-miR-4269 NM_021950 | MS4A1 | 1 |
| hsa-miR-3622 NM_021950 | MS4A1 | 1 |
| hsa-miR-3654 NM_021950 | MS4A1 | 1 |
| hsa-miR-3663 NM_021950 | MS4A1 | 1 |
| hsa-miR-3664 NM_021950 | MS4A1 | 1 |
| hsa-miR-3666 NM_021950 | MS4A1 | 1 |
| hsa-miR-368c NM_021950 | MS4A1 | 1 |
| hsa-miR-3683 NM_021950 | MS4A1 | 1 |
| hsa-miR-3689 NM_021950 | MS4A1 | 1 |
| hsa-miR-3689 NM_021950 | MS4A1 | 1 |
| hsa-miR-3917 NM_021950 | MS4A1 | 1 |
| hsa-miR-3918 NM_021950 | MS4A1 | 1 |
| hsa-miR-3921 NM_021950 | MS4A1 | 1 |
| hsa-miR-442c NM_021950 | MS4A1 | 1 |
| hsa-miR-4421 NM_021950 | MS4A1 | 1 |
| hsa-miR-4433 NM_021950 | MS4A1 | 1 |
| hsa-miR-4439 NM_021950 | MS4A1 | 1 |
| hsa-miR-3135 NM_021950 | MS4A1 | 1 |
| hsa-miR-3689 NM_021950 | MS4A1 | 1 |
| hsa-miR-4483 NM_021950 | MS4A1 | 1 |
| hsa-miR-4489 NM_021950 | MS4A1 | 1 |
| hsa-miR-2392 NM_021950 | MS4A1 | 1 |
| hsa-miR-451c NM_021950 | MS4A1 | 1 |
| hsa-miR-4522 NM_021950 | MS4A1 | 1 |
| hsa-miR-4524 NM_021950 | MS4A1 | 1 |
| hsa-miR-4525 NM_021950 | MS4A1 | 1 |
| hsa-miR-464c NM_021950 | MS4A1 | 1 |
| hsa-miR-4644 NM_021950 | MS4A1 | 1 |
| hsa-miR-4647 NM_021950 | MS4A1 | 1 |
| hsa-miR-465c NM_021950 | MS4A1 | 1 |
| hsa-miR-4650 NM_021950 | MS4A1 | 1 |
| hsa-miR-4653 NM_021950 | MS4A1 | 1 |
| hsa-miR-4658 NM_021950 | MS4A1 | 1 |
| hsa-miR-4661 NM_021950 | MS4A1 | 1 |
| hsa-miR-4675 NM_021950 | MS4A1 | 1 |
| hsa-miR-4677 NM_021950 | MS4A1 | 1 |
| hsa-miR-468c NM_021950 | MS4A1 | 1 |
| hsa-miR-4685 NM_021950 | MS4A1 | 1 |
| hsa-miR-4689 NM_021950 | MS4A1 | 1 |
| hsa-miR-470c NM_021950 | MS4A1 | 1 |
| hsa-miR-470c NM_021950 | MS4A1 | 1 |
| hsa-miR-4715 NM_021950 | MS4A1 | 1 |
| hsa-miR-4716 NM_021950 | MS4A1 | 1 |
| hsa-miR-472c NM_021950 | MS4A1 | 1 |
| hsa-miR-4722 NM_021950 | MS4A1 | 1 |
| hsa-miR-4723 NM_021950 | MS4A1 | 1 |
| hsa-miR-4726 NM_021950 | MS4A1 | 1 |
| hsa-miR-3064 NM_021950 | MS4A1 | 1 |
| hsa-miR-4738 NM_021950 | MS4A1 | 1 |
| hsa-miR-4739 NM_021950 | MS4A1 | 1 |
| hsa-miR-4743 NM_021950 | MS4A1 | 1 |
| hsa-miR-4747 NM_021950 | MS4A1 | 1 |
| hsa-miR-4747 NM_021950 | MS4A1 | 1 |
| hsa-miR-4748 NM_021950 | MS4A1 | 1 |
| hsa-miR-4752 NM_021950 | MS4A1 | 1 |
| hsa-miR-4754 NM_021950 | MS4A1 | 1 |
| hsa-miR-4769 NM_021950 | MS4A1 | 1 |
| hsa-miR-4781 NM_021950 | MS4A1 | 1 |
| hsa-miR-4781 NM_021950 | MS4A1 | 1 |
| hsa-miR-4783 NM_021950 | MS4A1 | 1 |

|                        |       |   |
|------------------------|-------|---|
| hsa-miR-5007 NM_021950 | MS4A1 | 1 |
| hsa-miR-509C NM_021950 | MS4A1 | 1 |
| hsa-miR-664t NM_021950 | MS4A1 | 1 |
| hsa-miR-5694 NM_021950 | MS4A1 | 1 |
| hsa-miR-6074 NM_021950 | MS4A1 | 1 |
| hsa-miR-6124 NM_021950 | MS4A1 | 1 |
| hsa-miR-6126 NM_021950 | MS4A1 | 1 |
| hsa-miR-6127 NM_021950 | MS4A1 | 1 |
| hsa-miR-6131 NM_021950 | MS4A1 | 1 |
| hsa-miR-6131 NM_021950 | MS4A1 | 1 |
| hsa-miR-6133 NM_021950 | MS4A1 | 1 |
| hsa-miR-6504 NM_021950 | MS4A1 | 1 |
| hsa-miR-6506 NM_021950 | MS4A1 | 1 |
| hsa-miR-6511 NM_021950 | MS4A1 | 1 |
| hsa-miR-6514 NM_021950 | MS4A1 | 1 |
| hsa-miR-6715 NM_021950 | MS4A1 | 1 |
| hsa-miR-6717 NM_021950 | MS4A1 | 1 |
| hsa-miR-6718 NM_021950 | MS4A1 | 1 |
| hsa-miR-6727 NM_021950 | MS4A1 | 1 |
| hsa-miR-673C NM_021950 | MS4A1 | 1 |
| hsa-miR-673C NM_021950 | MS4A1 | 1 |
| hsa-miR-6733 NM_021950 | MS4A1 | 1 |
| hsa-miR-6748 NM_021950 | MS4A1 | 1 |
| hsa-miR-6748 NM_021950 | MS4A1 | 1 |
| hsa-miR-6749 NM_021950 | MS4A1 | 1 |
| hsa-miR-6755 NM_021950 | MS4A1 | 1 |
| hsa-miR-6758 NM_021950 | MS4A1 | 1 |
| hsa-miR-6759 NM_021950 | MS4A1 | 1 |
| hsa-miR-6761 NM_021950 | MS4A1 | 1 |
| hsa-miR-6762 NM_021950 | MS4A1 | 1 |
| hsa-miR-6764 NM_021950 | MS4A1 | 1 |
| hsa-miR-6767 NM_021950 | MS4A1 | 1 |
| hsa-miR-677C NM_021950 | MS4A1 | 1 |
| hsa-miR-6772 NM_021950 | MS4A1 | 1 |
| hsa-miR-6773 NM_021950 | MS4A1 | 1 |
| hsa-miR-6777 NM_021950 | MS4A1 | 1 |
| hsa-miR-6779 NM_021950 | MS4A1 | 1 |
| hsa-miR-6779 NM_021950 | MS4A1 | 1 |
| hsa-miR-6781 NM_021950 | MS4A1 | 1 |
| hsa-miR-6789 NM_021950 | MS4A1 | 1 |
| hsa-miR-6792 NM_021950 | MS4A1 | 1 |
| hsa-miR-6794 NM_021950 | MS4A1 | 1 |
| hsa-miR-6803 NM_021950 | MS4A1 | 1 |
| hsa-miR-6804 NM_021950 | MS4A1 | 1 |
| hsa-miR-6806 NM_021950 | MS4A1 | 1 |
| hsa-miR-6806 NM_021950 | MS4A1 | 1 |
| hsa-miR-6807 NM_021950 | MS4A1 | 1 |
| hsa-miR-6807 NM_021950 | MS4A1 | 1 |
| hsa-miR-6813 NM_021950 | MS4A1 | 1 |
| hsa-miR-6814 NM_021950 | MS4A1 | 1 |
| hsa-miR-6815 NM_021950 | MS4A1 | 1 |
| hsa-miR-6816 NM_021950 | MS4A1 | 1 |
| hsa-miR-6818 NM_021950 | MS4A1 | 1 |
| hsa-miR-6819 NM_021950 | MS4A1 | 1 |
| hsa-miR-6820 NM_021950 | MS4A1 | 1 |
| hsa-miR-6821 NM_021950 | MS4A1 | 1 |
| hsa-miR-6823 NM_021950 | MS4A1 | 1 |
| hsa-miR-6823 NM_021950 | MS4A1 | 1 |
| hsa-miR-6832 NM_021950 | MS4A1 | 1 |
| hsa-miR-6835 NM_021950 | MS4A1 | 1 |
| hsa-miR-678C NM_021950 | MS4A1 | 1 |
| hsa-miR-6839 NM_021950 | MS4A1 | 1 |
| hsa-miR-6842 NM_021950 | MS4A1 | 1 |
| hsa-miR-6842 NM_021950 | MS4A1 | 1 |
| hsa-miR-6843 NM_021950 | MS4A1 | 1 |
| hsa-miR-6845 NM_021950 | MS4A1 | 1 |
| hsa-miR-6847 NM_021950 | MS4A1 | 1 |
| hsa-miR-6854 NM_021950 | MS4A1 | 1 |
| hsa-miR-6856 NM_021950 | MS4A1 | 1 |
| hsa-miR-6769 NM_021950 | MS4A1 | 1 |
| hsa-miR-6866 NM_021950 | MS4A1 | 1 |
| hsa-miR-6867 NM_021950 | MS4A1 | 1 |
| hsa-miR-6869 NM_021950 | MS4A1 | 1 |
| hsa-miR-6871 NM_021950 | MS4A1 | 1 |
| hsa-miR-6871 NM_021950 | MS4A1 | 1 |
| hsa-miR-6873 NM_021950 | MS4A1 | 1 |
| hsa-miR-6889 NM_021950 | MS4A1 | 1 |
| hsa-miR-6892 NM_021950 | MS4A1 | 1 |
| hsa-miR-6892 NM_021950 | MS4A1 | 1 |
| hsa-miR-6893 NM_021950 | MS4A1 | 1 |
| hsa-miR-7107 NM_021950 | MS4A1 | 1 |
| hsa-miR-7107 NM_021950 | MS4A1 | 1 |
| hsa-miR-711C NM_021950 | MS4A1 | 1 |
| hsa-miR-7151 NM_021950 | MS4A1 | 1 |
| hsa-miR-7158 NM_021950 | MS4A1 | 1 |
| hsa-miR-7704 NM_021950 | MS4A1 | 1 |
| hsa-miR-7705 NM_021950 | MS4A1 | 1 |
| hsa-miR-7974 NM_021950 | MS4A1 | 1 |
| hsa-miR-8052 NM_021950 | MS4A1 | 1 |
| hsa-miR-8071 NM_021950 | MS4A1 | 1 |
| hsa-miR-8078 NM_021950 | MS4A1 | 1 |
| hsa-miR-1039 NM_021950 | MS4A1 | 1 |
| hsa-miR-104C NM_021950 | MS4A1 | 1 |
| hsa-miR-104C NM_021950 | MS4A1 | 1 |

|               |           |       |            |
|---------------|-----------|-------|------------|
| hsa-miR-1035  | NM_021950 | MS4A1 | 1          |
| hsa-miR-1118  | NM_021950 | MS4A1 | 1          |
| hsa-miR-3085  | NM_021950 | MS4A1 | 1          |
| hsa-miR-1211  | NM_021950 | MS4A1 | 1          |
| hsa-miR-1212  | NM_021950 | MS4A1 | 1          |
| hsa-miR-1213  | NM_021950 | MS4A1 | 1          |
| hsa-miR-4433  | NM_025184 | EFHC2 | 0.95       |
| hsa-miR-4632  | NM_025184 | EFHC2 | 0.95384615 |
| hsa-miR-7155  | NM_025184 | EFHC2 | 0.95384615 |
| hsa-miR-4455  | NM_025184 | EFHC2 | 0.96923077 |
| hsa-miR-7110  | NM_025184 | EFHC2 | 0.96923077 |
| hsa-miR-3178  | NM_025184 | EFHC2 | 0.98076923 |
| hsa-miR-6741  | NM_025184 | EFHC2 | 0.98076923 |
| hsa-miR-6785  | NM_025184 | EFHC2 | 0.98076923 |
| hsa-miR-6883  | NM_025184 | EFHC2 | 0.98076923 |
| hsa-miR-122-  | NM_025184 | EFHC2 | 1          |
| hsa-miR-152-  | NM_025184 | EFHC2 | 1          |
| hsa-miR-370-  | NM_025184 | EFHC2 | 1          |
| hsa-miR-202-  | NM_025184 | EFHC2 | 1          |
| hsa-miR-520f  | NM_025184 | EFHC2 | 1          |
| hsa-miR-519c  | NM_025184 | EFHC2 | 1          |
| hsa-miR-519t  | NM_025184 | EFHC2 | 1          |
| hsa-miR-523-  | NM_025184 | EFHC2 | 1          |
| hsa-miR-520t  | NM_025184 | EFHC2 | 1          |
| hsa-miR-518e  | NM_025184 | EFHC2 | 1          |
| hsa-miR-522-  | NM_025184 | EFHC2 | 1          |
| hsa-miR-519a  | NM_025184 | EFHC2 | 1          |
| hsa-miR-519a  | NM_025184 | EFHC2 | 1          |
| hsa-miR-509-  | NM_025184 | EFHC2 | 1          |
| hsa-miR-514a  | NM_025184 | EFHC2 | 1          |
| hsa-miR-548a  | NM_025184 | EFHC2 | 1          |
| hsa-miR-33b-  | NM_025184 | EFHC2 | 1          |
| hsa-miR-645   | NM_025184 | EFHC2 | 1          |
| hsa-miR-769-  | NM_025184 | EFHC2 | 1          |
| hsa-miR-450t  | NM_025184 | EFHC2 | 1          |
| hsa-miR-760   | NM_025184 | EFHC2 | 1          |
| hsa-miR-118C  | NM_025184 | EFHC2 | 1          |
| hsa-miR-1236  | NM_025184 | EFHC2 | 1          |
| hsa-miR-1238  | NM_025184 | EFHC2 | 1          |
| hsa-miR-3145  | NM_025184 | EFHC2 | 1          |
| hsa-miR-3170  | NM_025184 | EFHC2 | 1          |
| hsa-miR-4302  | NM_025184 | EFHC2 | 1          |
| hsa-miR-3924  | NM_025184 | EFHC2 | 1          |
| hsa-miR-3936  | NM_025184 | EFHC2 | 1          |
| hsa-miR-394C  | NM_025184 | EFHC2 | 1          |
| hsa-miR-4425  | NM_025184 | EFHC2 | 1          |
| hsa-miR-4447  | NM_025184 | EFHC2 | 1          |
| hsa-miR-4465  | NM_025184 | EFHC2 | 1          |
| hsa-miR-4472  | NM_025184 | EFHC2 | 1          |
| hsa-miR-4487  | NM_025184 | EFHC2 | 1          |
| hsa-miR-4485  | NM_025184 | EFHC2 | 1          |
| hsa-miR-4537  | NM_025184 | EFHC2 | 1          |
| hsa-miR-4716  | NM_025184 | EFHC2 | 1          |
| hsa-miR-4796  | NM_025184 | EFHC2 | 1          |
| hsa-miR-4802  | NM_025184 | EFHC2 | 1          |
| hsa-miR-5586  | NM_025184 | EFHC2 | 1          |
| hsa-miR-5591  | NM_025184 | EFHC2 | 1          |
| hsa-miR-5698  | NM_025184 | EFHC2 | 1          |
| hsa-miR-5787  | NM_025184 | EFHC2 | 1          |
| hsa-miR-6083  | NM_025184 | EFHC2 | 1          |
| hsa-miR-6088  | NM_025184 | EFHC2 | 1          |
| hsa-miR-6503  | NM_025184 | EFHC2 | 1          |
| hsa-miR-6505  | NM_025184 | EFHC2 | 1          |
| hsa-miR-6717  | NM_025184 | EFHC2 | 1          |
| hsa-miR-6717  | NM_025184 | EFHC2 | 1          |
| hsa-miR-6736  | NM_025184 | EFHC2 | 1          |
| hsa-miR-6737  | NM_025184 | EFHC2 | 1          |
| hsa-miR-6738  | NM_025184 | EFHC2 | 1          |
| hsa-miR-6752  | NM_025184 | EFHC2 | 1          |
| hsa-miR-6786  | NM_025184 | EFHC2 | 1          |
| hsa-miR-6802  | NM_025184 | EFHC2 | 1          |
| hsa-miR-6803  | NM_025184 | EFHC2 | 1          |
| hsa-miR-6815  | NM_025184 | EFHC2 | 1          |
| hsa-miR-6832  | NM_025184 | EFHC2 | 1          |
| hsa-miR-6845  | NM_025184 | EFHC2 | 1          |
| hsa-miR-6853  | NM_025184 | EFHC2 | 1          |
| hsa-miR-6855  | NM_025184 | EFHC2 | 1          |
| hsa-miR-6867  | NM_025184 | EFHC2 | 1          |
| hsa-miR-9718  | NM_025184 | EFHC2 | 1          |
| hsa-miR-1035  | NM_025184 | EFHC2 | 1          |
| hsa-miR-3055  | NM_025184 | EFHC2 | 1          |
| hsa-miR-1211  | NM_025184 | EFHC2 | 1          |
| hsa-miR-6835  | NM_033049 | MUC13 | 0.95384615 |
| hsa-miR-6866  | NM_033049 | MUC13 | 0.9512821  |
| hsa-let-7i-3p | NM_033049 | MUC13 | 0.96153846 |
| hsa-miR-339-  | NM_033049 | MUC13 | 0.96153846 |
| hsa-miR-605-  | NM_033049 | MUC13 | 0.96153846 |
| hsa-miR-4794  | NM_033049 | MUC13 | 0.96153846 |
| hsa-let-7b-5p | NM_033049 | MUC13 | 0.97435897 |
| hsa-miR-6845  | NM_033049 | MUC13 | 0.97435897 |
| hsa-miR-6853  | NM_033049 | MUC13 | 0.97435897 |
| hsa-miR-578   | NM_033049 | MUC13 | 0.98076923 |
| hsa-miR-3187  | NM_033049 | MUC13 | 0.98076923 |
| hsa-miR-4711  | NM_033049 | MUC13 | 0.98076923 |

|                |           |       |            |
|----------------|-----------|-------|------------|
| hsa-miR-6133   | NM_033049 | MUC13 | 0.98076923 |
| hsa-miR-6870   | NM_033049 | MUC13 | 0.98076923 |
| hsa-let-7a-5p  | NM_033049 | MUC13 | 1          |
| hsa-let-7a-2-3 | NM_033049 | MUC13 | 1          |
| hsa-let-7b-3p  | NM_033049 | MUC13 | 1          |
| hsa-let-7d-5p  | NM_033049 | MUC13 | 1          |
| hsa-let-7e-3p  | NM_033049 | MUC13 | 1          |
| hsa-miR-92a-   | NM_033049 | MUC13 | 1          |
| hsa-miR-23b-   | NM_033049 | MUC13 | 1          |
| hsa-miR-137-   | NM_033049 | MUC13 | 1          |
| hsa-miR-140-   | NM_033049 | MUC13 | 1          |
| hsa-miR-185-   | NM_033049 | MUC13 | 1          |
| hsa-miR-34b-   | NM_033049 | MUC13 | 1          |
| hsa-miR-296-   | NM_033049 | MUC13 | 1          |
| hsa-miR-361-   | NM_033049 | MUC13 | 1          |
| hsa-miR-371a   | NM_033049 | MUC13 | 1          |
| hsa-miR-331-   | NM_033049 | MUC13 | 1          |
| hsa-miR-490-   | NM_033049 | MUC13 | 1          |
| hsa-miR-515-   | NM_033049 | MUC13 | 1          |
| hsa-miR-520t   | NM_033049 | MUC13 | 1          |
| hsa-miR-520b   | NM_033049 | MUC13 | 1          |
| hsa-miR-517a   | NM_033049 | MUC13 | 1          |
| hsa-miR-517b   | NM_033049 | MUC13 | 1          |
| hsa-miR-517c   | NM_033049 | MUC13 | 1          |
| hsa-miR-519a   | NM_033049 | MUC13 | 1          |
| hsa-miR-519a   | NM_033049 | MUC13 | 1          |
| hsa-miR-504-   | NM_033049 | MUC13 | 1          |
| hsa-miR-532-   | NM_033049 | MUC13 | 1          |
| hsa-miR-92b-   | NM_033049 | MUC13 | 1          |
| hsa-miR-564    | NM_033049 | MUC13 | 1          |
| hsa-miR-567    | NM_033049 | MUC13 | 1          |
| hsa-miR-593-   | NM_033049 | MUC13 | 1          |
| hsa-miR-598-   | NM_033049 | MUC13 | 1          |
| hsa-miR-618    | NM_033049 | MUC13 | 1          |
| hsa-miR-619-   | NM_033049 | MUC13 | 1          |
| hsa-miR-33b-   | NM_033049 | MUC13 | 1          |
| hsa-miR-639    | NM_033049 | MUC13 | 1          |
| hsa-miR-663a   | NM_033049 | MUC13 | 1          |
| hsa-miR-668-   | NM_033049 | MUC13 | 1          |
| hsa-miR-769-   | NM_033049 | MUC13 | 1          |
| hsa-miR-766-   | NM_033049 | MUC13 | 1          |
| hsa-miR-301b   | NM_033049 | MUC13 | 1          |
| hsa-miR-939-   | NM_033049 | MUC13 | 1          |
| hsa-miR-1226   | NM_033049 | MUC13 | 1          |
| hsa-miR-1912   | NM_033049 | MUC13 | 1          |
| hsa-miR-718    | NM_033049 | MUC13 | 1          |
| hsa-miR-3125   | NM_033049 | MUC13 | 1          |
| hsa-miR-3131   | NM_033049 | MUC13 | 1          |
| hsa-miR-3150   | NM_033049 | MUC13 | 1          |
| hsa-miR-3152   | NM_033049 | MUC13 | 1          |
| hsa-miR-323b   | NM_033049 | MUC13 | 1          |
| hsa-miR-3183   | NM_033049 | MUC13 | 1          |
| hsa-miR-4315   | NM_033049 | MUC13 | 1          |
| hsa-miR-4258   | NM_033049 | MUC13 | 1          |
| hsa-miR-3649   | NM_033049 | MUC13 | 1          |
| hsa-miR-3667   | NM_033049 | MUC13 | 1          |
| hsa-miR-3681   | NM_033049 | MUC13 | 1          |
| hsa-miR-3911   | NM_033049 | MUC13 | 1          |
| hsa-miR-3917   | NM_033049 | MUC13 | 1          |
| hsa-miR-3936   | NM_033049 | MUC13 | 1          |
| hsa-miR-550b   | NM_033049 | MUC13 | 1          |
| hsa-miR-4422   | NM_033049 | MUC13 | 1          |
| hsa-miR-4446   | NM_033049 | MUC13 | 1          |
| hsa-miR-4447   | NM_033049 | MUC13 | 1          |
| hsa-miR-4493   | NM_033049 | MUC13 | 1          |
| hsa-miR-4493   | NM_033049 | MUC13 | 1          |
| hsa-miR-2392   | NM_033049 | MUC13 | 1          |
| hsa-miR-4522   | NM_033049 | MUC13 | 1          |
| hsa-miR-4533   | NM_033049 | MUC13 | 1          |
| hsa-miR-4538   | NM_033049 | MUC13 | 1          |
| hsa-miR-4640   | NM_033049 | MUC13 | 1          |
| hsa-miR-4649   | NM_033049 | MUC13 | 1          |
| hsa-miR-4650   | NM_033049 | MUC13 | 1          |
| hsa-miR-4667   | NM_033049 | MUC13 | 1          |
| hsa-miR-4682   | NM_033049 | MUC13 | 1          |
| hsa-miR-4685   | NM_033049 | MUC13 | 1          |
| hsa-miR-4687   | NM_033049 | MUC13 | 1          |
| hsa-miR-4689   | NM_033049 | MUC13 | 1          |
| hsa-miR-4697   | NM_033049 | MUC13 | 1          |
| hsa-miR-4698   | NM_033049 | MUC13 | 1          |
| hsa-miR-4700   | NM_033049 | MUC13 | 1          |
| hsa-miR-4703   | NM_033049 | MUC13 | 1          |
| hsa-miR-4710   | NM_033049 | MUC13 | 1          |
| hsa-miR-4723   | NM_033049 | MUC13 | 1          |
| hsa-miR-4724   | NM_033049 | MUC13 | 1          |
| hsa-miR-4726   | NM_033049 | MUC13 | 1          |
| hsa-miR-4727   | NM_033049 | MUC13 | 1          |
| hsa-miR-4728   | NM_033049 | MUC13 | 1          |
| hsa-miR-4731   | NM_033049 | MUC13 | 1          |
| hsa-miR-4738   | NM_033049 | MUC13 | 1          |
| hsa-miR-4743   | NM_033049 | MUC13 | 1          |
| hsa-miR-4752   | NM_033049 | MUC13 | 1          |
| hsa-miR-4755   | NM_033049 | MUC13 | 1          |
| hsa-miR-4780   | NM_033049 | MUC13 | 1          |

|                        |       |            |
|------------------------|-------|------------|
| hsa-miR-479C NM_033049 | MUC13 | 1          |
| hsa-miR-4802 NM_033049 | MUC13 | 1          |
| hsa-miR-5002 NM_033049 | MUC13 | 1          |
| hsa-miR-5088 NM_033049 | MUC13 | 1          |
| hsa-miR-5089 NM_033049 | MUC13 | 1          |
| hsa-miR-519C NM_033049 | MUC13 | 1          |
| hsa-miR-5192 NM_033049 | MUC13 | 1          |
| hsa-miR-5581 NM_033049 | MUC13 | 1          |
| hsa-miR-1295 NM_033049 | MUC13 | 1          |
| hsa-miR-6508 NM_033049 | MUC13 | 1          |
| hsa-miR-6515 NM_033049 | MUC13 | 1          |
| hsa-miR-6716 NM_033049 | MUC13 | 1          |
| hsa-miR-6722 NM_033049 | MUC13 | 1          |
| hsa-miR-673C NM_033049 | MUC13 | 1          |
| hsa-miR-6736 NM_033049 | MUC13 | 1          |
| hsa-miR-6748 NM_033049 | MUC13 | 1          |
| hsa-miR-6759 NM_033049 | MUC13 | 1          |
| hsa-miR-676C NM_033049 | MUC13 | 1          |
| hsa-miR-6766 NM_033049 | MUC13 | 1          |
| hsa-miR-6769 NM_033049 | MUC13 | 1          |
| hsa-miR-6772 NM_033049 | MUC13 | 1          |
| hsa-miR-6774 NM_033049 | MUC13 | 1          |
| hsa-miR-678C NM_033049 | MUC13 | 1          |
| hsa-miR-6781 NM_033049 | MUC13 | 1          |
| hsa-miR-6786 NM_033049 | MUC13 | 1          |
| hsa-miR-6791 NM_033049 | MUC13 | 1          |
| hsa-miR-6791 NM_033049 | MUC13 | 1          |
| hsa-miR-6793 NM_033049 | MUC13 | 1          |
| hsa-miR-6795 NM_033049 | MUC13 | 1          |
| hsa-miR-6796 NM_033049 | MUC13 | 1          |
| hsa-miR-6798 NM_033049 | MUC13 | 1          |
| hsa-miR-6799 NM_033049 | MUC13 | 1          |
| hsa-miR-680C NM_033049 | MUC13 | 1          |
| hsa-miR-6802 NM_033049 | MUC13 | 1          |
| hsa-miR-6813 NM_033049 | MUC13 | 1          |
| hsa-miR-6814 NM_033049 | MUC13 | 1          |
| hsa-miR-6818 NM_033049 | MUC13 | 1          |
| hsa-miR-6819 NM_033049 | MUC13 | 1          |
| hsa-miR-6821 NM_033049 | MUC13 | 1          |
| hsa-miR-6822 NM_033049 | MUC13 | 1          |
| hsa-miR-6824 NM_033049 | MUC13 | 1          |
| hsa-miR-683C NM_033049 | MUC13 | 1          |
| hsa-miR-6835 NM_033049 | MUC13 | 1          |
| hsa-miR-6845 NM_033049 | MUC13 | 1          |
| hsa-miR-6845 NM_033049 | MUC13 | 1          |
| hsa-miR-6846 NM_033049 | MUC13 | 1          |
| hsa-miR-6846 NM_033049 | MUC13 | 1          |
| hsa-miR-686C NM_033049 | MUC13 | 1          |
| hsa-miR-6864 NM_033049 | MUC13 | 1          |
| hsa-miR-6868 NM_033049 | MUC13 | 1          |
| hsa-miR-6874 NM_033049 | MUC13 | 1          |
| hsa-miR-6878 NM_033049 | MUC13 | 1          |
| hsa-miR-6885 NM_033049 | MUC13 | 1          |
| hsa-miR-6885 NM_033049 | MUC13 | 1          |
| hsa-miR-6889 NM_033049 | MUC13 | 1          |
| hsa-miR-6894 NM_033049 | MUC13 | 1          |
| hsa-miR-7108 NM_033049 | MUC13 | 1          |
| hsa-miR-7151 NM_033049 | MUC13 | 1          |
| hsa-miR-7151 NM_033049 | MUC13 | 1          |
| hsa-miR-7161 NM_033049 | MUC13 | 1          |
| hsa-miR-7161 NM_033049 | MUC13 | 1          |
| hsa-miR-7843 NM_033049 | MUC13 | 1          |
| hsa-miR-9851 NM_033049 | MUC13 | 1          |
| hsa-miR-1213 NM_033049 | MUC13 | 1          |
| hsa-miR-4287 NM_053285 | TEKT1 | 0.95384615 |
| hsa-miR-3909 NM_053285 | TEKT1 | 0.95384615 |
| hsa-miR-4458 NM_053285 | TEKT1 | 0.95384615 |
| hsa-miR-4799 NM_053285 | TEKT1 | 0.95384615 |
| hsa-miR-3914 NM_053285 | TEKT1 | 0.95512821 |
| hsa-miR-4482 NM_053285 | TEKT1 | 0.95512821 |
| hsa-miR-181a NM_053285 | TEKT1 | 0.96153846 |
| hsa-miR-133a NM_053285 | TEKT1 | 0.96153846 |
| hsa-miR-299- NM_053285 | TEKT1 | 0.96153846 |
| hsa-miR-661 NM_053285  | TEKT1 | 0.96153846 |
| hsa-miR-758- NM_053285 | TEKT1 | 0.96153846 |
| hsa-miR-3678 NM_053285 | TEKT1 | 0.96153846 |
| hsa-miR-453C NM_053285 | TEKT1 | 0.96153846 |
| hsa-miR-4647 NM_053285 | TEKT1 | 0.96153846 |
| hsa-miR-6074 NM_053285 | TEKT1 | 0.96153846 |
| hsa-miR-6745 NM_053285 | TEKT1 | 0.96153846 |
| hsa-miR-6868 NM_053285 | TEKT1 | 0.96153846 |
| hsa-miR-6893 NM_053285 | TEKT1 | 0.96153846 |
| hsa-miR-1211 NM_053285 | TEKT1 | 0.96153846 |
| hsa-miR-600 NM_053285  | TEKT1 | 0.96923077 |
| hsa-miR-874- NM_053285 | TEKT1 | 0.96923077 |
| hsa-miR-513t NM_053285 | TEKT1 | 0.96923077 |
| hsa-miR-3175 NM_053285 | TEKT1 | 0.96923077 |
| hsa-miR-4489 NM_053285 | TEKT1 | 0.97435897 |
| hsa-miR-4492 NM_053285 | TEKT1 | 0.97435897 |
| hsa-miR-7114 NM_053285 | TEKT1 | 0.97435897 |
| hsa-miR-2114 NM_053285 | TEKT1 | 0.97435897 |
| hsa-miR-500t NM_053285 | TEKT1 | 0.97435897 |
| hsa-miR-4752 NM_053285 | TEKT1 | 0.97435897 |
| hsa-miR-7844 NM_053285 | TEKT1 | 0.97435897 |
| hsa-miR-486- NM_053285 | TEKT1 | 0.98076923 |

|                         |       |            |
|-------------------------|-------|------------|
| hsa-miR-541- NM_053285  | TEKT1 | 0.98076923 |
| hsa-miR-4315 NM_053285  | TEKT1 | 0.98076923 |
| hsa-miR-4667 NM_053285  | TEKT1 | 0.98076923 |
| hsa-miR-9851 NM_053285  | TEKT1 | 0.98076923 |
| hsa-miR-15a- NM_053285  | TEKT1 | 1          |
| hsa-miR-16-1- NM_053285 | TEKT1 | 1          |
| hsa-miR-18a- NM_053285  | TEKT1 | 1          |
| hsa-miR-19b- NM_053285  | TEKT1 | 1          |
| hsa-miR-24-1- NM_053285 | TEKT1 | 1          |
| hsa-miR-24-3j NM_053285 | TEKT1 | 1          |
| hsa-miR-24-3j NM_053285 | TEKT1 | 1          |
| hsa-miR-24-2- NM_053285 | TEKT1 | 1          |
| hsa-miR-25-5j NM_053285 | TEKT1 | 1          |
| hsa-miR-27a- NM_053285  | TEKT1 | 1          |
| hsa-miR-28-3j NM_053285 | TEKT1 | 1          |
| hsa-miR-93-3j NM_053285 | TEKT1 | 1          |
| hsa-miR-99a- NM_053285  | TEKT1 | 1          |
| hsa-miR-29b- NM_053285  | TEKT1 | 1          |
| hsa-miR-197- NM_053285  | TEKT1 | 1          |
| hsa-miR-197- NM_053285  | TEKT1 | 1          |
| hsa-miR-208a NM_053285  | TEKT1 | 1          |
| hsa-miR-129- NM_053285  | TEKT1 | 1          |
| hsa-miR-10a- NM_053285  | TEKT1 | 1          |
| hsa-miR-10a- NM_053285  | TEKT1 | 1          |
| hsa-miR-10b- NM_053285  | TEKT1 | 1          |
| hsa-miR-34a- NM_053285  | TEKT1 | 1          |
| hsa-miR-181a NM_053285  | TEKT1 | 1          |
| hsa-miR-187- NM_053285  | TEKT1 | 1          |
| hsa-miR-199b NM_053285  | TEKT1 | 1          |
| hsa-miR-210- NM_053285  | TEKT1 | 1          |
| hsa-miR-210- NM_053285  | TEKT1 | 1          |
| hsa-miR-212- NM_053285  | TEKT1 | 1          |
| hsa-miR-214- NM_053285  | TEKT1 | 1          |
| hsa-miR-219a NM_053285  | TEKT1 | 1          |
| hsa-miR-221- NM_053285  | TEKT1 | 1          |
| hsa-miR-221- NM_053285  | TEKT1 | 1          |
| hsa-miR-222- NM_053285  | TEKT1 | 1          |
| hsa-let-7g-3p NM_053285 | TEKT1 | 1          |
| hsa-miR-15b- NM_053285  | TEKT1 | 1          |
| hsa-miR-27b- NM_053285  | TEKT1 | 1          |
| hsa-miR-30b- NM_053285  | TEKT1 | 1          |
| hsa-miR-122- NM_053285  | TEKT1 | 1          |
| hsa-miR-125b NM_053285  | TEKT1 | 1          |
| hsa-miR-130a NM_053285  | TEKT1 | 1          |
| hsa-miR-143- NM_053285  | TEKT1 | 1          |
| hsa-miR-145- NM_053285  | TEKT1 | 1          |
| hsa-miR-152- NM_053285  | TEKT1 | 1          |
| hsa-miR-153- NM_053285  | TEKT1 | 1          |
| hsa-miR-127- NM_053285  | TEKT1 | 1          |
| hsa-miR-134- NM_053285  | TEKT1 | 1          |
| hsa-miR-149- NM_053285  | TEKT1 | 1          |
| hsa-miR-150- NM_053285  | TEKT1 | 1          |
| hsa-miR-150- NM_053285  | TEKT1 | 1          |
| hsa-miR-185- NM_053285  | TEKT1 | 1          |
| hsa-miR-185- NM_053285  | TEKT1 | 1          |
| hsa-miR-188- NM_053285  | TEKT1 | 1          |
| hsa-miR-188- NM_053285  | TEKT1 | 1          |
| hsa-miR-193a NM_053285  | TEKT1 | 1          |
| hsa-miR-193a NM_053285  | TEKT1 | 1          |
| hsa-miR-320a NM_053285  | TEKT1 | 1          |
| hsa-miR-128- NM_053285  | TEKT1 | 1          |
| hsa-miR-194- NM_053285  | TEKT1 | 1          |
| hsa-miR-106b NM_053285  | TEKT1 | 1          |
| hsa-miR-106b NM_053285  | TEKT1 | 1          |
| hsa-miR-106b NM_053285  | TEKT1 | 1          |
| hsa-miR-219a NM_053285  | TEKT1 | 1          |
| hsa-miR-219a NM_053285  | TEKT1 | 1          |
| hsa-miR-34c- NM_053285  | TEKT1 | 1          |
| hsa-miR-299- NM_053285  | TEKT1 | 1          |
| hsa-miR-301a NM_053285  | TEKT1 | 1          |
| hsa-miR-99b- NM_053285  | TEKT1 | 1          |
| hsa-miR-99b- NM_053285  | TEKT1 | 1          |
| hsa-miR-365a NM_053285  | TEKT1 | 1          |
| hsa-miR-365b NM_053285  | TEKT1 | 1          |
| hsa-miR-365b NM_053285  | TEKT1 | 1          |
| hsa-miR-370- NM_053285  | TEKT1 | 1          |
| hsa-miR-370- NM_053285  | TEKT1 | 1          |
| hsa-miR-370- NM_053285  | TEKT1 | 1          |
| hsa-miR-377- NM_053285  | TEKT1 | 1          |
| hsa-miR-381- NM_053285  | TEKT1 | 1          |
| hsa-miR-383- NM_053285  | TEKT1 | 1          |
| hsa-miR-330- NM_053285  | TEKT1 | 1          |
| hsa-miR-337- NM_053285  | TEKT1 | 1          |
| hsa-miR-323a NM_053285  | TEKT1 | 1          |
| hsa-miR-151a NM_053285  | TEKT1 | 1          |
| hsa-miR-151a NM_053285  | TEKT1 | 1          |
| hsa-miR-331- NM_053285  | TEKT1 | 1          |
| hsa-miR-324- NM_053285  | TEKT1 | 1          |
| hsa-miR-324- NM_053285  | TEKT1 | 1          |
| hsa-miR-339- NM_053285  | TEKT1 | 1          |
| hsa-miR-196b NM_053285  | TEKT1 | 1          |
| hsa-miR-18b- NM_053285  | TEKT1 | 1          |
| hsa-miR-18b- NM_053285  | TEKT1 | 1          |
| hsa-miR-449a NM_053285  | TEKT1 | 1          |

|              |            |       |   |
|--------------|------------|-------|---|
| hsa-miR-450a | NM_053285  | TEKT1 | 1 |
| hsa-miR-450a | NM_053285  | TEKT1 | 1 |
| hsa-miR-431  | -NM_053285 | TEKT1 | 1 |
| hsa-miR-431  | -NM_053285 | TEKT1 | 1 |
| hsa-miR-433  | -NM_053285 | TEKT1 | 1 |
| hsa-miR-412  | -NM_053285 | TEKT1 | 1 |
| hsa-miR-412  | -NM_053285 | TEKT1 | 1 |
| hsa-miR-486  | -NM_053285 | TEKT1 | 1 |
| hsa-miR-487a | NM_053285  | TEKT1 | 1 |
| hsa-miR-511  | -NM_053285 | TEKT1 | 1 |
| hsa-miR-493  | -NM_053285 | TEKT1 | 1 |
| hsa-miR-181d | NM_053285  | TEKT1 | 1 |
| hsa-miR-512  | -NM_053285 | TEKT1 | 1 |
| hsa-miR-498  | -NM_053285 | TEKT1 | 1 |
| hsa-miR-498  | -NM_053285 | TEKT1 | 1 |
| hsa-miR-520e | NM_053285  | TEKT1 | 1 |
| hsa-miR-519e | NM_053285  | TEKT1 | 1 |
| hsa-miR-525  | -NM_053285 | TEKT1 | 1 |
| hsa-miR-518c | NM_053285  | TEKT1 | 1 |
| hsa-miR-518d | NM_053285  | TEKT1 | 1 |
| hsa-miR-502  | -NM_053285 | TEKT1 | 1 |
| hsa-miR-503  | -NM_053285 | TEKT1 | 1 |
| hsa-miR-504  | -NM_053285 | TEKT1 | 1 |
| hsa-miR-505  | -NM_053285 | TEKT1 | 1 |
| hsa-miR-510  | -NM_053285 | TEKT1 | 1 |
| hsa-miR-532  | -NM_053285 | TEKT1 | 1 |
| hsa-miR-455  | -NM_053285 | TEKT1 | 1 |
| hsa-miR-539  | -NM_053285 | TEKT1 | 1 |
| hsa-miR-487b | NM_053285  | TEKT1 | 1 |
| hsa-miR-557  | NM_053285  | TEKT1 | 1 |
| hsa-miR-571  | NM_053285  | TEKT1 | 1 |
| hsa-miR-575  | NM_053285  | TEKT1 | 1 |
| hsa-miR-579  | -NM_053285 | TEKT1 | 1 |
| hsa-miR-584  | -NM_053285 | TEKT1 | 1 |
| hsa-miR-589  | -NM_053285 | TEKT1 | 1 |
| hsa-miR-593  | -NM_053285 | TEKT1 | 1 |
| hsa-miR-596  | NM_053285  | TEKT1 | 1 |
| hsa-miR-608  | NM_053285  | TEKT1 | 1 |
| hsa-miR-608  | NM_053285  | TEKT1 | 1 |
| hsa-miR-609  | NM_053285  | TEKT1 | 1 |
| hsa-miR-612  | NM_053285  | TEKT1 | 1 |
| hsa-miR-616  | -NM_053285 | TEKT1 | 1 |
| hsa-miR-623  | NM_053285  | TEKT1 | 1 |
| hsa-miR-630  | NM_053285  | TEKT1 | 1 |
| hsa-miR-637  | NM_053285  | TEKT1 | 1 |
| hsa-miR-638  | NM_053285  | TEKT1 | 1 |
| hsa-miR-647  | NM_053285  | TEKT1 | 1 |
| hsa-miR-650  | NM_053285  | TEKT1 | 1 |
| hsa-miR-651  | -NM_053285 | TEKT1 | 1 |
| hsa-miR-652  | -NM_053285 | TEKT1 | 1 |
| hsa-miR-662  | NM_053285  | TEKT1 | 1 |
| hsa-miR-662  | NM_053285  | TEKT1 | 1 |
| hsa-miR-449t | NM_053285  | TEKT1 | 1 |
| hsa-miR-654  | -NM_053285 | TEKT1 | 1 |
| hsa-miR-549a | NM_053285  | TEKT1 | 1 |
| hsa-miR-542  | -NM_053285 | TEKT1 | 1 |
| hsa-miR-668  | -NM_053285 | TEKT1 | 1 |
| hsa-miR-767  | -NM_053285 | TEKT1 | 1 |
| hsa-miR-1224 | NM_053285  | TEKT1 | 1 |
| hsa-miR-1224 | NM_053285  | TEKT1 | 1 |
| hsa-miR-320t | NM_053285  | TEKT1 | 1 |
| hsa-miR-320c | NM_053285  | TEKT1 | 1 |
| hsa-miR-1271 | NM_053285  | TEKT1 | 1 |
| hsa-miR-1301 | NM_053285  | TEKT1 | 1 |
| hsa-miR-449c | NM_053285  | TEKT1 | 1 |
| hsa-miR-449c | NM_053285  | TEKT1 | 1 |
| hsa-miR-769  | -NM_053285 | TEKT1 | 1 |
| hsa-miR-769  | -NM_053285 | TEKT1 | 1 |
| hsa-miR-766  | -NM_053285 | TEKT1 | 1 |
| hsa-miR-378d | NM_053285  | TEKT1 | 1 |
| hsa-miR-1298 | NM_053285  | TEKT1 | 1 |
| hsa-miR-1298 | NM_053285  | TEKT1 | 1 |
| hsa-miR-761  | NM_053285  | TEKT1 | 1 |
| hsa-miR-675  | -NM_053285 | TEKT1 | 1 |
| hsa-miR-298  | NM_053285  | TEKT1 | 1 |
| hsa-miR-891a | NM_053285  | TEKT1 | 1 |
| hsa-miR-891a | NM_053285  | TEKT1 | 1 |
| hsa-miR-889  | -NM_053285 | TEKT1 | 1 |
| hsa-miR-885  | -NM_053285 | TEKT1 | 1 |
| hsa-miR-877  | -NM_053285 | TEKT1 | 1 |
| hsa-miR-665  | NM_053285  | TEKT1 | 1 |
| hsa-miR-873  | -NM_053285 | TEKT1 | 1 |
| hsa-miR-873  | -NM_053285 | TEKT1 | 1 |
| hsa-miR-216t | NM_053285  | TEKT1 | 1 |
| hsa-miR-920  | NM_053285  | TEKT1 | 1 |
| hsa-miR-933  | NM_053285  | TEKT1 | 1 |
| hsa-miR-934  | NM_053285  | TEKT1 | 1 |
| hsa-miR-937  | -NM_053285 | TEKT1 | 1 |
| hsa-miR-937  | -NM_053285 | TEKT1 | 1 |
| hsa-miR-937  | -NM_053285 | TEKT1 | 1 |
| hsa-miR-939  | -NM_053285 | TEKT1 | 1 |
| hsa-miR-1178 | NM_053285  | TEKT1 | 1 |
| hsa-miR-1178 | NM_053285  | TEKT1 | 1 |
| hsa-miR-1182 | NM_053285  | TEKT1 | 1 |

|                        |       |   |
|------------------------|-------|---|
| hsa-miR-1225 NM_053285 | TEKT1 | 1 |
| hsa-miR-1225 NM_053285 | TEKT1 | 1 |
| hsa-miR-1228 NM_053285 | TEKT1 | 1 |
| hsa-miR-1228 NM_053285 | TEKT1 | 1 |
| hsa-miR-1233 NM_053285 | TEKT1 | 1 |
| hsa-miR-1236 NM_053285 | TEKT1 | 1 |
| hsa-miR-1200 NM_053285 | TEKT1 | 1 |
| hsa-miR-1202 NM_053285 | TEKT1 | 1 |
| hsa-miR-1205 NM_053285 | TEKT1 | 1 |
| hsa-miR-1207 NM_053285 | TEKT1 | 1 |
| hsa-miR-1207 NM_053285 | TEKT1 | 1 |
| hsa-miR-1285 NM_053285 | TEKT1 | 1 |
| hsa-miR-1286 NM_053285 | TEKT1 | 1 |
| hsa-miR-1290 NM_053285 | TEKT1 | 1 |
| hsa-miR-1293 NM_053285 | TEKT1 | 1 |
| hsa-miR-1294 NM_053285 | TEKT1 | 1 |
| hsa-miR-1302 NM_053285 | TEKT1 | 1 |
| hsa-miR-1303 NM_053285 | TEKT1 | 1 |
| hsa-miR-1304 NM_053285 | TEKT1 | 1 |
| hsa-miR-1304 NM_053285 | TEKT1 | 1 |
| hsa-miR-1243 NM_053285 | TEKT1 | 1 |
| hsa-miR-1249 NM_053285 | TEKT1 | 1 |
| hsa-miR-1250 NM_053285 | TEKT1 | 1 |
| hsa-miR-1251 NM_053285 | TEKT1 | 1 |
| hsa-miR-1260 NM_053285 | TEKT1 | 1 |
| hsa-miR-1266 NM_053285 | TEKT1 | 1 |
| hsa-miR-1270 NM_053285 | TEKT1 | 1 |
| hsa-miR-1306 NM_053285 | TEKT1 | 1 |
| hsa-miR-1465 NM_053285 | TEKT1 | 1 |
| hsa-miR-103b NM_053285 | TEKT1 | 1 |
| hsa-miR-320c NM_053285 | TEKT1 | 1 |
| hsa-miR-1908 NM_053285 | TEKT1 | 1 |
| hsa-miR-1910 NM_053285 | TEKT1 | 1 |
| hsa-miR-1910 NM_053285 | TEKT1 | 1 |
| hsa-miR-1911 NM_053285 | TEKT1 | 1 |
| hsa-miR-1911 NM_053285 | TEKT1 | 1 |
| hsa-miR-1914 NM_053285 | TEKT1 | 1 |
| hsa-miR-1914 NM_053285 | TEKT1 | 1 |
| hsa-miR-1915 NM_053285 | TEKT1 | 1 |
| hsa-miR-2110 NM_053285 | TEKT1 | 1 |
| hsa-miR-2117 NM_053285 | TEKT1 | 1 |
| hsa-miR-2276 NM_053285 | TEKT1 | 1 |
| hsa-miR-2278 NM_053285 | TEKT1 | 1 |
| hsa-miR-711 NM_053285  | TEKT1 | 1 |
| hsa-miR-3115 NM_053285 | TEKT1 | 1 |
| hsa-miR-3126 NM_053285 | TEKT1 | 1 |
| hsa-miR-3126 NM_053285 | TEKT1 | 1 |
| hsa-miR-3132 NM_053285 | TEKT1 | 1 |
| hsa-miR-544b NM_053285 | TEKT1 | 1 |
| hsa-miR-3138 NM_053285 | TEKT1 | 1 |
| hsa-miR-3144 NM_053285 | TEKT1 | 1 |
| hsa-miR-1273 NM_053285 | TEKT1 | 1 |
| hsa-miR-3147 NM_053285 | TEKT1 | 1 |
| hsa-miR-3150 NM_053285 | TEKT1 | 1 |
| hsa-miR-3151 NM_053285 | TEKT1 | 1 |
| hsa-miR-3151 NM_053285 | TEKT1 | 1 |
| hsa-miR-3151 NM_053285 | TEKT1 | 1 |
| hsa-miR-3153 NM_053285 | TEKT1 | 1 |
| hsa-miR-3074 NM_053285 | TEKT1 | 1 |
| hsa-miR-3157 NM_053285 | TEKT1 | 1 |
| hsa-miR-3158 NM_053285 | TEKT1 | 1 |
| hsa-miR-3158 NM_053285 | TEKT1 | 1 |
| hsa-miR-1260 NM_053285 | TEKT1 | 1 |
| hsa-miR-3173 NM_053285 | TEKT1 | 1 |
| hsa-miR-3173 NM_053285 | TEKT1 | 1 |
| hsa-miR-3175 NM_053285 | TEKT1 | 1 |
| hsa-miR-3177 NM_053285 | TEKT1 | 1 |
| hsa-miR-3179 NM_053285 | TEKT1 | 1 |
| hsa-miR-3180 NM_053285 | TEKT1 | 1 |
| hsa-miR-3184 NM_053285 | TEKT1 | 1 |
| hsa-miR-3065 NM_053285 | TEKT1 | 1 |
| hsa-miR-3187 NM_053285 | TEKT1 | 1 |
| hsa-miR-3190 NM_053285 | TEKT1 | 1 |
| hsa-miR-3190 NM_053285 | TEKT1 | 1 |
| hsa-miR-3190 NM_053285 | TEKT1 | 1 |
| hsa-miR-3192 NM_053285 | TEKT1 | 1 |
| hsa-miR-3192 NM_053285 | TEKT1 | 1 |
| hsa-miR-3193 NM_053285 | TEKT1 | 1 |
| hsa-miR-3195 NM_053285 | TEKT1 | 1 |
| hsa-miR-3198 NM_053285 | TEKT1 | 1 |
| hsa-miR-3198 NM_053285 | TEKT1 | 1 |
| hsa-miR-3198 NM_053285 | TEKT1 | 1 |
| hsa-miR-3195 NM_053285 | TEKT1 | 1 |
| hsa-miR-4296 NM_053285 | TEKT1 | 1 |
| hsa-miR-378c NM_053285 | TEKT1 | 1 |
| hsa-miR-4293 NM_053285 | TEKT1 | 1 |
| hsa-miR-4294 NM_053285 | TEKT1 | 1 |
| hsa-miR-4298 NM_053285 | TEKT1 | 1 |
| hsa-miR-4304 NM_053285 | TEKT1 | 1 |
| hsa-miR-4302 NM_053285 | TEKT1 | 1 |
| hsa-miR-4315 NM_053285 | TEKT1 | 1 |
| hsa-miR-4322 NM_053285 | TEKT1 | 1 |
| hsa-miR-4322 NM_053285 | TEKT1 | 1 |
| hsa-miR-4321 NM_053285 | TEKT1 | 1 |



|                        |       |   |
|------------------------|-------|---|
| hsa-miR-4259 NM_053285 | TEKT1 | 1 |
| hsa-miR-4260 NM_053285 | TEKT1 | 1 |
| hsa-miR-4270 NM_053285 | TEKT1 | 1 |
| hsa-miR-4270 NM_053285 | TEKT1 | 1 |
| hsa-miR-4281 NM_053285 | TEKT1 | 1 |
| hsa-miR-4281 NM_053285 | TEKT1 | 1 |
| hsa-miR-4283 NM_053285 | TEKT1 | 1 |
| hsa-miR-4292 NM_053285 | TEKT1 | 1 |
| hsa-miR-500b NM_053285 | TEKT1 | 1 |
| hsa-miR-3605 NM_053285 | TEKT1 | 1 |
| hsa-miR-3612 NM_053285 | TEKT1 | 1 |
| hsa-miR-3614 NM_053285 | TEKT1 | 1 |
| hsa-miR-3620 NM_053285 | TEKT1 | 1 |
| hsa-miR-3620 NM_053285 | TEKT1 | 1 |
| hsa-miR-3622 NM_053285 | TEKT1 | 1 |
| hsa-miR-3648 NM_053285 | TEKT1 | 1 |
| hsa-miR-3648 NM_053285 | TEKT1 | 1 |
| hsa-miR-3655 NM_053285 | TEKT1 | 1 |
| hsa-miR-3666 NM_053285 | TEKT1 | 1 |
| hsa-miR-3667 NM_053285 | TEKT1 | 1 |
| hsa-miR-3678 NM_053285 | TEKT1 | 1 |
| hsa-miR-3679 NM_053285 | TEKT1 | 1 |
| hsa-miR-3680 NM_053285 | TEKT1 | 1 |
| hsa-miR-3680 NM_053285 | TEKT1 | 1 |
| hsa-miR-3689 NM_053285 | TEKT1 | 1 |
| hsa-miR-3692 NM_053285 | TEKT1 | 1 |
| hsa-miR-3689 NM_053285 | TEKT1 | 1 |
| hsa-miR-3911 NM_053285 | TEKT1 | 1 |
| hsa-miR-3911 NM_053285 | TEKT1 | 1 |
| hsa-miR-3934 NM_053285 | TEKT1 | 1 |
| hsa-miR-3934 NM_053285 | TEKT1 | 1 |
| hsa-miR-3936 NM_053285 | TEKT1 | 1 |
| hsa-miR-3936 NM_053285 | TEKT1 | 1 |
| hsa-miR-3937 NM_053285 | TEKT1 | 1 |
| hsa-miR-3944 NM_053285 | TEKT1 | 1 |
| hsa-miR-3945 NM_053285 | TEKT1 | 1 |
| hsa-miR-4420 NM_053285 | TEKT1 | 1 |
| hsa-miR-4421 NM_053285 | TEKT1 | 1 |
| hsa-miR-4422 NM_053285 | TEKT1 | 1 |
| hsa-miR-4429 NM_053285 | TEKT1 | 1 |
| hsa-miR-4438 NM_053285 | TEKT1 | 1 |
| hsa-miR-4442 NM_053285 | TEKT1 | 1 |
| hsa-miR-4446 NM_053285 | TEKT1 | 1 |
| hsa-miR-4454 NM_053285 | TEKT1 | 1 |
| hsa-miR-4462 NM_053285 | TEKT1 | 1 |
| hsa-miR-4476 NM_053285 | TEKT1 | 1 |
| hsa-miR-3689 NM_053285 | TEKT1 | 1 |
| hsa-miR-4481 NM_053285 | TEKT1 | 1 |
| hsa-miR-4482 NM_053285 | TEKT1 | 1 |
| hsa-miR-4483 NM_053285 | TEKT1 | 1 |
| hsa-miR-4490 NM_053285 | TEKT1 | 1 |
| hsa-miR-4499 NM_053285 | TEKT1 | 1 |
| hsa-miR-4507 NM_053285 | TEKT1 | 1 |
| hsa-miR-4513 NM_053285 | TEKT1 | 1 |
| hsa-miR-4514 NM_053285 | TEKT1 | 1 |
| hsa-miR-4518 NM_053285 | TEKT1 | 1 |
| hsa-miR-4520 NM_053285 | TEKT1 | 1 |
| hsa-miR-4524 NM_053285 | TEKT1 | 1 |
| hsa-miR-4525 NM_053285 | TEKT1 | 1 |
| hsa-miR-4533 NM_053285 | TEKT1 | 1 |
| hsa-miR-1587 NM_053285 | TEKT1 | 1 |
| hsa-miR-1587 NM_053285 | TEKT1 | 1 |
| hsa-miR-4539 NM_053285 | TEKT1 | 1 |
| hsa-miR-3960 NM_053285 | TEKT1 | 1 |
| hsa-miR-3972 NM_053285 | TEKT1 | 1 |
| hsa-miR-3978 NM_053285 | TEKT1 | 1 |
| hsa-miR-4632 NM_053285 | TEKT1 | 1 |
| hsa-miR-4635 NM_053285 | TEKT1 | 1 |
| hsa-miR-4641 NM_053285 | TEKT1 | 1 |
| hsa-miR-4649 NM_053285 | TEKT1 | 1 |
| hsa-miR-4649 NM_053285 | TEKT1 | 1 |
| hsa-miR-4652 NM_053285 | TEKT1 | 1 |
| hsa-miR-4655 NM_053285 | TEKT1 | 1 |
| hsa-miR-4663 NM_053285 | TEKT1 | 1 |
| hsa-miR-4664 NM_053285 | TEKT1 | 1 |
| hsa-miR-4667 NM_053285 | TEKT1 | 1 |
| hsa-miR-219b NM_053285 | TEKT1 | 1 |
| hsa-miR-4672 NM_053285 | TEKT1 | 1 |
| hsa-miR-4672 NM_053285 | TEKT1 | 1 |
| hsa-miR-4673 NM_053285 | TEKT1 | 1 |
| hsa-miR-4674 NM_053285 | TEKT1 | 1 |
| hsa-miR-4675 NM_053285 | TEKT1 | 1 |
| hsa-miR-4676 NM_053285 | TEKT1 | 1 |
| hsa-miR-4676 NM_053285 | TEKT1 | 1 |
| hsa-miR-4687 NM_053285 | TEKT1 | 1 |
| hsa-miR-1343 NM_053285 | TEKT1 | 1 |
| hsa-miR-4688 NM_053285 | TEKT1 | 1 |
| hsa-miR-4688 NM_053285 | TEKT1 | 1 |
| hsa-miR-4689 NM_053285 | TEKT1 | 1 |
| hsa-miR-4697 NM_053285 | TEKT1 | 1 |





|                        |       |            |
|------------------------|-------|------------|
| hsa-miR-6847 NM_053285 | TEKT1 | 1          |
| hsa-miR-6848 NM_053285 | TEKT1 | 1          |
| hsa-miR-6852 NM_053285 | TEKT1 | 1          |
| hsa-miR-6852 NM_053285 | TEKT1 | 1          |
| hsa-miR-6853 NM_053285 | TEKT1 | 1          |
| hsa-miR-6853 NM_053285 | TEKT1 | 1          |
| hsa-miR-6856 NM_053285 | TEKT1 | 1          |
| hsa-miR-6857 NM_053285 | TEKT1 | 1          |
| hsa-miR-686C NM_053285 | TEKT1 | 1          |
| hsa-miR-6861 NM_053285 | TEKT1 | 1          |
| hsa-miR-6865 NM_053285 | TEKT1 | 1          |
| hsa-miR-6867 NM_053285 | TEKT1 | 1          |
| hsa-miR-6868 NM_053285 | TEKT1 | 1          |
| hsa-miR-6869 NM_053285 | TEKT1 | 1          |
| hsa-miR-6869 NM_053285 | TEKT1 | 1          |
| hsa-miR-6871 NM_053285 | TEKT1 | 1          |
| hsa-miR-6871 NM_053285 | TEKT1 | 1          |
| hsa-miR-6875 NM_053285 | TEKT1 | 1          |
| hsa-miR-6877 NM_053285 | TEKT1 | 1          |
| hsa-miR-6878 NM_053285 | TEKT1 | 1          |
| hsa-miR-6879 NM_053285 | TEKT1 | 1          |
| hsa-miR-6882 NM_053285 | TEKT1 | 1          |
| hsa-miR-6883 NM_053285 | TEKT1 | 1          |
| hsa-miR-6886 NM_053285 | TEKT1 | 1          |
| hsa-miR-6887 NM_053285 | TEKT1 | 1          |
| hsa-miR-6889 NM_053285 | TEKT1 | 1          |
| hsa-miR-6889 NM_053285 | TEKT1 | 1          |
| hsa-miR-689C NM_053285 | TEKT1 | 1          |
| hsa-miR-689C NM_053285 | TEKT1 | 1          |
| hsa-miR-7106 NM_053285 | TEKT1 | 1          |
| hsa-miR-7106 NM_053285 | TEKT1 | 1          |
| hsa-miR-7107 NM_053285 | TEKT1 | 1          |
| hsa-miR-7108 NM_053285 | TEKT1 | 1          |
| hsa-miR-7109 NM_053285 | TEKT1 | 1          |
| hsa-miR-711C NM_053285 | TEKT1 | 1          |
| hsa-miR-7111 NM_053285 | TEKT1 | 1          |
| hsa-miR-7113 NM_053285 | TEKT1 | 1          |
| hsa-miR-7114 NM_053285 | TEKT1 | 1          |
| hsa-miR-7151 NM_053285 | TEKT1 | 1          |
| hsa-miR-7152 NM_053285 | TEKT1 | 1          |
| hsa-miR-7152 NM_053285 | TEKT1 | 1          |
| hsa-miR-7155 NM_053285 | TEKT1 | 1          |
| hsa-miR-7156 NM_053285 | TEKT1 | 1          |
| hsa-miR-7156 NM_053285 | TEKT1 | 1          |
| hsa-miR-7156 NM_053285 | TEKT1 | 1          |
| hsa-miR-7158 NM_053285 | TEKT1 | 1          |
| hsa-miR-7158 NM_053285 | TEKT1 | 1          |
| hsa-miR-716C NM_053285 | TEKT1 | 1          |
| hsa-miR-7845 NM_053285 | TEKT1 | 1          |
| hsa-miR-7845 NM_053285 | TEKT1 | 1          |
| hsa-miR-7846 NM_053285 | TEKT1 | 1          |
| hsa-miR-7847 NM_053285 | TEKT1 | 1          |
| hsa-miR-7847 NM_053285 | TEKT1 | 1          |
| hsa-miR-7851 NM_053285 | TEKT1 | 1          |
| hsa-miR-7974 NM_053285 | TEKT1 | 1          |
| hsa-miR-8055 NM_053285 | TEKT1 | 1          |
| hsa-miR-806C NM_053285 | TEKT1 | 1          |
| hsa-miR-8073 NM_053285 | TEKT1 | 1          |
| hsa-miR-8075 NM_053285 | TEKT1 | 1          |
| hsa-miR-8076 NM_053285 | TEKT1 | 1          |
| hsa-miR-8079 NM_053285 | TEKT1 | 1          |
| hsa-miR-8086 NM_053285 | TEKT1 | 1          |
| hsa-miR-1039 NM_053285 | TEKT1 | 1          |
| hsa-miR-104C NM_053285 | TEKT1 | 1          |
| hsa-miR-1052 NM_053285 | TEKT1 | 1          |
| hsa-miR-1118 NM_053285 | TEKT1 | 1          |
| hsa-miR-1118 NM_053285 | TEKT1 | 1          |
| hsa-miR-1139 NM_053285 | TEKT1 | 1          |
| hsa-miR-114C NM_053285 | TEKT1 | 1          |
| hsa-miR-6529 NM_053285 | TEKT1 | 1          |
| hsa-miR-6529 NM_053285 | TEKT1 | 1          |
| hsa-miR-1211 NM_053285 | TEKT1 | 1          |
| hsa-miR-1211 NM_053285 | TEKT1 | 1          |
| hsa-miR-1213 NM_053285 | TEKT1 | 1          |
| hsa-miR-6852 NM_138805 | FAM3D | 0.96153846 |
| hsa-miR-6894 NM_138805 | FAM3D | 0.96153846 |
| hsa-miR-215- NM_138805 | FAM3D | 0.97435897 |
| hsa-miR-6792 NM_138805 | FAM3D | 0.97435897 |
| hsa-miR-517- NM_138805 | FAM3D | 0.98076923 |
| hsa-miR-27a- NM_138805 | FAM3D | 1          |
| hsa-miR-127- NM_138805 | FAM3D | 1          |
| hsa-miR-150- NM_138805 | FAM3D | 1          |
| hsa-miR-301a NM_138805 | FAM3D | 1          |
| hsa-miR-365b NM_138805 | FAM3D | 1          |
| hsa-miR-370- NM_138805 | FAM3D | 1          |
| hsa-miR-378a NM_138805 | FAM3D | 1          |
| hsa-miR-328- NM_138805 | FAM3D | 1          |
| hsa-miR-485- NM_138805 | FAM3D | 1          |
| hsa-miR-492 NM_138805  | FAM3D | 1          |
| hsa-miR-515- NM_138805 | FAM3D | 1          |
| hsa-miR-526b NM_138805 | FAM3D | 1          |
| hsa-miR-525- NM_138805 | FAM3D | 1          |
| hsa-miR-92b- NM_138805 | FAM3D | 1          |
| hsa-miR-564 NM_138805  | FAM3D | 1          |

|              |           |       |   |
|--------------|-----------|-------|---|
| hsa-miR-567  | NM_138805 | FAM3D | 1 |
| hsa-miR-576  | NM_138805 | FAM3D | 1 |
| hsa-miR-593  | NM_138805 | FAM3D | 1 |
| hsa-miR-605  | NM_138805 | FAM3D | 1 |
| hsa-miR-668  | NM_138805 | FAM3D | 1 |
| hsa-miR-1224 | NM_138805 | FAM3D | 1 |
| hsa-miR-151b | NM_138805 | FAM3D | 1 |
| hsa-miR-766  | NM_138805 | FAM3D | 1 |
| hsa-miR-892a | NM_138805 | FAM3D | 1 |
| hsa-miR-892b | NM_138805 | FAM3D | 1 |
| hsa-miR-301b | NM_138805 | FAM3D | 1 |
| hsa-miR-1231 | NM_138805 | FAM3D | 1 |
| hsa-miR-1238 | NM_138805 | FAM3D | 1 |
| hsa-miR-1275 | NM_138805 | FAM3D | 1 |
| hsa-miR-1914 | NM_138805 | FAM3D | 1 |
| hsa-miR-1915 | NM_138805 | FAM3D | 1 |
| hsa-miR-3125 | NM_138805 | FAM3D | 1 |
| hsa-miR-3127 | NM_138805 | FAM3D | 1 |
| hsa-miR-3127 | NM_138805 | FAM3D | 1 |
| hsa-miR-3141 | NM_138805 | FAM3D | 1 |
| hsa-miR-3175 | NM_138805 | FAM3D | 1 |
| hsa-miR-3181 | NM_138805 | FAM3D | 1 |
| hsa-miR-320e | NM_138805 | FAM3D | 1 |
| hsa-miR-3192 | NM_138805 | FAM3D | 1 |
| hsa-miR-3193 | NM_138805 | FAM3D | 1 |
| hsa-miR-4287 | NM_138805 | FAM3D | 1 |
| hsa-miR-4290 | NM_138805 | FAM3D | 1 |
| hsa-miR-3615 | NM_138805 | FAM3D | 1 |
| hsa-miR-3615 | NM_138805 | FAM3D | 1 |
| hsa-miR-3622 | NM_138805 | FAM3D | 1 |
| hsa-miR-3685 | NM_138805 | FAM3D | 1 |
| hsa-miR-4433 | NM_138805 | FAM3D | 1 |
| hsa-miR-4458 | NM_138805 | FAM3D | 1 |
| hsa-miR-3685 | NM_138805 | FAM3D | 1 |
| hsa-miR-4492 | NM_138805 | FAM3D | 1 |
| hsa-miR-4497 | NM_138805 | FAM3D | 1 |
| hsa-miR-4515 | NM_138805 | FAM3D | 1 |
| hsa-miR-4632 | NM_138805 | FAM3D | 1 |
| hsa-miR-4665 | NM_138805 | FAM3D | 1 |
| hsa-miR-4667 | NM_138805 | FAM3D | 1 |
| hsa-miR-4673 | NM_138805 | FAM3D | 1 |
| hsa-miR-4673 | NM_138805 | FAM3D | 1 |
| hsa-miR-4686 | NM_138805 | FAM3D | 1 |
| hsa-miR-4688 | NM_138805 | FAM3D | 1 |
| hsa-miR-4695 | NM_138805 | FAM3D | 1 |
| hsa-miR-4701 | NM_138805 | FAM3D | 1 |
| hsa-miR-4706 | NM_138805 | FAM3D | 1 |
| hsa-miR-4708 | NM_138805 | FAM3D | 1 |
| hsa-miR-4725 | NM_138805 | FAM3D | 1 |
| hsa-miR-4745 | NM_138805 | FAM3D | 1 |
| hsa-miR-4751 | NM_138805 | FAM3D | 1 |
| hsa-miR-4753 | NM_138805 | FAM3D | 1 |
| hsa-miR-4756 | NM_138805 | FAM3D | 1 |
| hsa-miR-4763 | NM_138805 | FAM3D | 1 |
| hsa-miR-4767 | NM_138805 | FAM3D | 1 |
| hsa-miR-4787 | NM_138805 | FAM3D | 1 |
| hsa-miR-5581 | NM_138805 | FAM3D | 1 |
| hsa-miR-5682 | NM_138805 | FAM3D | 1 |
| hsa-miR-5683 | NM_138805 | FAM3D | 1 |
| hsa-miR-1195 | NM_138805 | FAM3D | 1 |
| hsa-miR-6090 | NM_138805 | FAM3D | 1 |
| hsa-miR-6510 | NM_138805 | FAM3D | 1 |
| hsa-miR-6514 | NM_138805 | FAM3D | 1 |
| hsa-miR-6721 | NM_138805 | FAM3D | 1 |
| hsa-miR-6727 | NM_138805 | FAM3D | 1 |
| hsa-miR-6734 | NM_138805 | FAM3D | 1 |
| hsa-miR-6735 | NM_138805 | FAM3D | 1 |
| hsa-miR-6744 | NM_138805 | FAM3D | 1 |
| hsa-miR-6751 | NM_138805 | FAM3D | 1 |
| hsa-miR-6754 | NM_138805 | FAM3D | 1 |
| hsa-miR-6770 | NM_138805 | FAM3D | 1 |
| hsa-miR-6780 | NM_138805 | FAM3D | 1 |
| hsa-miR-6784 | NM_138805 | FAM3D | 1 |
| hsa-miR-6787 | NM_138805 | FAM3D | 1 |
| hsa-miR-6791 | NM_138805 | FAM3D | 1 |
| hsa-miR-6795 | NM_138805 | FAM3D | 1 |
| hsa-miR-6816 | NM_138805 | FAM3D | 1 |
| hsa-miR-6825 | NM_138805 | FAM3D | 1 |
| hsa-miR-6835 | NM_138805 | FAM3D | 1 |
| hsa-miR-6843 | NM_138805 | FAM3D | 1 |
| hsa-miR-6854 | NM_138805 | FAM3D | 1 |
| hsa-miR-6855 | NM_138805 | FAM3D | 1 |
| hsa-miR-6866 | NM_138805 | FAM3D | 1 |
| hsa-miR-6874 | NM_138805 | FAM3D | 1 |
| hsa-miR-6878 | NM_138805 | FAM3D | 1 |
| hsa-miR-7106 | NM_138805 | FAM3D | 1 |
| hsa-miR-7112 | NM_138805 | FAM3D | 1 |
| hsa-miR-7114 | NM_138805 | FAM3D | 1 |
| hsa-miR-7150 | NM_138805 | FAM3D | 1 |
| hsa-miR-7156 | NM_138805 | FAM3D | 1 |
| hsa-miR-7160 | NM_138805 | FAM3D | 1 |
| hsa-miR-4433 | NM_138805 | FAM3D | 1 |
| hsa-miR-1273 | NM_138805 | FAM3D | 1 |
| hsa-miR-7978 | NM_138805 | FAM3D | 1 |

|              |           |       |   |
|--------------|-----------|-------|---|
| hsa-miR-1039 | NM_138805 | FAM3D | 1 |
| hsa-miR-1039 | NM_138805 | FAM3D | 1 |
| hsa-miR-1039 | NM_138805 | FAM3D | 1 |
| hsa-miR-1211 | NM_138805 | FAM3D | 1 |

## Supplementary table 5

### Summary of hub genes.

| ID          | Gene:title          | Gene: symbol | Gene:ID | GenBank:Acc | Chromosome   | Chromosome    | logFC      | AveExpr    | t          | P:Value    | adj.P.Val  | sig  |
|-------------|---------------------|--------------|---------|-------------|--------------|---------------|------------|------------|------------|------------|------------|------|
| 204748_at   | prostaglandin PTGS2 |              | 5743    | NM_000963   | 1q25.2-q25.3 | Chromosome 3  | 1.6667657  | 6.93533666 | 3.04867631 | 0.00484908 | 0.35860098 | UP   |
| 211719_x_at | fibronectin 1 FN1   |              | 2335    | BC005858    | 2q34         | Chromosome 2  | 1.1753329  | 9.18110901 | 2.49650052 | 0.01843405 | 0.53415589 | UP   |
| 204475_at   | matrix metallo MMP1 |              | 4312    | NM_002421   | 11q22.3      | Chromosome 4  | 4.0689709  | 7.17515732 | 3.14816202 | 0.0037703  | 0.33206949 | UP   |
| 211668_s_at | plasmihogen PLAU    |              | 5328    | AH007073    | 10q22.2      | Chromosome 3  | 1.1102172  | 7.69598447 | 4.35734683 | 0.00014883 | 0.08503438 | UP   |
| 205628_at   | matrix metallo MMP3 |              | 4314    | NM_002422   | 11q22.3      | Chromosome 1  | 1.74777973 | 6.45166842 | 1.49350805 | 0.14603782 | 0.78579535 | UP   |
| 206398_s_at | CD19 molecu CD19    |              | 930     | NM_001770   | 16p11.2      | Chromosome -1 | 2.940458   | 6.24482953 | -1.5817579 | 0.12448311 | 0.76331215 | DOWN |
| 205289_at   | bone morpho BMP2    |              | 650     | AA583044    | 20p12        | Chromosome 0  | 5.7263978  | 4.61484683 | 0.72624605 | 0.47347268 | 0.92191469 | UP   |
| 204213_at   | polymeric immr PLGR |              | 5284    | NM_002644   | 1q31-q41     | Chromosome -2 | 1.194156   | 6.81087127 | -2.3458694 | 0.02598389 | 0.57847579 | DOWN |

**Supplementary table 6****Summary of molecule agents predicted using CMap.**

| rank | cmap name           | mean   | n  | enrichment | p       | specificity | percent non-r |
|------|---------------------|--------|----|------------|---------|-------------|---------------|
|      | 3 phenoxybenz       | -0.743 | 4  | -0.917     | 0.0001  | 0.0091      | 100           |
|      | 5 luteolin          | -0.752 | 4  | -0.902     | 0.00016 | 0           | 100           |
|      | 7 thioguanosine     | -0.707 | 4  | -0.869     | 0.00058 | 0.007       | 100           |
|      | 28 reserpine        | -0.71  | 3  | -0.863     | 0.00519 | 0.0201      | 100           |
|      | 90 blebbistatin     | -0.643 | 2  | -0.857     | 0.04072 | 0.0608      | 100           |
|      | 31 camptothecin     | -0.707 | 3  | -0.847     | 0.00709 | 0.1818      | 100           |
|      | 12 apigenin         | -0.771 | 4  | -0.837     | 0.00123 | 0.0163      | 100           |
|      | 45 caffeic acid     | -0.6   | 3  | -0.799     | 0.01679 | 0.0139      | 100           |
|      | 51 verteporfin      | -0.692 | 3  | -0.785     | 0.02029 | 0.0756      | 100           |
|      | 27 6-azathymine     | -0.628 | 4  | -0.78      | 0.00487 | 0.0058      | 100           |
|      | 26 omeprazole       | -0.629 | 4  | -0.78      | 0.00483 | 0.0246      | 100           |
|      | 9 morantel          | -0.605 | 5  | -0.776     | 0.00096 | 0.0048      | 100           |
|      | 62 canavanine       | -0.606 | 3  | -0.763     | 0.02722 | 0.0412      | 100           |
|      | 32 thiostrepton     | -0.668 | 4  | -0.752     | 0.00762 | 0.0463      | 100           |
|      | 37 sitosterol       | -0.59  | 4  | -0.737     | 0.00949 | 0.0306      | 100           |
|      | 40 daunorubicin     | -0.622 | 4  | -0.726     | 0.01158 | 0.114       | 100           |
|      | 39 amoxicillin      | -0.581 | 4  | -0.726     | 0.01154 | 0.0444      | 100           |
|      | 22 meticrane        | -0.656 | 5  | -0.717     | 0.00395 | 0.0195      | 100           |
|      | 42 spectinomycin    | -0.576 | 4  | -0.714     | 0.01343 | 0           | 100           |
|      | 11 0175029-000      | -0.666 | 6  | -0.714     | 0.00115 | 0.0775      | 83            |
|      | 47 xylometazolin    | -0.584 | 4  | -0.696     | 0.01804 | 0.0166      | 100           |
|      | 48 rimexolone       | -0.617 | 4  | -0.693     | 0.019   | 0.0725      | 100           |
|      | 49 nipecotic acid   | -0.54  | 4  | -0.691     | 0.01971 | 0.0266      | 100           |
|      | 61 monobenzonitrile | -0.572 | 4  | -0.669     | 0.02715 | 0.0405      | 100           |
|      | 64 epitiostanol     | -0.522 | 4  | -0.664     | 0.02863 | 0.0556      | 100           |
|      | 66 apramycin        | -0.483 | 4  | -0.66      | 0.03046 | 0.128       | 75            |
|      | 70 ketanserin       | -0.556 | 4  | -0.658     | 0.03127 | 0.0269      | 100           |
|      | 71 levycycloserine  | -0.629 | 4  | -0.657     | 0.03149 | 0.0773      | 100           |
|      | 73 fluspirilene     | -0.593 | 4  | -0.656     | 0.03241 | 0.0885      | 100           |
|      | 25 flunisolid       | -0.605 | 6  | -0.654     | 0.00471 | 0           | 100           |
|      | 78 parthenolide     | -0.522 | 4  | -0.652     | 0.03443 | 0.2207      | 100           |
|      | 86 tolfenamic acid  | -0.52  | 4  | -0.642     | 0.03945 | 0.0353      | 100           |
|      | 89 capsaicin        | -0.586 | 4  | -0.64      | 0.04024 | 0.0437      | 100           |
|      | 93 doxazosin        | -0.511 | 4  | -0.633     | 0.04402 | 0.1846      | 75            |
|      | 95 sulconazole      | -0.496 | 4  | -0.63      | 0.04611 | 0.1118      | 75            |
|      | 94 chlorambucil     | -0.46  | 4  | -0.63      | 0.04589 | 0.0779      | 75            |
|      | 54 procaine         | -0.488 | 5  | -0.615     | 0.02313 | 0.1371      | 80            |
|      | 38 flumetasone      | -0.532 | 6  | -0.613     | 0.01079 | 0.0248      | 83            |
|      | 59 Prestwick-665    | -0.525 | 5  | -0.607     | 0.02643 | 0.0688      | 80            |
|      | 10 resveratrol      | -0.535 | 9  | -0.607     | 0.00104 | 0.0833      | 77            |
|      | 44 solasodine       | -0.312 | 6  | -0.591     | 0.01643 | 0.0117      | 66            |
|      | 76 gallamine triel  | -0.485 | 5  | -0.59      | 0.03394 | 0.037       | 80            |
|      | 83 trimethoprim     | -0.45  | 5  | -0.582     | 0.03773 | 0.0449      | 80            |
|      | 96 nalidixic acid   | -0.404 | 5  | -0.564     | 0.04796 | 0.0487      | 60            |
|      | 67 medrysone        | -0.611 | 6  | -0.552     | 0.03049 | 0.3676      | 83            |
|      | 98 0173570-000      | -0.501 | 6  | -0.521     | 0.0494  | 0.219       | 83            |
|      | 79 methotrexate     | -0.361 | 8  | -0.477     | 0.03456 | 0.137       | 75            |
|      | 87 vorinostat       | -0.37  | 12 | -0.388     | 0.03945 | 0.6018      | 66            |



|    |                 |        |     |        |         |        |     |
|----|-----------------|--------|-----|--------|---------|--------|-----|
| 1  | trichostatin A  | -0.276 | 182 | -0.188 | 0       | 0.8317 | 53  |
| 97 | diethylstilbest | 0.277  | 6   | 0.52   | 0.04877 | 0.3053 | 50  |
| 74 | myosmine        | 0.33   | 6   | 0.547  | 0.03297 | 0.0916 | 66  |
| 80 | midodrine       | 0.386  | 5   | 0.59   | 0.03579 | 0.1788 | 80  |
| 75 | lycorine        | 0.318  | 5   | 0.595  | 0.03362 | 0.284  | 80  |
| 69 | trimethobenz    | 0.379  | 5   | 0.6    | 0.03108 | 0.2147 | 80  |
| 65 | thioperamide    | 0.459  | 5   | 0.604  | 0.02988 | 0.1348 | 80  |
| 55 | digoxigenin     | 0.356  | 5   | 0.62   | 0.02331 | 0.1886 | 80  |
| 53 | biperiden       | 0.521  | 5   | 0.622  | 0.02251 | 0.2546 | 80  |
| 92 | canadine        | 0.492  | 4   | 0.638  | 0.04213 | 0.2454 | 75  |
| 91 | viomycin        | 0.521  | 4   | 0.639  | 0.04132 | 0.3526 | 75  |
| 88 | methyl dopate   | 0.295  | 4   | 0.643  | 0.03949 | 0.04   | 75  |
| 85 | chloropyrazin   | 0.321  | 4   | 0.643  | 0.03937 | 0.1076 | 50  |
| 82 | furazolidone    | 0.497  | 4   | 0.646  | 0.03768 | 0.1161 | 75  |
| 29 | ethisterone     | 0.371  | 6   | 0.646  | 0.00564 | 0      | 66  |
| 81 | metoprolol      | 0.32   | 4   | 0.648  | 0.0368  | 0.0497 | 75  |
| 77 | (+)-chelidoni   | 0.492  | 4   | 0.652  | 0.03416 | 0.033  | 75  |
| 72 | 0316684-000     | 0.46   | 4   | 0.657  | 0.03177 | 0.0064 | 75  |
| 68 | isocorydine     | 0.32   | 4   | 0.659  | 0.03105 | 0.0182 | 50  |
| 63 | pivmecillinam   | 0.284  | 4   | 0.667  | 0.02741 | 0.0305 | 50  |
| 60 | oxybenzone      | 0.44   | 4   | 0.669  | 0.02678 | 0.0941 | 75  |
| 57 | loxapine        | 0.219  | 4   | 0.676  | 0.02401 | 0.0106 | 50  |
| 56 | streptozocin    | 0.53   | 4   | 0.678  | 0.02335 | 0.0417 | 75  |
| 35 | ciprofloxacin   | 0.271  | 5   | 0.678  | 0.00893 | 0      | 60  |
| 20 | aciclovir       | 0.394  | 6   | 0.68   | 0.00284 | 0.0062 | 66  |
| 52 | alverine        | 0.262  | 4   | 0.682  | 0.02194 | 0      | 50  |
| 33 | merbromin       | 0.335  | 5   | 0.684  | 0.00801 | 0.0688 | 80  |
| 50 | cefotiam        | 0.455  | 4   | 0.688  | 0.02005 | 0.0633 | 75  |
| 18 | vincamine       | 0.406  | 6   | 0.692  | 0.00224 | 0      | 66  |
| 46 | furosemide      | 0.411  | 4   | 0.699  | 0.01695 | 0.0231 | 75  |
| 43 | Prestwick-857   | 0.389  | 4   | 0.707  | 0.01522 | 0.0581 | 75  |
| 41 | Trolox C        | 0.332  | 4   | 0.723  | 0.0117  | 0.0081 | 75  |
| 84 | SC-560          | 0.436  | 3   | 0.732  | 0.03784 | 0.0748 | 66  |
| 21 | dicycloverine   | 0.457  | 5   | 0.735  | 0.003   | 0.0055 | 80  |
| 36 | bambuterol      | 0.45   | 4   | 0.737  | 0.00939 | 0      | 75  |
| 19 | adiphenine      | 0.572  | 5   | 0.74   | 0.00278 | 0.1915 | 80  |
| 34 | perhexiline     | 0.337  | 4   | 0.741  | 0.00859 | 0.057  | 50  |
| 30 | cinchonine      | 0.43   | 4   | 0.754  | 0.00702 | 0.08   | 75  |
| 58 | tetracaine      | 0.337  | 3   | 0.764  | 0.0263  | 0.0294 | 66  |
| 13 | guanabenz       | 0.515  | 5   | 0.775  | 0.00128 | 0      | 80  |
| 23 | raubasine       | 0.453  | 4   | 0.783  | 0.00412 | 0.0064 | 100 |
| 16 | cloxacillin     | 0.551  | 4   | 0.82   | 0.00183 | 0      | 100 |
| 14 | PHA-007675(     | 0.519  | 4   | 0.828  | 0.00133 | 0      | 100 |
| 8  | clorsulon       | 0.589  | 4   | 0.852  | 0.00072 | 0      | 100 |
| 4  | heptaminol      | 0.623  | 5   | 0.854  | 0.00014 | 0.0121 | 100 |
| 24 | vigabatrin      | 0.622  | 3   | 0.865  | 0.00453 | 0.0177 | 100 |
| 6  | iopromide       | 0.651  | 4   | 0.88   | 0.00028 | 0      | 100 |
| 17 | Gly-His-Lys     | 0.59   | 3   | 0.898  | 0.00206 | 0      | 100 |
| 15 | carbimazole     | 0.627  | 3   | 0.913  | 0.00138 | 0      | 100 |
| 2  | podophyllo      | 0.713  | 4   | 0.926  | 0.00004 | 0.0048 | 100 |
